# Supplementary material for: Biomechanical Isolation is Required for Maintenance of the Cardiac Pacemaker Cell Fate
Source: Research Square preprint supplement (doi:10.21203/rs.3.rs-9520289/v1), 2026-05-04
Supplement: Supplementary file 2 [file 2f8622e8e9e05f5de743d498.xlsx]

## Sheet: IPA Protein Pathways
SAN_VT_Pathways	-log(p-value)	Number of Genes	SAN_At_Pathways	-log(p-value)	Number of Genes	Common_Pathways (San v Atria+Vent)
Protein Ubiquitination Pathway	9.9	45	Respiratory electron transport	6.96	17	Protein Ubiquitination Pathway
RHO GTPase cycle	8.54	58	Glycolysis I	6.84	10	RHO GTPase cycle
Collagen biosynthesis and modifying enzymes	7.76	18	Protein Ubiquitination Pathway	6.67	32	Collagen biosynthesis and modifying enzymes
AMPK Signaling	7.49	37	Elastic fibre formation	5.88	11	AMPK Signaling
Striated Muscle Contraction	7.47	13	Striated Muscle Contraction	5.85	10	Striated Muscle Contraction
Elastic fibre formation	7.19	14	Interconversion of nucleotide di- and triphosphates	5.77	9	Elastic fibre formation
Cilia Biogenesis Signaling Pathway	6.91	32	Extracellular matrix organization	5.7	17	Hypoxia Signaling in the Cardiovascular System
Hypoxia Signaling in the Cardiovascular System	6.66	18	3-phosphoinositide Degradation	5.44	24	L1CAM interactions
Mitotic G2-G2/M phases	6.6	31	Regulation of Insulin-like Growth Factor (IGF) transport and uptake by IGFBPs	5.42	18	Extracellular matrix organization
L1CAM interactions	6.46	23	Endosomal Sorting Complex Required For Transport (ESCRT)	5.37	9	Smooth Muscle Contraction
ILK Signaling	6.24	30	Cristae formation	5.25	9	Signaling by ROBO receptors
Extracellular matrix organization	5.75	20	Glycosaminoglycan metabolism	5.22	18	Integrin cell surface interactions
IL-1 Signaling	5.75	19	Sirtuin Signaling Pathway	5.09	30	Protein Kinase A Signaling
Smooth Muscle Contraction	5.57	12	Post-translational protein phosphorylation	5.05	16	Thrombin Signaling
Signaling by ROBO receptors	5.41	35	Glucose metabolism	4.87	14	Sirtuin Signaling Pathway
Integrin cell surface interactions	5.4	17	Collagen biosynthesis and modifying enzymes	4.74	12	Estrogen Receptor Signaling
CDK5 Signaling	5.22	19	Degradation of the extracellular matrix	4.55	13	Integrin Signaling
MAP kinase activation	5.2	11	3-phosphoinositide Biosynthesis	4.43	23	Gluconeogenesis I
ABRA Signaling Pathway	5.19	17	Estrogen Receptor Signaling	4.26	35	Cardiac Hypertrophy Signaling
Protein Kinase A Signaling	5.18	45	Smooth Muscle Contraction	4.25	9	Dilated Cardiomyopathy Signaling Pathway
Thrombin Signaling	5.11	30	RHO GTPase cycle	4.15	37	NCAM signaling for neurite out-growth
Tight Junction Signaling	5.02	26	Serotonin Receptor Signaling	4.11	38	Hepatic Fibrosis Signaling Pathway
IL-6 Signaling	5.02	21	Trafficking and processing of endosomal TLR	3.92	5	Signaling by Rho Family GTPases
Sirtuin Signaling Pathway	4.92	36	Signaling by PDGF	3.9	10	Regulation of Insulin-like Growth Factor (IGF) transport and uptake by IGFBPs
Response to elevated platelet cytosolic Ca2+	4.86	21	CLEAR Signaling Pathway	3.79	26	CLEAR Signaling Pathway
Estrogen Receptor Signaling	4.85	45	Dilated Cardiomyopathy Signaling Pathway	3.72	17	Acute Phase Response Signaling
Integrin Signaling	4.74	28	AMPK Signaling	3.63	23	IL-8 Signaling
CXCR4 Signaling	4.65	24	Protein Kinase A Signaling	3.48	32	NRF2-mediated Oxidative Stress Response
Semaphorin Neuronal Repulsive Signaling Pathway	4.63	22	Processing and activation of SUMO	3.11	4	Collagen chain trimerization
Gluconeogenesis I	4.59	9	Integrin cell surface interactions	3.11	11	Glycolysis I
Cardiac Hypertrophy Signaling	4.57	32	Collagen degradation	2.9	9	Processing and activation of SUMO
Cilium Assembly	4.54	27	Gluconeogenesis I	2.89	6	Actin Cytoskeleton Signaling
Dilated Cardiomyopathy Signaling Pathway	4.45	22	Signaling by MET	2.8	10	Axonal Guidance Signaling
NCAM signaling for neurite out-growth	4.42	13	Axonal Guidance Signaling	2.69	36	RHOGDI Signaling
Hepatic Fibrosis Signaling Pathway	4.4	44	Necroptosis Signaling Pathway	2.5	15	GP6 Signaling Pathway
Signaling by Rho Family GTPases	4.38	32	Mitochondrial Fatty Acid Beta-Oxidation	2.41	6	NGF Signaling
Toll Like Receptor 3 (TLR3) Cascade	4.23	9	Gene and protein expression by JAK-STAT signaling after IL-12 stimulation	2.41	6	Ephrin Receptor Signaling
Regulation of Insulin-like Growth Factor (IGF) transport and uptake by IGFBPs	4.23	19	NRF2-mediated Oxidative Stress Response	2.33	21	Hepatic Fibrosis / Hepatic Stellate Cell Activation
CLEAR Signaling Pathway	4.2	33	Ferroptosis Signaling Pathway	2.32	13	RHOA Signaling
LPS-stimulated MAPK Signaling	4.17	15	Semaphorin interactions	2.31	8	Assembly of collagen fibrils and other multimeric structures
Acute Phase Response Signaling	4.17	25	Hypoxia Signaling in the Cardiovascular System	2.3	9	GNRH Signaling
EIF2 Signaling	4.03	31	Acute Phase Response Signaling	2.2	16	Cardiac β-adrenergic Signaling
IL-8 Signaling	3.97	26	Signaling by NTRK1 (TRKA)	2.19	9	Netrin-1 signaling
Nuclear Cytoskeleton Signaling Pathway	3.93	27	Hepatic Fibrosis / Hepatic Stellate Cell Activation	2.18	16	Ferroptosis Signaling Pathway
NRF2-mediated Oxidative Stress Response	3.91	31	Microautophagy Signaling Pathway	2.17	14	Collagen degradation
Collagen chain trimerization	3.9	10	Calcium Transport I	2.16	3	PDGF Signaling
ATM Signaling	3.88	16	GP6 Signaling Pathway	2.15	12	ERK/MAPK Signaling
Cell Cycle Checkpoints	3.85	31	Warburg Effect Signaling Pathway	2.09	12	Signal amplification
Glycolysis I	3.85	8	SUMOylation of transcription factors	2.07	4	Ephrin B Signaling
Kinesins	3.85	12	Superpathway of Geranylgeranyldiphosphate Biosynthesis I (via Mevalonate)	2.07	4	Semaphorin interactions
Processing and activation of SUMO	3.72	5	Superpathway of Cholesterol Biosynthesis	2.07	5	Caveolar-mediated Endocytosis Signaling
RANK Signaling in Osteoclasts	3.71	15	Folate Signaling Pathway	2.04	7	Calcium Signaling
MyD88-independent TLR4 cascade	3.71	9	RHO GTPases activate PAKs	2	4	Myelination Signaling Pathway
Actin Cytoskeleton Signaling	3.65	28	PDGF Signaling	1.99	9	HIF1α Signaling
Axonal Guidance Signaling	3.6	49	Ephrin Receptor Signaling	1.98	16	Retinoid metabolism and transport
RHOGDI Signaling	3.58	26	Activation of Matrix Metalloproteinases	1.95	5	GPER1 signaling
GP6 Signaling Pathway	3.56	18	Signal amplification	1.95	5	TNF signaling
BAG2 Signaling Pathway	3.55	14	Ketogenesis	1.92	3	Folate Signaling Pathway
PAK Signaling	3.52	17	Thrombin Signaling	1.91	17	Signaling by NTRK1 (TRKA)
Cardiac Hypertrophy Signaling (Enhanced)	3.51	50	Reelin Signaling in Neurons	1.9	12	Signaling by PDGF
CD40 Signaling	3.51	12	Actin Cytoskeleton Signaling	1.89	18	Calcium Transport I
Toll-like Receptor Signaling	3.5	13	Assembly of collagen fibrils and other multimeric structures	1.89	7	Gene and protein expression by JAK-STAT signaling after IL-12 stimulation
PFKFB4 Signaling Pathway	3.49	10	G alpha (z) signalling events	1.85	6	Necroptosis Signaling Pathway
Agrin Interactions at Neuromuscular Junction	3.45	12	HIF1α Signaling	1.83	16	Membrane Repair Signaling Pathway
MAPK targets/ Nuclear events mediated by MAP kinases	3.43	8	GNRH Signaling	1.82	15	Reelin Signaling in Neurons
NGF Signaling	3.39	17	NCAM signaling for neurite out-growth	1.81	7	Ketogenesis
Ephrin Receptor Signaling	3.39	24	Hepatic Fibrosis Signaling Pathway	1.81	27	RHO GTPases activate PAKs
IL-17A Signaling in Fibroblasts	3.33	13	Signaling by Rho Family GTPases	1.78	19	Circadian Rhythm Signaling
Hepatic Fibrosis / Hepatic Stellate Cell Activation	3.32	23	Glucocorticoid Receptor Signaling	1.74	36	G alpha (z) signalling events
RHOA Signaling	3.3	17	Syndecan interactions	1.61	4
Assembly of collagen fibrils and other multimeric structures	3.29	11	Integrin signaling	1.61	4
GNRH Signaling	3.29	23	Beta-catenin independent WNT signaling	1.61	15
Cardiac β-adrenergic Signaling	3.26	21	Cardiac β-adrenergic Signaling	1.59	13
Acute Myeloid Leukemia Signaling	3.24	14	RAF/MAP kinase cascade	1.58	18
Netrin-1 signaling	3.2	9	IL-8 Signaling	1.56	15
Ferroptosis Signaling Pathway	3.19	18	GPER1 signaling	1.56	9
Collagen degradation	3.11	11	NGF Signaling	1.53	10
PTEN Signaling	3.1	19	TNF signaling	1.52	6
Wound Healing Signaling Pathway	3.1	27	Regulation of Cellular Mechanics by Calpain Protease	1.5	8
Apoptosis Signaling	3.09	15	Ephrin B Signaling	1.5	7
RHO GTPases Activate Formins	3.08	18	RHOA Signaling	1.49	10
Interleukin-1 family signaling	3.06	17	Circadian Rhythm Signaling	1.47	18
GAIT Translation Signaling Pathway	3.02	27	L1CAM interactions	1.47	10
Cyclins and Cell Cycle Regulation	3.02	13	Myelination Signaling Pathway	1.47	21
NLR signaling pathways	3.01	10	Signaling by CSF3 (G-CSF)	1.46	4
PDGF Signaling	2.97	13	Netrin-1 signaling	1.46	5
Mitotic G1 phase and G1/S transition	2.95	17	Collagen chain trimerization	1.46	5
Apelin Endothelial Signaling Pathway	2.9	18	Retinoid metabolism and transport	1.46	5
PKR-mediated signaling	2.9	12	Signaling by ROBO receptors	1.44	18
IL-15 Production	2.89	16	Calcium Signaling	1.4	15
IL-17A Signaling in Airway Cells	2.89	11	Membrane Repair Signaling Pathway	1.4	9
Gα12/13 Signaling	2.88	17	Interleukin-4 and Interleukin-13 signaling	1.38	9
ERK/MAPK Signaling	2.86	24	RHOGDI Signaling	1.38	15
Sumoylation Pathway	2.83	14	ERK/MAPK Signaling	1.38	15
Semaphorin Signaling in Neurons	2.83	10	RHO GTPases activate CIT	1.37	3
GADD45 Signaling	2.77	10	Caveolar-mediated Endocytosis Signaling	1.34	7
Chemokine Signaling	2.76	12	Cardiac Hypertrophy Signaling	1.34	17
BEX2 Signaling Pathway	2.71	12	Glycation Signaling Pathway	1.3	15
Signal amplification	2.7	7
TNFR2 Signaling	2.7	7
Regulation of eIF4 and p70S6K Signaling	2.68	23
IGF-1 Signaling	2.67	14
TNFR1 Signaling	2.66	9
Ephrin B Signaling	2.63	11
Semaphorin interactions	2.56	10
TGF-β Signaling	2.54	13
Extra-nuclear estrogen signaling	2.54	11
Gαq Signaling	2.53	19
Senescence Pathway	2.5	29
Regulation of Actin-based Motility by Rho	2.45	14
α-Adrenergic Signaling	2.45	14
Apelin Cardiomyocyte Signaling Pathway	2.42	13
p38 MAPK Signaling	2.41	15
Neurotrophin/TRK Signaling	2.4	11
Ribonucleotide Reductase Signaling Pathway	2.39	19
PI3K/AKT Signaling	2.38	21
BMP signaling pathway	2.37	12
Stress Granule Signaling Pathway	2.36	26
Caveolar-mediated Endocytosis Signaling	2.36	11
Apelin Muscle Signaling Pathway	2.26	8
Calcium Signaling	2.26	22
Insulin Receptor Signaling	2.24	15
Myelination Signaling Pathway	2.24	30
ER-Mitochondrial Communication Signaling Pathway	2.23	11
JAK/STAT Signaling	2.19	11
Signaling by VEGF	2.17	13
UVC-Induced MAPK Signaling	2.16	8
HIF1α Signaling	2.14	21
Gap Junction Signaling	2.11	30
Miro GTPase Cycle	2.1	3
ERK5 Signaling	2.1	10
mTOR Signaling	2.07	23
IL-22 Signaling	2.02	5
Role of NFAT in Cardiac Hypertrophy	2.02	22
Histone Modification Signaling Pathway	1.98	27
TAK1-dependent IKK and NF-kappa-B activation	1.98	7
Retinoid metabolism and transport	1.98	7
CSDE1 Signaling Pathway	1.91	8
Cyclophilin Signaling Pathway	1.91	23
GPER1 signaling	1.91	12
Glycerophospholipid biosynthesis	1.91	14
Role of MAPK Signaling in Inhibiting the Pathogenesis of Influenza	1.91	10
Metabolism of folate and pterines	1.89	4
TNF signaling	1.87	8
Folate Signaling Pathway	1.87	8
G Beta Gamma Signaling	1.85	14
Relaxin Signaling	1.85	16
ERBB Signaling	1.83	11
Signaling by NTRK1 (TRKA)	1.83	10
Signaling by PDGF	1.83	8
Calcium Transport I	1.81	3
Epithelial Adherens Junction Signaling	1.8	16
Gene and protein expression by JAK-STAT signaling after IL-12 stimulation	1.8	6
HMGB1 Signaling	1.76	16
PPAR Signaling	1.76	12
TWEAK Signaling	1.75	6
iNOS Signaling	1.73	7
PEDF Signaling	1.73	10
Dopamine Receptor Signaling	1.73	9
Adrenomedullin signaling pathway	1.73	19
ISGylation Signaling Pathway	1.73	12
Renin-Angiotensin Signaling	1.72	13
Necroptosis Signaling Pathway	1.71	16
Membrane Repair Signaling Pathway	1.7	12
RAC Signaling	1.67	14
Reelin Signaling in Neurons	1.65	14
STAT3 Pathway	1.62	14
Regulation of the Epithelial Mesenchymal Transition by Growth Factors Pathway	1.61	18
DAG and IP3 signaling	1.6	6
Protein Sorting Signaling Pathway	1.59	17
Ketogenesis	1.58	3
RHO GTPases activate PAKs	1.57	4
Signaling by TGF-beta Receptor Complex	1.52	7
Thrombin signalling through proteinase activated receptors (PARs)	1.51	5
Intrinsic Prothrombin Activation Pathway	1.5	6
Epithelial Membrane Protein Signaling Pathway	1.5	16
Neuregulin Signaling	1.49	12
Sensory processing of sound by outer hair cells of the cochlea	1.48	7
14-3-3-mediated Signaling	1.47	13
Sphingosine-1-phosphate Signaling	1.46	12
Paxillin Signaling	1.46	11
CNTF Signaling	1.45	7
EGF Signaling	1.45	7
Androgen Signaling	1.44	16
Netrin Signaling	1.44	16
RAF-independent MAPK1/3 activation	1.43	4
SNARE Signaling Pathway	1.34	13
Clathrin-mediated Endocytosis Signaling	1.34	18
TCR signaling	1.3	12
Circadian Rhythm Signaling	1.3	22
G alpha (z) signalling events	1.3	6
Ephrin A Signaling	1.3	13
Synaptogenesis Signaling Pathway	1.29	25

## Sheet: Diff Expressed Rho Related
ProteinGroups	ProteinNames	Genes	ProteinDescriptions	FastaFiles	# Total Unique Peptides	CellularComponent	BiologicalProcess	MolecularFunction	Log2FC: SAN / Ventricle	Log2FC: SAN / Atria	Log2FC: Ventricle / Atria	p-value: SAN / Ventricle	p-value: SAN / Atria	p-value: Ventricle / Atria	q-value: SAN / Ventricle	q-value: SAN / Atria	q-value: Ventricle / Atria	Atria_1	Atria_2	Atria_3	Atria_4	Atria_5	Ventricle_1	Ventricle_2	Ventricle_3	Ventricle_4	Ventricle_5	SAN_1	SAN_2	SAN_3	SAN_4	SummedQuantity	Atria_1	Atria_2	Atria_3	Atria_4	Atria_5	Ventricle_1	Ventricle_2	Ventricle_3	Ventricle_4	Ventricle_5	SAN_1	SAN_2	SAN_3	SAN_4
A0A8V0ZTR7	A0A8V0ZTR7_CHICK	ARHGAP1	Rho GTPase activating protein 1	Uniprot_Gallus-gallus(chicken)_Rev+Unrev51565sequences_Jan2024	36				-1.3991	-0.4923	0.9069	0.000358596	0.00909824	0.000448961	0.00207266	0.0116956	0.00231281	18.19	18.37	18.67	18.16	18.29	19.01	19.25	19.25	19.54	19.16	18	17.83	17.78	17.8	6393990	298970	338938	415828	293783	319402	529710	625342	624790	761492	584142	262775	232435	224484	228334
F1P3P3	F1P3P3_CHICK	ARHGDIA	Rho GDP-dissociation inhibitor 1	Uniprot_Gallus-gallus(chicken)_Rev+Unrev51565sequences_Jan2024	18	immunological synapse,nucleus,cytoplasm	Rho protein signal transduction,regulation of protein localization,regulation of catalytic activity,semaphorin-plexin signaling pathway	Rho GDP-dissociation inhibitor activity	-1.9324	-0.6289	1.3036	0.00136012	0.0606859	0.00293069	0.00402108	0.0409671	0.00606345	15.95	16.45	16.68	15.61	16.32	17.48	16.96	17.47	17.72	17.95	16.15	15.4	15.27	15.5	1774663	63334.8	89804	105106	49896.8	81543.4	183171	127758	181699	215814	253466	72609.4	43171.8	39446.6	46375.9
A0A8V0ZHS4;A0A8V0ZQ42	A0A8V0ZHS4_CHICK;A0A8V0ZQ42_CHICK	ARHGAP39L	Rho GTPase-activating protein 39-like;Rho GTPase-activating protein 39	Uniprot_Gallus-gallus(chicken)_Rev+Unrev51565sequences_Jan2024	3	;	;	;	-1.0192	-1.0281	-0.0089	0.0199502	0.00221159	0.971274	0.0191244	0.0052312	0.319279	15.8	15.93	16.07	15.27	15.73	15.68	15.53	15.32	15.7	16.4	15.11	14.63	14.65	14.56	750241	57025.2	62484	68939.5	39383.4	54269.2	52374.4	47264.6	40951.7	53345.5	86423.3	35396.2	25425.9	25674.4	24165.4
F1NLT8	F1NLT8_CHICK	ARHGDIB	Rho GDP dissociation inhibitor beta	Uniprot_Gallus-gallus(chicken)_Rev+Unrev51565sequences_Jan2024	12	cytoplasm	regulation of catalytic activity	Rho GDP-dissociation inhibitor activity	-1.7642	-0.4298	1.3344	0.00614617	0.295877	0.00968668	0.00928097	0.130936	0.0121553	15.36	15.55	16.46	14.84	15.66	16.87	16.38	16.95	16.95	17.62	15.74	14.85	14.91	15.29	1237102	41992.2	47839.4	90339.6	29333.7	51828.4	120190	85036.9	126397	126395	200992	54834.9	29565.9	30828	39972.4
A0A8V0Y1T5	A0A8V0Y1T5_CHICK	RAPGEF2	Rap guanine nucleotide exchange factor 2	Uniprot_Gallus-gallus(chicken)_Rev+Unrev51565sequences_Jan2024	39				-1.0537	-1.0063	0.0474	0.000233665	0.000509486	0.643534	0.00170065	0.00244995	0.235615	14.62	14.7	14.69	14.32	14.43	14.54	14.43	14.54	14.76	14.74	13.62	13.52	13.56	13.51	332890	25255	26677.8	26396.6	20402.8	22017.9	23776.7	22006.3	23868.2	27793.7	27338.8	12601.2	11785.3	12050.3	11653.1
A0A8V0ZYA7	A0A8V0ZYA7_CHICK	ARHGAP31	Rho GTPase activating protein 31	Uniprot_Gallus-gallus(chicken)_Rev+Unrev51565sequences_Jan2024	45				-0.9914	-0.3581	0.6333	0.015631	0.00372246	0.0435675	0.0163255	0.00694214	0.0324509	14.47	14.23	14.14	14.25	14.29	14.58	14.74	14.6	14.98	15.46	13.89	13.98	13.93	13.88	360150	22697.9	19157.6	17996.5	19434.6	20051.5	24560.3	27295.5	24911.1	32342.2	44975.2	15171.9	16107.6	15611.2	15112.4
A0A1D5PSK2	A0A1D5PSK2_CHICK	ARHGAP18	Rho GTPase activating protein 18	Uniprot_Gallus-gallus(chicken)_Rev+Unrev51565sequences_Jan2024	26		signal transduction		-2.0877	-1.4084	0.6792	0.00057008	6.9252e-05	0.00706516	0.00259522	0.000999311	0.0100357	14.04	14.21	14.26	13.96	13.85	14.67	14.53	14.98	15.03	14.45	12.88	12.68	12.63	12.44	281676	16898	18986.7	19584.8	15940.8	14763.4	26149.3	23714.5	32334.1	33443.4	22348.7	7516.45	6550.76	6342.91	5560.48
A0A1D5PK72;Q5ZJ53	A0A1D5PK72_CHICK;Q5ZJ53_CHICK	ARHGAP25;RCJMB04_20k8	Rho GTPase activating protein 25;Rho GTPase-activating protein 25	Uniprot_Gallus-gallus(chicken)_Rev+Unrev51565sequences_Jan2024	22	;	signal transduction,positive regulation of GTPase activity;	GTPase activator activity;	-1.9138	-0.6288	1.285	7.648e-07	0.00535058	1.5485e-06	0.000151531	0.00855021	0.000213319	13.64	13.94	14.07	13.61	13.67	15.13	14.95	15.21	15.13	14.98	13.48	13.12	13.17	12.83	317754	12737.9	15741.6	17150.1	12521.1	13000.6	35859.6	31571.1	37949.2	35766.6	32237.1	11428.7	8876.72	9201.85	7303.66
A0A8V0ZIP5;A0A8V0ZQY0;A0A8V0ZRK0	A0A8V0ZIP5_CHICK;A0A8V0ZQY0_CHICK;A0A8V0ZRK0_CHICK	FAM65A	RHO family interacting cell polarization regulator 1	Uniprot_Gallus-gallus(chicken)_Rev+Unrev51565sequences_Jan2024	27	;;	;;	;;	-0.852	-0.3696	0.4824	0.000527028	0.0567242	0.00951752	0.00248334	0.0390983	0.0120265	13.46	13.67	13.68	13.18	13.09	14.04	13.62	14.11	13.98	13.8	13.33	12.96	12.99	12.97	186654	11268.4	13066.1	13167.4	9286.13	8742.41	16852.9	12602.7	17679.2	16148.9	14294.4	10275.5	7941.7	8124.61	8042.94
A0A8V0YZB3;Q5ZMG8	A0A8V0YZB3_CHICK;Q5ZMG8_CHICK	RHOG2	RHOG family member 2	Uniprot_Gallus-gallus(chicken)_Rev+Unrev51565sequences_Jan2024	3	;intracellular,plasma membrane,cytoskeleton,cytoplasm	;small GTPase mediated signal transduction,engulfment of apoptotic cell,cell migration,Rac protein signal transduction,Rho protein signal transduction,actin filament organization,neuron projection morphogenesis,actin cytoskeleton organization,chemotaxis,cell projection assembly,cell morphogenesis,endocytosis,positive regulation of actin filament polymerization,actin cytoskeleton reorganization	;GTPase activity,GTP binding,protein kinase binding,signal transducer activity	-1.057	-0.7079	0.3491	0.00850596	0.0731813	0.247306	0.0112291	0.0468599	0.114418	13.38	12.45	12.1	13.38	13.17	13.1	12.75	13.41	13.41	13.78	11.94	12.44	12.15	12.5	119834	10634.8	5584.87	4397.66	10638.3	9222.3	8758.39	6907.88	10910.9	10913.4	14067.9	3933.08	5566.99	4532.34	5791.81
A0A8V0YS21	A0A8V0YS21_CHICK	ARHGAP8	Rho GTPase activating protein 8	Uniprot_Gallus-gallus(chicken)_Rev+Unrev51565sequences_Jan2024	10				-2.6716	-1.9504	0.7212	0.000289305	0.00335501	0.00523315	0.00185757	0.00653618	0.00844636	13.12	13.37	13.54	12.61	13.36	13.64	13.7	13.94	14.19	14.19	12.28	12.56	11.65	10.78	160677	8897.16	10552.3	11872.3	6244.39	10478.8	12803.1	13263.9	15690	18718	18726.9	4965.13	6041.97	3216.13	1756.38
A0A8V0X5Q4;A0A8V0X5R2;A0A8V0X8T2;A0A8V0XBI4	A0A8V0X5Q4_CHICK;A0A8V0X5R2_CHICK;A0A8V0X8T2_CHICK;A0A8V0XBI4_CHICK	ARHGEF26	Rho guanine nucleotide exchange factor 26	Uniprot_Gallus-gallus(chicken)_Rev+Unrev51565sequences_Jan2024	12	;;;	;;;	;;;	-1.8049	-1.1711	0.6338	0.00132372	0.000290617	0.0241111	0.00396895	0.00185885	0.0216406	12.74	12.83	12.65	12.4	12.54	13.33	13.26	13.56	13.45	12.57	11.66	11.85	11.06	11.15	103688	6840.82	7285.36	6444.04	5418.52	5949.31	10320.7	9836.77	12111.2	11207.1	6080.79	3244.79	3702.13	2131	2268.71
A0A3Q2UF91;A0A8V1ABP2;A0A8V1ABP7;A0A8V1ABQ2;A0A8V1AGZ1;A0A8V1AGZ6;A0A8V1AH00;A0A8V1AJ27;A0A8V1AMT5;Q5ZMV8	A0A3Q2UF91_CHICK;A0A8V1ABP2_CHICK;A0A8V1ABP7_CHICK;A0A8V1ABQ2_CHICK;A0A8V1AGZ1_CHICK;A0A8V1AGZ6_CHICK;A0A8V1AH00_CHICK;A0A8V1AJ27_CHICK;A0A8V1AMT5_CHICK;RPGP2_CHICK	RAP1GAP2	RAP1 GTPase activating protein 2;RAP1 GTPase activating protein 2;RAP1 GTPase activating protein 2;RAP1 GTPase activating protein 2;RAP1 GTPase activating protein 2;RAP1 GTPase activating protein 2;RAP1 GTPase activating protein 2;RAP1 GTPase activating protein 2;RAP1 GTPase activating protein 2;Rap1 GTPase-activating protein 2	Uniprot_Gallus-gallus(chicken)_Rev+Unrev51565sequences_Jan2024	5	;;;;;;;;;cytoplasm	;;;;;;;;;positive regulation of GTPase activity,regulation of small GTPase mediated signal transduction	;;;;;;;;;GTPase activator activity	-1.6255	-2.2278	-0.6023	0.000620826	5.4103e-06	0.00270031	0.00269134	0.000325468	0.00581583	12.72	12.87	12.99	12.56	12.86	12.39	11.78	12.48	12.33	11.91	11.07	10.79	10.12	10.09	72413	6762.73	7477.11	8129.34	6019.4	7425.01	5379.36	3519.97	5703.02	5140.61	3847.06	2145.82	1765.75	1113.09	1091.72
A0A1D5PAP4;A0A8V0YQV7;A0A8V0YZ51;Q5ZMW5	A0A1D5PAP4_CHICK;A0A8V0YQV7_CHICK;A0A8V0YZ51_CHICK;RHG26_CHICK	ARHGAP26	Rho GTPase-activating protein 26;Rho GTPase-activating protein 26;Rho GTPase activating protein 26;Rho GTPase-activating protein 26	Uniprot_Gallus-gallus(chicken)_Rev+Unrev51565sequences_Jan2024	4	;;;cytoplasm,cytoskeleton,focal adhesion	;;;signal transduction,actin cytoskeleton organization,positive regulation of GTPase activity,regulation of small GTPase mediated signal transduction	;;;GTPase activator activity,phospholipid binding	-0.973	-0.7567	0.2163	0.00275817	0.0210733	0.326997	0.0058794	0.0197891	0.14106	12.51	12.56	12.78	11.8	12.09	12.83	12.08	12.59	12.85	12.55	11.83	11.84	11.12	11.63	79435	5822.5	6051.53	7028.48	3565.78	4352.99	7277	4328.31	6168.92	7378.68	6007.52	3631.18	3673.7	2229.25	3165.37
A0A8V0ZRJ1;A0A8V0ZRK2;A0A8V0ZYU9;A0A8V1A0M9;A0A8V1A0N5;A0A8V1A0P3;A0A8V1A0P9;A0A8V1A476;A0A8V1A484;A0A8V1A494	A0A8V0ZRJ1_CHICK;A0A8V0ZRK2_CHICK;A0A8V0ZYU9_CHICK;A0A8V1A0M9_CHICK;A0A8V1A0N5_CHICK;A0A8V1A0P3_CHICK;A0A8V1A0P9_CHICK;A0A8V1A476_CHICK;A0A8V1A484_CHICK;A0A8V1A494_CHICK	ARHGEF4	Rho guanine nucleotide exchange factor 4	Uniprot_Gallus-gallus(chicken)_Rev+Unrev51565sequences_Jan2024	7	;;;;;;;;;	;;;;;;;;;	;;;;;;;;;	-1.221	-0.7503	0.4707	0.010249	0.00170796	0.103348	0.0125839	0.00452821	0.0601112	12.41	12.14	12.57	12.13	12.19	12.3	12.38	12.75	12.87	13.31	11.84	11.42	11.64	11.22	81287	5436.9	4527.4	6072.42	4478.95	4668.33	5039.24	5318.77	6887.79	7481.71	10173	3656.71	2742.38	3186.01	2392.07
A0A8V0XDQ1	A0A8V0XDQ1_CHICK	ARHGAP6	Rho GTPase activating protein 6	Uniprot_Gallus-gallus(chicken)_Rev+Unrev51565sequences_Jan2024	10				-1.3495	-0.0606	1.2889	0.000799345	0.816955	0.00100591	0.00303691	0.281614	0.00341962	12.02	12.26	12.44	11.86	12.68	13.39	13.4	13.35	13.65	13.97	12.71	12.14	12.1	11.78	115785	4162.88	4889.95	5564.97	3706.59	6584.15	10746.4	10791.8	10424.5	12865.8	16033.5	6694.3	4503.42	4387.95	3521.64
A0A8V0X4C3	A0A8V0X4C3_CHICK	ARHGAP28	Rho GTPase activating protein 28	Uniprot_Gallus-gallus(chicken)_Rev+Unrev51565sequences_Jan2024	13				-1.0782	0.8402	1.9183	0.00156081	0.0146303	0.000565027	0.00431592	0.0156375	0.0025815	11.85	11.71	11.91	11.15	11.4	13.77	13.2	13.67	13.77	13.24	12.8	12.59	12.2	12.22	111494	3701.65	3349.15	3851.36	2275.02	2710.89	13996.5	9418.02	13028.4	13933.9	9678.21	7120.99	6158.91	4712.98	4762.06
A0A8V0YBL6;A0A8V0YIJ2	A0A8V0YBL6_CHICK;A0A8V0YIJ2_CHICK	ARAP3	ArfGAP with RhoGAP domain, ankyrin repeat and PH domain 3;ArfGAP with RhoGAP domain, ankyrin repeat and PH domain 3	Uniprot_Gallus-gallus(chicken)_Rev+Unrev51565sequences_Jan2024	26	;	;	;	-0.6963	0.5807	1.277	5.92962e-05	0.000334597	3.9538e-06	0.000929818	0.00200021	0.000300605	11.53	11.47	11.68	11.23	11.45	12.85	12.69	12.88	12.74	12.61	12.19	12.06	12.04	11.94	74614	2963.2	2838	3271.86	2402.74	2802.36	7373.54	6587.35	7550.93	6848.88	6240.3	4681.91	4261.6	4207.83	3932.07
A0A8V0ZAT5;A0A8V0ZHV7;A0A8V0ZNV1	A0A8V0ZAT5_CHICK;A0A8V0ZHV7_CHICK;A0A8V0ZNV1_CHICK	ARHGAP29	Rho GTPase-activating protein 29	Uniprot_Gallus-gallus(chicken)_Rev+Unrev51565sequences_Jan2024	9	;;	;;	;;	-1.492	-1.0422	0.4498	0.00124366	0.0055136	0.00258902	0.00382022	0.00870378	0.00568323	11.46	11.66	11.59	11.09	11.6	11.88	11.94	12.07	11.78	12.04	10.86	10.21	10.05	10.18	43261	2815.08	3244	3074.97	2179.69	3110.41	3770.76	3922.9	4292.65	3504.91	4210.59	1864.49	1181.3	1060.4	1156.84
A0A8V1A5Z0	A0A8V1A5Z0_CHICK	ALS2	Alsin Rho guanine nucleotide exchange factor ALS2	Uniprot_Gallus-gallus(chicken)_Rev+Unrev51565sequences_Jan2024	13				-1.4649	-1.1728	0.292	0.00276687	0.0181359	0.138024	0.00589065	0.0179603	0.0742949	10.44	10.51	10.39	10.35	10.41	10.75	10.24	10.72	11.13	10.59	9.21	9.97	9.33	7.59	19940	1389.97	1460.68	1341.38	1309	1356.45	1724.66	1208.23	1688.65	2235.13	1539.43	591.97	1005.45	643.33	192.56
A0A8V0Z5P2;A0A8V0ZCK7;Q5ZM83	A0A8V0Z5P2_CHICK;A0A8V0ZCK7_CHICK;MIRO2_CHICK	RHOT2	Mitochondrial Rho GTPase;Ras homolog family member T2;Mitochondrial Rho GTPase 2	Uniprot_Gallus-gallus(chicken)_Rev+Unrev51565sequences_Jan2024	5	;;integral component of mitochondrial outer membrane	;;cellular homeostasis,mitochondrion transport along microtubule,mitochondrial outer membrane permeabilization	;;GTPase activity,calcium ion binding,GTP binding	-1.7872	0.4595	2.2467	0.108001	0.480864	0.0863471	0.119119	0.301336	0.103045	8.56	NA	NA	9.43	NA	NA	11.76	9.65	10.64	12.06	8.26	10.06	8.88	10.09	NA	14145	377.1	NA	NA	691.11	NA	NA	3477.7	804.42	1595.88	4261.24	307.29	1071.16	471.71
A0A8V1A1Y1	A0A8V1A1Y1_CHICK	ARF4	ADP-ribosylation factor 4	Uniprot_Gallus-gallus(chicken)_Rev+Unrev51565sequences_Jan2024	9				-1.4047	-0.6475	0.7572	2.11867e-05	0.00940051	4.24461e-05	0.00151978	0.0270913	0.00208252	17.64	17.69	17.87	17.27	17.61	18.44	18.33	18.25	18.48	18.42	17.28	17.14	17.18	16.99	17.64	3790169	204656	211995	239851	158547	199895	356011	329808	312721	365890	350996	159280	144746	148231
E1BQI2	E1BQI2_CHICK	RAP2A	small monomeric GTPase	Uniprot_Gallus-gallus(chicken)_Rev+Unrev51565sequences_Jan2024	2	cytosol,plasma membrane,recycling endosome membrane	microvillus assembly,negative regulation of cell migration,actin cytoskeleton reorganization,positive regulation of protein autophosphorylation,Rap protein signal transduction,cellular response to drug,establishment of protein localization,regulation of JNK cascade,regulation of dendrite morphogenesis,protein localization to plasma membrane	magnesium ion binding,GTPase activity,GTP binding,GDP binding	-1.3001	NA	NA	0.0344652	NA	NA	0.0578125	NA	NA	NA	NA	NA	9.79	NA	11.95	11.89	11.21	12.03	12.85	10.99	10.96	10.62	10.49	10.13	31212	NA	NA	NA	884.07	NA	3945.34	3805.11	2361.03	4175.19	7385.11	2035.13	1995.42	1575.1
A0A8V0YRT2;A0A8V0YY71	A0A8V0YRT2_CHICK;A0A8V0YY71_CHICK	TBC1D9B	TBC1 domain family member 9B	Uniprot_Gallus-gallus(chicken)_Rev+Unrev51565sequences_Jan2024	23	;	;	;	-1.1036	-0.8932	0.2104	3.35283e-05	0.000188489	0.0511579	0.00188236	0.00409498	0.0740273	16.52	16.68	16.7	16.46	16.37	16.64	16.65	16.93	16.89	16.67	16.03	15.65	15.82	15.17	16.05	1435960	94257.4	105236	106507	89963.4	84647.2	102061	102967	125246	121342	104467	67086.4	51556.7	57695.1
A0A8V0XUY7;A0A8V0XUZ3;Q9YGW6	A0A8V0XUY7_CHICK;A0A8V0XUZ3_CHICK;Q9YGW6_CHICK	EZR	Ezrin	Uniprot_Gallus-gallus(chicken)_Rev+Unrev51565sequences_Jan2024	42	;;actin filament,actin cytoskeleton,extrinsic component of membrane	;;actin filament bundle assembly	;;cell adhesion molecule binding,actin filament binding	-1.6146	-0.3622	1.2524	0.000384491	0.343724	0.000918071	0.00561388	0.247991	0.00844195	16.94	17.16	17.2	16.68	16.99	18.26	17.76	18.32	18.46	18.4	16.36	16.03	16.18	16.25	17.44	3103891	125411	146780	150763	105083	130305	313333	222335	326957	360876	344889	84331.3	67083.3	74475.3
Q5ZHV1	RB33B_CHICK	RAB33B	Ras-related protein Rab-33B	Uniprot_Gallus-gallus(chicken)_Rev+Unrev51565sequences_Jan2024	2	Golgi membrane,Golgi lumen,endomembrane system	autophagosome assembly,intra-Golgi vesicle-mediated transport,protein transport,protein localization to Golgi apparatus,skeletal system morphogenesis,regulation of Golgi organization,negative regulation of constitutive secretory pathway,regulation of retrograde vesicle-mediated transport, Golgi to ER,regulation of autophagosome assembly,Rab protein signal transduction,intracellular protein transp…	GTPase activity,GTP binding	-2.5037	-0.3049	2.1988	0.0100165	0.820811	0.00989219	0.0281072	0.41685	0.0278887	11.14	10.46	9.45	4.37	12.41	13.19	11.88	13.81	12.99	13.21	9.41	12.39	7.52	6.96	10.41	63861	2262.32	1405.85	697.24	20.61	5437.17	9373.04	3776.17	14337.1	8117.64	9494.13	679.99	5373.64	182.96
A0A8V0ZPT2;A0A8V0ZYN9;E1BSW6	A0A8V0ZPT2_CHICK;A0A8V0ZYN9_CHICK;E1BSW6_CHICK	PLEKHF1	Pleckstrin homology and FYVE domain containing 1	Uniprot_Gallus-gallus(chicken)_Rev+Unrev51565sequences_Jan2024	8	;;lysosome,endosome,autophagosome,endoplasmic reticulum,extrinsic component of omegasome membrane,ER-mitochondrion membrane contact site,pre-autophagosomal structure,vacuolar membrane,membrane	;;endosome organization,positive regulation of autophagy,protein localization to plasma membrane,positive regulation of intrinsic apoptotic signaling pathway,cellular response to starvation,negative regulation of phosphatase activity,macroautophagy	;;phosphatidylinositol-5-phosphate binding,phosphatidylinositol-3-phosphate binding,metal ion binding,phosphatidylinositol-4-phosphate binding,phosphatidylinositol binding	-1.9886	-0.4095	1.5791	0.0023681	0.0709235	0.00329405	0.0135949	0.0909015	0.0160221	12.26	12.37	12.52	11.64	12.37	13.67	13.42	13.64	13.96	14.33	12.15	11.56	11.7	11.92	12.91	127466	4889.7	5289.07	5888.71	3186.3	5282.87	13060.3	10975.5	12761.1	15914.8	20600.6	4543.4	3024.62	3334.98
A0A8V0XQ56;A0A8V0XS83;P49702	A0A8V0XQ56_CHICK;A0A8V0XS83_CHICK;ARF5_CHICK	ARF5	ADP-ribosylation factor;ADP-ribosylation factor;ADP-ribosylation factor 5	Uniprot_Gallus-gallus(chicken)_Rev+Unrev51565sequences_Jan2024	9	;;cytoplasm,Golgi apparatus,plasma membrane	;;protein transport,vesicle-mediated transport	;;GTP binding	-1.3513	-0.465	0.8863	9.6415e-06	0.0309935	6.87582e-05	0.00116681	0.0542229	0.0026102	16.26	16.52	16.72	16.11	16.46	17.34	17.15	17.28	17.53	17.24	16.29	16.07	16.11	15.87	16.22	1724888	78274.4	93719.8	108139	70782.2	90051.2	166056	145506	159478	189467	154611	79926.3	68788.6	70506.8
A0A1D5PIQ5	A0A1D5PIQ5_CHICK	MAPK14	mitogen-activated protein kinase	Uniprot_Gallus-gallus(chicken)_Rev+Unrev51565sequences_Jan2024	20	intracellular	MAPK cascade	MAP kinase activity,ATP binding	-1.0965	-0.3927	0.7038	0.00121943	0.198741	0.00870602	0.00972955	0.176348	0.0260335	14.22	14.53	14.91	13.96	14.1	15.01	14.61	15.14	15.36	15.22	14.61	13.84	13.85	14.05	14.4	407931	19092.9	23593	30778.8	15949.2	17590.9	33060.6	25074.9	36065.2	41942.5	38145.4	25057.7	14661.2	14817.3
A0A3Q2TWA5;A0A3Q2U3C8;A0A3Q2U522;A0A8V1AA16	A0A3Q2TWA5_CHICK;A0A3Q2U3C8_CHICK;A0A3Q2U522_CHICK;A0A8V1AA16_CHICK	GARNL3	GTPase activating Rap/RanGAP domain like 3	Uniprot_Gallus-gallus(chicken)_Rev+Unrev51565sequences_Jan2024	7	;;;	;;;	;;;	-1.443	-0.6211	0.8219	0.0339365	0.361164	0.000937055	0.0573986	0.255754	0.00848668	10.15	10.65	10.72	9.91	10.83	11.38	11.07	11.5	11.38	11.2	9.93	9.23	0.24	11.08	8.63	25270	1136.38	1609.91	1681.3	961.44	1819.49	2660.95	2156.65	2903.4	2664.45	2357.45	978.71	601.14	1.18
A0A452J806;A0A8V1ADS0;Q5ZM25	A0A452J806_CHICK;A0A8V1ADS0_CHICK;OLA1_CHICK	OLA1	Obg-like ATPase 1	Uniprot_Gallus-gallus(chicken)_Rev+Unrev51565sequences_Jan2024	28	;;nucleolus,cytoplasm	;;	;;ATP binding,GTP binding,ATPase activity,metal ion binding	-1.6206	-0.9807	0.6399	0.00028622	0.00593262	0.0104426	0.00492787	0.0212365	0.0286521	16.44	17.02	17.21	16.5	16.93	17.56	17.06	17.4	17.82	17.51	16.33	15.82	16.08	15.97	16.84	2049532	88607.2	133223	151669	92381	124717	192992	136558	173098	231261	186352	82431.5	58038.6	69499.9
A0A3Q2U511;A0A8V0Z375;A0A8V0Z379;A0A8V0Z384;A0A8V0ZAL6	A0A3Q2U511_CHICK;A0A8V0Z375_CHICK;A0A8V0Z379_CHICK;A0A8V0Z384_CHICK;A0A8V0ZAL6_CHICK	CYTH3	Cytohesin 3	Uniprot_Gallus-gallus(chicken)_Rev+Unrev51565sequences_Jan2024	9	;;;;	;;;;	;;;;	-1.0999	-0.3449	0.755	0.00019517	0.0792425	0.00167089	0.00418347	0.0974407	0.011384	14.77	15.01	14.88	14.75	14.81	15.74	15.31	15.69	15.77	15.44	14.58	14.67	14.66	14.72	15	578595	27902.3	32928.3	30084.2	27571.5	28712.6	54717.2	40535	52756.7	55969	44436.6	24430.1	26055	25902.5
A0A8V0Y1I7	A0A8V0Y1I7_CHICK	GARRE1	Granule associated Rac and RHOG effector 1	Uniprot_Gallus-gallus(chicken)_Rev+Unrev51565sequences_Jan2024	15				-1.0958	0.1812	1.277	0.0380323	0.304031	0.0266023	0.061412	0.230208	0.0494019	12	11.44	11.19	11.92	11.96	12.49	12.86	12.66	12.93	13.76	11.76	12.06	12.01	11.82	12.03	82641	4099.62	2783.63	2329.2	3872.09	3972.12	5758.58	7449.21	6454.37	7781.15	13891.1	3478.4	4266.08	4116.64
A0A8V1ADR9	A0A8V1ADR9_CHICK	MAP2K4	mitogen-activated protein kinase kinase	Uniprot_Gallus-gallus(chicken)_Rev+Unrev51565sequences_Jan2024	16				-1.2929	-0.7973	0.4956	0.00206658	0.0399845	0.0145947	0.0127662	0.0633676	0.0345325	14.14	14.3	14.47	13.9	14.01	14.42	14.46	14.78	14.99	14.64	14.05	13.73	13.62	13.14	14.2	313995	18079.6	20153.9	22622.6	15279.9	16548.6	21910.5	22545.3	28054	32615.9	25549.6	16966.7	13543	12614.2
A0A8V0Z7M5;A0A8V0ZDF6	A0A8V0Z7M5_CHICK;A0A8V0ZDF6_CHICK	MAPK8	Stress-activated protein kinase JNK	Uniprot_Gallus-gallus(chicken)_Rev+Unrev51565sequences_Jan2024	15	;	;	;	-1.0572	-0.554	0.5032	0.00369476	0.0877453	0.0137449	0.0170207	0.104128	0.0333346	14.2	14.34	14.35	13.83	14.18	14.69	14.29	14.79	14.98	14.64	14.09	13.66	13.86	13.95	14.15	328007	18868.2	20775.3	20810.9	14557.5	18575.3	26452.5	19965.4	28243.6	32370.7	25611.5	17469.5	12932.2	14905.6
A0A8V0YZ22;A0A8V0Z568;A0A8V0Z5S5;A0A8V0ZCS4	A0A8V0YZ22_CHICK;A0A8V0Z568_CHICK;A0A8V0Z5S5_CHICK;A0A8V0ZCS4_CHICK	ACAP3	Arf-GAP with coiled-coil, ANK repeat and PH domain-containing protein;Arf-GAP with coiled-coil, ANK repeat and PH domain-containing protein;Arf-GAP with coiled-coil, ANK repeat and PH domain-containing protein;Arf-GAP with coiled-coil, ANK repeat and PH domain-containing protein	Uniprot_Gallus-gallus(chicken)_Rev+Unrev51565sequences_Jan2024	2	;;;	;;;	;;;	NA	NA	0.9654	NA	NA	0.0390605	NA	NA	0.0624253	10.7	12.2	12.22	NA	10.94	13.02	NA	12.62	12.7	12.06	11.09	NA	NA	NA	NA	45562	1659.24	4691.56	4763.31	NA	1970.89	8324.67	NA	6291.98	6662.13	4271.61	2186.01	NA	NA
A0A8V1AAM3;A0A8V1ADF0	A0A8V1AAM3_CHICK;A0A8V1ADF0_CHICK	MAP2K2	Dual specificity mitogen-activated protein kinase kinase 2	Uniprot_Gallus-gallus(chicken)_Rev+Unrev51565sequences_Jan2024	19	;	;	;	-2.2073	-0.9847	1.2227	1.50755e-05	0.00986725	0.000139572	0.001351	0.0278619	0.00357774	14.89	15.12	15.34	14.47	14.93	16.27	15.88	16.29	16.42	16.08	14.54	14.18	14.15	14.14	15.17	692582	30302.1	35553.4	41361.1	22713.6	31115.5	78967.2	60132.8	79957.4	87489.2	69294.8	23842.8	18614.9	18124.5
A0A8V0YCC0;A0A8V0YEJ5	A0A8V0YCC0_CHICK;A0A8V0YEJ5_CHICK	FGD6	FYVE, RhoGEF and PH domain containing 6;FYVE, RhoGEF and PH domain containing 6	Uniprot_Gallus-gallus(chicken)_Rev+Unrev51565sequences_Jan2024	14	;	;	;	-1.0593	-0.4364	0.6229	0.0228795	0.324534	0.0329739	0.0450742	0.239465	0.0563214	11.47	12.08	12.05	11.49	11.65	12.05	12.05	12.22	12.68	12.79	10.94	10.88	11.19	10.17	11.86	64562	2833.96	4337.32	4249.68	2866.97	3212.41	4227.76	4253.7	4782.92	6582.06	7102.98	1966.9	1889.61	2329.75
A0A8V0Z5Y8	A0A8V0Z5Y8_CHICK	GNA12	G protein subunit alpha 12	Uniprot_Gallus-gallus(chicken)_Rev+Unrev51565sequences_Jan2024	4				-1.1773	-0.8546	0.3227	0.000106327	0.0015637	0.00724843	0.00315452	0.0110014	0.0235881	13.17	13.4	13.24	13.16	13.06	13.58	13.6	13.34	13.7	13.42	12.73	12.43	12.13	12.02	12.8	141807	9207.49	10796.1	9690.84	9123.01	8542.57	12206	12399.4	10353.1	13277.4	10994.5	6810.27	5502.79	4477.31
A0A8V0Y2V7;A0A8V0Y4K1	A0A8V0Y2V7_CHICK;A0A8V0Y4K1_CHICK	RND3	Rho family GTPase 3;Rho-related GTP-binding protein RhoE	Uniprot_Gallus-gallus(chicken)_Rev+Unrev51565sequences_Jan2024	3	;	;	;	NA	NA	0.9969	NA	NA	0.000165821	NA	NA	0.00388843	11.9	11.03	11.97	11.74	12.1	12.88	12.61	12.73	12.87	12.83	11.2	NA	NA	NA	11.55	61529	3813.04	2089.66	4021.88	3414.03	4384.89	7531.33	6264.43	6781.14	7507.31	7286.58	2348.09	NA	NA
A0A8V0X039;A0A8V0X2X2;A0A8V0X583;A0A8V0X787	A0A8V0X039_CHICK;A0A8V0X2X2_CHICK;A0A8V0X583_CHICK;A0A8V0X787_CHICK	LOC107049485	G protein nucleolar 3 like	Uniprot_Gallus-gallus(chicken)_Rev+Unrev51565sequences_Jan2024	16	;;;	;;;	;;;	-1.983	-0.9537	1.0293	4.58381e-05	7.44716e-05	0.000433624	0.00216498	0.00268888	0.00585262	12.75	12.82	12.8	12.61	12.75	13.89	13.49	13.74	13.95	13.78	11.73	12.02	11.86	11.52	12.84	134106	6898.35	7220.04	7125.88	6266.79	6894.51	15203.3	11500.5	13707.7	15774	14036.3	3393.16	4154.33	3720.34
A0A1L1RMP9;A0A8V0Y5Y9;E1BVB0	A0A1L1RMP9_CHICK;A0A8V0Y5Y9_CHICK;E1BVB0_CHICK	ARL1	ADP-ribosylation factor-like protein 1	Uniprot_Gallus-gallus(chicken)_Rev+Unrev51565sequences_Jan2024	6	;;cytoplasm,Golgi apparatus,trans-Golgi network,cytosol	;;Golgi organization,toxin metabolic process,activation of phospholipase D activity,protein localization to Golgi apparatus,retrograde transport, endosome to Golgi	;;GTPase activity,GTP binding,enzyme activator activity,protein domain specific binding	-1.8947	-0.8874	1.0074	2.11e-08	0.000887097	2.53152e-05	9.5126e-05	0.00830105	0.00166835	12.83	13.01	12.97	12.58	12.51	13.84	13.82	13.79	13.73	13.83	12.04	11.83	12.18	11.92	12.68	140395	7284.85	8258.1	8010.49	6124.59	5826.46	14680	14437.1	14135.5	13560.6	14558.7	4216.39	3631.85	4649.03
A0A8V0Z6G2;A0A8V0Z6H0;E1BWT7	A0A8V0Z6G2_CHICK;A0A8V0Z6H0_CHICK;E1BWT7_CHICK	ECT2	Epithelial cell transforming 2	Uniprot_Gallus-gallus(chicken)_Rev+Unrev51565sequences_Jan2024	4	;;nucleus,cytoplasm	;;cell morphogenesis,cytokinesis,regulation of Rho protein signal transduction,intracellular signal transduction,positive regulation of GTPase activity,positive regulation of neuron differentiation	;;Rho guanyl-nucleotide exchange factor activity,GTPase activator activity	-1.1627	-0.7201	0.4426	0.0181153	0.192804	0.274879	0.0392001	0.172935	0.216032	9.63	10.55	11.6	10.3	10.7	11.49	10.03	11.35	11.06	11.37	9.81	10.47	9.48	NA	8.85	24106	791.73	1497.92	3110.89	1259.8	1659.59	2874.84	1047.82	2604.73	2137.95	2641.75	900.76	1414.52	715.01
A0A8V0ZIP5;A0A8V0ZQY0;A0A8V0ZRK0	A0A8V0ZIP5_CHICK;A0A8V0ZQY0_CHICK;A0A8V0ZRK0_CHICK	FAM65A	RHO family interacting cell polarization regulator 1	Uniprot_Gallus-gallus(chicken)_Rev+Unrev51565sequences_Jan2024	27	;;	;;	;;	-1.0261	-0.5502	0.4759	0.000660492	0.04269	0.010676	0.00720708	0.0660988	0.0289879	13.48	13.68	13.7	13.18	13.09	14.02	13.64	14.13	13.99	13.79	13.33	12.98	12.98	13	13.17	191116	11419	13156.7	13297.1	9288.61	8715.04	16577.5	12762.9	17896	16272.4	14205.2	10275.5	8087.28	8086.78
A0A3Q2TWA5;A0A3Q2U3C8;A0A3Q2U522;A0A8V1AA16	A0A3Q2TWA5_CHICK;A0A3Q2U3C8_CHICK;A0A3Q2U522_CHICK;A0A8V1AA16_CHICK	GARNL3	GTPase activating Rap/RanGAP domain like 3	Uniprot_Gallus-gallus(chicken)_Rev+Unrev51565sequences_Jan2024	7	;;;	;;;	;;;	-1.443	-0.6211	0.8219	0.0339365	0.361164	0.000937055	0.0573986	0.255754	0.00848668	10.15	10.65	10.72	9.91	10.83	11.38	11.07	11.5	11.38	11.2	9.93	9.23	0.24	11.08	8.63	25270	1136.38	1609.91	1681.3	961.44	1819.49	2660.95	2156.65	2903.4	2664.45	2357.45	978.71	601.14	1.18
A0A8V0X5Q4;A0A8V0X5R2;A0A8V0X8T2;A0A8V0XBI4	A0A8V0X5Q4_CHICK;A0A8V0X5R2_CHICK;A0A8V0X8T2_CHICK;A0A8V0XBI4_CHICK	ARHGEF26	Rho guanine nucleotide exchange factor 26	Uniprot_Gallus-gallus(chicken)_Rev+Unrev51565sequences_Jan2024	12	;;;	;;;	;;;	-1.3296	-0.6598	0.6699	0.00539863	0.130738	0.0180675	0.0203844	0.134572	0.0391386	12.68	12.73	12.56	12.26	12.45	13.31	13.2	13.51	13.35	12.54	11.58	11.77	10.97	11.06	12.36	106234	6570.76	6771.68	6054.62	4920.64	5598.51	10148.3	9411.32	11636.8	10448.9	5949.31	3053.46	3483.84	2005.35
A0A1D5PML9	A0A1D5PML9_CHICK	TIAM2	T-cell lymphoma invasion and metastasis 2	Uniprot_Gallus-gallus(chicken)_Rev+Unrev51565sequences_Jan2024	7	intracellular	regulation of Rho protein signal transduction,intracellular signal transduction,regulation of molecular function	receptor signaling protein activity,Rho guanyl-nucleotide exchange factor activity	-1.0401	0.2244	1.2645	0.00736214	0.510421	2.6258e-05	0.02374	0.31175	0.00169708	11.43	11.55	11.98	11.09	11.9	13.01	12.83	12.83	12.9	12.87	12.14	NA	11.72	10.95	11.93	77119	2767.12	3000.84	4038.03	2178.43	3832.38	8261.11	7299.91	7287.34	7656.7	7493.04	4514.75	NA	3366.61
A0A1D5PHN6;A0A8V1ACY9;A0A8V1AIA8;A0A8V1AM65;F1NVF2	A0A1D5PHN6_CHICK;A0A8V1ACY9_CHICK;A0A8V1AIA8_CHICK;A0A8V1AM65_CHICK;F1NVF2_CHICK	MAP2K6	mitogen-activated protein kinase kinase	Uniprot_Gallus-gallus(chicken)_Rev+Unrev51565sequences_Jan2024	21	;;;;nucleus,cytoplasm,cytosol	;;;;MAPK cascade,activation of MAPK activity,regulation of mitotic cell cycle,signal transduction by protein phosphorylation,stress-activated protein kinase signaling cascade,activation of protein kinase activity,regulation of apoptotic process,cardiac muscle contraction	;;;;protein serine/threonine kinase activity,MAP kinase kinase activity,ATP binding,protein kinase binding	-1.6384	-0.8847	0.7537	0.000207494	0.0119644	0.00440757	0.00428418	0.0308555	0.0184231	14.18	14.61	14.72	13.88	14.27	15.05	14.83	15.17	15.48	14.96	14	13.57	13.69	13.49	14.22	382017	18597.3	25020.9	26929.7	15102.8	19746.8	33923.4	29175.1	36922.9	45821	31867.3	16328.2	12177.4	13230.4
A0A8V0X6L6	A0A8V0X6L6_CHICK	TBC1D10A	TBC1 domain family member 10A	Uniprot_Gallus-gallus(chicken)_Rev+Unrev51565sequences_Jan2024	15				0.2006	0.5007	0.3	0.162223	0.0166353	0.0847583	0.154821	0.0372888	0.101803	13.87	13.97	14.38	13.65	13.73	14.41	14.1	14.34	14.33	13.98	14.66	14.21	14.39	14.47	14.1	300772	14991.4	16004.4	21249.4	12897.4	13571.8	21840.1	17590.7	20676.5	20637.1	16167	25949.5	18951.5	21426
A0A8V0ZM60;A0A8V0ZZY9;A0A8V0ZZZ3	A0A8V0ZM60_CHICK;A0A8V0ZZY9_CHICK;A0A8V0ZZZ3_CHICK	RACGAP1	Rac GTPase activating protein 1	Uniprot_Gallus-gallus(chicken)_Rev+Unrev51565sequences_Jan2024	24	;;	;;	;;	-2.2409	-0.6357	1.6052	0.00100166	0.00356799	0.00176294	0.00876793	0.0166824	0.0117581	14.27	13.88	13.76	14.22	14.15	15.69	15.74	15.28	15.45	16.09	13.49	13.68	13.56	13.44	14.64	454744	19774.1	15125.1	13888.9	19062.2	18129.8	52917.8	54636.5	39888	44616	69520.4	11534.8	13110.3	12065.5
A0A3Q2UEH0;A0A8V1A6I7;A0A8V1A6J2;A0A8V1A6J6;A0A8V1ABE1;A0A8V1ABE5;A0A8V1AE75;A0A8V1AGR2;A0A8V1AIK4;F1P1C3	A0A3Q2UEH0_CHICK;A0A8V1A6I7_CHICK;A0A8V1A6J2_CHICK;A0A8V1A6J6_CHICK;A0A8V1ABE1_CHICK;A0A8V1ABE5_CHICK;A0A8V1AE75_CHICK;A0A8V1AGR2_CHICK;A0A8V1AIK4_CHICK;F1P1C3_CHICK	IQSEC1	IQ motif and Sec7 domain ArfGEF 1	Uniprot_Gallus-gallus(chicken)_Rev+Unrev51565sequences_Jan2024	21	;;;;;;;;;nucleolus	;;;;;;;;;actin cytoskeleton organization,regulation of ARF protein signal transduction,positive regulation of GTPase activity	;;;;;;;;;ARF guanyl-nucleotide exchange factor activity	-0.6314	0.0848	0.7162	0.000191112	0.431204	0.000100541	0.00413941	0.283368	0.00308827	13.41	13.14	13.06	13.42	13.44	13.89	14.1	13.94	13.94	14.2	13.23	13.33	13.44	13.3	13.31	207141	10919.6	9036.72	8551.07	10944.7	11081.1	15149.1	17516.2	15726.2	15763.5	18863.2	9609.35	10273.6	11142
A0A8V0ZJ09;A0A8V0ZJ14	A0A8V0ZJ09_CHICK;A0A8V0ZJ14_CHICK	PLEKHG4	Pleckstrin homology and RhoGEF domain containing G4	Uniprot_Gallus-gallus(chicken)_Rev+Unrev51565sequences_Jan2024	22	;	;	;	-0.6328	-1.0085	-0.3757	0.00754082	0.000157442	0.0209762	0.0104224	0.00140626	0.0197202	12.91	12.88	12.52	12.7	12.94	12.35	12.1	12.33	12.5	12.76	11.61	11.93	12.03	11.52	87022	7702.25	7554.55	5861.06	6650.72	7873.07	5227.65	4379.66	5145.82	5791.96	6925.67	3128.85	3913.84	4189.57	2940.82
