# Supplementary material for: Biomechanical Isolation is Required for Maintenance of the Cardiac Pacemaker Cell Fate
Source: Research Square preprint supplement (doi:10.21203/rs.3.rs-9520289/v1), 2026-05-04
Supplement: Supplementary file 3 [file ae12b8567254cbe10aa7ae2d.xlsx]

## Sheet: t=0 SAN v Atria Diff RNA (All)
geneID	log2FC	AveExpr	t	P.Value	adj.P.Val	B
HOXA5	-7.61783	0.60029	-8.29527	2.22319e-08	6.22043e-07	8.96715
HOXA4	-6.61976	1.47648	-11.1698	8.69772e-11	7.85628e-09	14.2051
SHOX2	-6.25068	4.65309	-16.4406	3.06375e-14	1.83795e-11	22.5498
CXCL14	-6.22086	0.440966	-3.9524	0.00062941	0.00314401	-0.276388
HOXA3	-5.98341	2.06964	-12.0438	1.95121e-11	2.52498e-09	15.9125
STAC	-5.63026	0.928607	-6.49989	1.21852e-06	1.66223e-05	5.4384
CHRDL1	-5.62181	2.18494	-9.11339	4.13023e-09	1.54084e-07	11.0527
LUM	-5.55632	3.8548	-8.64226	1.07715e-08	3.37063e-07	10.0492
OSR1	-5.52205	1.50794	-7.8119	6.26576e-08	1.43858e-06	8.32494
DLL1	-5.49727	0.711501	-15.8819	6.39608e-14	2.94291e-11	20.2042
SLC35F3	-5.42524	2.14996	-11.983	2.15957e-11	2.70993e-09	15.8337
SYPL1	-5.28466	1.29935	-13.402	2.22732e-12	4.85439e-10	18.1056
MOXD1	-4.95123	2.12378	-8.70311	9.50157e-09	3.05798e-07	10.2113
HOXA2	-4.86081	1.36417	-10.3638	3.71836e-10	2.36888e-08	13.293
PI15	-4.71306	2.61476	-7.72766	7.52984e-08	1.6381e-06	8.11347
MGAM	-4.60975	2.05812	-11.9104	2.43869e-11	2.94134e-09	15.9066
PRRX2	-4.59015	2.25579	-7.60672	9.81933e-08	2.07458e-06	7.95937
TRABD2A	-4.51097	2.8023	-10.5185	2.7971e-10	1.98276e-08	13.6968
ADIPOQ	-4.45331	1.65579	-8.32879	2.07146e-08	5.82066e-07	9.27622
ALX1	-4.41722	0.572138	-9.80492	1.06495e-09	5.08842e-08	12.3651
PPP1R17	-4.27345	0.973317	-11.3907	5.91521e-11	5.93509e-09	15.1824
MSX2	-4.24573	2.61813	-7.03342	3.54862e-07	6.02248e-06	6.71818
RASSF9	-4.13306	2.28083	-9.94405	8.16646e-10	4.22716e-08	12.6273
BMP2	-4.12792	5.82617	-17.967	4.55063e-15	4.03803e-12	24.5946
PRKAR2B	-4.10299	3.32437	-20.1079	3.93023e-16	1.22063e-12	26.5681
ABRA	-4.10105	2.39308	-6.93215	4.47264e-07	7.20669e-06	6.47185
CRABP1	-4.09756	1.41407	-2.36149	0.0270106	0.0678844	-4.09196
CNTN5	-4.08066	0.784112	-10.9654	1.24836e-10	1.01007e-08	14.1322
EYA4	-4.05803	1.58628	-10.9804	1.21563e-10	1.00012e-08	14.4189
CACNA2D4	-4.02391	0.0696135	-5.89588	5.13011e-06	5.52744e-05	4.17713
SCTR	-3.91711	1.2242	-4.7249	9.15597e-05	0.000630184	1.34929
MAP7	-3.86005	1.20765	-7.46993	1.32896e-07	2.62475e-06	7.68217
ALOX5	-3.85872	3.58663	-12.7641	6.03878e-12	1.05662e-09	17.4332
MEOX2	-3.85864	1.82231	-14.1111	7.67051e-13	2.07154e-10	19.244
NCS1	-3.84685	5.5482	-22.2722	4.14642e-17	2.57555e-13	29.1989
CA4	-3.79907	1.9729	-6.17513	2.62598e-06	3.15803e-05	4.80137
TNMD	-3.71196	0.970998	-16.5029	2.82623e-14	1.83795e-11	22.018
TNC	-3.66404	4.49827	-6.27239	2.08387e-06	2.59138e-05	4.86025
AQP5	-3.66304	0.932633	-6.52228	1.15623e-06	1.58893e-05	5.59214
SEMA5A	-3.57695	2.90154	-12.0811	1.83387e-11	2.43532e-09	16.3765
SLC6A4	-3.57429	3.05252	-6.34442	1.75711e-06	2.25502e-05	5.12616
PAH	-3.54378	1.83898	-8.28704	2.26218e-08	6.31399e-07	9.35031
SOD3	-3.51957	4.96801	-12.0693	1.87025e-11	2.4457e-09	16.2827
SLN	-3.48055	5.09672	-10.4541	3.14783e-10	2.14809e-08	13.3537
HCN4	-3.46768	3.60188	-19.3526	9.07154e-16	2.0295e-12	26.1433
MSC	-3.43051	2.41441	-8.76159	8.4264e-09	2.7915e-07	10.308
NEFM	-3.42953	2.58971	-10.2735	4.39629e-10	2.70372e-08	13.2427
VWF	-3.41445	4.18914	-10.5698	2.54695e-10	1.87052e-08	13.7061
ADGRB1	-3.41108	0.717925	-13.2085	3.00252e-12	6.21671e-10	17.6509
ACTBL2	-3.40868	1.71063	-6.87634	5.08378e-07	7.96416e-06	6.36789
NTRK3	-3.40519	1.21973	-10.4233	3.33181e-10	2.19e-08	13.2917
HOXB4	-3.39617	4.24545	-11.369	6.1421e-11	6.00813e-09	15.1318
MYO7B	-3.38722	2.13126	-6.1838	2.57232e-06	3.10553e-05	4.81067
LHX6	-3.38216	0.069081	-10.993	1.18873e-10	9.91111e-09	14.3628
MMRN1	-3.37139	1.50683	-9.75836	1.16451e-09	5.45912e-08	12.2963
PCDH10	-3.34257	0.761279	-10.3978	3.49196e-10	2.27124e-08	13.1295
LMO1	-3.33941	0.585257	-10.9752	1.22688e-10	1.00273e-08	14.1885
ADAMTS18	-3.29294	0.507553	-11.5507	4.48914e-11	4.84944e-09	15.3689
PRRX1	-3.2453	3.10974	-8.38352	1.84622e-08	5.3463e-07	9.56508
OGN	-3.22371	3.77091	-11.0601	1.0553e-10	8.97941e-09	14.5666
CCDC3	-3.20858	0.789643	-7.50615	1.22633e-07	2.48034e-06	7.75804
PITX2	-3.19588	1.2542	-3.38687	0.00252827	0.0100637	-1.91595
TRPC4	-3.18062	1.45212	-6.87229	5.1313e-07	8.01863e-06	6.37972
ROPN1L	-3.17526	1.32615	-11.7959	2.95702e-11	3.46558e-09	15.5343
FABP5	-3.16789	4.22027	-9.40153	2.33083e-09	9.84896e-08	11.5055
PCDH8	-3.15468	3.42843	-10.8436	1.55182e-10	1.22791e-08	14.2759
CHODL	-3.13173	0.960598	-8.71195	9.33039e-09	3.01853e-07	10.2616
SLC18A3	-3.11532	2.38683	-9.86198	9.54813e-10	4.6884e-08	12.4703
IL8L1	-3.11409	0.705107	-4.82741	7.09082e-05	0.000508893	1.63645
CA8	-3.1033	0.424915	-13.5622	1.74392e-12	4.01198e-10	18.3408
SLCO2A1	-3.09367	2.91314	-8.81932	7.48767e-09	2.54151e-07	10.4763
FAM167A	-3.07378	0.78139	-14.2722	6.05663e-13	1.79146e-10	19.3641
CRISPLD1	-3.04015	3.9957	-16.3644	3.38328e-14	1.83795e-11	22.613
MAB21L1	-3.03549	0.41344	-7.02909	3.58384e-07	6.04099e-06	6.68478
SNTG1	-2.96505	1.02394	-11.3899	5.9241e-11	5.93509e-09	15.0302
PAPPA2	-2.9558	0.582959	-6.78861	6.2227e-07	9.42386e-06	6.19469
APCDD1L	-2.94724	4.66219	-19.284	9.80197e-16	2.0295e-12	26.1142
RGS8	-2.90833	0.923998	-6.89511	4.86927e-07	7.67652e-06	6.39907
ACSL6	-2.86874	2.6637	-8.35251	1.97056e-08	5.62765e-07	9.46336
SPINK5	-2.86467	2.70879	-9.69767	1.30892e-09	5.98976e-08	12.0472
HOXB5	-2.85581	1.82573	-6.18123	2.58809e-06	3.12154e-05	4.61524
B3GAT1L	-2.85243	3.35489	-10.1173	5.88643e-10	3.38552e-08	12.9313
LECT1	-2.82293	5.00119	-18.1814	3.52072e-15	3.64482e-12	24.8406
NTN4L	-2.78232	0.0456201	-5.58435	1.09301e-05	0.000105341	3.38942
RBFOX1	-2.77954	0.82663	-11.4784	5.08375e-11	5.38683e-09	15.1722
PDIA2	-2.76888	3.54476	-4.50404	0.000158943	0.000993236	0.537387
RSPO3	-2.75326	4.937	-14.1736	6.99722e-13	1.9317e-10	19.5879
PLACL2	-2.74313	0.71651	-6.69142	7.79327e-07	1.13901e-05	5.97202
ISL1	-2.74011	3.58588	-7.10155	3.03928e-07	5.31041e-06	6.69669
ANGPTL1	-2.73407	0.657866	-10.4667	3.07585e-10	2.11448e-08	13.5733
COL26A1	-2.72616	6.34258	-15.0401	2.02204e-13	7.17709e-11	20.7179
WNT9A	-2.70882	2.50439	-10.5348	2.71482e-10	1.93829e-08	13.7191
NPY1R	-2.69679	0.261912	-5.22319	2.65489e-05	0.000222699	2.62927
MSX1	-2.67103	3.83204	-5.53369	1.23714e-05	0.000116963	3.19173
MURC	-2.66421	0.419722	-5.54814	1.19416e-05	0.000113504	3.38497
HAS2	-2.6605	4.92718	-7.24828	2.18149e-07	3.97953e-06	6.993
NFASC	-2.63552	0.887893	-8.51878	1.39148e-08	4.21617e-07	9.85444
TGFBI	-2.62384	5.3895	-13.2948	2.62675e-12	5.53087e-10	18.2225
APELA	-2.60579	0.577447	-7.81036	6.2868e-08	1.43858e-06	8.3898
GLIS1	-2.6005	2.11322	-8.6535	1.05244e-08	3.3184e-07	10.0885
CDH22	-2.57479	1.58618	-9.3337	2.66436e-09	1.09965e-07	11.428
MATN2	-2.56754	4.83546	-15.2712	1.46655e-13	5.69343e-11	21.1571
GDF11	-2.55376	0.883321	-5.61536	1.01334e-05	9.86575e-05	3.5345
LRRTM1	-2.55148	0.233699	-5.47733	1.42025e-05	0.000130985	3.21036
NR0B1	-2.55117	2.70752	-9.19721	3.49324e-09	1.36039e-07	11.2167
CYP27C1	-2.53784	1.65506	-7.22315	2.30851e-07	4.18057e-06	7.07869
CPE	-2.53735	6.93893	-17.0684	1.37388e-14	9.48209e-12	23.4479
RBPJL	-2.53667	1.32997	-15.6685	8.52162e-14	3.65048e-11	21.5312
CACNA1D	-2.52535	3.11324	-7.81998	6.15662e-08	1.42918e-06	8.13954
RLN3	-2.50709	0.368162	-4.38769	0.000212579	0.00126904	0.718734
VWDE	-2.50609	1.69483	-8.72127	9.1533e-09	2.96897e-07	10.1772
WNT4	-2.50348	0.753254	-4.99613	4.65991e-05	0.000357126	1.96474
ADCY8	-2.481	1.77951	-6.33252	1.80729e-06	2.30513e-05	5.11581
LRRTM3	-2.47106	0.0472953	-5.30371	2.17641e-05	0.000187631	2.82196
ACHE	-2.44946	2.45455	-5.21705	2.69548e-05	0.000224889	2.3485
RGS4	-2.44685	2.43861	-7.94776	4.668e-08	1.15289e-06	8.69424
ADAMTSL2	-2.436	4.91504	-8.74453	8.7265e-09	2.86797e-07	10.182
ISM1	-2.43207	0.697124	-7.36997	1.66047e-07	3.1302e-06	7.43098
LRRC56	-2.42779	1.11405	-6.49636	1.22864e-06	1.66631e-05	5.54168
ARSI	-2.4072	3.70006	-10.1755	5.2782e-10	3.13737e-08	13.0045
GPR37	-2.4012	0.757297	-7.0485	3.42881e-07	5.85112e-06	6.76798
TMEM132E	-2.38907	1.19443	-7.34121	1.77076e-07	3.308e-06	7.33677
SFRP2	-2.38891	4.33189	-13.1268	3.40907e-12	6.90443e-10	17.9193
MMP13	-2.38619	0.0527583	-3.03324	0.00589343	0.0199168	-2.25311
NSG1	-2.38516	2.82036	-14.5799	3.88064e-13	1.23613e-10	20.1867
TBX3	-2.37372	5.30523	-12.8265	5.46833e-12	9.70473e-10	17.4796
KCNJ8	-2.37138	4.73685	-13.4664	2.01807e-12	4.47688e-10	18.5131
STAB2	-2.35946	1.87003	-8.60024	1.17494e-08	3.64906e-07	10.0059
ALX4	-2.35614	2.0191	-6.48626	1.25812e-06	1.70443e-05	5.42889
PRCP	-2.34359	4.5213	-13.0861	3.63262e-12	7.16317e-10	17.8526
PVALB	-2.34094	4.13749	-11.1581	8.87847e-11	7.86428e-09	14.7276
P4HA3	-2.33802	2.93694	-7.59532	1.00692e-07	2.11906e-06	7.80874
EGFL6	-2.33764	1.9845	-11.2915	7.02816e-11	6.66495e-09	15.0495
CD3E	-2.3212	2.52098	-6.39563	1.55707e-06	2.0383e-05	5.26045
PENK	-2.31226	1.72034	-7.82189	6.13112e-08	1.42918e-06	8.3518
SPP1	-2.30614	2.74174	-2.51975	0.0191095	0.0514293	-3.58872
KCNMA1	-2.28149	2.07582	-7.79627	6.48261e-08	1.46532e-06	8.31706
TIMP4	-2.27982	2.28396	-10.5671	2.55968e-10	1.87052e-08	13.6954
SEMA3A	-2.27857	3.89954	-11.456	5.28349e-11	5.48239e-09	15.1992
GLIPR1L	-2.27175	1.83968	-11.4843	5.03203e-11	5.38683e-09	15.353
NRIP2	-2.25984	1.21271	-7.72175	7.62781e-08	1.64514e-06	8.20283
PLB1	-2.25937	3.25269	-6.81764	5.81941e-07	8.8814e-06	5.8927
ECEL1	-2.25533	1.9491	-7.40873	1.52286e-07	2.90606e-06	7.34236
CHRNA9	-2.24613	0.510388	-7.70747	7.87001e-08	1.69151e-06	8.18921
CNTFR	-2.23955	1.97921	-6.71273	7.4174e-07	1.09568e-05	5.96303
GPR158	-2.22246	2.61532	-8.83335	7.27626e-09	2.50396e-07	10.5045
RUNX2	-2.2213	2.1804	-5.32106	2.08532e-05	0.000181151	2.81554
P2RY8	-2.21512	1.27764	-9.4941	1.94387e-09	8.47324e-08	11.7378
CXXC4	-2.20463	1.27808	-8.3419	2.01503e-08	5.68925e-07	9.47716
MHCYL	-2.2013	0.345762	-2.89233	0.00819681	0.0261435	-2.8146
TMEFF1	-2.19862	1.27678	-6.97233	4.07964e-07	6.69905e-06	6.55844
RET	-2.17969	0.264443	-7.71207	7.79108e-08	1.67745e-06	8.14663
ANO6	-2.17938	3.82382	-9.13286	3.97229e-09	1.48638e-07	10.8704
C11orf87	-2.17408	2.76096	-11.246	7.60989e-11	7.10809e-09	14.9776
FST	-2.16518	3.95734	-3.10788	0.00493932	0.0172386	-2.55871
FKBP6	-2.16056	2.1259	-7.1215	2.90483e-07	5.11868e-06	6.89144
NEFL	-2.15934	3.91594	-10.0081	7.23235e-10	3.8163e-08	12.5411
PDE11A	-2.15921	0.859541	-9.86274	9.53418e-10	4.6884e-08	12.4817
SULF1	-2.15295	4.32696	-10.9635	1.25255e-10	1.01007e-08	14.3662
NPPC	-2.14919	3.11817	-6.991	3.90923e-07	6.47524e-06	6.47195
TWIST1	-2.14908	3.89451	-6.96831	4.11732e-07	6.74796e-06	6.35274
THRB	-2.13239	1.61286	-5.18607	2.91001e-05	0.000240366	2.50675
SYNPO2	-2.12856	0.447927	-6.51873	1.16589e-06	1.60042e-05	5.50855
GDNF	-2.12038	1.22151	-6.62929	9.00477e-07	1.29475e-05	5.83882
UPK1B	-2.11337	0.846225	-3.23102	0.00368176	0.0135965	-2.14426
KCNK3	-2.10899	1.53558	-4.3973	0.000207533	0.0012443	0.722652
NPY7R	-2.10632	3.17278	-9.98351	7.5773e-10	3.97185e-08	12.6887
LUZP2	-2.09421	0.00445297	-4.04557	0.000499223	0.00259927	-0.193298
VIP	-2.08773	2.45179	-4.14972	0.000385102	0.00209672	-0.149312
SLC5A9	-2.07415	0.699944	-7.4153	1.5007e-07	2.87704e-06	7.56349
SLC4A8	-2.0738	2.36107	-8.92537	6.03402e-09	2.17277e-07	10.6772
C1QB	-2.07021	1.40019	-7.54261	1.1312e-07	2.32664e-06	7.78823
PKDCCA	-2.06996	4.50415	-9.8756	9.303e-10	4.64141e-08	12.3207
ATP8A2	-2.0686	0.203164	-8.51184	1.41173e-08	4.26712e-07	9.85426
NKAIN3	-2.06794	0.534808	-5.41448	1.65712e-05	0.000148791	3.03629
CCN3	-2.0493	2.48446	-5.57336	1.12278e-05	0.000107542	3.21464
COL8A1	-2.04441	1.88594	-3.6137	0.00145352	0.00636035	-1.2475
RASL12	-2.04369	0.485831	-4.37054	0.000221886	0.00131992	0.462606
CDH17	-2.04194	0.126883	-7.76553	6.9319e-08	1.5462e-06	8.28387
ANO1	-2.03419	3.7872	-6.90918	4.71449e-07	7.48952e-06	6.23304
COLEC11	-2.03306	3.25716	-10.6755	2.10138e-10	1.60156e-08	13.9091
PROKR1	-2.0329	1.95171	-4.93291	5.45288e-05	0.000406365	1.73906
VILL	-2.01748	0.310023	-3.57051	0.00161592	0.00692946	-1.39241
CLDN5	-2.01331	1.4366	-5.78774	6.66346e-06	6.88115e-05	3.7877
CHL1	-2.00746	0.640646	-3.98584	0.000579207	0.00292262	-0.268668
PHEX	-2.0059	2.03031	-5.65625	9.17182e-06	9.01436e-05	3.46491
EXOC3L	-1.98606	3.16132	-7.75326	7.12009e-08	1.57347e-06	8.20195
PRLH	-1.98562	2.6609	-3.09931	0.00504083	0.0175167	-2.4878
PITX1	-1.98083	0.345969	-4.55327	0.000140546	0.000893553	1.07967
SLC6A15	-1.97877	3.25978	-5.23414	2.58402e-05	0.000217489	2.12414
BRINP1	-1.96438	1.59016	-8.18178	2.8276e-08	7.53803e-07	9.17036
EDAR	-1.96427	0.136191	-7.06124	3.33084e-07	5.73911e-06	6.79251
ADGRA1	-1.96384	0.601664	-7.44754	1.39676e-07	2.71974e-06	7.63317
TMEM136-1	-1.95059	0.140704	-5.00412	4.56833e-05	0.000351419	2.13053
DNASE1L3	-1.94482	1.29454	-8.07985	3.51444e-08	9.05807e-07	8.96588
SHD	-1.9413	0.610426	-7.0185	3.67142e-07	6.15521e-06	6.70122
NKD1	-1.93938	2.36308	-9.91234	8.67399e-10	4.39824e-08	12.5542
FSTL3	-1.9343	2.0468	-3.31619	0.00299967	0.0115729	-1.65587
APOF	-1.93359	0.44111	-4.31447	0.000255254	0.00148178	0.478127
KCNG4	-1.93308	0.116559	-6.49671	1.22764e-06	1.66631e-05	5.5252
HTR2B	-1.92939	2.4334	-7.82728	6.0596e-08	1.41767e-06	8.41413
CPNE4	-1.92483	2.84581	-8.45027	1.60526e-08	4.72563e-07	9.70323
CSGALNACT1	-1.92356	1.23814	-8.34306	2.01015e-08	5.6884e-07	9.51261
PTPRZ1	-1.92201	0.819415	-5.4519	1.51165e-05	0.000137678	3.1272
FHDC1	-1.91581	1.48962	-8.2204	2.60493e-08	7.12797e-07	9.21294
TFPI2	-1.91203	7.52276	-12.3083	1.26094e-11	1.87807e-09	16.4885
KIF26A	-1.90773	5.15003	-11.8007	2.93315e-11	3.46558e-09	15.6615
UGT1A1	-1.9075	0.616709	-3.00968	0.00622971	0.0208491	-2.63934
PDE8A	-1.90649	3.68625	-13.3588	2.38017e-12	5.09807e-10	18.3986
RSPO2	-1.90593	1.89369	-7.51929	1.19113e-07	2.42183e-06	7.72464
LRRC32	-1.90366	4.72934	-6.03366	3.68283e-06	4.18589e-05	4.17111
LAPTM4B	-1.90179	1.95592	-7.81473	6.22734e-08	1.43781e-06	8.33043
OPCML	-1.89777	1.91425	-10.8389	1.56499e-10	1.2305e-08	14.2025
ADAM33	-1.8972	5.58824	-12.4963	9.28332e-12	1.51746e-09	16.8842
MYLK	-1.89526	7.25885	-16.3607	3.39975e-14	1.83795e-11	22.5224
GPR20	-1.89447	1.111	-7.34132	1.77035e-07	3.308e-06	7.36342
CEMIP	-1.88173	1.5728	-4.65663	0.000108567	0.000725125	0.984708
SERPINF1	-1.88069	3.12493	-9.35726	2.54325e-09	1.05316e-07	11.397
HCN1	-1.87989	1.06199	-6.68444	7.9207e-07	1.15492e-05	5.96151
TBX1	-1.87905	2.28363	-6.35446	1.71594e-06	2.21361e-05	5.12022
THBS2	-1.87496	5.00187	-8.46314	1.56266e-08	4.66002e-07	9.29112
NLGN1	-1.87015	1.71695	-5.43287	1.58393e-05	0.00014321	2.91493
SEMA3G	-1.86997	0.154992	-4.36077	0.000227366	0.00134631	0.510481
MPZL2	-1.86707	2.62047	-9.38645	2.40107e-09	1.00772e-07	11.5739
TMEM108	-1.85966	0.580219	-7.46679	1.33826e-07	2.63473e-06	7.66909
CACNA1H	-1.85717	3.07915	-9.18844	3.55485e-09	1.37576e-07	11.1369
EDIL3	-1.85411	0.513189	-7.84519	5.82839e-08	1.36874e-06	8.43044
LDB2	-1.85164	4.09174	-14.0641	8.22094e-13	2.12768e-10	19.3947
AOX2	-1.84202	2.32179	-7.5429	1.13048e-07	2.32664e-06	7.58425
TSHZ3	-1.83954	1.95844	-10.0878	6.22276e-10	3.48808e-08	12.8738
ARRDC1	-1.82924	4.4211	-11.4746	5.11669e-11	5.38683e-09	15.3095
CSMD1	-1.82777	0.187631	-5.7908	6.61419e-06	6.85305e-05	3.92052
FLRT3	-1.82694	5.38894	-11.2346	7.76366e-11	7.19761e-09	14.6457
GRB14	-1.82306	0.886681	-8.96491	5.56963e-09	2.01724e-07	10.7598
TLR4	-1.81852	0.5178	-5.71192	8.00983e-06	8.05066e-05	3.70077
LRRC4C	-1.81381	3.11631	-6.26766	2.10742e-06	2.61282e-05	4.71714
MPL	-1.81292	2.49092	-9.48198	1.99049e-09	8.61599e-08	11.6728
PTX3	-1.80449	4.89544	-10.0261	6.99094e-10	3.74375e-08	12.5843
HGF	-1.80139	2.51209	-4.49159	0.000163966	0.00101847	0.677322
NTM	-1.79767	2.77221	-7.11066	2.97715e-07	5.22539e-06	6.75399
PQLC2L	-1.79358	5.41402	-18.9527	1.4294e-15	2.53677e-12	25.7446
CDKN1C	-1.78614	6.85509	-11.379	6.03657e-11	5.99549e-09	14.9452
ENTPD3	-1.78565	3.15218	-5.91274	4.92569e-06	5.37714e-05	3.85757
NRGN	-1.78174	1.03943	-7.81925	6.16632e-08	1.42918e-06	8.40799
METTL11B	-1.78064	0.88526	-8.50484	1.43247e-08	4.30884e-07	9.80764
LRRIQ1	-1.77824	0.026534	-5.94172	4.59352e-06	5.06796e-05	4.23621
SORCS1	-1.77476	2.21809	-7.94353	4.71078e-08	1.15656e-06	8.57153
NECAB1	-1.76299	3.19511	-8.1333	3.13513e-08	8.19952e-07	8.97066
CCLI8	-1.76183	1.42265	-3.48426	0.00199515	0.00823734	-1.59283
DIXDC1	-1.75686	3.29504	-10.5489	2.6462e-10	1.91126e-08	13.527
KCNS3	-1.75656	0.383523	-2.76388	0.0110245	0.0330336	-2.94384
IL20RA	-1.75597	2.61128	-6.64487	8.68396e-07	1.25297e-05	5.51818
PCSK2	-1.7519	4.59755	-9.75065	1.1819e-09	5.51983e-08	11.9777
RELN	-1.73169	4.15015	-5.63353	9.6941e-06	9.4752e-05	2.97034
ARHGAP15	-1.72742	1.00307	-10.1675	5.35769e-10	3.16946e-08	13.0573
INSRR	-1.72439	0.142058	-6.13541	2.88694e-06	3.42873e-05	4.71316
ST8SIA2	-1.72124	5.17148	-8.91827	6.12165e-09	2.17906e-07	10.3201
PRDM6	-1.71718	3.18975	-5.38989	1.76036e-05	0.000156654	2.50285
NAV3	-1.71462	4.76016	-5.96606	4.33205e-06	4.82665e-05	3.8766
HOXB2	-1.69707	2.83215	-7.57145	1.06137e-07	2.20948e-06	7.73116
TMTC1	-1.69664	4.24932	-8.78165	8.08721e-09	2.6935e-07	10.1622
CCR7	-1.69276	1.86029	-3.43872	0.00222918	0.00904707	-1.73654
INHA	-1.68647	3.02481	-6.61752	9.25517e-07	1.3231e-05	5.3634
CAPN6	-1.6836	2.37817	-5.11121	3.50254e-05	0.000282179	1.714
KRT23	-1.67844	0.53156	-2.16267	0.0411645	0.0950003	-3.96503
TMEM45A	-1.67516	3.26612	-5.76555	7.03175e-06	7.21518e-05	3.67691
CHGB	-1.67111	5.77113	-9.29738	2.86283e-09	1.17765e-07	10.9881
HOXB6	-1.67063	0.409599	-2.27737	0.0323433	0.0781715	-4.03027
EMID1	-1.66957	1.88285	-7.90972	5.0677e-08	1.22245e-06	8.5766
RGS16	-1.66404	0.0950841	-5.66451	8.98932e-06	8.87008e-05	3.64739
MARCO	-1.65389	1.07257	-3.86384	0.000784097	0.00377786	-0.662099
P3H2	-1.65294	3.99113	-6.505	1.20401e-06	1.64729e-05	5.33676
NTF3	-1.65141	2.7059	-8.57244	1.24464e-08	3.81782e-07	9.84584
TP63	-1.65002	0.974309	-4.65778	0.000108257	0.000723438	1.23073
FBLN5	-1.64806	2.45849	-7.39166	1.58194e-07	2.99581e-06	7.04892
USH2A	-1.64565	1.58451	-6.40766	1.51354e-06	1.9876e-05	5.2023
ENPP2	-1.64171	4.99201	-6.12692	2.94609e-06	3.48167e-05	4.12652
BAMBI	-1.64028	6.54581	-17.9741	4.51173e-15	4.03803e-12	24.5707
RNF144A	-1.63328	0.0682855	-4.5885	0.000128707	0.00083061	1.07537
CELF3	-1.63014	1.56403	-4.34438	0.00023687	0.00139328	0.438007
SCIN	-1.62949	0.969667	-5.27758	2.32128e-05	0.00019833	2.6688
ADAMDEC1	-1.62516	0.627167	-2.20339	0.0378101	0.0888097	-4.18905
KCNV1	-1.62011	1.07136	-8.25407	2.42552e-08	6.68119e-07	9.28038
GABRA1	-1.61803	1.60737	-3.41443	0.00236473	0.00950714	-1.73835
APCDD1	-1.61688	3.22709	-4.64179	0.000112668	0.000747689	0.758951
TMEM200C	-1.61588	1.01897	-7.2674	2.08964e-07	3.84587e-06	7.14491
ADAMTS9	-1.61453	4.71172	-11.7572	3.15692e-11	3.66528e-09	15.7179
MMR1L4	-1.61249	2.66721	-6.3801	1.61516e-06	2.09671e-05	5.18615
CACNA1G	-1.60753	3.14736	-11.9111	2.43573e-11	2.94134e-09	15.9717
BMP5	-1.60702	5.83705	-12.0906	1.80524e-11	2.43532e-09	16.1195
SBSPON	-1.60416	2.46303	-8.74076	8.79415e-09	2.87499e-07	10.2207
SHISA2	-1.59885	8.03066	-9.60586	1.5635e-09	7.03375e-08	11.5663
SEPSECS	-1.58875	7.52724	-9.24495	3.17662e-09	1.27301e-07	10.8322
TRPM2	-1.58728	0.540071	-5.58044	1.10351e-05	0.000106188	3.37398
LYPD6	-1.58493	2.51627	-6.87078	5.14913e-07	8.02606e-06	6.25866
RAD21L1	-1.58294	0.353139	-4.12404	0.000410576	0.00221668	-0.100833
SUSD4	-1.57928	0.943849	-5.75484	7.21684e-06	7.36082e-05	3.8569
CH25H	-1.57783	2.16537	-6.09106	3.20974e-06	3.72311e-05	4.57095
CHST9	-1.57145	2.18968	-8.83017	7.32359e-09	2.50636e-07	10.4731
DOCK8	-1.57002	1.54329	-8.09135	3.42901e-08	8.91185e-07	8.92357
GNB3	-1.56557	0.321529	-4.92791	5.52122e-05	0.000410228	1.92733
SOX9	-1.56419	4.67963	-5.23002	2.61044e-05	0.000219266	2.24752
FBN2	-1.56293	5.45651	-11.0203	1.13247e-10	9.57056e-09	14.2506
SCRT2	-1.56285	0.167218	-4.27138	0.000284258	0.00162659	0.355575
HTR2C	-1.56231	0.170697	-6.43175	1.43006e-06	1.89601e-05	5.36903
SERPINB5	-1.56096	1.2024	-3.54149	0.00173492	0.00733841	-1.41717
COL24A1	-1.56021	3.12333	-5.12356	3.39698e-05	0.000274565	1.82852
AJAP1	-1.55978	0.506759	-6.4212	1.46602e-06	1.92928e-05	5.36613
DISP3	-1.55748	2.86845	-4.34503	0.000236488	0.0013917	0.222351
ARHGAP20	-1.55306	1.75379	-5.24911	2.49028e-05	0.000210454	2.53397
C14orf105	-1.55148	1.33102	-3.94485	0.000641324	0.00319581	-0.476072
DCLK1	-1.54843	2.66567	-5.29856	2.20426e-05	0.000189636	2.40683
TSHZ1	-1.54617	3.79288	-10.5162	2.80903e-10	1.98276e-08	13.6377
FADS2	-1.54444	4.98165	-10.5926	2.44307e-10	1.82833e-08	13.6297
ZFHX4	-1.54429	3.31457	-6.28687	2.01355e-06	2.52415e-05	4.56291
SNAP25	-1.54142	3.424	-5.73701	7.53624e-06	7.64892e-05	3.33877
TNFRSF19	-1.5367	4.19113	-8.78877	7.97017e-09	2.66457e-07	9.99053
CLMN	-1.53436	1.86884	-6.15008	2.78762e-06	3.32799e-05	4.47374
DBX2	-1.52562	2.51288	-12.4838	9.47319e-12	1.52838e-09	17.0019
CACFD1	-1.5242	3.88832	-12.22	1.45763e-11	2.0814e-09	16.5659
C8orf4	-1.52387	4.234	-11.9768	2.18197e-11	2.71067e-09	16.1663
DPP6	-1.52288	2.40735	-6.61405	9.33047e-07	1.33233e-05	5.60947
STMN4	-1.52019	1.88377	-5.19753	2.82874e-05	0.000234745	2.35192
DGKB	-1.52009	0.0777353	-4.65034	0.000110286	0.000734514	1.27253
ZNF385B	-1.51837	0.787265	-6.42466	1.45411e-06	1.91682e-05	5.36103
TCTE1	-1.51402	0.576099	-5.15226	3.16394e-05	0.000257068	2.29799
PDZRN4	-1.51279	4.37292	-14.0712	8.13541e-13	2.12768e-10	19.3432
MYL1	-1.51132	8.40405	-9.81484	1.0449e-09	5.0313e-08	11.9828
CCDC80	-1.5093	7.26011	-10.0192	7.08262e-10	3.76014e-08	12.3606
IGSF11	-1.50718	3.09695	-9.01625	5.02091e-09	1.82917e-07	10.5807
FOXO6	-1.5067	2.47753	-6.56635	1.04292e-06	1.46068e-05	5.54622
SH2D1A	-1.50616	1.81515	-5.88681	5.24364e-06	5.62051e-05	4.00936
AR	-1.50237	5.32379	-10.0939	6.15162e-10	3.48808e-08	12.6789
NWD2	-1.49766	1.52157	-6.24377	2.23037e-06	2.73793e-05	4.94761
NCF4	-1.49506	2.20825	-2.96937	0.00684799	0.0226077	-2.80139
CUBN	-1.4928	3.84141	-9.20892	3.41268e-09	1.3374e-07	11.0439
NEIL2	-1.48945	0.817517	-3.93559	0.000656244	0.0032597	-0.528577
PPARG	-1.48744	2.07789	-3.64315	0.00135209	0.00597505	-1.28283
CSRP2	-1.48588	6.40496	-5.88454	5.27243e-06	5.63678e-05	3.44326
CALD1	-1.48432	7.56804	-9.39184	2.37571e-09	1.00046e-07	11.1245
GRIK4	-1.48397	1.14056	-5.57646	1.1143e-05	0.000106978	3.35341
OSGIN1	-1.47803	2.36214	-9.36667	2.49649e-09	1.03725e-07	11.4859
C7	-1.47769	5.39913	-5.75799	7.16193e-06	7.31683e-05	3.01744
SLAMF8	-1.47676	0.0971046	-3.11568	0.00484871	0.0170253	-2.35174
COL16A1	-1.47641	5.26115	-9.10981	4.16004e-09	1.54731e-07	10.6271
MPEG1	-1.4762	2.16866	-5.88729	5.23754e-06	5.61882e-05	3.83363
HLX	-1.4733	3.42923	-5.1117	3.49826e-05	0.000282017	1.9829
ST6GALNAC5	-1.47282	3.63842	-6.32125	1.85609e-06	2.35769e-05	4.79509
FZD9	-1.46863	5.25296	-12.0107	2.06174e-11	2.61357e-09	16.0317
VWA1	-1.46805	4.69354	-6.17529	2.62503e-06	3.15803e-05	4.40001
DRD3	-1.46571	1.18848	-7.45242	1.3817e-07	2.69887e-06	7.57846
ESM1	-1.46367	0.118283	-3.3119	0.00303088	0.0116644	-1.77515
RBBP8NL	-1.46172	2.72058	-8.0395	3.83179e-08	9.75457e-07	8.54017
MYH15	-1.45908	8.63239	-8.28608	2.2668e-08	6.31399e-07	8.85222
MB21D2	-1.45763	3.0608	-8.32784	2.07563e-08	5.82066e-07	9.40723
HMOX1	-1.45664	5.44331	-8.0537	3.71685e-08	9.48141e-07	8.6194
NCALD	-1.45246	4.00086	-10.0671	6.46965e-10	3.53168e-08	12.6674
TOX3	-1.44922	1.02975	-6.57739	1.01637e-06	1.43358e-05	5.611
CHST8	-1.4419	0.958208	-7.96835	4.46524e-08	1.10943e-06	8.72031
KITLG	-1.43662	3.77542	-5.81526	6.23374e-06	6.51318e-05	3.42205
ABI3BP	-1.43609	2.59687	-2.70355	0.0126512	0.0369021	-3.48788
SHANK2	-1.43372	0.218517	-5.16609	3.05749e-05	0.000250549	2.39647
PPP2R2C	-1.43262	0.688047	-5.38102	1.79919e-05	0.000159311	2.81247
LRRTM2	-1.43014	0.111708	-3.69097	0.001202	0.00540836	-1.05844
VSTM2L	-1.42854	0.7195	-5.17632	2.98103e-05	0.000245092	2.26879
CSF3R	-1.42785	1.09328	-5.73808	7.51655e-06	7.63517e-05	3.74862
RTN4R	-1.42771	1.9287	-7.08474	3.15757e-07	5.47092e-06	6.71974
CCR2	-1.42302	1.3096	-4.7526	8.54453e-05	0.000595004	1.36263
HECW1	-1.41956	2.24776	-7.79339	6.52341e-08	1.47079e-06	8.2265
PPP4R4	-1.41767	2.37897	-9.81019	1.05424e-09	5.05667e-08	12.2977
STXBP5L	-1.41748	2.64667	-9.88084	9.21048e-10	4.63152e-08	12.4692
COL9A1	-1.41717	0.0112319	-4.57393	0.000133477	0.000856056	0.878491
TGFBR2L	-1.41512	4.12901	-8.92621	6.02378e-09	2.17277e-07	10.5099
FGF22	-1.41457	2.83139	-5.02002	4.39149e-05	0.000340121	1.85047
HTR2A	-1.41428	3.53196	-4.42663	0.000192865	0.00117105	0.282892
KCNQ5	-1.40562	0.745569	-4.97165	4.95223e-05	0.000376049	1.86423
LARGE2	-1.4052	5.64992	-11.3748	6.08091e-11	5.99549e-09	14.9512
GPR137C	-1.39831	4.75233	-10.6887	2.05182e-10	1.58322e-08	13.7685
CYP1B1	-1.39724	7.16474	-7.75176	7.14352e-08	1.57347e-06	7.63961
HECTD2	-1.39116	4.925	-6.28231	2.03543e-06	2.54133e-05	4.76071
VDR	-1.38973	1.46403	-6.00268	3.96709e-06	4.44793e-05	4.40421
TRPC6	-1.38932	3.50534	-6.76719	6.53849e-07	9.83385e-06	5.82888
NSMF	-1.38813	6.91502	-8.91005	6.22453e-09	2.20187e-07	10.1325
STOX1	-1.38774	1.10902	-5.75539	7.2073e-06	7.35713e-05	3.55907
CORO2A	-1.38408	2.488	-4.69815	9.7879e-05	0.000664817	1.1036
CHRM3	-1.37795	2.94729	-7.10063	3.04564e-07	5.31405e-06	6.51303
GDAP1L1	-1.37441	2.05148	-6.64704	8.64036e-07	1.24813e-05	5.774
ANGPT4	-1.37189	3.16876	-9.07932	4.42243e-09	1.63026e-07	10.7514
COL11A1	-1.36686	3.62013	-8.36145	1.93383e-08	5.56111e-07	9.18733
FAM129A	-1.36648	2.60628	-10.3165	4.05922e-10	2.53406e-08	13.2697
CBX2	-1.36327	4.0421	-10.6701	2.122e-10	1.60741e-08	13.8165
LPAR6	-1.359	2.06698	-9.176	3.64417e-09	1.39979e-07	11.1687
AOAH	-1.35484	0.658644	-5.23899	2.55325e-05	0.00021519	2.49069
TTC39A	-1.3532	0.850681	-3.83897	0.000833936	0.00397106	-0.839363
CD83	-1.34975	0.991594	-5.00988	4.50344e-05	0.000347277	2.02488
ASTN2	-1.34916	4.00609	-9.88761	9.09242e-10	4.59167e-08	12.312
ITGB3	-1.34839	5.44505	-6.13689	2.87675e-06	3.42317e-05	4.05308
MARCHF1	-1.3466	1.73273	-5.9364	4.65273e-06	5.11512e-05	4.10296
GATA5	-1.34519	8.90927	-12.2658	1.35199e-11	1.97597e-09	16.4737
PTPRB	-1.34333	3.34939	-3.7436	0.0010557	0.00484663	-1.62179
UCHL1	-1.33761	6.97478	-9.21202	3.39165e-09	1.33341e-07	10.7552
LMO2	-1.33753	4.73947	-12.0782	1.84271e-11	2.43532e-09	16.1656
AMER2	-1.33558	0.59084	-4.98734	4.76287e-05	0.000363224	1.93071
P4HTM	-1.33092	3.82263	-8.83046	7.31927e-09	2.50636e-07	10.2013
C8orf22	-1.32811	3.29476	-2.89102	0.00822183	0.0261995	-3.23567
PCDH1	-1.32749	1.84106	-6.78824	6.22796e-07	9.42386e-06	6.02018
ID1	-1.32723	5.5029	-8.65448	1.05032e-08	3.3184e-07	9.61513
IGFN1	-1.32425	0.974655	-6.62771	9.03799e-07	1.29802e-05	5.75828
ESAM	-1.32252	4.52282	-7.2094	2.38119e-07	4.29517e-06	6.62853
GPM6B	-1.31736	4.99875	-9.57698	1.65375e-09	7.36364e-08	11.5884
LAMC3	-1.31479	2.9875	-8.88654	6.5292e-09	2.27844e-07	10.3643
FAM124B	-1.31287	0.69028	-6.99233	3.89735e-07	6.46419e-06	6.6196
CPNE9	-1.31283	4.26588	-5.84605	5.78621e-06	6.13852e-05	3.36549
NANOS3	-1.31267	1.60801	-4.49161	0.000163958	0.00101847	0.767542
LRRN3	-1.31208	2.86768	-6.59379	9.7819e-07	1.39358e-05	5.43729
CDH20	-1.30744	0.150111	-4.11054	0.000424629	0.00227672	-0.112113
PPFIA2	-1.30654	1.0037	-5.54453	1.20474e-05	0.000114336	3.20399
CCL26	-1.30578	0.380889	-5.57671	1.11362e-05	0.000106978	3.17289
USH1C	-1.30545	0.216279	-5.46926	1.44864e-05	0.000133281	3.01516
CTSS	-1.30404	3.12215	-6.77853	6.36934e-07	9.59107e-06	5.82957
GFRA4	-1.30017	2.51745	-5.38485	1.78229e-05	0.000158153	2.42571
OPRM1	-1.29692	0.0350531	-4.41435	0.000198879	0.00120052	0.659433
PTPN5	-1.2966	0.248144	-3.81553	0.000883757	0.0041636	-0.652168
BCL2L14	-1.29614	0.201196	-5.13498	3.30225e-05	0.000267257	2.38199
MAP1B	-1.29507	6.94903	-4.92421	5.57217e-05	0.000412779	0.880799
CNDP1	-1.29035	1.4124	-4.19422	0.00034464	0.00191491	-0.257836
TCF24	-1.28779	1.09748	-5.2773	2.32287e-05	0.00019833	2.61039
TENM4	-1.28723	5.29296	-8.59133	1.19683e-08	3.69857e-07	9.49314
BIN1	-1.28646	7.29906	-10.4233	3.33175e-10	2.19e-08	13.1315
S100A6	-1.2815	5.03028	-3.15852	0.00437875	0.0156717	-2.91842
EPHX1L	-1.28145	1.29109	-4.94287	5.31956e-05	0.000397623	1.66265
ELMOD1	-1.27636	3.45297	-7.56849	1.06832e-07	2.21936e-06	7.43516
NLGN4	-1.2721	3.20856	-8.57422	1.24005e-08	3.81314e-07	9.80148
SARM1	-1.26877	3.77308	-9.3686	2.48699e-09	1.03677e-07	11.2439
RORB	-1.26406	0.142518	-2.14564	0.0426456	0.0977285	-4.10002
NOG2	-1.26195	1.0886	-3.67203	0.00125937	0.00561563	-1.1363
SERTM1	-1.26179	1.00933	-6.74329	6.91023e-07	1.0318e-05	6.01927
FAIM2	-1.26143	1.40741	-7.57531	1.05235e-07	2.1972e-06	7.65228
B3GALT1	-1.25917	3.19164	-8.0992	3.37194e-08	8.78189e-07	8.7813
CES1L2	-1.25842	1.80726	-5.61482	1.01468e-05	9.87108e-05	3.25922
GREM2	-1.25567	2.55654	-3.26023	0.00343248	0.012871	-2.54379
EPHB1	-1.2551	4.78455	-11.1445	9.09224e-11	7.95443e-09	14.5978
VTN	-1.25507	2.01798	-8.20778	2.67564e-08	7.23781e-07	9.14936
ANGPTL4	-1.25427	6.36765	-5.41061	1.67295e-05	0.00014995	2.24073
ABHD8	-1.2534	1.45781	-4.91245	5.73771e-05	0.000422773	1.66044
SCARA3	-1.25319	3.73174	-10.1862	5.17397e-10	3.0902e-08	12.935
CLMP	-1.2521	4.00833	-4.99948	4.62133e-05	0.000355045	1.4548
TMEM198	-1.2484	4.28433	-10.0504	6.67683e-10	3.60636e-08	12.6837
SPI1	-1.24728	2.02506	-5.47881	1.41512e-05	0.000130706	2.92422
ARHGEF5	-1.24265	0.383144	-4.76749	8.2332e-05	0.000576882	1.39515
ITIH5	-1.24257	2.33405	-3.77576	0.000975097	0.00453354	-1.1985
ADGRB3	-1.23841	0.298893	-2.41376	0.0241174	0.0619926	-3.76837
KCNK5	-1.23778	1.02689	-2.80382	0.0100589	0.0307672	-3.16728
SNAI1	-1.23514	5.52382	-8.64715	1.06632e-08	3.34518e-07	9.66601
COL27A1	-1.23466	4.88788	-10.244	4.64422e-10	2.8282e-08	13.0709
CABLES2	-1.23366	5.11779	-17.4631	8.40446e-15	6.52554e-12	23.9702
RGS5	-1.23277	4.25703	-5.69307	8.3855e-06	8.3606e-05	3.03727
ENHO	-1.23151	3.0392	-4.18487	0.000352777	0.00195301	-0.351463
SNCAIP	-1.23088	5.95563	-8.01106	4.0731e-08	1.02846e-06	8.2757
ZNF804A	-1.22834	1.12512	-7.42643	1.46395e-07	2.81963e-06	7.49158
ADAM22	-1.22792	0.819483	-6.36001	1.69358e-06	2.18932e-05	5.14323
CRACDL	-1.22519	0.217127	-3.71182	0.00114178	0.00517345	-1.02402
C3	-1.22491	1.41767	-3.40019	0.0024479	0.00977193	-1.90968
CIDEC	-1.2224	2.799	-6.83776	5.55575e-07	8.56317e-06	5.82238
PLIN3	-1.21956	0.459715	-5.2028	2.79208e-05	0.000232168	2.33845
ESPN	-1.21407	1.06359	-3.40181	0.00243834	0.00974316	-1.79808
ISLR2	-1.21273	3.05763	-3.86146	0.000788738	0.00379787	-1.25193
AMER3	-1.21212	2.63877	-6.73684	7.01421e-07	1.04481e-05	5.90269
GDPD4	-1.21054	1.58858	-5.82686	6.06111e-06	6.35419e-05	3.51863
MAP3K8	-1.20916	2.5831	-4.53987	0.000145333	0.000920222	0.934095
B3GALNT1	-1.20658	5.16409	-8.81144	7.60921e-09	2.57573e-07	10.0144
PCDH9	-1.20606	2.956	-3.38052	0.00256751	0.0101872	-2.06257
PDE1A	-1.20477	2.37648	-3.18707	0.00409026	0.0148403	-2.46703
APLNR	-1.20205	2.87415	-6.57727	1.01665e-06	1.43358e-05	5.27378
PRIMA1	-1.19768	5.04789	-8.08647	3.46499e-08	8.96783e-07	8.46587
ST6GAL2	-1.19545	2.48106	-5.46148	1.47655e-05	0.000135174	2.74005
TINAG	-1.19453	1.59145	-5.64802	9.35759e-06	9.18241e-05	3.26319
TOX2	-1.18897	4.7663	-6.26441	2.12372e-06	2.62779e-05	4.44808
SLC51AL	-1.1858	0.0135127	-4.23023	0.000315016	0.00177159	0.168167
TG	-1.18546	0.722226	-3.04076	0.00578978	0.0196306	-2.52108
CLSTN2	-1.18534	0.0402403	-3.56864	0.00162337	0.00695418	-1.44436
PGC	-1.18257	0.925644	-5.04648	4.11234e-05	0.000321913	1.91304
UNC80	-1.18194	0.659132	-4.2991	0.000265245	0.00153333	0.187203
NES	-1.18069	8.73188	-6.57638	1.01878e-06	1.43495e-05	4.96994
DIRAS2	-1.17909	3.22476	-5.46535	1.46258e-05	0.000134192	2.5103
FGFR3	-1.17905	4.91691	-5.50173	1.33782e-05	0.000125137	2.40076
GLT8D2	-1.17878	2.54984	-4.80298	7.53595e-05	0.000534661	1.04415
SLC28A2	-1.17869	0.262634	-4.78529	7.87567e-05	0.000556222	1.41268
SYBU	-1.17538	2.58901	-5.54715	1.19705e-05	0.000113692	3.09589
FCN3	-1.17347	1.11252	-3.49126	0.0019614	0.00812757	-1.6872
IL1R1	-1.17083	6.19595	-7.17003	2.60261e-07	4.63876e-06	6.35469
GPR137B	-1.17051	3.32714	-7.15352	2.70163e-07	4.80147e-06	6.71382
MACROD2	-1.16997	4.22835	-11.1568	8.89766e-11	7.86428e-09	14.6146
PPM1L	-1.16918	1.5824	-4.21472	0.000327451	0.00183075	-0.0755428
MAPK13	-1.16861	1.02408	-4.03972	0.00050654	0.002629	-0.179447
NHS	-1.16749	3.8739	-5.20364	2.78633e-05	0.000231846	2.00637
C14orf132	-1.16441	1.48934	-4.17053	0.000365624	0.00201061	-0.464736
KCNB2	-1.16385	0.0420857	-3.6837	0.0012237	0.00549236	-1.11377
PARD6A	-1.1591	1.00151	-3.09042	0.00514824	0.0178003	-2.32937
MCTP2	-1.15789	1.05253	-3.94669	0.000638406	0.00318511	-0.607744
TCAP	-1.15679	4.79143	-2.86635	0.00870632	0.0274375	-3.58884
NFATC2	-1.1566	1.20402	-3.2076	0.00389429	0.01425	-2.36198
PCDH12	-1.15607	2.10888	-5.51026	1.31015e-05	0.000122745	2.87738
KCNF1	-1.15458	1.53727	-4.31586	0.000254365	0.0014787	0.212303
RSFR	-1.15425	0.147737	-2.6368	0.0147134	0.041665	-3.47566
TMEM119	-1.14961	5.05836	-6.9568	4.22717e-07	6.88259e-06	5.99577
CYBB	-1.14921	1.39066	-3.89542	0.000725047	0.00353364	-0.703323
CYP26B1	-1.14836	4.96491	-6.56264	1.05202e-06	1.47176e-05	5.02969
NACAD	-1.14836	3.52037	-6.83079	5.64563e-07	8.65872e-06	5.88734
BDKRB1	-1.14743	0.43202	-2.69981	0.0127592	0.0371037	-3.19117
DMBT1	-1.14577	0.917041	-4.11272	0.000422318	0.00226727	-0.35677
LEKR1	-1.1437	1.6734	-4.18874	0.000349386	0.00193769	0.0747116
SLC1A2	-1.14308	1.52019	-2.67602	0.0134664	0.0387253	-3.22173
LAMP5	-1.14269	2.6548	-5.23552	2.57522e-05	0.000216895	2.27935
C3AR1L	-1.14024	0.550532	-4.49984	0.000160618	0.00100169	0.759119
ATOH8	-1.13759	4.02778	-7.11053	2.97801e-07	5.22539e-06	6.35193
BEST3	-1.13499	2.46949	-4.36177	0.000226799	0.00134424	-0.00297453
ROBO2	-1.13493	2.55166	-4.14663	0.000388082	0.00210714	-0.311474
EPHA4	-1.13411	5.29137	-7.35436	1.71944e-07	3.23156e-06	6.91053
AKAP12	-1.13302	7.3752	-8.07084	3.58287e-08	9.21532e-07	8.35342
FILIP1L	-1.13149	6.79075	-8.14565	3.05366e-08	8.00329e-07	8.50197
CCL4	-1.13139	2.91513	-2.36809	0.0266289	0.0671153	-3.83271
C1H3ORF52	-1.12674	1.05206	-2.92891	0.00752757	0.0244037	-2.86727
BATF3	-1.12538	2.74179	-3.98785	0.000576326	0.00290926	-0.671304
AUTS2	-1.12051	5.0384	-5.77403	6.88857e-06	7.09591e-05	3.10829
KIAA0408	-1.11822	1.56079	-6.44155	1.39748e-06	1.86275e-05	5.17392
GRIN2B	-1.11537	0.411034	-2.90545	0.00795052	0.025497	-2.8892
GP1BB	-1.11468	2.88654	-6.34544	1.7529e-06	2.25195e-05	4.85088
SLC7A2	-1.11334	1.82107	-7.09775	3.06565e-07	5.33398e-06	6.70071
AKR1D1	-1.11139	4.76405	-6.23723	2.26528e-06	2.77256e-05	4.14168
NRG3	-1.11101	0.923047	-5.21754	2.69221e-05	0.000224889	2.42738
RHOBTB1	-1.10931	3.34576	-8.26352	2.37751e-08	6.59282e-07	9.09748
NEURL1	-1.10657	2.40446	-2.99793	0.0064041	0.021335	-2.81362
HEG1	-1.10628	4.72267	-2.89457	0.00815433	0.0260184	-3.76788
NTRK2	-1.10603	2.36414	-4.07073	0.000468907	0.00246937	-0.761408
IL34	-1.10531	0.920237	-2.4503	0.0222679	0.0583492	-3.71358
ANKRD44	-1.10252	5.22447	-9.61861	1.52528e-09	6.91552e-08	11.6152
SMOX	-1.1023	4.99502	-8.52245	1.38089e-08	4.19432e-07	9.60103
CYP2R1	-1.10068	3.06799	-7.72593	7.55832e-08	1.6381e-06	7.95995
INSYN1	-1.10051	0.00330335	-5.14662	3.20839e-05	0.000260339	2.34195
KCNE4	-1.10021	4.34347	-6.72287	7.24503e-07	1.07405e-05	5.47411
SBK1	-1.09954	2.34801	-2.40621	0.024517	0.0628012	-3.99795
KBTBD11	-1.09783	5.17397	-7.44677	1.39915e-07	2.72012e-06	6.98435
VDHAP	-1.09748	3.71683	-7.32982	1.81652e-07	3.3833e-06	6.99623
TRIM71	-1.0971	1.93313	-4.21593	0.000326466	0.00182606	-0.0118527
DAB1	-1.09655	4.26936	-7.54117	1.13481e-07	2.3302e-06	7.36698
MFAP2	-1.09624	6.10118	-7.48018	1.29904e-07	2.58622e-06	7.02254
TSPAN13	-1.09447	3.90728	-5.19183	2.86887e-05	0.000237442	1.91749
DNAH9	-1.09441	0.783486	-4.07372	0.000465419	0.00245516	-0.338915
RASSF10	-1.0933	2.23791	-4.13214	0.000402361	0.00217422	-0.296373
C15orf52	-1.09316	2.2592	-5.01405	4.45714e-05	0.000344562	1.69981
ST8SIA1	-1.08955	2.23288	-5.35783	1.90481e-05	0.000167233	2.54478
ADAM19	-1.08887	2.36103	-4.49455	0.000162757	0.00101248	0.558093
CRABP2	-1.08807	4.11968	-5.02974	4.28682e-05	0.000334098	1.20168
SLC16A12	-1.08774	4.51642	-5.51211	1.30425e-05	0.000122284	2.72405
DNASE2B	-1.08633	2.10552	-8.90674	6.26658e-09	2.20537e-07	10.4794
NR5A2	-1.08516	1.00571	-3.8529	0.000805646	0.00386132	-0.718433
EYA2	-1.08446	1.07841	-5.80734	6.35437e-06	6.63364e-05	3.63925
SGIP1	-1.08337	0.756605	-3.16426	0.00431925	0.0155036	-2.29357
SCUBE3	-1.08142	1.4565	-5.33996	1.99046e-05	0.000173613	2.59894
TRPM3	-1.0812	0.554869	-3.01217	0.00619323	0.0207658	-2.65068
HPCAL4	-1.08092	1.37042	-6.94491	4.34374e-07	7.02633e-06	6.40926
TOPAZ1	-1.08063	0.823184	-3.35814	0.00271052	0.0106391	-1.98157
LFNG	-1.08049	5.35147	-7.67921	8.37275e-08	1.79645e-06	7.55146
HOXB3	-1.08033	4.72019	-7.88394	5.35861e-08	1.28514e-06	7.99406
GRAPL	-1.08005	0.957344	-4.01143	0.000543498	0.00277512	-0.447695
LRRK2	-1.07964	4.12466	-10.6922	2.03873e-10	1.58295e-08	13.876
BCAN	-1.07954	1.96297	-4.62245	0.000118241	0.000773926	0.943243
TRABD2B	-1.07867	3.6635	-5.01344	4.4639e-05	0.00034487	1.4241
CD48	-1.07818	0.895591	-4.60918	0.000122226	0.000796126	0.912716
CPNE8	-1.0774	2.53768	-3.71705	0.00112717	0.0051236	-1.09527
MAP3K12	-1.07693	3.0633	-5.14587	3.21442e-05	0.000260657	2.04781
PRR5	-1.07562	1.94244	-6.64384	8.70483e-07	1.25453e-05	5.59228
ERG	-1.07506	4.86984	-5.33976	1.99145e-05	0.000173613	2.07541
TIFA	-1.07296	1.5012	-3.84366	0.000824304	0.00393556	-0.777487
EHBP1	-1.07237	6.73875	-9.75924	1.16254e-09	5.45912e-08	11.8444
DUSP15	-1.06859	1.38179	-6.06711	3.39907e-06	3.9135e-05	4.39972
SLITRK6	-1.06845	4.82142	-4.41318	0.000199459	0.00120344	-0.358613
TBX2	-1.06807	4.76799	-6.45598	1.35084e-06	1.8103e-05	4.80414
SPRY4	-1.06773	1.74831	-3.50333	0.00190447	0.00791544	-1.49552
CACNA1F	-1.06705	1.99227	-2.97463	0.00676405	0.0223781	-2.95873
PTAFR	-1.06577	0.82198	-4.29244	0.000269693	0.00155399	0.26747
RAMP3	-1.06434	2.55574	-5.66172	9.05061e-06	8.9164e-05	3.16459
GRID1	-1.06251	2.26818	-4.61825	0.00011949	0.000780863	0.713629
VOPP1	-1.06181	3.02121	-7.63601	9.20611e-08	1.955e-06	7.8948
SYNPO	-1.06088	5.21285	-6.61874	9.22898e-07	1.32087e-05	5.10673
GPR65	-1.06013	0.996852	-3.80997	0.000896013	0.00421316	-0.990022
DOC2B	-1.0596	3.06383	-3.83648	0.000839094	0.00398931	-1.14135
ANKFN1L	-1.05946	2.77474	-6.73474	7.0485e-07	1.04866e-05	5.72452
INPP5D	-1.05907	2.53177	-7.87328	5.48381e-08	1.30508e-06	8.24742
ATP2B2	-1.05694	3.87997	-7.0111	3.7339e-07	6.2431e-06	6.20948
TMEM63A	-1.05661	3.63914	-8.87728	6.65324e-09	2.31522e-07	10.3091
VNN2	-1.05533	0.159918	-3.77298	0.000981825	0.0045563	-1.00035
MRC1	-1.05513	5.38051	-5.57596	1.11565e-05	0.000107025	2.82314
C1orf210	-1.05356	1.13635	-4.27487	0.000281789	0.0016153	-0.041332
OVCH1	-1.05307	0.991548	-3.66761	0.00127316	0.00566897	-1.20172
TWIST2	-1.04962	4.83779	-6.49927	1.22028e-06	1.66223e-05	4.86209
APMAP	-1.0495	5.2364	-12.3657	1.14786e-11	1.77364e-09	16.6223
MYO1F	-1.04864	0.783534	-4.08584	0.000451585	0.00239451	-0.353646
SLITRK3	-1.04784	0.0352824	-3.46901	0.00207071	0.00850678	-1.58837
ADAMTS19	-1.0467	2.39379	-4.02306	0.000527995	0.00271606	-0.94309
TOM1L2	-1.04647	6.74115	-9.42878	2.20932e-09	9.46426e-08	11.1949
SAT1	-1.04587	7.07953	-8.59282	1.19315e-08	3.69639e-07	9.47784
RNF213	-1.04579	3.09257	-6.33098	1.81384e-06	2.31112e-05	4.84298
LAPTM5	-1.04444	2.27226	-4.36505	0.00022495	0.00133711	-0.067772
TRPS1	-1.04402	2.61364	-3.07423	0.00534955	0.0183432	-3.00888
TMEM132D	-1.04203	2.68305	-7.47714	1.30784e-07	2.59542e-06	7.37046
SYT1	-1.04173	2.9048	-7.04322	3.47031e-07	5.91382e-06	6.55126
FAM20C	-1.04137	4.30389	-4.80449	7.50754e-05	0.000533254	0.904423
PTK2B	-1.04081	0.835209	-2.3889	0.0254558	0.064816	-3.85347
TFPI	-1.04038	5.63282	-8.00743	4.10501e-08	1.03232e-06	8.32566
CLEC14A	-1.03941	3.18219	-5.06643	3.91375e-05	0.000309488	1.56872
CBFA2T3	-1.03897	3.509	-8.68406	9.88173e-09	3.14771e-07	9.96373
EDN2	-1.03817	0.863319	-2.42965	0.0232963	0.060319	-3.94786
ARHGAP40	-1.03643	2.00999	-4.90201	5.88864e-05	0.00043159	1.5037
NFKBIZ	-1.03618	4.89715	-5.68346	8.58386e-06	8.52167e-05	3.22439
CACNB3	-1.03575	0.64106	-3.36864	0.0026425	0.0104348	-1.76502
NELL2	-1.0357	4.42966	-3.482	0.00200619	0.0082727	-2.51694
CA2	-1.03561	6.99425	-7.07294	3.24342e-07	5.60403e-06	6.26548
FGL2	-1.03474	3.08975	-2.44525	0.0225155	0.0588368	-3.96722
TC2N	-1.03314	1.34853	-4.36224	0.000226532	0.0013433	0.364835
NRROS	-1.03164	1.07098	-3.87503	0.000762661	0.00369378	-0.829361
FAT4	-1.02954	5.09958	-6.53028	1.13475e-06	1.56459e-05	4.8725
ID4	-1.02878	7.92753	-6.45257	1.36171e-06	1.81898e-05	4.62846
SLCO2B1	-1.026	1.00759	-5.06878	3.89102e-05	0.000307994	1.91052
CD36	-1.02387	2.48711	-3.29819	0.00313272	0.011971	-2.34934
CTNNA2	-1.02376	3.40417	-6.39747	1.55031e-06	2.0316e-05	4.66384
SPTLC3	-1.02335	0.163005	-2.67286	0.0135631	0.0388773	-3.06699
PAK6	-1.0228	2.74287	-6.04738	3.56364e-06	4.06903e-05	3.93629
IL2RG	-1.02199	0.868523	-4.20057	0.000339226	0.00188893	0.0315336
CXorf36	-1.02024	3.47618	-6.46604	1.3193e-06	1.77377e-05	4.88271
SOUL	-1.01971	2.76165	-3.21902	0.00378923	0.0139188	-2.92877
ASIC1	-1.01918	1.62515	-5.46058	1.47979e-05	0.000135371	2.71597
TMEM132C	-1.01906	3.14636	-5.69159	8.41575e-06	8.38403e-05	3.23827
NME1	-1.01899	2.37684	-6.007	3.92614e-06	4.406e-05	4.20087
RIMS1	-1.0168	1.8702	-6.9541	4.25328e-07	6.89706e-06	6.36487
LRP5	-1.0152	3.64498	-6.92558	4.54043e-07	7.28757e-06	6.16848
LAMA4	-1.01335	5.67859	-10.0068	7.24984e-10	3.8163e-08	12.3392
COL9A3	-1.01326	2.16767	-2.61864	0.0153269	0.043099	-3.77151
CSF1R	-1.01119	2.98915	-5.16283	3.08227e-05	0.000251915	1.80501
ABI3	-1.01023	1.04904	-4.11771	0.000417102	0.00224437	-0.157448
LAMB4	-1.00884	1.0073	-6.4373	1.4115e-06	1.87541e-05	5.3281
KCNH2	-1.00814	4.28353	-6.31674	1.876e-06	2.37524e-05	4.59126
PCDHA6	-1.00634	2.33432	-5.25767	2.43817e-05	0.000206753	2.3936
EPHA7	-1.00561	3.75324	-7.41027	1.51763e-07	2.90054e-06	7.06527
HAVCR1	-1.00492	0.917383	-4.34753	0.000235016	0.00138436	0.25924
CEP44	-1.00344	4.25199	-9.45394	2.10287e-09	9.03943e-08	11.4305
SAMD14	-1.00153	1.4262	-5.2912	2.24458e-05	0.000192572	2.45041
SLC35E4	-1.00097	2.19629	-3.86997	0.00077229	0.00372878	-0.656264
SLC16A7	1.00035	3.44767	7.05245	3.39815e-07	5.82233e-06	6.34091
MSRB3	1.0016	6.83237	8.37715	1.87108e-08	5.40568e-07	8.99256
KCNH6	1.00229	5.3878	6.69246	7.77455e-07	1.13761e-05	5.24721
HOMER2	1.00264	5.17211	8.75028	8.62408e-09	2.84183e-07	9.87622
TSTD1	1.00385	7.46722	7.0012	3.81919e-07	6.35151e-06	5.92075
KRT13	1.00419	2.68329	9.53338	1.80031e-09	7.93096e-08	11.6541
ARHGAP8	1.00672	1.40735	5.25592	2.44874e-05	0.000207293	2.30057
ADCY3	1.00704	3.86549	6.83681	5.56791e-07	8.57127e-06	5.65862
SULT1B	1.0072	0.820324	4.14803	0.000386734	0.00210252	-0.184693
NUP210	1.00727	3.04878	6.27152	2.08821e-06	2.59418e-05	4.54042
USP13	1.00766	4.39402	3.76152	0.00101001	0.00466964	-1.82799
TECRL	1.00957	9.5201	6.16467	2.69231e-06	3.22843e-05	4.04931
MAP7D2	1.01043	1.13039	2.87598	0.00851415	0.0269464	-3.16384
MFN1	1.02045	7.24813	8.65151	1.05676e-08	3.32358e-07	9.5767
EGFLAM	1.02154	6.95748	8.49828	1.45218e-08	4.34709e-07	9.25269
ABLIM1	1.02302	5.51187	5.16526	3.06375e-05	0.00025081	1.48664
SELENOP1	1.02975	6.46756	10.1946	5.09307e-10	3.05658e-08	12.6841
FRZB	1.03062	6.8472	7.4444	1.40655e-07	2.73025e-06	6.93198
F3	1.03066	5.24636	4.7756	8.06828e-05	0.000566604	0.575823
HOPX	1.03445	4.78625	5.60529	1.03854e-05	0.000100627	3.08575
HNMT	1.03481	5.21335	6.31589	1.8798e-06	2.37524e-05	4.41322
FAM13C	1.03795	0.847679	3.67306	0.00125619	0.00560748	-1.19588
PPP1R3C	1.04035	5.16116	4.25483	0.000296253	0.00168514	-0.542971
TEC	1.04124	3.77551	5.28586	2.27437e-05	0.000194859	2.17944
GAP43	1.04153	5.96325	3.99226	0.00057003	0.00288334	-1.35163
TJP2	1.045	6.46993	11.3372	6.49109e-11	6.29991e-09	14.7995
TNNT2	1.04684	11.6481	6.5246	1.14994e-06	1.58203e-05	4.98682
NIM1K	1.04717	2.44781	5.21709	2.69521e-05	0.000224889	2.16822
EEF2K	1.0504	5.6639	9.14978	3.84014e-09	1.46338e-07	10.6921
SUSD5	1.05102	0.294871	2.78645	0.0104686	0.0317275	-3.13157
CSTA	1.05288	5.26096	6.1266	2.94833e-06	3.48167e-05	3.9697
BVES	1.05407	7.35869	6.27507	2.07068e-06	2.57756e-05	4.21071
SNCB	1.05516	2.06115	3.02079	0.00606887	0.0204153	-2.83825
MCC	1.05522	3.92966	8.46178	1.56711e-08	4.66002e-07	9.36153
GVINP1	1.05602	1.21341	2.60909	0.0156591	0.0438432	-4.32482
LDB3	1.05683	6.47114	4.6384	0.000113623	0.000752019	0.153889
CYCS	1.05904	8.14482	10.0662	6.48171e-10	3.53168e-08	12.4603
KIRREL3	1.06099	5.5914	6.27733	2.05962e-06	2.56637e-05	4.19896
CAP2	1.06706	6.97914	7.56568	1.07496e-07	2.22943e-06	7.21373
RASL10B	1.06753	4.3453	7.62548	9.42197e-08	1.99402e-06	7.5241
FN1	1.06842	10.8721	7.33445	1.79778e-07	3.35343e-06	6.81278
KCNG2	1.06857	2.57656	3.54228	0.00173153	0.00733157	-1.81537
BAALC	1.07085	1.25919	3.89096	0.000733121	0.0035674	-0.762316
EPS8	1.07191	5.53799	10.1505	5.5314e-10	3.22613e-08	12.6107
TRIM47	1.07378	5.75137	8.68598	9.84266e-09	3.14333e-07	9.72177
METAP1D	1.07547	1.47892	6.75112	6.78618e-07	1.01817e-05	5.98119
FBXO40	1.07602	2.66269	4.36438	0.000225328	0.00133745	0.148405
FBXL4	1.07624	1.72502	6.02212	3.78622e-06	4.28771e-05	4.28965
GNG10	1.08896	4.93142	8.4006	1.78121e-08	5.18219e-07	9.13411
RND2	1.09098	2.22011	8.15208	3.01213e-08	7.94473e-07	8.7929
SGCD	1.09474	5.68118	5.52621	1.25997e-05	0.000118941	2.36942
LACTB2	1.09497	5.26841	13.1199	3.44582e-12	6.90443e-10	17.8282
RGS12	1.09687	4.21788	9.8307	1.01364e-09	4.91894e-08	12.0848
PDGFC	1.09747	4.49966	10.3999	3.4786e-10	2.27124e-08	13.1569
KLF15	1.09769	3.60112	5.69873	8.27098e-06	8.27565e-05	3.24907
GRTP1	1.0984	4.77155	7.26365	2.10732e-07	3.87267e-06	6.61266
LBH	1.10035	8.93141	10.9411	1.30358e-10	1.0381e-08	14.1039
ATP5G1	1.10149	8.98805	8.44718	1.61568e-08	4.74506e-07	9.2128
KCNT1	1.10307	2.0691	6.44977	1.37072e-06	1.82905e-05	5.14065
CHN2	1.10377	5.57889	7.26198	2.11525e-07	3.87367e-06	6.63645
PACSIN3	1.10385	7.19226	11.6947	3.51064e-11	3.92061e-09	15.4486
LDHA	1.11203	9.32899	6.74745	6.84404e-07	1.02315e-05	5.32283
CLDN2	1.114	4.20367	6.54723	1.09062e-06	1.51045e-05	5.01133
GOT1	1.11499	7.43426	9.84036	9.95088e-10	4.84784e-08	12.0011
SHTN1	1.12011	4.62516	9.1751	3.65075e-09	1.39979e-07	10.7641
RAP1GAP1	1.12114	1.96229	4.01807	0.000534582	0.00274313	-0.494814
NEBL	1.12173	9.32563	7.1992	2.43662e-07	4.37429e-06	6.45672
CCL17	1.12553	0.173315	4.23096	0.000314445	0.00176955	-0.0151879
MGAT4B	1.1267	7.58327	7.55779	1.09387e-07	2.26109e-06	7.19136
HACD1	1.13173	6.14244	9.76549	1.14866e-09	5.42578e-08	11.8654
TLL1	1.13484	3.29953	4.01861	0.000533874	0.00274063	-0.908453
SORBS1	1.13699	8.08396	10.0665	6.47711e-10	3.53168e-08	12.4426
MATN4	1.14307	2.00604	4.7545	8.50416e-05	0.000592525	0.85198
CELA2A	1.14414	0.557097	3.50502	0.00189662	0.00789387	-1.38135
TSPAN15L	1.14661	1.34401	5.3179	2.10161e-05	0.000182193	2.49437
PHYH	1.14701	4.83893	10.0619	6.53355e-10	3.54438e-08	12.5175
SOCS1	1.15494	3.81052	9.93289	8.34141e-10	4.28204e-08	12.4751
DEXI	1.15811	1.15185	6.54786	1.08901e-06	1.50991e-05	5.60336
DUSP3	1.16137	5.44873	10.2225	4.83429e-10	2.92958e-08	12.7653
AOC3	1.1614	5.15658	8.7424	8.76467e-09	2.87292e-07	9.82201
MT4	1.17009	6.88237	4.28828	0.00027251	0.0015692	-0.658471
KIF21A	1.17103	5.1832	9.17796	3.62991e-09	1.39979e-07	10.7967
TGM4	1.17303	4.19992	2.30957	0.0301978	0.0741454	-4.58865
SPERT	1.181	3.31539	2.57715	0.0168197	0.0464439	-4.19415
SALL4	1.18113	2.70905	7.31954	1.85885e-07	3.45179e-06	7.15479
LHCGR	1.18148	0.548819	3.48196	0.00200641	0.0082727	-1.62234
KIF25	1.18297	2.37157	8.97957	5.40686e-09	1.96402e-07	10.6466
SRCIN1	1.18383	4.09956	5.30762	2.15558e-05	0.000186093	2.07813
DYRK3	1.18562	6.49675	9.51132	1.87954e-09	8.25072e-08	11.3463
BMPR1B	1.18828	0.58277	6.26716	2.10989e-06	2.61328e-05	4.95267
AIM1	1.18838	3.97511	3.52897	0.00178886	0.00753079	-2.17283
PLA1A	1.19697	2.1517	5.28717	2.267e-05	0.000194361	2.45673
PAWR	1.19873	5.62002	10.4381	3.24233e-10	2.16556e-08	13.1727
AMPD3	1.19887	3.88167	4.52107	0.000152321	0.000956668	0.377074
CPZ	1.20176	4.96397	7.59479	1.0081e-07	2.11906e-06	7.33499
NEGR1	1.20345	2.05178	4.87718	6.26415e-05	0.000455352	1.27963
GJA5	1.20796	6.93393	5.93893	4.6244e-06	5.09751e-05	3.39347
ZNF536	1.20826	0.236725	3.82656	0.000859958	0.00406981	-0.871498
SOX17	1.20992	2.8411	2.79979	0.0101525	0.0309735	-3.34431
GREB1L	1.21064	3.52353	7.73429	7.42136e-08	1.62031e-06	7.82849
PI16	1.21624	3.57134	4.06577	0.000474734	0.00249371	-1.26593
PAK5	1.21674	2.4295	5.80608	6.37381e-06	6.64277e-05	3.60622
DHRS7C	1.21679	3.10401	7.00777	3.76235e-07	6.28221e-06	6.23997
GJD2	1.21801	1.015	5.62924	9.79601e-06	9.55977e-05	3.2185
PPM1H	1.22019	2.47729	5.57391	1.12125e-05	0.000107479	3.05109
SHROOM1	1.22188	2.1232	3.26574	0.00338724	0.0127398	-2.31172
HSPB7L	1.22689	7.87403	9.71919	1.25571e-09	5.77767e-08	11.7906
AFAP1L1	1.22809	6.21999	9.94599	8.13633e-10	4.22716e-08	12.2038
GRAMD4	1.2295	5.86027	10.0675	6.46577e-10	3.53168e-08	12.4647
CACNG4	1.23635	2.30503	8.14609	3.05078e-08	8.00329e-07	8.9467
LMOD1	1.23889	5.05336	7.34976	1.73723e-07	3.26006e-06	6.85825
CLEC3B	1.23916	2.45222	7.6672	8.59635e-08	1.83492e-06	7.80636
MYH1C	1.23992	4.08745	6.1281	2.93777e-06	3.4758e-05	4.04473
GLUL	1.24105	6.46499	10.331	3.95131e-10	2.49173e-08	12.9443
ACAA2	1.24509	6.62566	9.05303	4.66241e-09	1.71364e-07	10.4166
TDH	1.25194	4.57269	9.1461	3.86846e-09	1.46484e-07	10.6229
HPX	1.25242	5.06661	2.94402	0.00726649	0.0237307	-3.55702
COCH	1.25393	0.692515	2.43604	0.0229735	0.0597821	-3.41372
FHL2	1.25486	8.3809	7.78874	6.5898e-08	1.47771e-06	7.78793
SCARA5	1.25552	2.22924	6.31235	1.89561e-06	2.39078e-05	4.72641
PRKCH	1.25738	1.498	6.34831	1.74106e-06	2.23905e-05	5.09553
TEDC1	1.25779	5.3584	4.90797	5.802e-05	0.000426751	0.867673
STC1	1.27107	4.28905	3.35815	0.00271044	0.0106391	-2.09943
TNFRSF11B	1.27524	3.79447	5.46607	1.46001e-05	0.000134154	2.833
FGF14	1.27904	1.0203	5.17804	2.96842e-05	0.00024454	2.33411
AKAP6	1.27968	3.32239	5.68371	8.57875e-06	8.52167e-05	3.07153
TMEM82	1.28133	2.16943	7.3973	1.56218e-07	2.96743e-06	7.32279
FBXL22	1.28799	5.19412	9.40737	2.30425e-09	9.76985e-08	11.1598
MYL9	1.28799	8.8877	12.1355	1.67576e-11	2.34053e-09	16.2353
TESPA1	1.29003	3.49475	7.49421	1.25922e-07	2.52493e-06	7.19616
TNNC1	1.29097	10.4514	8.36246	1.92975e-08	5.56111e-07	9.09822
FGF16	1.29623	0.501888	7.81988	6.15795e-08	1.42918e-06	8.3712
GJB3	1.2998	1.39908	7.58568	1.02854e-07	2.15473e-06	7.55705
EPAS1	1.3022	6.69987	9.22009	3.3376e-09	1.32048e-07	10.7613
SCG2	1.30285	6.03216	7.46399	1.34659e-07	2.63859e-06	7.07364
FBP2	1.3059	1.09514	6.06384	3.42581e-06	3.93699e-05	4.39331
MYL6	1.30677	10.0104	12.4609	9.8314e-12	1.56584e-09	16.8091
MGARP	1.30684	4.17475	6.86158	5.25926e-07	8.15677e-06	5.9802
GRK5	1.30751	2.62117	8.05399	3.71459e-08	9.48141e-07	8.81514
MCTP1	1.31101	3.7729	4.85843	6.56355e-05	0.000476001	1.23482
PLG	1.31401	0.138283	5.34309	1.97521e-05	0.00017256	2.8134
sox17	1.31942	0.121233	2.18272	0.0394809	0.0919175	-4.08235
ACOT6	1.32189	6.02108	8.66028	1.03781e-08	3.28896e-07	9.60179
EDNRB2	1.3259	2.61914	2.90405	0.00797644	0.0255588	-3.05079
TMOD1	1.33073	8.29697	6.43824	1.4084e-06	1.87329e-05	4.65128
AVDL	1.33594	2.78467	4.05529	0.000487284	0.00254564	-0.627629
CDO1	1.33776	3.54094	7.75028	7.1666e-08	1.57576e-06	7.81667
CACNA2D3	1.33926	0.0534319	2.34326	0.0280927	0.0699109	-3.79204
SLC25A4	1.341	8.90152	11.8786	2.57208e-11	3.0724e-09	15.7775
ADAMTS20	1.34367	4.77731	6.95556	4.23914e-07	6.88898e-06	5.93046
OCM3	1.34694	1.83757	6.36422	1.67685e-06	2.17053e-05	4.9815
TMEM52	1.34758	4.32347	6.2062	2.43874e-06	2.97024e-05	4.50821
LRRC2	1.35007	1.39139	3.86652	0.000778923	0.00375789	-0.82655
EPB41L4B	1.35083	4.54768	8.51031	1.41622e-08	4.27031e-07	9.34134
EMILIN3	1.35553	4.54217	6.55002	1.08352e-06	1.50397e-05	4.9913
PPIF	1.35671	4.79354	14.3894	5.10764e-13	1.54761e-10	19.8093
URAH	1.35988	2.44182	9.03036	4.88015e-09	1.78838e-07	10.8005
SLC24A2	1.36472	0.260173	4.5611	0.000137822	0.000879386	1.02593
SOWAHA	1.3652	0.0817109	2.93277	0.00745996	0.0242056	-2.73149
NOS1	1.37103	1.79156	3.91807	0.000685424	0.00337362	-1.21177
GIPC2	1.37123	3.3148	10.1294	5.75511e-10	3.34092e-08	12.9644
FGF18	1.37932	2.21315	7.10817	2.994e-07	5.24604e-06	6.63438
PCDH20	1.37981	2.46417	5.72356	7.78648e-06	7.85602e-05	3.44206
SLC38A3	1.38021	3.9222	2.73654	0.0117356	0.0346876	-3.50784
RDH10	1.38197	6.7798	9.19382	3.51689e-09	1.36532e-07	10.7202
MEGF6	1.39374	2.80225	4.9213	5.61275e-05	0.00041529	1.2937
SQOR	1.40013	5.05336	10.4416	3.22109e-10	2.16556e-08	13.255
TMEM158	1.40295	4.79889	7.91117	5.05186e-08	1.221e-06	8.15553
LRP2	1.40308	3.87801	11.2157	8.02431e-11	7.38415e-09	14.6298
ADCY7	1.40668	0.483516	4.63106	0.000115727	0.000761481	0.958611
PDHA2	1.40722	7.3922	10.6633	2.14855e-10	1.61766e-08	13.5726
RBM24	1.40814	7.9632	6.68572	7.89724e-07	1.15285e-05	5.2157
CYP3A4	1.4097	3.40231	7.86185	5.62141e-08	1.32766e-06	8.20361
SGK494	1.42439	3.6031	2.23272	0.0355496	0.0844905	-4.25412
UBXN2A	1.43487	6.6172	14.75	3.04362e-13	1.02192e-10	20.2901
SCEL	1.43691	3.48327	9.2005	3.4704e-09	1.35575e-07	10.8395
PLPPR1	1.44164	5.58509	8.57868	1.22863e-08	3.7874e-07	9.42922
SNTG2	1.44423	0.0921145	6.58388	1.00109e-06	1.41697e-05	5.61119
ACTC1	1.44707	11.9013	9.86464	9.49976e-10	4.6884e-08	12.2122
MYBPC3	1.4546	10.8427	10.0866	6.23667e-10	3.48808e-08	12.612
MMP9	1.45511	3.20468	4.06729	0.000472943	0.0024864	-0.329955
ARHGAP18	1.45899	5.51	12.304	1.26989e-11	1.87807e-09	16.4718
MKX	1.46365	4.00401	5.89757	5.10925e-06	5.51453e-05	3.68456
PKP2	1.46641	7.15892	12.7251	6.42564e-12	1.10529e-09	17.1644
PROX1	1.47804	3.14185	5.58351	1.09527e-05	0.000105477	3.08534
SESTD1	1.48043	7.24978	14.7693	2.96153e-13	1.02192e-10	20.3129
FMO3	1.4868	3.13558	4.60633	0.000123099	0.0007999	0.445672
SMPX	1.48852	7.68906	11.3097	6.80879e-11	6.55702e-09	14.7581
PARK2	1.49325	2.97953	10.9844	1.20693e-10	9.99578e-09	14.5006
SYNDIG1	1.49338	0.234108	3.41533	0.00235958	0.00949565	-1.7964
LPAR4	1.49486	5.74619	15.9529	5.81834e-14	2.78005e-11	21.9646
INPP5J	1.50025	3.50353	5.86285	5.55607e-06	5.91457e-05	3.76842
ATP6AP1L	1.5163	1.16677	4.094	0.000442494	0.00235624	-0.30063
FBXL2	1.51854	4.45887	11.4547	5.29572e-11	5.48239e-09	15.0983
CCDC141	1.51877	8.79342	6.95359	4.25827e-07	6.89706e-06	5.9004
ITGA11	1.52629	3.5626	7.64799	8.9668e-08	1.90744e-06	7.50914
SLC25A34	1.52828	3.26542	7.87889	5.41752e-08	1.29427e-06	8.32561
CHST15	1.54594	4.5456	9.46839	2.04415e-09	8.81754e-08	11.5753
GADD45B	1.5484	5.78546	7.5315	1.15935e-07	2.37667e-06	7.33452
LRFN3	1.55024	1.70059	5.59424	1.06695e-05	0.000103069	3.3511
MYH7	1.55708	10.6584	7.03125	3.56623e-07	6.02435e-06	6.15588
ACADSB	1.56216	6.76966	11.4053	5.76767e-11	5.8731e-09	14.9294
NRP1	1.56302	4.94886	8.89083	6.47246e-09	2.265e-07	10.1813
RASL11B	1.57322	5.8289	10.3739	3.64935e-10	2.3369e-08	13.0401
ACCSL	1.57509	3.23071	5.78851	6.65099e-06	6.8797e-05	3.56733
BDH1A	1.57847	7.99771	18.3141	3.00798e-15	3.46651e-12	24.9774
CA9	1.57909	6.26288	8.08051	3.50943e-08	9.05807e-07	8.36619
GABRG1	1.57913	0.733692	4.9316	5.47068e-05	0.000407447	1.76914
RGS1	1.57948	2.6663	2.81466	0.00981078	0.0301981	-2.96136
RAB26	1.5865	3.73049	11.2764	7.21641e-11	6.79163e-09	14.9787
CYBRD1	1.59266	2.11334	8.69008	9.75997e-09	3.12495e-07	10.0868
MAP3K20	1.60652	5.36325	7.91557	5.00405e-08	1.21654e-06	8.12724
POPDC2	1.61072	8.42581	9.77287	1.13249e-09	5.36981e-08	11.9012
PTPRT	1.61696	0.106645	5.7707	6.94444e-06	7.14162e-05	3.84605
SLC4A5	1.617	0.746773	5.36363	1.87779e-05	0.000165296	2.8357
IL1RAPL2	1.62483	1.11802	7.13097	2.84312e-07	5.0242e-06	6.87979
PTGER2	1.62642	2.90591	7.12378	2.88986e-07	5.09953e-06	6.8443
NINJ2	1.63868	4.67988	5.98438	4.14542e-06	4.63534e-05	3.75277
MYLK4	1.65014	3.36915	5.65497	9.20053e-06	9.03543e-05	3.03439
ELN	1.66641	9.02872	7.79593	6.48736e-08	1.46532e-06	7.8237
NPR3	1.66851	3.79041	8.03173	3.89623e-08	9.89833e-07	8.34614
B3GAT2	1.67867	1.86461	5.5254	1.26248e-05	0.000119087	3.06624
SALL1	1.68527	1.96643	9.14539	3.87399e-09	1.46484e-07	11.0974
STOM	1.6895	3.58672	14.4009	5.02317e-13	1.54761e-10	19.8853
SCN5A	1.70068	6.74696	9.54029	1.77622e-09	7.85267e-08	11.4114
PACRG	1.70323	2.36938	7.16596	2.62665e-07	4.67491e-06	6.90146
ALPK2	1.70382	2.87112	7.81028	6.28795e-08	1.43858e-06	8.04606
SERPINE2	1.70729	9.47444	17.0956	1.3276e-14	9.48209e-12	23.4989
AIFM3	1.70881	2.63504	8.26216	2.38436e-08	6.59709e-07	9.05815
SEMA3B	1.71263	4.8035	5.92229	4.81358e-06	5.26864e-05	3.56665
C7orf62	1.71506	0.140575	7.96085	4.53802e-08	1.12302e-06	8.71315
NRAP	1.71675	3.91031	3.97687	0.000592278	0.00297889	-0.634191
HPGD	1.73594	4.27989	12.9778	4.30521e-12	8.10358e-10	17.6724
NRXN3	1.76398	4.04821	9.08726	4.35253e-09	1.61407e-07	10.7122
CD164	1.78726	8.34886	15.351	1.31371e-13	5.26459e-11	21.1629
PTPRO	1.79101	2.845	10.4316	3.28094e-10	2.17963e-08	13.3825
NANOS1	1.79545	6.38325	9.87058	9.39263e-10	4.66739e-08	12.0788
SLC2A5	1.81997	0.974407	4.66842	0.000105421	0.000709715	1.16664
CDH13	1.84779	5.77765	7.96174	4.52927e-08	1.12302e-06	8.27897
MYL3	1.84982	11.5986	15.536	1.02e-13	4.22383e-11	21.4845
CRIP2	1.85329	8.79811	10.3016	4.17301e-10	2.57917e-08	12.9441
NADB-LER2	1.85477	0.943367	8.91592	6.15088e-09	2.18321e-07	10.6527
ABCC8	1.85576	4.17262	8.34766	1.99076e-08	5.65933e-07	9.07223
PHYHIPL	1.86487	0.0720388	5.88611	5.25253e-06	5.62519e-05	4.05764
RPH3A	1.87538	1.23763	7.89934	5.18287e-08	1.24781e-06	8.58258
MYLK3	1.89225	6.98164	12.3706	1.13888e-11	1.77364e-09	16.5838
EMCN	1.8923	5.24427	15.2042	1.60884e-13	6.05655e-11	20.9519
C4H4orf54	1.90863	3.05475	10.0755	6.3687e-10	3.53168e-08	12.749
MAOA	1.91344	4.30118	13.7832	1.24908e-12	2.92779e-10	18.8854
DSC1	1.91648	2.98939	8.70733	9.4194e-09	3.03941e-07	10.1668
OTOGL	1.92551	0.475459	7.432	1.44591e-07	2.79355e-06	7.59359
UPP1	1.93268	4.02594	8.73666	8.86856e-09	2.89171e-07	10.1305
PLEKHA7	1.94787	5.98904	12.6953	6.73953e-12	1.13142e-09	17.1304
FAM81A	1.98755	1.31704	3.28431	0.00323926	0.0123213	-1.91536
TMEM163	1.9915	5.3495	10.5553	2.61536e-10	1.90004e-08	13.4065
KCNJ3	1.99156	3.00996	6.14964	2.79057e-06	3.32799e-05	4.51637
ACMSD	1.99873	1.05674	11.2944	6.9934e-11	6.66495e-09	14.9671
NPTX1	2.00331	1.93219	3.46584	0.00208677	0.00856143	-1.50025
ENTPD1	2.02102	5.37722	10.2455	4.63183e-10	2.8282e-08	12.8468
VAT1L	2.03275	6.23936	14.0438	8.4712e-13	2.14771e-10	19.3157
CPN1	2.03875	3.88627	10.4743	3.03345e-10	2.10529e-08	13.4661
FHL1	2.05119	7.24408	14.7018	3.25982e-13	1.0657e-10	20.2148
PTGS2	2.05227	6.85594	9.7373	1.21266e-09	5.64228e-08	11.8588
SLC18A2	2.05941	3.34657	11.9227	2.38861e-11	2.93799e-09	16.0268
PYGB	2.06969	7.07803	14.2159	6.57647e-13	1.89999e-10	19.5021
KLHL34	2.08345	3.70625	10.3137	4.08016e-10	2.53439e-08	13.2307
EXFABP	2.09804	6.01889	4.76827	8.21709e-05	0.000576078	1.00009
GJA8	2.09909	5.46302	12.5589	8.39083e-12	1.38986e-09	16.912
LYPD1	2.1091	4.5448	7.89591	5.22148e-08	1.25467e-06	8.08189
BMP8A	2.13215	0.568195	7.00555	3.78152e-07	6.2973e-06	6.65881
KCNJ11	2.13649	2.7208	9.212	3.39176e-09	1.33341e-07	11.1746
PTGDR	2.14503	2.45788	7.55603	1.09815e-07	2.26616e-06	7.7816
ALDH1L2	2.18832	6.25737	13.5248	1.84617e-12	4.16999e-10	18.4524
RPL3L	2.22283	0.817771	10.5445	2.66725e-10	1.91533e-08	13.6252
CACNA1S	2.22956	0.644047	7.143	2.76673e-07	4.91016e-06	6.93358
TRPV4	2.25903	0.543024	6.78674	6.24959e-07	9.44509e-06	6.17906
G6PC	2.26371	0.201619	10.092	6.17332e-10	3.48808e-08	12.8361
KCNG1	2.29112	0.0761801	9.1447	3.87935e-09	1.46484e-07	11.1179
S100Z	2.30317	0.0148983	7.13378	2.82511e-07	5.00662e-06	6.953
GSTT1	2.31521	4.92892	5.95129	4.48888e-06	4.96133e-05	3.9888
SEMA3C	2.32351	3.1044	8.43531	1.65629e-08	4.83007e-07	9.52863
SPON2	2.32558	1.94342	10.0915	6.18004e-10	3.48808e-08	12.8817
CAMK2A	2.34716	3.73943	12.2338	1.42498e-11	2.05843e-09	16.523
MTUS1	2.40347	6.07081	18.7798	1.74454e-15	2.70905e-12	25.5291
CFC1	2.42707	4.37101	11.7224	3.34901e-11	3.85229e-09	15.5691
FAM19A2	2.43692	3.70422	10.2084	4.96376e-10	2.99343e-08	12.9183
NRN1L	2.44142	1.56321	7.97269	4.42362e-08	1.1013e-06	8.73095
HHATL	2.45273	2.14912	11.5934	4.17228e-11	4.58693e-09	15.5549
DMGDH	2.47688	2.13374	18.297	3.06944e-15	3.46651e-12	24.9605
MB	2.47875	5.39666	6.69247	7.77434e-07	1.13761e-05	5.48745
KLHL40	2.48647	2.36362	6.39849	1.54661e-06	2.02888e-05	5.29434
DRAXIN	2.49429	5.67771	9.93883	8.24772e-10	4.25151e-08	12.4023
METTL21EP	2.49879	1.84792	11.6907	3.53464e-11	3.92061e-09	15.7139
PLN	2.50806	6.89842	12.3612	1.15644e-11	1.77364e-09	16.6444
LRFN5	2.51247	3.70211	12.0305	1.99478e-11	2.55476e-09	16.2492
TACR1	2.53605	1.08449	6.48188	1.27112e-06	1.71829e-05	5.40749
VCAM1	2.61875	5.1021	9.56902	1.67956e-09	7.45185e-08	11.4971
CLEC3A	2.62537	0.821034	5.20757	2.75939e-05	0.000230066	2.60021
AGTR1	2.68399	1.88785	5.43673	1.56901e-05	0.000141965	3.00385
PFKM	2.70224	4.255	12.1201	1.71911e-11	2.37295e-09	16.3822
HS3ST3B1L	2.7204	1.91787	16.0679	4.99408e-14	2.48166e-11	22.0287
GADL1	2.75289	0.324334	10.5063	2.86042e-10	2.00763e-08	13.5512
MAMDC2	2.75353	2.08896	12.8313	5.4264e-12	9.70473e-10	17.5652
ADCYAP1	2.77982	7.51963	17.705	6.24846e-15	5.17498e-12	24.24
MYL10	2.83281	3.88112	10.4659	3.08074e-10	2.11448e-08	13.5486
GREM1	2.87548	2.16841	6.80353	6.01196e-07	9.12521e-06	6.08344
ZNF106	2.98482	5.79597	13.9035	1.04335e-12	2.54148e-10	19.076
NKX2-5	2.99334	6.32543	8.1732	2.87966e-08	7.64401e-07	8.66621
SALL3	3.05241	2.76519	16.2721	3.81704e-14	1.97579e-11	22.4138
LY6CLEL	3.12283	0.624964	7.72469	7.57879e-08	1.6381e-06	8.19836
HAND1	3.13131	4.26855	12.1351	1.67679e-11	2.34053e-09	16.3983
LRRC3B	3.24086	3.76356	15.0409	2.0198e-13	7.17709e-11	20.8339
IRX5	3.27734	0.33983	11.6969	3.49742e-11	3.92061e-09	15.3591
IRX3	3.27847	0.898887	12.9932	4.20196e-12	8.03092e-10	17.5292
SLC24A5	3.27946	0.877319	8.20046	2.71753e-08	7.30733e-07	9.1737
CYLY	3.30436	1.40807	3.1872	0.00408898	0.01484	-1.90489
RASGRF1	3.31856	3.5679	11.1702	8.69098e-11	7.85628e-09	14.842
CTNNA3	3.34983	6.11848	18.3263	2.96477e-15	3.46651e-12	25.0108
CKMT2	3.42634	0.547225	7.5269	1.17123e-07	2.39313e-06	7.79352
ACTG2	3.5557	5.34681	9.68961	1.32945e-09	6.04972e-08	12.0537
EDNRB	3.63797	6.09217	12.3401	1.19695e-11	1.81338e-09	16.5957
BHMT2	3.65612	3.52248	24.4703	5.13728e-18	6.38205e-14	31.2671
VEGFD	3.90525	1.86918	10.0845	6.26131e-10	3.48808e-08	12.9004
NKX2-3	3.91638	1.83351	7.26157	2.11722e-07	3.87367e-06	7.219
IRX6	4.29519	0.895931	13.8672	1.10146e-12	2.63144e-10	18.7486
DGKI	4.62219	0.711505	15.7476	7.65829e-14	3.39782e-11	20.6852
NPPA	4.7415	10.1197	21.4087	9.92155e-17	4.10851e-13	28.4144
CNP3	4.78577	1.52548	6.43886	1.40633e-06	1.87255e-05	5.3973
KCNH7	4.85244	3.28918	11.155	8.9259e-11	7.86428e-09	14.7933
NTN1	5.36402	4.506	14.1826	6.90529e-13	1.9317e-10	19.6129
BMP10	5.38214	5.76579	16.36	3.40279e-14	1.83795e-11	22.609

## Sheet: t=0 Diff Exp Ion Channels
geneID	Entrez Gene Name	Expr Log Ratio	Expr p-value	Expr False Discovery Rate (q-value)	Location	Type(s)
GABRA3	gamma-aminobutyric acid type A receptor subunit alpha3	-4.499	2.23e-07	4.05e-06	Plasma Membrane	ion channel
ASIC2	acid sensing ion channel subunit 2	-3.635	1.63e-05	0.000147	Plasma Membrane	ion channel
HCN4	hyperpolarization activated cyclic nucleotide gated potassium channel 4	-3.468	9.07e-16	2.03e-12	Plasma Membrane	ion channel
TRPC4	transient receptor potential cation channel subfamily C member 4	-3.181	5.13e-07	8.02e-06	Plasma Membrane	ion channel
GRIK2	glutamate ionotropic receptor kainate type subunit 2	-3.015	3.59e-07	6.04e-06	Plasma Membrane	ion channel
CACNA1D	calcium voltage-gated channel subunit alpha1 D	-2.525	6.16e-08	1.43e-06	Plasma Membrane	ion channel
KCNJ8	potassium inwardly rectifying channel subfamily J member 8	-2.371	2.02e-12	4.48e-10	Plasma Membrane	ion channel
KCNMA1	potassium calcium-activated channel subfamily M alpha 1	-2.281	6.48e-08	1.47e-06	Plasma Membrane	ion channel
ANO6	anoctamin 6	-2.179	3.97e-09	1.49e-07	Plasma Membrane	ion channel
KCNK3	potassium two pore domain channel subfamily K member 3	-2.109	0.000208	0.00124	Plasma Membrane	ion channel
ANO1	anoctamin 1	-2.034	4.71e-07	7.49e-06	Plasma Membrane	ion channel
GABRA5	gamma-aminobutyric acid type A receptor subunit alpha5	-1.965	1.39e-05	0.000128	Plasma Membrane	ion channel
HCN1	hyperpolarization activated cyclic nucleotide gated potassium channel 1	-1.88	7.92e-07	1.15e-05	Plasma Membrane	ion channel
CACNA1H	calcium voltage-gated channel subunit alpha1 H	-1.857	3.55e-09	1.38e-07	Plasma Membrane	ion channel
KCNK10	potassium two pore domain channel subfamily K member 10	-1.747	0.000159	0.000993	Plasma Membrane	ion channel
KCNV1	potassium voltage-gated channel modifier subfamily V member 1	-1.62	2.43e-08	6.68e-07	Plasma Membrane	ion channel
GABRA1	gamma-aminobutyric acid type A receptor subunit alpha1	-1.618	0.00236	0.00951	Plasma Membrane	ion channel
CACNA1G	calcium voltage-gated channel subunit alpha1 G	-1.608	2.44e-11	2.94e-09	Plasma Membrane	ion channel
CACFD1	calcium channel flower domain containing 1	-1.524	1.46e-11	2.08e-09	Plasma Membrane	ion channel
GRIK4	glutamate ionotropic receptor kainate type subunit 4	-1.484	1.11e-05	0.000107	Plasma Membrane	ion channel
SCN11A	sodium voltage-gated channel alpha subunit 11	-1.448	0.00293	0.0114	Plasma Membrane	ion channel
KCNQ5	potassium voltage-gated channel subfamily Q member 5	-1.406	4.95e-05	0.000376	Plasma Membrane	ion channel
TRPC6	transient receptor potential cation channel subfamily C member 6	-1.389	6.54e-07	9.83e-06	Plasma Membrane	ion channel
KCNK5	potassium two pore domain channel subfamily K member 5	-1.238	0.0101	0.0308	Plasma Membrane	ion channel
KCNF1	potassium voltage-gated channel modifier subfamily F member 1	-1.155	0.000254	0.00148	Plasma Membrane	ion channel
KCNE4	potassium voltage-gated channel subfamily E regulatory subunit 4	-1.1	7.25e-07	1.07e-05	Plasma Membrane	ion channel
CACNA1F	calcium voltage-gated channel subunit alpha1 F	-1.067	0.00676	0.0224	Plasma Membrane	ion channel
GRID1	glutamate ionotropic receptor delta type subunit 1	-1.063	0.000119	0.000781	Plasma Membrane	ion channel
TMEM63A	transmembrane protein 63A	-1.057	6.65e-09	2.32e-07	Plasma Membrane	ion channel
ASIC1	acid sensing ion channel subunit 1	-1.019	1.48e-05	0.000135	Plasma Membrane	ion channel
KCNH2	potassium voltage-gated channel subfamily H member 2	-1.008	1.88e-06	2.38e-05	Plasma Membrane	ion channel
GRIA3	glutamate ionotropic receptor AMPA type subunit 3	-0.981	5.29e-05	0.000396	Plasma Membrane	ion channel
KCNC2	potassium voltage-gated channel subfamily C member 2	-0.977	0.000159	0.000995	Plasma Membrane	ion channel
NOX5	NADPH oxidase 5	-0.971	0.00446	0.0159	Cytoplasm	ion channel
GRIA1	glutamate ionotropic receptor AMPA type subunit 1	-0.919	0.0189	0.0509	Plasma Membrane	ion channel
KCNA4	potassium voltage-gated channel subfamily A member 4	-0.914	0.00301	0.0116	Plasma Membrane	ion channel
CACNA1E	calcium voltage-gated channel subunit alpha1 E	-0.882	0.000834	0.00397	Plasma Membrane	ion channel
ABCC9	ATP binding cassette subfamily C member 9	-0.88	4.57e-05	0.000351	Plasma Membrane	ion channel
RYR3	ryanodine receptor 3	-0.877	0.000643	0.0032	Plasma Membrane	ion channel
XPR1	xenotropic and polytropic retrovirus receptor 1	-0.86	1.79e-10	1.4e-08	Plasma Membrane	ion channel
GRIK1	glutamate ionotropic receptor kainate type subunit 1	-0.834	0.00244	0.00973	Plasma Membrane	ion channel
GLRB	glycine receptor beta	-0.833	0.0487	0.109	Plasma Membrane	ion channel
CLCN2	chloride voltage-gated channel 2	-0.821	0.0297	0.0733	Plasma Membrane	ion channel
TMEM37	transmembrane protein 37	-0.799	0.000127	0.000818	Plasma Membrane	ion channel
TRPV2	transient receptor potential cation channel subfamily V member 2	-0.774	2.88e-06	3.43e-05	Plasma Membrane	ion channel
TMEM150C	transmembrane protein 150C	0.766	0.000411	0.00222	Plasma Membrane	ion channel
TMEM120A	transmembrane protein 120A	0.788	1.46e-06	1.92e-05	Plasma Membrane	ion channel
CACNB4	calcium voltage-gated channel auxiliary subunit beta 4	0.801	0.00503	0.0175	Plasma Membrane	ion channel
P2RX5	purinergic receptor P2X 5	0.83	3.77e-05	0.0003	Plasma Membrane	ion channel
KCNH6	potassium voltage-gated channel subfamily H member 6	1.002	7.77e-07	1.14e-05	Plasma Membrane	ion channel
KCNG2	potassium voltage-gated channel modifier subfamily G member 2	1.069	0.00173	0.00733	Plasma Membrane	ion channel
KCNT1	potassium sodium-activated channel subfamily T member 1	1.103	1.37e-06	1.83e-05	Plasma Membrane	ion channel
CACNG4	calcium voltage-gated channel auxiliary subunit gamma 4	1.236	3.05e-08	8e-07	Plasma Membrane	ion channel
GABRG1	gamma-aminobutyric acid type A receptor subunit gamma1	1.579	5.47e-05	0.000407	Plasma Membrane	ion channel
SCN5A	sodium voltage-gated channel alpha subunit 5	1.701	1.78e-09	7.85e-08	Plasma Membrane	ion channel
KCNJ3	potassium inwardly rectifying channel subfamily J member 3	1.992	2.79e-06	3.33e-05	Plasma Membrane	ion channel
KCNJ11	potassium inwardly rectifying channel subfamily J member 11	2.136	3.39e-09	1.33e-07	Plasma Membrane	ion channel
KCNH7	potassium voltage-gated channel subfamily H member 7	4.852	8.93e-11	7.86e-09	Plasma Membrane	ion channel

## Sheet: CN03 V Veh Ion Channels
	Atria Log2_Expr												SAN Log2_Expr
geneID	Atria_t0_1	Atria_t0_2	Atria_t0_3	Atria_t0_4	Atria_veh_1	Atria_veh_2	Atria_veh_3	Atria_veh_4	Atria_Cn03_1	Atria_Cn03_2	Atria_Cn03_3	Atria_Cn03_4	SAN_t0_1	SAN_t0_2	SAN_t0_3	SAN_t0_4	SAN_veh_1	SAN_veh_2	SAN_veh_3	SAN_veh_4	SAN_Cn03_1	SAN_Cn03_2	SAN_Cn03_3	SAN_Cn03_4
CACNA1C	4.8675	3.9845	4.54418	4.58046	5.15995	5.5635	5.00017	5.07451	5.16966	5.59882	5.33035	5.36414	4.20699	4.22493	3.89759	3.91809	3.45429	4.27444	4.03174	4.46252	4.56168	5.50714	5.35056	5.09887
CACNA1D	2.71533	2.29182	2.82595	3.25591	2.09303	1.82137	2.47509	2.09197	0.967324	0.9601	0.799677	1.1153	5.48215	4.74484	4.87802	5.97786	4.78508	4.35197	5.04289	5.74114	2.55735	2.81825	2.06722	2.93803
CACNA1G	3.47872	3.94337	3.55542	3.79831	2.61794	2.69334	3.04968	2.51939	0.674845	0.552415	0.971154	1.05171	5.16166	5.2869	5.36839	5.39943	3.94638	4.03129	4.299	3.82101	1.58953	2.61749	2.62661	2.56016
CACNA1H	2.34089	1.64076	1.96463	1.895	2.55455	2.61186	2.72243	2.15574	2.17386	2.37843	2.47978	2.0047	4.13899	3.56474	3.52494	3.95346	4.18749	4.0304	4.20734	4.33599	3.42346	4.16684	3.81097	3.69346
HCN1	-0.145476	-1.00332	-0.403309	-0.353214	2.39507	2.10202	2.13376	2.17477	-0.726435	0.139084	-0.167976	-0.437671	1.14563	1.0163	1.20763	2.18719	2.31709	2.35452	2.5001	2.75828	1.02291	1.37221	1.07741	1.10653
HCN2	0.83303	0.809569	0.579248	0.882402	-0.245831	0.646015	0.62888	-0.0999794	0.201903	-0.695687	-1.23918	0.0683564	1.38295	1.25845	1.31007	1.05591	1.24495	0.820619	1.11822	0.303584	1.28213	0.518722	0.625724	0.124618
HCN4	3.23078	2.29833	2.99559	2.28824	2.63145	2.49693	2.30644	2.36009	0.483571	0.274323	0.898404	0.869506	6.08867	6.13791	6.18003	6.289	5.82373	5.98951	6.35692	6.20845	3.5886	3.99757	3.46144	3.2673
KCNJ5	5.92319	5.53863	5.581	5.78931	7.49989	7.2538	7.3917	7.43771	5.25642	4.50375	4.63727	4.72395	5.87348	5.62703	5.69776	6.16378	6.40458	6.20079	6.46934	7.02409	5.76137	5.74135	5.69292	5.4348
KCNJ8	3.4371	3.18377	3.45047	3.43244	5.96003	5.39758	5.45145	5.21343	3.84696	3.23209	3.38854	4.06692	5.83599	5.6943	5.5088	5.91893	6.12571	6.2874	6.39516	6.31638	3.78689	3.66208	4.2847	3.82907
KCNH2	3.64176	3.04371	3.81531	3.67576	5.43772	4.90464	5.18665	5.54132	3.61201	3.40403	3.44332	3.31091	4.36489	4.43202	4.6889	4.69868	5.26692	5.53369	5.33651	5.23269	3.57037	3.87556	3.42427	3.38912
KCNH7	6.94864	6.36883	6.78045	6.68151	6.92902	7.25935	7.12332	6.90637	3.77999	2.86903	3.33518	4.64182	3.53565	1.14547	1.56277	0.785451	1.65687	3.01895	0.93935	2.14406	-1.60912	1.33238	-2.55809	-2.31132
KCNK5	0.0631051	0.51414	0.226313	-0.353627	-0.723783	0.176539	-0.957489	-1.12265	2.19043	2.95357	3.23833	1.97857	1.27086	2.26431	1.31922	0.565981	0.361684	0.314572	-0.172352	-0.20925	2.42033	2.80417	3.57839	2.26227
KCNQ5	0.112658	0.797145	0.581163	0.456524	0.208485	1.3915	1.06706	0.846831	-1.08725	-0.536771	-0.301882	-0.750508	2.33616	1.82169	1.50227	1.74364	1.15869	1.53722	2.25956	1.37924	0.0555008	0.175429	0.989545	0.459616
KCNAB2	4.49758	4.41065	4.37824	4.30367	4.18093	4.37211	4.47335	4.38569	2.40797	2.60104	2.65628	2.6826	4.35584	4.49246	4.4743	4.32227	3.88978	3.83231	3.81849	3.63345	2.28833	2.85479	2.8334	2.75367
KCNV1	1.55928	1.70743	1.00075	1.34536	-1.38071	0.0446519	0.253766	-0.311934	-1.34667	-0.36722	-0.945997	-1.06562	2.85117	3.01754	3.28138	3.0469	1.79661	2.13765	1.84161	1.63261	1.01195	1.39182	1.77652	1.75467
KCNS3	-2.24826	-1.83558	-2.54531	-1.08586	0.56774	0.805638	1.5466	1.34141	0.635041	0.377038	0.636575	0.893937	-0.0367652	-0.856768	-0.760406	0.665052	2.06275	1.34191	2.44266	1.61125	2.3692	-0.0784652	0.691087	1.21215
KCNG4	-0.387329	-0.518805	0.0625707	0.209565	0.125789	0.907597	0.197166	0.147746	-2.45874	-1.74021	-2.98708	-1.82022	1.64128	2.54356	1.63338	1.17267	1.04029	1.18175	1.52562	1.06758	0.262766	-0.521344	0.217325	-0.0690549
KCNMA1	1.28631	0.800994	1.11566	1.14201	0.440522	1.3317	0.98424	0.875937	2.33703	2.76321	2.75603	1.47758	3.12971	4.01667	3.51273	2.84768	1.8915	1.97614	2.1252	1.45855	3.09074	2.73005	3.02149	2.83439
KCNF1	0.0503588	1.02671	0.993554	1.50742	2.05139	2.47438	2.46222	1.80933	0.202022	-0.00139283	-0.234273	0.631408	2.17036	2.20862	2.06541	1.60705	3.55641	3.70268	3.33419	3.86845	-0.000972535	1.04287	0.408991	0.162302
KCNE4	3.5899	4.17306	3.93674	4.07616	4.04761	4.77823	4.64267	4.52913	3.42368	3.26579	2.61691	3.51736	4.6581	5.23906	5.12898	5.16734	5.17697	5.35661	5.41084	5.5119	3.89372	4.01846	3.96452	4.14402
KCNK3	-1.00961	-2.99917	-3.22544	-1.25247	3.14803	2.61415	2.91311	3.14007	3.07239	2.27534	2.03249	2.32713	0.155945	-0.480528	-0.512473	0.42849	3.58395	3.57623	3.57843	3.55443	2.76991	2.57557	2.37791	2.75033
NKAIN3	-0.438705	-0.858173	-0.824122	-0.712205	-0.916251	0.553835	0.896043	-0.0549281	-0.419278	0.183701	-0.214597	0.0755056	1.59928	1.66108	1.3599	0.697829	2.1568	1.66015	2.03809	1.02742	0.327241	0.958339	1.0551	1.38737
SCN11A	-0.935852	-0.955411	-1.44498	-1.82605	-5.17078	-2.93835	-1.48899	-2.7275	-3.3278	-2.45346	-3.52832	-2.84352	-0.0889415	-0.0225536	0.0394005	0.697702	-0.847375	-0.799841	0.253215	-0.989635	-1.39975	-3.44418	-2.81318	-2.5141
SCN1A	0.966902	-0.625359	-0.120352	0.486126	-1.16178	-0.660163	-1.3318	-0.200358	-0.0927478	1.15551	0.643461	-1.20035	0.983749	-0.477076	0.500247	0.126582	-0.00945778	-0.374215	0.491278	0.357901	2.01767	2.61327	2.65436	1.999
SCN1B	2.01387	2.18485	2.02415	3.0204	3.70415	3.36076	3.51093	3.75751	3.7114	3.51447	3.39751	3.81042	2.19647	1.89143	2.23989	2.73476	3.46377	3.1257	3.08188	3.65579	3.38348	3.48865	3.42569	3.60185
SCN2B	4.25181	3.16936	4.20265	4.14041	4.95807	5.05118	5.07557	4.87181	0.00758238	0.0526303	-0.7588	0.648224	3.67708	3.72925	3.95835	4.2448	3.29281	3.53451	3.40548	3.11979	-3.26095	-1.03225	-2.0004	-0.238537
SCN3B	2.21821	2.4752	2.07651	2.34757	1.42209	0.990056	1.59732	1.32173	1.0928	0.899253	0.455168	1.05637	2.51107	2.54937	2.4756	2.28432	2.19036	1.71339	2.04518	1.27064	-0.356974	0.22997	0.321749	-0.1675
SCN4B	2.54027	1.08631	1.9704	2.23575	5.22032	5.14632	5.0935	5.26584	3.12881	2.27735	2.27475	3.24305	2.26647	2.05777	2.24236	2.24571	3.47373	3.59341	3.34882	3.2365	1.73055	1.83236	2.3316	2.18686
SCN5A	7.78671	7.16592	7.53136	7.93784	6.92095	6.8847	6.82525	6.86939	7.4301	7.01932	6.89119	7.56301	6.04033	5.73501	5.90022	5.94457	5.8814	6.1137	6.07228	6.85837	6.6581	6.897	6.54914	6.45581
SCN8A	2.16745	2.11632	2.00695	2.20219	1.86638	2.07328	2.05078	2.18638	2.94803	3.27392	3.70048	3.60675	2.37894	2.07357	1.80646	2.43358	2.72736	2.41785	2.65995	2.53898	2.53189	2.73071	2.83871	3.33553
SCN9A	1.85096	2.09713	1.84683	2.40897	1.5256	1.30285	1.76211	1.86383	0.985775	1.13706	0.874408	0.990967	2.93146	2.56688	2.42555	2.75561	2.54538	2.60017	3.52672	2.52088	2.92352	3.22309	3.47963	3.13953
GJA1	5.45906	5.84993	5.62425	5.36721	4.25774	4.65938	4.42503	4.52673	7.19213	7.50064	7.71152	7.01901	5.97133	5.765	5.5187	5.21792	5.88317	5.29111	5.37112	5.02374	7.29345	6.99908	7.41093	7.05986
GJA5	8.59057	7.88172	8.11744	8.06236	8.30498	8.26227	8.112	8.05131	6.6203	6.05907	5.89626	6.81601	7.15553	6.7521	6.92784	6.9855	6.45284	6.86136	6.97108	7.09173	5.25513	5.45989	5.3822	4.34977
GJA8	7.59549	6.98717	7.19958	7.15823	7.0874	6.80432	6.62429	6.96589	5.47399	5.16978	4.66504	5.70292	5.2429	4.8303	5.05407	5.40277	4.31849	4.80016	4.71646	4.88662	3.62085	3.7412	3.62827	3.45063
GJC3	14.0292	14.2743	14.5533	15.6574	15.2049	13.2819	15.0533	14.7672	15.7316	15.163	15.6635	16.1358	12.9598	13.4757	14.8805	14.7918	13.3747	14.2469	13.4601	14.9878	12.5099	15.1397	15.7031	15.213
GJC2	5.50219	5.53314	5.38656	4.9429	4.79516	5.22496	5.20993	4.95861	6.40148	6.48165	6.77261	6.26075	5.28257	5.27075	5.22168	4.88543	4.45417	4.65513	4.26731	4.04334	6.00942	6.1987	6.01278	5.88561
RYR1	5.86045	5.71116	5.65718	5.7566	6.19434	6.05692	6.31615	6.15922	5.08831	5.07503	4.93128	4.98621	6.19877	6.14392	6.31904	6.32125	6.27993	6.22323	6.04142	6.24834	5.50942	5.65732	5.36412	5.47576
RYR2	7.97716	7.50292	7.96604	7.87035	8.13622	7.98516	7.73656	7.91825	7.20074	6.93728	6.45175	7.0651	7.62679	7.29653	7.23837	7.75612	7.21686	7.30282	7.23134	8.01231	6.15261	6.77208	6.59922	6.19176
ATP2A2	10.8169	10.2322	10.7704	10.7609	11.2798	11.2022	10.9064	11.1794	10.0673	9.70364	9.67807	9.95038	10.6117	10.1259	10.4183	10.7026	10.4154	10.7423	10.6364	11.2643	9.32291	9.68955	9.59032	9.42909
PLN	6.66918	6.96808	6.83307	6.22917	8.85658	8.50192	8.60113	8.68381	8.5954	8.59691	8.3265	8.36203	3.8917	4.21423	4.21389	4.40303	7.19185	6.92408	6.58935	7.78774	6.3041	6.44941	6.3476	6.02815
SLC8A1	8.98743	7.92628	8.50024	8.4961	8.34216	8.37509	7.92714	7.95674	8.11095	7.78922	7.5548	7.70907	7.77485	7.90156	7.75914	7.76571	6.82308	7.4281	7.18176	7.8275	7.74363	8.3854	7.86855	7.59035
STIM1	4.38981	4.05308	4.23276	3.95447	4.31712	4.55528	4.51816	4.1285	5.28328	5.40739	5.3852	5.16663	4.20926	4.75662	4.71602	4.49129	4.81994	5.00248	4.46695	4.41997	5.57259	5.41694	5.4356	5.51951
STIM2	3.32582	3.25474	3.26795	2.93577	2.89467	3.05153	2.81963	3.00013	5.25013	5.14867	5.30354	5.07428	3.68387	3.87357	3.47283	3.25425	3.40878	3.23596	3.53934	3.56666	5.38338	5.18142	5.30541	5.25122
ORAI1	3.96898	4.20774	3.88612	4.11164	4.79991	4.14204	3.94332	3.98145	4.04316	3.72038	3.94722	4.30314	3.90595	3.88934	3.79149	3.87675	4.11776	4.1264	3.4849	4.17365	3.45612	3.5741	3.31441	3.36632
ORAI3	5.05714	4.80909	4.85004	4.92566	5.13026	5.26462	5.24288	5.02394	5.00855	5.07209	4.97037	4.87004	4.90511	4.92303	4.86857	4.69258	5.05205	5.06457	5.09282	4.92431	5.2601	5.13702	5.35125	5.05724
PIEZO1	6.08173	5.98322	6.00708	5.60369	4.94381	5.44713	5.6126	5.00438	7.46173	7.69966	7.52877	7.31151	5.91534	6.43955	6.34111	5.67492	5.81054	6.25508	6.12898	5.83699	7.31408	7.64855	7.26568	7.47574
PIEZO2	4.05754	4.25384	3.84817	4.11639	1.38293	2.17128	2.28825	2.37322	1.03799	1.12121	0.887898	1.4494	4.84029	5.08927	4.63773	5.31214	4.08733	4.3018	4.24524	4.2531	1.4362	1.52064	2.36837	2.29885
