# Supplementary material for: Biomechanical Isolation is Required for Maintenance of the Cardiac Pacemaker Cell Fate
Source: Research Square preprint supplement (doi:10.21203/rs.3.rs-9520289/v1), 2026-05-04
Supplement: Supplementary file 4 [file c2268a7848a111f10611fb12.xlsx]

## Sheet: Proteins_ALL
ProteinGroups	ProteinNames	Genes	ProteinDescriptions	FastaFiles	# Total Unique Peptides	CellularComponent	BiologicalProcess	MolecularFunction	Log2FC: SAN / Ventricle	Log2FC: SAN / Atria	Log2FC: Ventricle / Atria	p-value: SAN / Ventricle	p-value: SAN / Atria	p-value: Ventricle / Atria	q-value: SAN / Ventricle	q-value: SAN / Atria	q-value: Ventricle / Atria	Atria_1	Atria_2	Atria_3	Atria_4	Atria_5	Ventricle_1	Ventricle_2	Ventricle_3	Ventricle_4	Ventricle_5	SAN_1	SAN_2	SAN_3	SAN_4	SAN_5	Pool_R1	Pool_R2	Summed Quantity	Atria_1	Atria_2	Atria_3	Atria_4	Atria_5	Ventricle_1	Ventricle_2	Ventricle_3	Ventricle_4	Ventricle_5	SAN_1	SAN_2	SAN_3	SAN_4
P00761	SWISS-PROT:P00761|TRYP_PIG		Trypsin - Sus scrofa (Pig).	contaminants_mq1,6_headersForSpectronaut	12				1.6416	1.0467	-0.5949	2.859e-07	3.322e-06	0.00586815	0.000275972	0.000708351	0.0211756	24.83	24.52	25.09	25.06	24.89	24.44	24.47	24.12	23.78	24.55	26	25.94	25.88	26.06	25.8	24.92	25.12	648876248	29773242	24068426	35825916	34893712	31175182	22810442	23169310	18278972	14362456	24491066	67172568	64502512	61544224	70072992
P60706	ACTB_CHICK	ACTB	Actin, cytoplasmic 1	Uniprot_Gallus-gallus(chicken)_Rev+Unrev51565sequences_Jan2024	36	nucleus,cytoplasm,cytosol,cytoskeleton,plasma membrane,focal adhesion,actin cytoskeleton,lamellipodium,cortical cytoskeleton,NuA4 histone acetyltransferase complex,cytoplasmic ribonucleoprotein granule,myelin sheath,dense body	negative regulation of protein binding,cell motility,cellular response to cytochalasin B,postsynaptic actin cytoskeleton organization	protein binding,ATP binding,kinesin binding,protein kinase binding,Tat protein binding,identical protein binding,nitric-oxide synthase binding,structural constituent of postsynaptic actin cytoskeleton	0.3679	0.0914	-0.2765	0.0791326	0.68076	0.200693	0.0973741	0.370323	0.177423	24.49	23.87	23.66	24.52	24.35	23.87	23.87	23.94	23.98	24.03	24.43	24.34	24.5	24.48	23.63	24.04	24.07	316905167	23516284	15283515	13210966	24073412	21454274	15283304	15346367	16110618	16595586	17189018	22554688	21306510	23669724	23444694
P08287	H11L_CHICK		Histone H1.11L	Uniprot_Gallus-gallus(chicken)_Rev+Unrev51565sequences_Jan2024	23	nucleosome,nucleus	nucleosome assembly	DNA binding	1.4079	1.0547	-0.3533	0.0312722	0.0538058	0.0021237	0.0545622	0.0765404	0.0129094	23.14	22.99	23.26	23.06	23	22.91	22.83	22.73	22.6	22.61	23.9	23.79	23.74	23.93	24.97	23.15	23.31	192521742	9239499	8321455	10063706	8746155	8403620	7891938	7.43141e+06	6944572	6365786	6415806	15663702	14538096	13991916	15993010
P00356	G3P_CHICK	GAPDH	Glyceraldehyde-3-phosphate dehydrogenase	Uniprot_Gallus-gallus(chicken)_Rev+Unrev51565sequences_Jan2024	44	nucleus,cytoplasm,lipid particle,cytosol,plasma membrane,microtubule cytoskeleton,membrane,intracellular ribonucleoprotein complex,nuclear membrane,GAIT complex	microtubule cytoskeleton organization,nuclear membrane fusion,gluconeogenesis,glycolytic process,negative regulation of endopeptidase activity,negative regulation of translation,peptidyl-cysteine S-trans-nitrosylation,negative regulation of apoptotic process,positive regulation of cytokine secretion,protein stabilization,defense response to fungus,neuron apoptotic process,killing by host of symbi…	glyceraldehyde-3-phosphate dehydrogenase (NAD+) (phosphorylating) activity,microtubule binding,aspartic-type endopeptidase inhibitor activity,peptidyl-cysteine S-nitrosylase activity,identical protein binding,NADP binding,NAD binding,disordered domain specific binding	-0.4611	0.246	0.7071	0.625769	0.836543	0.00695367	0.351686	0.421804	0.0231858	22.37	22.54	22.93	21.97	22.73	23.38	22.68	23.38	23.37	23.33	21.32	20.98	21.03	20.67	24.73	22.68	22.73	130401045	5415788	6100611	8.00477e+06	4.09655e+06	6956654	10929714	6698503	10895731	10819199	10570545	2.61151e+06	2.06455e+06	2.14222e+06	1.66925e+06
D0EKR3	D0EKR3_CHICK		Peptidyl-prolyl cis-trans isomerase	Uniprot_Gallus-gallus(chicken)_Rev+Unrev51565sequences_Jan2024	28	cell	protein peptidyl-prolyl isomerization,protein folding	peptidyl-prolyl cis-trans isomerase activity	0.7066	1.6848	0.9782	0.6608	0.446582	0.00665512	0.363578	0.289026	0.0226848	21.44	21.95	22.1	21.15	21.87	22.72	22.23	22.62	22.7	23.19	21.36	20.6	20.87	21	25.52	22.34	22.34	119259125	2.8463e+06	4.04818e+06	4506514	2320864	3.84421e+06	6920037	4.91572e+06	6423903	6803168	9543360	2.69932e+06	1586247	1.91361e+06	2.09324e+06
P68034	ACTC_CHICK	ACTC1	Actin, alpha cardiac muscle 1	Uniprot_Gallus-gallus(chicken)_Rev+Unrev51565sequences_Jan2024	19	I band,actomyosin, actin portion	skeletal muscle thin filament assembly,actin-myosin filament sliding,negative regulation of apoptotic process,cardiac myofibril assembly,cardiac muscle tissue morphogenesis,heart contraction	ATP binding,ATPase activity,myosin binding	-0.4785	-0.82	-0.3415	0.0135799	0.0264167	0.185953	0.0331266	0.0491916	0.169033	23.15	22.55	22.18	23.29	23.07	22.49	22.56	22.46	22.65	22.64	21.88	22.22	22.3	22.35	21.52	22.58	22.52	104772050	9295716	6146811	4.7497e+06	10287766	8779327	5.89627e+06	6167947	5.77152e+06	6596471	6552451	3.84932e+06	4.87604e+06	5.16064e+06	5.34576e+06
A0A8V0XBW1;Q5ZKM2;Q90835	A0A8V0XBW1_CHICK;Q5ZKM2_CHICK;EF1A_CHICK	EEF1A1;RCJMB04_10b5;EEF1A	Elongation factor 1-alpha;Elongation factor 1-alpha;Elongation factor 1-alpha 1	Uniprot_Gallus-gallus(chicken)_Rev+Unrev51565sequences_Jan2024	40	;;intracellular,cytoplasm	;;translational elongation,translation	;;translation elongation factor activity,GTPase activity,GTP binding	-1.2555	-0.6486	0.6069	0.000125298	0.0164313	0.000975232	0.00340266	0.0370121	0.00867421	22.26	22.49	22.61	22.38	22.45	23.15	22.75	23.12	23.18	23.01	22.16	21.91	22	21.89	20.52	22.41	22.43	101362800	5.01318e+06	5.89272e+06	6.41753e+06	5472180	5.72162e+06	9299207	7057958	9137282	9489017	8449113	4.68177e+06	3.94527e+06	4.18974e+06	3875902
P15636	SWISS-PROT:P15636		Protease I precursor Lysyl endopeptidase Achromobacter lyticus.	contaminants_mq1,6_headersForSpectronaut	22				1.4732	0.9648	-0.5084	0.00140737	0.00395802	0.053163	0.0104195	0.0175389	0.0758939	21.69	21.64	22.3	22.41	22.2	21.83	21.75	21.43	20.93	21.75	23.25	22.99	22.98	23.37	22.51	21.87	22.18	89701875	3.37909e+06	3.2696e+06	5149339	5562004	4.82684e+06	3.71941e+06	3520024	2.82934e+06	1990937	3.53762e+06	9950537	8.30824e+06	8279431	10808699
P04268	TPM1_CHICK	TPM1	Tropomyosin alpha-1 chain	Uniprot_Gallus-gallus(chicken)_Rev+Unrev51565sequences_Jan2024	42	muscle thin filament tropomyosin,actin filament,plasma membrane,actin cytoskeleton	actin filament organization,cardiac muscle contraction,muscle contraction	protein binding,cytoskeletal protein binding,structural constituent of muscle,identical protein binding,protein homodimerization activity,protein heterodimerization activity,actin filament binding	1.5306	1.1385	-0.3921	0.122878	0.179345	0.182143	0.129204	0.165043	0.166703	22.16	21.49	21.63	22.25	22.03	21.13	21.89	21.09	21.1	22.16	22.53	22.49	22.25	22.69	24.3	21.97	22.11	88532483	4684624	2.94706e+06	3.24949e+06	4.99793e+06	4276861	2.29022e+06	3.89489e+06	2232923	2.2449e+06	4696377	6044257	5.88154e+06	4.97311e+06	6.75791e+06
P00337	LDHB_CHICK	LDHB	L-lactate dehydrogenase B chain	Uniprot_Gallus-gallus(chicken)_Rev+Unrev51565sequences_Jan2024	33	cytosol	carbohydrate metabolic process,pyruvate metabolic process,oxidation-reduction process	L-lactate dehydrogenase activity	-0.4842	0.4448	0.9289	0.584328	0.709351	0.00656496	0.33753	0.37993	0.0225016	21.81	21.95	22.1	21.32	21.85	22.69	22.1	23.03	22.97	22.83	20.92	20.59	20.61	20.72	24.14	22.05	22.15	88466383	3.66548e+06	4.06067e+06	4.509e+06	2618502	3.77983e+06	6755448	4.48904e+06	8586766	8210029	7434249	1.98673e+06	1.5797e+06	1.60108e+06	1.72211e+06
Q7SX63	Q7SX63_CHICK	HSP70	Heat shock protein 70	Uniprot_Gallus-gallus(chicken)_Rev+Unrev51565sequences_Jan2024	53	ubiquitin ligase complex,synaptonemal complex,Prp19 complex,male germ cell nucleus,extracellular space,cell,nucleus,mitochondrion,cytosol,focal adhesion,cell surface,membrane,intracellular ribonucleoprotein complex,CatSper complex,perikaryon,myelin sheath,receptor complex,extracellular exosome,blood microparticle,meiotic spindle,plasma membrane,cytoplasm	positive regulation of protein phosphorylation,male meiosis I,spermatid development,response to heat,response to cold,response to organonitrogen compound,response to organic cyclic compound,regulation of protein stability,response to progesterone,protein refolding,negative regulation of transcription, DNA-templated,ATP metabolic process,synaptonemal complex disassembly,negative regulation of incl…	G-protein coupled receptor binding,RNA binding,ATP binding,ATPase activity,enzyme binding,MHC class II protein complex binding,heat shock protein binding,ubiquitin protein ligase binding,progesterone receptor binding,unfolded protein binding,glycolipid binding,C3HC4-type RING finger domain binding,disordered domain specific binding,ATPase activity, coupled,protein binding involved in protein fold…	1.0938	0.913	-0.1808	0.100028	0.133242	0.0598397	0.113354	0.136193	0.0816828	21.85	21.92	22.14	21.76	21.93	21.85	21.69	21.71	21.75	21.71	22.61	22.27	22.44	22.38	23.83	22.09	22.05	83757910	3.7695e+06	3965563	4.63153e+06	3.54041e+06	4.00059e+06	3.78496e+06	3.37437e+06	3.43714e+06	3531685	3434726	6391531	5.05109e+06	5.67437e+06	5444151
Q5ZME1	Q5ZME1_CHICK	HNRNPA2B1	Heteroous nuclear ribonucleoprotein A2/B1	Uniprot_Gallus-gallus(chicken)_Rev+Unrev51565sequences_Jan2024	45	nucleoplasm,cytoplasm,extracellular exosome,catalytic step 2 spliceosome	negative regulation of transcription from RNA polymerase II promoter,mRNA splicing, via spliceosome,mRNA export from nucleus,primary miRNA processing,negative regulation of mRNA splicing, via spliceosome,miRNA transport	mRNA 3'-UTR binding,miRNA binding,single-stranded telomeric DNA binding,pre-mRNA intronic binding,N6-methyladenosine-containing RNA binding	0.7582	0.4894	-0.2687	0.0220653	0.0646101	0.00311095	0.0440838	0.0857663	0.0155306	22.08	21.95	22.1	22.21	22.12	21.92	21.96	21.74	21.71	21.79	22.44	22.39	22.39	22.43	23.13	22.05	22.06	81142502	4.42498e+06	4054390	4.49454e+06	4.85678e+06	4564872	3978313	4.06826e+06	3.49265e+06	3.43432e+06	3615659	5679678	5483443	5485746	5.63353e+06
A0A8V0Z2M5;A0A8V0Z8H5;A0A8V0ZFY3;Q5ZJA3	A0A8V0Z2M5_CHICK;A0A8V0Z8H5_CHICK;A0A8V0ZFY3_CHICK;CDR2_CHICK	CDR2	Cerebellar deration related protein 2;Cerebellar deration related protein 2;Cerebellar deration related protein 2;Cerebellar degeneration-related protein 2	Uniprot_Gallus-gallus(chicken)_Rev+Unrev51565sequences_Jan2024	2	;;;cytoplasm	;;;	;;;	-0.6206	-1.5509	-0.9303	0.187708	0.0841292	0.183427	0.169982	0.10133	0.167523	23.63	22.93	22.45	18.83	22.9	21.1	21.42	21.13	22.54	22.24	20.43	21.39	21.21	21.5	NA	22.36	21.86	72181870	12989609	7998385	5727824	467220	7.85278e+06	2.2449e+06	2.80311e+06	2.28814e+06	6082604	4965771	1.41473e+06	2.74783e+06	2430219	2.97321e+06
A0A8V1AIH7	A0A8V1AIH7_CHICK	TPM4	Tropomyosin alpha-4 chain	Uniprot_Gallus-gallus(chicken)_Rev+Unrev51565sequences_Jan2024	14				1.0064	0.5672	-0.4392	0.191666	0.369336	0.144343	0.172332	0.259199	0.143208	22.08	21.41	21.52	22.24	21.91	21.07	21.76	20.93	21	22.03	21.93	21.92	21.72	21.95	23.62	21.7	21.68	68371894	4.44594e+06	2.78374e+06	3013526	4961386	3.93175e+06	2.19811e+06	3.55778e+06	1.99303e+06	2.09079e+06	4.27378e+06	4007435	3.97523e+06	3455203	4.06426e+06
A0A8V1A3F1	A0A8V1A3F1_CHICK	LOC100859737	Tubulin alpha chain	Uniprot_Gallus-gallus(chicken)_Rev+Unrev51565sequences_Jan2024	39				-2.5053	-0.5381	1.9672	0.00787588	0.00382983	0.0110403	0.0246473	0.0172471	0.0295057	21.06	20.97	20.67	21.05	21.23	22.44	22.5	22.75	23.18	23.64	20.33	20.28	20.59	20.54	20.59	21.82	21.78	66382381	2.18761e+06	2.06101e+06	1.66931e+06	2.1778e+06	2.45554e+06	5.68014e+06	5.94771e+06	7.04495e+06	9511351	13072227	1.31865e+06	1.26947e+06	1.57914e+06	1.52577e+06
P02610	MLRA_CHICK		Myosin regulatory light chain 2A, cardiac muscle isoform	Uniprot_Gallus-gallus(chicken)_Rev+Unrev51565sequences_Jan2024	23	myosin complex		calcium ion binding	1.1538	-0.1515	-1.3053	0.0927746	0.712762	0.0192465	0.107784	0.381202	0.0407053	22.32	21.45	21.46	22.47	22.44	20.06	20.16	19.88	20.61	22.03	21.45	21.37	21.74	21.66	22.9	21.58	21.59	58139870	5239733	2859510	2.88002e+06	5.81205e+06	5.69709e+06	1.09327e+06	1.17319e+06	965473	1.59622e+06	4.27158e+06	2.86964e+06	2.71449e+06	3.50181e+06	3.32228e+06
A0A8V0XM21	A0A8V0XM21_CHICK	HBBA	Hemoglobin subunit epsilon 1	Uniprot_Gallus-gallus(chicken)_Rev+Unrev51565sequences_Jan2024	17				-1.268	1.6714	2.9394	0.0582697	0.26834	0.00164695	0.0802689	0.212737	0.0112784	19.26	19.69	20.33	19.01	19.52	22.81	21.8	22.65	22.92	22.43	20.62	20.1	19.82	20.19	22.95	21.56	21.66	54643780	629516	845903	1.31712e+06	526541	750267	7.37743e+06	3.64919e+06	6581637	7949586	5657288	1.61115e+06	1.12185e+06	926227	1.19973e+06
A0A1D5PY49	A0A1D5PY49_CHICK	LOC426037	Histone H2B	Uniprot_Gallus-gallus(chicken)_Rev+Unrev51565sequences_Jan2024	2	nucleosome,nucleus		DNA binding,protein heterodimerization activity	1.1301	1.4462	0.3162	0.0129215	0.00131541	0.550331	0.0321158	0.0100695	0.325694	20.87	20.75	20.96	21.04	20.81	20.84	20.49	20.41	20.98	22.34	22.04	22.65	22.28	22.1	22.51	21.22	21.22	53173585	1.92125e+06	1.75979e+06	2.03667e+06	2.16124e+06	1.83929e+06	1.87561e+06	1.47263e+06	1.3905e+06	2068883	5291634	4.32285e+06	6.59016e+06	5090645	4484411
A0A1D5PUL6;A0A8V0Z557;P11501	A0A1D5PUL6_CHICK;A0A8V0Z557_CHICK;HS90A_CHICK	HSP90AA1	Heat shock protein HSP 90-alpha	Uniprot_Gallus-gallus(chicken)_Rev+Unrev51565sequences_Jan2024	66	cytosol;;cell,nucleus,cytoplasm,cytosol,plasma membrane,cell surface,axon,melanosome,perikaryon,receptor complex	protein folding,response to stress;;protein folding,positive regulation of cell proliferation,response to heat,response to cold,response to organonitrogen compound,response to organic cyclic compound,response to progesterone,positive regulation of nitric oxide biosynthetic process,response to antibiotic,regulation of catalytic activity,protein stabilization,positive regulation of cell cycle G2/M …	ATP binding,heat shock protein binding,unfolded protein binding,phosphoprotein binding;;ATP binding,protein C-terminus binding,ATPase activity,nitric-oxide synthase regulator activity,estrogen receptor binding,TPR domain binding,heat shock protein binding,progesterone receptor binding,protein homodimerization activity,virion binding,unfolded protein binding,chaperone binding,phosphoprotein bindin…	-0.8974	-0.5742	0.3231	0.00400799	0.0163479	0.088447	0.0176176	0.0368897	0.104623	21.53	21.67	21.74	21.4	21.73	22.22	21.63	22.01	22.16	21.58	21.33	21.09	21.27	21.17	20.02	21.48	21.5	52992559	3.03228e+06	3.33385e+06	3.50029e+06	2.77623e+06	3469235	4877007	3.25131e+06	4.21516e+06	4.68294e+06	3130353	2.64165e+06	2.23087e+06	2.5263e+06	2360939
O73885	HSP7C_CHICK	HSPA8	Heat shock cognate 71 kDa protein	Uniprot_Gallus-gallus(chicken)_Rev+Unrev51565sequences_Jan2024	35	nucleus,cytoplasm,intracellular ribonucleoprotein complex,vesicle,terminal bouton,cytosol,dendrite,axon,postsynaptic cytosol,lysosome,autophagosome,plasma membrane,presynaptic cytosol	gastrulation,embryo development ending in birth or egg hatching,embryonic organ development,response to unfolded protein,cellular response to heat,late endosomal microautophagy,axo-dendritic transport,protein targeting to lysosome involved in chaperone-mediated autophagy,cellular response to unfolded protein,protein refolding,chaperone-mediated protein transport involved in chaperone-mediated aut…	protein binding,ATP binding,phosphoprotein binding,misfolded protein binding,ATPase activity, coupled,protein binding involved in protein folding,clathrin-uncoating ATPase activity,unfolded protein binding,ATPase activity,heat shock protein binding	0.8398	0.834	-0.0058	0.247043	0.249357	0.942331	0.201779	0.203018	0.454031	21.07	21.17	21.36	21.17	21.42	21.36	21.18	21.28	21.23	21.14	21.62	21.43	21.52	21.48	23.28	21.19	21.38	52104719	2.19656e+06	2365471	2.70053e+06	2359186	2.8087e+06	2.68306e+06	2.37427e+06	2.55394e+06	2456908	2312427	3218543	2.82236e+06	2998727	2.9199e+06
P09860	TNNC1_CHICK	TNNC1	Troponin C, slow skeletal and cardiac muscles	Uniprot_Gallus-gallus(chicken)_Rev+Unrev51565sequences_Jan2024	11	troponin complex,cardiac Troponin complex	skeletal muscle contraction,regulation of muscle contraction,transition between fast and slow fiber,regulation of muscle filament sliding speed,regulation of ATPase activity,ventricular cardiac muscle tissue morphogenesis,cardiac muscle contraction	calcium ion binding,troponin I binding,troponin T binding,protein homodimerization activity,calcium-dependent protein binding,actin filament binding	0.4887	0.1035	-0.3852	0.314131	0.791767	0.0907593	0.2349	0.407737	0.10629	21.73	21.33	21.56	21.87	21.64	20.91	21.77	21.05	20.81	21.48	21.59	21.36	21.39	21.02	22.7	21.34	21.32	51627774	3488568	2.62879e+06	3091001	3834726	3278083	1.97606e+06	3588172	2.17539e+06	1837158	2.91954e+06	3.16659e+06	2.68266e+06	2750520	2.12495e+06
A0A8V1AML2	A0A8V1AML2_CHICK	MYH1F	Myosin heavy chain, skeletal muscle, adult	Uniprot_Gallus-gallus(chicken)_Rev+Unrev51565sequences_Jan2024	198				4.1828	-1.2065	-5.3893	0.000256493	0.0350944	0.00595583	0.00473028	0.0584356	0.0212791	22.82	22.11	21.34	23.06	22.92	16.85	16.52	16.79	17.23	18.02	21.09	21.4	21.59	21.61	21.05	21.38	21.43	51066866	7387981	4525374	2652682	8720877	7946354	117764	94242.9	113250	154150	265798	2.2305e+06	2.76674e+06	3.15323e+06	3.20553e+06
Q00649	HSPB1_CHICK	HSPB1	Heat shock protein beta-1	Uniprot_Gallus-gallus(chicken)_Rev+Unrev51565sequences_Jan2024	23	intracellular,nucleus,cytoplasm,mitochondrion,spindle,plasma membrane,Z disc,contractile fiber	negative regulation of protein kinase activity,response to heat,negative regulation of actin filament polymerization,positive regulation of interleukin-1 beta production,positive regulation of tumor necrosis factor biosynthetic process,regulation of I-kappaB kinase/NF-kappaB signaling,barbed-end actin filament capping,chaperone-mediated protein folding,negative regulation of protein serine/threon…	protein kinase C binding,protein kinase C inhibitor activity,identical protein binding,protein homodimerization activity,protein binding involved in protein folding	-1.1449	-0.6798	0.4651	0.0439724	0.0161659	0.228656	0.0672856	0.0366577	0.192389	21.38	21.47	21.83	20.94	21.43	21.62	21.53	21.64	21.62	22.71	20.9	20.7	20.78	20.71	20.69	21.27	21.24	47661784	2729296	2.91308e+06	3.72289e+06	2.01123e+06	2.81834e+06	3215706	3.02431e+06	3265924	3.21274e+06	6876655	1.95767e+06	1.69758e+06	1.80204e+06	1709424
F1NQG5	F1NQG5_CHICK	RPL15	Ribosomal protein L15	Uniprot_Gallus-gallus(chicken)_Rev+Unrev51565sequences_Jan2024	22	nucleus,ribosome	translation	structural constituent of ribosome,cadherin binding	0.5226	0.1556	-0.367	0.000893686	0.198531	0.0195423	0.00832643	0.176203	0.0411087	21.44	21.39	21.12	21.68	21.58	21.07	21.01	21.01	21.03	21.3	21.42	21.57	21.54	21.72	21.78	21.13	21.22	46258504	2850447	2.75424e+06	2.28477e+06	3.35508e+06	3.12926e+06	2.19382e+06	2.11608e+06	2.11829e+06	2.14344e+06	2.57357e+06	2.80294e+06	3.10361e+06	3.04157e+06	3.4568e+06
A0A8V0ZWP4;A0A8V0ZWR1	A0A8V0ZWP4_CHICK;A0A8V0ZWR1_CHICK	NACA	Nascent polypeptide-associated complex alpha subunit	Uniprot_Gallus-gallus(chicken)_Rev+Unrev51565sequences_Jan2024	55	;	;	;	-0.143	0.1558	0.2988	0.854662	0.855822	0.0772306	0.427657	0.427911	0.0957787	21.04	21.22	21.26	21.14	21.31	21.21	21.53	21.36	21.44	21.86	20.36	20.14	20.31	20.27	22.99	20.84	21.24	44555576	2.1543e+06	2.43737e+06	2.51577e+06	2.31205e+06	2.60082e+06	2.42101e+06	3.02218e+06	2.69003e+06	2.84228e+06	3810665	1341575	1.15199e+06	1.30099e+06	1.26528e+06
A0A8V0YEW2;A0A8V0YH12;A0A8V0YH91;A0A8V0YLZ9;P02263;Q92069	A0A8V0YEW2_CHICK;A0A8V0YH12_CHICK;A0A8V0YH91_CHICK;A0A8V0YLZ9_CHICK;H2A4_CHICK;Q92069_CHICK	H2AFJ;H2AFJ;;;;H2A-VIII	Histone H2A;Histone H2A;Histone H2A;Histone H2A;Histone H2A-IV;Histone H2A	Uniprot_Gallus-gallus(chicken)_Rev+Unrev51565sequences_Jan2024	9	;;;;nucleosome,nuclear chromatin;	;;;;chromatin silencing,chromatin organization;	;;;;DNA binding,protein heterodimerization activity;	1.2139	1.3546	0.1407	0.0100257	0.00100862	0.785733	0.0281114	0.00880899	0.405726	20.93	20.41	20.61	20.77	20.82	20.37	20.42	20.02	20.42	22.03	21.84	22.03	21.94	22	22.46	20.95	21.07	44452155	1999472	1.39551e+06	1.60077e+06	1.78243e+06	1.85142e+06	1354147	1.39834e+06	1064580	1.40045e+06	4.2963e+06	3.75783e+06	4290822	4.0355e+06	4198196
A0A8V1A935	A0A8V1A935_CHICK	TPM3	Tropomyosin 3	Uniprot_Gallus-gallus(chicken)_Rev+Unrev51565sequences_Jan2024	16				2.188	2.2846	0.0966	0.0596687	0.0571669	0.719703	0.0815358	0.0793194	0.383307	20.16	19.74	20.2	20.28	20.28	19.97	20.37	19.87	19.76	20.91	22.12	21.88	21.58	22.05	23.56	20.87	20.98	44190194	1.17383e+06	878049	1.20109e+06	1270567	1.2698e+06	1.02999e+06	1.3555e+06	957297	886810	1.96475e+06	4542931	3863975	3.13142e+06	4328899
A0A8V0ZG91;A0A8V0ZG96	A0A8V0ZG91_CHICK;A0A8V0ZG96_CHICK	PKLR	Pyruvate kinase	Uniprot_Gallus-gallus(chicken)_Rev+Unrev51565sequences_Jan2024	64	;	;	;	0.2212	0.6284	0.4072	0.825734	0.59028	0.0188451	0.418542	0.339411	0.0401539	20.82	21.07	21.15	20.59	21.09	21.53	21.04	21.44	21.53	21.22	20.45	19.97	20.34	20.23	23.36	21	21.03	43679010	1.84736e+06	2203093	2323741	1.57867e+06	2.2345e+06	3.02544e+06	2152716	2.85417e+06	3.03474e+06	2.44234e+06	1.42748e+06	1.0244e+06	1.32441e+06	1.22927e+06
P62801;P70081	H4_CHICK;H48_CHICK	H4-I;H4-VIII	Histone H4;Histone H4 type VIII	Uniprot_Gallus-gallus(chicken)_Rev+Unrev51565sequences_Jan2024	19	nuclear nucleosome,nucleoplasm;nuclear nucleosome	nucleosome assembly,DNA-templated transcription, initiation;nucleosome assembly,DNA-templated transcription, initiation	DNA binding,histone binding,protein heterodimerization activity;DNA binding,histone binding,protein heterodimerization activity	0.9459	1.3797	0.4338	0.085362	8.476e-07	0.561201	0.102262	0.000424535	0.329476	20.82	20.34	20.4	20.77	20.58	20.35	20.26	19.93	20.5	22.42	21.82	22.11	21.95	21.94	22.03	21.07	21.05	43520122	1.84611e+06	1.32409e+06	1.38103e+06	1.7891e+06	1.56554e+06	1.33862e+06	1.25431e+06	997178	1.47831e+06	5.61042e+06	3.69934e+06	4.51993e+06	4.051e+06	4.0276e+06
F1P5V6	F1P5V6_CHICK	MYL3	Myosin, light chain 3, alkali; ventricular, skeletal, slow	Uniprot_Gallus-gallus(chicken)_Rev+Unrev51565sequences_Jan2024	28				1.6211	0.7332	-0.8879	0.36153	0.57569	0.129458	0.255873	0.334639	0.133769	21.35	20.46	20.59	21.8	21.49	19.37	19.79	19.29	19.99	21.68	19.94	20	20.44	21.13	23.8	20.89	21.07	43452769	2.66404e+06	1.44092e+06	1.58054e+06	3.64632e+06	2.93914e+06	676578	904054	641226	1.03966e+06	3.36987e+06	1.00773e+06	1.04626e+06	1.41871e+06	2.2897e+06
A0A1D5PXH1	A0A1D5PXH1_CHICK	HNRNPA3	Heterogeneous nuclear ribonucleoprotein A3	Uniprot_Gallus-gallus(chicken)_Rev+Unrev51565sequences_Jan2024	50				1.198	0.8654	-0.3326	0.0217289	0.043748	0.000687185	0.0436855	0.067103	0.00735826	21.05	20.92	21.06	21.07	20.95	20.8	20.8	20.58	20.56	20.63	21.69	21.69	21.47	21.69	22.57	21.15	21.01	42640391	2.17002e+06	1.98153e+06	2.18662e+06	2.20187e+06	2.0254e+06	1.82521e+06	1.83163e+06	1.56705e+06	1.54585e+06	1.62038e+06	3.38511e+06	3375987	2.9015e+06	3.37182e+06
F1NMY1	F1NMY1_CHICK	YWHAG	Tyrosine 3-monooxygenase/tryptophan 5-monooxygenase activation protein gamma	Uniprot_Gallus-gallus(chicken)_Rev+Unrev51565sequences_Jan2024	23	intracellular,myelin sheath	protein targeting,regulation of neuron differentiation,regulation of synaptic plasticity	protein kinase C binding,insulin-like growth factor receptor binding,protein domain specific binding,identical protein binding	0.0117	0.0714	0.0597	0.960537	0.780422	0.589932	0.459435	0.403913	0.339319	21.11	21.18	21.55	21.03	21.14	21.14	21.25	21.26	21.3	21.4	21.2	20.89	21.1	20.99	21.96	20.99	21.13	41958300	2262664	2.37922e+06	3.06753e+06	2.13514e+06	2.30421e+06	2.31812e+06	2.48579e+06	2.5134e+06	2.58225e+06	2762301	2.41533e+06	1.94367e+06	2.24684e+06	2.08954e+06
P09987	H1_CHICK		Histone H1	Uniprot_Gallus-gallus(chicken)_Rev+Unrev51565sequences_Jan2024	2	nucleosome,nucleus	nucleosome assembly	DNA binding	1.4575	0.9798	-0.4777	0.0726406	0.134501	0.0116571	0.0922039	0.136917	0.0304359	20.79	20.89	21.07	20.99	21.03	20.73	20.79	20.48	20.22	20.04	21.55	21.5	21.58	21.35	22.97	20.79	21.07	41596041	1808351	1.94268e+06	2.19939e+06	2.08502e+06	2.14724e+06	1.74274e+06	1.80807e+06	1.46451e+06	1.21991e+06	1.07723e+06	3.06441e+06	2.96555e+06	3.13535e+06	2681778
A0A8V1A1C7;A0A8V1A6D6;A0A8V1A8U7;A0A8V1A8V2;A0A8V1ABS1;A0A8V1ADU2;E1C670;P02642	A0A8V1A1C7_CHICK;A0A8V1A6D6_CHICK;A0A8V1A8U7_CHICK;A0A8V1A8V2_CHICK;A0A8V1ABS1_CHICK;A0A8V1ADU2_CHICK;E1C670_CHICK;TNNT2_CHICK	TNNT2	Troponin T2, cardiac type;Troponin T2, cardiac type;Troponin T2, cardiac type;Troponin T2, cardiac type;Troponin T2, cardiac type;Troponin T2, cardiac type;Troponin T2, cardiac type;Troponin T, cardiac muscle isoforms	Uniprot_Gallus-gallus(chicken)_Rev+Unrev51565sequences_Jan2024	28	;;;;;;troponin complex;troponin complex	;;;;;;regulation of muscle contraction;regulation of muscle contraction,cardiac muscle contraction,muscle contraction,sarcomere organization,skeletal muscle contraction	;;;;;;;calcium ion binding,protein binding,troponin I binding,calcium-dependent ATPase activity,troponin C binding,tropomyosin binding	0.6039	0.3104	-0.2935	0.384708	0.605113	0.248127	0.265212	0.344408	0.202417	21.48	20.86	21.15	21.35	21.2	20.64	21.2	20.59	20.36	21.52	20.93	20.95	20.79	21.04	22.78	21.04	20.92	41507504	2930560	1.90109e+06	2.32791e+06	2.66593e+06	2.40113e+06	1.63803e+06	2.40633e+06	1.58204e+06	1.34643e+06	3.00329e+06	1.99948e+06	2.02028e+06	1.81136e+06	2.15307e+06
A0A8V0ZF10	A0A8V0ZF10_CHICK	QARS	glutamine--tRNA ligase	Uniprot_Gallus-gallus(chicken)_Rev+Unrev51565sequences_Jan2024	64				0.0722	-0.1343	-0.2064	0.731372	0.465885	0.0953312	0.387282	0.296232	0.109792	21.4	21.35	21.17	21.39	21.37	21.25	21.03	21.3	21.28	20.73	21.25	21.44	21.38	21.37	20.3	21.01	21.09	41177238	2.75839e+06	2679348	2.35541e+06	2.7541e+06	2709747	2.48635e+06	2.14647e+06	2.57602e+06	2.54477e+06	1.73581e+06	2.50141e+06	2.84232e+06	2.72653e+06	2.71761e+06
P00940	TPIS_CHICK	TPI1	Triosephosphate isomerase	Uniprot_Gallus-gallus(chicken)_Rev+Unrev51565sequences_Jan2024	34	cytosol	gluconeogenesis,glycolytic process,pentose-phosphate shunt,glycerol catabolic process,glyceraldehyde-3-phosphate biosynthetic process	triose-phosphate isomerase activity	0.4261	1.8472	1.4211	0.765456	0.416657	0.00346476	0.398784	0.277761	0.0164416	19.63	20.02	20.46	19.28	20.14	21.12	20.8	21.43	21.54	21.81	19.92	19.3	19.24	19.46	23.88	20.68	20.94	40840364	811419	1.06444e+06	1.44076e+06	636980	1.15162e+06	2.28438e+06	1.82525e+06	2828079	3.04668e+06	3686656	992603	647642	619639	720421
A0A8V0YRG0;A0A8V0YY29;A0A8V0YY39;Q90602	A0A8V0YRG0_CHICK;A0A8V0YY29_CHICK;A0A8V0YY39_CHICK;Q90602_CHICK	HNRNPAB;HNRNPAB;HNRNPAB;	Heteroous nuclear ribonucleoprotein A/B;Heteroous nuclear ribonucleoprotein A/B;Heteroous nuclear ribonucleoprotein A/B;Single stranded D box binding factor	Uniprot_Gallus-gallus(chicken)_Rev+Unrev51565sequences_Jan2024	27	;;;nucleoplasm,intracellular ribonucleoprotein complex	;;;	;;;RNA binding	0.7493	1.1073	0.358	0.360533	0.242294	0.0719765	0.255548	0.199108	0.0916971	20.61	20.61	20.82	20.6	20.67	21.05	21	20.73	20.8	21.44	21.19	21.01	20.92	21.1	23.13	20.89	20.91	40801105	1.59733e+06	1.60017e+06	1.85407e+06	1.59111e+06	1.67319e+06	2.16727e+06	2.09442e+06	1.73667e+06	1.82187e+06	2837654	2391874	2.11343e+06	1.98326e+06	2.24965e+06
P0C1H3;P0C1H4;Q9PSW9	H2B1_CHICK;H2B5_CHICK;H2B8_CHICK	H2B-I;H2B-V;H2B-VIII	Histone H2B 1/2/3/4/6;Histone H2B 5;Histone H2B 8	Uniprot_Gallus-gallus(chicken)_Rev+Unrev51565sequences_Jan2024	16	nucleosome,nucleus;nucleosome,nucleus;nucleosome,nucleus	nucleosome assembly,defense response to bacterium;nucleosome assembly;nucleosome assembly	DNA binding,protein heterodimerization activity;DNA binding,protein heterodimerization activity;DNA binding,protein heterodimerization activity	0.9395	1.3222	0.3827	0.0278507	5.56819e-05	0.453145	0.0506687	0.00235694	0.291431	20.57	20.44	20.42	20.67	20.44	20.61	20.43	20.12	20.5	21.97	21.68	21.97	21.98	21.77	21.73	20.83	21.07	39993826	1.55778e+06	1.42184e+06	1.40686e+06	1.67136e+06	1.41894e+06	1.60117e+06	1.41612e+06	1.13771e+06	1.48174e+06	4.11111e+06	3.36851e+06	4.11884e+06	4.12891e+06	3588446
P20111	ACTN2_CHICK	ACTN2	Alpha-actinin-2	Uniprot_Gallus-gallus(chicken)_Rev+Unrev51565sequences_Jan2024	66	plasma membrane,focal adhesion,Z disc,filopodium	muscle contraction,microspike assembly,regulation of membrane potential,sarcomere organization,focal adhesion assembly,protein homotetramerization,actin filament uncapping,cardiac muscle cell development,protein localization to plasma membrane,phospholipase C-activating angiotensin-activated signaling pathway,negative regulation of potassium ion transmembrane transporter activity,positive regulat…	calcium ion binding,protein binding,phosphatidylinositol-4,5-bisphosphate binding,LIM domain binding,thyroid hormone receptor coactivator activity,titin binding,protein homodimerization activity,ion channel binding,actin filament binding,FATZ binding,titin Z domain binding	-0.2169	-0.6436	-0.4267	0.474028	0.0458659	0.00151638	0.29918	0.0690651	0.0108248	21.58	21.35	21.42	21.48	21.48	21.07	21.31	21.02	20.85	20.91	20.93	21.16	21.17	21.05	18.63	21	20.98	38658735	3.13392e+06	2.68141e+06	2808114	2.91599e+06	2931001	2.1956e+06	2.59098e+06	2.11916e+06	1.88832e+06	1.9715e+06	1994444	2.33984e+06	2.35811e+06	2165464
P0CB50	PRDX1_CHICK	PRDX1	Peroxiredoxin-1	Uniprot_Gallus-gallus(chicken)_Rev+Unrev51565sequences_Jan2024	21	nucleus,mitochondrion,myelin sheath	cell proliferation,removal of superoxide radicals,natural killer cell activation,regulation of stress-activated MAPK cascade,erythrocyte homeostasis,natural killer cell mediated cytotoxicity,regulation of NF-kappaB import into nucleus,hydrogen peroxide catabolic process,cell redox homeostasis,oxidation-reduction process	protein binding,thioredoxin peroxidase activity,identical protein binding,cadherin binding	-0.5005	0.023	0.5235	0.199273	0.955644	0.014271	0.176618	0.458022	0.0340285	20.74	20.92	21.24	20.71	20.99	21.41	21.08	21.4	21.53	21.79	20.71	20.33	20.51	20.52	21.98	20.96	20.92	38641890	1.75364e+06	1989961	2.46981e+06	1.72071e+06	2.08959e+06	2.78897e+06	2.21664e+06	2.75833e+06	3.02285e+06	3621785	1719305	1.32054e+06	1.49766e+06	1.50025e+06
A0A8V0Y5D3;A0A8V0YDX4	A0A8V0Y5D3_CHICK;A0A8V0YDX4_CHICK	NPM1	Nucleophosmin	Uniprot_Gallus-gallus(chicken)_Rev+Unrev51565sequences_Jan2024	23	;	;	;	0.4545	0.8795	0.425	0.662168	0.470417	0.00337491	0.364009	0.297926	0.0162134	20.42	20.67	20.7	20.73	20.58	21.05	21.29	20.9	20.95	21.02	20.39	20.23	20.08	20.38	23.22	20.71	20.89	37448873	1.40139e+06	1.66891e+06	1.70268e+06	1.73675e+06	1.56677e+06	2.17778e+06	2.56105e+06	1953852	2.02137e+06	2.12924e+06	1.37877e+06	1.22765e+06	1109936	1.36279e+06
A0A8V0YTN4;P05122	A0A8V0YTN4_CHICK;KCRB_CHICK	CKB	creatine kinase;Creatine kinase B-type	Uniprot_Gallus-gallus(chicken)_Rev+Unrev51565sequences_Jan2024	34	;extracellular space,mitochondrion,cytosol,myelin sheath,extracellular membrane-bounded organelle	;ATP biosynthetic process,phosphorylation	;creatine kinase activity,ATP binding,ubiquitin protein ligase binding	0.3936	1.9964	1.6028	0.773758	0.388055	0.00068298	0.401763	0.266416	0.00733725	19.48	19.84	20.08	18.99	19.69	21.32	20.67	21.36	21.32	21.52	19.85	19.16	19.37	19.59	23.69	20.71	20.77	36839202	733702	938917	1.11059e+06	521503	847222	2.62174e+06	1667342	2.68682e+06	2625303	3009294	943255	586748	676298	789026
P32882	TBB2_CHICK		Tubulin beta-2 chain	Uniprot_Gallus-gallus(chicken)_Rev+Unrev51565sequences_Jan2024	31	cytoplasm,microtubule	cytoskeleton organization,microtubule-based process,negative regulation of microtubule polymerization,microtubule cytoskeleton organization,mitotic cell cycle,neuron migration	GTPase activity,structural constituent of cytoskeleton,calcium ion binding,GTP binding	-2.964	-0.4726	2.4913	0.00685704	0.0219936	0.00847484	0.0229997	0.0440067	0.0256627	19.71	19.7	19.48	19.77	20.06	21.93	21.79	21.97	22.21	22.98	19.03	18.97	19.61	19.08	19.59	20.96	20.98	36592645	855206	851828	729134	895809	1.092e+06	3.99293e+06	3634319	4.10529e+06	4858783	8.28421e+06	534455	511830	798043	554098
A0A8V1AEK5;Q45KQ2	A0A8V1AEK5_CHICK;Q45KQ2_CHICK	RBM3;	Cold-inducible RNA-binding protein	Uniprot_Gallus-gallus(chicken)_Rev+Unrev51565sequences_Jan2024	13	;	;	;	0.5594	0.9465	0.3871	0.427531	0.251745	0.129651	0.281824	0.204259	0.133837	20.59	20.42	20.7	20.65	20.13	20.49	21.09	20.67	20.66	21.4	21.11	20.71	20.54	20.86	22.74	20.96	20.84	35586582	1.57964e+06	1.40253e+06	1.69994e+06	1.65079e+06	1146604	1.47221e+06	2.22571e+06	1.67055e+06	1.65401e+06	2759200	2269892	1.72068e+06	1.52666e+06	1.90549e+06
P09244	TBB7_CHICK		Tubulin beta-7 chain	Uniprot_Gallus-gallus(chicken)_Rev+Unrev51565sequences_Jan2024	12	cytoplasm,microtubule	cytoskeleton organization,microtubule-based process,mitotic cell cycle,microtubule cytoskeleton organization	GTPase activity,structural constituent of cytoskeleton,GTP binding	-2.7742	-0.2591	2.5151	0.00635146	0.0705953	0.00717123	0.0221057	0.090641	0.0235236	19.66	19.52	19.49	19.77	19.93	21.78	21.82	21.98	22.19	22.9	19.34	19.3	19.72	19.2	19.5	20.76	20.9	35520164	829230	751025	737093	894839	996705	3591042	3.70175e+06	4.12896e+06	4791683	7.84563e+06	665108	647355	862587	600718
Q91956	Q91956_CHICK	YBX1	Y-box binding protein 1	Uniprot_Gallus-gallus(chicken)_Rev+Unrev51565sequences_Jan2024	29				0.6375	0.4874	-0.1501	0.380787	0.474589	0.171271	0.26377	0.299359	0.160326	20.92	20.89	20.5	20.95	20.89	20.69	20.84	20.56	20.54	20.79	20.55	20.73	20.56	20.85	22.62	20.9	20.8	34741902	1.98624e+06	1.94017e+06	1480005	2.03074e+06	1.93676e+06	1.6939e+06	1.87297e+06	1.54148e+06	1.52939e+06	1809927	1.53633e+06	1.73723e+06	1.54759e+06	1.8905e+06
A0A8V0YSS4;A0A8V0YT15;A0A8V0YT36;P15771	A0A8V0YSS4_CHICK;A0A8V0YT15_CHICK;A0A8V0YT36_CHICK;NUCL_CHICK	NCL	Nucleolin	Uniprot_Gallus-gallus(chicken)_Rev+Unrev51565sequences_Jan2024	49	;;;nucleolus	;;;	;;;DNA binding,RNA binding	0.7453	1.029	0.2837	0.321898	0.225214	0.0856386	0.238355	0.190582	0.102484	20.42	20.34	20.41	20.62	20.42	20.58	20.98	20.54	20.47	20.98	20.92	20.88	20.72	20.83	22.75	20.59	20.77	33751586	1.39967e+06	1.32759e+06	1397819	1.60821e+06	1.40199e+06	1.5633e+06	2.0651e+06	1.5262e+06	1.45726e+06	2.07409e+06	1.98832e+06	1.92335e+06	1.73257e+06	1.86272e+06
A0A8V0XXX0	A0A8V0XXX0_CHICK	RPS3A	Small ribosomal subunit protein eS1	Uniprot_Gallus-gallus(chicken)_Rev+Unrev51565sequences_Jan2024	27				0.095	-0.0734	-0.1683	0.378954	0.442578	0.0128728	0.263015	0.287474	0.0320699	20.94	20.99	20.97	21.02	21.06	20.86	20.83	20.77	20.7	20.97	21	21.04	21.06	20.91	20.55	20.79	20.76	33298424	2.01684e+06	2077443	2.05052e+06	2124847	2.19017e+06	1907524	1.86146e+06	1.7853e+06	1.70342e+06	2.05007e+06	2.09882e+06	2.15687e+06	2.18551e+06	1.96532e+06
E1C8Y9	E1C8Y9_CHICK	SRSF3	Serine and arginine rich splicing factor 3	Uniprot_Gallus-gallus(chicken)_Rev+Unrev51565sequences_Jan2024	16	nuclear speck	regulation of mRNA splicing, via spliceosome,cellular response to leukemia inhibitory factor	RNA binding,phospholipase binding	1.0427	0.8822	-0.1605	0.0116886	0.0200021	0.221507	0.030452	0.0416763	0.188869	20.49	20.47	20.66	20.72	20.61	20.41	20.69	20.25	20.09	20.64	21.34	21.33	21.19	21.28	22.05	20.73	20.7	32996737	1.47129e+06	1456932	1.65772e+06	1.72535e+06	1.59554e+06	1.39005e+06	1.68621e+06	1.24825e+06	1.11491e+06	1.63483e+06	2.65112e+06	2628283	2395965	2.55445e+06
P01994	HBA_CHICK	HBAA	Hemoglobin subunit alpha-A	Uniprot_Gallus-gallus(chicken)_Rev+Unrev51565sequences_Jan2024	15	extracellular space,hemoglobin complex	oxygen transport	oxygen transporter activity,iron ion binding,oxygen binding,heme binding	-1.0932	1.7381	2.8312	0.153824	0.331518	0.00116365	0.149499	0.242571	0.00947099	18.07	18.88	19.82	18.16	18.98	21.97	20.91	21.82	22.03	21.79	19.71	19.11	18.85	19.09	22.48	20.69	20.79	32010299	274289	480983	924930	292849	516471	4109935	1.96794e+06	3.71102e+06	4295929	3.63285e+06	854782	563989	473063	558447
P50890	RSSA_CHICK	RPSA	Small ribosomal subunit protein uS2	Uniprot_Gallus-gallus(chicken)_Rev+Unrev51565sequences_Jan2024	23	nucleus,plasma membrane,cytosolic small ribosomal subunit,90S preribosome	ribosomal small subunit assembly,endonucleolytic cleavage in ITS1 to separate SSU-rRNA from 5.8S rRNA and LSU-rRNA from tricistronic rRNA transcript (SSU-rRNA, 5.8S rRNA, LSU-rRNA),endonucleolytic cleavage to generate mature 3'-end of SSU-rRNA from (SSU-rRNA, 5.8S rRNA, LSU-rRNA),rRNA export from nucleus,translation	structural constituent of ribosome,laminin receptor activity,laminin binding	0.4473	0.2842	-0.1632	0.0281955	0.0945585	0.0419566	0.0510633	0.109223	0.0653899	20.77	20.72	20.93	20.77	20.79	20.65	20.82	20.64	20.54	20.5	21	20.85	21.03	20.96	21.48	20.53	20.66	31566603	1793541	1.7313e+06	2.00312e+06	1.78445e+06	1814957	1.64041e+06	1.857e+06	1.63827e+06	1.52853e+06	1.48717e+06	2.10316e+06	1.88996e+06	2.14327e+06	2.04574e+06
A0A8V0YUW3;Q8JFP1	A0A8V0YUW3_CHICK;IF4A2_CHICK	EIF4A2	ATP-dependent RNA helicase;Eukaryotic initiation factor 4A-II	Uniprot_Gallus-gallus(chicken)_Rev+Unrev51565sequences_Jan2024	38	;nucleolus,cytoplasm	;translational initiation,regulation of gene expression,RNA secondary structure unwinding	;translation initiation factor activity,ATP-dependent RNA helicase activity,ATP binding	-0.8642	-0.4841	0.3801	0.0152723	0.143289	0.0136681	0.0354357	0.142507	0.0332362	20.69	20.92	21.02	20.6	20.8	21.39	21.05	21.24	21.31	20.93	20.78	20.46	20.59	20.59	17.6	20.6	20.73	31153479	1.69058e+06	1.98456e+06	2.13179e+06	1.59301e+06	1827165	2.75732e+06	2.17167e+06	2.47986e+06	2.60713e+06	1992392	1802259	1.43978e+06	1.57794e+06	1.57826e+06
ENSEMBL	ENSP00000377550,ENSBTAP00000006074,ENSBTAP00000038329,ENSBTAP00000007350,ENSBTAP00000038253,ENSBTAP00000023402,ENSBTAP00000024466,ENSBTAP00000023055,ENSBTAP00000018229,ENSBTAP00000016046,ENSBTAP00000024462,ENSBTAP00000014147,ENSBTAP00000033053,ENSBTAP00000001528,ENSBTAP00000037665,ENSBTAP00000031900,ENSBTAP00000031360,ENSBTAP00000018574,ENSBTAP00000032840,ENSBTAP00000011227,ENSBTAP00000025008,ENS…		Tax_Id=9606 Gene_Symbol=KRT13 46 kDa protein,(Bos taurus) 81 kDa protein,(Bos taurus) 9 kDa protein,(Bos taurus) similar to Complement C4-A precursor,(Bos taurus) 63 kDa protein,(Bos taurus) 46 kDa protein,(Bos taurus) 44 kDa protein,(Bos taurus) 68 kDa protein,(Bos taurus) 54 kDa protein,(Bos taurus) similar to fibulin-1 C isoform 1,(Bos taurus) 47 kDa protein,(Bos taurus) 12 kDa protein,(Bos ta…	contaminants_mq1,6_headersForSpectronaut,contaminants_mq1,6_headersForSpectronaut,contaminants_mq1,6_headersForSpectronaut,contaminants_mq1,6_headersForSpectronaut,contaminants_mq1,6_headersForSpectronaut,contaminants_mq1,6_headersForSpectronaut,contaminants_mq1,6_headersForSpectronaut,contaminants_mq1,6_headersForSpectronaut,contaminants_mq1,6_headersForSpectronaut,contaminants_mq1,6_headersForS…	73				0.8341	0.6874	-0.1467	0.00989121	0.0175335	0.343791	0.0278887	0.0384799	0.24802	20.69	20.11	20.64	20.57	20.73	20.69	20.11	20.24	20.4	20.58	21.03	21.05	20.92	21.43	21.68	20.8	20.81	30916385	1.69173e+06	1.13446e+06	1.63439e+06	1.56144e+06	1.73587e+06	1.69194e+06	1.13373e+06	1.23795e+06	1379110	1.56496e+06	2.14171e+06	2.17775e+06	1.98852e+06	2.83274e+06
Q5ZMT0	1433E_CHICK	YWHAE	14-3-3 protein epsilon	Uniprot_Gallus-gallus(chicken)_Rev+Unrev51565sequences_Jan2024	26	nucleus,cytoplasm,mitochondrion,plasma membrane	MAPK cascade,neuron migration,protein targeting,hippocampus development,cerebral cortex development,cellular response to heat,positive regulation of protein export from nucleus,regulation of cytosolic calcium ion concentration,regulation of membrane repolarization,regulation of potassium ion transmembrane transporter activity,negative regulation of calcium ion transmembrane transporter activity,n…	calcium channel regulator activity,potassium channel regulator activity,protein domain specific binding,ubiquitin protein ligase binding,identical protein binding,histone deacetylase binding,ion channel binding,cadherin binding,protein heterodimerization activity,phosphoserine binding,scaffold protein binding	-0.0416	0.1675	0.2091	0.875629	0.567157	0.101655	0.433725	0.331539	0.114515	20.56	20.61	20.97	20.49	20.6	20.74	20.88	20.8	20.77	21.11	20.81	20.39	20.62	20.41	21.55	20.64	20.69	30445273	1.54663e+06	1.60332e+06	2.06001e+06	1.46897e+06	1.59366e+06	1.75472e+06	1.9274e+06	1.82889e+06	1.7876e+06	2264301	1.8422e+06	1371465	1.61105e+06	1.39368e+06
Q910C5	Q910C5_CHICK		Myosin-7	Uniprot_Gallus-gallus(chicken)_Rev+Unrev51565sequences_Jan2024	186				5.0728	-1.8451	-6.9179	0.00419774	0.0127012	0.00480949	0.0180088	0.0318758	0.0192324	22.29	21.52	20.88	22.48	22.24	14.63	14.72	15.08	15.52	15.23	19.84	20.29	20.61	20.48	19.02	20.58	20.61	30017763	5116978	3.01308e+06	1.92989e+06	5.85395e+06	4955209	25386	26900.8	34660.5	47111.7	38530.6	937155	1.28433e+06	1.5966e+06	1.45757e+06
F1NIX0	F1NIX0_CHICK	RPL8	Large ribosomal subunit protein uL2	Uniprot_Gallus-gallus(chicken)_Rev+Unrev51565sequences_Jan2024	37	cytosolic large ribosomal subunit,polysomal ribosome	cytoplasmic translation	RNA binding,structural constituent of ribosome,poly(A) RNA binding	0.4804	0.3445	-0.1359	0.357885	0.48337	0.227174	0.25426	0.302192	0.191609	20.64	20.59	20.42	20.87	20.9	20.63	20.46	20.58	20.51	20.62	20.49	20.61	20.55	20.68	22.11	20.42	20.54	29977369	1.63876e+06	1.58212e+06	1.40554e+06	1.92178e+06	1.95915e+06	1.62546e+06	1.44339e+06	1.56516e+06	1493401	1.61517e+06	1476043	1.60365e+06	1.53006e+06	1.68006e+06
A0A8V0ZK82	A0A8V0ZK82_CHICK	SRSF5	Serine and arginine rich splicing factor 5	Uniprot_Gallus-gallus(chicken)_Rev+Unrev51565sequences_Jan2024	13				1.2193	1.0715	-0.1478	0.0919559	0.113071	0.551014	0.10715	0.122921	0.32597	20.41	20.13	20.6	20.47	20.13	19.69	20.68	19.86	19.83	20.66	21.1	21.03	20.78	21.08	22.45	20.47	20.53	29916964	1.38977e+06	1.14708e+06	1.59317e+06	1451611	1.14996e+06	847233	1.68389e+06	954235	929237	1.66138e+06	2.25219e+06	2.13469e+06	1.8016e+06	2.21339e+06
A0A1D5P9P3	A0A1D5P9P3_CHICK	ACTN1	Alpha-actinin-1	Uniprot_Gallus-gallus(chicken)_Rev+Unrev51565sequences_Jan2024	78				0.665	0.2158	-0.4492	0.089382	0.454627	0.00348393	0.105293	0.291983	0.0164767	20.87	20.72	20.64	20.96	20.79	20.47	20.57	20.45	20.2	20	21.22	21.2	21.28	21.24	19.45	20.6	20.61	29627545	1.91651e+06	1.72391e+06	1.63369e+06	2.04102e+06	1.81779e+06	1.44819e+06	1555114	1.43429e+06	1.20281e+06	1.04913e+06	2.44929e+06	2416824	2.54904e+06	2475178
P02007	HBPI_CHICK		Hemoglobin subunit pi	Uniprot_Gallus-gallus(chicken)_Rev+Unrev51565sequences_Jan2024	14	hemoglobin complex	negative regulation of transcription from RNA polymerase II promoter,oxygen transport,erythrocyte maturation	oxygen transporter activity,iron ion binding,oxygen binding,heme binding	-1.7591	1.6168	3.376	0.00519483	0.177598	0.00279734	0.0199776	0.163984	0.0147525	18.22	18.69	18.61	18.39	18.46	22.18	21.27	21.77	22.33	21.47	19.34	19.34	19.08	19.55	21.5	20.5	20.69	29627350	306149	421771	398805	343692	360145	4.74823e+06	2.52285e+06	3.56421e+06	5.25971e+06	2.90917e+06	661404	663048	552344	767432
A0A1D5PS29	A0A1D5PS29_CHICK	EEF2	Eukaryotic translation elongation factor 2	Uniprot_Gallus-gallus(chicken)_Rev+Unrev51565sequences_Jan2024	83			GTPase activity,GTP binding	-0.7973	-0.1532	0.6441	0.067134	0.729711	0.00122389	0.087722	0.386686	0.00973671	20.34	20.61	20.71	20.34	20.58	21.22	20.94	21.28	21.37	20.99	20.07	19.68	19.83	19.83	21.5	20.59	20.61	29263064	1.32829e+06	1.60192e+06	1.71598e+06	1.32688e+06	1.56244e+06	2.43844e+06	2.0097e+06	2.54252e+06	2.70339e+06	2.08236e+06	1.10305e+06	841518	933834	934156
A0A8V0Z0U1	A0A8V0Z0U1_CHICK	ENO1	phosphopyruvate hydratase	Uniprot_Gallus-gallus(chicken)_Rev+Unrev51565sequences_Jan2024	36				-1.6606	-1.0966	0.564	0.00118125	0.00582305	0.0244325	0.00954377	0.0211192	0.0468702	20.54	20.81	21.14	20.19	20.77	21.21	20.75	21.3	21.52	21.53	19.93	19.46	19.42	19.54	19.74	20.61	20.64	28769555	1.5296e+06	1.84269e+06	2314327	1.1935e+06	1.78701e+06	2.43219e+06	1.76047e+06	2.58781e+06	3.01466e+06	3017908	997420	718723	703241	760502
A0A8V0XQN1;F1NM49	A0A8V0XQN1_CHICK;F1NM49_CHICK	MYH15	Myosin, heavy chain 15;Myosin, heavy chain 15	Uniprot_Gallus-gallus(chicken)_Rev+Unrev51565sequences_Jan2024	168	;	;	;	-1.7589	-0.0741	1.6847	0.0147508	0.855514	0.0137055	0.0347467	0.427866	0.0332711	20.16	19.34	17.98	20.58	20.19	21.23	20.92	21.12	22.16	22.01	19.41	19.94	20.12	20.16	19.21	20.66	20.64	28381691	1.17146e+06	665488	259050	1.56494e+06	1.19838e+06	2.46028e+06	1.97908e+06	2286754	4673101	4.22259e+06	694972	1.00513e+06	1.13661e+06	1.17126e+06
A0A1D5PYU1;A0A8V1A202;A0A8V1A495;A0A8V1A4B1	A0A1D5PYU1_CHICK;A0A8V1A202_CHICK;A0A8V1A495_CHICK;A0A8V1A4B1_CHICK	COL1A1	Collagen type I alpha 1 chain	Uniprot_Gallus-gallus(chicken)_Rev+Unrev51565sequences_Jan2024	33	;;;	;;;	;;;	-0.3107	0.1615	0.4723	0.600646	0.752226	0.441217	0.343004	0.394375	0.287024	20.23	20.35	21.38	19.65	19.92	20.21	20.86	20.18	20.35	22.01	21.36	20.9	20.73	20.19	18.51	20.54	20.6	28041262	1.22807e+06	1.33742e+06	2.72926e+06	824154	990143	1213767	1.8974e+06	1.1848e+06	1.33485e+06	4.23142e+06	2691724	1.95688e+06	1737515	1193064
P02127	HBRH_CHICK		Hemoglobin subunit rho	Uniprot_Gallus-gallus(chicken)_Rev+Unrev51565sequences_Jan2024	11	hemoglobin complex	oxygen transport	oxygen transporter activity,iron ion binding,oxygen binding,heme binding	-1.6903	1.6544	3.3446	0.00957467	0.250965	0.00185234	0.0274005	0.203919	0.0120515	18.11	18.69	18.63	17.98	18.37	22.01	21.1	21.81	22.1	21.38	19.12	18.88	18.77	19.24	21.64	20.77	20.72	27966795	282039	422424	406963	258900	339340	4.22361e+06	2240246	3664087	4.50361e+06	2.73643e+06	570162	483181	448247	618051
A0A8V0ZQB8	A0A8V0ZQB8_CHICK	MYBPC3	Myosin binding protein C3	Uniprot_Gallus-gallus(chicken)_Rev+Unrev51565sequences_Jan2024	114				-0.8478	-1.447	-0.5992	0.0179921	0.000808549	1.8521e-06	0.0390226	0.00796598	0.000534973	21.25	21.12	21.19	21.29	21.26	20.68	20.58	20.55	20.56	20.73	19.96	20.07	20.2	19.94	17.19	20.55	20.55	27861507	2.48833e+06	2.2769e+06	2.3946e+06	2.5652e+06	2504494	1685255	1565439	1.53783e+06	1.5418e+06	1.7428e+06	1.02209e+06	1.10209e+06	1.20719e+06	1.00482e+06
F1NN16	F1NN16_CHICK	RPS7	40S ribosomal protein S7	Uniprot_Gallus-gallus(chicken)_Rev+Unrev51565sequences_Jan2024	26	90S preribosome,small-subunit processome,cytosolic small ribosomal subunit	ribosomal small subunit biogenesis,rRNA processing		-0.0566	-0.1122	-0.0556	0.774287	0.57526	0.421415	0.401887	0.334486	0.279655	20.63	20.53	20.7	20.75	20.84	20.73	20.7	20.64	20.52	20.59	20.9	20.59	20.75	20.75	19.61	20.53	20.48	27455346	1.61967e+06	1.51007e+06	1.70814e+06	1760171	1.87989e+06	1.73434e+06	1.70053e+06	1.63518e+06	1.50371e+06	1.58381e+06	1.95238e+06	1.57668e+06	1.75836e+06	1.75798e+06
A0A8V0XYP5	A0A8V0XYP5_CHICK	HNRNPU	Heterogeneous nuclear ribonucleoprotein U	Uniprot_Gallus-gallus(chicken)_Rev+Unrev51565sequences_Jan2024	46				0.2904	0.2557	-0.0347	0.286927	0.326335	0.705924	0.221731	0.240242	0.378823	20.45	20.53	20.56	20.61	20.5	20.65	20.52	20.55	20.58	20.14	21.01	20.92	20.99	21.01	19.54	20.41	20.41	26822639	1.43372e+06	1.50997e+06	1550574	1600945	1.48622e+06	1.64551e+06	1499951	1.53615e+06	1.56765e+06	1.15183e+06	2.11159e+06	1.98526e+06	2.08246e+06	2.1071e+06
Q5ZKK8	Q5ZKK8_CHICK	RPL19	Ribosomal protein L19	Uniprot_Gallus-gallus(chicken)_Rev+Unrev51565sequences_Jan2024	23	cytosolic large ribosomal subunit,polysomal ribosome	cytoplasmic translation	structural constituent of ribosome	-0.1993	0.0164	0.2157	0.712875	0.977723	0.0986643	0.381221	0.464635	0.112399	20.53	20.34	20.2	20.74	20.77	20.78	20.68	20.75	20.7	20.82	19.76	20	20.14	19.54	21.86	20.41	20.4	26816045	1.5097e+06	1.32607e+06	1.20616e+06	1.7521e+06	1.78551e+06	1.79755e+06	1.68347e+06	1.76281e+06	1.70578e+06	1851950	887168	1.04676e+06	1155930	762503
A0A1D5P8I3	A0A1D5P8I3_CHICK	SFPQ	Splicing factor proline and glutamine rich	Uniprot_Gallus-gallus(chicken)_Rev+Unrev51565sequences_Jan2024	54				0.6588	0.3886	-0.2701	2.55962e-05	0.000475123	0.0092147	0.00167303	0.00611522	0.026831	20.41	20.48	20.52	20.7	20.58	20.37	20.45	20.24	20.17	20.1	20.93	20.94	20.96	20.76	21.04	20.41	20.44	26761153	1.39639e+06	1.45905e+06	1.50194e+06	1.7012e+06	1.57179e+06	1.35437e+06	1.42931e+06	1.23511e+06	1.18135e+06	1.12728e+06	1998343	2.01787e+06	2042927	1.77198e+06
Q5ZHZ0	DX39B_CHICK	DDX39B	Spliceosome RNA helicase DDX39B	Uniprot_Gallus-gallus(chicken)_Rev+Unrev51565sequences_Jan2024	35	spliceosomal complex,nucleolus,cytoplasm,nuclear speck	mRNA splicing, via spliceosome,mRNA export from nucleus,cellular response to DNA damage stimulus,regulation of gene expression,RNA secondary structure unwinding,positive regulation of DNA-templated transcription, elongation,negative regulation of DNA damage checkpoint	RNA binding,ATP-dependent RNA helicase activity,ATP binding	0.2401	0.242	0.0019	0.534957	0.529598	0.985059	0.320455	0.31857	0.466749	20.39	20.49	20.63	20.65	20.38	20.64	20.54	20.59	20.58	20.16	21.06	21.03	21.06	21.03	17.55	20.36	20.4	26518718	1.3715e+06	1.47028e+06	1.62186e+06	1.64608e+06	1.36202e+06	1.63318e+06	1.52723e+06	1.58203e+06	1.56358e+06	1.17557e+06	2.1816e+06	2.1436e+06	2.18514e+06	2133886
A0A8V0XGL8	A0A8V0XGL8_CHICK	VIM	Vimentin	Uniprot_Gallus-gallus(chicken)_Rev+Unrev51565sequences_Jan2024	61				1.8491	2.0635	0.2144	0.000939442	0.0021417	0.594619	0.00849933	0.0129638	0.340765	19.53	19.46	19.36	19.61	19.65	19.58	19.48	19.28	19.03	20.69	21.09	21.39	21.59	21.66	22.04	20.3	20.32	26516473	754591	719467	674238	799985	823621	781400	733746	635257	535378	1690380	2.23304e+06	2753782	3.15846e+06	3314634
Q5ZKC9	1433Z_CHICK	YWHAZ	14-3-3 protein zeta	Uniprot_Gallus-gallus(chicken)_Rev+Unrev51565sequences_Jan2024	20	extracellular space,nucleus,mitochondrion	protein targeting,regulation of cell death,establishment of Golgi localization,Golgi reassembly	transcription factor binding,protein kinase binding,protein domain specific binding,ubiquitin protein ligase binding,identical protein binding,ion channel binding,cadherin binding	0.1566	0.4748	0.3182	0.784359	0.470032	0.00170574	0.405202	0.297787	0.0115178	20.22	20.31	20.49	20.14	20.26	20.56	20.51	20.63	20.71	20.61	20.41	20	20.09	20.03	22.02	20.38	20.48	26092239	1217276	1.29714e+06	1.47126e+06	1157218	1.25548e+06	1.55105e+06	1.49089e+06	1.61802e+06	1.71502e+06	1.60231e+06	1397876	1.04655e+06	1.11244e+06	1.0722e+06
A0A8V1AHJ0	A0A8V1AHJ0_CHICK		Tropomyosin alpha-1 chain	Uniprot_Gallus-gallus(chicken)_Rev+Unrev51565sequences_Jan2024	6				0.6713	0.148	-0.5233	0.345526	0.797468	0.129975	0.248774	0.409615	0.13402	20.91	20.11	20.19	21.14	20.77	19.72	20.49	19.74	19.65	20.79	20.35	20.22	20.1	20.24	22.06	20.06	20.22	25850621	1.97197e+06	1.12973e+06	1.1963e+06	2.30424e+06	1.79176e+06	862887	1.46952e+06	876827	820903	1.81014e+06	1.33423e+06	1.21962e+06	1.12732e+06	1.23932e+06
A0A8V1AMZ8	A0A8V1AMZ8_CHICK	HSPB1	Heat shock protein beta-1	Uniprot_Gallus-gallus(chicken)_Rev+Unrev51565sequences_Jan2024	2				-1.7755	-1.49	0.2855	0.072594	0.120586	0.663493	0.0921629	0.127756	0.364471	20.44	20.3	22.05	20.08	20.26	22.14	20.28	20.08	20.49	21.53	18.84	19.56	19.63	19.61	18.96	20.07	18.34	25713823	1423720	1.29172e+06	4348747	1.1117e+06	1255258	4.61929e+06	1.27684e+06	1.10517e+06	1.4705e+06	3.02325e+06	467881	772816	808983	798579
A0A8V1A7V4	A0A8V1A7V4_CHICK	SLC37A4	Small ribosomal subunit protein eS25	Uniprot_Gallus-gallus(chicken)_Rev+Unrev51565sequences_Jan2024	14				0.703	0.5924	-0.1106	0.312336	0.370509	0.29947	0.234034	0.259581	0.22785	20.32	20.05	20.47	20.41	20.4	20.43	20.34	20.16	20.13	20.06	20.29	20.3	20.4	20.4	22.15	20.08	20.26	25146678	1.30982e+06	1.08434e+06	1.45525e+06	1.39772e+06	1.38516e+06	1.41048e+06	1324490	1.17211e+06	1145687	1.09015e+06	1.27966e+06	1.29097e+06	1385055	1.37921e+06
A0A8V0ZFC6;Q8UWG7	A0A8V0ZFC6_CHICK;Q8UWG7_CHICK	RPL6;	60S ribosomal protein L6	Uniprot_Gallus-gallus(chicken)_Rev+Unrev51565sequences_Jan2024	31	;cytosolic large ribosomal subunit	;ribosomal large subunit assembly,cytoplasmic translation	;RNA binding,structural constituent of ribosome,poly(A) RNA binding	0.7291	0.2504	-0.4787	0.0218577	0.25237	0.0114997	0.0438175	0.204564	0.0301839	20.64	20.51	20.14	20.71	20.73	20.22	20.11	20.13	20.1	19.83	20.51	20.74	20.61	20.72	21.33	20.3	20.32	25116369	1631814	1.49458e+06	1.15556e+06	1.71685e+06	1.74486e+06	1.22358e+06	1128047	1.14675e+06	1.12402e+06	934760	1495098	1.75156e+06	1.59905e+06	1.72179e+06
A0A8V0ZQT1	A0A8V0ZQT1_CHICK	HNRNPH3	Heteroous nuclear ribonucleoprotein H3	Uniprot_Gallus-gallus(chicken)_Rev+Unrev51565sequences_Jan2024	20				1.1289	0.8529	-0.276	0.00547369	0.0142942	0.0866195	0.0205116	0.0340674	0.103227	20.27	20	20.26	20.32	20.3	19.78	20.29	19.82	19.59	20.18	20.87	20.89	20.96	20.96	21.61	20.32	20.34	25021937	1.26254e+06	1.04533e+06	1.25521e+06	1.30894e+06	1.29089e+06	898851	1286213	927458	791706	1185741	1.91249e+06	1.93706e+06	2.04555e+06	2.03349e+06
A0A8V0YP06;P08288	A0A8V0YP06_CHICK;H11R_CHICK		H15 domain-containing protein;Histone H1.11R	Uniprot_Gallus-gallus(chicken)_Rev+Unrev51565sequences_Jan2024	5	;nucleosome,nucleus	;nucleosome assembly	;DNA binding	1.1428	0.8559	-0.2869	0.0355835	0.0637461	0.0387835	0.058939	0.0850907	0.0621308	20.12	20	20.22	20.38	20.43	20.09	20.14	19.96	19.86	19.67	20.77	20.96	20.81	20.72	21.86	19.92	20.38	24844900	1.13894e+06	1.04884e+06	1.22465e+06	1.36652e+06	1.41644e+06	1.1157e+06	1.15886e+06	1.01827e+06	953163	832051	1.78525e+06	2038138	1.8409e+06	1733082
A0A8V0XDB2	A0A8V0XDB2_CHICK	MTHFD2L	methenyltetrahydrofolate cyclohydrolase	Uniprot_Gallus-gallus(chicken)_Rev+Unrev51565sequences_Jan2024	3				-0.987	-0.1418	0.8451	0.0970977	0.83391	0.00459042	0.111117	0.421088	0.0188081	20.21	20.2	20.54	19.62	20.24	20.97	20.46	21.26	21.2	21.16	19.47	18.94	18.9	19.36	21.54	20.24	20.34	24746959	1.2087e+06	1.20557e+06	1.52955e+06	804636	1.24182e+06	2.05224e+06	1.43877e+06	2511678	2.40899e+06	2.34933e+06	726929	501221	487941	671603
Q5ZMD1	1433T_CHICK	YWHAQ	14-3-3 protein theta	Uniprot_Gallus-gallus(chicken)_Rev+Unrev51565sequences_Jan2024	21	cytoplasm		protein domain specific binding	-0.2955	0.3352	0.6306	0.409705	0.4503	0.000664297	0.275099	0.290438	0.00722473	20.03	20.13	20.41	19.74	20.23	20.65	20.67	20.72	20.72	20.98	20.27	19.83	20.12	19.98	21.43	20.37	20.46	24568033	1.07153e+06	1.14873e+06	1.39142e+06	873257	1.22876e+06	1.64425e+06	1.66869e+06	1.72858e+06	1730079	2.07466e+06	1.26792e+06	931722	1.14217e+06	1.03731e+06
A0A8V0ZMH3;P22451	A0A8V0ZMH3_CHICK;RL5_CHICK	RPL5	Ribosomal protein L5;Large ribosomal subunit protein uL18	Uniprot_Gallus-gallus(chicken)_Rev+Unrev51565sequences_Jan2024	28	;nucleolus,cytosolic large ribosomal subunit	;ribosomal large subunit assembly,translation	;structural constituent of ribosome,5S rRNA binding,poly(A) RNA binding	0.1062	-0.1029	-0.209	0.492411	0.454159	0.0202036	0.305241	0.291811	0.0419024	20.54	20.51	20.53	20.67	20.55	20.55	20.35	20.35	20.33	20.15	20.54	20.53	20.64	20.6	19.85	20.41	20.31	24321245	1.52874e+06	1.48853e+06	1517401	1.6682e+06	1.53367e+06	1.53831e+06	1.33743e+06	1332889	1.31751e+06	1.16685e+06	1.5201e+06	1.51277e+06	1633126	1.5941e+06
A0A1D5PD32	A0A1D5PD32_CHICK	DDX17	DEAD-box helicase 17	Uniprot_Gallus-gallus(chicken)_Rev+Unrev51565sequences_Jan2024	47			nucleic acid binding,helicase activity,ATP binding	0.1224	0.0063	-0.1161	0.733613	0.985352	0.154864	0.388035	0.466801	0.150159	20.39	20.48	20.66	20.47	20.43	20.51	20.39	20.39	20.41	20.15	20.83	20.78	20.8	20.74	17.42	20.38	20.32	24267962	1.37801e+06	1466654	1660174	1.45637e+06	1417128	1.49461e+06	1.37638e+06	1.37384e+06	1.3976e+06	1.16535e+06	1.85833e+06	1.80669e+06	1819582	1.75041e+06
P84229	H32_CHICK	H3-I	Histone H3.2	Uniprot_Gallus-gallus(chicken)_Rev+Unrev51565sequences_Jan2024	11	nucleosome,nucleus	nucleosome assembly	nucleosomal DNA binding,protein heterodimerization activity	0.2467	1.0573	0.8106	0.651895	7.60789e-05	0.321857	0.360648	0.00269865	0.238336	19.97	19.81	19.5	19.95	19.59	19.97	19.96	19.59	20.03	21.92	20.65	20.87	21.07	20.81	20.74	20.28	20.28	24267429	1.02477e+06	919137	741133	1.01592e+06	790966	1.02998e+06	1.02295e+06	791884	1.07235e+06	3.9614e+06	1.64037e+06	1.91008e+06	2.20545e+06	1.84402e+06
A0A8V1A9H2	A0A8V1A9H2_CHICK	SPTAN1	Spectrin alpha, non-erythrocytic 1	Uniprot_Gallus-gallus(chicken)_Rev+Unrev51565sequences_Jan2024	267				0.9584	0.3761	-0.5823	0.00820823	0.0951128	0.00108841	0.0252062	0.109638	0.00915827	20.54	20.38	20.22	20.63	20.6	19.95	20.13	19.93	19.78	19.67	20.49	20.76	20.73	20.83	21.34	20.27	20.24	24222985	1.52493e+06	1.36556e+06	1.21918e+06	1.62252e+06	1.59157e+06	1.01359e+06	1.14488e+06	996670	900317	835912	1474934	1773091	1740161	1.85947e+06
Q5ZLN1	PGAM1_CHICK	PGAM1	Phosphoglycerate mutase 1	Uniprot_Gallus-gallus(chicken)_Rev+Unrev51565sequences_Jan2024	29	cell,cytosol,myelin sheath	gluconeogenesis,glycolytic process,regulation of pentose-phosphate shunt	bisphosphoglycerate mutase activity,phosphoglycerate mutase activity,hydrolase activity,2,3-bisphosphoglycerate-dependent phosphoglycerate mutase activity	-1.3693	-0.5296	0.8398	0.00791242	0.316316	0.00267055	0.0246759	0.235889	0.0144245	19.89	20.25	20.74	19.68	20.43	21.05	20.64	21.13	21.23	21.29	19.52	18.85	18.93	18.94	20.99	20.01	20.25	23962396	969098	1.25086e+06	1.74811e+06	840033	1.41149e+06	2.16663e+06	1.63524e+06	2299211	2.46455e+06	2.56596e+06	749849	470986	499330	502212
Q5ZHW8	Q5ZHW8_CHICK	RPS14	Ribosomal protein S14	Uniprot_Gallus-gallus(chicken)_Rev+Unrev51565sequences_Jan2024	14	nucleolus,mitochondrion,cytosolic small ribosomal subunit	ribosomal small subunit assembly,negative regulation of transcription from RNA polymerase II promoter,maturation of SSU-rRNA from tricistronic rRNA transcript (SSU-rRNA, 5.8S rRNA, LSU-rRNA),translation,regulation of translation,erythrocyte differentiation	structural constituent of ribosome,translation regulator activity,mRNA 5'-UTR binding,small ribosomal subunit rRNA binding	-0.0801	-0.0637	0.0163	0.423312	0.527446	0.870876	0.280384	0.317771	0.432392	20.29	20.47	20.3	20.6	20.62	20.39	20.51	20.36	20.4	20.71	20.2	20.48	20.37	20.33	20.59	20.06	20.21	23770103	1284412	1.456e+06	1.2901e+06	1.59319e+06	1607552	1.37174e+06	1.49656e+06	1.34566e+06	1.38219e+06	1.71749e+06	1.20736e+06	1.46604e+06	1351263	1.31744e+06
A0A8V0YDC1;P08286	A0A8V0YDC1_CHICK;H110_CHICK	HIST1H110;	Histone cluster 1, H1.10 (similar to human histone cluster 1, class H1s);Histone H1.10	Uniprot_Gallus-gallus(chicken)_Rev+Unrev51565sequences_Jan2024	2	;nucleosome,nucleus	;nucleosome assembly	;DNA binding	1.7919	1.3141	-0.4778	0.0197129	0.0338537	0.0203155	0.041328	0.0573085	0.0420107	19.59	19.7	20.21	20.01	20.01	19.65	19.68	19.37	19.05	19.37	21	20.99	20.95	20.77	22.05	19.71	20.12	22853407	788661	849830	1.21264e+06	1.05632e+06	1.05415e+06	825208	840563	675981	542541	678620	2.10331e+06	2.08802e+06	2.02665e+06	1.78568e+06
A0A175KE57;A0A8V0YW88;E1C453	A0A175KE57_CHICK;A0A8V0YW88_CHICK;E1C453_CHICK	;HNRNPK;HNRNPK	Heterogeneous nuclear ribonucleoprotein K	Uniprot_Gallus-gallus(chicken)_Rev+Unrev51565sequences_Jan2024	37	;;	;;	;;	0.4006	0.2884	-0.1122	0.0682089	0.141003	0.145742	0.0885998	0.14105	0.144106	20.18	20.27	20.39	20.39	20.24	20.29	20.32	20.16	20.08	20.04	20.75	20.76	20.71	20.65	19.87	20.18	20.22	22665336	1.19022e+06	1260743	1.37681e+06	1.37283e+06	1.23798e+06	1.28369e+06	1.31156e+06	1.17456e+06	1109639	1.07735e+06	1763031	1.77909e+06	1.71988e+06	1.6417e+06
A0A8V1AFP6;P32429	A0A8V1AFP6_CHICK;RL7A_CHICK	RPL7A	60S ribosomal protein L7a;Large ribosomal subunit protein eL8	Uniprot_Gallus-gallus(chicken)_Rev+Unrev51565sequences_Jan2024	31	;cytosolic large ribosomal subunit	;maturation of LSU-rRNA,translation	;RNA binding	0.7975	0.2645	-0.533	0.00817275	0.181181	0.01005	0.0251229	0.166093	0.0281313	20.36	20.32	20.01	20.63	20.59	19.98	20.02	19.93	19.84	19.52	20.37	20.54	20.58	20.61	21.11	20.03	20.08	22201420	1.34967e+06	1.3067e+06	1.05821e+06	1.62404e+06	1.58324e+06	1.03101e+06	1.06353e+06	999885	935697	753605	1.35599e+06	1529237	1.56337e+06	1.59895e+06
A0A8V0YPX1;A0A8V0YRM2;Q6B344	A0A8V0YPX1_CHICK;A0A8V0YRM2_CHICK;Q6B344_CHICK	ANXA6;ANXA6;	Annexin	Uniprot_Gallus-gallus(chicken)_Rev+Unrev51565sequences_Jan2024	72	;;	;;	;;	-0.5711	-0.3248	0.2463	0.00281121	0.19819	0.245632	0.0147722	0.176011	0.201037	20.07	20.48	20.8	19.68	20.35	20.66	20.2	20.65	20.72	20.55	20.21	19.68	19.92	19.94	20.17	20.22	20.2	21977938	1097556	1.45983e+06	1.8212e+06	837635	1334717	1.65349e+06	1201097	1649803	1.72577e+06	1.5405e+06	1.2112e+06	839098	991359	1.00711e+06
A0A1L1RT94	A0A1L1RT94_CHICK	RPL31	Large ribosomal subunit protein eL31	Uniprot_Gallus-gallus(chicken)_Rev+Unrev51565sequences_Jan2024	15				1.0633	0.8351	-0.2282	0.166751	0.228195	0.0522047	0.157584	0.192155	0.074996	19.96	19.81	20.16	20.09	20.14	19.88	20.02	19.82	19.52	19.76	20.22	20.08	20.31	20.7	22.02	20.16	20.25	21974948	1.02297e+06	916567	1.16798e+06	1.11279e+06	1157702	962647	1.06201e+06	922940	753579	889967	1.22168e+06	1.10696e+06	1.30208e+06	1.70929e+06
A0A8V1AKG8;A0A8V1ANY0	A0A8V1AKG8_CHICK;A0A8V1ANY0_CHICK	MYH7	Myosin-7	Uniprot_Gallus-gallus(chicken)_Rev+Unrev51565sequences_Jan2024	19	;	;	;	5.0818	-2.0811	-7.1628	0.00380556	0.0169695	0.00741873	0.0172471	0.0377491	0.0238542	21.88	21.03	20.3	22.17	21.86	14.07	14.01	14.36	15.03	14.45	19.34	19.62	20.03	19.72	18.39	20.04	20	21804199	3.86849e+06	2.14545e+06	1.29514e+06	4.72642e+06	3.79347e+06	17156.6	16479.9	21049	33363.4	22417.1	661480	804994	1.06905e+06	861770
A0A8V0XW08;P21566	A0A8V0XW08_CHICK;COF2_CHICK	CFL2	Cofilin-2	Uniprot_Gallus-gallus(chicken)_Rev+Unrev51565sequences_Jan2024	25	;nucleus,actin cytoskeleton,nuclear matrix,Z disc	;skeletal muscle tissue development,actin filament fragmentation,positive regulation of actin filament depolymerization,sarcomere organization,muscle cell cellular homeostasis	;actin filament binding	-0.2448	0.3561	0.6009	0.769025	0.724047	0.0516427	0.400123	0.38477	0.0744203	19.85	19.86	20.42	19.78	19.92	20.37	20.36	20.4	20.44	21.17	19.35	18.74	19.06	19.23	22.06	19.97	20.02	21787717	945898	949261	1.40189e+06	899465	990618	1.35553e+06	1.34702e+06	1.38407e+06	1.41836e+06	2.36234e+06	667599	438440	545197	613754
Q5ZME2	MDHC_CHICK	MDH1	Malate dehydrogenase, cytoplasmic	Uniprot_Gallus-gallus(chicken)_Rev+Unrev51565sequences_Jan2024	28	extracellular space,mitochondrion,cytosol	carbohydrate metabolic process,tricarboxylic acid cycle,oxaloacetate metabolic process,malate metabolic process,NADH metabolic process	L-malate dehydrogenase activity	-0.124	0.8179	0.9419	0.908375	0.585055	0.0053188	0.443765	0.337753	0.0202424	19.5	19.78	20.23	18.82	19.67	20.61	19.97	20.68	20.89	20.76	19.05	18.37	18.41	18.54	22.45	20.07	20.06	21730974	741172	902577	1.23098e+06	463664	833398	1.60007e+06	1.0235e+06	1.67449e+06	1.94638e+06	1.7698e+06	541736	339794	349413	381204
A0A452J861;P08284	A0A452J861_CHICK;H101_CHICK	HIST1H101;	Histone cluster 1, H1.01 (similar to human histone cluster 1, class H1s);Histone H1.01	Uniprot_Gallus-gallus(chicken)_Rev+Unrev51565sequences_Jan2024	3	;nucleosome,nucleus	;nucleosome assembly	;DNA binding	1.8762	1.253	-0.6232	0.0246769	0.049197	0.00212397	0.0471938	0.0722176	0.0129094	19.82	19.57	20.02	20.02	19.96	19.25	19.65	19.31	19	19.03	20.75	20.9	20.79	20.77	22.02	19.55	20.16	21525953	924448	779655	1.06651e+06	1.06662e+06	1.01999e+06	623808	820958	651211	523292	534236	1.769e+06	1.95925e+06	1.81786e+06	1.78796e+06
A0A8V0XJK4;Q5ZJ56	A0A8V0XJK4_CHICK;RL7_CHICK	RPL7	Large ribosomal subunit protein uL30	Uniprot_Gallus-gallus(chicken)_Rev+Unrev51565sequences_Jan2024	26	;polysome,cytosolic large ribosomal subunit	;maturation of LSU-rRNA from tricistronic rRNA transcript (SSU-rRNA, 5.8S rRNA, LSU-rRNA),cytoplasmic translation	;DNA binding,RNA binding,mRNA binding,structural constituent of ribosome,protein homodimerization activity,poly(A) RNA binding	0.3278	-0.0222	-0.35	0.0033083	0.874687	0.0617175	0.0160623	0.43349	0.0832357	20.57	20.31	19.87	20.61	20.48	20.04	20.13	20.02	20.09	19.93	20.23	20.52	20.37	20.45	20.27	20.18	20.15	21419705	1.55857e+06	1.30108e+06	960132	1.59866e+06	1.46718e+06	1.07583e+06	1.1473e+06	1.06461e+06	1.11757e+06	997197	1.22824e+06	1.50773e+06	1.35384e+06	1.42904e+06
A0A8V0YJ12;A0A8V0YJ34	A0A8V0YJ12_CHICK;A0A8V0YJ34_CHICK	HNRNPH1	Heteroous nuclear ribonucleoprotein H1	Uniprot_Gallus-gallus(chicken)_Rev+Unrev51565sequences_Jan2024	27	;	;	;	0.472	0.3504	-0.1215	0.00914493	0.0193588	0.335018	0.0267277	0.0408516	0.244296	20.32	20.12	20.17	20.21	20.06	19.96	20.2	19.86	19.8	20.37	20.52	20.63	20.62	20.66	20.15	20.2	20.16	21314706	1.30732e+06	1.13697e+06	1.18183e+06	1.20981e+06	1.09426e+06	1.02308e+06	1.20439e+06	953817	913382	1.35638e+06	1.50728e+06	1.62414e+06	1.6067e+06	1.65973e+06
E6N1V8;P63247	E6N1V8_CHICK;RACK1_CHICK	GNB2L1;RACK1	Small ribosomal subunit protein RACK1	Uniprot_Gallus-gallus(chicken)_Rev+Unrev51565sequences_Jan2024	27	;nucleus,cytoplasm,ribosome,plasma membrane,dendrite,neuronal cell body,perikaryon,perinuclear region of cytoplasm,cytosol,cytosolic small ribosomal subunit	;signal transduction,protein ubiquitination,negative regulation of Wnt signaling pathway,regulation of protein localization,regulation of cell division,rescue of stalled ribosome,regulation of establishment of cell polarity,positive regulation of gastrulation,positive regulation of protein phosphorylation	;ribosome binding,signal transducer activity,enzyme binding,protein kinase C binding	-0.6869	-0.5215	0.1654	0.0430215	0.11067	0.110428	0.0663784	0.121077	0.120894	20.26	20.38	20.5	20.22	20.35	20.72	20.32	20.52	20.59	20.37	20.16	20.01	20.13	20.11	17.1	20.15	20.18	21143019	1253715	1.36896e+06	1.48314e+06	1.22234e+06	1.33925e+06	1.72683e+06	1.31279e+06	1.50707e+06	1.5738e+06	1.35683e+06	1.16783e+06	1.05388e+06	1.14961e+06	1.13303e+06
P02001	HBAD_CHICK	HBAD	Hemoglobin subunit alpha-D	Uniprot_Gallus-gallus(chicken)_Rev+Unrev51565sequences_Jan2024	20	hemoglobin complex	oxygen transport	oxygen transporter activity,iron ion binding,oxygen binding,heme binding	-0.6855	2.1862	2.8717	0.443285	0.327714	0.00138518	0.287716	0.240863	0.0103279	17.46	18.06	19.03	17.3	18.13	21.14	20.07	21.11	21.2	21.22	19.06	18.55	18.41	18.18	22.24	20.12	20.17	20810756	179913	273871	534625	161382	286927	2.31201e+06	1.09954e+06	2.25737e+06	2410346	2436626	545335	384407	349085	296331
P84175	RS12_CHICK	RPS12	Small ribosomal subunit protein eS12	Uniprot_Gallus-gallus(chicken)_Rev+Unrev51565sequences_Jan2024	17	cytosolic small ribosomal subunit	translation	structural constituent of ribosome	0.7059	0.8953	0.1893	0.37314	0.29608	0.202898	0.260665	0.2261	0.178619	19.68	19.76	20.04	19.84	19.85	19.99	20.11	19.93	19.67	20.35	19.98	19.79	20.04	20.3	22.07	19.79	19.97	20676966	840656	885588	1077210	938278	944962	1.04469e+06	1.13164e+06	996901	834711	1.33606e+06	1.03077e+06	904349	1.07477e+06	1.29227e+06
Q9YHD2	Q9YHD2_CHICK	URP	Nuclear calmodulin-binding protein (Fragment)	Uniprot_Gallus-gallus(chicken)_Rev+Unrev51565sequences_Jan2024	43				0.8905	0.3063	-0.5843	0.000482255	0.027338	0.000108458	0.00614995	0.0502027	0.00317921	20.34	20.15	20.21	20.4	20.23	19.75	19.9	19.7	19.57	19.47	20.56	20.69	20.64	20.72	20.21	20.08	20.12	20610386	1.32551e+06	1.16394e+06	1.21546e+06	1.38523e+06	1.23181e+06	882419	979589	853129	777612	723941	1549642	1.69239e+06	1.63564e+06	1.72354e+06
F1P4R3	F1P4R3_CHICK	FHL2	Four and a half LIM domains 2	Uniprot_Gallus-gallus(chicken)_Rev+Unrev51565sequences_Jan2024	41	nucleus,Z disc	negative regulation of transcription from RNA polymerase II promoter,osteoblast differentiation,response to hormone,negative regulation of apoptotic process,atrial cardiac muscle cell development,ventricular cardiac muscle cell development,heart trabecula formation	transcription factor binding,identical protein binding,metal ion binding,transcription cofactor activity	-1.8661	-1.5142	0.3519	0.0251469	2.52429e-05	0.368402	0.0476964	0.00166835	0.258855	20.35	20.31	20.66	20.23	20.3	20.12	20.63	20.19	20.6	21.59	19.05	19	19.21	18.95	17.68	20.13	20.18	20246581	1.34013e+06	1.30065e+06	1.65718e+06	1.23006e+06	1.29446e+06	1.13855e+06	1.61932e+06	1.19552e+06	1.59404e+06	3.15953e+06	542316	523079	605825	507523
A0A8V1A8R2;F1NB02	A0A8V1A8R2_CHICK;F1NB02_CHICK	RPS8	40S ribosomal protein S8	Uniprot_Gallus-gallus(chicken)_Rev+Unrev51565sequences_Jan2024	20	;cytosolic small ribosomal subunit	;maturation of SSU-rRNA from tricistronic rRNA transcript (SSU-rRNA, 5.8S rRNA, LSU-rRNA)	;structural constituent of ribosome	-1.2692	-0.8534	0.4158	0.000425747	0.00268339	0.0295965	0.00581155	0.0144472	0.0526531	20.41	20.16	19.75	20.34	20.45	20.74	20.41	20.55	20.55	20.98	19.17	19.54	19.72	19.14	19.31	20.08	20.17	20216393	1396097	1.17314e+06	880382	1.32463e+06	1.43468e+06	1.7487e+06	1.39025e+06	1536624	1.53265e+06	2.07453e+06	588022	762227	862073	576313
O57535	NDK_CHICK		Nucleoside diphosphate kinase	Uniprot_Gallus-gallus(chicken)_Rev+Unrev51565sequences_Jan2024	18	ruffle,extracellular space,intracellular,mitochondrion,plasma membrane,lamellipodium	nucleoside diphosphate phosphorylation,GTP biosynthetic process,UTP biosynthetic process,CTP biosynthetic process,regulation of apoptotic process,negative regulation of apoptotic process,positive regulation of keratinocyte differentiation,regulation of epidermis development,positive regulation of epithelial cell proliferation	nucleoside diphosphate kinase activity,ATP binding,metal ion binding	0.3444	1.2286	0.8842	0.789743	0.483646	0.00291058	0.407097	0.302264	0.0149864	19.24	19.61	19.76	18.91	19.37	20.12	19.9	20.3	20.39	20.63	19	18.44	18.41	18.78	22.62	19.99	19.97	20095882	617188	799762	886994	492656	678377	1.14284e+06	977708	1.2942e+06	1372092	1.62709e+06	525095	354544	348634	449950
R4GM10	R4GM10_CHICK	ALDOC	Fructose-bisphosphate aldolase	Uniprot_Gallus-gallus(chicken)_Rev+Unrev51565sequences_Jan2024	35	mitochondrion	glycolytic process,fructose 1,6-bisphosphate metabolic process,epithelial cell differentiation	fructose-bisphosphate aldolase activity,cytoskeletal protein binding	-0.6513	0.1188	0.7701	0.443835	0.912102	0.00122955	0.287855	0.444925	0.00974128	19.67	19.96	20.24	19.4	19.81	20.62	20.24	20.66	20.81	20.67	18.61	18.21	18.28	18.36	21.84	20.04	20.08	20010709	835353	1020045	1.23772e+06	689855	919537	1610240	1.23805e+06	1657859	1.84441e+06	1.66912e+06	399779	302457	318121	336294
A0A8V0ZMG8	A0A8V0ZMG8_CHICK	FUBP1	Far upstream element binding protein 1	Uniprot_Gallus-gallus(chicken)_Rev+Unrev51565sequences_Jan2024	43				0.6731	0.8844	0.2114	0.310525	0.225329	0.145071	0.233239	0.19065	0.143684	19.69	19.65	19.76	19.87	19.87	19.91	20.04	19.79	19.78	20.33	20.21	20.02	20.07	20.09	21.84	19.87	19.94	19893643	848406	825416	886830	959646	956884	983687	1.08008e+06	903656	900196	1.31593e+06	1216617	1.06574e+06	1.10059e+06	1.1166e+06
A0A1D5P7C6	A0A1D5P7C6_CHICK	PA2G4	Proliferation-associated 2G4	Uniprot_Gallus-gallus(chicken)_Rev+Unrev51565sequences_Jan2024	36	cytoplasm			0.1073	0.0571	-0.0502	0.863585	0.925912	0.652421	0.430075	0.449028	0.360829	20.04	20.19	20.44	19.99	20.16	20.29	19.95	20.12	20.24	19.97	19.61	19.42	19.56	19.47	21.58	19.97	20.04	19856994	1.07699e+06	1.19918e+06	1.41784e+06	1.03803e+06	1.17412e+06	1.28626e+06	1.01414e+06	1.13792e+06	1.24164e+06	1.02429e+06	800903	702929	770433	728120
A0A8V0YV56;A0A8V0Z3A1	A0A8V0YV56_CHICK;A0A8V0Z3A1_CHICK	ANP32A	Acidic leucine-rich nuclear phosphoprotein 32 family member	Uniprot_Gallus-gallus(chicken)_Rev+Unrev51565sequences_Jan2024	16	;	;	;	0.3582	1.3031	0.9449	0.77184	0.446609	0.0102664	0.401217	0.289026	0.0284329	19.11	19.34	19.87	18.81	19.28	20.13	20.04	20.02	20.18	20.81	19.44	18.52	18.55	18.78	22.56	19.97	19.85	19668026	564808	663238	958690	459472	634567	1.15141e+06	1.07817e+06	1.0604e+06	1.18444e+06	1.84132e+06	711999	375637	384469	449633
A0A8V1A138	A0A8V1A138_CHICK	PCBP2	Poly(rC) binding protein 2	Uniprot_Gallus-gallus(chicken)_Rev+Unrev51565sequences_Jan2024	22				-0.513	-0.0296	0.4833	0.0615192	0.907431	8.19186e-05	0.083045	0.443412	0.00278709	19.94	19.92	20.05	19.99	19.96	20.41	20.41	20.41	20.59	20.46	20.25	20.12	20.21	20.08	18.39	20	20.04	19523360	1.00665e+06	993187	1086307	1.04297e+06	1.02275e+06	1.3913e+06	1.39153e+06	1.39251e+06	1.57968e+06	1.44715e+06	1.24663e+06	1135956	1.21633e+06	1.10504e+06
A0A8V0YUB1	A0A8V0YUB1_CHICK	RPL36A	Large ribosomal subunit protein eL42	Uniprot_Gallus-gallus(chicken)_Rev+Unrev51565sequences_Jan2024	12				0.4829	0.5224	0.0395	0.482167	0.449623	0.829316	0.301744	0.290169	0.419627	20.03	19.84	19.71	19.98	20.04	19.79	19.75	19.78	19.87	20.49	19.74	19.94	19.77	19.74	21.74	19.88	20	19263788	1.07371e+06	936330	854935	1.03751e+06	1.0766e+06	904904	883401	897185	955963	1.47569e+06	877503	1.00877e+06	892780	872692
P67883	RL30_CHICK	RPL30	Large ribosomal subunit protein eL30	Uniprot_Gallus-gallus(chicken)_Rev+Unrev51565sequences_Jan2024	10	nucleus,cytosolic large ribosomal subunit,polysomal ribosome	cytoplasmic translation,killing of cells of other organism,defense response to Gram-negative bacterium,Requires Ontology	RNA binding,structural constituent of ribosome	1.3278	0.876	-0.4518	0.0893696	0.167044	0.00427656	0.105286	0.15777	0.0181575	19.85	19.66	19.91	20.05	19.91	19.46	19.69	19.57	19.21	19.16	20.11	20.11	20.44	20.53	21.8	19.81	19.84	19093901	947397	827307	983322	1.08744e+06	986970	722071	845655	776749	604646	584105	1.1342e+06	1.13322e+06	1.42465e+06	1513564
P41125	RL13_CHICK	RPL13	Large ribosomal subunit protein eL13	Uniprot_Gallus-gallus(chicken)_Rev+Unrev51565sequences_Jan2024	22	cytosolic large ribosomal subunit	translation	RNA binding,structural constituent of ribosome	-1.0535	-0.468	0.5855	0.00527176	0.0319137	0.0336794	0.0201228	0.0552285	0.0571153	20.11	19.91	19.7	20.12	20.1	20.43	20.46	20.33	20.45	21.1	19.26	19.56	19.87	18.88	19.84	20.03	20.03	19007291	1132918	986416	850880	1.13978e+06	1.12132e+06	1411379	1.44476e+06	1.32197e+06	1.42851e+06	2243224	629974	774305	957519	480826
P18359	DEST_CHICK	DSTN	Destrin	Uniprot_Gallus-gallus(chicken)_Rev+Unrev51565sequences_Jan2024	24	actin cytoskeleton	actin filament depolymerization,positive regulation of actin filament depolymerization,actin filament severing	actin filament binding	0.3139	1.3744	1.0606	0.787305	0.414843	0.00114594	0.40627	0.277023	0.00940842	19.01	19.22	19.56	18.96	19.22	20.19	19.92	20.24	20.31	20.61	19.22	18.65	18.89	19.03	22.47	19.68	19.81	18981616	529653	610343	774812	509000	609460	1.19563e+06	991279	1.23755e+06	1.29907e+06	1.60319e+06	610564	412371	485984	534258
P47838	RS6_CHICK	RPS6	Small ribosomal subunit protein eS6	Uniprot_Gallus-gallus(chicken)_Rev+Unrev51565sequences_Jan2024	18	nucleus,cytosolic small ribosomal subunit	rRNA processing,translation,ribosomal small subunit biogenesis,glucose homeostasis	structural constituent of ribosome	-0.8774	-0.5616	0.3158	0.00026496	0.00399552	0.0166718	0.00479079	0.0176056	0.0373496	20.24	19.99	19.97	20.14	20.2	20.54	20.21	20.39	20.32	20.64	19.59	19.77	19.86	19.22	19.18	20.06	20.09	18758050	1.23696e+06	1.03939e+06	1.02431e+06	1.15441e+06	1.20771e+06	1.52239e+06	1.21458e+06	1375118	1.30611e+06	1.63031e+06	789478	893209	949894	609511
P02112	HBB_CHICK	HBB	Hemoglobin subunit beta	Uniprot_Gallus-gallus(chicken)_Rev+Unrev51565sequences_Jan2024	10	extracellular space,cell,hemoglobin complex	oxygen transport	oxygen transporter activity,iron ion binding,oxygen binding,heme binding,hemoglobin binding	-1.0911	1.39	2.4811	0.113144	0.320967	0.00192507	0.122956	0.237912	0.0122834	17.74	18.25	19.6	17.16	18.25	21	19.92	20.98	21.07	21.31	19.68	18.4	18.13	18.14	21.47	20.07	20.2	18718282	218221	311692	793698	146682	312813	2.093e+06	992852	2.06188e+06	2.20382e+06	2.60362e+06	842638	345949	286922	288319
Q9PU45	RADI_CHICK	RDX	Radixin	Uniprot_Gallus-gallus(chicken)_Rev+Unrev51565sequences_Jan2024	50	cytoplasm,cytoskeleton,plasma membrane	actin filament capping	actin binding	0.2716	0.1343	-0.1373	0.287243	0.575519	0.215203	0.22188	0.334583	0.18542	19.91	20.16	20.33	19.89	20.03	20.04	19.82	19.9	20.05	19.87	20.17	19.91	19.96	19.94	20.84	19.93	19.91	18581214	985074	1.17134e+06	1.32117e+06	974213	1.06925e+06	1.0756e+06	928519	977296	1.08234e+06	956045	1.17857e+06	984265	1.02068e+06	1005257
A0A8V0X091	A0A8V0X091_CHICK	LOC107050559	Fructose-bisphosphate aldolase	Uniprot_Gallus-gallus(chicken)_Rev+Unrev51565sequences_Jan2024	36				0.14	0.8147	0.6747	0.893425	0.541591	0.0136106	0.439138	0.322831	0.0331524	19.25	19.65	20.05	18.9	19.65	20.39	19.69	20.23	20.47	20.24	19.27	18.62	18.78	18.77	22.21	19.81	19.79	18567180	621669	821783	1.08874e+06	488109	823972	1370632	848333	1.22873e+06	1.45292e+06	1.23604e+06	630076	401860	448704	445612
A0A8V1AMG6;F1NQW8;Q5ZML3	A0A8V1AMG6_CHICK;F1NQW8_CHICK;SRSF1_CHICK	SRSF1	Splicing factor, arginine/serine-rich 1;Splicing factor, arginine/serine-rich 1;Serine/arginine-rich splicing factor 1	Uniprot_Gallus-gallus(chicken)_Rev+Unrev51565sequences_Jan2024	33	;;cytoplasm,nuclear speck	;;mRNA processing,RNA splicing	;;RNA binding	0.9968	0.9677	-0.0291	0.119999	0.125284	0.881057	0.127349	0.130869	0.435255	19.67	19.48	19.86	19.65	19.69	19.45	19.96	19.33	19.21	20.06	20.4	20.22	20.01	20.24	21.64	19.95	19.93	18463390	834018	729880	951200	821716	844430	718303	1.02329e+06	656990	604390	1.09475e+06	1.38113e+06	1.22501e+06	1.05769e+06	1.2375e+06
Q5ZJZ2	Q5ZJZ2_CHICK	RCJMB04_14e22	Large ribosomal subunit protein uL3	Uniprot_Gallus-gallus(chicken)_Rev+Unrev51565sequences_Jan2024	39	cytosolic large ribosomal subunit	ribosomal large subunit assembly	structural constituent of ribosome	-0.1482	-0.2231	-0.0748	0.080535	0.0415935	0.423341	0.0984947	0.065015	0.280393	20.19	20.07	19.81	20.16	20.21	20.14	19.86	19.97	19.98	20.13	19.67	19.91	19.97	19.85	19.94	19.9	19.86	17626384	1.1947e+06	1.10038e+06	916481	1.17158e+06	1.21166e+06	1.15354e+06	952247	1.02356e+06	1032516	1.15009e+06	834048	988116	1.02352e+06	943044
A0A1D5NYG3;A0A3Q2U9M2;A0A8V1A9S9	A0A1D5NYG3_CHICK;A0A3Q2U9M2_CHICK;A0A8V1A9S9_CHICK	FLNB	Filamin B	Uniprot_Gallus-gallus(chicken)_Rev+Unrev51565sequences_Jan2024	157	;;	actin cytoskeleton organization,cell differentiation;;	actin binding;;	1.1547	1.4908	0.3361	0.00131782	0.000984979	0.016477	0.0100733	0.00872355	0.0370726	19.33	19.16	19.07	19.25	19.38	19.71	19.5	19.79	19.53	19.32	20.55	20.61	20.54	20.78	21.11	19.78	19.78	17542002	661293	586890	549650	623522	682096	856542	742977	903679	758798	655571	1.53704e+06	1.59912e+06	1529119	1.80108e+06
F1NH93	F1NH93_CHICK	RPS20	Small ribosomal subunit protein uS10	Uniprot_Gallus-gallus(chicken)_Rev+Unrev51565sequences_Jan2024	8	cytosolic small ribosomal subunit,small ribosomal subunit	cytoplasmic translation	RNA binding,structural constituent of ribosome	-0.1833	-0.164	0.0193	0.0600722	0.142399	0.799299	0.081821	0.141943	0.410231	20.02	19.99	20.27	19.96	19.89	20.13	20.02	20.08	19.96	20.07	19.82	19.66	19.78	20.09	19.96	19.95	19.79	17525162	1.06647e+06	1.04274e+06	1.26386e+06	1.02229e+06	973897	1.14536e+06	1.06451e+06	1.10604e+06	1.02293e+06	1.10261e+06	923571	830811	898184	1.11952e+06
Q6EE60	Q6EE60_CHICK		Ribosomal protein L18 (Fragment)	Uniprot_Gallus-gallus(chicken)_Rev+Unrev51565sequences_Jan2024	15				0.8506	0.3321	-0.5185	0.0213311	0.182336	0.0035297	0.0431793	0.166787	0.0165852	20.01	19.99	19.68	20.21	20.11	19.61	19.57	19.55	19.55	19.12	19.98	20.14	20.19	20.29	20.91	19.78	19.86	17450670	1.05238e+06	1.04133e+06	842528	1.21055e+06	1.1294e+06	800796	777916	767537	767430	569636	1.03085e+06	1.15705e+06	1.1972e+06	1.28531e+06
A0A8V1ABE3;A0A8V1AGP8;A0A8V1AIT2	A0A8V1ABE3_CHICK;A0A8V1AGP8_CHICK;A0A8V1AIT2_CHICK	RPL23A	Ribosomal protein L23a	Uniprot_Gallus-gallus(chicken)_Rev+Unrev51565sequences_Jan2024	13	;;	;;	;;	1.2569	0.9152	-0.3417	0.159781	0.236161	0.0111831	0.153311	0.196016	0.0297292	19.64	19.55	19.77	19.76	19.77	19.35	19.66	19.28	19.09	19.36	19.89	19.85	20.06	20.26	21.84	19.68	19.79	17412628	815311	766442	896563	887796	895589	668869	828512	636634	557321	671559	972876	947228	1093329	1.25934e+06
P42558	RAN_CHICK	RAN	GTP-binding nuclear protein Ran	Uniprot_Gallus-gallus(chicken)_Rev+Unrev51565sequences_Jan2024	18	nucleus,nuclear envelope,cytoplasm,cytosol	ribosomal subunit export from nucleus,mitotic sister chromatid segregation,protein import into nucleus,GTP metabolic process,snRNA import into nucleus	magnesium ion binding,GTPase activity,GTP binding	-2.4613	-1.0129	1.4484	0.000422432	0.000280326	0.00142374	0.00579457	0.00488707	0.0104659	19.46	19.45	19.57	19.21	19.66	20.92	20.39	20.93	21.06	21.2	18.66	18.49	18.69	18.67	17.49	19.76	19.92	17286414	719669	715699	779864	605216	826652	1989987	1.37448e+06	1.99408e+06	2.18581e+06	2.40884e+06	414802	368273	423189	416735
A0A8V1AJS6	A0A8V1AJS6_CHICK	CCT3	T-complex protein 1 subunit gamma	Uniprot_Gallus-gallus(chicken)_Rev+Unrev51565sequences_Jan2024	51				-0.0288	-0.0803	-0.0515	0.865779	0.61119	0.547408	0.430932	0.346681	0.324699	20.01	20	19.97	19.93	20.14	20.05	19.87	20.07	20.08	19.69	20	20.09	20.11	20.08	19.19	19.86	19.85	17271584	1.05511e+06	1.04993e+06	1.02606e+06	999492	1.15243e+06	1.08791e+06	956391	1.09728e+06	1.11204e+06	844033	1.05159e+06	1.11379e+06	1.13054e+06	1.10468e+06
A0A8V0ZGP2	A0A8V0ZGP2_CHICK	RPL23	Large ribosomal subunit protein uL14	Uniprot_Gallus-gallus(chicken)_Rev+Unrev51565sequences_Jan2024	10				-1.4987	-0.662	0.8368	0.00211989	0.038388	0.0158294	0.0129054	0.0617631	0.036186	19.82	19.53	19.67	19.93	19.89	20.59	20.56	20.32	20.3	21.12	19.06	19.29	19.84	18.7	18.08	19.77	19.95	17227937	926863	755010	833274	995860	972307	1.58326e+06	1.54061e+06	1.30522e+06	1.29148e+06	2.28676e+06	546778	642281	940122	426397
P18660	RLA1_CHICK	RPLP1	Large ribosomal subunit protein P1	Uniprot_Gallus-gallus(chicken)_Rev+Unrev51565sequences_Jan2024	6	cytosolic large ribosomal subunit	cytoplasmic translation,translational elongation,activation of protein kinase activity,positive regulation of protein kinase activity	structural constituent of ribosome,protein kinase activator activity	0.5391	0.7149	0.1757	0.0289323	0.0248026	0.589853	0.0518712	0.0473169	0.339295	18.88	18.99	19.57	19.95	20.28	19.86	20.19	19.3	19.38	20.11	19.95	20.44	20.4	20.21	20.67	19.65	19.98	17223212	483351	522398	778042	1.01527e+06	1.27637e+06	949864	1.19743e+06	646319	681715	1.12806e+06	1.01255e+06	1.41868e+06	1.37948e+06	1.20973e+06
P08250	APOA1_CHICK	APOA1	Apolipoprotein A-I	Uniprot_Gallus-gallus(chicken)_Rev+Unrev51565sequences_Jan2024	36	extracellular space,high-density lipoprotein particle,chylomicron,blood microparticle	cholesterol biosynthetic process,positive regulation of cholesterol esterification,positive regulation of triglyceride catabolic process,triglyceride catabolic process,regulation of intestinal cholesterol absorption,neuron projection regeneration,cholesterol efflux,phospholipid efflux,very-low-density lipoprotein particle remodeling,high-density lipoprotein particle assembly,lipoprotein metabolic…	protein binding,cholesterol binding,cholesterol transporter activity,phosphatidylcholine binding,phosphatidylcholine-sterol O-acyltransferase activator activity,high-density lipoprotein particle receptor binding,phospholipid binding	-0.5193	1.3691	1.8885	0.41693	0.220623	0.0175475	0.27784	0.188445	0.0384799	18.46	18.6	18.93	18.41	18.9	20.69	19.86	20.05	20.44	21.31	19.11	19.27	19.2	19.42	21.47	19.81	19.79	17089474	361382	397558	499047	348739	487818	1.69143e+06	954091	1.08831e+06	1.4198e+06	2.60117e+06	565074	633399	600827	703296
A0A8V1A0P0;A0A8V1A601	A0A8V1A0P0_CHICK;A0A8V1A601_CHICK	SRSF6	Serine and arginine rich splicing factor 6	Uniprot_Gallus-gallus(chicken)_Rev+Unrev51565sequences_Jan2024	21	;	;	;	1.1581	0.8994	-0.2588	0.051907	0.0847964	0.162502	0.0746997	0.101823	0.155023	19.76	19.35	19.63	19.67	19.57	19.22	19.73	19.07	18.91	19.62	20.2	20.22	19.99	20.28	21.36	19.83	19.7	16535013	889665	669175	813054	834763	778533	612752	867684	550463	491692	808270	1.20734e+06	1222740	1.04053e+06	1.27442e+06
A0A1D5PLH7	A0A1D5PLH7_CHICK	PRDX4	thioredoxin-dependent peroxiredoxin	Uniprot_Gallus-gallus(chicken)_Rev+Unrev51565sequences_Jan2024	18				1.1288	1.5258	0.397	0.371135	0.292462	0.0315964	0.259835	0.224498	0.0549145	19.36	18.85	18.97	19.07	19.29	19.53	19.36	19.59	19.2	19.83	19.51	19.47	19.42	19.69	22.3	19.69	19.59	16427994	670719	473379	513667	549769	639535	756177	672527	787028	601278	931892	748216	728058	702336	848363
A0A8V0YV66;P47836	A0A8V0YV66_CHICK;RS4_CHICK	RPS4Y1;RPS4	Ribosomal protein S4, Y-linked 1;Small ribosomal subunit protein eS4	Uniprot_Gallus-gallus(chicken)_Rev+Unrev51565sequences_Jan2024	27	;cytosolic small ribosomal subunit	;translation	;RNA binding,structural constituent of ribosome,rRNA binding,poly(A) RNA binding	-1.1453	-0.7941	0.3512	0.00234018	0.0241975	0.00745713	0.0135411	0.0465815	0.0239095	19.98	19.91	20.06	19.84	19.99	20.49	20.14	20.44	20.24	20.21	19.42	19.64	19.5	19.07	16.88	19.81	19.75	16325784	1.03112e+06	984967	1.09563e+06	937753	1.04326e+06	1.47356e+06	1.15589e+06	1.41998e+06	1.23485e+06	1.21209e+06	701782	819627	743534	551553
A0A8V1A9H8;Q5F3R9	A0A8V1A9H8_CHICK;Q5F3R9_CHICK	SET;RCJMB04_8c13	SET nuclear proto-onco;Protein SET	Uniprot_Gallus-gallus(chicken)_Rev+Unrev51565sequences_Jan2024	16	;	;	;	0.4929	1.6415	1.1486	0.707022	0.395342	0.00498632	0.379198	0.26942	0.0195948	18.44	18.82	19.48	18.37	18.78	19.85	19.87	19.67	19.86	20.52	19.19	18.04	18.3	18.9	22.42	19.46	19.52	16306214	356087	463808	732836	338027	450360	943203	958878	835145	952452	1.50059e+06	599751	269930	322747	488758
A0A8V0YZ19	A0A8V0YZ19_CHICK	NONO	Non-POU domain containing, octamer-binding	Uniprot_Gallus-gallus(chicken)_Rev+Unrev51565sequences_Jan2024	47				0.3621	0.141	-0.2211	0.24224	0.594709	0.0452986	0.19909	0.340774	0.0684968	19.78	19.8	19.96	20.02	19.91	19.76	19.91	19.61	19.65	19.41	20.24	20.3	20.31	20.14	18.6	19.79	19.71	16208345	898886	912772	1021528	1.06094e+06	984898	887438	981934	801139	820206	695126	1.23846e+06	1.29517e+06	1295982	1.15296e+06
A0A8V0Z4V3;Q5ZII1	A0A8V0Z4V3_CHICK;Q5ZII1_CHICK	RPL4;RCJMB04_25p23	Ribosomal protein L4;Large ribosomal subunit protein uL4 C-terminal domain-containing protein	Uniprot_Gallus-gallus(chicken)_Rev+Unrev51565sequences_Jan2024	37	;cytosolic large ribosomal subunit	;	;structural constituent of ribosome	-1.1746	-0.7131	0.4614	4.86242e-05	0.00174814	0.00379133	0.00221162	0.0116996	0.0172321	20.04	19.69	19.65	19.89	20.02	20.37	20.12	20.24	20.31	20.57	19.04	19.34	19.53	19.1	18.6	19.81	19.81	16128697	1080756	848242	821276	969936	1.06343e+06	1.35925e+06	1.13748e+06	1.23939e+06	1298369	1.55221e+06	540523	662317	754978	563286
A0A8V0X980	A0A8V0X980_CHICK	CALR	Calreticulin	Uniprot_Gallus-gallus(chicken)_Rev+Unrev51565sequences_Jan2024	37				1.2802	1.7848	0.5046	0.390931	0.310366	0.0277484	0.267657	0.23319	0.0505567	19	18.69	18.99	18.67	19.15	19.53	19.27	19.45	18.95	19.76	19.34	19.23	19.27	19.49	22.48	19.6	19.65	16114773	525025	423980	522240	417088	583123	758974	633184	717633	507396	889261	663883	616606	633263	734064
A0A8V0YD10	A0A8V0YD10_CHICK	PABPC1	Polyadenylate-binding protein	Uniprot_Gallus-gallus(chicken)_Rev+Unrev51565sequences_Jan2024	46				0.7273	0.3369	-0.3903	0.0934593	0.319319	0.0092466	0.108383	0.237344	0.026871	19.92	19.82	19.53	20	19.89	19.56	19.64	19.48	19.4	19.12	19.73	19.85	19.98	19.99	20.96	19.72	19.74	15944830	991588	926776	757452	1.04883e+06	969422	774370	815388	729824	690351	571388	870167	942850	1.03761e+06	1.04364e+06
A0A8V0ZNU5	A0A8V0ZNU5_CHICK	RPL23	Large ribosomal subunit protein uL14	Uniprot_Gallus-gallus(chicken)_Rev+Unrev51565sequences_Jan2024	2				-1.8982	-0.9662	0.9319	0.00173023	0.064556	0.0163967	0.0116272	0.085736	0.0369513	19.44	19.15	18.96	20.3	20.21	20.73	20.47	20.26	20.41	21.18	18.93	18.82	19.54	17.78	17.96	17.77	19.74	15825501	711272	583096	511282	1.28827e+06	1.21293e+06	1739373	1.45701e+06	1.25833e+06	1.39289e+06	2369187	499737	461252	763603	224564
Q3SX28	TREMBL:Q3SX28;Q5KR48		(Bos taurus) Tropomyosin 2	contaminants_mq1,6_headersForSpectronaut	6				1.9828	1.4126	-0.5702	0.102274	0.15266	0.0451428	0.114996	0.148724	0.0683751	19.58	19.03	18.93	19.64	19.36	18.74	19.28	18.13	18.3	19.05	19.96	20.32	19.55	20.52	22	19.42	19.38	15722096	781385	536855	499703	816367	672909	439055	635173	287051	323249	542976	1.021e+06	1.30604e+06	766178	1.50861e+06
Q5ZMF6	Q5ZMF6_CHICK	RCJMB04_2d7	Histidine kinase/HSP90-like ATPase domain-containing protein	Uniprot_Gallus-gallus(chicken)_Rev+Unrev51565sequences_Jan2024	35	nucleoplasm,mitochondrial inner membrane,mitochondrial matrix	protein folding,response to stress,translational attenuation,negative regulation of cellular respiration	ATP binding,protein kinase binding,unfolded protein binding	-1.9332	-1.218	0.7152	0.0167167	0.00553243	0.117898	0.0374035	0.020617	0.125911	20.26	19.79	19.61	19.84	19.26	20.24	20.12	21.34	20.09	20.33	18.49	19.1	19.13	18.52	16.21	19.79	19.71	15712301	1.25824e+06	909240	802435	941454	629534	1.23487e+06	1.13759e+06	2.64658e+06	1.11919e+06	1.31667e+06	367942	560024	572649	375831
Q6S7R6	Q6S7R6_CHICK		Troponin I, cardiac muscle	Uniprot_Gallus-gallus(chicken)_Rev+Unrev51565sequences_Jan2024	27				-0.0052	-0.1613	-0.1561	0.989783	0.627693	0.581595	0.468015	0.352416	0.336736	20.08	19.68	19.69	20.28	19.83	19.11	20.31	19.55	19.24	20.23	19.36	19.44	19.43	19.48	20.65	19.69	19.74	15671270	1.1074e+06	839575	847722	1.27029e+06	931226	565222	1.30258e+06	765838	617336	1.23278e+06	675088	709642	706840	729593
A0A8V0XPN5;A0A8V0XX90	A0A8V0XPN5_CHICK;A0A8V0XX90_CHICK	RPS23	Small ribosomal subunit protein uS12	Uniprot_Gallus-gallus(chicken)_Rev+Unrev51565sequences_Jan2024	12	;	;	;	-0.5012	-0.2809	0.2203	0.0117407	0.0153402	0.133225	0.0305146	0.0355226	0.136186	19.91	19.74	19.66	20.01	19.96	20.03	19.94	19.88	20.06	20.43	19.45	19.51	19.61	19.52	19.78	19.42	19.45	15649663	986221	875475	829272	1.05394e+06	1.01836e+06	1.0711e+06	1.0035e+06	965173	1.09281e+06	1.41651e+06	716982	747047	800498	753403
A0A8V0ZQJ3;P47826	A0A8V0ZQJ3_CHICK;RLA0_CHICK	RPLP0	Large ribosomal subunit protein uL10	Uniprot_Gallus-gallus(chicken)_Rev+Unrev51565sequences_Jan2024	19	;nucleus,endoplasmic reticulum,cytosolic large ribosomal subunit,dendrite,cytoplasmic ribonucleoprotein granule	;ribosome biogenesis,cellular response to interleukin-4,cytoplasmic translation	;structural constituent of ribosome	0.5192	0.0975	-0.4217	0.0336908	0.589497	0.0239261	0.057124	0.339155	0.046346	20.07	19.8	19.57	20.05	20.1	19.52	19.75	19.66	19.51	18.99	20.04	20.25	20.24	20.07	19.37	19.43	19.58	15561246	1.10021e+06	913019	775793	1.08473e+06	1.12249e+06	753253	883000	825795	745800	521960	1.07919e+06	1250861	1.23901e+06	1.0973e+06
A0A8V1A027;A0A8V1A4F3;Q5ZM66	A0A8V1A027_CHICK;A0A8V1A4F3_CHICK;Q5ZM66_CHICK	RPS26;RPS26;RCJMB04_2p17	40S ribosomal protein S26	Uniprot_Gallus-gallus(chicken)_Rev+Unrev51565sequences_Jan2024	9	;;	;;	;;	-0.7632	-0.5103	0.2529	0.00409173	0.0312327	0.146784	0.0177893	0.0545091	0.144824	19.96	19.66	19.48	20.02	20.1	20.1	20.12	19.89	19.92	20.47	19.18	19.58	19.68	19.49	18.59	19.5	19.62	15350688	1.01825e+06	829185	733568	1.06553e+06	1.12485e+06	1125578	1.141e+06	971238	994596	1.45322e+06	593989	781348	840612	738302
E1BT66	E1BT66_CHICK	TAF15	TATA-box binding protein associated factor 15	Uniprot_Gallus-gallus(chicken)_Rev+Unrev51565sequences_Jan2024	19	nucleoplasm,cytoplasm	regulation of transcription, DNA-templated	RNA binding,metal ion binding	0.5243	0.6845	0.1602	0.424278	0.325414	0.440442	0.280682	0.239818	0.286813	19.43	19.36	19.69	19.51	19.39	19.45	19.91	19.29	19.27	20.08	19.9	19.47	19.31	19.57	21.39	19.75	19.66	15331502	703956	672763	843989	746801	688781	716272	984823	640406	633156	1.11097e+06	975660	728220	649237	779116
Q8UVD9	FUBP2_CHICK	KHSRP	Far upstream element-binding protein 2	Uniprot_Gallus-gallus(chicken)_Rev+Unrev51565sequences_Jan2024	44	nucleus,cytoplasm	regulation of transcription, DNA-templated,intracellular mRNA localization,miRNA metabolic process,regulation of mRNA stability,negative regulation of nitric oxide biosynthetic process,mRNA transport,positive regulation of mRNA catabolic process,3'-UTR-mediated mRNA destabilization,cellular response to cytokine stimulus	mRNA 3'-UTR binding,mRNA 3'-UTR AU-rich region binding	0.7756	0.8429	0.0673	0.227516	0.203302	0.568061	0.191771	0.178896	0.331895	19.34	19.34	19.55	19.5	19.44	19.33	19.71	19.36	19.32	19.76	19.92	19.7	19.69	19.82	21.39	19.52	19.61	15202567	665322	665285	766712	743827	712671	657683	856493	671041	652818	885495	993734	852093	845877	927098
A0A8V1AAB0;Q98TF7	A0A8V1AAB0_CHICK;RL35_CHICK	RPL35	Large ribosomal subunit protein uL29	Uniprot_Gallus-gallus(chicken)_Rev+Unrev51565sequences_Jan2024	13	;cytosolic large ribosomal subunit	;maturation of LSU-rRNA from tricistronic rRNA transcript (SSU-rRNA, 5.8S rRNA, LSU-rRNA),translation	;mRNA binding,structural constituent of ribosome	1.3728	0.8639	-0.5089	0.133825	0.241241	0.0064225	0.136513	0.198606	0.0222113	19.58	19.14	19.63	19.72	19.61	18.92	19.27	19.12	18.96	18.9	19.72	19.67	19.89	20.07	21.62	19.52	19.62	15082942	785957	576177	811733	863759	800929	496877	630897	569603	511462	488719	864972	833876	968528	1.10285e+06
F1NJ37	F1NJ37_CHICK	MYL4	Myosin, light chain 4, alkali; atrial, embryonic	Uniprot_Gallus-gallus(chicken)_Rev+Unrev51565sequences_Jan2024	16			calcium ion binding	2.2861	0.1301	-2.156	0.163404	0.869996	0.0181586	0.155562	0.4321	0.0392468	20.45	19.51	18.8	20.66	20.55	17.68	17.82	17.56	18.2	18.5	18.9	19.26	19.54	19.71	21.8	19.37	19.47	14915853	1.43392e+06	748274	457110	1.65762e+06	1.53043e+06	209396	231391	193148	301856	371766	490103	628378	763065	854790
Q01841	TGM2_CHICK	TGM2	Protein-glutamine gamma-glutamyltransferase 2	Uniprot_Gallus-gallus(chicken)_Rev+Unrev51565sequences_Jan2024	55		peptide cross-linking	protein-glutamine gamma-glutamyltransferase activity,metal ion binding	0.76	0.4145	-0.3455	0.143089	0.337311	0.0559356	0.142387	0.245242	0.0783099	19.56	19.55	20.04	19.4	19.78	19.42	19.24	19.48	19.2	19.33	19.66	19.74	19.82	19.69	21.02	19.5	19.5	14617010	774307	765486	1.07891e+06	690637	900188	701880	620234	729901	602689	658351	830233	877307	924465	848117
R4GGJ0	R4GGJ0_CHICK	RPS16	Small ribosomal subunit protein uS9	Uniprot_Gallus-gallus(chicken)_Rev+Unrev51565sequences_Jan2024	21	cytosolic small ribosomal subunit,small ribosomal subunit	maturation of SSU-rRNA from tricistronic rRNA transcript (SSU-rRNA, 5.8S rRNA, LSU-rRNA),translation,cellular response to leukemia inhibitory factor	RNA binding,structural constituent of ribosome,poly(A) RNA binding	-1.0489	-0.7065	0.3424	0.00136934	0.00796688	0.0578905	0.0102731	0.0247656	0.0799481	19.99	19.68	19.64	19.78	19.79	20.07	20.11	19.91	19.94	20.51	19.15	19.36	19.36	19.18	17.9	19.55	19.58	14542654	1.04227e+06	841817	819321	902771	904282	1.10186e+06	1.13395e+06	983798	1.00251e+06	1.4965e+06	580962	672137	672730	593061
F6SU35	F6SU35_CHICK	RPL10A	Ribosomal protein	Uniprot_Gallus-gallus(chicken)_Rev+Unrev51565sequences_Jan2024	19	cytosolic large ribosomal subunit,polysomal ribosome	maturation of LSU-rRNA,cytoplasmic translation,translation	RNA binding,structural constituent of ribosome	1.3142	0.6417	-0.6726	0.0715641	0.219943	0.00185527	0.0914236	0.188016	0.0120515	19.8	19.55	19.34	19.78	19.67	19	19.16	19.11	19.1	18.31	19.65	19.91	19.95	19.96	21.26	19.52	19.43	14466373	914927	767664	662551	900629	835292	524650	584752	565323	561011	324694	825194	986453	1.01537e+06	1.02001e+06
E1BVT3	E1BVT3_CHICK	MDH2	Malate dehydrogenase	Uniprot_Gallus-gallus(chicken)_Rev+Unrev51565sequences_Jan2024	30	mitochondrial inner membrane,myelin sheath	carbohydrate metabolic process,tricarboxylic acid cycle,malate metabolic process,internal protein amino acid acetylation	L-malate dehydrogenase activity	0.1319	0.6172	0.4853	0.872437	0.515276	0.220604	0.432748	0.313477	0.188445	19.71	19.26	19.38	19.24	18.96	19.45	19.18	20.58	19.37	20.03	18.85	19.14	19.02	18.93	21.51	19.43	19.49	14431437	860016	629088	680534	620669	511411	717842	595595	1.56224e+06	677988	1.06828e+06	474084	577966	530841	500206
P30352	SRSF2_CHICK	SRSF2	Serine/arginine-rich splicing factor 2	Uniprot_Gallus-gallus(chicken)_Rev+Unrev51565sequences_Jan2024	11	nucleus	mRNA processing,RNA splicing,regulation of RNA splicing	RNA binding	0.7505	0.8407	0.0902	0.163133	0.13237	0.743587	0.155395	0.135692	0.391371	19.25	19.11	19.84	19.21	19.07	19.14	19.79	19	18.95	19.91	19.92	19.69	19.53	19.97	21.11	19.63	19.51	14228677	624294	564680	938656	607912	550907	578568	906509	522837	505052	985427	993159	848081	758215	1.02806e+06
F1N9I5	F1N9I5_CHICK	ELAVL1	ELAV-like protein	Uniprot_Gallus-gallus(chicken)_Rev+Unrev51565sequences_Jan2024	20	nucleoplasm,cytosol,ribonucleoprotein complex	negative regulation of gene silencing by miRNA,3'-UTR-mediated mRNA stabilization,regulation of stem cell population maintenance	double-stranded RNA binding,protein kinase binding,mRNA 3'-UTR AU-rich region binding,protein homodimerization activity	0.2796	0.2047	-0.0748	0.192738	0.306158	0.396458	0.172891	0.231289	0.269842	19.5	19.54	19.74	19.77	19.63	19.74	19.66	19.54	19.5	19.36	20.01	20.1	19.92	19.92	19.03	19.46	19.49	14127602	741967	759804	875869	893326	813781	872830	830822	760421	739363	674802	1058363	1.12467e+06	993552	994760
A0A8V0X5N3;Q5ZLP8	A0A8V0X5N3_CHICK;IF2B3_CHICK	IGF2BP3	Insulin like growth factor 2 mRNA binding protein 3;Insulin-like growth factor 2 mRNA-binding protein 3	Uniprot_Gallus-gallus(chicken)_Rev+Unrev51565sequences_Jan2024	44	;nucleus,cytoplasm	;regulation of translation,mRNA transport	;mRNA 3'-UTR binding	0.4203	0.2211	-0.1992	0.312694	0.547041	0.143196	0.234245	0.32455	0.142438	19.58	19.63	19.54	19.81	19.69	19.68	19.6	19.49	19.44	18.96	20.05	20.26	20.18	20.12	17.11	19.53	19.55	14055240	784770	810963	764545	919287	846350	839452	796536	736682	709908	511338	1.08727e+06	1.2545e+06	1.1856e+06	1.14038e+06
F1NZD3	F1NZD3_CHICK	RBMXL1	RNA binding motif protein, X-linked like 1	Uniprot_Gallus-gallus(chicken)_Rev+Unrev51565sequences_Jan2024	48			RNA binding	1.3177	0.7699	-0.5478	0.019764	0.0620629	0.00043203	0.0413823	0.0835038	0.00584532	19.55	19.39	19.43	19.56	19.37	19.04	19.14	18.89	18.79	18.64	20.01	20.05	19.84	20	20.94	19.61	19.47	13751194	765435	686495	706291	771524	677524	540340	578738	486702	453498	408364	1.05597e+06	1.08799e+06	937437	1.0521e+06
A0A8V0ZZT3	A0A8V0ZZT3_CHICK	HK1	hexokinase	Uniprot_Gallus-gallus(chicken)_Rev+Unrev51565sequences_Jan2024	73				1.315	0.5596	-0.7554	3.9327e-05	0.000524831	0.0011861	0.00202613	0.0064423	0.00957355	19.72	19.41	19.39	19.82	19.65	18.72	19.02	18.88	18.87	18.75	19.97	20.23	20.26	20.29	20.06	19.39	19.45	13652179	863092	696990	685564	924984	824571	432937	531431	482997	477922	441358	1.02977e+06	1230925	1.25557e+06	1.27882e+06
A0A8V0YR80;A0A8V0Z4Q7;Q98TF9	A0A8V0YR80_CHICK;A0A8V0Z4Q7_CHICK;Q98TF9_CHICK	RPL14	Large ribosomal subunit protein eL14;Large ribosomal subunit protein eL14;Large ribosomal subunit protein eL14 (Fragment)	Uniprot_Gallus-gallus(chicken)_Rev+Unrev51565sequences_Jan2024	8	;;	;;	;;	-0.8222	-0.8025	0.0197	0.000192901	0.0100768	0.906076	0.00417074	0.0281668	0.442966	19.89	19.64	19.34	20.21	19.97	19.94	19.69	19.75	19.8	20.08	18.78	19.18	19.24	18.9	19.04	19.53	19.49	13640766	969768	819014	664965	1.21458e+06	1.0285e+06	1.00904e+06	845003	883886	911944	1.1116e+06	450098	593146	620624	489808
Q5F346	Q5F346_CHICK	RCJMB04_34p20	Large ribosomal subunit protein eL28	Uniprot_Gallus-gallus(chicken)_Rev+Unrev51565sequences_Jan2024	17	ribosome,dendrite,cytoplasmic ribonucleoprotein granule,cell body	translation	structural constituent of ribosome	-1.3884	-0.9587	0.4297	0.00143347	0.00290574	0.0627493	0.0105075	0.0149787	0.0842004	19.81	19.56	19.33	19.8	19.83	19.99	19.97	19.81	20.06	20.58	18.65	18.77	19.37	18.68	17.63	19.55	19.6	13558198	919298	773084	659457	910449	930534	1.03903e+06	1.02587e+06	918126	1.09289e+06	1.57155e+06	411276	445963	677500	419718
A0A1D5PMT8	A0A1D5PMT8_CHICK	RPLP2	Large ribosomal subunit protein P2	Uniprot_Gallus-gallus(chicken)_Rev+Unrev51565sequences_Jan2024	13	ribosome	translational elongation	structural constituent of ribosome	1.0636	1.3799	0.3163	0.398602	0.32577	0.275928	0.27079	0.239992	0.216563	18.96	18.46	19.13	18.99	19.05	18.85	19.67	18.89	18.79	19.73	18.99	18.85	19.15	19.57	21.99	19.12	19.2	13304247	508192	361243	572399	519072	542099	472248	836857	484129	454605	868747	521925	473130	580156	777833
Q98TF8	RL22_CHICK	RPL22	Large ribosomal subunit protein eL22	Uniprot_Gallus-gallus(chicken)_Rev+Unrev51565sequences_Jan2024	11	cytosolic large ribosomal subunit	cytoplasmic translation	RNA binding,structural constituent of ribosome,poly(A) RNA binding	0.7338	0.4341	-0.2997	0.200491	0.37615	0.00693076	0.177349	0.261892	0.0231393	19.51	19.52	19.35	19.59	19.71	19.25	19.22	19.22	19.17	19.35	19.67	19.33	19.5	19.66	21	18.99	19.4	13292685	749142	751829	668116	790539	859101	625447	612173	608581	589453	666844	832514	659049	742650	826361
A0A8V1AG01	A0A8V1AG01_CHICK	HNRNPM	Heteroous nuclear ribonucleoprotein M	Uniprot_Gallus-gallus(chicken)_Rev+Unrev51565sequences_Jan2024	61				-0.1999	0.0227	0.2226	0.117822	0.851714	0.0205878	0.125885	0.426626	0.042321	19.43	19.34	19.51	19.61	19.63	19.62	19.78	19.71	19.61	19.9	19.46	19.53	19.55	19.2	19.83	19.35	19.44	13228312	703989	662091	745524	801060	809406	806885	903053	854791	802464	975815	719027	755921	769919	601831
A0A8V0Z985	A0A8V0Z985_CHICK	RPS2	Small ribosomal subunit protein uS5	Uniprot_Gallus-gallus(chicken)_Rev+Unrev51565sequences_Jan2024	24				-1.1411	-0.6157	0.5254	0.000903918	0.0353541	0.000387378	0.00837037	0.0586968	0.00562221	19.65	19.46	19.33	19.63	19.59	20.01	20.06	19.93	20.02	20.26	19	19.31	19.24	19	17.31	19.39	19.48	13179462	820900	721231	656777	813311	791138	1.05605e+06	1.09439e+06	998782	1.06638e+06	1.25876e+06	525804	649252	618553	525939
A0A8V0Y0F3	A0A8V0Y0F3_CHICK	EMILIN1	Elastin microfibril interfacer 1	Uniprot_Gallus-gallus(chicken)_Rev+Unrev51565sequences_Jan2024	44				-1.7532	-1.0459	0.7073	0.0034669	0.00505524	0.0402343	0.0164416	0.0197222	0.0636296	19.62	18.97	19.6	19.53	19.75	20.1	20.18	19.83	19.96	20.82	18.74	18.95	18.97	17.67	17.18	19.43	19.46	13109513	804470	511797	796623	755143	880145	1.12452e+06	1.19172e+06	932799	1.02126e+06	1.84966e+06	436446	508181	514533	207881
Q5F424	Q5F424_CHICK	CCT2	T-complex protein 1 subunit beta	Uniprot_Gallus-gallus(chicken)_Rev+Unrev51565sequences_Jan2024	45	chaperonin-containing T-complex	'de novo' protein folding	protein binding involved in protein folding,unfolded protein binding	-0.1219	-0.0168	0.1051	0.445793	0.913172	0.12063	0.288741	0.445216	0.127793	19.51	19.55	19.55	19.48	19.63	19.69	19.51	19.78	19.7	19.55	19.62	19.69	19.67	19.68	18.8	19.35	19.39	13063949	747955	766522	766337	730522	810970	843641	748053	901632	852634	765202	804602	845058	834126	839174
Q90593	BIP_CHICK	HSPA5	Endoplasmic reticulum chaperone BiP	Uniprot_Gallus-gallus(chicken)_Rev+Unrev51565sequences_Jan2024	55	endoplasmic reticulum lumen,nucleus,membrane,cytoplasm,endoplasmic reticulum chaperone complex	negative regulation of protein homodimerization activity,negative regulation of IRE1-mediated unfolded protein response,cellular response to heat,chaperone mediated protein folding requiring cofactor,response to unfolded protein,ER-associated ubiquitin-dependent protein catabolic process,cellular response to unfolded protein,protein refolding,endoplasmic reticulum unfolded protein response	protein binding,ATP binding,ATPase activity,heat shock protein binding,misfolded protein binding,unfolded protein binding,protein binding involved in protein folding,ATPase activity, coupled	1.4924	1.5455	0.0531	0.169149	0.162668	0.72642	0.159166	0.1551	0.385571	18.9	18.55	18.69	18.82	19.19	19.01	19	19	18.46	18.96	19.61	19.71	19.69	19.75	21.74	19.29	19.3	12973162	489624	384956	421598	462975	598809	529677	523910	523414	360626	508706	801824	859900	843714	883795
Q6ITC7	RS13_CHICK	RPS13	Small ribosomal subunit protein uS15	Uniprot_Gallus-gallus(chicken)_Rev+Unrev51565sequences_Jan2024	17	nucleolus,cytosolic small ribosomal subunit	translation,negative regulation of RNA splicing	structural constituent of ribosome,mRNA 5'-UTR binding,small ribosomal subunit rRNA binding	0.5032	-0.0026	-0.5058	0.004172	0.980477	0.00404059	0.0179596	0.465483	0.017685	19.63	19.62	19.51	19.9	19.83	19.19	19.57	19.1	18.95	19.12	19.48	19.85	19.62	19.66	19.87	19.19	19.42	12862016	810309	806575	748471	979247	933671	597263	778340	562393	505245	569737	732282	946697	806386	827033
A0A8V0YS56;E1BZS2	A0A8V0YS56_CHICK;E1BZS2_CHICK	NAP1L1	Nucleosome assembly protein 1 like 1	Uniprot_Gallus-gallus(chicken)_Rev+Unrev51565sequences_Jan2024	21	;nucleus	;nucleosome assembly	;	-0.4799	-0.2103	0.2696	0.000468335	0.0347838	0.00357999	0.0060897	0.0581084	0.0167037	19.45	19.5	19.66	19.33	19.53	19.81	19.77	19.74	19.74	19.78	19.44	19.17	19.44	19.18	19.19	19.42	19.49	12817191	717942	743911	828403	659433	757120	921911	895094	874018	874748	902661	710629	591293	710628	593692
A0A8V0ZQM4	A0A8V0ZQM4_CHICK	HNRNPA1	Heteroous nuclear ribonucleoprotein A1	Uniprot_Gallus-gallus(chicken)_Rev+Unrev51565sequences_Jan2024	38				1.0078	0.8123	-0.1955	0.0358041	0.0573158	0.0749206	0.0591225	0.0794492	0.094	19.19	19.14	19.2	19.4	19.32	19.3	19.16	18.96	18.98	18.84	19.87	19.9	19.76	19.7	20.78	19.38	19.29	12646174	597648	577028	602857	690180	653249	647556	583817	508965	515968	469052	957944	978912	887049	850518
A0A3Q2U825	A0A3Q2U825_CHICK	RPS28	Small ribosomal subunit protein eS28	Uniprot_Gallus-gallus(chicken)_Rev+Unrev51565sequences_Jan2024	9				-0.5157	0.2468	0.7625	0.498859	0.786055	0.0769159	0.307679	0.405833	0.0955264	19.3	18.77	19.25	19.13	19.23	19.65	19.81	19.54	19.54	20.66	18.42	18.14	18.31	18.22	21.05	19.37	19.24	12576166	647210	446428	621505	573550	615844	820360	919697	762107	763134	1.66205e+06	350213	288494	324318	305850
A0A8V0Y814	A0A8V0Y814_CHICK	CCT8	T-complex protein 1 subunit theta	Uniprot_Gallus-gallus(chicken)_Rev+Unrev51565sequences_Jan2024	51				-0.0767	-0.078	-0.0013	0.648493	0.618223	0.989458	0.35945	0.34911	0.467938	19.44	19.56	19.49	19.47	19.7	19.61	19.46	19.66	19.67	19.23	19.5	19.59	19.69	19.57	18.76	19.29	19.34	12494461	708842	775620	736895	727192	849042	797994	721726	827380	833780	613392	741360	787013	846105	779688
A3RKL2;P12902	A3RKL2_CHICK;HM14A_CHICK		Nonhistone chromosomal protein HMG-14A;Non-histone chromosomal protein HMG-14A	Uniprot_Gallus-gallus(chicken)_Rev+Unrev51565sequences_Jan2024	9	;chromatin,nucleus	;	;nucleosomal DNA binding	0.6859	1.3759	0.6899	0.49433	0.287689	0.0145521	0.305915	0.222139	0.0344532	18.69	18.78	18.79	18.73	18.54	19.03	19.57	19.11	19.39	19.75	19.1	18.89	18.63	19.56	21.66	19.27	19.4	12454190	422060	449366	452201	433333	379962	534052	778264	565123	687008	882862	563392	484865	405605	770597
A0A1D5P3B1	A0A1D5P3B1_CHICK	RPL11	Large ribosomal subunit protein uL5	Uniprot_Gallus-gallus(chicken)_Rev+Unrev51565sequences_Jan2024	18				-0.0396	-0.0266	0.013	0.909282	0.939674	0.889051	0.444016	0.453271	0.437645	19.35	19.32	19.53	19.64	19.66	19.68	19.56	19.44	19.34	19.54	19.67	19.73	19.88	19.79	16.17	19.29	19.29	12408271	668913	652682	754523	816094	827041	841385	774088	712992	664729	759814	835269	869545	963055	909624
F1NPA9	F1NPA9_CHICK	RPS3	DNA-(apurinic or apyrimidinic site) lyase	Uniprot_Gallus-gallus(chicken)_Rev+Unrev51565sequences_Jan2024	30	cytosolic small ribosomal subunit,nucleus	positive regulation of apoptotic signaling pathway,positive regulation of DNA repair,DNA repair	oxidized purine DNA binding,DNA-(apurinic or apyrimidinic site) lyase activity,structural constituent of ribosome,oxidized purine nucleobase lesion DNA N-glycosylase activity,damaged DNA binding	-1.8048	-1.1147	0.6901	1.14719e-05	0.00160891	0.000885552	0.00123685	0.011167	0.00829952	19.6	19.37	19.31	19.47	19.51	20.2	19.98	20.05	20.07	20.39	18.5	18.66	18.72	18.4	16.56	19.31	19.34	12366558	795270	676380	651748	725229	745652	1207617	1.0333e+06	1.08201e+06	1099920	1.37599e+06	371253	414262	432215	345395
A0A182C6I3;A0A1D5PR40	A0A182C6I3_CHICK;A0A1D5PR40_CHICK	;LOC107049046	Large ribosomal subunit protein uL22	Uniprot_Gallus-gallus(chicken)_Rev+Unrev51565sequences_Jan2024	17	;	;	;	-0.5703	-0.3229	0.2474	0.00319705	0.019774	0.0732679	0.0157482	0.0413889	0.0926336	19.57	19.24	19.37	19.52	19.66	19.64	19.64	19.55	19.71	20.04	18.93	19.04	19.36	19.07	19.33	19.33	19.37	12249896	778494	619035	678872	751492	826532	816982	819422	768674	858335	1.07454e+06	499014	540571	674338	550202
A0A8V0ZVR6	A0A8V0ZVR6_CHICK	SERBP1	SERPINE1 mRNA binding protein 1	Uniprot_Gallus-gallus(chicken)_Rev+Unrev51565sequences_Jan2024	44				0.4411	0.6596	0.2185	0.604918	0.477228	0.144362	0.34439	0.30032	0.143218	19.11	19.12	19.42	19.04	19.03	19.37	19.5	19.13	19.12	19.65	18.93	18.89	18.65	19.11	21.33	19.25	19.34	12180729	565154	568564	700884	538030	537061	677674	743370	572426	570082	821963	499645	485027	410455	564778
P51903	PGK_CHICK	PGK	Phosphoglycerate kinase	Uniprot_Gallus-gallus(chicken)_Rev+Unrev51565sequences_Jan2024	48	cell,chromosome,cytosol	gluconeogenesis,glycolytic process,phosphorylation	phosphoglycerate kinase activity,ATP binding	0.4545	1.2048	0.7503	0.749653	0.512933	0.0131906	0.393503	0.312641	0.0325158	18.51	18.83	19.25	18.01	18.86	19.54	18.81	19.58	19.72	19.67	18.08	17.42	17.53	17.74	22.01	19.17	19.21	12170905	373020	465145	624015	263459	475021	761983	460062	782408	861218	836141	277915	175217	189016	218562
E1BTG1	E1BTG1_CHICK	RPL12	Large ribosomal subunit protein uL11	Uniprot_Gallus-gallus(chicken)_Rev+Unrev51565sequences_Jan2024	12	cytosolic large ribosomal subunit,ribosome	ribosomal large subunit assembly,translation	structural constituent of ribosome,rRNA binding	0.9187	0.4608	-0.4579	0.000411431	0.00706449	0.00757728	0.00572448	0.0233395	0.0241146	19.5	19.23	19.13	19.5	19.6	18.8	19.23	18.93	18.78	18.93	19.67	19.8	19.81	19.83	20.16	19.2	19.28	11979887	739299	613515	573416	740997	792898	455912	615450	498327	451516	498000	832745	911575	919556	929655
A0A8V0YGA1	A0A8V0YGA1_CHICK	HNRNPR	Heteroous nuclear ribonucleoprotein R	Uniprot_Gallus-gallus(chicken)_Rev+Unrev51565sequences_Jan2024	45				0.6172	0.2942	-0.323	0.0714965	0.272508	0.00922397	0.091389	0.21488	0.0268485	19.41	19.28	19.56	19.5	19.31	19.27	19.21	19.09	19.07	18.78	19.94	19.84	19.9	19.92	18.48	19.29	19.29	11857081	695051	638452	770299	741565	648361	633081	604620	557465	549050	448734	1.00821e+06	939864	980241	989811
A0A8V0XUD0	A0A8V0XUD0_CHICK	EEF1D	Elongation factor 1-delta	Uniprot_Gallus-gallus(chicken)_Rev+Unrev51565sequences_Jan2024	24				0.5989	0.5861	-0.0128	0.432017	0.436944	0.929349	0.28369	0.285549	0.450097	19.39	19.15	19.15	19.17	19.22	18.97	19.22	19.08	19.03	19.63	19.02	19.17	19.05	19.15	21.15	19.15	19.16	11827786	688298	582541	581936	589209	609851	512799	612715	554531	534218	810710	533096	591480	542044	582154
A0A8V0ZCJ0;P62149	A0A8V0ZCJ0_CHICK;CALM_CHICK	CALM2;CALM	Calmodulin 2;Calmodulin	Uniprot_Gallus-gallus(chicken)_Rev+Unrev51565sequences_Jan2024	14	;spindle pole,centrosome,spindle microtubule,voltage-gated potassium channel complex,sarcomere,macromolecular complex,calcium channel complex,myelin sheath,catalytic complex	;G2/M transition of mitotic cell cycle,regulation of heart rate,detection of calcium ion,regulation of release of sequestered calcium ion into cytosol by sarcoplasmic reticulum,positive regulation of cAMP biosynthetic process,regulation of cytokinesis,positive regulation of phosphoprotein phosphatase activity,positive regulation of DNA binding,positive regulation of cyclic-nucleotide phosphodiest…	;calcium ion binding,protein C-terminus binding,adenylate cyclase binding,myosin binding,calcium channel inhibitor activity,protein kinase binding,titin binding,N-terminal myristoylation domain binding,ion channel binding,CH domain binding,protein phosphatase activator activity,disordered domain specific binding	1.7125	2.8313	1.1188	0.468052	0.377263	0.0728947	0.297096	0.262333	0.0923659	17.36	17.34	18.52	17.11	17.45	18.37	18.51	18.36	18.39	19.69	17.49	16.88	17.45	18.22	22.64	18.99	18.97	11640019	168458	165417	376899	141022	179049	339947	373655	335331	343073	846654	183979	120728	178635	304580
Q08200	RL10_CHICK	RPL10	Large ribosomal subunit protein uL16 (Fragment)	Uniprot_Gallus-gallus(chicken)_Rev+Unrev51565sequences_Jan2024	15	nucleus,cytosolic large ribosomal subunit	ribosomal large subunit assembly,translation,regulation of translation,embryonic brain development	RNA binding,structural constituent of ribosome,translation regulator activity	-2.5609	-1.3198	1.2411	0.00146992	0.0010046	0.00673704	0.010655	0.00878943	0.022819	19.19	18.76	18.88	18.95	19.41	20.14	20.17	19.97	20.19	20.86	17.71	18.09	18.45	17.18	16.55	19.41	19.31	11630737	597321	444422	483733	507737	699014	1153698	1.1776e+06	1.03009e+06	1197201	1.89998e+06	214910	278171	357305	148448
A0A8V0ZL98	A0A8V0ZL98_CHICK	RPL27A	Large ribosomal subunit protein uL15	Uniprot_Gallus-gallus(chicken)_Rev+Unrev51565sequences_Jan2024	7				-1.8617	-0.9706	0.8911	6.92576e-05	0.000880989	0.000778115	0.00261494	0.00828259	0.0078167	19.35	19.05	18.97	19.24	19.52	20.01	20.19	19.9	20.05	20.44	18.2	18.22	18.77	17.6	18.32	19.11	19.33	11629205	668735	540994	512250	619642	750614	1.0565e+06	1.19245e+06	978119	1.088e+06	1.41965e+06	300480	305631	447407	198236
A0A8V0ZUU8	A0A8V0ZUU8_CHICK	TTN	Titin	Uniprot_Gallus-gallus(chicken)_Rev+Unrev51565sequences_Jan2024	2409				-0.9762	-1.2446	-0.2685	0.00188203	0.00149211	0.182076	0.0121203	0.0107385	0.166671	19.97	19.66	19.26	20.05	19.96	19.29	19.57	19.36	19.44	19.93	18.33	18.71	18.82	18.8	17.98	19.29	19.3	11622533	1.02444e+06	826658	629856	1.08625e+06	1.02265e+06	640877	780978	674538	712392	1.00171e+06	329119	429193	463441	456905
A0A8V0X7I3	A0A8V0X7I3_CHICK	HNRNPC	RRM domain-containing protein	Uniprot_Gallus-gallus(chicken)_Rev+Unrev51565sequences_Jan2024	8				1.082	0.5786	-0.5034	1.54642e-05	0.000489338	0.00760423	0.00135364	0.00617888	0.0241408	19.3	19.14	19.08	19.53	19.47	18.94	19.12	18.79	18.66	18.45	19.95	19.94	19.85	20.03	19.66	19.1	19.3	11617634	644651	576634	554026	756223	723904	502701	571534	452054	413026	357187	1.01085e+06	1.00589e+06	942315	1.07203e+06
Q90WF0	Q90WF0_CHICK		CgABP260	Uniprot_Gallus-gallus(chicken)_Rev+Unrev51565sequences_Jan2024	156				-1.2192	-0.596	0.6231	0.00934248	0.0080254	0.0549601	0.0270278	0.0248583	0.0774735	19.42	19.2	19.09	19.32	19.4	19.57	19.85	19.5	19.95	20.49	18.61	18.9	18.95	18.89	17.87	19.24	19.26	11523525	703101	603757	557255	653480	690993	775862	944252	741494	1.01153e+06	1.46879e+06	401388	488225	505645	487484
A0A1D5PX32;A0A8V0YZR3;A0A8V0Z142	A0A1D5PX32_CHICK;A0A8V0YZR3_CHICK;A0A8V0Z142_CHICK	SRSF7	SRSF7 factor;SRSF7 factor;Serine/arginine-rich splicing factor 7	Uniprot_Gallus-gallus(chicken)_Rev+Unrev51565sequences_Jan2024	15	;;	;;	RNA binding,zinc ion binding;;	0.8808	0.7509	-0.1298	0.00370892	0.00887434	0.484687	0.0170567	0.0263305	0.30269	19.12	18.98	19.24	19.19	19.12	18.86	19.34	18.75	18.48	19.38	19.8	19.85	19.63	19.74	20.31	19.14	19.19	11520475	570062	518216	619868	599241	568694	475702	665378	439718	366342	681454	914378	943983	810647	874385
Q789A6	Q789A6_CHICK		Nonmuscle myosin heavy chain	Uniprot_Gallus-gallus(chicken)_Rev+Unrev51565sequences_Jan2024	146				1.7069	0.5868	-1.1201	0.00622569	0.0817865	0.0200246	0.0218365	0.0995594	0.0416943	19.66	18.98	18.58	19.81	19.67	18.14	18.38	18.08	18.53	18.3	19.56	19.77	19.87	19.99	20.59	19.13	19.12	11483293	826438	517837	393145	920327	832659	289242	340086	276567	377484	322447	771480	893290	955786	1.03964e+06
A0A8V0XWE1	A0A8V0XWE1_CHICK	GDI1	Rab GDP dissociation inhibitor	Uniprot_Gallus-gallus(chicken)_Rev+Unrev51565sequences_Jan2024	50				0.6804	1.4379	0.7574	0.626795	0.426764	0.00846288	0.352165	0.281594	0.0256507	18.3	18.71	18.88	18.08	18.62	19.48	18.84	19.43	19.59	19.04	18.47	18.01	18.02	18.19	21.93	19.08	19.12	11469908	323768	428102	482960	277751	403418	731182	470021	708783	790524	538481	363258	263160	265633	298954
A0A8V0X163	A0A8V0X163_CHICK	PFN2	Profilin	Uniprot_Gallus-gallus(chicken)_Rev+Unrev51565sequences_Jan2024	11				-0.1947	0.2349	0.4295	0.572156	0.560645	0.00259031	0.333337	0.329258	0.0142101	18.97	19.28	19.36	18.87	19.19	19.63	19.37	19.64	19.62	19.58	19.29	18.81	18.94	18.93	20.31	19.3	19.21	11454369	512638	634514	670665	478596	598883	814127	678064	818310	807538	781267	642570	458857	502767	498854
A0A8V0XBZ1	A0A8V0XBZ1_CHICK	TRIM55	Tripartite motif containing 55	Uniprot_Gallus-gallus(chicken)_Rev+Unrev51565sequences_Jan2024	44				-1.6813	-1.1514	0.5299	0.000861076	0.0028609	0.0377936	0.00815918	0.0148968	0.0611434	19.51	19.29	19.21	19.57	19.46	19.9	19.79	19.67	19.8	20.43	18.34	18.71	18.68	18.39	15.56	19.24	19.33	11384472	747817	639200	608102	775955	720372	978057	904902	832742	912345	1.413e+06	332494	427545	420928	342629
A0A8V0X8H2;A0A8V0X8N7	A0A8V0X8H2_CHICK;A0A8V0X8N7_CHICK		Eukaryotic translation elongation factor 1 gamma	Uniprot_Gallus-gallus(chicken)_Rev+Unrev51565sequences_Jan2024	37	;	;	;	-0.1014	-0.3335	-0.2321	0.685986	0.161834	0.0854902	0.372031	0.154532	0.102375	19.53	19.7	19.49	19.49	19.5	19.34	19.3	19.47	19.52	18.84	19.36	19.4	19.39	19.49	17.89	19.24	19.22	11334558	757317	851615	735051	736032	739897	664430	643890	726011	749950	467888	672441	692662	687903	735844
A0A8V0ZVA0;A0A8V0ZVA4	A0A8V0ZVA0_CHICK;A0A8V0ZVA4_CHICK	SOGA1	Suppressor of glucose, autophagy associated 1;Suppressor of glucose, autophagy associated 1	Uniprot_Gallus-gallus(chicken)_Rev+Unrev51565sequences_Jan2024	21	;	;	;	-0.2814	-0.114	0.1673	0.230604	0.464711	0.475387	0.193263	0.295862	0.299626	19.5	19.29	18.9	19.67	19.29	19.32	19.25	19.2	19.57	20.07	19.09	19.36	19.39	19.03	19.28	19.24	18.98	11326564	740223	641942	487714	833714	641338	654501	622329	602770	776593	1.10014e+06	557113	674498	685276	537057
A0A8V1A137;A0A8V1A673	A0A8V1A137_CHICK;A0A8V1A673_CHICK	XIRP1	Xin actin binding repeat containing 1	Uniprot_Gallus-gallus(chicken)_Rev+Unrev51565sequences_Jan2024	229	;	;	;	-2.3535	-0.5079	1.8455	0.00452292	0.0300673	0.00716492	0.0186417	0.0531699	0.0235162	18.75	18.32	18.29	18.62	18.56	20.05	20.59	19.62	20.35	20.88	17.58	17.85	17.85	17.96	18.59	19.33	19.32	11249057	440336	326466	319660	402277	386847	1089098	1.58309e+06	803049	1.33502e+06	1.9303e+06	196265	236116	236693	255590
A0A8V0XFL4;Q5ZI72	A0A8V0XFL4_CHICK;HNRDL_CHICK	HNRNPDL	Heteroous nuclear ribonucleoprotein D like;Heterogeneous nuclear ribonucleoprotein D-like	Uniprot_Gallus-gallus(chicken)_Rev+Unrev51565sequences_Jan2024	26	;nucleus,cytoplasm	;transcription, DNA-templated,regulation of transcription, DNA-templated	;DNA binding,RNA binding	1.1877	1.1883	0.0006	0.0941057	0.0942626	0.996349	0.108884	0.108986	0.469913	18.9	18.64	18.9	18.97	18.78	18.76	19.1	18.72	18.46	19.07	19.72	19.5	19.51	19.68	21.05	19.06	19.16	11193695	490383	409483	487702	513971	449190	442957	563858	432222	361475	551232	862832	741679	745345	838651
P11722	FINC_CHICK	FN1	Fibronectin	Uniprot_Gallus-gallus(chicken)_Rev+Unrev51565sequences_Jan2024	129	proteinaceous extracellular matrix,extracellular matrix	acute-phase response,cell adhesion,regulation of cell shape,cell migration	heparin binding	-0.1389	0.5176	0.6564	0.105098	0.0025187	0.000483644	0.117164	0.0140518	0.00615459	19.02	18.69	18.58	19.19	18.93	19.65	19.61	19.44	19.36	19.69	19.34	19.48	19.35	19.51	19.4	19.22	19.21	11011807	531339	422939	392702	597409	499956	820719	802416	711258	674070	844261	661874	731244	669723	746005
A0A8V0Z1Z1;Q9PTD6	A0A8V0Z1Z1_CHICK;Q9PTD6_CHICK	RPS6;	Small ribosomal subunit protein eS6;Small ribosomal subunit protein eS6 (Fragment)	Uniprot_Gallus-gallus(chicken)_Rev+Unrev51565sequences_Jan2024	2	;	;	;	-0.7276	-1.2111	-0.4835	0.000171788	0.00538668	0.0613785	0.00394573	0.0203659	0.0829357	20.28	19.59	19.44	19.81	19.59	19.3	19.06	19.32	19.38	19.37	18.71	18.74	18.7	18.43	18.14	19.61	19.18	11009847	1.27305e+06	789120	713423	917614	787045	644237	548267	652340	682106	677516	429512	437741	426700	352269
Q8JG64	PDIA3_CHICK	PDIA3	Protein disulfide-isomerase A3	Uniprot_Gallus-gallus(chicken)_Rev+Unrev51565sequences_Jan2024	62	extracellular space,endoplasmic reticulum,endoplasmic reticulum lumen,cell surface,melanosome,myelin sheath	protein folding,response to endoplasmic reticulum stress,cell redox homeostasis,oxidation-reduction process,positive regulation of extrinsic apoptotic signaling pathway	protein disulfide isomerase activity,peptide disulfide oxidoreductase activity,identical protein binding	1.2772	1.7205	0.4434	0.419617	0.346464	0.0130584	0.278952	0.24917	0.032327	18.39	18.27	18.5	18.21	18.68	18.99	18.67	18.93	18.57	19.09	18.71	18.45	18.57	18.72	22	19.01	19.02	10989245	343880	316701	371839	304194	419161	521413	416624	500744	390242	558433	428867	356983	388593	431050
F1N8H6;Q5ZM33	F1N8H6_CHICK;HP1B3_CHICK	HP1BP3	Heterochromatin protein 1-binding protein 3	Uniprot_Gallus-gallus(chicken)_Rev+Unrev51565sequences_Jan2024	47	nucleosome,nuclear speck;nucleosome,nucleus	nucleosome assembly,regulation of transcription, DNA-templated,regulation of cell proliferation,heterochromatin organization,cellular response to hypoxia,regulation of nucleus size;nucleosome assembly,regulation of transcription, DNA-templated,heterochromatin organization	DNA binding,nucleosome binding;DNA binding,chromatin binding	1.1648	0.6115	-0.5532	4.6956e-06	0.000135784	0.00153144	0.000810748	0.00353606	0.0108807	19.2	19.13	19.34	19.35	18.96	18.6	18.85	18.81	18.68	18.26	19.88	19.91	19.83	19.85	19.59	19.22	19.17	10904612	604262	574657	665403	668545	511118	396067	472434	459963	419304	313030	967878	985086	931304	947801
E1BVB1	E1BVB1_CHICK	RPL32	60S ribosomal protein L32	Uniprot_Gallus-gallus(chicken)_Rev+Unrev51565sequences_Jan2024	16	cytosolic large ribosomal subunit,polysomal ribosome	cytoplasmic translation	structural constituent of ribosome	0.3749	0.296	-0.079	0.242251	0.285295	0.720374	0.19909	0.220929	0.383564	19.16	19.09	18.98	19.45	19.37	18.94	19.13	18.85	18.82	19.75	19.22	19.32	19.48	19.14	20.17	18.95	19.2	10814200	586429	556666	518581	717157	679556	503578	572430	473093	464159	882220	609942	655264	731968	578850
Q5ZM92	Q5ZM92_CHICK	DAZAP1	DAZ associated protein 1	Uniprot_Gallus-gallus(chicken)_Rev+Unrev51565sequences_Jan2024	16				0.8996	0.6841	-0.2155	0.142168	0.212023	0.0315015	0.141806	0.183648	0.054833	19.11	19.07	19.25	19.06	18.94	18.7	19.08	18.88	18.75	18.92	19.33	19.42	19.29	19.35	20.78	19.15	18.98	10761343	565056	550175	621879	544807	504243	426555	553969	481681	440271	497050	658704	702019	641012	669815
P02565	MYH1B_CHICK	MYH1B	Myosin-1B	Uniprot_Gallus-gallus(chicken)_Rev+Unrev51565sequences_Jan2024	25	myofibril,myosin filament	microtubule-based movement	microtubule motor activity,calmodulin binding,ATP binding,microtubule binding,actin filament binding	4.7961	-1.1603	-5.9564	0.000106021	0.0457905	0.0071467	0.00315452	0.0689918	0.0234863	20.43	19.78	19.14	20.89	20.73	15.09	14.25	13.93	14.41	13.78	18.83	19.06	19.32	19.37	19.17	19.06	19.17	10745470	1.40832e+06	900843	576168	1.94619e+06	1735952	34932.3	19449	15560.5	21779.6	14046	466175	548063	656599	675800
A0A1L1S0X5;A0A8V0XI58	A0A1L1S0X5_CHICK;A0A8V0XI58_CHICK	RPL34	Large ribosomal subunit protein eL34	Uniprot_Gallus-gallus(chicken)_Rev+Unrev51565sequences_Jan2024	7	ribosome;	translation;	structural constituent of ribosome;	-0.8563	-0.5921	0.2642	0.000146516	0.00526122	0.0381981	0.00365924	0.0200954	0.0615732	19.46	19.21	19	19.51	19.52	19.65	19.62	19.56	19.53	19.71	18.63	18.85	19.13	18.61	18.49	19.13	19.07	10716259	719881	604732	522916	747377	752789	824159	806145	774489	756747	858958	406066	472402	575095	400309
A0A8V1A110;A0A8V1A646;A0A8V1A8K2	A0A8V1A110_CHICK;A0A8V1A646_CHICK;A0A8V1A8K2_CHICK	TNNI1	Troponin I1, slow skeletal type;Troponin I1, slow skeletal type;Troponin I1, slow skeletal type	Uniprot_Gallus-gallus(chicken)_Rev+Unrev51565sequences_Jan2024	17	;;	;;	;;	0.9682	-0.0213	-0.9895	0.0641907	0.946252	0.00133409	0.0854675	0.455191	0.0101231	19.61	19.12	19.42	19.75	19.76	18.2	19.01	18.41	18.05	18.88	19.07	19.14	19.39	19.27	20.35	19.08	19.07	10667750	798452	570684	703271	879525	890110	301877	528574	349497	272188	482932	552117	575777	686059	632755
A0A182C6H1;Q5ZMU9	A0A182C6H1_CHICK;Q5ZMU9_CHICK	;VCP	Transitional endoplasmic reticulum ATPase	Uniprot_Gallus-gallus(chicken)_Rev+Unrev51565sequences_Jan2024	87	;	;	;	0.1243	-0.0146	-0.1389	0.24602	0.808823	0.182264	0.201244	0.413307	0.16676	19.2	19.4	19.36	19.32	19.35	19.28	19.15	19.3	19.33	18.82	19.31	19.33	19.38	19.41	19.13	19.06	19.15	10664592	601972	694150	673784	652930	667458	636084	582343	647268	660184	462385	650152	657143	682697	694914
A0A1L1RQ91	A0A1L1RQ91_CHICK	GPI	Glucose-6-phosphate isomerase	Uniprot_Gallus-gallus(chicken)_Rev+Unrev51565sequences_Jan2024	44				0.3915	0.6576	0.2662	0.762802	0.644493	0.256955	0.397826	0.357954	0.206876	18.76	19.15	19.33	18.35	18.95	19.35	18.55	19.37	19.5	19.14	18.05	17.43	17.63	17.64	21.58	19.02	19	10617897	445409	582401	661163	333147	507823	667194	382605	676415	739962	576383	271662	176816	202374	204199
A0A8V0XTL6	A0A8V0XTL6_CHICK	MATR3	Matrin 3	Uniprot_Gallus-gallus(chicken)_Rev+Unrev51565sequences_Jan2024	73				0.2483	-0.011	-0.2593	0.376882	0.963459	0.0890429	0.262203	0.460349	0.105025	19.47	19.23	19.1	19.5	19.29	19.18	19.36	19.12	18.85	18.71	19.22	19.68	19.61	19.44	18.16	19.16	19.12	10437154	724089	614493	561048	742222	640293	593878	674499	571029	472633	430083	612285	839827	800374	712304
A0A8V1ABS2;A0A8V1AJ48;A0A8V1AL87	A0A8V1ABS2_CHICK;A0A8V1AJ48_CHICK;A0A8V1AL87_CHICK	CLTC	Clathrin heavy chain	Uniprot_Gallus-gallus(chicken)_Rev+Unrev51565sequences_Jan2024	114	;;	;;	;;	0.7466	0.0363	-0.7103	0.0240378	0.859605	0.00150256	0.04642	0.429114	0.0107801	19.56	19.34	19.08	19.61	19.5	18.85	18.9	18.87	18.71	18.18	19.43	19.66	19.68	19.7	18.59	19.07	19.03	10407440	775522	664412	554260	800528	740622	471091	487721	477765	427691	296497	705722	831216	842879	850549
A0A5H1ZRJ7;A0A8V0X994;P02467	A0A5H1ZRJ7_CHICK;A0A8V0X994_CHICK;CO1A2_CHICK	COL1A2	Collagen alpha-2(I) chain	Uniprot_Gallus-gallus(chicken)_Rev+Unrev51565sequences_Jan2024	29	;;fibrillar collagen trimer	;;	;;extracellular matrix structural constituent,metal ion binding	-0.066	0.3518	0.4178	0.904083	0.522494	0.444411	0.442294	0.316161	0.288135	18.62	18.78	19.91	18.16	18.78	18.98	19.34	18.73	18.78	20.39	20.1	19.74	19.47	18.79	16.8	19.03	19.07	10397066	403148	448764	985339	292592	448673	517679	664017	436285	450396	1.37632e+06	1.12376e+06	874021	724062	454564
A0A1D5PJY1	A0A1D5PJY1_CHICK	SPTBN1	Spectrin beta chain	Uniprot_Gallus-gallus(chicken)_Rev+Unrev51565sequences_Jan2024	230	spectrin	cytoskeleton organization,actin filament capping	actin binding,structural constituent of cytoskeleton,phospholipid binding	0.6557	0.0672	-0.5886	0.0132976	0.69268	0.00288464	0.0326502	0.374346	0.0149342	19.42	19.27	19.06	19.59	19.48	18.87	18.97	18.85	18.79	18.37	19.37	19.6	19.63	19.63	18.83	19.08	19.09	10338124	702846	631822	545207	787284	733574	479355	515051	474121	454264	338680	678999	793312	811717	812399
Q5F411	Q5F411_CHICK	CCT5	T-complex protein 1 subunit epsilon	Uniprot_Gallus-gallus(chicken)_Rev+Unrev51565sequences_Jan2024	44	zona pellucida receptor complex,nucleolus,centrosome,chaperonin-containing T-complex,microtubule,myelin sheath,cell body	'de novo' protein folding,binding of sperm to zona pellucida,response to virus,positive regulation of telomere maintenance via telomerase,protein stabilization,chaperone-mediated protein folding,toxin transport,positive regulation of establishment of protein localization to telomere,positive regulation of protein localization to Cajal body,positive regulation of telomerase RNA localization to Caj…	mRNA 3'-UTR binding,ATP binding,G-protein beta-subunit binding,protein binding involved in protein folding,mRNA 5'-UTR binding,beta-tubulin binding,unfolded protein binding	-0.0545	-0.044	0.0105	0.724014	0.772024	0.842282	0.384764	0.401278	0.423537	19.27	19.21	19.2	19.12	19.29	19.28	19.13	19.31	19.3	19.12	19.24	19.27	19.34	19.38	18.47	19.14	19.08	10219529	633446	606667	600991	571440	639862	635055	571848	649264	647072	571514	620756	632870	663239	680522
P18302	DREB_CHICK	DBN1	Drebrin	Uniprot_Gallus-gallus(chicken)_Rev+Unrev51565sequences_Jan2024	44	cell cortex,cell junction,growth cone	actin filament organization,nervous system development,cell differentiation	actin binding	0.4398	0.863	0.4232	0.04059	0.00575401	0.0034043	0.0639902	0.0209863	0.0163218	18.87	18.66	18.48	18.88	18.76	19.03	19.17	19.05	19.13	19.4	19.65	19.74	19.65	19.84	18.99	19.11	19.08	10210786	478394	415447	364610	483953	442482	535653	589789	541280	572784	690183	821265	873229	820504	937821
A0A8V0XWJ5	A0A8V0XWJ5_CHICK	YLPM1	YLP motif containing 1	Uniprot_Gallus-gallus(chicken)_Rev+Unrev51565sequences_Jan2024	75				0.6474	0.1442	-0.5032	0.0535306	0.522053	0.000126326	0.076248	0.316033	0.0034181	19.34	19.21	19.23	19.34	19.39	18.93	18.96	18.74	18.62	18.72	19.2	19.3	19.17	19.28	20.07	19.11	19	10179380	663905	607505	615989	661554	684769	500282	510298	437266	402039	431705	601947	645779	590894	637432
A0A8V1AC34;A0A8V1AEX8;A0A8V1AJ72;P05081	A0A8V1AC34_CHICK;A0A8V1AEX8_CHICK;A0A8V1AJ72_CHICK;KAD1_CHICK	AK1	Adenylate kinase isoenzyme 1	Uniprot_Gallus-gallus(chicken)_Rev+Unrev51565sequences_Jan2024	20	;;;cytosol,plasma membrane,sperm flagellum	;;;nucleoside diphosphate phosphorylation,cell cycle arrest,nucleoside triphosphate biosynthetic process,ATP metabolic process	;;;adenylate kinase activity,nucleoside diphosphate kinase activity,ATP binding	0.112	1.4338	1.3218	0.931081	0.474696	0.0266177	0.450682	0.299385	0.0494204	17.85	18.16	18.8	17.32	18.37	19.29	18.48	19.46	19.59	20.2	17.82	17.02	17.14	17.11	21.68	18.87	18.83	10163273	236446	292806	456309	163217	337826	641078	366277	719642	786766	1.20254e+06	231875	133069	143999	141916
P51913	ENOA_CHICK	ENO1	Alpha-enolase	Uniprot_Gallus-gallus(chicken)_Rev+Unrev51565sequences_Jan2024	4	phosphopyruvate hydratase complex,cytosol	gluconeogenesis,glycolytic process	magnesium ion binding,phosphopyruvate hydratase activity	-1.4016	-0.7966	0.605	0.000489664	0.0350963	0.0227455	0.00617888	0.0584356	0.044923	18.86	19.07	19.72	18.57	19.17	19.76	19.26	19.69	19.93	19.94	18.51	18.24	17.93	18.13	18.72	18.96	19.29	10041708	475182	550550	863834	389823	590978	885439	628125	844040	1.00238e+06	1.00589e+06	373405	310391	249554	286244
P07322	ENOB_CHICK	ENO3	Beta-enolase	Uniprot_Gallus-gallus(chicken)_Rev+Unrev51565sequences_Jan2024	3	phosphopyruvate hydratase complex,cytosol	gluconeogenesis,glycolytic process	magnesium ion binding,phosphopyruvate hydratase activity	-1.4416	-1.2345	0.2071	0.0541695	0.0446661	0.662362	0.0768396	0.0679221	0.364082	19.42	19.91	19.88	17.85	19.11	18.95	19.14	18.77	20.45	19.96	18.89	13.74	18.29	18.05	18.53	18.94	19.02	9934186	700669	985211	961970	236475	566476	505789	575893	446073	1.43601e+06	1.0197e+06	484447	13690.9	319458	271018
A0A182C5X3;Q5ZK63	A0A182C5X3_CHICK;TCP4_CHICK	;SUB1	Activated RNA polymerase II transcriptional coactivator p15	Uniprot_Gallus-gallus(chicken)_Rev+Unrev51565sequences_Jan2024	13	;nucleus,transcription factor complex	;transcription, DNA-templated,positive regulation of transcription initiation from RNA polymerase II promoter	;DNA binding,transcription coactivator activity	0.9987	1.8999	0.9011	0.556088	0.399929	0.00749825	0.32781	0.271306	0.0239793	17.74	17.78	18.53	17.95	18.1	18.87	18.83	18.7	18.78	19.45	18.25	17.38	17.54	17.81	21.99	18.79	18.83	9877160	218941	225406	378841	252967	281456	480456	465074	425169	448816	715890	311958	170682	190725	229728
E1C8V9	E1C8V9_CHICK	SNRPGP15	Small nuclear ribonucleoprotein G	Uniprot_Gallus-gallus(chicken)_Rev+Unrev51565sequences_Jan2024	6	nucleoplasm,U5 snRNP,U1 snRNP,U2 snRNP,U4 snRNP,U12-type spliceosomal complex,SMN-Sm protein complex,P granule,U2-type prespliceosome,precatalytic spliceosome,catalytic step 2 spliceosome,spliceosomal tri-snRNP complex,intracellular ribonucleoprotein complex	spliceosomal snRNP assembly,mRNA splicing, via spliceosome,RNA processing	RNA binding	0.9921	1.2202	0.2281	0.211019	0.16174	0.280618	0.18307	0.154491	0.218534	18.49	18.28	18.79	18.78	18.67	18.7	19.2	18.63	18.37	19.15	19.06	19.25	19.22	19.47	21.05	18.61	18.7	9866895	368312	318544	453057	450414	417979	425030	600976	405167	337714	583387	545226	621383	610803	724866
A0A1D5NVI1	A0A1D5NVI1_CHICK	RPL9	Large ribosomal subunit protein uL6	Uniprot_Gallus-gallus(chicken)_Rev+Unrev51565sequences_Jan2024	16	ribosome	translation	structural constituent of ribosome,rRNA binding	-0.3992	-0.1976	0.2016	0.242458	0.567232	0.0607078	0.199144	0.331562	0.0823194	18.94	19.1	19.36	19.25	19.3	19.58	19.28	19.45	19.29	19.38	19.26	19.42	19.31	19.19	15.48	18.48	18.58	9856648	502085	561927	674454	625638	647171	783940	638768	718197	641664	680410	629805	703169	649239	597938
A0A8V0X7X7	A0A8V0X7X7_CHICK	STIP1	Stress-induced-phosphoprotein 1	Uniprot_Gallus-gallus(chicken)_Rev+Unrev51565sequences_Jan2024	55				0.5578	0.8408	0.283	0.548295	0.417383	0.067498	0.325022	0.278033	0.0880061	18.64	18.78	18.98	18.48	18.81	18.93	18.9	18.91	18.98	19.37	18.8	18.48	18.62	18.57	21.15	18.94	18.95	9833123	407330	450325	517590	366275	459989	499931	488620	492735	517873	679393	456495	365704	403665	389458
A0A8V0ZNA1;A0A8V0ZQL0;P61355	A0A8V0ZNA1_CHICK;A0A8V0ZQL0_CHICK;RL27_CHICK	RPL27	Large ribosomal subunit protein eL27	Uniprot_Gallus-gallus(chicken)_Rev+Unrev51565sequences_Jan2024	9	;;large ribosomal subunit,cytosolic large ribosomal subunit,cytoplasmic side of rough endoplasmic reticulum membrane	;;translation	;;structural constituent of ribosome	0.2897	0.0099	-0.2798	0.106886	0.94934	0.0339254	0.118417	0.45608	0.0573921	19.28	19.24	18.9	19.42	19.29	19.06	19.11	18.94	18.84	18.79	18.88	19.26	19.1	19.25	19.63	18.95	19.04	9775084	635442	617161	489421	699939	642274	547020	566271	503853	469036	454316	483658	628013	561441	622036
A0A8V0ZCL6;Q90ZK7	A0A8V0ZCL6_CHICK;Q90ZK7_CHICK	FKBP3;FKBP25	peptidylprolyl isomerase	Uniprot_Gallus-gallus(chicken)_Rev+Unrev51565sequences_Jan2024	24	;cytoplasm	;chaperone-mediated protein folding,protein peptidyl-prolyl isomerization	;peptidyl-prolyl cis-trans isomerase activity,FK506 binding	0.3142	0.8884	0.5742	0.780407	0.521396	0.0111668	0.403913	0.315751	0.029716	18.42	18.66	18.97	18.28	18.66	19.09	19.05	19.06	19.11	19.59	18.07	17.72	17.95	18.13	21.36	18.93	18.93	9739590	351234	414584	514090	318945	414779	556557	541311	545929	565343	788846	275477	215764	253694	287374
Q98TH5	Q98TH5_CHICK	cRPS11	Small ribosomal subunit protein uS17	Uniprot_Gallus-gallus(chicken)_Rev+Unrev51565sequences_Jan2024	22	ribosome	translation	structural constituent of ribosome	-1.4041	-0.7198	0.6844	0.000396954	0.0181569	0.0063751	0.00565393	0.0392468	0.0221409	19.13	18.77	18.87	19.14	19.18	19.69	19.64	19.38	19.69	20.08	18.37	18.49	18.94	18.01	17.2	19.06	19.13	9717755	574109	447991	480248	579501	593181	844341	819597	680829	845461	1.10851e+06	339682	368615	501194	264006
A0A8V0ZHE1;E1C1D1	A0A8V0ZHE1_CHICK;E1C1D1_CHICK	ANXA7	Annexin	Uniprot_Gallus-gallus(chicken)_Rev+Unrev51565sequences_Jan2024	25	;nuclear envelope,endoplasmic reticulum membrane,cytosol,plasma membrane,chromaffin granule membrane	;cellular calcium ion homeostasis,autophagy,hemostasis,cell proliferation,regulation of cell shape,response to salt stress,cellular water homeostasis,negative regulation of gene expression,epithelial cell differentiation,social behavior	;integrin binding,calcium ion binding,calcium-dependent phospholipid binding,calcium-dependent protein binding	-1.1726	-1.0329	0.1398	1.89878e-05	0.00914416	0.449742	0.00148055	0.0267277	0.290215	19.03	19.42	19.8	18.86	19.42	19.43	19.24	19.61	19.6	19.51	18.63	18.17	18.33	18.3	18.07	19.05	18.98	9679750	534635	703714	911120	475525	702678	704882	619894	797597	796397	747389	404336	295787	329343	322244
P27731	TTHY_CHICK	TTR	Transthyretin	Uniprot_Gallus-gallus(chicken)_Rev+Unrev51565sequences_Jan2024	9	extracellular space,clathrin-coated vesicle,macromolecular complex,yolk	oocyte growth,response to virus,regulation of receptor activity,retinol metabolic process,protein tetramerization,macromolecular complex assembly,thyroid hormone transport,purine nucleobase metabolic process	hormone activity,protein binding,protein domain specific binding,small molecule binding,hormone binding,protein heterodimerization activity,thyroid hormone binding	-0.0129	3.0983	3.1112	0.991769	0.333648	0.00720968	0.468581	0.243655	0.023568	16.17	16.51	16.93	16.04	16.97	19.91	18.83	19.3	19.59	20.34	17.2	17.18	17.16	17.68	21.75	18.41	18.6	9621290	73735.6	93163.2	124596	67249.9	128724	981852	464608	645053	791527	1329196	150825	148015	146529	209862
A0A1D5PPN9	A0A1D5PPN9_CHICK	HSP90B1	Endoplasmin	Uniprot_Gallus-gallus(chicken)_Rev+Unrev51565sequences_Jan2024	62		protein folding,response to stress	ATP binding,unfolded protein binding	0.2054	0.4241	0.2187	0.489725	0.192574	0.29447	0.304403	0.172779	0.225396	18.97	18.58	18.71	18.72	19.24	19.41	19.05	19.35	18.73	18.72	19.38	19.46	19.59	19.54	17.88	18.97	18.99	9390936	514246	390636	430092	431977	617400	697341	543936	667322	433469	432628	683807	721598	789226	763365
E1BSN7	E1BSN7_CHICK	PYGB	Alpha-1,4 glucan phosphorylase	Uniprot_Gallus-gallus(chicken)_Rev+Unrev51565sequences_Jan2024	74	cell,apical part of cell,perinuclear region of cytoplasm,cytoplasm	glycogen catabolic process	glycogen phosphorylase activity,pyridoxal phosphate binding,Requires Ontology	-0.3766	-1.8713	-1.4947	0.18408	1.47653e-05	9.415e-07	0.167804	0.001351	0.000435332	19.85	20.08	19.94	19.98	19.94	18.47	18.48	18.5	18.58	18.28	18.33	18.2	18.51	18.24	16.27	18.91	18.94	9297372	948191	1.10906e+06	1.00468e+06	1.03339e+06	1.00307e+06	361860	366513	371908	391124	317770	329930	301126	374338	309015
Q5ZLQ6	1433B_CHICK	YWHAB	14-3-3 protein beta/alpha	Uniprot_Gallus-gallus(chicken)_Rev+Unrev51565sequences_Jan2024	12	cytosol,perinuclear region of cytoplasm	protein targeting,negative regulation of protein dephosphorylation,positive regulation of catalytic activity,negative regulation of G-protein coupled receptor protein signaling pathway,cytoplasmic sequestering of protein	protein domain specific binding,identical protein binding,histone deacetylase binding,cadherin binding,phosphoserine binding	0.0329	0.136	0.1031	0.900823	0.632888	0.230588	0.441247	0.354087	0.193263	18.89	18.98	19.26	18.84	19.04	19.07	19.11	19.17	19.11	19.09	19.19	18.61	18.93	18.77	19.86	18.72	18.92	9290825	484988	516946	625718	470532	538356	549504	566608	591351	566391	557931	599402	400913	499443	447624
A0A8V0ZVS5;A0A8V1A0Y3;A0A8V1A8G1	A0A8V0ZVS5_CHICK;A0A8V1A0Y3_CHICK;A0A8V1A8G1_CHICK	CS	Citrate synthase	Uniprot_Gallus-gallus(chicken)_Rev+Unrev51565sequences_Jan2024	24	;;	;;	;;	-0.0456	0.3895	0.435	0.9515	0.635917	0.279362	0.456752	0.355225	0.218025	19.14	18.77	18.78	18.81	18.28	18.88	18.89	20.07	18.84	18.94	17.98	18.39	18.49	18.24	20.67	18.83	18.8	9171020	576893	447100	450554	458249	319103	481916	486680	1.10318e+06	469574	503119	259084	342594	368686	309030
A0A8V0Y2Q5;A0A8V0Y7F4;A0A8V0Y7G4;A0A8V0Y8Z9;A0A8V0Y905;A0A8V0Y910;Q9DE13	A0A8V0Y2Q5_CHICK;A0A8V0Y7F4_CHICK;A0A8V0Y7G4_CHICK;A0A8V0Y8Z9_CHICK;A0A8V0Y905_CHICK;A0A8V0Y910_CHICK;BAZ2B_CHICK	BAZ2B	Bromodomain adjacent to zinc finger domain 2B;Bromodomain adjacent to zinc finger domain 2B;Bromodomain adjacent to zinc finger domain 2B;Bromodomain adjacent to zinc finger domain 2B;Bromodomain adjacent to zinc finger domain 2B;Bromodomain adjacent to zinc finger domain 2B;Bromodomain adjacent to zinc finger domain protein 2B	Uniprot_Gallus-gallus(chicken)_Rev+Unrev51565sequences_Jan2024	13	;;;;;;nucleus	;;;;;;transcription, DNA-templated,regulation of transcription, DNA-templated	;;;;;;DNA binding,metal ion binding	-0.4	-0.1666	0.2334	0.157954	0.582537	0.144563	0.15214	0.33704	0.143346	19.24	18.97	18.72	19.38	18.71	19.34	19.36	19.33	19.18	19.09	18.86	19.31	19.28	18.8	17.34	18.83	18.86	9155645	619705	514270	432063	682803	429681	662996	674640	658472	593443	559230	477270	649318	637373	456691
Q5ZL58	Q5ZL58_CHICK	SNRPD3	Small nuclear ribonucleoprotein Sm D3	Uniprot_Gallus-gallus(chicken)_Rev+Unrev51565sequences_Jan2024	7	commitment complex,U5 snRNP,U7 snRNP,U1 snRNP,U2 snRNP,U4 snRNP,U12-type spliceosomal complex,telomerase holoenzyme complex,cytosol,nuclear body,methylosome,pICln-Sm protein complex,SMN-Sm protein complex,U2-type catalytic step 2 spliceosome,prespliceosome,precatalytic spliceosome,catalytic step 2 spliceosome,spliceosomal tri-snRNP complex	spliceosomal complex assembly,spliceosomal snRNP assembly,protein methylation	RNA binding,enzyme binding,U2 snRNA binding,telomerase RNA binding,histone pre-mRNA DCP binding,U7 snRNA binding	1.6707	1.1663	-0.5044	0.085727	0.1406	0.00571216	0.10255	0.140822	0.020914	18.48	18.42	18.67	18.91	18.72	18.05	18.38	18.23	18.02	18.01	19.08	19.17	19.35	19.57	20.95	18.79	18.94	9086425	364389	349821	416997	494063	433168	272225	341610	308156	265576	263500	554145	588969	668461	777815
A0A1D5NYK7;A0A8V0YR37	A0A1D5NYK7_CHICK;A0A8V0YR37_CHICK	MSN	Moesin	Uniprot_Gallus-gallus(chicken)_Rev+Unrev51565sequences_Jan2024	44	;	;	;	-0.1537	0.2407	0.3944	0.427365	0.300147	0.00300116	0.28181	0.228166	0.0152271	18.62	18.88	19.06	18.63	18.77	19.26	19.08	19.21	19.32	19.1	19.03	18.62	18.9	18.88	19.6	18.94	18.99	9013336	403084	482656	546026	405934	448406	629057	552442	607800	654946	560579	534139	401631	487748	482843
A0A8V0XBU4;P13731	A0A8V0XBU4_CHICK;SERPH_CHICK	SERPINH1	Serpin H1	Uniprot_Gallus-gallus(chicken)_Rev+Unrev51565sequences_Jan2024	27	;endoplasmic reticulum,endoplasmic reticulum lumen,endoplasmic reticulum-Golgi intermediate compartment,membrane raft,extracellular space	;chondrocyte development involved in endochondral bone morphogenesis,negative regulation of endopeptidase activity,collagen fibril organization,collagen biosynthetic process,protein maturation	;serine-type endopeptidase inhibitor activity,collagen binding,unfolded protein binding	1.6049	1.2482	-0.3566	0.0315301	0.0495794	0.0754263	0.0548423	0.0725815	0.0944111	18.37	18.41	18.55	18.52	18.91	18.62	18.05	18.09	17.76	18.38	20.13	20.06	20.17	19.99	17.26	18.78	18.8	8987816	339727	349405	385010	376995	493046	403982	272060	279088	222563	340696	1.14431e+06	1.09234e+06	1.18102e+06	1.04378e+06
E1C2S1	E1C2S1_CHICK	TLN1	Talin 1	Uniprot_Gallus-gallus(chicken)_Rev+Unrev51565sequences_Jan2024	176				-0.495	-0.2961	0.1988	0.012883	0.0927246	0.0346418	0.0320733	0.107746	0.0579678	18.93	19.08	19.12	19.05	19.03	19.23	19.11	19.39	19.36	19.1	18.97	18.74	18.93	18.88	18.01	18.88	18.94	8987806	499686	554812	568762	541749	535717	614826	565777	687084	671738	560385	515139	438660	499301	481988
E1C4N0	E1C4N0_CHICK	RPS10	Ribosomal protein S10	Uniprot_Gallus-gallus(chicken)_Rev+Unrev51565sequences_Jan2024	19	cytosolic small ribosomal subunit	ribosomal small subunit assembly	RNA binding,structural constituent of ribosome,poly(A) RNA binding	0.5406	0.4647	-0.0758	0.196498	0.247611	0.546662	0.175006	0.202124	0.324466	18.79	18.68	19.22	18.77	18.86	18.75	18.97	18.74	18.61	18.91	19.04	18.65	19.05	19.32	20.17	18.9	18.88	8986082	453289	420862	608874	448481	476219	440672	512401	439092	398961	493328	538382	410041	541336	656756
A0A8V0X547	A0A8V0X547_CHICK	MYOM1	Myomesin 1	Uniprot_Gallus-gallus(chicken)_Rev+Unrev51565sequences_Jan2024	136				-1.0505	-1.2754	-0.2249	0.000301095	3.1614e-06	0.057608	0.00504585	0.000691579	0.0796808	19.35	19.4	19.37	19.45	19.53	19.23	19.18	18.98	19.04	19.49	18.22	18.31	18.35	18.15	17.57	18.94	18.89	8953920	668384	693942	676368	714768	757316	616617	592948	518456	537166	738749	305112	324510	335234	290860
A0A1D5NYA8;A0A8V1A4B0	A0A1D5NYA8_CHICK;A0A8V1A4B0_CHICK	DNAJA4	DnaJ heat shock protein family (Hsp40) member A4	Uniprot_Gallus-gallus(chicken)_Rev+Unrev51565sequences_Jan2024	21	;	protein folding,response to heat;	ATP binding,heat shock protein binding,metal ion binding,unfolded protein binding;	-0.3772	-0.3817	-0.0045	0.187146	0.199783	0.975089	0.169716	0.176904	0.463865	19.1	18.85	19.17	18.95	19.49	19.39	19.03	19.13	19	19.03	18.78	19.11	19.15	18.83	17.03	18.95	18.94	8932008	563346	471355	587866	505462	737880	686101	536060	572446	525509	536917	449492	567028	582091	467390
A0A8V0ZI80	A0A8V0ZI80_CHICK	VCL	Vinculin	Uniprot_Gallus-gallus(chicken)_Rev+Unrev51565sequences_Jan2024	88				-0.6548	-0.354	0.3007	4.8297e-06	0.00834321	0.0068409	0.000813914	0.0254473	0.0229926	18.95	18.96	19.21	18.78	19.07	19.27	19.31	19.39	19.25	19.28	18.77	18.54	18.71	18.71	18.47	18.88	18.89	8875557	507956	508254	608512	449658	549262	633603	651106	685933	623390	637650	447334	382428	429751	428857
F1N9H4	F1N9H4_CHICK	EEF1A2	Elongation factor 1-alpha	Uniprot_Gallus-gallus(chicken)_Rev+Unrev51565sequences_Jan2024	19	intracellular,eukaryotic translation elongation factor 1 complex,myelin sheath	translational elongation,positive regulation of apoptotic process,positive regulation of lipid kinase activity,translation	translation elongation factor activity,GTPase activity,GTP binding,protein kinase binding	-1.0004	-0.7851	0.2153	0.000840354	0.0230133	0.297659	0.00808785	0.0452535	0.226884	18.87	19.23	19.62	18.67	19	19.42	18.94	19.33	19.55	19.36	18.78	18.12	18.55	18.43	17.45	19	19.07	8862854	477887	615936	808520	416714	523006	699549	501831	656930	768432	672723	448666	285462	384092	352426
Q5ZL39	Q5ZL39_CHICK	PPP1CC	Serine/threonine-protein phosphatase	Uniprot_Gallus-gallus(chicken)_Rev+Unrev51565sequences_Jan2024	24				0.742	0.682	-0.06	0.200906	0.224883	0.393076	0.177504	0.190424	0.268534	18.67	18.84	18.77	18.75	18.77	18.68	18.87	18.75	18.68	18.5	19.06	18.87	19	19.08	20.48	18.71	18.75	8782764	417597	470051	446118	439862	446567	419651	478749	441328	420380	369694	548309	478805	523150	552833
Q9I8D6	Q9I8D6_CHICK	tcp-1 delta	T-complex protein 1 subunit delta	Uniprot_Gallus-gallus(chicken)_Rev+Unrev51565sequences_Jan2024	40	chaperonin-containing T-complex	'de novo' protein folding	protein binding involved in protein folding,unfolded protein binding	-0.0607	0.008	0.0687	0.724329	0.96205	0.346395	0.384854	0.459919	0.249152	18.96	18.99	18.89	18.91	19.09	18.95	19.03	19.14	19.18	18.87	19.04	19.1	19.15	19.2	18.18	18.81	18.89	8780702	509238	519670	487398	491134	558065	506455	533635	577216	593210	480119	537865	561417	581469	601392
A0A8V0ZU56;O42254	A0A8V0ZU56_CHICK;IF2B1_CHICK	IGF2BP1	Insulin-like growth factor 2 mRNA-binding protein 1	Uniprot_Gallus-gallus(chicken)_Rev+Unrev51565sequences_Jan2024	36	;nucleus,nucleoplasm,cytosol,cytoplasmic stress granule,lamellipodium,filopodium,growth cone,perinuclear region of cytoplasm,CRD-mediated mRNA stability complex	;regulation of mRNA stability involved in response to stress,positive regulation of neuron projection development,negative regulation of translation,pallium cell proliferation in forebrain,mRNA transport,CRD-mediated mRNA stabilization,neuronal stem cell population maintenance	;mRNA binding,mRNA 3'-UTR binding,translation regulator activity,mRNA 5'-UTR binding	0.6973	0.382	-0.3153	0.0979784	0.263581	0.043779	0.11184	0.210351	0.067105	18.97	18.98	18.81	19.08	18.87	18.83	18.79	18.71	18.64	18.06	19.53	19.6	19.57	19.56	17.53	18.89	18.77	8772599	512334	517734	458204	554748	480129	465231	453184	428258	408774	272362	754859	793604	775815	774660
F1NYA9	F1NYA9_CHICK	EEF1B2	Elongation factor 1-beta	Uniprot_Gallus-gallus(chicken)_Rev+Unrev51565sequences_Jan2024	17	endoplasmic reticulum,eukaryotic translation elongation factor 1 complex	translational elongation	translation elongation factor activity	0.7977	0.8308	0.0331	0.380292	0.365848	0.829115	0.263605	0.257704	0.419605	18.63	18.47	18.78	18.63	18.76	18.42	18.76	18.56	18.5	19.11	18.71	18.55	18.61	18.83	20.93	18.61	18.75	8699331	405858	362926	449489	404527	444117	349530	442993	385790	369562	566955	429007	383205	400132	467187
Q5ZMS3	IF2G_CHICK	EIF2S3	Eukaryotic translation initiation factor 2 subunit 3	Uniprot_Gallus-gallus(chicken)_Rev+Unrev51565sequences_Jan2024	28	eukaryotic translation initiation factor 2 complex,cytoplasm,cytosol	translational initiation,formation of translation preinitiation complex	translation initiation factor activity,GTPase activity,GTP binding	-0.3138	-0.2168	0.097	0.309859	0.461975	0.408808	0.233021	0.294879	0.274783	18.92	19.04	18.97	19.03	19.02	19.31	19.01	19.2	19.19	18.69	19.02	19.08	19.04	19.03	16.49	18.83	18.86	8615021	497542	539493	513291	535918	532585	647733	528293	601418	599549	423928	531545	554531	540296	534871
A0A8V0YZ41;A0A8V0Z605;Q5ZM36	A0A8V0YZ41_CHICK;A0A8V0Z605_CHICK;IF4A3_CHICK	EIF4A3	RNA helicase;RNA helicase;Eukaryotic initiation factor 4A-III	Uniprot_Gallus-gallus(chicken)_Rev+Unrev51565sequences_Jan2024	27	;;nucleolus,cytoplasm,nuclear speck,catalytic step 2 spliceosome	;;nuclear-transcribed mRNA catabolic process, nonsense-mediated decay,regulation of alternative mRNA splicing, via spliceosome,mRNA processing,regulation of translation,RNA splicing,regulation of gene expression,RNA secondary structure unwinding,mRNA transport	;;RNA binding,ATP-dependent RNA helicase activity,ATP binding	0.6673	0.3804	-0.2869	0.0662603	0.199975	0.0598725	0.0870216	0.177023	0.0816984	18.99	18.77	18.85	19.18	18.73	18.77	18.81	18.72	18.55	18.21	19.37	19.59	19.52	19.48	18.02	18.73	18.78	8592771	521728	447488	472377	592612	435313	446392	460223	431680	383689	302203	677591	787544	754061	728967
A0A8V1A8B6	A0A8V1A8B6_CHICK	MAP4	Microtubule-associated protein	Uniprot_Gallus-gallus(chicken)_Rev+Unrev51565sequences_Jan2024	72				1.7452	1.7898	0.0446	0.321331	0.315617	0.830558	0.238081	0.235573	0.420016	17.95	18.2	18.35	17.9	18.11	18	17.98	17.85	18.03	18.73	18.83	18.28	18.24	18.58	21.7	18.53	18.62	8542116	252434	300839	333613	244550	282053	261515	258259	236534	267133	434440	466246	318826	310566	392674
A0A1L1RLN6	A0A1L1RLN6_CHICK	MYL6	Myosin, light chain 6, alkali, smooth muscle and non-muscle	Uniprot_Gallus-gallus(chicken)_Rev+Unrev51565sequences_Jan2024	14			calcium ion binding	2.4874	2.0161	-0.4713	0.283894	0.320595	0.106299	0.220199	0.237779	0.117992	18.16	17.43	17.89	18.43	18.06	17.21	17.72	17.18	17.22	18.18	18.12	18.21	18.52	18.91	21.92	18.44	18.73	8507928	292120	176186	242190	353952	273823	151446	216188	148409	153019	296229	285581	303673	376513	491747
A0A8V0ZBP0	A0A8V0ZBP0_CHICK	DYL1	Dynein light chain	Uniprot_Gallus-gallus(chicken)_Rev+Unrev51565sequences_Jan2024	8				0.9333	0.7497	-0.1836	0.0586932	0.0901426	0.0889877	0.0806919	0.10581	0.10498	18.55	18.54	18.86	18.76	18.76	18.5	18.61	18.42	18.29	18.71	19.16	19.05	19.21	19.21	20.24	18.7	18.82	8469673	384843	380931	475741	442997	443006	371494	399370	351474	321292	429643	586657	542634	604879	607536
A0A8V0YFC7;A0A8V0YLQ1	A0A8V0YFC7_CHICK;A0A8V0YLQ1_CHICK	PGK2	Phosphoglycerate kinase	Uniprot_Gallus-gallus(chicken)_Rev+Unrev51565sequences_Jan2024	2	;	;	;	0.6562	1.397	0.7408	0.680644	0.493486	0.0046033	0.370271	0.305634	0.018848	18.37	18.17	18.16	17.63	18.24	19.07	18.59	19.13	18.94	18.54	17.38	16.96	16.9	16.81	21.63	18.52	18.63	8414688	338080	295828	292879	202572	309532	549048	395443	573583	504466	382070	170710	127419	121874	114719
A0A1D5PKI0	A0A1D5PKI0_CHICK	LOC121111746	H1.10 linker histone	Uniprot_Gallus-gallus(chicken)_Rev+Unrev51565sequences_Jan2024	17	nucleosome,nucleus	nucleosome assembly	DNA binding	1.7521	1.2313	-0.5208	0.0673523	0.111661	0.012615	0.0878963	0.121807	0.0317613	18.25	18.45	18.86	18.36	18.57	18.13	17.85	17.84	17.97	18.15	19.43	19.36	19.1	19.17	20.83	18.64	18.67	8398324	312320	358411	476320	336125	389214	287399	236278	234703	256600	290031	705201	674193	560368	589830
A0A8V0YBF7;Q98SE2	A0A8V0YBF7_CHICK;Q98SE2_CHICK	U2AF1	U2 small nuclear RNA auxiliary factor 1	Uniprot_Gallus-gallus(chicken)_Rev+Unrev51565sequences_Jan2024	13	;U2AF,spliceosomal complex	;mRNA splicing, via spliceosome	;pre-mRNA 3'-splice site binding	-0.1235	0.0333	0.1568	0.599788	0.877031	0.278209	0.342638	0.434122	0.217513	18.88	18.76	18.79	18.84	18.98	18.92	19.17	18.78	18.75	19.33	18.96	19.18	19.23	18.81	17.9	18.83	18.92	8385219	480898	443569	454224	470777	515977	495728	590001	449093	441671	660569	509281	593860	614061	458960
A0A8V0YS29	A0A8V0YS29_CHICK	RPL35A	Large ribosomal subunit protein eL33	Uniprot_Gallus-gallus(chicken)_Rev+Unrev51565sequences_Jan2024	15				0.2981	-0.0635	-0.3616	0.0409994	0.644139	0.0267869	0.0644159	0.357828	0.0495914	19.09	18.97	18.7	19.21	19.26	18.69	18.75	18.65	18.64	18.76	18.68	18.91	19.22	18.97	19.14	18.79	18.8	8384430	558013	514734	425589	606773	627779	421722	440049	411181	409348	444654	420608	492551	609558	513270
A0A8V0Y526	A0A8V0Y526_CHICK	LOC101749377	Heterogeneous nuclear ribonucleoprotein L	Uniprot_Gallus-gallus(chicken)_Rev+Unrev51565sequences_Jan2024	31				0.6334	0.2814	-0.352	0.0931728	0.338241	0.00936575	0.108149	0.245659	0.0270603	18.81	18.83	18.9	19.04	18.89	18.7	18.7	18.59	18.5	18.16	19.4	19.4	19.43	19.36	17.67	18.81	18.79	8229641	458466	466263	490125	537418	487393	426788	426958	395743	369936	292001	689534	691251	704544	671000
F1NEQ6	F1NEQ6_CHICK	PSMA6	Proteasome subunit alpha type	Uniprot_Gallus-gallus(chicken)_Rev+Unrev51565sequences_Jan2024	21	cytoplasmic mRNA processing body,nucleoplasm,polysome,nuclear matrix,proteasome core complex, alpha-subunit complex,nucleus,cytoplasm,proteasome core complex	ubiquitin-dependent protein catabolic process,positive regulation of NF-kappaB transcription factor activity,proteasomal protein catabolic process,proteasomal ubiquitin-independent protein catabolic process,proteasome-mediated ubiquitin-dependent protein catabolic process	RNA binding,threonine-type endopeptidase activity,NF-kappaB binding,endopeptidase activity	0.6765	0.5905	-0.0859	0.432644	0.476965	0.462439	0.283968	0.300186	0.29501	18.61	18.83	18.74	18.57	18.77	18.69	18.49	18.72	18.86	18.26	18.5	18.45	18.51	18.49	20.74	18.72	18.71	8225039	399138	464616	437498	389269	445842	423094	367777	433082	475134	313745	369814	359026	373335	369409
A0A1D5P1W7;A0A8V0ZYK5	A0A1D5P1W7_CHICK;A0A8V0ZYK5_CHICK	KPNB1	Karyopherin subunit beta 1	Uniprot_Gallus-gallus(chicken)_Rev+Unrev51565sequences_Jan2024	56	intracellular;	intracellular protein transport;	Ran GTPase binding;	-0.1701	-0.2423	-0.0722	0.522858	0.343799	0.43212	0.316247	0.24802	0.283737	18.98	19.03	18.99	19.01	18.97	18.94	19.07	18.99	19	18.55	19.01	18.97	19.06	18.86	17.14	18.79	18.71	8186634	516695	534786	519074	527330	513614	503622	550821	519376	525637	384533	526622	514807	545256	477109
Q6EE32	Q6EE32_CHICK		Calreticulin (Fragment)	Uniprot_Gallus-gallus(chicken)_Rev+Unrev51565sequences_Jan2024	2				1.0675	1.7455	0.678	0.393952	0.268803	0.0126725	0.26893	0.212889	0.0318482	17.79	17.74	18.18	17.77	18.06	18.82	18.48	18.7	18.02	18.83	18.53	18.44	18.45	18.67	21.34	18.49	18.66	8167061	226310	218798	297569	224124	273904	461649	366620	426188	265362	465253	378104	356413	357119	416982
A0A8V0XW68;Q5ZJV5	A0A8V0XW68_CHICK;Q5ZJV5_CHICK	COX4I1;RCJMB04_15g7	Cytochrome c oxidase subunit 4	Uniprot_Gallus-gallus(chicken)_Rev+Unrev51565sequences_Jan2024	7	;nucleus,mitochondrial respiratory chain complex IV,integral component of membrane	;mitochondrial electron transport, cytochrome c to oxygen,hydrogen ion transmembrane transport	;cytochrome-c oxidase activity	-0.9932	1.7964	2.7896	0.322228	0.00371823	0.123023	0.238457	0.0170769	0.129274	17.39	16.83	15.96	17.05	17.1	19.05	18.68	18.9	18.93	21.19	18.51	18.76	18.91	19.2	18.03	18.91	18.97	8156144	172081	116108	63947.7	135559	140084	541964	419864	489771	499298	2389744	374225	443612	494003	601758
F1N910	F1N910_CHICK	NME1	Nucleoside diphosphate kinase	Uniprot_Gallus-gallus(chicken)_Rev+Unrev51565sequences_Jan2024	7	intracellular	nucleoside diphosphate phosphorylation,GTP biosynthetic process,UTP biosynthetic process,CTP biosynthetic process,regulation of apoptotic process	nucleoside diphosphate kinase activity,ATP binding	0.8892	1.3373	0.4481	0.544307	0.433565	0.278357	0.323685	0.284307	0.217529	16.99	17.9	19.02	18.02	18.31	18.63	18.4	18.6	17.9	19.31	18.63	17.55	17.24	17.52	21.44	18.11	18.55	7978091	129852	244138	530849	265218	325167	404352	345613	396874	244954	648008	405165	191820	154849	187760
P16527	MARCS_CHICK	MARCKS	Myristoylated alanine-rich C-kinase substrate	Uniprot_Gallus-gallus(chicken)_Rev+Unrev51565sequences_Jan2024	29	cytoplasm,cytoskeleton,membrane		actin binding,calmodulin binding	1.432	1.6973	0.2653	0.199494	0.165979	0.369377	0.17674	0.157159	0.259208	17.89	17.82	18.27	17.99	18	18.02	18.29	17.85	17.89	18.97	19.38	18.85	18.51	18.93	21.09	18.57	18.72	7967680	243673	231588	315519	260013	261910	266327	319847	236832	242331	512372	681721	473126	373132	499687
Q04619	HS90B_CHICK	HSP90AB1	Heat shock cognate protein HSP 90-beta	Uniprot_Gallus-gallus(chicken)_Rev+Unrev51565sequences_Jan2024	33	extracellular region,nucleus,cytoplasm,aryl hydrocarbon receptor complex,melanosome	protein folding,response to stress,positive regulation of transforming growth factor beta receptor signaling pathway,negative regulation of proteasomal ubiquitin-dependent protein catabolic process,negative regulation of cell cycle arrest,negative regulation of transforming growth factor beta activation	ATP binding,protein dimerization activity,unfolded protein binding	-0.7174	-0.3667	0.3508	0.0407351	0.161288	0.178896	0.0641236	0.15424	0.164786	18.85	19.02	18.47	19.05	18.59	19.04	19.19	19.38	19.57	18.36	18.63	18.58	18.63	18.75	17.08	18.86	18.76	7938410	471719	530279	362805	541893	394155	537777	598303	682326	779235	336464	406849	393202	404916	441122
A0A8V1A993	A0A8V1A993_CHICK	PTGES3	Prostaglandin E synthase 3	Uniprot_Gallus-gallus(chicken)_Rev+Unrev51565sequences_Jan2024	10				-0.328	0.3788	0.7068	0.63666	0.66466	0.00670827	0.355437	0.364828	0.0227675	18.37	18.46	18.76	18.12	18.47	19.24	18.71	19.07	19.18	19.49	18.12	17.76	17.7	17.8	20.4	18.78	18.68	7916591	338656	360526	444766	285473	362846	617094	427965	551485	593975	734741	284792	222249	212333	228946
A0A8V0YSZ6;F1NCI5	A0A8V0YSZ6_CHICK;F1NCI5_CHICK	RBMXL3	Heterogeneous nuclear ribonucleoprotein A0	Uniprot_Gallus-gallus(chicken)_Rev+Unrev51565sequences_Jan2024	17	;nucleoplasm	;inflammatory response,response to lipopolysaccharide,3'-UTR-mediated mRNA stabilization	;AU-rich element binding,protein kinase binding	0.9841	0.9377	-0.0465	0.0198659	0.0216978	0.639851	0.0414992	0.0436521	0.356501	18.36	18.5	18.59	18.62	18.21	18.49	18.46	18.47	18.49	18.16	19.25	19.2	19.14	19.18	20.02	18.64	18.7	7857646	336592	371700	395619	402169	302860	366956	359898	362846	368465	293421	624565	603629	579380	595547
P48463	PP2AA_CHICK	PPP2CA	Serine/threonine-protein phosphatase 2A catalytic subunit alpha isoform	Uniprot_Gallus-gallus(chicken)_Rev+Unrev51565sequences_Jan2024	22	protein phosphatase type 2A complex,chromosome, centromeric region,spindle pole,nucleus,cytoplasm	protein dephosphorylation,apoptotic mitochondrial changes,regulation of gene expression,response to endoplasmic reticulum stress,response to hydrogen peroxide,proteasome-mediated ubiquitin-dependent protein catabolic process,response to antibiotic	phosphoprotein phosphatase activity,metal ion binding,protein heterodimerization activity	1.1062	0.9943	-0.1119	0.3148	0.34582	0.1949	0.235187	0.248896	0.174033	18.32	18.55	18.59	18.28	18.56	18.26	18.41	18.33	18.48	18.27	18.59	18.52	18.54	18.56	20.98	18.52	18.53	7844000	327894	384471	393963	318385	385141	314375	348180	330083	365482	316628	394544	377085	380948	387138
Q90XD9	Q90XD9_CHICK		Staphylococcal nuclease domain-containing protein 1 (Fragment)	Uniprot_Gallus-gallus(chicken)_Rev+Unrev51565sequences_Jan2024	41				0.3076	0.2356	-0.072	0.323521	0.422506	0.485654	0.239017	0.280101	0.302979	18.63	18.85	18.88	18.8	18.66	18.72	18.82	18.76	18.79	18.32	19.28	19.2	19.12	19.28	17.44	18.68	18.68	7819767	406386	472884	482555	456031	412887	433213	464065	445331	453067	326474	636575	603902	571086	637680
E1C2L5	E1C2L5_CHICK	ALYREF	Aly/REF export factor	Uniprot_Gallus-gallus(chicken)_Rev+Unrev51565sequences_Jan2024	15	nuclear speck		RNA binding	1.0285	1.0104	-0.0181	0.36037	0.365325	0.898153	0.255477	0.257456	0.440562	18.28	18.23	18.64	18.54	18.35	18.35	18.64	18.28	18.03	18.62	18.29	18.28	18.36	18.81	21	18.6	18.52	7785582	318894	307079	409796	381384	334893	334047	407938	317429	267845	402941	320546	319152	336948	458055
Q71SG1;Q90635	Q71SG1_CHICK;DPYL2_CHICK	CRMP2B;DPYSL2	Dihydropyrimidinase-related protein 2	Uniprot_Gallus-gallus(chicken)_Rev+Unrev51565sequences_Jan2024	41	;cytoplasm	;cytoskeleton organization,axon guidance,brain development,regulation of axon extension	;microtubule binding,hydrolase activity, acting on carbon-nitrogen (but not peptide) bonds	0.5764	0.8994	0.3229	0.413323	0.268478	0.051691	0.276438	0.212781	0.0744813	18.17	18.52	18.71	18.01	18.4	18.82	18.41	18.76	18.86	18.64	18.87	18.5	18.57	18.59	20.57	18.53	18.47	7782846	295500	376832	429694	263224	345075	461581	348937	443026	476613	409222	479968	370914	389322	395828
P09102	PDIA1_CHICK	P4HB	Protein disulfide-isomerase	Uniprot_Gallus-gallus(chicken)_Rev+Unrev51565sequences_Jan2024	45	endoplasmic reticulum,endoplasmic reticulum lumen,plasma membrane	protein folding,peptidyl-proline hydroxylation,response to endoplasmic reticulum stress,cell redox homeostasis,regulation of oxidative stress-induced intrinsic apoptotic signaling pathway	protein disulfide isomerase activity,peptidyl-proline 4-dioxygenase activity	1.1745	1.3382	0.1637	0.28633	0.252915	0.146158	0.221412	0.204905	0.144397	18.29	17.99	18.17	18.15	18.36	18.45	18.41	18.54	18.08	18.27	18.7	18.66	18.6	18.7	21.03	18.61	18.6	7778024	319822	260967	295327	290088	335994	358978	347463	381580	277600	317061	425471	412912	398142	426188
A0A8V1A477;A0A8V1A920;A0A8V1ABT6;A0A8V1AEH6	A0A8V1A477_CHICK;A0A8V1A920_CHICK;A0A8V1ABT6_CHICK;A0A8V1AEH6_CHICK	TPM3	Tropomyosin 3	Uniprot_Gallus-gallus(chicken)_Rev+Unrev51565sequences_Jan2024	19	;;;	;;;	;;;	2.5707	2.4963	-0.0744	0.0948546	0.0974612	0.782692	0.109411	0.111384	0.404572	17.71	17.15	17.43	17.59	17.57	17.2	17.5	17.01	16.94	18.14	19.4	19.3	19.03	19.46	21.33	18.47	18.49	7771390	214470	145257	176401	196984	193956	150164	184896	131612	125553	288233	690538	645562	534730	720864
A0A8V0ZS95	A0A8V0ZS95_CHICK		Peptidyl-prolyl cis-trans isomerase	Uniprot_Gallus-gallus(chicken)_Rev+Unrev51565sequences_Jan2024	2				0.8251	1.1316	0.3065	0.386543	0.292564	0.0952557	0.265894	0.224537	0.109724	18.01	18.11	18.65	17.89	18.42	18.54	18.51	18.5	18.32	18.83	18.61	18.37	18.55	18.54	20.86	18.44	18.61	7632912	264614	283510	411848	243387	350047	382270	372950	371324	327569	466937	401247	338542	383394	380685
P00504	AATC_CHICK	GOT1	Aspartate aminotransferase, cytoplasmic	Uniprot_Gallus-gallus(chicken)_Rev+Unrev51565sequences_Jan2024	41	cytosol,mitochondrion	gluconeogenesis,2-oxoglutarate metabolic process,glycerol biosynthetic process,cellular amino acid metabolic process,aspartate metabolic process,aspartate biosynthetic process,glutamate metabolic process	L-aspartate:2-oxoglutarate aminotransferase activity,pyridoxal phosphate binding,L-cysteine:2-oxoglutarate aminotransferase activity	-0.1288	0.4624	0.5912	0.905427	0.728646	0.0202098	0.442737	0.386326	0.0419024	18.14	18.45	18.91	17.96	18.42	19.03	18.44	19.07	19.26	19.09	17.31	16.8	16.78	16.92	20.85	18.5	18.53	7525280	288331	359303	492168	254390	350094	536466	355241	551056	627157	557821	162032	114297	112780	124107
A0A8V0ZPL8	A0A8V0ZPL8_CHICK	NEXN	Nexilin F-actin binding protein	Uniprot_Gallus-gallus(chicken)_Rev+Unrev51565sequences_Jan2024	50				-0.3889	0.0869	0.4758	0.388165	0.829013	0.180808	0.266451	0.419571	0.16587	18.67	18.34	18.59	18.62	18.59	18.7	19.34	18.57	18.51	19.7	18.24	18.31	18.22	18.17	19.66	18.6	18.64	7508822	415874	332362	395026	402506	395217	426740	661816	388405	372517	849887	309865	324982	304400	295072
A0A8V1A4V2	A0A8V1A4V2_CHICK	APOBEC2	Apolipoprotein B mRNA editing enzyme catalytic subunit 2	Uniprot_Gallus-gallus(chicken)_Rev+Unrev51565sequences_Jan2024	21				1.4582	-0.1212	-1.5794	0.0172077	0.6492	0.00075527	0.038049	0.359643	0.00767702	19.38	18.99	18.79	19.37	19.25	17.46	17.54	17.5	17.79	17.66	19.11	19.18	19.3	19.44	17.64	18.67	18.58	7482975	683158	521764	453393	678643	623925	180672	190736	185241	226793	207345	565956	595330	643960	713447
A0A8V0XGR2;E1C769	A0A8V0XGR2_CHICK;E1C769_CHICK	G3BP2	G3BP stress granule assembly factor 2	Uniprot_Gallus-gallus(chicken)_Rev+Unrev51565sequences_Jan2024	25	;intracellular ribonucleoprotein complex,cytosol	;	;mRNA binding	0.2866	0.0568	-0.2298	0.0246774	0.415615	0.0659549	0.0471938	0.277333	0.0867836	18.76	18.85	18.66	18.99	18.81	18.68	18.84	18.6	18.51	18.25	18.87	18.99	18.78	18.83	18.9	18.54	18.59	7465488	443357	473729	413598	520367	461072	418984	469302	397746	373249	312442	480100	522370	448767	466191
A0A8V0XE72	A0A8V0XE72_CHICK	EIF3A	Eukaryotic translation initiation factor 3 subunit A	Uniprot_Gallus-gallus(chicken)_Rev+Unrev51565sequences_Jan2024	131				0.0064	-0.2153	-0.2217	0.972509	0.198213	0.0910946	0.462992	0.176011	0.106529	18.96	18.98	18.71	18.96	18.82	18.74	18.74	18.81	18.78	18.18	18.64	18.86	18.85	18.87	17.97	18.7	18.63	7438893	509416	518627	429842	509291	462828	438379	438708	459324	450691	296725	408940	475880	471312	480067
A0A8V0ZTA5	A0A8V0ZTA5_CHICK	PEBP1	Phosphatidylethanolamine-binding protein 1	Uniprot_Gallus-gallus(chicken)_Rev+Unrev51565sequences_Jan2024	21				1.4516	2.8936	1.442	0.531031	0.402813	0.00248542	0.319036	0.272338	0.0139526	16.46	16.9	17.55	16.23	16.96	18.25	17.74	18.32	18.4	18.79	16.42	15.63	15.66	16.28	22.02	18.21	18.3	7424227	90352.2	122189	192467	77094.2	127683	310880	219524	326620	346540	453193	87676.3	50752.6	51880.4	79341.5
A0A8V0Y9P9	A0A8V0Y9P9_CHICK	ALDH9A1	4-trimethylaminobutyraldehyde dehydrogenase	Uniprot_Gallus-gallus(chicken)_Rev+Unrev51565sequences_Jan2024	25				-0.2746	0.1931	0.4677	0.307333	0.518217	0.0140374	0.231887	0.314551	0.0337452	18.44	18.66	18.81	18.17	18.41	18.93	18.64	19.1	19.24	18.92	18.63	18.35	18.38	18.41	19.44	18.56	18.62	7391054	355019	414735	458730	295086	348755	500705	409179	562546	619684	497074	404588	334720	340188	349008
A0A8V0XMI5;A0A8V0XTU1;Q9YH06	A0A8V0XMI5_CHICK;A0A8V0XTU1_CHICK;HMGB1_CHICK	HMGB1	High mobility group box 1;High mobility group box 1;High mobility group protein B1	Uniprot_Gallus-gallus(chicken)_Rev+Unrev51565sequences_Jan2024	24	;;condensed chromosome,extracellular space,cell,nucleus,cytoplasm,cell surface,transcriptional repressor complex,alphav-beta3 integrin-HMGB1 complex	;;activation of innate immune response,inflammatory response to antigenic stimulus,regulation of tolerance induction,positive regulation of cytosolic calcium ion concentration,regulation of autophagy,negative regulation of RNA polymerase II transcriptional preinitiation complex assembly,regulation of restriction endodeoxyribonuclease activity,DNA geometric change,positive regulation of mismatch r…	;;four-way junction DNA binding,bubble DNA binding,lipopolysaccharide binding,phosphatidylserine binding,damaged DNA binding,transcription factor activity, sequence-specific DNA binding,integrin binding,DNA binding, bending,lyase activity,C-X-C chemokine binding,non-sequence-specific DNA binding, bending,DNA polymerase binding,repressing transcription factor binding,supercoiled DNA binding,chroma…	0.6538	1.8992	1.2454	0.664297	0.397665	0.0287103	0.364676	0.270383	0.0515693	17.4	17.41	18.08	17.1	17.36	18.43	18.44	18.45	18.56	19.53	17.68	16.98	16.95	17.34	21.44	18.56	18.47	7374407	173140	174493	276376	140290	168600	353658	356027	359335	386378	756313	210061	128842	126838	166456
Q5ZJ54	TCPZ_CHICK	CCT6	T-complex protein 1 subunit zeta	Uniprot_Gallus-gallus(chicken)_Rev+Unrev51565sequences_Jan2024	34	chaperonin-containing T-complex	'de novo' protein folding,chaperone-mediated protein folding,toxin transport	ATP binding,protein binding involved in protein folding,unfolded protein binding	0.0224	0.0248	0.0024	0.846506	0.839122	0.965271	0.42487	0.422584	0.46083	18.69	18.7	18.74	18.62	18.9	18.72	18.68	18.8	18.78	18.7	18.79	18.82	18.89	18.92	18.28	18.57	18.51	7348520	423619	427009	436380	403688	490089	432814	419816	457475	449833	424526	454625	463729	484954	497665
A0A1D6UPS9	A0A1D6UPS9_CHICK	SF3B3	Splicing factor 3B subunit 3	Uniprot_Gallus-gallus(chicken)_Rev+Unrev51565sequences_Jan2024	59	nucleus		nucleic acid binding	1.0348	0.453	-0.5819	0.00125265	0.0259482	0.00484126	0.00982081	0.0486633	0.0192728	18.81	18.63	18.55	18.91	18.7	18.29	18.44	18.22	18.12	17.46	19.13	19.33	19.31	19.36	18.65	18.51	18.56	7342438	459935	404486	383444	492558	426805	320394	355602	305304	285769	180868	574978	656994	650125	672296
A0A1L1RIX9	A0A1L1RIX9_CHICK	NUDT16L1	Nudix hydrolase 16 like 1	Uniprot_Gallus-gallus(chicken)_Rev+Unrev51565sequences_Jan2024	13				-0.0728	0.0734	0.1462	0.83933	0.844914	0.17801	0.422663	0.424363	0.164213	18.48	18.65	18.61	18.87	18.75	18.76	19.01	18.88	18.86	18.56	18.98	19.15	19.14	18.93	14.98	18.34	18.57	7341737	364485	412622	399055	477464	442113	444243	526549	484023	477447	386916	516228	580048	578467	498145
A0A8V0XND8	A0A8V0XND8_CHICK	NEBL	Nebulette	Uniprot_Gallus-gallus(chicken)_Rev+Unrev51565sequences_Jan2024	83				-1.9144	-0.8816	1.0328	0.022496	0.09601	0.0749707	0.0446209	0.110287	0.0940498	18.65	18.26	18.44	18.36	18.59	18.91	19.48	18.84	19.35	20.36	16.85	16.79	17.07	16.76	18.94	18.7	18.67	7334858	410609	313458	354718	335910	393841	491566	728816	469329	668960	1.34159e+06	118395	113350	137514	110920
A0A8V1ACU4	A0A8V1ACU4_CHICK	GSN	Gelsolin	Uniprot_Gallus-gallus(chicken)_Rev+Unrev51565sequences_Jan2024	43				1.2813	0.3406	-0.9407	0.000106065	0.0130331	0.000542077	0.00315452	0.0322819	0.00656904	18.88	18.57	18.73	19.06	18.9	17.79	17.83	17.96	18.07	17.82	19.02	19.1	19.09	19.25	19.4	18.56	18.5	7281555	483516	388563	433687	546135	488834	226001	232454	254541	275097	231386	531939	561381	557895	621703
A0A286QZR1	A0A286QZR1_CHICK	prmt1	type I protein arginine methyltransferase	Uniprot_Gallus-gallus(chicken)_Rev+Unrev51565sequences_Jan2024	28				-0.1868	-0.0944	0.0924	0.553254	0.752805	0.530532	0.326748	0.394587	0.318864	18.73	18.83	18.72	18.78	18.49	18.87	18.66	18.85	19.15	18.4	18.96	18.76	18.9	18.89	16.43	18.67	18.57	7265341	435061	466648	431323	449236	368736	479123	413185	471289	582980	346767	509329	443089	490213	484156
P43347	TCTP_CHICK	TPT1	Translationally-controlled tumor protein homolog	Uniprot_Gallus-gallus(chicken)_Rev+Unrev51565sequences_Jan2024	13	extracellular space,nucleoplasm,cytoplasm,multivesicular body,cytosol,tubulin complex	stem cell population maintenance,cell differentiation,negative regulation of ectoderm development	calcium ion binding,microtubule binding,transcription factor binding	-0.2102	0.8081	1.0183	0.811919	0.524906	3.27483e-05	0.414209	0.31694	0.00185402	17.85	18.06	18.33	17.77	18.22	19.12	18.85	19	19.16	19.23	17.71	17.31	17.39	17.51	20.66	18.49	18.49	7261140	235793	272989	329147	223624	304332	571045	471185	523211	587530	613608	214723	162334	172271	186789
I3VQH4	I3VQH4_CHICK	ILF3	Interleukin enhancer binding factor 3-like protein	Uniprot_Gallus-gallus(chicken)_Rev+Unrev51565sequences_Jan2024	48				0.6116	0.3187	-0.293	0.169309	0.39222	0.0551161	0.159275	0.268137	0.0776153	18.66	18.6	18.55	18.93	18.68	18.52	18.65	18.47	18.31	17.93	19.2	19.36	19.31	19.23	16.59	18.52	18.58	7252582	415346	398526	384180	500379	418833	376190	412622	362933	326005	250402	602737	673290	651906	614346
Q5ZMG9	Q5ZMG9_CHICK	TCP1	T-complex protein 1 subunit alpha	Uniprot_Gallus-gallus(chicken)_Rev+Unrev51565sequences_Jan2024	43	pericentriolar material,acrosomal vesicle,zona pellucida receptor complex,nuclear heterochromatin,Golgi apparatus,chaperonin-containing T-complex,microtubule,myelin sheath,cell body	'de novo' protein folding,binding of sperm to zona pellucida,positive regulation of telomere maintenance via telomerase,translocation of peptides or proteins into host cell cytoplasm,protein stabilization,positive regulation of telomerase activity,chaperone-mediated protein folding,scaRNA localization to Cajal body,toxin transport,positive regulation of establishment of protein localization to te…	ATP binding,ubiquitin protein ligase binding,protein binding involved in protein folding,unfolded protein binding	-0.0242	-0.012	0.0122	0.832786	0.912929	0.823791	0.42073	0.445134	0.417933	18.69	18.72	18.67	18.68	18.82	18.74	18.65	18.81	18.85	18.61	18.77	18.8	18.83	18.82	18.24	18.51	18.59	7249600	424243	433295	417980	421396	463406	438782	411067	458063	470977	399765	447017	457133	466105	462157
P13538	MYSS_CHICK		Myosin heavy chain, skeletal muscle, adult	Uniprot_Gallus-gallus(chicken)_Rev+Unrev51565sequences_Jan2024	9	myofibril,myosin filament	microtubule-based movement	microtubule motor activity,calmodulin binding,ATP binding,microtubule binding,actin filament binding	2.8886	-1.6853	-4.574	0.000266236	0.00771968	0.00255501	0.00479597	0.0243444	0.0141195	20.38	19.61	19.28	19.44	19.93	13.62	15.94	14.58	15.64	15.23	17.58	18.12	18.28	18.01	18.38	19.11	18.87	7146932	1.36004e+06	799602	637411	713607	1.00108e+06	12563.4	62969.6	24427	51052.4	38416	195424	284332	317249	264047
A0A8V1AIX7	A0A8V1AIX7_CHICK	MYH1F	MYH1B protein	Uniprot_Gallus-gallus(chicken)_Rev+Unrev51565sequences_Jan2024	22				5.6404	-1.4559	-7.0963	0.000286817	0.0320989	0.00752378	0.00492787	0.0554626	0.0240292	20.2	19.3	18.44	20.34	20.16	13.15	12.59	12.68	13.29	11.34	17.99	18.52	18.64	18.53	18.15	18.26	18.53	7144984	1.20251e+06	646345	355736	1.32486e+06	1.17428e+06	9066.27	6158.3	6571.8	9982.72	2596.6	260459	376138	408260	378724
A0A1D5PSI2	A0A1D5PSI2_CHICK	IMPDH2	Inosine-5'-monophosphate dehydrogenase	Uniprot_Gallus-gallus(chicken)_Rev+Unrev51565sequences_Jan2024	30	nucleus,cytoplasm	GMP biosynthetic process,oxidation-reduction process	nucleotide binding,IMP dehydrogenase activity,metal ion binding	0.067	-0.1997	-0.2667	0.8363	0.505132	0.230643	0.421729	0.309878	0.193287	19.05	18.88	18.23	19.04	18.88	18.65	18.44	18.84	18.87	17.88	18.16	18.39	18.37	18.5	19.43	18.59	18.55	7137855	541714	482055	306937	540718	482158	411687	355940	469090	478690	240983	292222	343603	339221	370012
Q5ZMB8	Q5ZMB8_CHICK	PSMC2	26S proteasome regulatory subunit 7	Uniprot_Gallus-gallus(chicken)_Rev+Unrev51565sequences_Jan2024	32	proteasome regulatory particle, base subcomplex,nuclear proteasome complex,cytosolic proteasome complex,cytoplasmic ribonucleoprotein granule,dendritic spine	ER-associated ubiquitin-dependent protein catabolic process,positive regulation of RNA polymerase II transcriptional preinitiation complex assembly,positive regulation of proteasomal protein catabolic process	ATP binding,TBP-class protein binding,proteasome-activating ATPase activity	-0.1895	-0.4369	-0.2474	0.280568	0.0290022	0.00959683	0.21853	0.0519539	0.0274421	18.89	18.95	18.85	18.9	18.91	18.61	18.67	18.77	18.77	18.42	18.56	18.61	18.68	18.59	17.67	18.61	18.56	7107519	487476	506900	473105	488780	492556	401097	417188	445926	447279	351474	385800	399943	421014	393500
A0A8V0YI88;A0A8V0YI95;A0A8V0YIA0;A0A8V0YJ22;A0A8V0YJ27;A0A8V0YQX5	A0A8V0YI88_CHICK;A0A8V0YI95_CHICK;A0A8V0YIA0_CHICK;A0A8V0YJ22_CHICK;A0A8V0YJ27_CHICK;A0A8V0YQX5_CHICK	CRIP2	Cysteine-rich protein 2	Uniprot_Gallus-gallus(chicken)_Rev+Unrev51565sequences_Jan2024	21	;;;;;	;;;;;	;;;;;	-1.6364	-0.1967	1.4397	0.0769575	0.873297	0.0209518	0.0955531	0.432987	0.0427089	17.82	18.02	18.27	17.65	18.42	19.17	19.11	19.08	19.56	20.24	15.35	14.68	15.07	15.2	20.01	18.59	18.57	7073497	231191	266470	316355	206322	351719	591093	564925	553699	772776	1239286	41654.9	26321.9	34289.8	37525.6
E1BZ03	E1BZ03_CHICK	CAP2	Adenylyl cyclase-associated protein	Uniprot_Gallus-gallus(chicken)_Rev+Unrev51565sequences_Jan2024	38	postsynaptic density,cortical actin cytoskeleton	cell morphogenesis,establishment or maintenance of cell polarity,signal transduction,actin polymerization or depolymerization,regulation of adenylate cyclase activity	actin binding,adenylate cyclase binding,identical protein binding	-1.0351	-1.0388	-0.0037	5.93259e-05	2.16438e-05	0.963154	0.00243682	0.00151978	0.460264	18.95	18.87	19	18.98	18.93	18.99	18.88	19.11	19.02	18.68	17.96	17.95	18.14	17.93	17.47	18.6	18.6	7072482	506377	480328	523555	516885	499855	519229	483835	567251	531698	418586	255599	252548	289708	250085
A0A8V1AEW4	A0A8V1AEW4_CHICK	TUBB4B	Tubulin beta chain	Uniprot_Gallus-gallus(chicken)_Rev+Unrev51565sequences_Jan2024	4				-2.67	-0.1797	2.4903	0.00611301	0.326734	0.00699406	0.0216179	0.24044	0.0232555	17.35	17.47	17.3	17.29	17.34	19.54	19.18	19.77	19.86	20.51	16.75	16.94	17.68	17.05	17.27	18.42	18.64	7034273	166930	181359	161487	160599	166091	763394	593889	894138	954846	1.49393e+06	110081	125442	209735	135250
E1C852	E1C852_CHICK	PDLIM1	PDZ and LIM domain 1	Uniprot_Gallus-gallus(chicken)_Rev+Unrev51565sequences_Jan2024	27				0.1481	0.3049	0.1568	0.724072	0.479898	0.414569	0.384772	0.301045	0.276901	18.34	18.48	18.69	18.44	18.65	18.54	18.75	18.39	18.41	19.17	18.62	18.21	18.44	18.43	19.8	18.37	18.49	7022749	330828	365919	423397	354578	410219	381256	439758	343966	347235	589077	403591	302788	355397	352813
F2Z4M0;Q9W7I5	F2Z4M0_CHICK;RBBP4_CHICK	RBBP4	RB binding protein 4, chromatin remodeling factor;Histone-binding protein RBBP4	Uniprot_Gallus-gallus(chicken)_Rev+Unrev51565sequences_Jan2024	28	cytosol,NuRD complex,NURF complex,CAF-1 complex,ESC/E(Z) complex;nucleus,CAF-1 complex,ESC/E(Z) complex	DNA replication-dependent nucleosome assembly,DNA replication-independent nucleosome assembly,chromatin remodeling;DNA replication,chromatin remodeling,transcription, DNA-templated,regulation of transcription, DNA-templated,cell cycle,chromatin assembly	DNA-dependent ATPase activity,histone deacetylase binding;DNA-dependent ATPase activity	0.0108	0.0194	0.0086	0.917006	0.81215	0.91961	0.446291	0.414301	0.44711	18.55	18.67	18.61	18.74	18.73	18.73	18.7	18.72	18.79	18.35	18.71	18.6	18.52	18.63	18.91	18.52	18.52	7003241	382495	416314	400851	436906	433804	434648	426953	432667	454351	334116	428998	396740	374854	405431
P17153	ANXA5_CHICK	ANXA5	Annexin A5	Uniprot_Gallus-gallus(chicken)_Rev+Unrev51565sequences_Jan2024	38	vesicle,calcium channel complex	negative regulation of coagulation,calcium ion homeostasis,calcium ion transmembrane transport	calcium channel activity,calcium ion binding,protein binding,calcium-dependent phospholipid binding	0.3193	1.1953	0.876	0.706927	0.314194	0.00993398	0.379198	0.234923	0.0279666	17.43	17.94	18.56	17.08	18.05	18.73	18.16	18.85	18.92	19.07	18.57	17.91	17.93	18.05	20.65	18.45	18.39	6979367	177038	250932	385915	138701	272145	434082	293232	473360	496874	550203	389809	246250	249201	270630
A0A8V0YRG7;F1NKL4	A0A8V0YRG7_CHICK;F1NKL4_CHICK	DYNC1H1	Dynein cytoplasmic 1 heavy chain 1	Uniprot_Gallus-gallus(chicken)_Rev+Unrev51565sequences_Jan2024	334	;cytoplasm,centrosome,cytoplasmic dynein complex,microtubule,filopodium,dynein complex	;cytoplasmic microtubule organization,positive regulation of intracellular transport,cytoplasmic mRNA processing body assembly,stress granule assembly,establishment of spindle localization,regulation of mitotic spindle organization,minus-end-directed vesicle transport along microtubule,regulation of metaphase plate congression,Requires Ontology,microtubule-based movement	;ATP binding,ATP-dependent microtubule motor activity, minus-end-directed,dynein light chain binding,dynein intermediate chain binding,dynein light intermediate chain binding	0.2769	-0.2985	-0.5754	0.169363	0.0827886	0.000535693	0.159305	0.10029	0.00652969	18.97	18.98	18.69	19.02	18.89	18.34	18.3	18.47	18.55	17.97	18.59	18.8	18.81	18.77	17.93	18.56	18.49	6891790	513553	518453	421875	531052	485971	331041	322258	363847	383478	257550	395624	455079	459885	448294
Q5ZLX2	IF2A_CHICK	EIF2S1	Eukaryotic translation initiation factor 2 subunit 1	Uniprot_Gallus-gallus(chicken)_Rev+Unrev51565sequences_Jan2024	33	cytoplasm,ribosome,eukaryotic translation initiation factor 2 complex,eukaryotic translation initiation factor 2B complex,cytoplasmic stress granule,eukaryotic 48S preinitiation complex,multi-eIF complex	translational initiation,negative regulation of translational initiation in response to stress,cellular response to amino acid starvation,cellular response to UV,response to endoplasmic reticulum stress	translation initiation factor activity,ribosome binding,poly(A) RNA binding	-0.1296	-0.0748	0.0548	0.597438	0.759539	0.417747	0.341762	0.396825	0.278179	18.53	18.65	18.72	18.62	18.73	18.8	18.74	18.76	18.72	18.49	18.78	18.77	18.83	18.79	17.09	18.4	18.57	6884915	377685	411737	432450	402662	433624	454842	437717	444628	432480	368121	449803	445845	464468	454237
O93277	WDR1_CHICK	WDR1	WD repeat-containing protein 1	Uniprot_Gallus-gallus(chicken)_Rev+Unrev51565sequences_Jan2024	45	cortical actin cytoskeleton,actomyosin, actin portion	actin filament depolymerization,positive regulation of actin filament depolymerization,locomotion,sarcomere organization	actin filament binding	0.1175	0.4717	0.3541	0.899352	0.654866	0.0527395	0.440802	0.361729	0.075494	18.25	18.45	18.6	18.16	18.28	18.95	18.44	18.81	18.88	18.37	17.82	17.43	17.46	17.6	20.55	18.46	18.48	6872843	310876	358538	397637	292009	317916	505829	354580	460145	483568	339428	230916	176733	180549	198785
A0A8V0YNX2;P08285	A0A8V0YNX2_CHICK;H103_CHICK		H15 domain-containing protein;Histone H1.03	Uniprot_Gallus-gallus(chicken)_Rev+Unrev51565sequences_Jan2024	3	;nucleosome,nucleus	;nucleosome assembly	;DNA binding	0.7533	0.7383	-0.015	0.05163	0.0555429	0.912223	0.0744148	0.0779659	0.444946	18.28	18.18	18.36	18.47	18.47	18.6	18.59	18.14	18.28	18.01	19.06	18.82	18.88	18.69	19.76	18.38	18.5	6857359	319246	297912	336642	362371	363550	398268	394077	289299	317613	263068	548037	463164	480798	422174
P04264	SWISS-PROT:P04264		Tax_Id=9606 Gene_Symbol=KRT1 Keratin, type II cytoskeletal 1	contaminants_mq1,6_headersForSpectronaut	39				2.2678	2.0277	-0.2402	0.165616	0.18202	0.498518	0.156959	0.166634	0.307547	17.99	16.57	17.95	17.62	17.81	18.16	16.57	16.96	17.62	17.32	18.31	18.62	18.29	21.19	19.61	18.41	18.33	6850139	260129	97619.1	253062	200904	230089	293182	97151.8	127571	201046	163095	323970	404139	320590	2398840
A0A8V0XGH4	A0A8V0XGH4_CHICK	PDIA6	Protein disulfide-isomerase A6	Uniprot_Gallus-gallus(chicken)_Rev+Unrev51565sequences_Jan2024	21				0.2485	0.3029	0.0544	0.361955	0.273045	0.716738	0.256052	0.215086	0.382512	18.45	18.26	18.59	18.39	18.77	18.79	18.6	18.75	18.15	18.4	19.07	18.89	19.04	18.99	17.58	18.53	18.61	6850006	357310	313202	394162	344413	446695	453004	397203	439965	291459	345424	549190	484865	538068	521598
P84173	PHB1_CHICK	PHB1	Prohibitin 1	Uniprot_Gallus-gallus(chicken)_Rev+Unrev51565sequences_Jan2024	19	nucleoplasm,mitochondrial inner membrane,early endosome,integral component of plasma membrane,cell surface,myelin sheath	negative regulation of transcription from RNA polymerase II promoter,mitochondrion organization,negative regulation of cell proliferation,positive regulation of cell death,negative regulation of transcription by competitive promoter binding,histone deacetylation,negative regulation of cell growth,negative regulation of protein catabolic process,positive regulation of G-protein coupled receptor pr…	RNA polymerase II transcription factor activity, sequence-specific DNA binding,complement component C3a binding,complement component C3b binding,protein binding,protein C-terminus binding,proteinase activated receptor binding,histone deacetylase binding,transcription regulatory region DNA binding	-1.0246	1.7947	2.8193	0.296891	0.0142723	0.110689	0.226481	0.0340285	0.121086	17.07	16.16	16.45	16.7	16.9	18.63	18.99	18.25	18.94	20.93	18.23	18.84	18.65	18.93	17.15	18.49	18.31	6790213	137501	73169.6	89486.7	106219	122688	405511	520088	312169	502711	1.99368e+06	307842	469008	412475	500374
Q5ZJK8	TCPH_CHICK	CCT7	T-complex protein 1 subunit eta	Uniprot_Gallus-gallus(chicken)_Rev+Unrev51565sequences_Jan2024	46	chaperonin-containing T-complex	'de novo' protein folding,chaperone-mediated protein folding	ATP binding,protein binding involved in protein folding,unfolded protein binding	-0.0167	0.001	0.0177	0.909129	0.994333	0.774945	0.443989	0.469318	0.402101	18.65	18.6	18.53	18.6	18.71	18.67	18.56	18.76	18.7	18.47	18.7	18.74	18.79	18.75	17.98	18.42	18.47	6785725	410228	397706	379101	397858	430048	416499	387697	445330	426144	364095	425534	436775	454351	440716
P13127	CAZA1_CHICK	CAPZA1	F-actin-capping protein subunit alpha-1	Uniprot_Gallus-gallus(chicken)_Rev+Unrev51565sequences_Jan2024	16	cytosol,plasma membrane,F-actin capping protein complex,Z disc,WASH complex	cell junction assembly,barbed-end actin filament capping	actin binding,protein binding	0.4868	0.068	-0.4188	0.00062814	0.531717	0.0151833	0.00702491	0.319316	0.0353089	18.83	18.58	18.37	18.91	18.82	18.18	18.05	18.31	18.54	18.34	18.74	18.71	18.75	18.94	18.75	18.46	18.45	6734635	465420	391718	338857	492505	463022	297886	272116	325644	381402	332351	439291	429861	441697	502695
A0A8V0ZJT8;F1P180	A0A8V0ZJT8_CHICK;F1P180_CHICK	GOT2	Aspartate aminotransferase	Uniprot_Gallus-gallus(chicken)_Rev+Unrev51565sequences_Jan2024	37	;mitochondrial inner membrane,plasma membrane,myelin sheath	;oxaloacetate metabolic process,aspartate biosynthetic process,aspartate catabolic process,fatty acid transport,glutamate catabolic process to aspartate,glutamate catabolic process to 2-oxoglutarate,response to ethanol	;L-aspartate:2-oxoglutarate aminotransferase activity,pyridoxal phosphate binding	0.24	0.5722	0.3322	0.779526	0.541573	0.388364	0.403616	0.322831	0.266557	18.62	18.25	18.33	18.41	17.76	18.34	18.15	19.49	18.26	18.45	17.62	18.07	18.02	17.88	20.43	18.31	18.42	6718173	403561	310748	329442	347484	222056	330764	291338	736720	312911	359308	201994	274577	265005	240809
A0A1L1RRQ2;A0A8V0XD12;Q5ZHW3	A0A1L1RRQ2_CHICK;A0A8V0XD12_CHICK;Q5ZHW3_CHICK	BUB3;BUB3;RCJMB04_32k7	Mitotic checkpoint protein BUB3	Uniprot_Gallus-gallus(chicken)_Rev+Unrev51565sequences_Jan2024	21	;;	;;	;;	0.2558	0.3364	0.0806	0.565421	0.46462	0.476243	0.330942	0.295862	0.299951	18.28	18.49	18.62	18.37	18.52	18.78	18.43	18.57	18.61	18.26	18.52	18.26	18.44	18.26	19.81	18.46	18.44	6708604	318241	368843	403813	337848	376308	451681	352267	389099	401060	314712	375503	314553	355434	312969
A0A8V0YW10	A0A8V0YW10_CHICK	PRPS1L1	Ribose-phosphate pyrophosphokinase 1	Uniprot_Gallus-gallus(chicken)_Rev+Unrev51565sequences_Jan2024	24				-0.5879	-0.5737	0.0142	0.044314	0.0494804	0.895467	0.067612	0.0725243	0.439795	18.72	18.89	19	18.58	18.61	18.8	18.55	18.91	18.91	18.72	18.59	18.44	18.34	18.32	16.5	18.43	18.42	6694770	431880	486132	524072	392783	399418	457375	383864	491079	493354	430754	394388	355674	331750	326917
A0A8V0YJW4	A0A8V0YJW4_CHICK	PREP	Prolyl endopeptidase	Uniprot_Gallus-gallus(chicken)_Rev+Unrev51565sequences_Jan2024	59				0.4008	1.4465	1.0457	0.760691	0.441183	0.00559739	0.397231	0.287024	0.0207446	17.34	17.94	18.07	17.09	17.67	18.82	18.19	18.77	19.13	18.48	17.49	16.96	16.94	17.22	21.1	18.37	18.31	6689115	165775	251563	275251	139454	208675	463447	298240	445498	575015	366203	183516	127369	125907	152672
A0A8V1AG21	A0A8V1AG21_CHICK	NES	Nestin	Uniprot_Gallus-gallus(chicken)_Rev+Unrev51565sequences_Jan2024	85				0.5757	2.4397	1.864	0.542712	0.165529	0.0254238	0.32319	0.156909	0.0480597	17.1	16.69	16.86	16.71	16.89	18.27	18.8	18.33	18.14	19.57	18.09	18.21	18.37	18.69	20.84	18.42	18.37	6670670	140851	105825	118712	107299	121770	316211	454974	328554	288000	776154	278960	302351	338000	422190
E1BTT8	E1BTT8_CHICK	LDHA	L-lactate dehydrogenase	Uniprot_Gallus-gallus(chicken)_Rev+Unrev51565sequences_Jan2024	26	cytoplasm	carbohydrate metabolic process,carboxylic acid metabolic process,oxidation-reduction process	L-lactate dehydrogenase activity	-0.1503	-0.3101	-0.1598	0.879147	0.743392	0.442837	0.434716	0.391314	0.287499	18.56	18.76	19.21	18.27	18.88	18.36	18.27	18.74	18.79	18.8	17.31	16.51	16.78	16.65	20.34	18.17	18.34	6662865	385695	445353	605044	315942	481914	335652	315087	438359	453163	457467	163025	93427.2	112483	102888
A0A8V0ZQ22;A0A8V0ZQ29	A0A8V0ZQ22_CHICK;A0A8V0ZQ29_CHICK	EIF4B	Eukaryotic translation initiation factor 4B	Uniprot_Gallus-gallus(chicken)_Rev+Unrev51565sequences_Jan2024	50	;	;	;	0.3454	0.6966	0.3512	0.692442	0.482693	0.118598	0.374262	0.301947	0.126393	18.24	18.16	18.36	18.08	18.23	18.4	18.59	18.3	18.32	19.07	18.13	17.93	17.63	17.97	20.49	18.44	18.48	6644664	310235	291956	335685	276349	306552	346131	394831	321714	328157	549082	287094	249619	202849	257209
P02604	MLE1_CHICK		Myosin light chain 1, skeletal muscle isoform	Uniprot_Gallus-gallus(chicken)_Rev+Unrev51565sequences_Jan2024	22	myosin complex,myofibril	muscle contraction,regulation of myosin II filament assembly	calcium ion binding	3.3204	1.8297	-1.4906	0.148204	0.227169	0.0407055	0.145858	0.191609	0.0640937	17.92	17.05	16.95	18.65	18.25	15.43	16.04	15.43	16.17	17.68	18.39	18.57	18.83	19.07	21.33	18.01	18.21	6629666	248812	135874	126578	411113	312447	44225.1	67178.7	44283.2	73921.1	209807	344254	390460	466404	549440
A0A8V1A2V3	A0A8V1A2V3_CHICK	SMARCC2	SWI/SNF related, matrix associated, actin dependent regulator of chromatin subfamily c member 2	Uniprot_Gallus-gallus(chicken)_Rev+Unrev51565sequences_Jan2024	56				0.6148	0.2405	-0.3743	3.89137e-05	0.00525722	0.000704428	0.00202217	0.0200886	0.00741953	18.5	18.65	18.72	18.54	18.59	18.32	18.21	18.18	18.37	18.02	18.81	18.83	18.81	18.74	19.01	18.42	18.35	6559545	370683	410362	431099	381831	395671	327998	304231	297792	339676	265240	459410	467383	458662	438450
Q5ZK88	PSPC1_CHICK	PSPC1	Paraspeckle component 1	Uniprot_Gallus-gallus(chicken)_Rev+Unrev51565sequences_Jan2024	32	fibrillar center,nucleus,cytoplasm,nuclear matrix,nuclear speck,paraspeckles	mRNA splicing, via spliceosome,activation of innate immune response,transcription, DNA-templated,regulation of transcription, DNA-templated,regulation of circadian rhythm,negative regulation of transcription, DNA-templated,rhythmic process	transcription regulatory region sequence-specific DNA binding,core promoter binding,RNA binding,nucleic acid binding	0.3212	0.1099	-0.2112	0.0098537	0.241596	0.0266685	0.0278455	0.198771	0.0494685	18.53	18.57	18.78	18.53	18.54	18.35	18.55	18.27	18.24	18.48	18.82	18.6	18.6	18.57	18.89	18.43	18.54	6551913	377855	388496	451423	377676	381366	333287	382909	316365	310632	364399	462242	396551	397068	390302
F1NZ86	F1NZ86_CHICK	HSPA9	Stress-70 protein, mitochondrial	Uniprot_Gallus-gallus(chicken)_Rev+Unrev51565sequences_Jan2024	51	mitochondrial nucleoid,myelin sheath	protein folding,protein export from nucleus,iron-sulfur cluster assembly,erythrocyte differentiation,negative regulation of erythrocyte differentiation,negative regulation of hematopoietic stem cell differentiation	ATP binding,ubiquitin protein ligase binding,unfolded protein binding	-0.1526	0.0653	0.2179	0.674445	0.857883	0.524243	0.368094	0.428549	0.316678	19.06	18.2	18.02	18.77	17.93	18.32	18.56	19.32	18.04	18.83	17.76	18.51	18.41	18.25	19.29	18.52	18.44	6541473	544842	301950	265733	448402	249490	327282	386624	656626	269300	465805	222294	373675	347799	311648
A0A8V0ZA25;P32046	A0A8V0ZA25_CHICK;RL37A_CHICK	RPL37A	Ribosomal protein L37a;Large ribosomal subunit protein eL43	Uniprot_Gallus-gallus(chicken)_Rev+Unrev51565sequences_Jan2024	7	;ribosome	;translation	;structural constituent of ribosome,metal ion binding	0.1258	-0.1828	-0.3087	0.536859	0.374496	0.0485796	0.321136	0.261246	0.0716726	19.02	18.66	18.43	18.78	18.63	18.44	18.41	18.25	18.29	18.62	18.21	18.37	18.54	18.29	19.07	18.63	18.41	6539844	532088	413851	352177	449156	405440	356765	347967	311887	319496	401958	303029	339636	381359	320640
R4GM85	R4GM85_CHICK	HSPB7L	Uncharacterized protein	Uniprot_Gallus-gallus(chicken)_Rev+Unrev51565sequences_Jan2024	11				-1.5418	-0.746	0.7957	0.0758525	0.000201661	0.199493	0.0946738	0.00424182	0.17674	18.45	18.18	18.61	18.39	18.4	18.59	19.19	18.42	18.73	20.26	17.52	17.52	17.76	17.62	17.87	18.4	18.48	6524953	358001	297915	399918	343414	345493	394302	597736	350253	433730	1.25278e+06	188587	188497	221873	201776
F1NPD3	F1NPD3_CHICK	RPL18A	60S ribosomal protein L18a	Uniprot_Gallus-gallus(chicken)_Rev+Unrev51565sequences_Jan2024	17	cytosolic large ribosomal subunit			-2.1796	-1.2127	0.9668	1.8188e-06	0.00195931	8.17228e-05	0.000534973	0.0124079	0.00278568	18.48	18.07	18.04	18.4	18.75	19.4	19.17	19.29	19.26	19.55	17.23	17.43	17.73	17.07	15.52	18.44	18.55	6490975	366269	275980	269460	345589	441701	693078	590300	640235	628672	768484	154020	176369	218100	137601
F1NY54	F1NY54_CHICK	THRAP3	Thyroid hormone receptor associated protein 3	Uniprot_Gallus-gallus(chicken)_Rev+Unrev51565sequences_Jan2024	57	mediator complex,nuclear speck,exon-exon junction complex	regulation of alternative mRNA splicing, via spliceosome,nuclear-transcribed mRNA catabolic process,transcription initiation from RNA polymerase II promoter,circadian rhythm,RNA splicing,androgen receptor signaling pathway,positive regulation of circadian rhythm,positive regulation of transcription from RNA polymerase II promoter,positive regulation of mRNA splicing, via spliceosome,mRNA stabiliz…	core promoter sequence-specific DNA binding,RNA polymerase II transcription cofactor activity,transcription coactivator activity,receptor activity,thyroid hormone receptor binding,phosphoprotein binding	1.1478	0.6114	-0.5364	0.0134909	0.0637475	0.00458709	0.0329587	0.0850907	0.0187987	18.55	18.32	18.33	18.62	18.42	17.88	18.32	17.85	17.52	17.9	18.84	18.93	18.78	18.86	19.69	18.43	18.34	6463026	384852	327338	328847	403779	351126	241910	327810	236694	187552	244328	470784	499629	449280	476895
A0A8V0ZTR7	A0A8V0ZTR7_CHICK	ARHGAP1	Rho GTPase activating protein 1	Uniprot_Gallus-gallus(chicken)_Rev+Unrev51565sequences_Jan2024	36				-1.6952	-0.7846	0.9106	8.43774e-05	0.0315432	0.000349787	0.00283861	0.0548545	0.00544226	18.19	18.37	18.67	18.16	18.29	19.02	19.26	19.26	19.53	19.16	18	17.82	17.78	17.82	14.08	18.27	18.39	6424059	298218	337887	416924	293381	319402	530877	628966	628426	756544	586731	262916	231487	224666	230640
Q9PTR5	LIS1_CHICK	PAFAH1B1	Lissencephaly-1 homolog	Uniprot_Gallus-gallus(chicken)_Rev+Unrev51565sequences_Jan2024	34	astral microtubule,kinetochore,nuclear envelope,centrosome,microtubule,microtubule associated complex,cell cortex,cell leading edge,motile cilium,stereocilium,perinuclear region of cytoplasm,axon cytoplasm	establishment of mitotic spindle orientation,ameboidal-type cell migration,acrosome assembly,neuron migration,positive regulation of cytokine-mediated signaling pathway,nuclear migration,chemical synaptic transmission,germ cell development,neuroblast proliferation,learning or memory,retrograde axonal transport,adult locomotory behavior,protein secretion,transmission of nerve impulse,corpus callos…	microtubule binding,protein homodimerization activity,phosphoprotein binding,dynein complex binding	0.5399	0.5627	0.0229	0.577061	0.56402	0.853586	0.33508	0.330466	0.427231	18.26	18.43	18.51	18.1	18.3	18.48	18.04	18.44	18.56	18.16	18.06	17.75	17.8	17.77	20.5	18.38	18.34	6412122	314289	352161	373265	280413	323454	365662	269902	354835	386419	293017	273976	220469	228049	223071
A0A8V0YGM0;A0A8V0YIP4;Q5ZMW1	A0A8V0YGM0_CHICK;A0A8V0YIP4_CHICK;Q5ZMW1_CHICK	ACO2	Aconitase 2;Aconitase 2;Aconitate hydratase, mitochondrial	Uniprot_Gallus-gallus(chicken)_Rev+Unrev51565sequences_Jan2024	54	;;mitochondrion	;;tricarboxylic acid cycle	;;aconitate hydratase activity,4 iron, 4 sulfur cluster binding	-0.0932	0.4277	0.5209	0.913432	0.666761	0.180741	0.445307	0.365553	0.165841	18.58	18.2	18.3	18.16	17.69	18.35	18.14	19.46	18.37	18.93	17.25	17.67	17.57	17.44	20.32	18.29	18.34	6402138	392458	301600	323489	291987	211453	333928	288770	723539	338134	497948	156081	208854	194500	178323
Q5F491	Q5F491_CHICK	RCJMB04_2a4	RNA helicase	Uniprot_Gallus-gallus(chicken)_Rev+Unrev51565sequences_Jan2024	54			nucleic acid binding,helicase activity,ATP binding	-0.2185	-0.0826	0.1359	0.51136	0.801718	0.275951	0.312115	0.411054	0.21657	18.55	18.47	18.46	18.67	18.39	18.81	18.78	18.75	18.58	18.24	18.67	18.74	18.75	18.69	15.5	18.46	18.38	6389402	383532	364318	361216	416172	344241	459717	451280	441432	392438	309229	415795	438014	441944	423304
A0A1L1RKB7;Q03669	A0A1L1RKB7_CHICK;AT2A2_CHICK	ATP2A2	Calcium-transporting ATPase;Sarcoplasmic/endoplasmic reticulum calcium ATPase 2	Uniprot_Gallus-gallus(chicken)_Rev+Unrev51565sequences_Jan2024	51	integral component of membrane;integral component of membrane,sarcoplasmic reticulum membrane	calcium ion transmembrane transport,Requires Ontology;calcium ion transport,response to drug,calcium ion transmembrane transport,Requires Ontology,cellular calcium ion homeostasis	calcium-transporting ATPase activity,ATP binding;calcium-transporting ATPase activity,ATP binding,metal ion binding,hydrogen-exporting ATPase activity, phosphorylative mechanism	1.9711	0.0655	-1.9056	0.00563456	0.849351	0.016773	0.0207788	0.425797	0.0374833	19.07	18.5	17.63	19.42	19.3	16.94	17.23	17.06	16.72	17.06	18.46	19.19	19.33	19.3	18.31	18.24	18.25	6347412	550793	371227	203021	703547	646078	125594	154214	136819	107620	136259	361749	597175	658713	646410
Q5XNV3	Q5XNV3_CHICK	CAPRIN1	Cell cycle associated protein 1	Uniprot_Gallus-gallus(chicken)_Rev+Unrev51565sequences_Jan2024	29	cytoplasmic stress granule	positive regulation of dendritic spine morphogenesis		0.1848	0.3118	0.127	0.640245	0.452556	0.257433	0.3566	0.291269	0.207151	18.39	18.33	18.29	18.44	18.39	18.45	18.68	18.28	18.31	18.71	18.35	18.22	18.34	18.29	19.63	18.42	18.38	6340190	343648	329971	320741	356854	343715	357314	419799	317942	326043	429818	333110	305155	332311	319965
D5LPR1	D5LPR1_CHICK	FSCN1	Fascin	Uniprot_Gallus-gallus(chicken)_Rev+Unrev51565sequences_Jan2024	45	microvillus,growth cone,cytoplasm,cell projection membrane,filamentous actin,filopodium,lamellipodium,ruffle	cell migration,actin filament bundle assembly,establishment or maintenance of cell polarity,anatomical structure morphogenesis	actin filament binding	0.6649	1.967	1.3021	0.66023	0.392489	0.00365605	0.363364	0.268295	0.0169084	17.18	17.44	17.51	16.7	17.29	18.65	17.97	18.72	18.91	18.31	17.35	16.85	16.78	17.15	21.26	18.21	18.15	6339961	148307	178210	186186	106448	160109	412449	257637	433083	493202	325241	167098	118218	112831	145806
A0A8V0ZZ05	A0A8V0ZZ05_CHICK	NPEPPS	Aminopeptidase	Uniprot_Gallus-gallus(chicken)_Rev+Unrev51565sequences_Jan2024	64				0.4967	1.204	0.7073	0.705181	0.473235	0.00942963	0.378616	0.298945	0.0271275	17.58	17.97	18.23	17.28	17.82	18.59	18.04	18.65	18.83	18.36	17.49	17.02	17.07	17.2	20.96	18.19	18.17	6277304	195766	257432	306622	159633	232140	394458	270160	412476	465920	337186	184651	132975	137685	150937
F1NC02	F1NC02_CHICK	PSMA4	Proteasome subunit alpha type	Uniprot_Gallus-gallus(chicken)_Rev+Unrev51565sequences_Jan2024	18	cytoplasmic mRNA processing body,nucleus,cytosol,proteasome core complex, alpha-subunit complex,proteasome core complex,cytoplasm	ubiquitin-dependent protein catabolic process,proteasome-mediated ubiquitin-dependent protein catabolic process,proteasomal protein catabolic process,proteasomal ubiquitin-independent protein catabolic process	threonine-type endopeptidase activity,endopeptidase activity	0.8152	0.7038	-0.1114	0.365907	0.413416	0.173379	0.257726	0.27649	0.161592	18.26	18.3	18.35	18.2	18.23	18.2	18.23	18.21	18.26	17.86	18.17	18.09	18.22	18.24	20.4	18.15	18.25	6221232	313222	323391	334800	301945	307324	300535	306780	302636	314903	238402	293960	279744	305465	308955
A0A1D5PXH0;A0A8V0WZY4;A0A8V0X519	A0A1D5PXH0_CHICK;A0A8V0WZY4_CHICK;A0A8V0X519_CHICK	AP1B1	AP complex subunit beta	Uniprot_Gallus-gallus(chicken)_Rev+Unrev51565sequences_Jan2024	52	clathrin adaptor complex;;	intracellular protein transport,vesicle-mediated transport;;	clathrin binding;;	0.398	-0.0686	-0.4666	0.283313	0.811685	0.00517376	0.2199	0.414145	0.0199345	18.65	18.66	18.62	18.72	18.67	18.37	18.3	18.28	18.21	17.73	18.81	18.87	18.93	18.76	16.54	18.27	18.4	6215368	410178	413564	403949	430490	415958	339353	322958	318185	303396	217122	460928	480139	498846	442475
A0A8V0XAV4	A0A8V0XAV4_CHICK	ESD	S-formylglutathione hydrolase	Uniprot_Gallus-gallus(chicken)_Rev+Unrev51565sequences_Jan2024	18				0.9943	1.9238	0.9295	0.567129	0.408864	0.00427917	0.331539	0.274783	0.0181583	17.12	17.51	17.82	16.65	17.41	18.29	17.7	18.26	18.59	18.43	17.34	16.79	16.7	16.95	21.35	18.16	18.11	6182465	142189	186368	231086	102940	174619	320391	212813	314593	394536	352235	166009	113200	106571	126324
A0A8V0ZIW3;P79994	A0A8V0ZIW3_CHICK;P79994_CHICK	TOP1;	DNA topoisomerase I	Uniprot_Gallus-gallus(chicken)_Rev+Unrev51565sequences_Jan2024	54	;	;	;	0.6124	0.4458	-0.1665	0.0248851	0.0602204	0.229166	0.0473976	0.0819233	0.192658	18.19	18.3	18.39	18.43	18.48	18.53	18.17	18.18	18.24	17.77	18.96	18.97	18.95	18.91	18.04	18.35	18.29	6134923	298925	322581	344168	354224	365214	377925	294523	297070	308897	223007	509422	514381	508157	493526
A0A1D5P8I7;Q5ZL82	A0A1D5P8I7_CHICK;Q5ZL82_CHICK	IDH2;RCJMB04_7e11	Isocitrate dehydrogenase [NADP]	Uniprot_Gallus-gallus(chicken)_Rev+Unrev51565sequences_Jan2024	34	;	tricarboxylic acid cycle,isocitrate metabolic process;	magnesium ion binding,isocitrate dehydrogenase (NADP+) activity,NAD binding;	-0.4286	0.0457	0.4743	0.506916	0.946278	0.219212	0.310539	0.455191	0.187685	18.68	18.24	18.48	18.09	17.71	18.35	18.14	19.4	18.24	19.15	17.37	17.61	17.68	17.42	19.75	18.42	18.39	6125823	419955	310403	365139	278271	213954	334180	289028	690426	310444	581730	169846	200529	209387	175272
A0A3Q2UI94	A0A3Q2UI94_CHICK	SORBS2	Sorbin and SH3 domain containing 2	Uniprot_Gallus-gallus(chicken)_Rev+Unrev51565sequences_Jan2024	59				-2.2049	0.6405	2.8454	0.0620574	0.149988	0.0481163	0.0835026	0.146984	0.0712869	17.02	16.4	16.92	16.46	16.82	19	19.5	18.69	19.01	20.73	17.07	17.14	17.08	16.96	18.23	18.51	18.45	6084933	132660	86694.9	123588	90310.5	116025	522537	741770	422344	527640	1.73327e+06	137671	144665	138328	127502
A0A8V0ZNG4;A0A8V0ZX59;O42265	A0A8V0ZNG4_CHICK;A0A8V0ZX59_CHICK;PSA1_CHICK	PSMA1	Proteasome subunit alpha 1;Proteasome subunit alpha 1;Proteasome subunit alpha type-1	Uniprot_Gallus-gallus(chicken)_Rev+Unrev51565sequences_Jan2024	25	;;nucleus,cytoplasm,proteasome core complex,proteasome core complex, alpha-subunit complex	;;ubiquitin-dependent protein catabolic process,proteasomal ubiquitin-independent protein catabolic process,proteasome-mediated ubiquitin-dependent protein catabolic process,proteasomal protein catabolic process	;;threonine-type endopeptidase activity,endopeptidase activity	0.7825	0.6806	-0.1019	0.319608	0.365667	0.166467	0.237451	0.257637	0.157431	18.05	18.33	18.32	18.16	18.3	18.08	18.15	18.11	18.26	18.07	18.27	18.21	18.21	18.33	20.22	18.13	18.2	6045307	270752	329756	328084	293163	322472	276736	290048	282768	313715	275670	315064	302186	303040	330267
A0A8V0Z109	A0A8V0Z109_CHICK	ADD1	Adducin 1	Uniprot_Gallus-gallus(chicken)_Rev+Unrev51565sequences_Jan2024	50				0.5236	-0.2051	-0.7287	0.000124159	0.00747936	1.2266e-06	0.00338225	0.0239431	0.000496625	18.76	18.81	18.61	18.71	18.74	17.98	18.14	18.01	18	17.85	18.53	18.62	18.55	18.56	18.33	18.41	18.28	6031007	443765	458702	399471	429649	438772	258842	289331	263108	262437	236016	377686	403641	384258	387633
P02542	DESM_CHICK	DES	Desmin	Uniprot_Gallus-gallus(chicken)_Rev+Unrev51565sequences_Jan2024	45	cytoplasm,intermediate filament,intercalated disc,Z disc,sarcolemma,type III intermediate filament,dense body	intermediate filament polymerization,intermediate filament organization	structural molecule activity,protein binding	-1.0614	1.0597	2.1211	0.141165	0.00110035	0.0536267	0.141126	0.00920721	0.0763459	17.25	17.14	17.06	16.98	17.27	18.85	19.23	18.53	18.46	20.34	17.86	18.28	18.39	18.37	18.04	18.27	18.32	6022730	155786	143983	137056	129083	157559	471573	613938	379489	359587	1.32266e+06	237228	319334	344022	337680
Q9DEA6	Q9DEA6_CHICK	E-Tmod	Tropomodulin (Fragment)	Uniprot_Gallus-gallus(chicken)_Rev+Unrev51565sequences_Jan2024	26				1.0178	-0.5087	-1.5266	0.000562854	0.00891582	0.000103705	0.00668162	0.0263804	0.0031376	19.02	18.73	18.71	19.2	19.13	17.21	17.28	17	17.51	18.01	18.29	18.38	18.34	18.46	18.79	18.42	18.35	5955647	530981	434008	430193	602642	572915	151503	159046	131024	186799	263946	320801	341162	330887	361742
P08629	THIO_CHICK	TXN	Thioredoxin	Uniprot_Gallus-gallus(chicken)_Rev+Unrev51565sequences_Jan2024	10	extracellular region,nucleus,cytoplasm	transcription, DNA-templated,regulation of transcription, DNA-templated,glycerol ether metabolic process,response to radiation,regulation of protein import into nucleus, translocation,cellular response to oxidative stress,positive regulation of DNA binding,cell redox homeostasis,oxidation-reduction process,cellular oxidant detoxification	thioredoxin-disulfide reductase activity,protein disulfide oxidoreductase activity,oxidoreductase activity, acting on a sulfur group of donors, disulfide as acceptor,protein-disulfide reductase activity	0.6171	1.9173	1.3002	0.691754	0.417661	0.00297814	0.374024	0.278142	0.0151802	17.04	17.13	17.48	16.75	17.43	18.5	17.94	18.52	18.42	18.91	16.89	16.41	16.57	16.81	21.2	17.95	18.1	5950108	134959	143096	182794	110126	177149	371339	252152	376734	349934	492197	121455	86868.1	97225.2	114696
A0A8V0XPE2	A0A8V0XPE2_CHICK	AFP	Alpha fetoprotein	Uniprot_Gallus-gallus(chicken)_Rev+Unrev51565sequences_Jan2024	69				0.2959	2.9927	2.6968	0.835988	0.344466	0.0371121	0.421618	0.248341	0.060474	15.62	16	16.58	15.58	16.38	18.69	17.91	18.21	18.42	19.84	16.76	16.53	16.41	16.81	21.17	18.11	18.13	5947167	50252.2	65656.8	98167.8	49068.7	85106.7	422305	246234	302968	350445	935939	110933	94898.3	86995.8	114727
A0A8V1A6V5;A0A8V1A9E0;A0A8V1ACA0;A0A8V1AEB5;Q76MF7	A0A8V1A6V5_CHICK;A0A8V1A9E0_CHICK;A0A8V1ACA0_CHICK;A0A8V1AEB5_CHICK;Q76MF7_CHICK	NUCKS1;NUCKS1;NUCKS1;NUCKS1;JC7	Nuclear casein kinase and cyclin dependent kinase substrate 1;Nuclear casein kinase and cyclin dependent kinase substrate 1;Nuclear casein kinase and cyclin dependent kinase substrate 1;Nuclear casein kinase and cyclin dependent kinase substrate 1;JC7	Uniprot_Gallus-gallus(chicken)_Rev+Unrev51565sequences_Jan2024	14	;;;;	;;;;	;;;;	-0.3795	0.616	0.9956	0.635196	0.569055	0.0434889	0.355048	0.332196	0.0668365	17.53	17.79	18.55	17.27	17.7	18.48	18.86	18.34	18.54	19.57	17.66	17.31	16.82	17.25	20.13	18.28	18.28	5925561	188859	225971	382888	158308	212266	366385	475901	330877	380148	776104	206648	162900	116001	155828
A0A8V0YQZ5	A0A8V0YQZ5_CHICK	NUDT16L1	Nudix hydrolase 16 like 1	Uniprot_Gallus-gallus(chicken)_Rev+Unrev51565sequences_Jan2024	11				0.0395	0.1793	0.1398	0.910705	0.631344	0.241088	0.444458	0.353575	0.198525	18.2	18.49	18.49	18.24	18.1	18.5	18.6	18.57	18.39	18.16	18.65	18.8	18.74	18.91	15.5	18.36	18.19	5902666	300122	369417	368342	308628	281750	371289	397467	388604	343478	293107	410172	456955	438319	491768
A0A1D5NXB3	A0A1D5NXB3_CHICK	LOC100859276	RNA binding motif protein 4B	Uniprot_Gallus-gallus(chicken)_Rev+Unrev51565sequences_Jan2024	24			RNA binding,zinc ion binding	0.2513	0.235	-0.0163	0.339125	0.37485	0.922974	0.245982	0.2614	0.448262	18.43	18.15	17.9	18.61	18.51	18.32	18.38	18.15	18.04	18.66	18.5	18.79	18.89	18.8	17.52	18.26	18.3	5894063	352649	291583	244875	399887	372028	326710	340853	291807	269365	413579	369857	452871	487064	457432
A0A3S5ZPN3	A0A3S5ZPN3_CHICK	DDX5	Probable ATP-dependent RNA helicase DDX5	Uniprot_Gallus-gallus(chicken)_Rev+Unrev51565sequences_Jan2024	36				0.1911	0.3311	0.1401	0.638522	0.436199	0.399689	0.356117	0.285376	0.271192	18.22	18.17	18.29	18.48	18.01	18.5	18.6	18.47	18.44	17.76	18.87	18.91	18.85	18.87	14.52	18.41	18.35	5883220	305056	295548	319528	364895	263326	370032	396917	361921	355598	221735	477701	493587	473826	479132
A0A8V0XRE7	A0A8V0XRE7_CHICK	RPL24	Large ribosomal subunit protein eL24	Uniprot_Gallus-gallus(chicken)_Rev+Unrev51565sequences_Jan2024	18				-0.7344	-0.4476	0.2868	0.00785498	0.072304	0.0765379	0.0246188	0.0919714	0.0952078	18.56	18.42	18.01	18.53	18.56	18.7	18.48	18.55	18.75	19.04	17.68	17.89	17.91	17.55	18.62	18.29	18.36	5870830	386701	350165	264642	378478	385827	424710	366617	384093	440507	538211	210611	242404	246002	191883
A0A1D5PPP9;A0A8V0YZL9	A0A1D5PPP9_CHICK;A0A8V0YZL9_CHICK	PTMA	Uncharacterized protein;Prothymosin alpha	Uniprot_Gallus-gallus(chicken)_Rev+Unrev51565sequences_Jan2024	7	;	;	;	2.0575	4.1033	2.0458	0.464924	0.372985	0.0683757	0.295934	0.260604	0.0887782	15.09	15.66	16.37	14.66	15.32	17.12	16.96	16.78	17.33	18.73	16.25	15.12	14.88	15.72	21.89	18.03	18.12	5868680	34934.5	51890.5	84484.3	25874.2	41039.9	142847	127076	112780	164962	435940	77847.4	35585.8	30244.8	53791.8
A0A8V0XIC8	A0A8V0XIC8_CHICK	HNRNPD	Heteroous nuclear ribonucleoprotein D	Uniprot_Gallus-gallus(chicken)_Rev+Unrev51565sequences_Jan2024	17				1.3007	0.9802	-0.3206	0.0489874	0.0811997	0.000823782	0.0720492	0.0991061	0.00803458	18.12	17.99	18.17	18.14	17.99	17.78	17.94	17.69	17.72	17.67	18.85	18.71	18.61	18.7	19.95	18.25	18.1	5837161	285045	260311	295200	288397	260771	225539	251241	211220	216436	208400	471175	429488	401118	427072
A0A1D5PPF8	A0A1D5PPF8_CHICK	HSPA4	Heat shock 70 kDa protein 4	Uniprot_Gallus-gallus(chicken)_Rev+Unrev51565sequences_Jan2024	70			ATP binding	0.3055	0.4294	0.1239	0.58724	0.467516	0.350194	0.338461	0.296964	0.250782	18.12	18.22	18.26	18.04	18.38	18.54	18.04	18.35	18.54	18.11	18.18	18.04	18.1	18	19.82	18.17	18.2	5794106	284012	304973	314484	269333	340092	382002	268816	334772	380783	282173	296623	269186	280883	261917
F1NH21;Q5ZLF0	F1NH21_CHICK;F10A1_CHICK	ST13P5;ST13	Suppression of tumorigenicity 13 (colon carcinoma) (Hsp70 interacting protein) pseudo 5;Hsc70-interacting protein	Uniprot_Gallus-gallus(chicken)_Rev+Unrev51565sequences_Jan2024	17	cytosol;cytoplasm	;	protein dimerization activity;protein dimerization activity	0.6587	1.2288	0.57	0.46318	0.268726	0.0937557	0.295324	0.212884	0.10863	17.49	17.63	18.11	17.54	17.77	18.06	18.21	18.07	17.92	18.96	18.3	18.01	18.02	18.06	20.43	17.99	18.13	5782720	184377	203063	282070	191161	223571	272540	302578	275474	248678	510360	323459	263294	266626	273297
A0A1D5Q032	A0A1D5Q032_CHICK	CAP1	Adenylyl cyclase-associated protein	Uniprot_Gallus-gallus(chicken)_Rev+Unrev51565sequences_Jan2024	39		actin cytoskeleton organization	actin binding	0.3757	0.3861	0.0103	0.0284525	0.0223552	0.924662	0.0513106	0.0444343	0.448731	18.22	18.22	18.16	18.35	18.26	18.39	18.19	18.47	18.26	17.88	18.73	18.64	18.78	18.72	18.2	18.2	18.25	5751231	305326	304425	292676	334870	313340	344676	298839	364331	313035	240900	434550	407930	451136	432200
A0A8V0Y5F5;A0A8V0YE09	A0A8V0Y5F5_CHICK;A0A8V0YE09_CHICK	LDB3	LIM domain binding 3	Uniprot_Gallus-gallus(chicken)_Rev+Unrev51565sequences_Jan2024	49	;	;	;	-2.5218	-1.3626	1.1592	0.0111943	0.000149949	0.0402538	0.0297477	0.00368878	0.0636382	18.2	17.9	17.98	18.03	18.33	18.87	19.24	18.68	19.04	20.03	16.63	16.74	16.97	16.59	16.7	18.27	18.34	5723949	301270	244933	257780	267682	329393	479452	617224	421301	538996	1.072e+06	101724	109536	128634	98827.3
P79781	RS27A_CHICK	RPS27A	Ubiquitin-ribosomal protein eS31 fusion protein	Uniprot_Gallus-gallus(chicken)_Rev+Unrev51565sequences_Jan2024	10	nucleoplasm,cytosolic small ribosomal subunit,myelin sheath,cytoplasm,small ribosomal subunit,nucleus	DNA repair,translation,translesion synthesis,protein ubiquitination,modification-dependent protein catabolic process	structural constituent of ribosome,metal ion binding,RNA binding,protein tag,ubiquitin protein ligase binding,proteasome binding	0.7489	0.7356	-0.0133	0.477965	0.482893	0.933614	0.300532	0.302035	0.451423	18.31	18.17	17.78	18.01	18.13	17.78	18.08	17.96	17.96	18.49	17.7	17.73	17.9	17.77	20.44	18.18	18.18	5689773	324582	294742	224638	263748	286405	225576	276247	254914	255722	368857	213316	216923	244936	223402
A0A8V1A4K6	A0A8V1A4K6_CHICK	BTF3L4	Transcription factor BTF3	Uniprot_Gallus-gallus(chicken)_Rev+Unrev51565sequences_Jan2024	17				0.3262	0.6096	0.2834	0.666989	0.459047	0.369897	0.365589	0.293665	0.259372	17.78	17.97	18.26	18.11	18.18	17.83	18.42	18.14	17.94	19.08	18.09	17.83	17.86	17.79	20.1	18.01	17.99	5675505	225139	257342	314726	281959	297137	233020	350371	287947	250868	552822	279090	232402	237380	226387
A0A3Q2TV39	A0A3Q2TV39_CHICK	RPS27L	40S ribosomal protein S27	Uniprot_Gallus-gallus(chicken)_Rev+Unrev51565sequences_Jan2024	5				-1.3425	-0.7183	0.6242	0.000928315	0.00695015	0.0139231	0.00847058	0.0231783	0.0335925	18.48	18.07	18.02	18.32	18.51	18.76	18.82	18.58	19	19.32	17.46	17.93	17.92	17.55	16.7	18.31	18.14	5674903	365383	274406	264938	328041	374534	444223	463848	391660	522940	654679	180478	250482	247714	191802
A0A8V1A960	A0A8V1A960_CHICK	COPB2	Coatomer subunit beta'	Uniprot_Gallus-gallus(chicken)_Rev+Unrev51565sequences_Jan2024	56				0.8371	0.3909	-0.4462	7.21645e-05	0.00101322	0.00948438	0.00264767	0.00882199	0.0272198	18.33	18.39	18.33	18.34	18.34	18.1	17.92	18.01	17.98	17.38	18.69	18.8	18.87	18.68	18.64	18.12	18.21	5664512	330580	342933	329295	331800	332030	281216	248846	263772	258799	170665	423530	454890	478237	420314
P14315	CAPZB_CHICK	CAPZB	F-actin-capping protein subunit beta isoforms 1 and 2	Uniprot_Gallus-gallus(chicken)_Rev+Unrev51565sequences_Jan2024	19	cytosol,actin filament,F-actin capping protein complex,Z disc	cell morphogenesis,cytoskeleton organization,regulation of lamellipodium assembly,regulation of cell morphogenesis,actin cytoskeleton organization,barbed-end actin filament capping,negative regulation of filopodium assembly	actin filament binding	0.6497	0.1726	-0.4771	0.000156635	0.189791	0.0148708	0.00376092	0.171121	0.0349129	18.58	18.19	18.1	18.66	18.53	17.9	17.79	18.06	18.18	17.79	18.6	18.51	18.72	18.73	18.42	18.16	18.24	5624174	391313	299655	281914	413081	378808	245018	225990	273648	296035	227160	398025	372877	431481	434949
A0A8V1ANM3	A0A8V1ANM3_CHICK	TAX1BP3	Tax1-binding protein 3	Uniprot_Gallus-gallus(chicken)_Rev+Unrev51565sequences_Jan2024	5				-0.7541	0.376	1.1301	0.388716	0.751788	0.0399207	0.266686	0.394249	0.0633114	17.24	17.53	18.57	17.41	17.83	18.49	18.81	18.63	18.59	19.72	16.8	16.25	16.51	16.75	20.05	17.74	18.16	5624044	154656	188906	388336	173934	233807	369068	460534	406779	393936	864115	114460	77845.7	93261.9	110014
F1NAC8	F1NAC8_CHICK	SNRPA1	Small nuclear ribonucleoprotein A'	Uniprot_Gallus-gallus(chicken)_Rev+Unrev51565sequences_Jan2024	21	U2 snRNP,nuclear speck,U2-type catalytic step 2 spliceosome	mRNA splicing, via spliceosome,spermatogenesis	U2 snRNA binding	0.7809	0.4598	-0.3211	0.00870504	0.0458503	0.0388977	0.0260335	0.0690531	0.0622363	18.16	18.17	18.24	18.41	18.38	17.83	18.37	17.89	17.75	17.85	18.88	18.82	18.77	18.98	18.06	18.05	18.11	5593205	292684	294763	309678	349126	340279	232487	337697	243120	219780	236897	481174	462140	448111	516985
A0A8V1AE58;F1N8Z4	A0A8V1AE58_CHICK;F1N8Z4_CHICK	RUVBL1	RuvB-like helicase	Uniprot_Gallus-gallus(chicken)_Rev+Unrev51565sequences_Jan2024	29	;Swr1 complex,cytosol,intracellular ribonucleoprotein complex,Ino80 complex,NuA4 histone acetyltransferase complex,MLL1 complex,R2TP complex	;box C/D snoRNP assembly,DNA repair,DNA recombination,chromatin remodeling,transcription, DNA-templated,regulation of transcription from RNA polymerase II promoter,histone acetylation,DNA duplex unwinding,histone H4 acetylation,histone H2A acetylation,positive regulation of canonical Wnt signaling pathway,regulation of mitophagy,positive regulation of protein targeting to mitochondrion,positive r…	;TFIID-class transcription factor binding,transcription coactivator activity,ATP-dependent DNA helicase activity,ATP binding,TBP-class protein binding,ATP-dependent 5'-3' DNA helicase activity,ADP binding,cadherin binding,ATPase binding	-0.001	-0.054	-0.053	0.991728	0.590638	0.308143	0.468579	0.339563	0.232292	18.32	18.31	18.45	18.31	18.5	18.33	18.32	18.39	18.35	18.24	18.31	18.47	18.45	18.39	17.95	18.17	18.21	5590636	326736	324631	358227	325610	370025	330250	326615	342577	335153	309123	324573	362857	358097	343107
A0A8V0Y726	A0A8V0Y726_CHICK	TXNDC5	protein disulfide-isomerase	Uniprot_Gallus-gallus(chicken)_Rev+Unrev51565sequences_Jan2024	28				0.7736	1.2232	0.4496	0.232749	0.124258	0.0141444	0.19432	0.130216	0.0338399	17.81	17.56	17.69	17.59	17.83	18.11	18.35	18.27	17.73	18.21	18.47	18.25	18.42	18.53	20.04	18.18	18.14	5585921	230244	193622	210973	196720	232257	283562	333745	315638	217518	302305	362533	311227	350566	379021
A0A8V0ZH41	A0A8V0ZH41_CHICK	SYNPO2L	Synaptopodin 2 like	Uniprot_Gallus-gallus(chicken)_Rev+Unrev51565sequences_Jan2024	62				0.1107	0.1552	0.0444	0.842635	0.76423	0.873019	0.423667	0.398387	0.432891	18.37	18.14	18.2	18.36	18.3	17.9	18.5	17.82	17.98	19.03	17.77	18.02	17.85	17.89	19.61	18.15	18.15	5584796	338985	289630	301923	336928	323286	243826	370318	230726	258556	537100	223520	266449	236614	242567
A0A8V0XJC5;A0A8V0XPM5;A0A8V0XRT1;A0A8V0XRT7;A0A8V0XRU3	A0A8V0XJC5_CHICK;A0A8V0XPM5_CHICK;A0A8V0XRT1_CHICK;A0A8V0XRT7_CHICK;A0A8V0XRU3_CHICK	ARHGAP21	Rho GTPase activating protein 21	Uniprot_Gallus-gallus(chicken)_Rev+Unrev51565sequences_Jan2024	37	;;;;	;;;;	;;;;	0.0854	0.7312	0.6458	0.775507	0.0791555	0.015759	0.402277	0.0973924	0.0360951	17.93	17.66	17.58	18.02	17.95	18.27	18.56	18.07	18.51	18.88	18.27	18.4	18.3	18.23	19.32	18.21	18.17	5552146	249690	207145	195937	266656	253527	317017	386920	275424	374095	481792	317176	345364	323453	307377
A0A8V0Z8E7;A0A8V0Z8F1	A0A8V0Z8E7_CHICK;A0A8V0Z8F1_CHICK	SEPTIN7	Septin-7;Septin	Uniprot_Gallus-gallus(chicken)_Rev+Unrev51565sequences_Jan2024	26	;	;	;	0.5437	0.4632	-0.0806	0.0108643	0.0220789	0.314724	0.0292865	0.0440988	0.23515	18.17	18.25	18.16	18.16	18.16	18.15	18	18.22	18.24	17.86	18.74	18.64	18.78	18.82	18.15	18.19	18.18	5539969	294508	312194	293507	293588	293538	290536	262586	306227	309995	237224	438380	409838	449200	462854
R4GIQ2	R4GIQ2_CHICK	RPL21	60S ribosomal protein L21	Uniprot_Gallus-gallus(chicken)_Rev+Unrev51565sequences_Jan2024	14	cytosolic large ribosomal subunit	translation	structural constituent of ribosome	-0.7787	-0.3855	0.3931	0.0291383	0.0217863	0.142973	0.0521098	0.0437571	0.14231	18.48	18.15	18.01	18.42	18.29	18.53	18.47	18.38	18.51	19.27	17.64	17.91	18.26	17.83	17.75	18.33	18.19	5526241	364616	291347	264271	349595	320988	378845	363779	340709	372893	632896	204636	246408	313172	233280
A0A3Q2UAF8	A0A3Q2UAF8_CHICK	SYNCRIP	Synaptotagmin binding cytoplasmic RNA interacting protein	Uniprot_Gallus-gallus(chicken)_Rev+Unrev51565sequences_Jan2024	25				0.3591	0.2924	-0.0667	0.0830655	0.125131	0.496005	0.100472	0.130771	0.306573	18.19	18.18	18.24	18.38	18.25	18.35	18.29	18.23	18.16	17.82	18.72	18.64	18.59	18.73	17.87	18.07	18.14	5514665	298373	297748	309203	340933	310844	333708	320416	307751	292693	232132	430505	407151	395640	433821
F1NVB3	F1NVB3_CHICK	UNC45B	Protein unc-45 homolog B	Uniprot_Gallus-gallus(chicken)_Rev+Unrev51565sequences_Jan2024	70	cytosol,cytoplasm	chaperone-mediated protein folding,protein folding	Hsp90 protein binding	-0.9601	-1.1146	-0.1545	0.00731102	0.00343778	0.0594333	0.0236698	0.0163995	0.0813313	18.76	18.64	18.67	18.71	18.51	18.37	18.6	18.61	18.58	18.34	17.79	17.75	17.94	17.76	15.12	18.27	18.15	5494658	442979	407665	417990	428953	372995	339385	396843	399995	391690	332453	226032	220499	251970	222155
Q5ZJX9	Q5ZJX9_CHICK	RCJMB04_14i9	Proteasome subunit alpha type	Uniprot_Gallus-gallus(chicken)_Rev+Unrev51565sequences_Jan2024	14	nucleus,cytosol,proteasome core complex, alpha-subunit complex	proteasome-mediated ubiquitin-dependent protein catabolic process	threonine-type endopeptidase activity	0.93	0.8545	-0.0755	0.358809	0.384998	0.218633	0.254736	0.265283	0.187358	17.93	18.05	18.1	17.95	18.02	17.78	17.87	17.97	18.03	18.02	17.95	17.9	18.06	18.01	20.37	17.92	18.11	5494067	248915	272149	280760	253369	266181	224804	239801	257076	267412	264923	252685	243990	273850	264601
A0A8V0Z3Z0;A0A8V0Z3Z9	A0A8V0Z3Z0_CHICK;A0A8V0Z3Z9_CHICK	SCUBE2	Signal peptide, CUB domain and EGF like domain containing 2;Signal peptide, CUB domain and EGF like domain containing 2	Uniprot_Gallus-gallus(chicken)_Rev+Unrev51565sequences_Jan2024	2	;	;	;	0.5324	-0.1675	-0.6999	0.576467	0.836174	0.17538	0.334886	0.421688	0.162633	19.44	18.38	18.04	18.85	17.49	18.1	18.11	17.64	17.6	17.93	17.47	17.23	17.01	17.82	20.02	18.4	17.37	5472388	712226	341703	269942	470969	183468	281930	283553	204328	198901	249188	182061	153955	131926	230650
Q6J4Y8	Q6J4Y8_CHICK		FUS/TLS	Uniprot_Gallus-gallus(chicken)_Rev+Unrev51565sequences_Jan2024	12				0.4096	0.8317	0.4221	0.526561	0.281837	0.0648596	0.317546	0.219249	0.0860215	17.55	17.79	18.18	17.81	17.93	18.15	18.46	17.96	18.05	18.7	18.42	17.93	17.91	18	19.96	18	17.98	5445426	191593	227199	296708	230489	249851	290220	361396	255042	270498	425068	351297	248880	245848	262947
A0A1D5P9A5	A0A1D5P9A5_CHICK	CPSF6	Cleavage and polyadenylation specificity factor subunit 6	Uniprot_Gallus-gallus(chicken)_Rev+Unrev51565sequences_Jan2024	24				0.7125	0.4525	-0.2601	0.0635202	0.156941	0.0553323	0.0848938	0.151488	0.0778157	18.18	18.13	18.25	18.36	18.14	17.9	18.32	17.91	17.78	17.79	18.43	18.5	18.38	18.39	19.36	18.07	18.11	5433080	297129	286143	312673	337136	288802	244309	327489	246741	225010	227292	352004	371325	341726	344309
A0A175KE65;A0A1D5PN54	A0A175KE65_CHICK;A0A1D5PN54_CHICK	;ATP5F1AZ	ATP synthase subunit alpha	Uniprot_Gallus-gallus(chicken)_Rev+Unrev51565sequences_Jan2024	44	;proton-transporting ATP synthase complex, catalytic core F(1)	;ATP synthesis coupled proton transport,Requires Ontology	;ATP binding,proton-transporting ATP synthase activity, rotational mechanism	-1.0903	-0.0742	1.0162	0.111299	0.806473	0.125711	0.121496	0.412572	0.131189	18.51	17.3	17.52	18.16	17.59	18.51	18.62	18.56	18.16	19.93	17.17	18.12	18.09	17.96	17.51	18.1	18.13	5385536	372738	161004	188420	292812	197871	373192	404198	387337	292480	995802	147553	284434	279187	254125
A0A8V1AEP2	A0A8V1AEP2_CHICK		Myosin tail domain-containing protein	Uniprot_Gallus-gallus(chicken)_Rev+Unrev51565sequences_Jan2024	81				0.4736	-0.196	-0.6696	0.0686057	0.335743	0.00403741	0.089019	0.244611	0.0176807	18.7	18.41	18.2	18.81	18.53	17.71	18.15	17.69	17.76	18	18.31	18.56	18.55	18.55	17.54	18.21	18.17	5383559	424730	347481	300613	460425	379683	215054	291850	211461	221264	262995	323994	387459	385124	383402
A0A8V0YYH7	A0A8V0YYH7_CHICK	AKR1E2	Aldo-keto reductase family 1 member B1	Uniprot_Gallus-gallus(chicken)_Rev+Unrev51565sequences_Jan2024	26				0.5613	1.658	1.0968	0.705244	0.436893	0.00374848	0.37863	0.285544	0.0171511	16.83	17.34	17.79	16.39	17.43	18.38	17.69	18.24	18.64	18.54	17.18	16.23	16.32	16.63	20.95	17.79	17.99	5345943	116632	165777	226505	85999	177110	340187	211711	310304	408474	380469	148396	77063.5	81663.9	101418
A0A1D5PZS0	A0A1D5PZS0_CHICK	PRPF19	Pre-mRNA-processing factor 19	Uniprot_Gallus-gallus(chicken)_Rev+Unrev51565sequences_Jan2024	28				0.5141	0.1564	-0.3576	0.125063	0.544747	0.0139236	0.130717	0.323856	0.0335925	18.3	18.29	18.23	18.49	18.36	18.16	18.07	18.14	17.91	17.54	18.54	18.76	18.71	18.76	17.17	18	18.07	5332912	323331	319685	307899	368377	337439	292442	275405	288063	246565	190508	379869	445450	429028	444868
A0A1D5PJW4	A0A1D5PJW4_CHICK	PSMA7	Proteasome subunit alpha type	Uniprot_Gallus-gallus(chicken)_Rev+Unrev51565sequences_Jan2024	24	nucleus,cytoplasm,proteasome core complex, alpha-subunit complex	ubiquitin-dependent protein catabolic process	threonine-type endopeptidase activity	1.0197	0.9158	-0.1039	0.351693	0.384008	0.131619	0.251456	0.264949	0.135185	17.98	17.92	18.05	17.84	17.95	17.78	17.83	17.86	18.02	17.71	17.94	17.85	17.9	17.97	20.41	17.9	17.94	5321612	257864	248469	270774	234229	252675	225113	233535	237484	265179	214861	252030	236903	245306	255863
A0A8V0Z1H4	A0A8V0Z1H4_CHICK	EIF4G1	Eukaryotic translation initiation factor 4 gamma 1	Uniprot_Gallus-gallus(chicken)_Rev+Unrev51565sequences_Jan2024	79				-0.5028	-0.5931	-0.0903	0.00436963	0.000227101	0.384426	0.0183155	0.00443709	0.265125	18.42	18.58	18.34	18.58	18.39	18.48	18.32	18.48	18.51	18.03	17.94	17.94	17.94	17.99	17.48	18.18	18.22	5306916	350766	391776	331386	391578	342727	365603	326546	365922	373383	267078	251705	251162	252091	260806
F1NIM4;Q5ZJT4	F1NIM4_CHICK;Q5ZJT4_CHICK	FKBP4;RCJMB04_15n8	peptidylprolyl isomerase	Uniprot_Gallus-gallus(chicken)_Rev+Unrev51565sequences_Jan2024	39	cell,nucleoplasm,cytoplasm,cytosol;	protein peptidyl-prolyl isomerization,steroid hormone receptor complex assembly,androgen receptor signaling pathway,prostate gland development,protein complex localization,male sex differentiation,chaperone-mediated protein folding;	peptidyl-prolyl cis-trans isomerase activity,ATP binding,GTP binding,FK506 binding,heat shock protein binding,glucocorticoid receptor binding,phosphoprotein binding;	0.0702	0.519	0.4488	0.916354	0.512248	0.030451	0.446092	0.312415	0.0536275	17.74	17.96	18.08	17.67	18.13	18.72	18.06	18.36	18.51	18.13	17.87	17.54	17.64	17.59	19.87	18	18.07	5272608	219491	254343	277524	208347	287210	430748	274174	336681	372565	287731	239064	189957	204435	197722
A0A8V0YNG3	A0A8V0YNG3_CHICK	G3BP1	G3BP stress granule assembly factor 1	Uniprot_Gallus-gallus(chicken)_Rev+Unrev51565sequences_Jan2024	30				0.1162	0.0047	-0.1115	0.309413	0.955231	0.188092	0.232866	0.457946	0.170199	18.31	18.26	18.3	18.24	18.31	18.27	18.38	18.13	18.08	17.97	18.21	18.3	18.18	18.17	18.56	18.09	18.12	5242800	325691	314773	323618	308893	324556	315365	342068	287092	276909	257288	302498	323176	296541	293943
A0A8V0ZY56	A0A8V0ZY56_CHICK	CSDE1	Cold shock domain containing E1	Uniprot_Gallus-gallus(chicken)_Rev+Unrev51565sequences_Jan2024	57				-0.0879	-0.1444	-0.0566	0.654965	0.445757	0.469653	0.361769	0.288728	0.297673	18.34	18.3	18.26	18.41	18.23	18.37	18.33	18.28	18.28	17.97	18.3	18.35	18.36	18.32	17.19	18.15	18.11	5230701	331892	322972	312835	348937	308130	339497	329447	319003	317474	256843	323321	335148	335326	326720
D2Z1L9	D2Z1L9_CHICK	LASP1	LIM and SH3 domain protein 1	Uniprot_Gallus-gallus(chicken)_Rev+Unrev51565sequences_Jan2024	21				0.3993	0.9965	0.5971	0.711149	0.449791	0.142248	0.380619	0.290235	0.141846	17.68	17.56	17.75	17.49	17.79	18	18.13	17.86	17.85	19.05	17.47	17.33	17.07	17.49	20.41	18.14	18.08	5228900	210327	192675	221138	184181	226287	261285	287454	237235	236596	542499	181518	164676	137952	183750
A0A1L1RWX8	A0A1L1RWX8_CHICK	VPS35	Vacuolar protein sorting-associated protein 35	Uniprot_Gallus-gallus(chicken)_Rev+Unrev51565sequences_Jan2024	44				-0.0779	-0.3559	-0.278	0.811364	0.25662	0.0487309	0.414052	0.206764	0.0718022	18.26	18.61	18.56	18.29	18.48	18.36	18.14	18.19	18.33	17.75	18.42	18.31	18.34	18.38	15.54	18.11	18.12	5224607	314112	400129	385591	321162	365275	335945	288062	298542	330044	220633	350673	324493	332620	340248
Q9DDU8	Q9DDU8_CHICK		Transformer-2 beta	Uniprot_Gallus-gallus(chicken)_Rev+Unrev51565sequences_Jan2024	20	nuclear inner membrane,nucleoplasm,spliceosomal complex	regulation of alternative mRNA splicing, via spliceosome,mRNA splicing, via spliceosome,cerebral cortex regionalization,negative regulation of mRNA splicing, via spliceosome,positive regulation of mRNA splicing, via spliceosome,protein oligomerization,cellular response to glucose stimulus,embryonic brain development	mRNA binding,protein domain specific binding,pre-mRNA binding,identical protein binding,poly-purine tract binding	0.8562	0.3583	-0.4979	0.00130477	0.0109096	0.0343361	0.0100256	0.0293266	0.0577348	18.52	18.02	18.1	18.42	18.17	17.52	18.06	17.58	17.2	18.21	18.64	18.62	18.44	18.77	18.6	18.11	17.94	5222346	376505	266142	280664	350377	294225	188565	272828	195330	150775	302774	408363	401718	354571	447943
Q90WF1	Q90WF1_CHICK		Filamin	Uniprot_Gallus-gallus(chicken)_Rev+Unrev51565sequences_Jan2024	147				2.0831	1.8774	-0.2057	2.06198e-05	6.4771e-06	0.065478	0.00151978	0.000957338	0.0864918	17.43	17.29	17.23	17.24	17.62	17.19	17	17.25	17.15	17.22	19.16	19.15	19.17	19.32	19.41	17.94	17.97	5199471	176338	160753	153964	154377	201209	149785	131333	155513	145261	152255	586658	583529	588187	655840
Q5ZME8	SMU1_CHICK	SMU1	WD40 repeat-containing protein SMU1	Uniprot_Gallus-gallus(chicken)_Rev+Unrev51565sequences_Jan2024	24	spliceosomal complex,cytoplasm,nuclear speck,precatalytic spliceosome,nucleus	regulation of alternative mRNA splicing, via spliceosome,mRNA processing,RNA splicing		0.7411	0.3202	-0.4209	0.0913965	0.337189	0.0200061	0.106726	0.245208	0.0416763	18.17	18.17	18.19	18.41	18.24	17.98	18.09	17.88	17.79	17.19	18.71	18.92	18.79	18.75	16.73	18.02	18.04	5161134	295270	294776	298368	347297	308650	258032	278595	240580	226874	149491	429779	495416	454231	439920
A0A3Q2UI67	A0A3Q2UI67_CHICK	PPP1R12B	Protein phosphatase 1 regulatory subunit	Uniprot_Gallus-gallus(chicken)_Rev+Unrev51565sequences_Jan2024	65				-0.0193	-0.4187	-0.3995	0.97182	0.394434	0.00544568	0.462823	0.269053	0.0204573	18.55	18.44	18.53	18.54	18.39	17.96	18.29	17.87	17.94	18.31	17.47	17.52	17.43	17.35	19.34	18.06	18.05	5158649	383577	354515	378337	381190	342752	255779	321583	239970	252206	325689	181253	188119	177187	166720
A0A8V0ZRL1;Q5ZJ02	A0A8V0ZRL1_CHICK;ZN326_CHICK	ZNF326	DBIRD complex subunit ZNF326	Uniprot_Gallus-gallus(chicken)_Rev+Unrev51565sequences_Jan2024	24	;nucleoplasm,nuclear matrix,DBIRD complex,spliceosomal complex	;mRNA processing,RNA splicing,regulation of DNA-templated transcription, elongation,regulation of RNA splicing	;RNA polymerase II core binding,DNA binding,metal ion binding	0.6304	0.1474	-0.483	0.148081	0.65579	0.00535262	0.145779	0.362115	0.0203026	18.48	18.16	18.07	18.47	18.27	17.85	18.06	17.62	17.54	17.95	18.61	18.83	18.7	18.66	16.27	18.23	18.12	5146311	366844	291977	275747	362977	315201	235680	273149	201680	190829	252537	399853	467055	426316	413956
Q9DEA3	PCNA_CHICK	PCNA	Proliferating cell nuclear antigen	Uniprot_Gallus-gallus(chicken)_Rev+Unrev51565sequences_Jan2024	20	nucleus,nucleoplasm,centrosome,nuclear body,nuclear replication fork,PCNA complex,PCNA-p21 complex	leading strand elongation,DNA repair,mismatch repair,translesion synthesis,epithelial cell differentiation,positive regulation of deoxyribonuclease activity,cellular response to UV,positive regulation of DNA repair,positive regulation of DNA replication	purine-specific mismatch base pair DNA N-glycosylase activity,chromatin binding,damaged DNA binding,enzyme binding,DNA polymerase processivity factor activity,receptor tyrosine kinase binding,dinucleotide insertion or deletion binding,MutLalpha complex binding,histone acetyltransferase binding,identical protein binding,DNA polymerase binding	0.2538	0.9851	0.7313	0.780446	0.411013	0.0015746	0.403913	0.27549	0.0110651	17.45	17.79	17.79	17.34	17.52	18.36	18.08	18.28	18.62	18.21	17.76	17.17	17.37	17.48	20.23	18.18	18.03	5144347	179570	227209	226083	166460	187510	336740	276534	318283	404052	302666	222076	147838	169197	182588
A0A8V0ZPK8	A0A8V0ZPK8_CHICK	CIAPIN1	Anamorsin	Uniprot_Gallus-gallus(chicken)_Rev+Unrev51565sequences_Jan2024	20				-0.7198	0.6829	1.4027	0.217014	0.429445	0.00297275	0.18648	0.28266	0.0151787	17.18	17.5	17.71	17.03	17.46	18.65	18.49	18.67	18.76	19.29	17.64	17.05	17.15	17.2	19.51	18.08	18.09	5084727	148358	184832	215010	133965	180604	411759	367142	415911	443438	642944	204622	136024	145182	150804
Q09121	IF5A1_CHICK	EIF5A1	Eukaryotic translation initiation factor 5A-1	Uniprot_Gallus-gallus(chicken)_Rev+Unrev51565sequences_Jan2024	18	nuclear pore,endoplasmic reticulum membrane	translational frameshifting,protein transport,positive regulation of translational elongation,positive regulation of translational termination,mRNA transport	translation elongation factor activity,ribosome binding	0.1939	1.1485	0.9546	0.866117	0.475059	0.00391146	0.431027	0.29953	0.0174689	17.13	17.54	17.93	17.06	17.44	18.29	18.22	18.3	18.25	18.87	17.1	16.63	16.82	16.95	20.52	17.67	17.85	5070610	143185	190598	249162	136896	177724	319845	305477	323388	310818	479998	140582	101353	115358	126980
A0A8V0YNP9	A0A8V0YNP9_CHICK	RAD23B	UV excision repair protein RAD23	Uniprot_Gallus-gallus(chicken)_Rev+Unrev51565sequences_Jan2024	17				0.172	0.8047	0.6326	0.816997	0.394641	0.0338571	0.415844	0.269134	0.0573088	17.43	17.6	18.17	17.35	17.76	18.32	18.12	18.06	18.12	18.85	17.99	17.53	17.48	17.53	19.97	17.91	18	5065429	176845	199049	294750	167317	222578	327603	285038	273924	283986	473694	260523	189295	183437	189627
A0A1D5PMU2;A0A8V0ZR27	A0A1D5PMU2_CHICK;A0A8V0ZR27_CHICK	PAFAH1B2	1-alkyl-2-acetylglycerophosphocholine esterase	Uniprot_Gallus-gallus(chicken)_Rev+Unrev51565sequences_Jan2024	12	;	;	;	0.8665	1.4854	0.6189	0.5265	0.379309	0.0140408	0.317541	0.263156	0.0337473	17.13	17.5	17.76	16.97	17.51	17.74	17.67	18.02	18.29	18.27	17.59	17.03	17.29	17.51	20.73	17.49	17.84	5037483	142994	185358	222145	128361	186573	218286	208705	265987	319970	316059	197003	133609	160440	187196
A0A8V0YL16;A0A8V0YSM8;F1P0Q8	A0A8V0YL16_CHICK;A0A8V0YSM8_CHICK;F1P0Q8_CHICK	DKC1	Dyskerin pseudouridine synthase 1	Uniprot_Gallus-gallus(chicken)_Rev+Unrev51565sequences_Jan2024	37	;;fibrillar center,Cajal body,box H/ACA snoRNP complex,box H/ACA telomerase RNP complex	;;telomere maintenance via telomerase,rRNA pseudouridine synthesis,positive regulation of telomere maintenance via telomerase,box H/ACA snoRNA metabolic process,positive regulation of telomerase activity,telomerase RNA stabilization,positive regulation of establishment of protein localization to telomere,positive regulation of telomerase RNA localization to Cajal body	;;telomerase activity,pseudouridine synthase activity,box H/ACA snoRNA binding,telomerase RNA binding	0.6749	0.255	-0.4199	0.0255884	0.227595	0.0135479	0.0482243	0.191802	0.0330711	18.37	18.11	18.16	18.27	18.19	17.96	18	17.89	17.8	17.22	18.62	18.69	18.54	18.66	17.63	18.04	18.06	5033161	339053	282140	291904	315898	298179	254575	262891	242768	228869	152395	403109	421860	381672	413290
A0A8V0Y9B2	A0A8V0Y9B2_CHICK	LDB3	LIM domain binding 3	Uniprot_Gallus-gallus(chicken)_Rev+Unrev51565sequences_Jan2024	11				-2.084	-0.7902	1.2938	0.0255052	0.0605663	0.0593718	0.0481328	0.0821737	0.081284	17.89	17.61	17.89	17.61	17.75	18.57	18.99	18.44	18.7	19.96	16.42	16.46	16.68	16.36	18.06	18.06	18.13	5018398	242177	200421	243032	199441	221164	388689	519353	355717	425592	1.02293e+06	87802.4	90104.8	105075	84051.1
A0A8V0YLX9	A0A8V0YLX9_CHICK	CKB	creatine kinase	Uniprot_Gallus-gallus(chicken)_Rev+Unrev51565sequences_Jan2024	2				0.0422	1.788	1.7459	0.971217	0.394495	0.00205798	0.462667	0.269075	0.0127509	16.42	17.08	17.17	16.38	16.86	18.53	17.91	18.49	18.78	18.92	16.94	16.38	16.43	16.72	20.6	17.92	17.91	5009829	87571.5	138697	147950	85291.9	118761	378929	245917	368726	449031	496878	125672	85528.6	88460.7	108093
A0A8V0Z9Y8;A0A8V0ZFX8;Q5ZMP6	A0A8V0Z9Y8_CHICK;A0A8V0ZFX8_CHICK;AP2M1_CHICK	AP2M1	AP-2 complex subunit mu	Uniprot_Gallus-gallus(chicken)_Rev+Unrev51565sequences_Jan2024	27	;;plasma membrane,clathrin-coated pit,clathrin adaptor complex	;;intracellular protein transport,endocytosis	;;lipid binding	0.4865	-0.0471	-0.5335	0.193994	0.863681	0.00402682	0.173586	0.430111	0.0176627	18.29	18.35	18.34	18.42	18.38	17.97	17.95	17.97	17.83	17.28	18.51	18.59	18.61	18.48	16.48	18.06	18	4995528	321339	333676	332666	349854	340556	257331	252430	257338	232669	159566	373464	395686	399107	364530
Q5ZL33	STRAP_CHICK	STRAP	Serine-threonine kinase receptor-associated protein	Uniprot_Gallus-gallus(chicken)_Rev+Unrev51565sequences_Jan2024	24	nucleus,cytosol,SMN complex,SMN-Sm protein complex	negative regulation of transcription from RNA polymerase II promoter,spliceosomal snRNP assembly,negative regulation of transforming growth factor beta receptor signaling pathway	receptor binding	0.3894	0.4356	0.0462	0.456942	0.414405	0.530954	0.292859	0.276823	0.319022	17.96	18.07	17.95	18.03	18	18.11	18.18	18.07	18.09	17.78	18.03	17.89	17.93	17.96	19.54	18.01	18.04	4984036	255617	274946	254083	268107	261944	282161	296168	274252	279550	225390	268153	242373	249583	255394
A0A8V0XM98	A0A8V0XM98_CHICK	LRBA	LPS responsive beige-like anchor protein	Uniprot_Gallus-gallus(chicken)_Rev+Unrev51565sequences_Jan2024	48				-0.1451	-0.4455	-0.3004	0.613081	0.116436	0.0270333	0.347369	0.124997	0.0498736	18.29	18.51	18.36	18.38	18.44	18.28	18.04	18.14	18.28	17.68	18.18	18.25	18.2	18.14	16.11	18.17	18.12	4981218	320476	374501	337399	341615	354571	317483	269518	289199	317461	209934	296566	312746	301486	287865
Q5ZLC7	MARE1_CHICK	MAPRE1	Microtubule-associated protein RP/EB family member 1	Uniprot_Gallus-gallus(chicken)_Rev+Unrev51565sequences_Jan2024	22	Golgi apparatus,centrosome,microtubule,cytoplasmic microtubule,cortical microtubule cytoskeleton,cell projection membrane,microtubule plus-end,spindle	cell cycle,negative regulation of microtubule polymerization,positive regulation of microtubule polymerization,protein localization to microtubule,cell division,positive regulation of microtubule plus-end binding	protein kinase binding,identical protein binding,cadherin binding,microtubule plus-end binding	-0.6004	-0.3052	0.2952	0.0480329	0.296672	0.0295726	0.0712101	0.22638	0.0526372	17.92	18.25	18.43	17.89	18.15	18.38	18.45	18.34	18.46	18.56	17.79	17.36	17.43	17.59	18.62	18.12	18.13	4973177	248568	312744	354169	243429	290816	341890	358176	331004	360753	387041	226818	168540	176395	197675
A0A3Q2U1A5;A0A8V1A0C3	A0A3Q2U1A5_CHICK;A0A8V1A0C3_CHICK	CTNND1	Catenin delta 1	Uniprot_Gallus-gallus(chicken)_Rev+Unrev51565sequences_Jan2024	57	;	;	;	-0.1428	-0.246	-0.1032	0.624572	0.404981	0.276465	0.351306	0.27323	0.216749	18.36	18.23	18.07	18.49	18.2	18.27	18.26	18.18	18.03	18.12	18.18	18.43	18.32	18.2	15.95	18.15	18.05	4968961	336114	307670	275892	369282	300180	315021	314634	297177	267872	284725	297689	352178	326592	300274
P38024;R9PXP8	PUR6_CHICK;R9PXP8_CHICK	AIRC;PAICS	Multifunctional protein ADE2;PurE domain-containing protein	Uniprot_Gallus-gallus(chicken)_Rev+Unrev51565sequences_Jan2024	31	cytosol;cytosol	'de novo' IMP biosynthetic process;	phosphoribosylaminoimidazole carboxylase activity,phosphoribosylaminoimidazolesuccinocarboxamide synthase activity,ATP binding;	-0.2325	-0.0847	0.1478	0.174747	0.200449	0.340858	0.162315	0.17732	0.246742	18.17	18.25	18.05	18.11	18.15	18.44	18.07	18.39	18.6	17.87	17.99	18.21	18.06	17.92	18.12	18	18.02	4964530	295422	312356	271926	283025	290989	355483	274920	342407	398370	239389	259770	303876	273121	248754
A0A8V0YV89;P09207	A0A8V0YV89_CHICK;TBB6_CHICK	TUBB1;	Tubulin beta chain;Tubulin beta-6 chain	Uniprot_Gallus-gallus(chicken)_Rev+Unrev51565sequences_Jan2024	7	;cytoplasm,microtubule	;spindle assembly,microtubule-based process,microtubule cytoskeleton organization,mitotic cell cycle	;GTPase activity,structural constituent of cytoskeleton,GTP binding	-2.6326	-1.1334	1.4992	4.8918e-06	0.0228216	2.83461e-05	0.000815111	0.0450256	0.00176702	17.54	17.63	17.11	17.5	18.16	19.18	18.82	19.09	19.16	19.35	15.91	16.59	16.9	17.45	9.11	18.14	18.3	4951976	190007	203189	141078	185256	293820	592023	463841	556560	585977	666126	61640.6	98337.7	122428	178956
Q5ZL72	CH60_CHICK	HSPD1	60 kDa heat shock protein, mitochondrial	Uniprot_Gallus-gallus(chicken)_Rev+Unrev51565sequences_Jan2024	48	cytoplasm,mitochondrion,mitochondrial inner membrane,mitochondrial matrix,early endosome,cytosol,plasma membrane,clathrin-coated pit,cell surface,cyclin-dependent protein kinase activating kinase holoenzyme complex,coated vesicle,secretory granule,neuronal cell body,myelin sheath,lipopolysaccharide receptor complex,extracellular exosome	regulation of cytokine production,B cell cytokine production,MyD88-dependent toll-like receptor signaling pathway,positive regulation of T cell mediated immune response to tumor cell,'de novo' protein folding,activation of cysteine-type endopeptidase activity involved in apoptotic process,response to unfolded protein,apoptotic mitochondrial changes,response to cold,positive regulation of interfer…	lipopolysaccharide binding,p53 binding,double-stranded RNA binding,protein binding,ATP binding,high-density lipoprotein particle binding,hydrolase activity,ubiquitin protein ligase binding,apolipoprotein A-I binding,protein binding involved in protein folding,unfolded protein binding,chaperone binding	-0.9432	-0.6044	0.3388	0.0543145	0.0767858	0.336121	0.0769908	0.0954371	0.244807	18.65	17.9	18.08	18.38	17.75	18.23	18.34	19.27	17.86	18.56	17.31	18.16	17.99	17.46	16.43	18.13	18.09	4941173	412384	245208	276457	342259	221171	307515	332048	630917	237532	385920	161968	293903	260390	180474
A0A8V0ZPI2;Q8UWA0	A0A8V0ZPI2_CHICK;Q8UWA0_CHICK	MYH7B;SSMHC	Myosin, heavy chain 7B, cardiac muscle, beta;Myosin heavy chain	Uniprot_Gallus-gallus(chicken)_Rev+Unrev51565sequences_Jan2024	64	;	;	;	1.3494	-0.6409	-1.9903	0.00747995	0.248921	0.04528	0.0239431	0.202799	0.0684801	19.02	17.88	16.98	19.55	19.3	16.74	16.51	16.66	17.12	17.03	17.42	18.55	18.37	18.37	17.91	17.97	18.04	4907163	530592	240975	129693	769450	643840	109424	93638.4	103811	141971	133683	174823	384089	339417	339193
A0A8V1AF05	A0A8V1AF05_CHICK	PSMD4	26S proteasome non-ATPase regulatory subunit 4	Uniprot_Gallus-gallus(chicken)_Rev+Unrev51565sequences_Jan2024	12				0.1748	0.0976	-0.0771	0.320068	0.543465	0.269029	0.237556	0.323435	0.213021	18.1	18.11	18.23	18.09	18.2	17.97	18.07	18.01	18	18.27	18.07	18.08	18.08	18.16	18.72	18	18.02	4905333	280216	282190	307976	278341	301762	256275	275533	263844	262725	316582	274466	277084	277496	292381
A0A8V0YEN4;A0A8V0YL25	A0A8V0YEN4_CHICK;A0A8V0YL25_CHICK	PRDX6	Peroxiredoxin-6	Uniprot_Gallus-gallus(chicken)_Rev+Unrev51565sequences_Jan2024	23	;	;	;	-0.6685	0.3542	1.0228	0.333779	0.694207	0.0240772	0.243692	0.374777	0.0464442	17.33	17.7	18.25	16.92	17.65	18.44	18.05	18.5	18.72	19.29	17.4	16.67	16.84	16.92	19.58	17.97	17.94	4900173	164839	212536	312444	123735	205538	354413	270914	371704	432479	641089	172510	104494	117284	124041
A0A3Q2TSP8;A0A8V0Z1C2	A0A3Q2TSP8_CHICK;A0A8V0Z1C2_CHICK	EPRS	Glutamyl-prolyl-tRNA synthetase	Uniprot_Gallus-gallus(chicken)_Rev+Unrev51565sequences_Jan2024	98	;	;	;	0.2893	-0.0921	-0.3814	0.128352	0.532817	0.0135919	0.133	0.319652	0.0331435	18.41	18.34	18.01	18.3	18.38	18.09	17.74	18.08	18.03	17.53	18.2	18.34	18.34	18.39	17.62	18.04	17.98	4877686	348879	331103	264579	322368	340468	279622	218244	277810	268519	189824	300425	331203	332517	343111
F1NC26	F1NC26_CHICK	HSPA4L	Heat shock protein family A (Hsp70) member 4 like	Uniprot_Gallus-gallus(chicken)_Rev+Unrev51565sequences_Jan2024	62	cytosol,cytoplasm,nucleus	cellular response to heat,cellular response to unfolded protein,chaperone mediated protein folding requiring cofactor,protein refolding,response to unfolded protein	ATP binding,protein binding involved in protein folding,heat shock protein binding,unfolded protein binding,ATPase activity, coupled,misfolded protein binding,ATPase activity	-0.1209	0.1504	0.2712	0.608964	0.534885	0.0591482	0.345887	0.320434	0.0810764	17.92	18.05	17.97	17.93	18.11	18.49	18.17	18.26	18.43	17.93	18	17.87	17.92	17.91	18.81	18.03	18	4875935	248572	271439	257431	249840	283196	367096	295296	314555	354220	250376	262086	239994	248156	245473
Q02960	MIF_CHICK	MIF	Macrophage migration inhibitory factor	Uniprot_Gallus-gallus(chicken)_Rev+Unrev51565sequences_Jan2024	6	extracellular space,cytoplasm	inflammatory response,regulation of receptor activity,innate immune response	dopachrome isomerase activity,cytokine activity,MHC class II protein binding,phenylpyruvate tautomerase activity	1.0769	2.1262	1.0493	0.556575	0.400514	0.00276632	0.327915	0.271435	0.0146454	16.71	16.86	17.31	16.52	16.9	17.88	17.5	17.94	17.89	18.34	16.69	16.59	16.25	16.57	21.11	17.41	17.64	4871680	107434	118607	162038	94157	122181	241507	184726	251547	242327	330715	105619	98910.4	78112.3	97129.7
A0A8V0ZLM5	A0A8V0ZLM5_CHICK	VPS26A	VPS26, retromer complex component A	Uniprot_Gallus-gallus(chicken)_Rev+Unrev51565sequences_Jan2024	14				0.6493	0.2617	-0.3877	0.311357	0.623395	0.0113995	0.233598	0.350962	0.0300428	18.1	18.23	18.3	18.01	18.2	18.03	17.58	17.84	17.95	17.43	17.93	17.82	18.01	17.81	19.6	17.96	17.84	4861331	281366	306738	321849	263475	301704	268084	195857	234291	252491	176800	250048	230703	264039	230259
A0A8V1AC80;Q5ZHW6	A0A8V1AC80_CHICK;Q5ZHW6_CHICK	SGTA;RCJMB04_32j5	Small glutamine rich tetratricopeptide repeat containing alpha;SGTA homodimerisation domain-containing protein	Uniprot_Gallus-gallus(chicken)_Rev+Unrev51565sequences_Jan2024	18	;	;	;	1.1304	1.478	0.3476	0.440847	0.369639	0.141132	0.286936	0.259321	0.141106	17.04	17.43	17.71	17.23	17.53	17.5	17.6	17.59	17.65	18.28	17.68	17.23	17.41	17.38	20.71	17.76	17.88	4857979	134394	177160	214934	153351	189171	185612	198561	197891	205496	318173	209995	153790	174687	170190
A0A8V1A3S0;A0A8V1AE27;A0A8V1AG33	A0A8V1A3S0_CHICK;A0A8V1AE27_CHICK;A0A8V1AG33_CHICK	HDGF	Heparin binding growth factor	Uniprot_Gallus-gallus(chicken)_Rev+Unrev51565sequences_Jan2024	27	;;	;;	;;	0.7219	1.9786	1.2567	0.65744	0.413865	0.0214414	0.362568	0.276627	0.0432991	16.66	16.89	17.32	16.45	16.86	17.78	17.84	17.83	18	18.84	16.74	15.99	16.07	16.58	20.94	17.86	17.91	4856984	103306	121461	163156	89595.8	119178	225188	234836	233512	262171	470100	109349	65099.2	68724.8	97700.6
F1NPU8	F1NPU8_CHICK	HMGB2	High mobility group protein B2	Uniprot_Gallus-gallus(chicken)_Rev+Unrev51565sequences_Jan2024	24	nuclear chromatin,condensed chromosome,extracellular space,nucleus,nucleolus,cytoplasm,macromolecular complex,perinuclear region of cytoplasm	positive regulation of endothelial cell proliferation,inflammatory response to antigenic stimulus,spermatid nucleus differentiation,male gonad development,positive regulation of gene expression,negative regulation of gene expression,positive regulation of nuclease activity,DNA geometric change,response to lipopolysaccharide,positive regulation of interferon-beta production,response to drug,positi…	four-way junction DNA binding,enhancer sequence-specific DNA binding,damaged DNA binding,transcription factor activity, sequence-specific DNA binding,transcription factor binding,drug binding,DNA binding, bending,protein domain specific binding,chemoattractant activity,RAGE receptor binding	0.6068	1.5338	0.927	0.673312	0.433613	0.0210828	0.367713	0.284314	0.0428646	17.18	17.25	17.63	16.84	16.97	17.85	17.93	17.86	18.03	18.74	17.03	16.51	16.43	16.83	20.74	17.92	17.89	4852796	148286	155352	203018	117298	128534	236849	249846	237907	266934	439202	134134	93409.4	88258.3	116178
P13647	SWISS-PROT:P13647		Tax_Id=9606 Gene_Symbol=KRT5 Keratin, type II cytoskeletal 5	contaminants_mq1,6_headersForSpectronaut	35				1.6901	1.3666	-0.3235	0.0470834	0.06618	0.298927	0.0702008	0.0869668	0.227542	17.99	16.62	17.59	17.76	17.64	17.87	16.67	16.84	17.24	17.39	18.22	18.5	18.2	19.86	19.22	18.1	17.92	4841289	259819	100723	197967	222599	204116	239793	104055	117514	154304	171655	305084	370109	301172	953006
A0A1D5PC74	A0A1D5PC74_CHICK	BCLAF1	BCL2 associated transcription factor 1	Uniprot_Gallus-gallus(chicken)_Rev+Unrev51565sequences_Jan2024	43				1.5275	0.8744	-0.6531	0.00445234	0.0197739	0.00520906	0.0185158	0.0413889	0.0199981	18.03	17.8	17.76	18.15	17.87	17.17	17.8	17.19	16.8	17.23	18.56	18.74	18.52	18.64	19.38	17.95	17.92	4831514	267928	227777	221393	291625	239236	147543	228429	149850	114369	153423	385246	438428	376130	407270
A0A8V0Z3K2	A0A8V0Z3K2_CHICK	PSMC1	Proteasome 26S subunit, ATPase 1	Uniprot_Gallus-gallus(chicken)_Rev+Unrev51565sequences_Jan2024	38				-0.1485	-0.4253	-0.2769	0.434468	0.0390354	0.0145164	0.284719	0.0624051	0.034424	18.34	18.44	18.31	18.34	18.33	18.13	18.03	18.15	18.25	17.77	18.03	18.12	18.13	18.05	17.05	18.02	18	4830220	331319	355578	325834	332454	328811	286373	267708	291447	312645	223526	266889	284857	286741	272137
A0A8V0ZQN3	A0A8V0ZQN3_CHICK	PPP1CA	Serine/threonine-protein phosphatase	Uniprot_Gallus-gallus(chicken)_Rev+Unrev51565sequences_Jan2024	6				0.376	0.4405	0.0645	0.333341	0.273598	0.403625	0.24354	0.215394	0.272701	17.88	17.97	17.91	18.04	17.95	17.97	18.23	17.98	18.03	17.85	18.05	18.08	18.06	18.04	19.26	18.05	17.84	4816895	241119	256525	246360	270053	252718	256168	307295	258529	267172	235549	271443	276679	272603	269470
Q90684	Q90684_CHICK		Nebulette (Fragment)	Uniprot_Gallus-gallus(chicken)_Rev+Unrev51565sequences_Jan2024	4				-2.5254	-1.6338	0.8916	0.0248227	1.43637e-05	0.124384	0.0473374	0.001351	0.130313	18.26	18	17.87	17.96	18.1	18.32	18.94	18.16	18.73	19.87	16.12	15.93	16.37	16.18	17.13	17.94	17.97	4808924	313761	263003	239309	255810	281577	327796	501858	292039	433686	955558	71063.3	62233	84639.1	74376.1
A0A8V0YUR4;Q9PV94	A0A8V0YUR4_CHICK;RSMB_CHICK	SNRPN;SNRPB	Small nuclear ribonucleoprotein-associated protein;Small nuclear ribonucleoprotein-associated protein B'	Uniprot_Gallus-gallus(chicken)_Rev+Unrev51565sequences_Jan2024	10	;U5 snRNP,U1 snRNP,U2 snRNP,U4 snRNP,cytoplasm,cytosol,methylosome,SMN-Sm protein complex,U4/U6 x U5 tri-snRNP complex,U2-type prespliceosome,catalytic step 2 spliceosome	;spliceosomal snRNP assembly,mRNA splicing, via spliceosome	;RNA binding	1.4046	0.8185	-0.5861	0.0114529	0.0376461	0.000244388	0.0301355	0.060959	0.00461791	17.85	17.94	17.96	18.14	17.82	17.21	17.63	17.29	17.3	17.32	18.45	18.54	18.56	18.61	19.41	17.88	17.83	4799183	235855	250711	254949	288081	231503	151758	202518	160747	161644	163399	358031	382260	387052	399484
A0A8V0ZVB1	A0A8V0ZVB1_CHICK	TPD52L2	Tumor protein D52 like 2	Uniprot_Gallus-gallus(chicken)_Rev+Unrev51565sequences_Jan2024	23				1.0814	1.5769	0.4956	0.495679	0.396944	0.221942	0.306445	0.270081	0.189062	17.07	17.06	17.88	17.04	17.31	17.37	17.65	17.35	17.61	18.62	17.34	16.96	17.19	17.07	20.81	17.61	17.71	4795910	137304	136916	240785	134624	162838	169671	206074	167328	199791	402599	166370	127109	149159	137738
A0A1D5PGQ9	A0A1D5PGQ9_CHICK	DCTN2	Dynactin subunit 2	Uniprot_Gallus-gallus(chicken)_Rev+Unrev51565sequences_Jan2024	28				0.3831	0.1062	-0.2769	0.00130001	0.0315366	0.00726212	0.0100221	0.0548484	0.0235982	18.28	18.13	18.1	18.2	18.15	17.74	18.05	17.86	17.75	18.05	18.2	18.32	18.32	18.31	18.22	18.02	17.9	4793366	317281	286204	280875	301878	290254	219522	270551	237254	220127	271185	301827	328305	327658	325259
A0A8V0XB52;P34065	A0A8V0XB52_CHICK;PSB5_CHICK	PSMB5	Proteasome subunit beta;Proteasome subunit beta type-5 (Fragment)	Uniprot_Gallus-gallus(chicken)_Rev+Unrev51565sequences_Jan2024	20	;nucleus,cytoplasm,proteasome core complex, beta-subunit complex,proteasome core complex	;proteasome-mediated ubiquitin-dependent protein catabolic process,proteasomal protein catabolic process,proteasomal ubiquitin-independent protein catabolic process	;threonine-type endopeptidase activity,endopeptidase activity	0.6943	0.6342	-0.06	0.369812	0.399128	0.635594	0.259372	0.270984	0.35515	17.73	18.01	17.98	17.82	17.96	17.96	17.68	18.01	18.04	17.44	17.87	17.84	17.89	17.83	19.87	17.86	17.88	4789026	217143	264858	259179	231260	254973	254940	209571	264343	270325	178205	239190	233958	243679	232934
A0A8V1A685;Q5ZKJ2	A0A8V1A685_CHICK;Q5ZKJ2_CHICK	YWHAH;RCJMB04_10g10	Tyrosine 3-monooxygenase/tryptophan 5-monooxygenase activation protein eta;14-3-3 domain-containing protein	Uniprot_Gallus-gallus(chicken)_Rev+Unrev51565sequences_Jan2024	15	;extracellular space,cytoplasm,plasma membrane	;glucocorticoid catabolic process,intracellular protein transport,glucocorticoid receptor signaling pathway,positive regulation of transcription, DNA-templated,negative regulation of dendrite morphogenesis,membrane depolarization during action potential,regulation of sodium ion transmembrane transporter activity	;actin binding,sodium channel regulator activity,enzyme binding,protein domain specific binding,glucocorticoid receptor binding,identical protein binding,ion channel binding,protein heterodimerization activity	-0.4122	-0.0865	0.3257	0.0147177	0.565471	0.00501459	0.0346998	0.330961	0.01965	17.93	18	18.26	17.81	18.06	18.26	18.32	18.3	18.36	18.47	18.01	17.67	17.76	17.8	18.32	17.96	18.1	4779713	250417	262271	313083	229262	273387	312923	327655	323345	337045	363849	264235	208788	222605	227448
A0A8V0XWA8;Q6JLB2	A0A8V0XWA8_CHICK;Q6JLB2_CHICK	PSMB1	Proteasome subunit beta	Uniprot_Gallus-gallus(chicken)_Rev+Unrev51565sequences_Jan2024	16	;nucleus,cytoplasm,proteasome core complex	;proteolysis involved in cellular protein catabolic process,proteasomal ubiquitin-independent protein catabolic process,proteasomal protein catabolic process,proteasome-mediated ubiquitin-dependent protein catabolic process	;threonine-type endopeptidase activity,endopeptidase activity	0.8962	0.8546	-0.0416	0.351454	0.36609	0.665789	0.251315	0.257824	0.365195	17.72	17.93	17.89	17.63	17.78	17.79	17.68	17.81	17.95	17.49	17.8	17.75	17.81	17.91	20.11	17.88	17.87	4779254	215420	249626	243631	202947	225227	226685	210584	230063	253163	184074	227691	220529	229578	245543
A0A1D5NTD3;A0A1D5PPT0	A0A1D5NTD3_CHICK;A0A1D5PPT0_CHICK	ADRM1	Adhesion regulating molecule 1	Uniprot_Gallus-gallus(chicken)_Rev+Unrev51565sequences_Jan2024	15	;	;	;	0.6322	0.4648	-0.1674	0.239467	0.344544	0.0101748	0.197732	0.248368	0.0282961	17.89	18.09	18.05	17.92	17.97	17.73	17.83	17.89	17.85	17.78	17.96	18.04	18.14	17.95	19.47	17.91	18.03	4762173	243494	278298	272188	247190	257432	218040	232699	243356	236570	225672	255461	268987	289511	252466
A0A8V1A624	A0A8V1A624_CHICK	ATP5B	ATP synthase subunit beta	Uniprot_Gallus-gallus(chicken)_Rev+Unrev51565sequences_Jan2024	29				-0.0822	0.455	0.5373	0.843523	0.0833322	0.294838	0.423956	0.100673	0.225536	18.25	17.28	17.66	18.03	17.37	17.76	18.31	18.05	17.36	19.27	17.52	18.42	18.31	18.34	18.34	17.95	17.88	4757633	312181	158861	207082	267445	169716	221865	325575	271932	168748	630386	187594	351434	324850	332322
A0A8V0XV56;A0A8V0XZQ4	A0A8V0XV56_CHICK;A0A8V0XZQ4_CHICK	APOB	Apolipoprotein B	Uniprot_Gallus-gallus(chicken)_Rev+Unrev51565sequences_Jan2024	280	;	;	;	0.6617	0.9081	0.2464	0.0106173	0.0027971	0.278693	0.0289069	0.0147525	0.217691	17.76	17.82	17.6	17.4	17.75	18.06	17.41	17.65	17.85	18.41	18.27	18.59	18.5	18.51	18.95	17.92	17.88	4738785	222227	231136	199185	172824	220274	274151	174180	206217	236373	349473	316191	394981	371546	373189
A0A8V0ZC55	A0A8V0ZC55_CHICK	EIF3B	Eukaryotic translation initiation factor 3 subunit B	Uniprot_Gallus-gallus(chicken)_Rev+Unrev51565sequences_Jan2024	49				0.2583	-0.0226	-0.2809	0.0995351	0.765281	0.071704	0.113024	0.39875	0.0915131	18.26	18.25	18.03	18.25	18.19	18.09	17.92	18.1	18.03	17.31	17.99	18.16	18.17	18.16	18.37	17.94	17.96	4728191	313595	311572	267263	312282	298777	278798	247331	280331	268112	162948	261109	292672	294929	293582
F1NR71;Q5ZL99	F1NR71_CHICK;Q5ZL99_CHICK	PSMD7;RCJMB04_7b3	Proteasome 26S subunit, non-ATPase 7;MPN domain-containing protein (Fragment)	Uniprot_Gallus-gallus(chicken)_Rev+Unrev51565sequences_Jan2024	18	proteasome complex,nucleoplasm,proteasome regulatory particle;	proteasome-mediated ubiquitin-dependent protein catabolic process;	protein homodimerization activity;	-0.133	-0.4148	-0.2817	0.481376	0.0396624	0.0203126	0.301491	0.0630236	0.0420107	18.33	18.38	18.29	18.34	18.39	18.12	17.99	18.21	18.22	17.73	17.96	18.09	18.09	18.17	17.11	17.73	17.76	4724687	328422	340384	320750	331793	343932	285208	260881	302298	304821	216657	255352	278887	278440	295246
A0A8V1AI83	A0A8V1AI83_CHICK	LOC107050492	glutathione transferase	Uniprot_Gallus-gallus(chicken)_Rev+Unrev51565sequences_Jan2024	18				0.8714	1.7854	0.914	0.587367	0.407955	0.00806437	0.338492	0.274537	0.0249087	16.79	17.17	17.56	16.23	17.06	17.89	17.24	18.04	18.23	18.13	17.22	16.25	16.65	16.54	20.84	17.99	17.83	4723881	113505	147761	193697	76839.5	136572	242775	154663	268711	307375	285890	152610	78096.2	102532	95275
Q5ZL57	COPD_CHICK	ARCN1	Coatomer subunit delta	Uniprot_Gallus-gallus(chicken)_Rev+Unrev51565sequences_Jan2024	34	Golgi membrane,COPI vesicle coat,COPI-coated vesicle,cytosol	retrograde vesicle-mediated transport, Golgi to ER,protein transport,Golgi localization,ER to Golgi vesicle-mediated transport		0.0202	-0.0569	-0.0771	0.935011	0.814295	0.307316	0.451893	0.414913	0.231887	17.96	18.19	18.19	18.09	18.26	18.19	18.01	18.14	18.07	17.9	18.41	18.26	18.29	18.19	16.7	17.91	17.99	4712680	255666	298919	299755	278285	312974	298426	264420	288130	275415	243997	349121	313870	321144	299462
A0A8V0X119	A0A8V0X119_CHICK		rRNA 2'-O-methyltransferase fibrillarin	Uniprot_Gallus-gallus(chicken)_Rev+Unrev51565sequences_Jan2024	9				0.6757	0.1558	-0.5199	0.177709	0.678114	0.000788314	0.164036	0.369292	0.00787729	18.28	18.14	18.08	18.24	18.14	17.82	17.84	17.54	17.69	17.34	18.56	18.77	18.52	18.64	15.01	18.13	18.01	4711910	317736	287988	276770	309863	288014	231147	235099	189939	210785	165479	385335	448383	374627	407847
A0A8V1AEJ0;A3RL83;Q5ZMN0	A0A8V1AEJ0_CHICK;A3RL83_CHICK;AN32B_CHICK	ANP32B;hLAMP-1;ANP32B	Acidic leucine-rich nuclear phosphoprotein 32 family member;Acidic leucine-rich nuclear phosphoprotein 32 family member (Fragment);Acidic leucine-rich nuclear phosphoprotein 32 family member B	Uniprot_Gallus-gallus(chicken)_Rev+Unrev51565sequences_Jan2024	12	;;nucleus,extracellular matrix	;;nucleosome assembly,nucleocytoplasmic transport,regulation of apoptotic process,histone exchange,chromatin remodeling	;;histone binding,macromolecular complex binding	0.1874	1.2497	1.0623	0.864575	0.435437	5.62192e-05	0.430438	0.285072	0.00236139	17.04	17.33	17.58	16.97	17.3	18.36	18.05	18.26	18.49	18.41	17.27	16.63	16.82	16.87	20.39	17.53	17.65	4687035	134593	165032	195377	128207	161806	336414	271325	314471	368418	348694	158004	101621	115863	119761
R4GLI2	R4GLI2_CHICK	GMPR2	GMP reductase	Uniprot_Gallus-gallus(chicken)_Rev+Unrev51565sequences_Jan2024	20	GMP reductase complex	purine nucleobase metabolic process,purine nucleotide metabolic process,oxidation-reduction process	GMP reductase activity,metal ion binding	0.9753	0.6222	-0.3531	0.365657	0.509302	0.143737	0.257637	0.311355	0.142781	17.68	18.09	18.38	17.48	17.98	17.68	17.15	17.79	17.92	17.34	17.88	17.43	17.64	17.56	20.13	17.73	17.87	4684297	209976	278314	342262	183319	258492	210688	145360	226241	248090	165751	240711	177145	203978	192835
A0A8V0ZRK9;A9DAB9	A0A8V0ZRK9_CHICK;A9DAB9_CHICK	MDK;	Midkine (neurite growth-promoting factor 2);Midkine	Uniprot_Gallus-gallus(chicken)_Rev+Unrev51565sequences_Jan2024	11	;	;behavioral fear response,short-term memory,response to wounding,regulation of receptor activity,dentate gyrus development,cerebellar granular layer development,cerebral cortex development,defecation,negative regulation of neuron apoptotic process,positive regulation of transcription, DNA-templated,regulation of behavior	;growth factor activity,heparin binding	2.0835	1.5799	-0.5036	0.255413	0.312274	0.00418863	0.206132	0.234016	0.0179988	17.49	17.42	17.57	17.37	17.39	16.91	16.74	16.91	16.75	17.34	17.93	17.82	17.78	17.61	20.75	17.78	17.75	4648732	184162	174771	194911	169823	171436	123140	109565	122760	110059	165811	250303	231923	225564	200287
E1BV45	E1BV45_CHICK	RNPS1	RNA binding protein with serine rich domain 1	Uniprot_Gallus-gallus(chicken)_Rev+Unrev51565sequences_Jan2024	9	nucleoplasm,cytoplasm,ASAP complex	nuclear-transcribed mRNA catabolic process, nonsense-mediated decay,regulation of alternative mRNA splicing, via spliceosome,positive regulation of apoptotic process,negative regulation of mRNA splicing, via spliceosome,RNA splicing,mRNA splicing, via spliceosome	mRNA 3'-UTR binding	1.2297	1.0838	-0.146	0.114025	0.137007	0.489056	0.123564	0.138544	0.304123	17.74	17.48	17.69	17.77	17.6	17.29	17.95	17.25	16.93	17.89	18.31	18.23	18.05	18.45	19.84	17.9	17.73	4631457	218906	182879	211942	223784	198881	160076	253407	156129	124708	242348	325634	306415	270834	357581
A0A8V0ZM25	A0A8V0ZM25_CHICK	AGRN	Agrin	Uniprot_Gallus-gallus(chicken)_Rev+Unrev51565sequences_Jan2024	87				1.909	0.9529	-0.9561	0.000337239	0.00143849	4.3853e-06	0.00534367	0.0105186	0.000775772	17.95	17.74	17.8	17.9	17.89	16.93	17.01	16.9	16.85	16.8	18.6	18.81	18.77	18.68	19.13	17.86	17.84	4567283	252657	218455	227757	244750	243041	125128	131719	122072	118470	114278	397088	458214	447831	421443
P31335;Q5U784;Q5U785	PUR9_CHICK;Q5U784_CHICK;Q5U785_CHICK	ATIC;PURH;PURH	Bifunctional purine biosynthesis protein ATIC	Uniprot_Gallus-gallus(chicken)_Rev+Unrev51565sequences_Jan2024	40	cytosol;;	'de novo' IMP biosynthetic process;;	IMP cyclohydrolase activity,phosphoribosylaminoimidazolecarboxamide formyltransferase activity,protein homodimerization activity;;	0.5484	0.8945	0.3461	0.633019	0.492868	0.0918456	0.354148	0.30543	0.107077	17.46	17.64	17.96	16.99	17.74	18.06	17.52	18.02	18.18	17.83	17.37	17.2	16.97	16.91	20.27	17.84	17.8	4541934	179897	203735	254892	130012	219224	272466	188508	265141	296221	233230	169513	150403	128450	123224
A0A8V0ZQV0	A0A8V0ZQV0_CHICK	VAT1	Vesicle amine transport 1	Uniprot_Gallus-gallus(chicken)_Rev+Unrev51565sequences_Jan2024	19				-0.4593	-0.302	0.1573	0.145045	0.333698	0.138256	0.143674	0.243682	0.139463	17.99	17.96	18.36	18	18.03	18.35	18.3	18.24	18.26	18	18.18	17.98	17.96	18.04	15.34	17.92	17.91	4538034	260800	255065	335443	262375	267971	333073	322069	308761	314659	262300	296098	259327	254507	269420
A0A3Q3ADL7;A0A8V0XH35;A0A8V0XJU4	A0A3Q3ADL7_CHICK;A0A8V0XH35_CHICK;A0A8V0XJU4_CHICK	RPGR	Retinitis pigmentosa GTPase regulator	Uniprot_Gallus-gallus(chicken)_Rev+Unrev51565sequences_Jan2024	3	;;	;;	;;	0.7479	1.1887	0.4408	0.0515343	0.000376857	0.366816	0.0743413	0.0055838	0.258141	17.41	17.07	17	17.51	17.94	17.42	17.25	16.82	18.24	18.74	18.41	18.86	18.35	18.83	18.55	17.73	17.85	4535269	173873	137457	130689	186242	252187	175011	155465	115631	310523	438453	347776	475575	335088	465857
Q5F4A3	AN32E_CHICK	ANP32E	Acidic leucine-rich nuclear phosphoprotein 32 family member E	Uniprot_Gallus-gallus(chicken)_Rev+Unrev51565sequences_Jan2024	14	Swr1 complex,nucleus,cytoplasm,cytoplasmic vesicle	nucleosome assembly,nucleocytoplasmic transport,regulation of apoptotic process,negative regulation of catalytic activity,histone exchange,chromatin remodeling	phosphatase inhibitor activity,histone binding	0.3539	1.3713	1.0174	0.772525	0.430989	0.00253372	0.401376	0.283345	0.014096	17.02	17.2	17.55	16.92	17.14	18.13	17.96	18.04	18.16	18.63	17.26	16.43	16.41	17	20.48	17.18	17.62	4533017	133285	151035	191805	124392	144773	286734	255832	268931	292072	405109	156626	88129.2	87270.7	130828
Q5ZL35	ARGL1_CHICK	ARGLU1	Arginine and glutamate-rich protein 1	Uniprot_Gallus-gallus(chicken)_Rev+Unrev51565sequences_Jan2024	16	nucleoplasm,mitochondrion		cadherin binding	1.3067	0.9741	-0.3327	0.00511095	0.0103981	0.0118472	0.0198238	0.0286038	0.0306541	17.62	17.54	17.76	17.92	17.81	17.53	17.61	17.38	17.25	17.2	18.5	18.65	18.48	18.53	19.23	17.65	17.79	4529875	201484	190569	221521	247332	229376	189595	199477	170906	155482	150304	369560	411570	366014	378066
A0A8V0YJV4	A0A8V0YJV4_CHICK	AKR1B1	Aldo-keto reductase family 1 member B1	Uniprot_Gallus-gallus(chicken)_Rev+Unrev51565sequences_Jan2024	21				0.6953	1.7021	1.0067	0.679202	0.46468	0.00855405	0.369684	0.295862	0.0257937	16.71	17.13	17.6	16.06	17.07	17.84	17.33	18.04	18.29	18.32	16.42	15.42	15.65	15.9	20.85	17.62	17.65	4508807	107303	143591	198393	68311.5	137295	234366	164308	268663	321205	327370	87877.1	43776.5	51320.6	61197.1
A0A8V1A3D3	A0A8V1A3D3_CHICK	NAP1L4	Nucleosome assembly protein 1 like 4	Uniprot_Gallus-gallus(chicken)_Rev+Unrev51565sequences_Jan2024	20				-0.5265	-0.4609	0.0656	0.00186611	0.00847502	0.496958	0.012078	0.0256627	0.306909	18.04	18.05	18.43	18.03	18.07	18.2	18.12	18.12	18.21	18.34	17.94	17.61	17.8	17.67	17.26	17.98	17.99	4506749	270109	272014	353233	267049	275596	300424	285134	285143	303010	331161	250658	200098	227598	209224
Q5F3X4	U5S1_CHICK	EFTUD2	116 kDa U5 small nuclear ribonucleoprotein component	Uniprot_Gallus-gallus(chicken)_Rev+Unrev51565sequences_Jan2024	66	cytosol,Cajal body,nuclear speck,U4/U6 x U5 tri-snRNP complex,U2-type catalytic step 2 spliceosome	mRNA processing,RNA splicing,mRNA splicing, via spliceosome,translational elongation	GTPase activity,GTP binding	0.7888	0.2397	-0.5491	0.0652951	0.419901	0.00267731	0.086364	0.27906	0.0144372	18.21	18.01	17.96	18.25	18.07	17.6	17.84	17.66	17.51	17.05	18.41	18.66	18.51	18.65	16.8	17.8	17.85	4498694	302478	263822	255638	312139	274324	198851	234468	207429	186426	135405	348459	414906	373802	412040
A0A8V0Z6K0	A0A8V0Z6K0_CHICK	ADD3	Adducin 3 (gamma)	Uniprot_Gallus-gallus(chicken)_Rev+Unrev51565sequences_Jan2024	41				0.4804	-0.3077	-0.7882	0.0251066	0.0461411	7.8992e-06	0.0476607	0.0693173	0.00105928	18.34	18.33	18.23	18.44	18.45	17.59	17.83	17.49	17.51	17.39	18.19	18.1	18.18	18.2	17.46	17.87	17.87	4493088	330883	330381	307502	354633	357880	197041	232908	184263	187148	172243	298265	281780	297162	300795
A0A8V0XW10	A0A8V0XW10_CHICK	USP10	Ubiquitin carboxyl-terminal hydrolase	Uniprot_Gallus-gallus(chicken)_Rev+Unrev51565sequences_Jan2024	39				-0.6351	-0.5923	0.0428	0.0495279	0.0634782	0.691077	0.072538	0.0848699	0.373743	18.13	18.28	18.08	18.27	18.09	18.35	18.32	18.26	18.28	17.8	17.85	17.88	17.84	17.79	15.24	17.95	17.98	4488351	287053	319211	277032	315154	278247	332967	327591	313387	318625	228587	236837	242057	234387	227409
A0A8V0ZDA3;A0A8V0ZIS9;A0A8V0ZKE4;A0A8V0ZR83;O93480	A0A8V0ZDA3_CHICK;A0A8V0ZIS9_CHICK;A0A8V0ZKE4_CHICK;A0A8V0ZR83_CHICK;O93480_CHICK	CBX1;CBX1;CBX1;CBX1;	Chromobox 1;Chromobox 1;Chromobox 1;Chromobox 1;Chromobox protein (CHCB1)	Uniprot_Gallus-gallus(chicken)_Rev+Unrev51565sequences_Jan2024	12	;;;;nuclear chromosome, telomeric region,female pronucleus,male pronucleus,pericentric heterochromatin,spindle,chromocenter	;;;;negative regulation of transcription, DNA-templated	;;;;actin binding,protein homodimerization activity,histone methyltransferase binding	1.6064	1.0566	-0.5498	0.0635152	0.121056	0.0140464	0.0848938	0.128058	0.0337473	17.9	17.51	17.98	17.68	17.42	17.25	17.42	16.92	16.65	17.42	18.35	18.34	18.11	18.49	19.81	17.67	17.85	4486544	244684	186243	258521	209822	174903	155908	175474	123965	102971	175464	334928	331590	283278	368032
A0A1D5P0E2	A0A1D5P0E2_CHICK	SEC23A	Protein transport protein SEC23	Uniprot_Gallus-gallus(chicken)_Rev+Unrev51565sequences_Jan2024	37	Golgi membrane,COPII vesicle coat	intracellular protein transport,COPII-coated vesicle budding	zinc ion binding	0.3843	0.0639	-0.3204	0.23704	0.805016	0.0291671	0.196501	0.4121	0.052136	18.06	18.14	18.07	18.11	18.13	17.96	17.83	17.91	17.83	17.28	18.41	18.36	18.42	18.34	16.63	17.9	17.89	4485340	272363	288249	274832	283280	286329	254676	232875	246044	232774	158900	348531	336122	350531	332086
A0A8V0YZ35;Q5ZHY2	A0A8V0YZ35_CHICK;Q5ZHY2_CHICK	MYEF2	Myelin expression factor 2	Uniprot_Gallus-gallus(chicken)_Rev+Unrev51565sequences_Jan2024	35	;	;	;	0.7321	0.2524	-0.4797	0.000149946	0.0269888	0.00195973	0.00368878	0.0498271	0.0124079	17.91	18.02	18.29	17.95	18.12	17.75	17.67	17.56	17.53	17.41	18.39	18.48	18.36	18.14	18.2	17.86	17.89	4475076	246802	265777	321375	253893	285512	220223	208228	192841	189439	174118	343047	365365	337377	288709
E1BZT5	E1BZT5_CHICK	PRPF8	Pre-mRNA processing factor 8	Uniprot_Gallus-gallus(chicken)_Rev+Unrev51565sequences_Jan2024	155	U5 snRNP,U4/U6 x U5 tri-snRNP complex,U2-type catalytic step 2 spliceosome,catalytic step 2 spliceosome	spliceosomal tri-snRNP complex assembly	second spliceosomal transesterification activity,U6 snRNA binding,U1 snRNA binding,U2 snRNA binding,U5 snRNA binding,K63-linked polyubiquitin binding,pre-mRNA intronic binding	0.8033	0.2144	-0.5889	0.0798068	0.501069	0.00301543	0.097903	0.308443	0.0152691	18.14	18.03	17.92	18.34	18.07	17.64	17.82	17.57	17.47	16.96	18.4	18.64	18.58	18.61	16.47	17.9	17.85	4473736	287936	268468	248409	332658	275837	204343	231678	194410	181874	127337	346877	409680	392088	400257
A0A8V0XE68	A0A8V0XE68_CHICK	ACAT1	acetyl-CoA C-acetyltransferase	Uniprot_Gallus-gallus(chicken)_Rev+Unrev51565sequences_Jan2024	28				-1.7413	-1.0814	0.6599	0.0327496	0.00764969	0.180471	0.0560818	0.0242254	0.165679	18.38	17.83	18.22	17.87	17.36	18.02	18.04	19.12	17.93	19.37	16.85	17.3	17.3	16.93	15.37	18.05	18	4463070	340969	232256	306148	238948	168696	265120	269833	570884	249135	678522	118306	161527	161406	124569
A0A8V1AA69;H9L022	A0A8V1AA69_CHICK;H9L022_CHICK	SAFB	SAFB1 factor;Uncharacterized protein	Uniprot_Gallus-gallus(chicken)_Rev+Unrev51565sequences_Jan2024	63	;nucleus	;regulation of transcription from RNA polymerase II promoter,regulation of mRNA processing	;double-stranded DNA binding,RNA binding,sequence-specific DNA binding	1.2625	0.8323	-0.4302	0.0183446	0.0470924	0.00731404	0.0394879	0.0702084	0.0236698	17.9	17.67	17.71	17.87	17.75	17.35	17.72	17.3	17.06	17.26	18.29	18.43	18.26	18.51	19.3	17.89	17.87	4457578	244995	208267	214556	240220	220426	167471	215259	161192	136429	157176	321390	353918	313369	373039
A0A8V1A0E1	A0A8V1A0E1_CHICK	SEPTIN2	Septin	Uniprot_Gallus-gallus(chicken)_Rev+Unrev51565sequences_Jan2024	29				0.6807	0.5969	-0.0839	0.0278194	0.0391131	0.0894287	0.0506276	0.0624757	0.10532	17.81	17.86	17.76	17.79	17.86	17.83	17.63	17.77	17.77	17.66	18.56	18.54	18.6	18.57	17.56	17.76	17.88	4456287	230454	237124	222356	226701	238429	233248	202276	222930	223939	207447	387374	380531	396479	389916
Q5ZJQ5;Q5ZJQ6	Q5ZJQ5_CHICK;Q5ZJQ6_CHICK	RCJMB04_16g5;DARS	Aspartate--tRNA ligase, cytoplasmic;Aspartate--tRNA ligase, cytoplasmic	Uniprot_Gallus-gallus(chicken)_Rev+Unrev51565sequences_Jan2024	37	;cytosol,aminoacyl-tRNA synthetase multienzyme complex	;aspartyl-tRNA aminoacylation	;nucleic acid binding,aspartate-tRNA ligase activity,ATP binding,RNA binding	0.0994	-0.1585	-0.258	0.535037	0.266527	0.0182047	0.320491	0.211915	0.0392992	18.14	18.23	18.02	18.15	18.18	17.98	17.7	17.99	18.05	17.68	18.05	18.11	18.14	18.13	17.37	17.86	17.88	4443720	288424	308446	265387	291845	297058	259252	212210	260012	272077	209988	272096	282589	289368	287037
A0A8V1A986	A0A8V1A986_CHICK	CLTCL1	Clathrin heavy chain	Uniprot_Gallus-gallus(chicken)_Rev+Unrev51565sequences_Jan2024	70				0.4645	-0.184	-0.6485	0.0899103	0.384833	0.00500616	0.105682	0.265247	0.0196318	18.43	18.22	17.81	18.45	18.3	17.71	17.8	17.77	17.61	17.03	17.95	18.31	18.35	18.25	17.25	17.97	17.85	4443591	353429	304684	230239	357465	323083	214960	228733	223907	199879	133374	252789	325959	334502	312323
A0A8V1A9W4;H9L3L2	A0A8V1A9W4_CHICK;H9L3L2_CHICK	COPA	Coatomer subunit alpha	Uniprot_Gallus-gallus(chicken)_Rev+Unrev51565sequences_Jan2024	88	;Golgi membrane,extracellular space,COPI vesicle coat	;intracellular protein transport,ER to Golgi vesicle-mediated transport,retrograde vesicle-mediated transport, Golgi to ER,intra-Golgi vesicle-mediated transport,pancreatic juice secretion	;structural molecule activity	0.4669	0.1607	-0.3062	0.212108	0.598282	0.02486	0.183701	0.342092	0.0473715	17.99	18.1	18.02	18.03	18.09	17.94	17.73	17.83	17.81	17.31	18.41	18.49	18.49	18.42	16.29	17.89	17.85	4441328	261111	281109	265890	267717	278331	251470	217762	233458	230211	162270	348301	367714	367472	349836
Q5ZHR4	Q5ZHR4_CHICK	RCJMB04_34b10	Glycine--tRNA ligase	Uniprot_Gallus-gallus(chicken)_Rev+Unrev51565sequences_Jan2024	44	mitochondrion,cytosol,secretory granule,axon,extracellular exosome,cytoplasm	diadenosine tetraphosphate biosynthetic process,mitochondrial glycyl-tRNA aminoacylation,glycyl-tRNA aminoacylation	bis(5'-nucleosyl)-tetraphosphatase (asymmetrical) activity,glycine-tRNA ligase activity,ATP binding,identical protein binding,protein dimerization activity	-1.3251	-0.6508	0.6743	0.00142615	0.00127103	0.00801501	0.0104666	0.00991354	0.0248411	17.82	18.04	18.09	17.61	17.86	18.66	18.22	18.73	18.85	18.28	17.4	17.09	17.14	17.1	17.44	17.96	17.89	4436126	230662	269896	278617	200541	238476	413727	306358	433845	471940	318090	173280	139699	144304	140515
A0A8V0YR61;A0A8V0YSR9;O42283	A0A8V0YR61_CHICK;A0A8V0YSR9_CHICK;O42283_CHICK	HSPE1;HSPE1;	10 kDa heat shock protein, mitochondrial;10 kDa heat shock protein, mitochondrial;10 kDa heat shock protein, mitochondrial	Uniprot_Gallus-gallus(chicken)_Rev+Unrev51565sequences_Jan2024	13	;;	;;	;;	0.5069	1.5654	1.0586	0.690182	0.381525	0.114328	0.373439	0.264043	0.12368	17.45	16.61	17.26	16.94	16.49	17.3	17.6	18.4	17.11	18.97	16.56	17.1	17.07	17.01	20.45	17.92	17.77	4422734	179094	100270	156688	125580	92198.5	161863	198516	346062	141174	514215	96634.4	140364	137636	131624
A0A8V0YBG4	A0A8V0YBG4_CHICK	PGM5	Phosphoglucomutase 5	Uniprot_Gallus-gallus(chicken)_Rev+Unrev51565sequences_Jan2024	29				0.6171	0.3342	-0.2829	0.22124	0.45011	0.133273	0.188749	0.290379	0.136204	17.84	17.91	18.38	17.57	17.98	17.78	17.74	17.72	17.54	17.6	18.16	17.65	18.01	17.75	19.25	17.85	17.79	4396425	235251	245899	341471	194874	258124	224945	219527	215250	190733	198024	292345	205734	264741	220979
A0A8V1ALB1	A0A8V1ALB1_CHICK	AP2B1	AP complex subunit beta	Uniprot_Gallus-gallus(chicken)_Rev+Unrev51565sequences_Jan2024	39				0.4235	-0.0206	-0.4441	0.178972	0.930928	0.00163931	0.164819	0.450645	0.0112604	18.09	18.1	18.06	18.22	18.17	17.75	17.83	17.74	17.73	17.31	18.33	18.27	18.36	18.3	16.72	17.8	17.85	4365134	278806	280043	273155	305565	295624	220596	233723	219489	216897	162738	329388	316583	336091	322636
A0A8V0XTG7	A0A8V0XTG7_CHICK	PDIA4	Protein disulfide-isomerase A4	Uniprot_Gallus-gallus(chicken)_Rev+Unrev51565sequences_Jan2024	50				1.1958	1.5097	0.3139	0.381897	0.32134	0.0837565	0.264139	0.238081	0.101015	17.19	17.09	17.42	16.92	17.5	17.82	17.37	17.79	17.31	17.39	17.62	17.43	17.48	17.54	20.47	17.68	17.72	4363875	149622	139822	175329	123874	184899	230778	169668	227336	162056	171761	201830	175987	183214	190663
A0A8V0ZZ04;A0A8V1A171	A0A8V0ZZ04_CHICK;A0A8V1A171_CHICK	IGF2BP2	Insulin like growth factor 2 mRNA binding protein 2	Uniprot_Gallus-gallus(chicken)_Rev+Unrev51565sequences_Jan2024	29	;	;	;	0.5134	0.0814	-0.4319	0.194765	0.799076	0.0308898	0.173965	0.41016	0.0541254	17.8	17.97	18.38	17.89	18.29	18.01	17.5	17.52	17.56	17.6	18.41	18.54	18.45	18.21	16.21	17.81	17.87	4355147	228650	256393	340795	243036	319630	264656	185322	187991	192969	198306	349322	381511	359230	303299
P13645	SWISS-PROT:P13645		Tax_Id=9606 Gene_Symbol=KRT10 Keratin, type I cytoskeletal 10	contaminants_mq1,6_headersForSpectronaut	27				1.7107	1.4179	-0.2928	0.0727586	0.0951305	0.326252	0.0922632	0.109638	0.24021	17.59	16.5	17.74	17.35	17.57	17.79	16.86	16.81	16.95	16.9	18.67	18.01	17.92	18.66	19.9	17.67	17.81	4339373	196724	92934.5	218396	166582	194499	226919	119076	114721	126598	122171	416703	263076	248009	414568
A0A8V0ZZV1	A0A8V0ZZV1_CHICK	PSMD11	26S proteasome non-ATPase regulatory subunit 11	Uniprot_Gallus-gallus(chicken)_Rev+Unrev51565sequences_Jan2024	32				0.0842	-0.2757	-0.3599	0.664261	0.143764	0.00113522	0.364676	0.142781	0.00938135	18.24	18.25	18.14	18.1	18.17	17.72	17.93	17.95	17.87	17.61	17.96	18.12	18.09	18.07	17.03	17.86	17.8	4338329	310625	311236	288344	280974	294832	216551	249537	252372	240034	199419	254643	284213	279238	275757
A0A8V0ZKK9	A0A8V0ZKK9_CHICK	ARPC4	Actin-related protein 2/3 complex subunit 4	Uniprot_Gallus-gallus(chicken)_Rev+Unrev51565sequences_Jan2024	11				0.113	0.437	0.3241	0.479109	0.0497384	0.0032052	0.300874	0.0727283	0.0157585	17.63	17.75	17.92	17.54	17.82	17.98	18.12	18.13	18.04	18.03	18.17	17.99	18.02	17.95	18.63	17.51	17.63	4332978	202884	220700	248170	190044	231985	259275	284903	286367	270250	268470	295411	260839	265706	253097
P68139	ACTS_CHICK	ACTA1	Actin, alpha skeletal muscle	Uniprot_Gallus-gallus(chicken)_Rev+Unrev51565sequences_Jan2024	2	stress fiber,striated muscle thin filament,actin filament	skeletal muscle thin filament assembly,skeletal muscle fiber development	protein binding,ATP binding	0.6829	0.2779	-0.405	0.00234162	0.144958	0.0762304	0.0135411	0.143628	0.0949431	18.36	17.72	17.67	17.83	18.28	17.53	17.57	17.56	17.86	17.42	18.29	18.35	18.17	18.55	17.97	17.69	17.8	4328974	336786	215247	207961	232983	317730	189611	195224	192754	237508	174825	320360	335158	294255	382711
P24367	PPIB_CHICK	PPIB	Peptidyl-prolyl cis-trans isomerase B	Uniprot_Gallus-gallus(chicken)_Rev+Unrev51565sequences_Jan2024	16	endoplasmic reticulum lumen,macromolecular complex,melanosome	protein peptidyl-prolyl isomerization,chaperone-mediated protein folding,protein stabilization	peptidyl-prolyl cis-trans isomerase activity,macromolecular complex binding,collagen binding	0.7918	1.1092	0.3175	0.42522	0.322208	0.0614543	0.281013	0.238457	0.082979	17.34	17.4	17.72	17.3	17.43	17.63	17.7	17.76	17.53	18.12	17.7	17.6	17.58	17.61	20.09	17.58	17.65	4325926	165400	172685	215418	160963	176549	202428	212382	221304	188654	285565	212629	198784	196153	199736
A0A8V0ZL09	A0A8V0ZL09_CHICK	SORBS1	Sorbin and SH3 domain containing 1	Uniprot_Gallus-gallus(chicken)_Rev+Unrev51565sequences_Jan2024	82				-1.8045	-0.982	0.8225	0.0384983	0.00482744	0.143345	0.0618443	0.019267	0.142537	17.98	17.51	17.92	17.69	18	18.09	18.79	17.82	18.31	19.57	16.49	16.53	16.52	16.58	17.7	17.88	17.91	4315252	259286	186971	248590	211481	262421	279082	453445	230839	323945	779518	92303.7	94658.1	93902.1	97763
P08636	RS17_CHICK	RPS17	Small ribosomal subunit protein eS17	Uniprot_Gallus-gallus(chicken)_Rev+Unrev51565sequences_Jan2024	13	cytosolic small ribosomal subunit	ribosomal small subunit assembly,rRNA processing,translation,erythrocyte homeostasis	structural constituent of ribosome	-0.4637	-0.3261	0.1376	0.0673978	0.0105392	0.474471	0.0879389	0.0287813	0.299341	17.96	17.9	17.99	17.99	18.23	18	18.17	18.02	17.77	18.66	17.64	17.82	17.86	17.7	17.39	17.79	17.9	4314600	254173	244043	260066	260239	308257	262371	294506	265768	223311	413622	204408	231772	238147	212223
A0A8V1ADR4;Q9IAU4	A0A8V1ADR4_CHICK;Q9IAU4_CHICK	COL5A1;	Collagen type V alpha 1 chain;Alpha 1 (V) collagen	Uniprot_Gallus-gallus(chicken)_Rev+Unrev51565sequences_Jan2024	27	;	;	;	-0.1811	0.7291	0.9103	0.636181	0.0655414	0.0721442	0.355301	0.0865248	0.0918264	17.26	17.24	17.86	16.87	17.5	18.2	18.17	17.69	17.86	19.1	18.11	18.01	17.99	17.35	18.76	17.7	17.73	4310935	157344	154861	237769	120161	185081	301394	295500	211575	237344	561493	282857	263234	260459	167034
A0A8V1A7Y0;A0A8V1ACZ4	A0A8V1A7Y0_CHICK;A0A8V1ACZ4_CHICK	ILF2	Interleukin enhancer binding factor 2	Uniprot_Gallus-gallus(chicken)_Rev+Unrev51565sequences_Jan2024	27	;	;	;	0.8582	0.5605	-0.2978	0.116575	0.225534	0.0320399	0.125064	0.190746	0.0553872	17.85	17.75	17.89	17.96	17.73	17.56	17.81	17.61	17.51	17.13	18.55	18.83	18.66	18.71	15.27	17.63	17.7	4272400	236484	220660	243295	255585	217104	193776	230444	200285	186198	143644	384711	465355	413125	427342
A0A8V1AMS0	A0A8V1AMS0_CHICK	C1QBP	Complement component 1 Q subcomponent-binding protein, mitochondrial	Uniprot_Gallus-gallus(chicken)_Rev+Unrev51565sequences_Jan2024	7				0.6493	0.6416	-0.0077	0.489224	0.496395	0.984237	0.304158	0.306687	0.466522	18.45	17.29	17.11	18.07	17.12	17.17	17.8	18.24	16.88	18.02	17.05	17.6	17.55	17.53	19.88	17.67	17.82	4265236	357428	160456	141066	275303	142104	147374	227858	308666	120399	266343	135688	198262	192102	188866
Q5ZK10	NSF1C_CHICK	NSFL1C	NSFL1 cofactor p47	Uniprot_Gallus-gallus(chicken)_Rev+Unrev51565sequences_Jan2024	33	nucleus,nucleoplasm,Golgi stack,cytosol,plasma membrane,intermediate filament cytoskeleton	autophagosome assembly,Golgi organization,nuclear envelope reassembly,proteasome-mediated ubiquitin-dependent protein catabolic process,regulation of phosphoprotein phosphatase activity,membrane fusion	lipid binding,protein phosphatase regulator activity,ubiquitin binding	0.0307	0.5957	0.565	0.962389	0.453717	0.0666408	0.460046	0.291621	0.0873541	17.28	17.44	17.98	17.32	17.56	17.92	18.03	17.83	17.85	18.7	17.74	17.22	17.12	17.41	19.52	17.79	17.79	4256406	159426	177402	259364	163276	193698	247791	267930	233171	235744	425468	218784	152904	142404	174336
Q5ZIK9	COPE_CHICK	COPE	Coatomer subunit epsilon	Uniprot_Gallus-gallus(chicken)_Rev+Unrev51565sequences_Jan2024	20	Golgi membrane,nucleoplasm,COPI vesicle coat	ER to Golgi vesicle-mediated transport,retrograde vesicle-mediated transport, Golgi to ER,intra-Golgi vesicle-mediated transport,protein transport	structural molecule activity	0.8743	0.4333	-0.441	1.5869e-05	0.00127562	0.00318019	0.00137497	0.00992683	0.0157239	17.95	17.92	17.88	17.84	17.93	17.34	17.74	17.34	17.28	17.55	18.42	18.34	18.36	18.41	18.12	17.92	17.79	4255764	253302	247586	240514	234343	249083	166191	219159	165372	159549	191942	351705	330782	337288	348341
Q5ZLI2	Q5ZLI2_CHICK	PSMA3	Proteasome subunit alpha type	Uniprot_Gallus-gallus(chicken)_Rev+Unrev51565sequences_Jan2024	17	nucleus,cytoplasm,proteasome core complex, alpha-subunit complex,synapse,proteasome core complex	ubiquitin-dependent protein catabolic process,regulation of endopeptidase activity,proteasomal protein catabolic process,proteasomal ubiquitin-independent protein catabolic process,proteasome-mediated ubiquitin-dependent protein catabolic process	threonine-type endopeptidase activity,endopeptidase activity	0.5164	0.4346	-0.0818	0.45043	0.509158	0.457242	0.290482	0.3113	0.292967	17.71	17.89	17.98	17.71	17.76	17.8	17.64	17.82	17.95	17.4	17.6	17.51	17.64	17.68	19.53	17.8	17.8	4255763	214653	243460	258201	214034	222117	228183	203751	231461	252350	173175	198244	187156	204099	210005
A0A8V0ZMC0;P84169	A0A8V0ZMC0_CHICK;PSD13_CHICK	PSMD13	26S proteasome non-ATPase regulatory subunit 13	Uniprot_Gallus-gallus(chicken)_Rev+Unrev51565sequences_Jan2024	30	;nucleus,cytosol,proteasome regulatory particle, lid subcomplex,proteasome accessory complex	;ubiquitin-dependent protein catabolic process,meiosis I,proteasome assembly	;structural molecule activity	0.0266	-0.3036	-0.3302	0.908956	0.163889	0.0200374	0.443917	0.155884	0.0417006	18.23	18.27	18.05	18.14	17.98	17.8	17.79	17.94	18.04	17.39	17.89	18.02	18.15	17.97	16.76	17.94	17.83	4243804	306451	316278	272319	287883	259344	227561	227171	252238	268705	171582	243107	265716	291868	256994
A0A1D5PBY3;A0A8V0X8L4;A0A8V0XBN9;A0A8V0XEE4	A0A1D5PBY3_CHICK;A0A8V0X8L4_CHICK;A0A8V0XBN9_CHICK;A0A8V0XEE4_CHICK	PRDX3	Thioredoxin-dependent peroxide reductase, mitochondrial;Thioredoxin-dependent peroxide reductase, mitochondrial;Thioredoxin-dependent peroxide reductase, mitochondrial;Thioredoxin-dependent peroxide reductase, mitochondrial	Uniprot_Gallus-gallus(chicken)_Rev+Unrev51565sequences_Jan2024	11	;;;	;;;	;;;	-0.3287	-0.2478	0.0809	0.43135	0.532445	0.807438	0.283428	0.319587	0.412925	18.58	17.69	17.64	18.2	17.55	17.68	18.14	18.71	17.29	18.13	16.96	17.52	17.56	17.42	18.66	17.8	17.88	4243355	391410	211074	204956	301852	192301	209943	289847	430235	160572	286022	127284	187330	192810	175332
A0A8V0XGR0;A0A8V0XGR4;A0A8V0XNA5;A0A8V0XR10;A0A8V0XR15;A0A8V0XTH8;Q5ZIA2	A0A8V0XGR0_CHICK;A0A8V0XGR4_CHICK;A0A8V0XNA5_CHICK;A0A8V0XR10_CHICK;A0A8V0XR15_CHICK;A0A8V0XTH8_CHICK;MAP7_CHICK	MAP7	Microtubule associated protein 7;Microtubule associated protein 7;Microtubule associated protein 7;Microtubule associated protein 7;Microtubule associated protein 7;Microtubule associated protein 7;Ensconsin	Uniprot_Gallus-gallus(chicken)_Rev+Unrev51565sequences_Jan2024	2	;;;;;;microtubule,microtubule cytoskeleton,perinuclear region of cytoplasm	;;;;;;microtubule cytoskeleton organization	;;;;;;structural molecule activity	-1.0699	2.108	3.1779	0.192105	0.320771	0.00130275	0.172511	0.237835	0.0100256	NA	15.94	15.99	15.77	NA	19.42	18.75	19.03	19.39	18.63	16.87	16.59	NA	NA	19.13	18.08	17.71	4237742	1	62758.4	64860.5	56057.7	1	703271	440408	534544	687656	404590	119373	98956.3	1	1
A0A8V0Y1R2	A0A8V0Y1R2_CHICK		Ribonucloprotein	Uniprot_Gallus-gallus(chicken)_Rev+Unrev51565sequences_Jan2024	3				0.5966	0.5599	-0.0367	0.0232652	0.02714	0.721027	0.0455157	0.050002	0.38381	17.58	17.54	17.84	17.94	17.8	17.58	17.83	17.65	17.58	17.88	18.39	18.46	18.33	18.56	17.63	17.68	17.83	4236255	195841	191077	234171	250899	227538	195967	233809	205812	195954	240394	343604	359787	329761	385277
A0A8V1A3Y5;Q9DEQ6	A0A8V1A3Y5_CHICK;Q9DEQ6_CHICK	EIF2S2;EIF2B	Eukaryotic translation initiation factor 2 subunit 2	Uniprot_Gallus-gallus(chicken)_Rev+Unrev51565sequences_Jan2024	37	;eukaryotic translation initiation factor 2 complex	;male germ cell proliferation,translational initiation,male gonad development	;translation initiation factor activity	-0.1664	-0.0703	0.0961	0.0284468	0.0392616	0.128606	0.0513055	0.062613	0.133193	17.84	17.96	17.96	17.93	17.98	18.16	17.99	18.06	18.06	17.87	17.89	17.86	17.87	17.84	17.85	17.74	17.79	4229698	235340	255001	254316	249520	258390	292729	261045	272983	273081	239012	243498	238423	240203	235191
A0A8V0YUG5	A0A8V0YUG5_CHICK	UCHL1	Ubiquitin carboxyl-terminal hydrolase	Uniprot_Gallus-gallus(chicken)_Rev+Unrev51565sequences_Jan2024	18				1.9153	2.527	0.6118	0.409374	0.358934	0.0497912	0.274939	0.254805	0.0727699	16.17	16.63	17.09	15.84	16.52	16.96	16.54	17.18	17.58	17.17	17.22	16.51	16.33	16.72	21.11	17.4	17.43	4227639	73867.9	101536	139507	58797.1	93939.4	127927	95367.3	148186	195440	147717	152362	93511.8	82457.8	107957
A0A1D5PFA5;A0A8V1ABU9;A0A8V1AH49;A0A8V1ALB2;A4UNW1	A0A1D5PFA5_CHICK;A0A8V1ABU9_CHICK;A0A8V1AH49_CHICK;A0A8V1ALB2_CHICK;A4UNW1_CHICK	MYL10;MYL10;MYL10;MYL10;Myl2	Myosin, light chain 10, regulatory;Myosin, light chain 10, regulatory;Myosin, light chain 10, regulatory;Myosin, light chain 10, regulatory;Myosin light chain 2	Uniprot_Gallus-gallus(chicken)_Rev+Unrev51565sequences_Jan2024	8	;;;;	;;;;	calcium ion binding;;;;	0.4141	0.3359	-0.0782	0.639915	0.650413	0.896814	0.356504	0.360083	0.440156	17.87	17.61	17.43	18.32	17.87	16.7	17.19	16.86	17.4	19.12	17.21	17.35	17.7	17.33	19.6	17.81	17.56	4217306	240039	199490	176484	326730	239542	106832	149740	119058	173521	570748	151166	166886	213360	164545
P67869	CSK2B_CHICK	CSNK2B	Casein kinase II subunit beta	Uniprot_Gallus-gallus(chicken)_Rev+Unrev51565sequences_Jan2024	8	protein kinase CK2 complex,PcG protein complex	Wnt signaling pathway,regulation of protein kinase activity	protein binding,protein kinase regulator activity,metal ion binding	0.6741	0.1827	-0.4913	4.02376e-05	0.0207629	0.000550209	0.00205407	0.0425354	0.00660809	18.02	17.81	18.16	17.99	18.04	17.48	17.74	17.58	17.4	17.36	18.22	18.21	18.21	18.1	18.22	17.85	17.79	4216250	265546	230043	293300	259912	269669	182757	218903	195543	173002	167709	305224	303330	302470	281136
Q90ZG0	Q90ZG0_CHICK	FKBP12	peptidylprolyl isomerase	Uniprot_Gallus-gallus(chicken)_Rev+Unrev51565sequences_Jan2024	8	cell,cytoplasm,cytosol,terminal cisterna,membrane,Z disc,axon,sarcoplasmic reticulum membrane,perikaryon,intracellular membrane-bounded organelle,extracellular exosome	protein peptidyl-prolyl isomerization,liver development,negative regulation of protein phosphorylation,heart morphogenesis,muscle contraction,SMAD protein complex assembly,brain development,heart development,embryo development ending in birth or egg hatching,negative regulation of cardiac muscle hypertrophy,positive regulation of cardiac muscle adaptation,regulation of release of sequestered calc…	peptidyl-prolyl cis-trans isomerase activity,signal transducer activity,protein binding,FK506 binding,drug binding,calcium channel inhibitor activity,protein homodimerization activity,ion channel binding,SMAD binding,activin binding	0.7866	3.1853	2.3987	0.684135	0.403085	0.0279497	0.371487	0.272491	0.0507643	15.29	15.53	16.23	14.9	15.61	17.6	17.19	17.7	17.8	18.94	14.5	13.78	14.09	14.86	21.03	17.53	17.59	4149438	40122.9	47169.9	76837.4	30579	50145.8	197996	149976	212426	228241	502560	23207.9	14050.8	17442.5	29670.8
A0A8V0XA37;A0A8V0XD34	A0A8V0XA37_CHICK;A0A8V0XD34_CHICK	TOP2B	DNA topoisomerase 2	Uniprot_Gallus-gallus(chicken)_Rev+Unrev51565sequences_Jan2024	100	;	;	;	0.7952	0.5082	-0.2869	0.113244	0.231552	0.0348594	0.12302	0.19372	0.0581754	17.79	17.76	17.73	18.04	17.6	17.56	17.64	17.62	17.53	17.13	18.56	18.68	18.56	18.49	15.72	17.79	17.8	4134245	227282	222351	216942	270097	198628	193138	203776	201143	189017	143462	385721	419099	386821	369037
A0A8V0ZMW2;A0A8V0ZMW7	A0A8V0ZMW2_CHICK;A0A8V0ZMW7_CHICK	LEO1	RNA polymerase-associated protein LEO1	Uniprot_Gallus-gallus(chicken)_Rev+Unrev51565sequences_Jan2024	12	;	;	;	0.4874	0.7517	0.2642	0.518633	0.369969	0.184075	0.314713	0.259372	0.167804	17.68	17.49	17.73	17.4	17.26	17.71	17.88	17.35	17.65	18.2	17.69	17.54	17.36	17.52	19.65	17.84	17.84	4121604	209625	183537	217119	172738	156936	213753	241711	166675	205056	301692	211812	190778	168053	187781
A0A8V0X8R6	A0A8V0X8R6_CHICK	TRA2A	Transformer 2 alpha homolog	Uniprot_Gallus-gallus(chicken)_Rev+Unrev51565sequences_Jan2024	18				1.2838	0.7922	-0.4916	1.93722e-05	0.000130027	0.0209452	0.00148413	0.00345817	0.0427051	17.91	17.52	17.59	17.8	17.65	17.06	17.59	17.05	16.66	17.51	18.48	18.62	18.22	18.57	18.56	17.88	17.59	4113298	247042	187833	197395	228842	206262	137085	196780	135299	103302	186692	365730	401546	305806	389473
A0A8V0ZQJ0	A0A8V0ZQJ0_CHICK	CORO1C	Coronin	Uniprot_Gallus-gallus(chicken)_Rev+Unrev51565sequences_Jan2024	32				-0.2052	-0.2503	-0.0451	0.457487	0.337241	0.687199	0.293083	0.245216	0.372528	18.03	17.97	17.9	18.05	18	18.11	17.92	18.11	18.02	17.5	17.92	17.95	17.99	18.03	16.05	17.77	17.75	4108800	267893	257514	244682	271537	262657	282104	248424	282178	266564	184888	248425	252632	260054	267573
F1NU79	F1NU79_CHICK	PSMC5	26S proteasome regulatory subunit 8	Uniprot_Gallus-gallus(chicken)_Rev+Unrev51565sequences_Jan2024	28	proteasome regulatory particle, base subcomplex,cytoplasmic vesicle,nuclear proteasome complex,cytosolic proteasome complex,postsynapse	ER-associated ubiquitin-dependent protein catabolic process,negative regulation of transcription, DNA-templated,positive regulation of RNA polymerase II transcriptional preinitiation complex assembly,positive regulation of proteasomal protein catabolic process,modulation of synaptic transmission	ATP binding,TBP-class protein binding,thyrotropin-releasing hormone receptor binding,proteasome-activating ATPase activity	-0.1594	-0.4089	-0.2495	0.368591	0.0417731	0.00140434	0.25894	0.0652167	0.0104195	18.07	18.21	18.03	18.1	18.13	17.85	17.81	17.93	17.96	17.72	17.77	17.91	17.96	17.75	16.88	17.76	17.7	4101914	274260	303864	267947	280107	287266	236772	230184	249865	255703	216452	222939	246299	254865	219818
A0A1L1RSB5	A0A1L1RSB5_CHICK	SNRPF	Sm protein F	Uniprot_Gallus-gallus(chicken)_Rev+Unrev51565sequences_Jan2024	5				0.792	0.681	-0.111	0.11731	0.150652	0.407958	0.125468	0.147382	0.274537	17.75	17.67	17.6	17.73	17.6	17.5	17.91	17.28	17.31	17.7	17.87	17.91	18.2	18.04	19.23	17.64	17.69	4100291	219846	209251	199137	218027	198111	185583	246614	159262	162870	212724	240018	246508	301899	270449
A0A8V0XM45	A0A8V0XM45_CHICK	ACIN1	SAP domain-containing protein	Uniprot_Gallus-gallus(chicken)_Rev+Unrev51565sequences_Jan2024	45				0.8309	0.5086	-0.3223	0.00778568	0.0343872	0.0150456	0.0244798	0.0577777	0.0351283	17.83	17.67	17.74	17.99	17.74	17.49	17.78	17.39	17.31	17.35	18.16	18.24	18.09	18.16	18.77	17.69	17.71	4095481	232270	208609	218625	260093	219188	184306	225696	172119	162167	166518	292834	309037	278787	291962
P02789	TRFE_CHICK		Ovotransferrin	Uniprot_Gallus-gallus(chicken)_Rev+Unrev51565sequences_Jan2024	61	extracellular space,cell,extracellular matrix,signal recognition particle receptor complex	iron ion transport,intracellular sequestering of iron ion,extracellular sequestering of iron ion,acute-phase response,antimicrobial humoral response,response to lipopolysaccharide,response to drug	iron ion binding,protein binding,ferric iron binding,signal recognition particle binding	-0.1982	1.3297	1.5278	0.845345	0.435315	0.00717369	0.424523	0.285062	0.0235236	16.75	16.59	16.77	16.53	17.23	18.86	17.61	18.17	18.4	18.31	16.36	16.43	16.44	16.43	20.04	17.71	17.7	4069033	110543	98881.8	111737	94862.8	153290	475219	200593	294868	346653	324301	84282.2	88315.1	88793.8	88079.9
Q7RTT2;Q8N1N4-2	TREMBL:Q7RTT2;SWISS-PROT:Q8N1N4-2		Tax_Id=9606 Gene_Symbol=KRT78 Keratin-78;Tax_Id=9606 Gene_Symbol=KRT78 Isoform 2 of Keratin, type II cytoskeletal 78	contaminants_mq1,6_headersForSpectronaut;contaminants_mq1,6_headersForSpectronaut	9	;	;	;	2.2347	2.5575	0.3228	0.1368	0.12175	0.533382	0.138412	0.128513	0.319873	14.26	15.46	17.24	16.54	16.97	17.58	16.2	16.15	16.89	16.44	17.78	18.14	17.53	20.39	19.02	17.81	17.77	4059797	19679.4	45053.7	154968	95365.4	127974	196352	75075.1	72630.8	121276	88801.9	224716	289792	188721	1.37306e+06
A0A8V1A0V3;A0A8V1AB71;B6ZLK1;Q04678	A0A8V1A0V3_CHICK;A0A8V1AB71_CHICK;B6ZLK1_CHICK;SSRP1_CHICK	SSRP1	FACT complex subunit SSRP1	Uniprot_Gallus-gallus(chicken)_Rev+Unrev51565sequences_Jan2024	36	;;nucleus,chromosome;chromosome,nucleolus,nucleus	;;DNA replication,DNA repair,transcription, DNA-templated,regulation of transcription, DNA-templated;DNA replication,DNA repair,transcription, DNA-templated,regulation of transcription, DNA-templated,chromatin remodeling	;;DNA binding,chromatin binding;DNA binding,chromatin binding	0.7532	0.3993	-0.3539	0.102971	0.281879	0.048141	0.115529	0.219249	0.0713118	17.9	17.74	17.66	18.05	17.75	17.75	17.69	17.52	17.36	16.89	18.36	18.58	18.42	18.54	16.16	17.84	17.69	4051639	245012	218476	206632	271760	220316	219779	211647	188328	168164	121455	337068	390636	350417	381467
Q5F3B6	Q5F3B6_CHICK	RCJMB04_23b17	Protein RCC2 (Fragment)	Uniprot_Gallus-gallus(chicken)_Rev+Unrev51565sequences_Jan2024	24				0.4068	0.6498	0.2429	0.578039	0.420557	0.0870421	0.335378	0.279318	0.103619	17.51	17.65	17.68	17.47	17.55	18	17.73	17.89	17.97	17.42	17.57	17.41	17.42	17.5	19.61	17.59	17.57	4050249	186407	205010	210206	182038	191300	262594	217780	242123	256074	175203	194328	174348	174967	185706
A0A8V0Y5A6	A0A8V0Y5A6_CHICK	ACTN4	Alpha-actinin-4	Uniprot_Gallus-gallus(chicken)_Rev+Unrev51565sequences_Jan2024	54				0.8128	0.1884	-0.6244	0.0511755	0.488143	0.000265515	0.0740428	0.303779	0.00479255	18.03	17.93	17.78	18.12	18.06	17.48	17.56	17.41	17.27	17.03	18.3	18.41	18.41	18.43	16.75	17.68	17.68	4043209	266852	250114	224811	285041	272575	183320	193538	174557	157566	133921	322256	347443	348973	351957
A0A8V0Z1D6;A0A8V0Z7U1;D5M8S2	A0A8V0Z1D6_CHICK;A0A8V0Z7U1_CHICK;D5M8S2_CHICK	PARK7;PARK7;DJ-1	protein deglycase	Uniprot_Gallus-gallus(chicken)_Rev+Unrev51565sequences_Jan2024	22	;;chromatin,mitochondrial respiratory chain complex I,mitochondrial intermembrane space,mitochondrial matrix,endoplasmic reticulum,cytosol,cell-cell adherens junction,PML body,neuron projection,cell body,perinuclear region of cytoplasm,presynapse,nucleus,mitochondrion	;;positive regulation of acute inflammatory response to antigenic stimulus,DNA repair,negative regulation of protein kinase activity,proteolysis,protein deglycosylation,mitochondrion organization,adult locomotory behavior,detoxification of copper ion,negative regulation of gene expression,enzyme active site formation via L-cysteine sulfinic acid,insulin secretion,negative regulation of protein bi…	;;transcription coactivator activity,mRNA binding,peptidase activity,superoxide dismutase copper chaperone activity,kinase binding,cytokine binding,tyrosine 3-monooxygenase activator activity,L-dopa decarboxylase activator activity,protein deglycase activity,protein homodimerization activity,small protein activating enzyme binding,ubiquitin-like protein conjugating enzyme binding,cadherin binding…	0.5329	1.7451	1.2122	0.730895	0.447083	0.0157766	0.387108	0.28917	0.0361158	16.45	16.82	17.31	16.03	16.78	17.67	17.24	17.91	18.06	18.55	16.35	15.68	15.61	15.88	20.6	17.55	17.64	4041930	89464.2	115525	162139	66800	112794	209117	154748	246216	272808	383781	83243.8	52469.4	49917.4	60178.9
A0A8V0ZUX9;A0A8V0ZW78	A0A8V0ZUX9_CHICK;A0A8V0ZW78_CHICK	USP5	Ubiquitin carboxyl-terminal hydrolase	Uniprot_Gallus-gallus(chicken)_Rev+Unrev51565sequences_Jan2024	57	;	;	;	-1.4575	-0.6456	0.812	0.00068129	0.0418703	0.00571922	0.00733434	0.0653006	0.0209262	17.57	17.86	18	17.3	17.58	18.54	18.09	18.57	18.87	18.3	17.53	17.07	17.15	17.3	15.32	17.8	17.77	4030512	194935	238641	262908	161451	196194	379908	278977	389616	478893	323264	189190	137199	145234	161325
F1NWZ2	F1NWZ2_CHICK	CSRP3	Cysteine and glycine rich protein 3	Uniprot_Gallus-gallus(chicken)_Rev+Unrev51565sequences_Jan2024	18	Z disc	regulation of the force of heart contraction,cardiac muscle hypertrophy,cellular calcium ion homeostasis,protein localization to organelle,detection of muscle stretch,positive regulation of transcription from RNA polymerase II promoter,cardiac myofibril assembly,cardiac muscle contraction	structural constituent of muscle,telethonin binding,identical protein binding,actinin binding,metal ion binding	-0.9322	0.9512	1.8834	0.289738	0.538808	0.00682374	0.223119	0.3218	0.0229692	16.56	16.85	17.06	16.2	16.83	18.34	18.14	18.47	18.59	19.25	16.1	15.57	15.8	15.89	19.63	17.67	17.77	4030071	96721.3	117741	136954	75148.9	116563	331972	288875	363854	394600	624538	70469.5	48619.2	57120.2	60795.2
A0A8V0ZQD9	A0A8V0ZQD9_CHICK	CORO1B	Coronin	Uniprot_Gallus-gallus(chicken)_Rev+Unrev51565sequences_Jan2024	17				-0.4597	-0.2731	0.1866	0.102968	0.293251	0.160383	0.115529	0.224768	0.153712	17.9	17.88	17.95	17.79	17.95	18.29	18.04	18.22	18.12	17.66	17.95	17.84	17.76	17.84	15.98	17.56	17.75	4028626	244912	240718	254007	226678	252425	320339	269514	304895	284513	207787	252558	234447	221710	235227
A0A8V0ZMT8;Q5ZIZ7	A0A8V0ZMT8_CHICK;Q5ZIZ7_CHICK	DNAJA2	DnaJ heat shock protein family (Hsp40) member A2	Uniprot_Gallus-gallus(chicken)_Rev+Unrev51565sequences_Jan2024	19	;cytosol	;response to heat,positive regulation of ATPase activity,protein refolding	;ATPase activator activity,ATP binding,heat shock protein binding,metal ion binding,unfolded protein binding,chaperone binding	-1.1412	-1.0312	0.11	0.000250643	0.00028604	0.254684	0.00468543	0.00492787	0.205747	18.23	17.91	17.89	18.07	18.3	18.18	18.22	18.12	18.18	18.29	16.89	17.37	17.42	17.01	16.36	17.78	17.64	4011868	308064	245797	242937	274990	323204	297466	305190	285293	296245	321345	121609	169279	175910	131877
A0A8V0X8X8	A0A8V0X8X8_CHICK	GATD3AL1	Putative glutamine amidotransferase like class 1 domain containing 3A-like1	Uniprot_Gallus-gallus(chicken)_Rev+Unrev51565sequences_Jan2024	18				0.1388	1.344	1.2052	0.900769	0.426203	0.0075472	0.441233	0.281397	0.0240697	16.54	16.99	17.46	16.11	17.09	17.8	17.54	18.08	18.35	18.58	17.05	16.28	16.34	16.59	20.16	17.57	17.64	4001684	95329.3	130114	180124	70882.5	139939	227691	190209	276918	334388	391980	135904	79653	82847	98816.9
A0A8V0Z5E8;A0A8V0ZCX8	A0A8V0Z5E8_CHICK;A0A8V0ZCX8_CHICK	DNPEP	Aspartyl aminopeptidase	Uniprot_Gallus-gallus(chicken)_Rev+Unrev51565sequences_Jan2024	28	;	;	;	0.4967	0.5694	0.0727	0.623821	0.584257	0.565366	0.351128	0.33753	0.330921	17.58	17.78	17.84	17.4	17.52	17.79	17.39	17.87	17.86	17.57	17.16	16.98	17.05	17.04	19.88	17.69	17.56	4000522	196536	224511	234142	173514	188121	226595	171458	238743	238337	194228	146155	129425	135235	135103
P62207	PP1B_CHICK	PPP1CB	Serine/threonine-protein phosphatase PP1-beta catalytic subunit	Uniprot_Gallus-gallus(chicken)_Rev+Unrev51565sequences_Jan2024	14	protein phosphatase type 1 complex,nucleus,PTW/PP1 phosphatase complex	glycogen metabolic process,protein dephosphorylation,cell cycle,regulation of cell adhesion,cell division	myosin phosphatase activity,metal ion binding,myosin-light-chain-phosphatase activity	0.5621	0.2168	-0.3453	0.214684	0.558845	2.33195e-05	0.185117	0.328651	0.0015749	17.88	17.93	17.9	17.8	17.88	17.52	17.62	17.6	17.49	17.44	17.76	17.74	17.67	17.79	19	17.74	17.75	3992122	240440	249560	244688	228997	240851	187874	201033	198101	183651	177487	221762	218741	208252	226302
E1C8Y3	E1C8Y3_CHICK	ARPC3	Actin-related protein 2/3 complex subunit 3	Uniprot_Gallus-gallus(chicken)_Rev+Unrev51565sequences_Jan2024	14	cytoplasm,Arp2/3 protein complex,lamellipodium	Arp2/3 complex-mediated actin nucleation	structural constituent of cytoskeleton,actin filament binding	0.244	0.5717	0.3277	0.455012	0.153282	0.00995698	0.29211	0.149114	0.02801	17.39	17.41	17.64	17.58	17.71	17.94	17.83	18.04	17.94	17.62	17.95	17.64	17.88	17.83	18.92	17.55	17.61	3988905	172187	174036	204669	196364	213857	250873	233242	268890	252067	201154	253139	204688	241880	233365
A0A8V0ZQF5	A0A8V0ZQF5_CHICK	STK16	non-specific serine/threonine protein kinase	Uniprot_Gallus-gallus(chicken)_Rev+Unrev51565sequences_Jan2024	5				-0.4573	-0.9774	-0.5201	0.37192	0.0026274	0.194352	0.260213	0.0142875	0.173785	18.58	17.98	18.04	18.52	18.46	17.05	17.59	17.26	17.54	18.86	17.26	17.27	17.25	17.62	NA	18.12	17.64	3971996	393198	257809	269636	375298	359429	135719	196638	157063	190526	474362	156706	158341	155780	201784
A0A8V0ZKF9;P02612	A0A8V0ZKF9_CHICK;MLRM_CHICK	MYL9;	Myosin, light chain 9, regulatory;Myosin regulatory light chain 2, smooth muscle major isoform	Uniprot_Gallus-gallus(chicken)_Rev+Unrev51565sequences_Jan2024	13	;stress fiber,muscle myosin complex,Z disc	;myofibril assembly	;calcium ion binding,structural constituent of muscle,myosin heavy chain binding,myosin II binding,protein heterodimerization activity	1.5824	0.7604	-0.822	0.046954	0.159817	0.0110822	0.0701097	0.153324	0.0295823	17.99	17.41	17.23	17.85	18.04	16.59	17.15	16.68	16.73	17.28	17.87	18.13	18.21	18.22	19.45	17.71	17.6	3971423	259756	173575	153317	236175	268916	98319.1	145929	105181	108749	159393	238845	286448	303233	305166
E1C3A9	E1C3A9_CHICK	HDLBP	Vigilin	Uniprot_Gallus-gallus(chicken)_Rev+Unrev51565sequences_Jan2024	74	cytosol		RNA binding	-0.1455	-0.1131	0.0323	0.47403	0.545767	0.741543	0.29918	0.324184	0.390626	17.82	17.93	17.93	17.78	17.91	18.08	17.88	18	17.97	17.54	17.97	17.92	17.93	17.88	16.8	17.71	17.7	3964271	231616	248944	249472	224312	245985	276756	240706	261440	257464	191182	257581	248348	249400	240566
P35527	SWISS-PROT:P35527		Tax_Id=9606 Gene_Symbol=KRT9 Keratin, type I cytoskeletal 9	contaminants_mq1,6_headersForSpectronaut	34				2.505	2.3315	-0.1735	0.221025	0.231504	0.620872	0.188673	0.19372	0.350036	16.79	15.71	16.87	16.71	16.89	17.17	15.27	15.95	16.76	16.54	17.11	18.04	17.7	20.69	18.07	17.62	17.57	3961146	113190	53731.9	119467	106894	121797	147400	39638.8	63294.5	111310	95064.7	141387	270083	212414	1.69332e+06
A0A8V0YUN8;A0A8V0Z1I7;A0A8V0Z2U4	A0A8V0YUN8_CHICK;A0A8V0Z1I7_CHICK;A0A8V0Z2U4_CHICK	SNRPD1	Small nuclear ribonucleoprotein Sm D1	Uniprot_Gallus-gallus(chicken)_Rev+Unrev51565sequences_Jan2024	5	;;	;;	;;	1.1091	0.6717	-0.4374	0.0249742	0.0731979	0.00423325	0.0475056	0.0926165	0.0180724	17.9	17.69	17.81	17.73	17.43	17.25	17.48	17.24	17.06	17.36	17.99	18.33	18.13	18.15	19.08	17.5	17.39	3956689	244735	212072	229242	217533	177097	156123	182996	154753	136233	167953	261154	328713	287437	290856
A0A8V1A4E6;A0A8V1AGQ7;Q5ZMV7	A0A8V1A4E6_CHICK;A0A8V1AGQ7_CHICK;WDR82_CHICK	WDR82	WD repeat domain 82;WD repeat domain 82;WD repeat-containing protein 82	Uniprot_Gallus-gallus(chicken)_Rev+Unrev51565sequences_Jan2024	18	;;nuclear chromosome, telomeric region,chromatin,nucleolus,Set1C/COMPASS complex,PTW/PP1 phosphatase complex	;;histone H3-K4 trimethylation	;;chromatin binding,histone methyltransferase activity (H3-K4 specific)	0.5571	0.3245	-0.2326	0.167193	0.34448	0.123484	0.157886	0.248341	0.129615	17.74	17.8	17.93	17.77	17.75	17.89	17.45	17.65	17.65	17.07	17.94	17.81	17.79	17.76	18.93	17.73	17.55	3951039	219011	228944	249501	223991	219850	242850	179529	204998	206185	137798	251080	229772	226595	222345
Q66VY4	Q66VY4_CHICK	SF3A2	Splicing factor 3a subunit 2	Uniprot_Gallus-gallus(chicken)_Rev+Unrev51565sequences_Jan2024	21	U2 snRNP,U2-type prespliceosome,catalytic step 2 spliceosome	spliceosomal complex assembly	RNA binding,zinc ion binding	0.5164	0.1276	-0.3888	0.108699	0.598554	0.0065253	0.119599	0.342172	0.0224213	17.99	17.77	17.88	18.07	17.87	17.48	17.86	17.46	17.45	17.33	18.07	18.32	18.29	18.25	16.84	17.68	17.62	3949169	260053	223058	241702	274545	239441	182330	238276	180746	179667	165131	274657	328376	321076	312031
A0A8V0YCC2;A0A8V0YHW0;A0A8V0YHW6;A0A8V0YIR1;A0A8V0YIR6;A0A8V0YQJ8;A0A8V0YQK3;Q5ZIN1	A0A8V0YCC2_CHICK;A0A8V0YHW0_CHICK;A0A8V0YHW6_CHICK;A0A8V0YIR1_CHICK;A0A8V0YIR6_CHICK;A0A8V0YQJ8_CHICK;A0A8V0YQK3_CHICK;NUDC_CHICK	NUDC	Nuclear distribution C, dynein complex regulator;Nuclear distribution C, dynein complex regulator;Nuclear distribution C, dynein complex regulator;Nuclear distribution C, dynein complex regulator;Nuclear distribution C, dynein complex regulator;Nuclear distribution C, dynein complex regulator;Nuclear distribution C, dynein complex regulator;Nuclear migration protein nudC	Uniprot_Gallus-gallus(chicken)_Rev+Unrev51565sequences_Jan2024	23	;;;;;;;cytoplasm,microtubule	;;;;;;;protein folding,cell cycle,developmental process,cell division	;;;;;;;unfolded protein binding	-0.6112	-0.1681	0.4431	0.027237	0.510445	0.00371777	0.0501011	0.31175	0.0170769	17.56	17.76	17.93	17.36	17.84	18.14	18.04	18.12	18.18	18.25	17.42	17.28	17.17	17.28	18.24	17.76	17.69	3903037	193567	221511	250241	168005	234463	289723	269116	285286	295968	311632	175770	158765	147866	158791
A0A8V0ZRM0;A0A8V0ZTK7;A0A8V0ZUM3	A0A8V0ZRM0_CHICK;A0A8V0ZTK7_CHICK;A0A8V0ZUM3_CHICK	CCAR1	Cell division cycle and apoptosis regulator 1	Uniprot_Gallus-gallus(chicken)_Rev+Unrev51565sequences_Jan2024	54	;;	;;	;;	0.8073	0.1616	-0.6458	0.0103252	0.382277	0.0015796	0.0285208	0.264331	0.0110917	17.98	17.83	17.75	18.12	17.99	17.39	17.61	17.35	17.24	16.74	18.1	18.36	18.21	18.27	17.38	17.73	17.68	3897481	259308	232407	220480	284985	260960	172153	200663	167597	154566	109158	281371	337250	302763	315017
A0A8V0XXW6	A0A8V0XXW6_CHICK	PUF60	Poly(U) binding splicing factor 60	Uniprot_Gallus-gallus(chicken)_Rev+Unrev51565sequences_Jan2024	30				0.5273	0.2681	-0.2592	0.115109	0.329872	0.0521298	0.124112	0.241877	0.0749365	17.67	17.72	17.93	17.87	17.75	17.53	17.88	17.49	17.36	17.33	18.26	18.25	18.3	18.23	16.72	17.78	17.68	3880466	208616	215664	250350	239074	219871	189151	240564	184170	168158	165114	314670	312777	323041	306978
A0A8V0XFV7;A0A8V0XMG1;A0A8V0XQ79;F1NM03;Q5ZL42	A0A8V0XFV7_CHICK;A0A8V0XMG1_CHICK;A0A8V0XQ79_CHICK;F1NM03_CHICK;5MP1_CHICK	BZW2	eIF5-mimic protein 1	Uniprot_Gallus-gallus(chicken)_Rev+Unrev51565sequences_Jan2024	37	;;;;cytoplasm,membrane	;;;;nervous system development,cell differentiation	;;;;	-0.8094	-0.1119	0.6976	0.00471253	0.627446	1.9671e-05	0.0190514	0.352354	0.00148413	17.43	17.71	17.74	17.39	17.56	18.26	18.19	18.24	18.43	18.23	17.31	17.14	17.2	17.29	18.13	17.68	17.64	3876831	177191	215069	218971	171694	193160	312844	298474	310161	353904	307608	162383	144398	150369	160182
E1C2C3	E1C2C3_CHICK	SF3B1	Splicing factor 3b subunit 1	Uniprot_Gallus-gallus(chicken)_Rev+Unrev51565sequences_Jan2024	87	U2 snRNP,U12-type spliceosomal complex,nuclear speck,U11/U12 snRNP,U2-type prespliceosome,catalytic step 2 spliceosome	spliceosomal complex assembly	mRNA binding	0.7726	0.1332	-0.6394	0.0721997	0.641139	0.00213526	0.0918841	0.356967	0.0129378	17.99	17.91	17.77	18.15	17.89	17.31	17.67	17.39	17.27	16.74	18.14	18.4	18.3	18.37	16.46	17.68	17.6	3865842	259438	245932	223678	289893	243453	162724	208237	171872	158246	109356	289221	344974	321864	338063
P62846	RS15_CHICK	RPS15	Small ribosomal subunit protein uS19	Uniprot_Gallus-gallus(chicken)_Rev+Unrev51565sequences_Jan2024	9	cytosolic small ribosomal subunit	ribosomal small subunit assembly,translation	RNA binding,structural constituent of ribosome	0.6837	0.4046	-0.2791	0.112438	0.263375	0.0327973	0.122403	0.210206	0.0561262	17.5	17.78	17.65	17.91	17.95	17.5	17.6	17.23	17.51	17.56	17.65	17.92	18.01	17.91	18.96	17.45	17.44	3864502	185922	225016	205216	245478	252574	185442	198546	154139	186437	193657	205626	247870	264664	245514
A0A1D5PC23	A0A1D5PC23_CHICK	TALDO1	Transaldolase	Uniprot_Gallus-gallus(chicken)_Rev+Unrev51565sequences_Jan2024	32	cytoplasm	carbohydrate metabolic process,pentose-phosphate shunt	sedoheptulose-7-phosphate:D-glyceraldehyde-3-phosphate glyceronetransferase activity	0.4782	1.4547	0.9765	0.707699	0.414931	0.00197553	0.37946	0.277038	0.0124468	16.72	17.01	17.2	16.38	17.04	17.87	17.46	17.95	18.22	17.77	16.91	16.43	16.47	16.63	20.27	17.44	17.53	3848896	107884	131714	150329	85192.7	134762	239132	180101	252814	304771	223236	122782	88415.9	90972.4	101266
Q5ZKP8	Q5ZKP8_CHICK	RCJMB04_9m1	Lysine--tRNA ligase	Uniprot_Gallus-gallus(chicken)_Rev+Unrev51565sequences_Jan2024	44				0.0105	-0.1265	-0.137	0.964087	0.55889	0.154268	0.460541	0.328667	0.14977	17.9	17.95	17.84	17.85	17.9	17.83	17.61	17.91	17.88	17.48	17.95	17.95	17.98	17.95	16.53	17.68	17.64	3845112	244108	253573	234422	236746	245291	233068	200628	246011	241899	182534	252932	254027	257928	252399
A0A8V0YVP3	A0A8V0YVP3_CHICK	RBBP6	RB binding protein 6, ubiquitin ligase	Uniprot_Gallus-gallus(chicken)_Rev+Unrev51565sequences_Jan2024	53				0.5716	0.5783	0.0066	0.41728	0.412796	0.928919	0.277992	0.276239	0.449974	17.52	17.56	17.54	17.72	17.58	17.62	17.78	17.44	17.48	17.62	17.6	17.6	17.38	17.5	19.46	17.61	17.59	3843058	188365	193407	190674	216468	196146	201779	225642	178414	182449	201320	198029	198609	170501	184743
A0A8V0X8Z8	A0A8V0X8Z8_CHICK	KCTD12	Uncharacterized protein	Uniprot_Gallus-gallus(chicken)_Rev+Unrev51565sequences_Jan2024	12				1.2128	-0.454	-1.6668	0.0127603	0.051095	1.22777e-05	0.0319486	0.0739739	0.00128716	18.14	18.41	18.52	18.31	18.33	16.62	16.36	16.63	16.82	16.9	18.2	17.84	18.26	17.88	16.95	17.69	17.75	3841841	288194	348196	376309	324542	330488	101051	84202.7	101731	115651	122617	301353	234411	313496	241594
A0A8V0X6I8	A0A8V0X6I8_CHICK	ALDOA	Fructose-bisphosphate aldolase A	Uniprot_Gallus-gallus(chicken)_Rev+Unrev51565sequences_Jan2024	10				0.2255	0.8948	0.6694	0.819921	0.480899	0.0129544	0.416615	0.301347	0.0321666	16.9	17.28	17.77	16.59	17.39	18.08	17.43	18.01	18.09	17.85	17.22	16.48	16.77	16.82	19.89	17.49	17.63	3837630	121984	159685	222811	98983	172054	277193	176480	264705	278621	236361	153034	91226.1	111636	115332
F1NU16	F1NU16_CHICK	SF3A1	Splicing factor 3a subunit 1	Uniprot_Gallus-gallus(chicken)_Rev+Unrev51565sequences_Jan2024	40	U2 snRNP,catalytic step 2 spliceosome,U2-type prespliceosome	regulation of alternative mRNA splicing, via spliceosome	RNA binding	0.5588	0.1721	-0.3867	0.128371	0.541192	0.00744087	0.133011	0.322722	0.0238871	17.81	17.73	17.87	17.99	17.88	17.48	17.81	17.41	17.3	17.29	18.18	18.35	18.18	18.28	16.47	17.6	17.63	3835108	229866	217201	239321	260105	240988	182739	229008	174558	161628	160337	296951	333269	297629	319360
P56517	HDAC1_CHICK	HDAC1	Histone deacetylase 1	Uniprot_Gallus-gallus(chicken)_Rev+Unrev51565sequences_Jan2024	22	histone deacetylase complex,nucleus,cytoplasm,cytosol,Sin3 complex,NuRD complex	negative regulation of transcription from RNA polymerase II promoter,chromatin organization,methylation-dependent chromatin silencing,transcription, DNA-templated,positive regulation of cell proliferation,positive regulation of receptor biosynthetic process,negative regulation by host of viral transcription,positive regulation of transcription from RNA polymerase II promoter,negative regulation o…	core promoter sequence-specific DNA binding,RNA polymerase II repressing transcription factor binding,RNA polymerase II transcription corepressor activity,p53 binding,histone deacetylase activity,transcription factor binding,NAD-dependent histone deacetylase activity (H3-K14 specific),activating transcription factor binding,histone deacetylase binding,protein N-terminus binding,NF-kappaB binding	0.0937	-0.1902	-0.2839	0.557188	0.183287	0.0198041	0.328094	0.167445	0.0414156	17.98	17.91	18	18.03	17.76	17.74	17.74	17.75	17.73	17.26	17.88	17.9	17.9	17.78	17.17	17.77	17.68	3826298	258632	246730	263006	267100	222231	219535	218509	221083	217142	156774	241168	243892	245183	225096
A0A8V0ZVD2;A0A8V1A2T7	A0A8V0ZVD2_CHICK;A0A8V1A2T7_CHICK	KRT18	Keratin 18	Uniprot_Gallus-gallus(chicken)_Rev+Unrev51565sequences_Jan2024	32	;	;	;	0.633	0.8393	0.2063	0.0453306	0.0208724	0.32494	0.0685313	0.0426169	0.239602	17.65	17.21	17.07	17.49	17.55	17.51	17.87	17.27	17.25	18.01	17.87	18.51	18.55	18.48	17.59	17.57	17.57	3822646	205579	151774	137672	183748	191765	186706	238838	158593	156247	264009	239012	372347	382635	366244
A0A8V0ZE79	A0A8V0ZE79_CHICK	RCC2	Regulator of chromosome condensation 2	Uniprot_Gallus-gallus(chicken)_Rev+Unrev51565sequences_Jan2024	8				0.5283	0.883	0.3547	0.547063	0.381197	0.0295767	0.32455	0.263919	0.0526379	17.17	17.5	17.52	17.2	17.33	17.77	17.63	17.73	17.97	17.36	17.53	17.19	17.37	17.22	19.75	17.36	17.55	3807819	147918	185076	187450	151003	164694	224282	202782	217240	256869	167979	189250	149311	169706	152174
A0A8V1A1Y1	A0A8V1A1Y1_CHICK	ARF4	ADP-ribosylation factor 4	Uniprot_Gallus-gallus(chicken)_Rev+Unrev51565sequences_Jan2024	9				-1.4047	-0.6475	0.7572	2.11867e-05	0.00940051	4.24461e-05	0.00151978	0.0270913	0.00208252	17.64	17.69	17.87	17.27	17.61	18.44	18.33	18.25	18.48	18.42	17.28	17.14	17.18	16.99	15.99	17.67	17.64	3790169	204656	211995	239851	158547	199895	356011	329808	312721	365890	350996	159280	144746	148231	130392
Q5ZHP5	CHM4B_CHICK	CHMP4B	Charged multivesicular body protein 4b	Uniprot_Gallus-gallus(chicken)_Rev+Unrev51565sequences_Jan2024	15	ESCRT III complex,nuclear envelope,cytosol,cytoplasmic side of plasma membrane,membrane coat,midbody,late endosome membrane	mitotic cytokinesis,cell separation after cytokinesis,posttranslational protein targeting to membrane,autophagy,vacuolar transport,mitotic metaphase plate congression,exit from mitosis,regulation of centrosome duplication,nuclear envelope reassembly,maintenance of lens transparency,viral budding via host ESCRT complex,protein homooligomerization,membrane fission,ubiquitin-independent protein cata…	protein homodimerization activity,cadherin binding	0.2477	1.6462	1.3984	0.841991	0.398955	0.0580474	0.42345	0.270921	0.0800877	16.55	16.3	16.97	16.43	16.77	17.7	17.46	17.65	17.72	18.98	17.07	16.06	16.16	16.19	20.23	17.33	17.63	3782200	95719.9	80612.5	128578	88404.8	111456	212235	180543	205509	215421	516945	137165	68534.7	73179.2	74948.3
F1NHL2	F1NHL2_CHICK	CAND1	Cullin-associated NEDD8-dissociated protein 1	Uniprot_Gallus-gallus(chicken)_Rev+Unrev51565sequences_Jan2024	69	ubiquitin ligase complex,nucleus	SCF complex assembly,protein ubiquitination,cell differentiation,negative regulation of catalytic activity,positive regulation of transcription, DNA-templated,positive regulation of RNA polymerase II transcriptional preinitiation complex assembly		-0.3798	-0.2041	0.1757	0.0680044	0.259535	0.18043	0.0884106	0.208252	0.165666	17.65	17.87	17.91	17.62	17.81	17.99	17.86	18.07	18.17	17.58	17.86	17.63	17.66	17.71	16.76	17.72	17.63	3780463	206154	239361	245726	201057	229267	261041	238276	275962	295090	196437	237816	202802	207627	214019
Q90688	MYPC3_CHICK	MYBPC3	Myosin-binding protein C, cardiac-type	Uniprot_Gallus-gallus(chicken)_Rev+Unrev51565sequences_Jan2024	5	cell,muscle myosin complex,Z disc,M band,myosin filament,striated muscle thin filament	striated muscle contraction,actin filament organization,cell adhesion,positive regulation of ATPase activity,regulation of muscle filament sliding,sarcomere organization,striated muscle myosin thick filament assembly	ATPase activator activity,structural constituent of muscle,actin filament binding,muscle alpha-actinin binding,structural molecule activity conferring elasticity	-1.2196	-1.7602	-0.5406	0.00186093	7.64564e-05	0.00624907	0.0120749	0.00269865	0.0218802	18.48	18.35	18.04	18.66	18.41	18.01	17.78	17.68	17.68	18.11	16.84	16.92	16.99	16.99	13.25	17.24	17.5	3776895	364659	335268	270247	415118	347872	263389	225342	210624	209788	282370	117140	124071	130602	130095
A0A8V0Z6E1	A0A8V0Z6E1_CHICK	PSMD6	26S proteasome non-ATPase regulatory subunit 6	Uniprot_Gallus-gallus(chicken)_Rev+Unrev51565sequences_Jan2024	32				0.1271	-0.2811	-0.4082	0.546191	0.134025	0.00803347	0.324276	0.136626	0.0248728	18.04	18.07	17.91	18.02	17.94	17.64	17.57	17.7	17.81	17.14	17.73	17.9	17.96	17.87	16.87	17.56	17.65	3769543	268633	275034	246678	266210	251399	204630	194707	212230	229549	144516	217934	244058	254601	240173
Q9W6I1	RBPS2_CHICK	RBPMS2	RNA-binding protein with multiple splicing 2	Uniprot_Gallus-gallus(chicken)_Rev+Unrev51565sequences_Jan2024	13	U1 snRNP,cytoplasm	mRNA splicing, via spliceosome,positive regulation of pathway-restricted SMAD protein phosphorylation,negative regulation of BMP signaling pathway,embryonic digestive tract morphogenesis,digestive tract development,positive regulation of smooth muscle cell proliferation,negative regulation of smooth muscle cell differentiation,positive regulation of SMAD protein import into nucleus	transcription coactivator activity,mRNA binding,poly(A) binding,U1 snRNA binding,snRNA stem-loop binding,protein homodimerization activity	0.1543	-0.0458	-0.2001	0.713334	0.8962	0.362145	0.381358	0.440017	0.256106	17.97	17.74	17.89	17.79	17.86	17.09	18	17.49	17.25	18.14	17.35	17.48	17.56	17.33	18.75	17.72	17.51	3764158	257398	219313	243119	226075	238346	139233	261617	184714	156390	288936	166878	183269	192841	164296
A0A8V0YXD7	A0A8V0YXD7_CHICK	FXR1	FMR1 autosomal homolog 1	Uniprot_Gallus-gallus(chicken)_Rev+Unrev51565sequences_Jan2024	50				-0.2449	-0.3095	-0.0646	0.345319	0.233512	0.283995	0.248674	0.194656	0.220254	17.91	17.83	17.84	17.89	17.93	17.94	17.88	17.69	17.69	17.87	17.69	17.88	17.8	17.81	15.95	17.75	17.66	3763624	246854	232559	235378	243037	249469	250630	241412	211665	210781	239953	210861	241206	228329	230330
A0A8V0YXG4;A0A8V0Z3S9;A0A8V0ZB77	A0A8V0YXG4_CHICK;A0A8V0Z3S9_CHICK;A0A8V0ZB77_CHICK	HSPG2	Heparan sulfate proteoglycan 2	Uniprot_Gallus-gallus(chicken)_Rev+Unrev51565sequences_Jan2024	172	;;	;;	;;	-0.7397	0.4425	1.1821	0.00860022	0.00977972	0.00140818	0.0258534	0.0277052	0.0104195	17.22	16.64	17.39	17.28	17.02	18.37	18.13	18.05	18.21	18.71	17.55	17.7	17.62	17.47	17.52	17.69	17.7	3747968	152240	101798	171894	159327	132866	338254	286983	271420	303758	429093	191752	213432	201354	181295
A0A1L1RPY6	A0A1L1RPY6_CHICK	EIF3E	Eukaryotic translation initiation factor 3 subunit E	Uniprot_Gallus-gallus(chicken)_Rev+Unrev51565sequences_Jan2024	31				0.0363	-0.098	-0.1343	0.903871	0.708269	0.388855	0.442246	0.379652	0.266711	17.9	17.91	17.68	17.88	17.79	17.69	17.94	17.84	17.82	17.02	17.83	17.96	18.07	17.97	16.09	17.61	17.71	3736186	244792	245583	209489	240620	226867	211674	251567	235147	231878	133311	232971	254207	276042	257628
Q90ZH5	Q90ZH5_CHICK	chSAP18	Histone deacetylase complex subunit SAP18	Uniprot_Gallus-gallus(chicken)_Rev+Unrev51565sequences_Jan2024	19				1.1327	0.6717	-0.4609	0.00116017	0.00790083	0.010374	0.00944903	0.0246759	0.0285781	17.62	17.42	17.57	17.84	17.73	17.17	17.58	17.21	16.93	16.91	18.25	18.44	18.47	18.49	17.79	17.37	17.35	3728178	200769	175353	194047	234235	217202	147001	195447	151472	124961	123334	312701	355482	364176	369182
A0A8V0YB27;A0A8V0YHZ7	A0A8V0YB27_CHICK;A0A8V0YHZ7_CHICK	LAMC1	Laminin subunit gamma 1	Uniprot_Gallus-gallus(chicken)_Rev+Unrev51565sequences_Jan2024	85	;	;	;	0.9433	0.8878	-0.0555	3.9301e-06	4.3882e-06	0.611679	0.000741452	0.000775772	0.346849	17.56	17.17	17.37	17.49	17.45	17.39	17.33	17.29	17.1	17.61	18.13	18.34	18.34	18.28	18.4	17.63	17.6	3726437	192881	147024	169353	183780	179053	172277	165069	160428	140963	200447	286076	332501	331720	318543
F1NCE1	F1NCE1_CHICK	EIF3D	Eukaryotic translation initiation factor 3 subunit D	Uniprot_Gallus-gallus(chicken)_Rev+Unrev51565sequences_Jan2024	33	eukaryotic translation initiation factor 3 complex,eukaryotic 43S preinitiation complex,eukaryotic 48S preinitiation complex,eukaryotic translation initiation factor 3 complex, eIF3m	formation of cytoplasmic translation initiation complex,cap-dependent translational initiation,positive regulation of translation,IRES-dependent viral translational initiation,viral translational termination-reinitiation,positive regulation of mRNA binding,translational initiation	translation initiation factor activity,mRNA cap binding	0.3183	0.0003	-0.318	0.104362	0.998615	0.0219247	0.116588	0.470649	0.0439077	17.91	17.95	17.64	17.92	17.85	17.68	17.57	17.67	17.61	17.08	17.59	17.73	17.79	17.79	18.29	17.56	17.6	3719655	246275	252671	203694	248377	236653	210483	194184	209176	200244	138621	196829	217481	226966	227019
Q5F428	EIF3L_CHICK	EIF3L	Eukaryotic translation initiation factor 3 subunit L	Uniprot_Gallus-gallus(chicken)_Rev+Unrev51565sequences_Jan2024	32	fibrillar center,nucleoplasm,eukaryotic translation initiation factor 3 complex	translational initiation,viral translational termination-reinitiation	translation initiation factor activity	0.0715	-0.1436	-0.2151	0.796389	0.550133	0.15408	0.409296	0.325637	0.149663	17.94	17.93	17.73	17.96	17.77	17.78	17.72	17.82	17.79	17.02	17.75	18.02	17.95	18	16.35	17.66	17.57	3715627	251935	249606	217445	254472	224176	225835	215602	230791	226269	133258	219931	265285	253564	261706
A0A1D5PNL3;A0A8V0YMZ8	A0A1D5PNL3_CHICK;A0A8V0YMZ8_CHICK	UBE2N	Ubiquitin conjugating enzyme E2 N;E2 ubiquitin-conjugating enzyme	Uniprot_Gallus-gallus(chicken)_Rev+Unrev51565sequences_Jan2024	12	;	;	ATP binding;	-1.6655	-0.5317	1.1337	0.000839497	0.101604	0.00278442	0.00808785	0.114493	0.0147153	17.15	17.52	17.82	16.78	17.4	18.33	18.18	18.34	18.62	18.94	16.94	16.24	16.43	16.68	17.54	17.6	17.6	3698296	145307	187317	231004	112381	173542	328590	297173	331192	403074	504108	125395	77558	88569	104941
A0A8V1AK68	A0A8V1AK68_CHICK	EIF4H	Eukaryotic translation initiation factor 4H	Uniprot_Gallus-gallus(chicken)_Rev+Unrev51565sequences_Jan2024	20				0.5881	1.6485	1.0604	0.674807	0.408055	0.015209	0.368217	0.274537	0.0353504	16.54	16.46	17.24	16.48	16.69	17.55	17.63	17.5	17.57	18.4	16.57	15.94	16.27	16.82	20.34	17.47	17.39	3696015	95316.6	90157.9	154386	91521.7	105909	191645	203016	184937	195228	345690	97418.3	62992.1	78766.8	115803
A0A8V0ZY66;A0A8V1A3E4;A0A8V1AAU6;Q5ZIL2	A0A8V0ZY66_CHICK;A0A8V1A3E4_CHICK;A0A8V1AAU6_CHICK;VPS29_CHICK	VPS29	Vacuolar protein sorting-associated protein 29	Uniprot_Gallus-gallus(chicken)_Rev+Unrev51565sequences_Jan2024	9	;;;endosome,cytosol,endosome membrane,retromer complex	;;;intracellular protein transport,retrograde transport, endosome to Golgi	;;;zinc ion binding,protein transporter activity	0.606	0.4042	-0.2018	0.0861206	0.184557	0.0445502	0.102863	0.168124	0.0678287	17.49	17.74	17.85	17.57	17.71	17.59	17.42	17.51	17.54	17.29	17.86	17.79	17.66	18.05	18.75	17.46	17.38	3689272	183509	218484	235445	194457	213824	197646	175222	186030	190327	159987	238116	226987	207814	271337
E1C5A3	E1C5A3_CHICK	PPP2R5A	Protein phosphatase 2 regulatory subunit B'alpha	Uniprot_Gallus-gallus(chicken)_Rev+Unrev51565sequences_Jan2024	25	protein phosphatase type 2A complex,centrosome,cytosol,membrane,Z disc,M band	protein dephosphorylation,signal transduction,positive regulation of protein dephosphorylation,regulation of phosphoprotein phosphatase activity,negative regulation of lipid kinase activity,negative regulation of protein localization to plasma membrane	phosphoprotein phosphatase activity,protein phosphatase regulator activity,kinase binding	-0.071	-0.6408	-0.5698	0.841846	0.0757891	0.00217815	0.423424	0.0946267	0.0130653	17.98	18.12	18.38	17.98	18.08	17.54	17.65	17.53	17.59	17.41	17.77	17.9	17.75	17.69	13.52	17.64	17.56	3685147	259029	285222	340229	259109	276288	191224	205175	188842	196710	174662	223150	244653	220236	210893
A0A8V0ZCR8;Q5ZLT0	A0A8V0ZCR8_CHICK;XPO7_CHICK	XPO7	Exportin 7;Exportin-7	Uniprot_Gallus-gallus(chicken)_Rev+Unrev51565sequences_Jan2024	45	;nuclear pore,cytoplasm	;protein export from nucleus	;nuclear export signal receptor activity,Ran GTPase binding	-0.3243	-0.1914	0.1329	0.246162	0.478251	0.418035	0.201324	0.30061	0.278279	17.56	17.96	17.99	17.51	17.73	18.02	17.68	18.06	18.13	17.49	17.88	17.81	17.8	17.69	15.97	17.46	17.55	3681405	193904	255640	260455	186761	216844	265406	210349	273328	287663	184328	241339	229764	228537	211541
A0A8V0X2U7	A0A8V0X2U7_CHICK		FACT complex subunit	Uniprot_Gallus-gallus(chicken)_Rev+Unrev51565sequences_Jan2024	32				0.6927	0.3713	-0.3214	0.11785	0.307246	0.0789751	0.125897	0.231882	0.0972665	17.7	17.55	17.48	17.99	17.67	17.64	17.47	17.49	17.33	16.75	18.22	18.38	18.31	18.32	16	17.6	17.63	3669926	213500	191748	182953	260113	208060	204368	181213	184463	165312	110046	306270	341920	324819	327810
Q5ZLP5	Q5ZLP5_CHICK	SARNP	SAP domain containing ribonucleoprotein	Uniprot_Gallus-gallus(chicken)_Rev+Unrev51565sequences_Jan2024	17				1.2732	1.499	0.2259	0.196005	0.162635	0.321068	0.174709	0.155097	0.237957	16.82	16.42	17.53	17.07	17.05	17.14	17.44	17.03	16.96	17.59	17.69	17.43	17.67	18.44	19.83	17.31	17.41	3667554	116044	87844.3	188876	137839	136130	144064	177400	133499	127674	197098	211049	176427	209229	354908
A0A3Q2U321	A0A3Q2U321_CHICK	POSTN	Periostin	Uniprot_Gallus-gallus(chicken)_Rev+Unrev51565sequences_Jan2024	62				-0.8321	1.6928	2.5248	0.00987314	0.0124446	0.000793751	0.0278742	0.0314994	0.00790853	15.84	16.05	16.08	16.25	15.65	18.18	18.39	18.31	18.68	18.9	18.04	17.94	17.75	17.83	16.25	17.63	17.71	3666740	58859.5	68002.5	69226.6	77819.4	51455.2	296674	342602	325975	418752	488469	268700	251836	219683	233428
A0A8V0Z968;A0A8V0Z9Y2	A0A8V0Z968_CHICK;A0A8V0Z9Y2_CHICK	SNRPB2	Small nuclear ribonucleoprotein polypeptide B2	Uniprot_Gallus-gallus(chicken)_Rev+Unrev51565sequences_Jan2024	13	;	;	;	0.7112	0.4254	-0.2857	0.00237757	0.0172712	0.0629151	0.0136319	0.0381473	0.0843534	17.61	17.52	17.58	17.92	17.68	17.2	17.75	17.32	17.14	17.41	18	18	17.93	18.02	18.44	17.51	17.46	3660783	200185	187414	195356	247809	210470	150840	221001	163761	144628	173911	262792	262803	250376	265638
A0A8V0ZZS4	A0A8V0ZZS4_CHICK	CTTN	Cortactin	Uniprot_Gallus-gallus(chicken)_Rev+Unrev51565sequences_Jan2024	33				0.8283	1.2253	0.397	0.485966	0.369505	0.17402	0.303048	0.259239	0.161941	17.08	16.97	17.4	16.88	17.1	17.23	17.57	17.16	17.14	18.11	17.45	16.98	16.85	17.13	20.03	17.61	17.57	3655638	138534	128372	172730	120911	140064	153650	194882	146323	143941	283723	179489	128844	117977	143411
Q5ZM58	Q5ZM58_CHICK	ACTR1A	Alpha-centractin	Uniprot_Gallus-gallus(chicken)_Rev+Unrev51565sequences_Jan2024	31				0.2044	-0.0704	-0.2749	0.132736	0.379524	0.0501772	0.135936	0.263215	0.0731423	17.97	17.84	17.67	17.84	17.89	17.67	17.59	17.8	17.62	17.09	17.75	17.78	17.91	17.85	17.56	17.57	17.5	3651775	257506	234449	208042	234068	243428	208594	196944	227472	200816	139400	220091	225375	246560	235938
Q7ZT63	Q7ZT63_CHICK	cpsmb7	Proteasome subunit beta	Uniprot_Gallus-gallus(chicken)_Rev+Unrev51565sequences_Jan2024	12	nucleoplasm,cytosol,proteasome core complex	proteolysis involved in cellular protein catabolic process,positive regulation of protein targeting to mitochondrion	threonine-type endopeptidase activity	0.4938	0.5779	0.084	0.55913	0.508397	0.267511	0.328754	0.310949	0.212351	17.4	17.54	17.56	17.46	17.51	17.64	17.45	17.71	17.67	17.4	17.2	17.23	17.14	17.22	19.57	17.44	17.44	3634837	172364	190654	193775	180160	186031	203744	179541	213697	208415	172933	150608	153667	144020	152553
A0A8V0ZBX0;E1C1V3	A0A8V0ZBX0_CHICK;E1C1V3_CHICK	JUP	Junction plakoglobin	Uniprot_Gallus-gallus(chicken)_Rev+Unrev51565sequences_Jan2024	40	;nucleus,cytoplasm,catenin complex,cell-cell adherens junction	;positive regulation of transcription from RNA polymerase II promoter	;transcription coactivator activity,nuclear hormone receptor binding,protein phosphatase binding,cadherin binding,alpha-catenin binding	-2.2765	-0.0025	2.274	0.0251129	0.994068	0.0259336	0.0476607	0.469266	0.0486469	16.89	16.34	16.05	16.79	16.37	17.92	18.7	18.23	18.76	19.69	16.14	16.75	16.77	17.1	15.08	17.61	17.62	3612425	121289	82775.9	67966.5	113016	84844.4	248445	424589	306730	445405	847568	72343.3	110262	111462	140484
A0A1L1RP66;Q5ZKX2	A0A1L1RP66_CHICK;Q5ZKX2_CHICK	PSMC6;RCJMB04_8n6	Proteasome 26S subunit, ATPase 6;AAA+ ATPase domain-containing protein	Uniprot_Gallus-gallus(chicken)_Rev+Unrev51565sequences_Jan2024	30	;proteasome regulatory particle, base subcomplex,cytosolic proteasome complex,nuclear proteasome complex	;ER-associated ubiquitin-dependent protein catabolic process,positive regulation of RNA polymerase II transcriptional preinitiation complex assembly	;proteasome-activating ATPase activity,TBP-class protein binding	-0.0366	-0.34	-0.3034	0.840599	0.0883279	1.60149e-05	0.42304	0.104551	0.00137497	17.86	17.95	17.85	17.95	17.92	17.49	17.63	17.65	17.62	17.62	17.66	17.68	17.86	17.69	16.67	17.75	17.59	3610076	238627	252986	236217	252465	247463	184670	202166	205691	200788	201597	206557	209933	237638	211257
A0A8V0ZH38;Q5ZMW3	A0A8V0ZH38_CHICK;API5_CHICK	API5	Apoptosis inhibitor 5	Uniprot_Gallus-gallus(chicken)_Rev+Unrev51565sequences_Jan2024	30	;spliceosomal complex,cytoplasm,nuclear speck,nucleus	;apoptotic process,negative regulation of apoptotic process,negative regulation of fibroblast apoptotic process	;fibroblast growth factor binding,RNA binding	-0.1741	-0.0446	0.1295	0.369036	0.815494	0.0705997	0.25909	0.415301	0.090641	17.61	17.69	17.82	17.63	17.68	17.82	17.92	17.81	17.9	17.64	17.91	17.77	17.75	17.8	16.68	17.44	17.52	3605461	200257	212006	231733	202645	210704	231350	247227	229539	244185	204337	246744	223888	221009	228403
A0A8V0Y9L5	A0A8V0Y9L5_CHICK	PKP2	Plakophilin 2	Uniprot_Gallus-gallus(chicken)_Rev+Unrev51565sequences_Jan2024	55				-2.5301	-1.6411	0.889	0.00057514	2.421e-06	0.00637829	0.00675551	0.00058912	0.0221477	17.67	17.49	17.45	17.74	17.7	18.27	18.67	18.09	18.54	18.84	15.98	16.14	16.2	16.24	14.98	17.65	17.67	3599437	208983	183724	179429	218775	213170	315529	415718	278184	380095	469923	64645.2	72270.9	75473.2	77154.4
A0A8V0ZAW7	A0A8V0ZAW7_CHICK	EIF4G3	Eukaryotic translation initiation factor 4 gamma 3	Uniprot_Gallus-gallus(chicken)_Rev+Unrev51565sequences_Jan2024	74				0.0691	-0.2055	-0.2746	0.600775	0.128077	0.00179741	0.343022	0.132798	0.0118678	17.84	17.98	17.72	17.86	17.88	17.59	17.49	17.68	17.67	17.46	17.84	17.78	17.75	17.65	17.13	17.59	17.63	3599168	234446	257664	216313	237852	241170	197724	184341	209730	208937	180876	233867	225640	221103	205259
A0A8V0X7S3	A0A8V0X7S3_CHICK		Eukaryotic translation initiation factor 3 subunit C N-terminal domain-containing protein	Uniprot_Gallus-gallus(chicken)_Rev+Unrev51565sequences_Jan2024	18				-0.089	-0.3739	-0.2849	0.699671	0.0983351	0.056792	0.376777	0.112153	0.0790376	18.02	17.87	17.62	18.03	17.97	17.7	17.75	17.7	17.76	17.11	17.64	17.76	17.82	17.63	16.45	17.63	17.56	3587504	265401	239768	201173	267370	257318	213036	221050	212853	222402	141060	204318	222498	230828	203033
A0A8V0ZPU8	A0A8V0ZPU8_CHICK	YBX3	Y-box binding protein 3	Uniprot_Gallus-gallus(chicken)_Rev+Unrev51565sequences_Jan2024	15				0.8444	0.6259	-0.2185	0.371896	0.468692	0.129352	0.260206	0.297325	0.133689	17.53	17.52	17.35	17.7	17.55	17.09	17.53	17.14	17.1	17.62	17.23	17.32	17.2	17.52	19.62	17.36	17.52	3584228	189095	187876	167534	212526	191497	139247	189735	144742	140159	201354	153446	164091	150675	188524
Q05744	CATD_CHICK	CTSD	Cathepsin D	Uniprot_Gallus-gallus(chicken)_Rev+Unrev51565sequences_Jan2024	19	lysosome	proteolysis,autophagy,cell death,programmed cell death,protein catabolic process	aspartic-type endopeptidase activity	0.658	1.1747	0.5167	0.608816	0.445947	0.0130767	0.345856	0.288765	0.0323488	17.09	16.93	17.11	16.88	17.32	17.66	17.41	17.91	17.26	17.63	16.67	16.65	16.71	16.74	20.11	17.41	17.44	3581951	139673	124645	141017	120665	163080	206506	174018	245522	157389	202420	104027	103175	107531	109204
A0A8V0Z655	A0A8V0Z655_CHICK	SNRNP200	Activating signal cointegrator 1 complex subunit 3	Uniprot_Gallus-gallus(chicken)_Rev+Unrev51565sequences_Jan2024	151				0.7106	0.1832	-0.5275	0.105869	0.563949	0.00457067	0.117739	0.330435	0.0187613	17.82	17.67	17.62	18.01	17.79	17.4	17.51	17.33	17.24	16.7	18.08	18.29	18.22	18.27	16.04	17.53	17.48	3576962	231856	209257	201877	263206	226349	172743	187144	164889	154589	106373	277074	320728	304931	315648
F1NHW3;Q5ZI09	F1NHW3_CHICK;Q5ZI09_CHICK	ERH;RCJMB04_31j3	Enhancer of rudimentary homolog	Uniprot_Gallus-gallus(chicken)_Rev+Unrev51565sequences_Jan2024	7	midbody,methylosome;	pyrimidine nucleotide biosynthetic process,cell cycle,positive regulation of Notch signaling pathway;	methyl-CpG binding;	1.2324	1.0555	-0.177	0.108853	0.136917	0.466516	0.11973	0.138484	0.296549	17.39	16.99	17.53	17.33	17.09	16.77	17.68	16.84	16.57	17.36	17.55	17.38	18.18	18.25	19.38	17.76	17.49	3564735	172201	130277	189509	164822	139957	111839	210226	116997	97415.2	168319	191974	170939	297780	311087
A0A3Q2UHM4	A0A3Q2UHM4_CHICK	DNM1L	Dynamin-1-like protein	Uniprot_Gallus-gallus(chicken)_Rev+Unrev51565sequences_Jan2024	58				-1.0217	-0.8197	0.2019	0.00205116	0.00914843	0.129154	0.0127285	0.0267277	0.133561	17.76	17.87	18.14	17.52	17.79	17.96	17.81	18.13	18.2	18.04	17.37	17.16	17.29	17.15	15.29	17.59	17.56	3558444	222351	240230	289016	188596	226282	254643	229696	286062	302106	269233	168821	146256	159970	145759
A0A8V0YXH0;A0A8V0YXW1;A0A8V0YXX4	A0A8V0YXH0_CHICK;A0A8V0YXW1_CHICK;A0A8V0YXX4_CHICK	CTNNA2	Catenin alpha-2	Uniprot_Gallus-gallus(chicken)_Rev+Unrev51565sequences_Jan2024	27	;;	;;	;;	0.2239	0.1417	-0.0822	0.239725	0.435706	0.369849	0.197864	0.285163	0.259372	17.86	17.6	17.54	17.74	17.5	17.49	17.71	17.65	17.55	17.43	17.8	17.95	18.01	17.96	17.07	17.73	17.59	3557704	237636	198490	190490	219576	185254	184504	214720	205706	192280	177097	228716	253658	264039	254226
A0A8V0ZQC1;A0A8V0ZVJ8	A0A8V0ZQC1_CHICK;A0A8V0ZVJ8_CHICK	KRT8	Keratin, type II cytoskeletal 8;Keratin, type II cytoskeletal 8	Uniprot_Gallus-gallus(chicken)_Rev+Unrev51565sequences_Jan2024	31	;	;	;	-0.8616	-0.4211	0.4405	0.0270009	0.194449	0.155656	0.0498341	0.173829	0.150636	18.09	17.06	17.74	17.15	17.79	17.97	18.48	17.39	17.78	18.41	17.01	17.47	17.45	17.57	15.96	17.72	17.67	3552251	279260	136642	219585	145842	226452	256509	366328	171910	225286	347587	132416	182133	179650	194528
Q5ZJ61	Q5ZJ61_CHICK	FARSB	Phenylalanine--tRNA ligase beta subunit	Uniprot_Gallus-gallus(chicken)_Rev+Unrev51565sequences_Jan2024	38	phenylalanine-tRNA ligase complex	phenylalanyl-tRNA aminoacylation,protein heterotetramerization	magnesium ion binding,RNA binding,ATP binding,phenylalanine-tRNA ligase activity	-0.6138	-0.5139	0.0998	0.0798554	0.132762	0.337336	0.0979263	0.135936	0.245246	17.8	17.83	17.88	17.72	17.73	17.97	17.76	17.98	18.1	17.61	17.59	17.55	17.59	17.57	13.83	17.57	17.62	3548056	228879	233357	241561	216102	217309	257407	221220	258973	281042	200043	197101	192565	197672	194446
A0A8V0XB11;Q5ZIE2	A0A8V0XB11_CHICK;Q5ZIE2_CHICK	EIF1AX;RCJMB04_27j6	Eukaryotic translation initiation factor 4C	Uniprot_Gallus-gallus(chicken)_Rev+Unrev51565sequences_Jan2024	12	;	;	;	0.257	0.9944	0.7374	0.796205	0.444739	0.00809544	0.409266	0.288306	0.0249704	16.92	16.97	17.33	16.83	17.19	17.77	17.58	17.6	17.71	18.23	16.82	16.64	16.63	16.99	19.8	17.45	17.29	3523064	123823	128366	164920	116750	149543	223846	195389	198164	214446	307530	116067	101926	101347	130247
A0A8V0Z4A4	A0A8V0Z4A4_CHICK	RTN4	Reticulon	Uniprot_Gallus-gallus(chicken)_Rev+Unrev51565sequences_Jan2024	70				0.3273	0.536	0.2087	0.72885	0.599612	0.338895	0.386351	0.342603	0.245864	17.65	17.17	16.81	17.59	17.65	17.62	17.85	17.65	16.98	17.84	16.48	16.78	16.98	16.99	19.61	17.59	17.5	3522499	205989	147284	115179	197208	205039	200780	236051	205920	129250	234252	91511	112704	129173	130060
A0A8V0YLE8;A0A8V0YLG2;A0A8V0YLH1;A0A8V0YSS0;A0A8V0YSW7;A0A8V0YT57;A0A8V0YUS8;A0A8V0YZJ2	A0A8V0YLE8_CHICK;A0A8V0YLG2_CHICK;A0A8V0YLH1_CHICK;A0A8V0YSS0_CHICK;A0A8V0YSW7_CHICK;A0A8V0YT57_CHICK;A0A8V0YUS8_CHICK;A0A8V0YZJ2_CHICK	COL4A5	Collagen type IV alpha 5 chain	Uniprot_Gallus-gallus(chicken)_Rev+Unrev51565sequences_Jan2024	5	;;;;;;;	;;;;;;;	;;;;;;;	-3.2057	-1.4859	1.7198	8.113e-05	0.000718645	7.67751e-05	0.00277597	0.00747756	0.00269865	17.16	16.43	17.11	17.17	17.21	19.01	18.48	18.69	18.74	18.85	15.45	15.8	15.84	14.83	15.66	17.58	17.44	3514839	146451	88381.8	141016	147788	151744	528386	365522	422686	436659	471378	44747.4	57183.1	58478.7	29042.1
Q5ZHW5	Q5ZHW5_CHICK	RCJMB04_32j6	Proteasome subunit alpha type	Uniprot_Gallus-gallus(chicken)_Rev+Unrev51565sequences_Jan2024	8				0.7766	0.6793	-0.0973	0.403283	0.446651	0.328256	0.272604	0.289026	0.241085	17.46	17.48	17.55	17.4	17.26	17.34	17.2	17.53	17.47	17.09	17.35	17.13	17.21	17.35	19.59	17.56	17.51	3510886	180518	182549	192389	173299	156781	166349	150955	189625	181155	139683	167322	143683	151455	167325
A0A8V0YG03	A0A8V0YG03_CHICK	DECR1	2,4-dienoyl-CoA reductase 1	Uniprot_Gallus-gallus(chicken)_Rev+Unrev51565sequences_Jan2024	13				-0.0406	-0.1376	-0.097	0.919412	0.601684	0.821919	0.447062	0.343189	0.417195	18.33	17.36	17.75	17.88	17.09	17.22	17.51	18.63	16.89	17.28	17.18	17.71	17.7	17.53	17.83	17.56	17.56	3510203	330445	167823	220285	240575	139522	153102	186425	406726	121597	159377	148130	215024	212838	189854
A0A8V0ZTE2	A0A8V0ZTE2_CHICK	SSB	Sjogren syndrome antigen B	Uniprot_Gallus-gallus(chicken)_Rev+Unrev51565sequences_Jan2024	33				0.2047	0.5226	0.3178	0.760922	0.495356	0.00161185	0.397305	0.30633	0.0111702	17.35	17.4	17.39	17.36	17.43	17.67	17.63	17.65	17.86	17.71	17.35	17.07	17.09	17.1	19.3	17.46	17.42	3509836	166936	172893	172002	167891	176845	209006	202690	205140	237165	213674	167429	137748	139862	140753
A0A8V0YZ27;Q5ZIZ0	A0A8V0YZ27_CHICK;Q5ZIZ0_CHICK	PGD;RCJMB04_22k15	6-phosphogluconate dehydrogenase, decarboxylating;6-phosphogluconate dehydrogenase, decarboxylating	Uniprot_Gallus-gallus(chicken)_Rev+Unrev51565sequences_Jan2024	30	;	;	;	0.4526	1.0814	0.6288	0.717987	0.489078	0.0142076	0.382836	0.304126	0.0339489	16.96	17.24	17.33	16.49	17.09	17.74	17.17	17.8	17.99	17.56	16.82	16.26	16.24	16.34	20.05	17.45	17.33	3508761	127605	155040	165045	91992	139155	219028	147229	228637	260912	193869	115594	78525.1	77200.5	82829
A0A8V0ZEG5	A0A8V0ZEG5_CHICK	LOC107049543	Purine rich element binding protein B	Uniprot_Gallus-gallus(chicken)_Rev+Unrev51565sequences_Jan2024	18				0.2318	0.2682	0.0364	0.105339	0.124879	0.794556	0.117353	0.130595	0.408713	17.25	17.59	17.94	17.36	17.64	17.8	17.62	17.54	17.47	17.62	18.07	17.95	17.93	17.75	17.45	17.32	17.47	3504601	156102	197677	251254	168559	204625	228192	201075	190523	181680	201714	274550	252454	250568	221165
A0A8V0Y884	A0A8V0Y884_CHICK	DSP	Desmoplakin	Uniprot_Gallus-gallus(chicken)_Rev+Unrev51565sequences_Jan2024	241				-1.5337	-0.5497	0.984	0.00463933	0.0857458	0.0157613	0.018888	0.102565	0.0360951	17.54	17.18	16.74	17.72	17.48	17.95	18.44	17.87	18.38	18.89	16.55	17	17.23	17.21	15.5	17.57	17.56	3492108	190570	148676	109522	216117	182978	253669	356450	239923	342053	484941	96096.9	131222	154052	151448
Q5ZLV5	Q5ZLV5_CHICK	RCJMB04_4l9	Cytosolic non-specific dipeptidase	Uniprot_Gallus-gallus(chicken)_Rev+Unrev51565sequences_Jan2024	37				0.2051	0.719	0.5139	0.793846	0.454412	0.00701131	0.408464	0.291918	0.0232828	17.08	17.37	17.52	16.77	17.33	17.8	17.46	17.81	17.97	17.67	17.26	16.84	16.93	17.08	19.49	17.39	17.33	3487956	138808	169547	188072	111706	165210	228862	180084	230070	256347	208890	156646	117215	125105	138929
A0A8V1A0R5	A0A8V1A0R5_CHICK	LSP1P1	Lymphocyte-specific protein 1 pseudo 1	Uniprot_Gallus-gallus(chicken)_Rev+Unrev51565sequences_Jan2024	37				3.0354	2.6018	-0.4336	0.0439748	0.0512163	0.247281	0.0672856	0.0740834	0.201955	16.24	16.28	16.48	16.12	16.37	15.57	15.72	15.22	15.24	16.88	18.49	18.33	18.23	18.48	20.05	17.28	17.36	3486827	77549.4	79809	91158.6	71284.9	84688.3	48610.3	53963.3	38093.2	38597.1	120219	368964	328823	306458	365849
A0A8V0Y2L2	A0A8V0Y2L2_CHICK	PSMA2	Proteasome subunit alpha 2	Uniprot_Gallus-gallus(chicken)_Rev+Unrev51565sequences_Jan2024	8				0.6148	0.6171	0.0023	0.465665	0.464368	0.984385	0.296148	0.295789	0.466552	17.15	17.43	17.58	17.36	17.61	17.57	17.29	17.56	17.56	17.16	17.25	17.16	17.31	17.26	19.5	17.24	17.53	3479538	145512	176810	195899	168788	199841	195057	160195	193573	192659	146789	155401	146532	162241	156438
A0A1L1RKT0;A0A8V0ZWF8	A0A1L1RKT0_CHICK;A0A8V0ZWF8_CHICK	NMT1	Glycylpeptide N-tetradecanoyltransferase	Uniprot_Gallus-gallus(chicken)_Rev+Unrev51565sequences_Jan2024	34	;	N-terminal protein myristoylation;	glycylpeptide N-tetradecanoyltransferase activity;	-0.1101	-0.0097	0.1005	0.785203	0.980823	0.43123	0.405521	0.465598	0.283368	17.62	17.67	17.63	17.6	17.65	17.97	17.63	17.82	17.87	17.3	17.25	17.13	17.16	17.21	18.66	17.44	17.45	3479374	201840	208848	202914	198999	205968	256762	202863	231781	239482	161150	156332	143111	146231	151514
A0A8V0ZIA1	A0A8V0ZIA1_CHICK	OBSL1	Obscurin like cytoskeletal adaptor 1	Uniprot_Gallus-gallus(chicken)_Rev+Unrev51565sequences_Jan2024	117				0.4376	0.144	-0.2936	0.14178	0.510667	0.170878	0.141536	0.311841	0.160116	17.81	17.66	17.42	17.82	17.7	17.17	17.43	16.91	17.29	17.96	17.75	18.11	18	18.09	16.92	17.5	17.48	3454858	230298	206961	175235	231852	212407	147053	176632	122822	160199	255476	220052	282677	262996	278175
A0A8V0XFX7	A0A8V0XFX7_CHICK	CDC37	Hsp90 co-chaperone Cdc37	Uniprot_Gallus-gallus(chicken)_Rev+Unrev51565sequences_Jan2024	25				-0.4827	-0.2195	0.2632	0.000416774	0.0472344	0.00625792	0.00574455	0.070355	0.0219008	17.55	17.67	17.79	17.45	17.6	17.83	17.72	17.91	17.96	17.95	17.56	17.15	17.34	17.34	17.55	17.58	17.48	3449816	191349	208032	226866	178982	198780	233463	215929	247027	255256	253261	193687	145697	165703	165799
Q5ZJI7	Q5ZJI7_CHICK	ARPC1A	Actin-related protein 2/3 complex subunit	Uniprot_Gallus-gallus(chicken)_Rev+Unrev51565sequences_Jan2024	27	cytoplasm,Arp2/3 protein complex,muscle cell projection membrane	Arp2/3 complex-mediated actin nucleation	actin filament binding	-0.2153	-0.0419	0.1734	0.148954	0.669787	0.223838	0.146245	0.366532	0.189861	17.58	17.65	17.77	17.37	17.54	17.97	17.55	17.97	17.8	17.45	17.53	17.43	17.45	17.51	17.79	17.51	17.43	3419970	195435	206241	223782	169683	191153	257460	191350	257098	227913	178435	189769	176310	178994	186139
A0A8V0ZNG3	A0A8V0ZNG3_CHICK	ABLIM1	Actin binding LIM protein 1	Uniprot_Gallus-gallus(chicken)_Rev+Unrev51565sequences_Jan2024	55				-1.0755	-0.6343	0.4412	0.042944	0.00215908	0.224428	0.0663155	0.013024	0.190228	17.74	17.45	17.41	17.75	17.72	17.73	18.06	17.48	17.8	18.83	16.92	17.21	17.17	17.11	16.38	17.59	17.55	3412699	218714	178683	173824	219835	216509	217174	274109	183356	228969	464399	123605	151784	147526	141046
E1BW33	E1BW33_CHICK	SMG1	non-specific serine/threonine protein kinase	Uniprot_Gallus-gallus(chicken)_Rev+Unrev51565sequences_Jan2024	62	nucleus,nucleoplasm,cytoplasm	nuclear-transcribed mRNA catabolic process, nonsense-mediated decay,DNA repair,peptidyl-serine phosphorylation,regulation of telomere maintenance,protein autophosphorylation,phosphatidylinositol phosphorylation,regulation of response to DNA damage stimulus	protein serine/threonine kinase activity,ATP binding,kinase activity,telomeric DNA binding	0.3711	-0.016	-0.3871	0.0418409	0.889495	0.0161866	0.065274	0.437828	0.036691	17.71	17.79	17.61	17.79	17.91	17.59	17.38	17.43	17.54	16.84	17.63	17.62	17.74	17.61	18.09	17.31	17.42	3408877	213780	227141	200316	227254	246904	197608	170343	176868	190357	117698	203307	201607	218671	199871
A0A1D5PC99;A0A8V0ZVU3;A0A8V0ZVV0;A0A8V1A376;F1N9U8	A0A1D5PC99_CHICK;A0A8V0ZVU3_CHICK;A0A8V0ZVV0_CHICK;A0A8V1A376_CHICK;F1N9U8_CHICK	ETFA	Electron transfer flavoprotein subunit alpha	Uniprot_Gallus-gallus(chicken)_Rev+Unrev51565sequences_Jan2024	17	;;;;mitochondrion	;;;;electron transport chain,fatty acid beta-oxidation using acyl-CoA dehydrogenase	;;;;electron carrier activity,oxidoreductase activity,flavin adenine dinucleotide binding	-0.9373	-0.3927	0.5446	0.0707902	0.0567355	0.189372	0.090821	0.0789943	0.170891	17.77	17.44	17.76	17.4	17.05	17.53	17.4	18.71	17.59	18.5	16.95	17.35	17.29	17.03	16.9	17.55	17.68	3401599	223691	177243	222316	173012	135321	188965	172566	429683	197392	370243	126371	166707	160675	133789
P02533	SWISS-PROT:P02533		Tax_Id=9606 Gene_Symbol=KRT14 Keratin, type I cytoskeletal 14	contaminants_mq1,6_headersForSpectronaut	21				1.6728	1.1639	-0.5088	0.0432073	0.0797188	0.196751	0.0665455	0.0978417	0.175183	17.81	16.07	17.47	17.3	17.04	17.43	16.26	16.23	16.59	16.79	17.61	18	17.83	19.31	18.57	17.44	17.3	3395060	229694	68577.6	181251	160815	134679	177155	78503.2	76754	98963.7	113302	199423	262871	232706	651936
Q5F4B6	Q5F4B6_CHICK	POLDIP3	DNA polymerase delta interacting protein 3	Uniprot_Gallus-gallus(chicken)_Rev+Unrev51565sequences_Jan2024	32	nuclear speck,cytoplasmic ribonucleoprotein granule	poly(A)+ mRNA export from nucleus	RNA binding	0.5142	0.2301	-0.2841	0.192295	0.485194	0.00257153	0.172596	0.302848	0.0141683	17.52	17.64	17.74	17.67	17.56	17.37	17.51	17.18	17.31	17.34	17.65	17.61	17.45	17.5	18.67	17.49	17.4	3391871	187999	204556	219454	208568	192830	169117	186957	148539	162009	165618	205612	200552	178688	185487
A0A8V1A5R8	A0A8V1A5R8_CHICK	NASP	Nuclear autoantigenic sperm protein	Uniprot_Gallus-gallus(chicken)_Rev+Unrev51565sequences_Jan2024	68				-0.1134	0.9223	1.0358	0.898821	0.474193	0.00319322	0.440678	0.299235	0.0157469	16.8	17.02	17.09	16.83	16.71	17.65	17.75	17.76	18.13	18.28	16.72	16.33	16.33	16.6	19.58	17.38	17.52	3380520	114049	133107	139914	116616	107379	205372	220321	221831	286940	318332	108005	82513.1	82419.9	99634.5
A0A1D5PAR5;A0A8V1ACK7	A0A1D5PAR5_CHICK;A0A8V1ACK7_CHICK	TUBA5	Tubulin alpha chain	Uniprot_Gallus-gallus(chicken)_Rev+Unrev51565sequences_Jan2024	14	cytoplasm,microtubule;	cytoskeleton organization,microtubule-based process;	GTPase activity,structural constituent of cytoskeleton,GTP binding;	-2.2678	-0.5673	1.7005	0.00647223	0.01314	0.0099249	0.0223064	0.032432	0.0279503	16.98	16.87	16.35	17.01	17.11	18.09	18.33	18.25	18.75	19.22	16.01	16.18	16.32	16.45	16.57	17.47	17.58	3362293	129126	119976	83467	131770	141741	279410	329102	311274	439909	610177	65876.5	74349.1	81858.4	89733.6
A0A8V1A0L6;A0A8V1A865	A0A8V1A0L6_CHICK;A0A8V1A865_CHICK	HMGA1	High mobility group AT-hook 1;High mobility group protein HMG-I/HMG-Y	Uniprot_Gallus-gallus(chicken)_Rev+Unrev51565sequences_Jan2024	11	;	;	;	0.6861	0.6127	-0.0733	0.0910293	0.113111	0.409371	0.106476	0.122956	0.274939	17.42	17.39	17.28	17.57	17.27	17.51	17.39	17.3	17.17	17.19	17.7	17.89	17.46	17.89	18.74	17.49	17.42	3350985	175697	171780	159684	194643	158018	186168	172224	161713	147533	149562	212661	242742	179714	242866
R4GLB3	R4GLB3_CHICK	PSMB2	Proteasome subunit beta	Uniprot_Gallus-gallus(chicken)_Rev+Unrev51565sequences_Jan2024	18	nucleoplasm,cytoplasm,proteasome core complex,nucleus	proteolysis involved in cellular protein catabolic process,proteasomal ubiquitin-independent protein catabolic process,proteasomal protein catabolic process,proteasome-mediated ubiquitin-dependent protein catabolic process	threonine-type endopeptidase activity,endopeptidase activity	0.5942	0.59	-0.0042	0.476264	0.477986	0.970609	0.299954	0.300535	0.46249	17.42	17.55	17.43	17.23	17.23	17.38	17.36	17.45	17.6	17.01	16.98	17.16	17.2	17.28	19.41	17.58	17.38	3345296	175410	191612	176085	153509	153812	170590	167684	178797	198740	132126	129158	146372	151078	158849
Q5ZM75	Q5ZM75_CHICK	RCJMB04_2o24	serine--tRNA ligase	Uniprot_Gallus-gallus(chicken)_Rev+Unrev51565sequences_Jan2024	35				-0.4371	0.0989	0.536	0.285734	0.824975	0.0234224	0.221121	0.418345	0.045724	17.21	17.51	17.66	17	17.35	18.01	17.51	17.98	18.24	17.64	17.21	16.84	16.93	17.02	18.52	17.49	17.45	3334000	151654	187264	206829	131252	166852	264166	187293	257824	310335	203908	151559	117385	124921	132795
Q805F9	DDB1_CHICK	DDB1	DNA damage-binding protein 1	Uniprot_Gallus-gallus(chicken)_Rev+Unrev51565sequences_Jan2024	61	nucleus,nucleoplasm,cytoplasm,cullin-RING ubiquitin ligase complex,Cul4A-RING E3 ubiquitin ligase complex,Cul4B-RING E3 ubiquitin ligase complex,Cul4-RING E3 ubiquitin ligase complex	DNA repair,nucleotide-excision repair,Wnt signaling pathway,histone H2A monoubiquitination,negative regulation of apoptotic process,proteasome-mediated ubiquitin-dependent protein catabolic process,positive regulation of viral genome replication,positive regulation of protein catabolic process,positive regulation by virus of viral protein levels in host cell,interaction with symbiont,UV-damage ex…	damaged DNA binding,protein binding, bridging,macromolecular complex binding,WD40-repeat domain binding,cullin family protein binding	0.5636	0.2759	-0.2877	0.248468	0.504592	0.04581	0.202594	0.309681	0.0690154	17.61	17.64	17.62	17.59	17.49	17.39	17.32	17.47	17.44	16.78	17.49	17.47	17.51	17.42	18.83	17.33	17.37	3319547	199363	204075	201065	197107	183651	172096	163688	180956	178157	112214	183716	182135	187210	174839
Q5F3R8	Q5F3R8_CHICK	RAB11B	Ras-related protein Rab-11B	Uniprot_Gallus-gallus(chicken)_Rev+Unrev51565sequences_Jan2024	15	endomembrane system,endosome,recycling endosome	Rab protein signal transduction,regulated exocytosis,intracellular protein transport,constitutive secretory pathway,exocytosis	GTPase activity	0.1326	0.1296	-0.003	0.0858182	0.129906	0.96204	0.102618	0.133988	0.459919	17.41	17.45	17.71	17.57	17.59	17.54	17.51	17.45	17.6	17.62	17.49	17.69	17.65	17.71	17.84	17.48	17.38	3318323	174289	179513	214208	194217	196725	191130	186729	179511	198516	201072	184252	211194	205728	213689
A0A8V0ZYD0	A0A8V0ZYD0_CHICK	TPM1	Tropomyosin 1	Uniprot_Gallus-gallus(chicken)_Rev+Unrev51565sequences_Jan2024	12				3.1374	2.3597	-0.7777	0.0530383	0.0688871	0.0139513	0.0757967	0.0892301	0.0336459	16.59	15.96	16.13	16.81	16.62	15.52	16.01	15.41	15.23	16.04	18.45	18.15	17.83	18.51	20.01	17.14	17.17	3312538	98363.1	63664.3	71557.7	115170	101054	46843.4	66113.9	43483.1	38563.4	67366.6	357390	290896	232453	372246
A0A8V0YRU3	A0A8V0YRU3_CHICK	PPP1R12A	Protein phosphatase 1 regulatory subunit	Uniprot_Gallus-gallus(chicken)_Rev+Unrev51565sequences_Jan2024	70				0.7509	0.4375	-0.3134	0.193215	0.372172	0.00629503	0.173123	0.260329	0.021956	17.58	17.43	17.32	17.67	17.54	17.23	17.36	17.16	17.09	17.16	17.47	17.55	17.51	17.55	18.98	17.45	17.41	3310799	196365	176293	163527	209034	191125	153553	168317	146211	139211	146200	181377	192327	186056	191485
F1NHD1	F1NHD1_CHICK	STAU1	Staufen double-stranded RNA binding protein 1	Uniprot_Gallus-gallus(chicken)_Rev+Unrev51565sequences_Jan2024	38				0.8135	0.4093	-0.4042	0.0128039	0.0716776	0.000554922	0.0320088	0.0914973	0.00662611	17.5	17.53	17.45	17.73	17.56	17.15	17.25	17.15	17.19	17.01	17.74	17.91	17.81	17.79	18.45	17.35	17.36	3308974	185338	189391	178910	216720	193662	145704	155623	145645	149233	132255	218254	246014	229959	226909
A0A8V0XK64	A0A8V0XK64_CHICK	RAD23A	UV excision repair protein RAD23	Uniprot_Gallus-gallus(chicken)_Rev+Unrev51565sequences_Jan2024	16				0.2077	0.4903	0.2826	0.801736	0.593294	0.084228	0.411054	0.340408	0.101368	17.32	17.3	17.56	17.21	17.23	17.41	17.5	17.53	17.54	17.99	17.08	16.72	16.65	16.85	19.4	17.33	17.28	3305801	163466	161122	193109	152099	153780	174620	185434	189675	191158	260913	138166	107605	103021	117865
Q5ZLD1	Q5ZLD1_CHICK	FH	Fumarate hydratase, mitochondrial	Uniprot_Gallus-gallus(chicken)_Rev+Unrev51565sequences_Jan2024	26	mitochondrion,tricarboxylic acid cycle enzyme complex	tricarboxylic acid cycle,fumarate metabolic process,malate metabolic process	fumarate hydratase activity	-0.0689	0.4612	0.5301	0.919642	0.568663	0.0792292	0.447113	0.332085	0.0974407	17.51	17.19	17.29	17.22	16.87	17.5	17.43	18.35	17.52	17.8	16.64	17.06	16.93	16.78	19.15	17.46	17.4	3293036	186998	149576	160551	152398	119904	185190	176104	333823	188439	227553	101940	136488	124657	112880
Q5ZKL0	Q5ZKL0_CHICK	MCM5	DNA replication licensing factor MCM5	Uniprot_Gallus-gallus(chicken)_Rev+Unrev51565sequences_Jan2024	44	nucleoplasm,MCM complex	DNA replication initiation,DNA duplex unwinding	DNA helicase activity,chromatin binding,DNA replication origin binding,ATP binding	-1.5715	-0.7453	0.8262	0.000236428	0.040151	0.00303964	0.00454745	0.0635324	0.0153196	17.32	17.45	17.52	17.4	17.31	18.17	17.83	18.22	18.41	18.44	17.08	16.9	16.98	16.84	13.28	17.46	17.47	3285637	163609	179422	188131	173386	162895	295699	232995	304359	348585	356315	138674	122206	129470	117151
Q5ZKB9	DDX6_CHICK	DDX6	Probable ATP-dependent RNA helicase DDX6	Uniprot_Gallus-gallus(chicken)_Rev+Unrev51565sequences_Jan2024	32	cytoplasmic mRNA processing body,nucleolus,cytosol,cytoplasmic stress granule,RISC complex	regulation of translation,RNA secondary structure unwinding,viral RNA genome packaging,stem cell population maintenance,cytoplasmic mRNA processing body assembly,negative regulation of neuron differentiation	RNA binding,ATP-dependent RNA helicase activity,ATP binding,protein domain specific binding,cadherin binding	-0.4708	-0.2611	0.2097	0.167894	0.43745	0.11107	0.158348	0.285728	0.12134	17.53	17.63	17.8	17.45	17.38	17.83	17.93	17.81	17.85	17.39	17.7	17.6	17.51	17.55	14.06	17.52	17.57	3279413	188847	202482	227728	178876	170648	232920	249300	230160	235792	171959	212600	199255	186793	192470
A0A8V0YYJ9	A0A8V0YYJ9_CHICK	ACTL6A	Actin like 6A	Uniprot_Gallus-gallus(chicken)_Rev+Unrev51565sequences_Jan2024	18				0.6691	0.4017	-0.2673	0.000848036	0.0101952	0.0332999	0.00810805	0.0283222	0.0566583	17.41	17.52	17.5	17.54	17.54	17.29	17.28	17.27	17.43	16.83	17.75	17.82	17.92	17.81	18.18	17.42	17.4	3274702	173725	187574	185944	191115	190081	160784	159399	158154	176893	116161	221153	231613	248182	229112
A0A8V0ZZ97	A0A8V0ZZ97_CHICK	OBSCN	non-specific serine/threonine protein kinase	Uniprot_Gallus-gallus(chicken)_Rev+Unrev51565sequences_Jan2024	422				0.7519	0.0739	-0.6781	0.0234308	0.715076	0.00143528	0.0457354	0.381961	0.0105121	17.85	17.58	17.53	17.76	17.93	16.98	16.95	16.88	16.87	17.51	17.79	18.03	18.05	17.99	16.93	17.42	17.4	3273373	236975	195641	189691	221234	249168	129442	126348	120454	119710	186998	226539	268194	270918	259845
A0A1D5NV94;A0A8V1A4D3	A0A1D5NV94_CHICK;A0A8V1A4D3_CHICK	AP2A2	AP-2 complex subunit alpha	Uniprot_Gallus-gallus(chicken)_Rev+Unrev51565sequences_Jan2024	53	;	;	;	0.5808	0.0922	-0.4885	0.11861	0.730828	0.000818529	0.126398	0.387107	0.0080017	17.65	17.65	17.65	17.79	17.68	17.29	17.29	17.28	17.24	16.83	18.01	18.05	18	17.94	16.2	17.37	17.4	3272380	206320	205680	205639	226470	210288	160552	160756	158900	154751	116555	263124	272088	262828	250809
A0A8V0ZE88	A0A8V0ZE88_CHICK	PPA1	Inorganic pyrophosphatase	Uniprot_Gallus-gallus(chicken)_Rev+Unrev51565sequences_Jan2024	27				0.567	1.7407	1.1737	0.708435	0.434635	0.00107516	0.379711	0.284787	0.00909351	16.26	16.52	16.73	16.1	16.62	17.48	17.21	17.71	17.79	17.9	16.19	15.55	15.57	15.91	20.29	17.07	17.19	3270758	78528.9	94191.5	108512	70342.6	100628	183024	151932	213874	226119	245196	74719.4	48063.7	48511.5	61431.7
A0A8V0XAB1	A0A8V0XAB1_CHICK	STAU2	Double-stranded RNA-binding protein Staufen homolog 2	Uniprot_Gallus-gallus(chicken)_Rev+Unrev51565sequences_Jan2024	36				0.0315	-0.0856	-0.1172	0.631296	0.249194	0.100006	0.353559	0.202935	0.113348	17.6	17.67	17.45	17.75	17.66	17.57	17.63	17.46	17.48	17.42	17.44	17.69	17.61	17.53	17.43	17.39	17.46	3255217	198478	208191	179335	219723	207751	194383	202519	179915	182463	175141	177936	211203	199954	188925
F2Z4K6	F2Z4K6_CHICK	RPL26L1	Large ribosomal subunit protein uL24	Uniprot_Gallus-gallus(chicken)_Rev+Unrev51565sequences_Jan2024	14	nucleoplasm,nucleolus,cytosolic large ribosomal subunit	cytoplasmic translation,rRNA processing,DNA damage response, signal transduction by p53 class mediator resulting in cell cycle arrest,ribosomal large subunit biogenesis,positive regulation of translation,cellular response to gamma radiation,positive regulation of DNA damage response, signal transduction by p53 class mediator resulting in transcription of p21 class mediator,positive regulation of …	RNA binding,structural constituent of ribosome,mRNA 5'-UTR binding,poly(A) RNA binding	0.7889	0.1641	-0.6248	0.25622	0.754963	0.00300966	0.206571	0.395235	0.0152515	17.68	17.57	17.39	17.94	17.79	17.06	17.02	16.94	16.92	17.32	17.23	17.32	17.27	17.37	19.03	17.31	17.37	3252100	209680	194575	171543	252142	226709	136920	133208	125776	124390	163672	153560	163719	158394	169509
F5CE71	F5CE71_CHICK	CTSH	Pro-cathepsin H	Uniprot_Gallus-gallus(chicken)_Rev+Unrev51565sequences_Jan2024	2				1.594	2.04	0.446	0.172341	0.136352	0.543024	0.16096	0.138098	0.323301	16.61	17.23	NA	16.63	16.63	16.65	18.28	15.33	17.28	NA	18.9	NA	17.8	17.62	19.87	16.91	17.36	3247599	100307	153612	1	101399	101231	102611	319261	41189.2	158868	1	488324	1	228350	201012
Q02020	FIBB_CHICK	FGB	Fibrinogen beta chain (Fragment)	Uniprot_Gallus-gallus(chicken)_Rev+Unrev51565sequences_Jan2024	28	fibrinogen complex	signal transduction,platelet activation,protein polymerization	receptor binding,protein binding, bridging,metal ion binding	-1.983	-1.3441	0.6389	0.00136398	0.0202297	0.0503508	0.0102452	0.0419098	0.0732967	17.87	16.64	18.13	17.12	17.59	18.35	18.11	18.31	17.49	18.54	16.5	16.44	16.65	15.13	15.9	17.56	17.55	3242116	239879	101786	286242	142406	197620	333269	283440	325342	183811	381384	92513.6	88866.2	102924	35962.4
A0A1L1RXF5	A0A1L1RXF5_CHICK	TIAL1	RRM domain-containing protein	Uniprot_Gallus-gallus(chicken)_Rev+Unrev51565sequences_Jan2024	17				0.3185	0.1577	-0.1608	0.204137	0.46419	0.106694	0.17936	0.295717	0.118285	17.57	17.55	17.55	17.62	17.51	17.56	17.53	17.43	17.35	17.07	17.92	17.81	17.9	17.93	16.7	17.43	17.26	3241274	194499	192489	192037	200954	186076	192993	188971	176789	167512	137902	247439	230493	244023	249560
Q5ZJ08	SYYC_CHICK	YARS1	Tyrosine--tRNA ligase, cytoplasmic	Uniprot_Gallus-gallus(chicken)_Rev+Unrev51565sequences_Jan2024	52	aminoacyl-tRNA synthetase multienzyme complex,methionyl glutamyl tRNA synthetase complex	tRNA aminoacylation for protein translation,tyrosyl-tRNA aminoacylation	tRNA binding,tyrosine-tRNA ligase activity,ATP binding	0.3462	0.8413	0.4951	0.728478	0.482421	0.0147999	0.386264	0.30184	0.0348124	16.98	17.17	17.33	16.81	17.03	17.65	17.3	17.68	17.85	17.29	16.85	16.53	16.66	16.73	19.63	17.36	17.37	3237049	129280	147907	164314	114855	133870	205073	161097	209631	236560	160430	118153	94767.2	103649	108385
A0A8V0XBA1	A0A8V0XBA1_CHICK	LSM8	U6 snRNA-associated Sm-like protein LSm8	Uniprot_Gallus-gallus(chicken)_Rev+Unrev51565sequences_Jan2024	7				0.5271	0.8636	0.3365	0.0476092	0.00899128	0.147587	0.0707566	0.0264574	0.145401	16.97	16.83	17.48	17.01	17.27	17.33	17.62	17.15	17.15	17.92	17.91	17.9	17.66	17.88	18.48	17.19	17.21	3232134	128376	116617	182319	132280	158242	165108	202061	145059	145852	248325	247080	245063	206707	241179
A0A8V0Y589;A0A8V0Y929;Q90YB6	A0A8V0Y589_CHICK;A0A8V0Y929_CHICK;Q90YB6_CHICK	PRPF40A;PRPF40A;	Pre-mRNA processing factor 40 homolog A;Pre-mRNA processing factor 40 homolog A;Formin binding protein 11-related protein (Fragment)	Uniprot_Gallus-gallus(chicken)_Rev+Unrev51565sequences_Jan2024	33	;;	;;	;;	0.8712	0.4087	-0.4625	9.53936e-05	0.000458531	0.00667151	0.00300494	0.00603521	0.0227064	17.61	17.38	17.42	17.72	17.49	17.09	17.43	17.06	16.88	16.78	17.82	18.02	17.93	18	17.92	17.41	17.37	3230991	199902	170485	174972	215746	184566	139547	177089	136661	120359	112647	231792	265555	248892	261288
A0A8V0ZVA8;A0A8V0ZVB3;E1BV44	A0A8V0ZVA8_CHICK;A0A8V0ZVB3_CHICK;E1BV44_CHICK	CSE1L	Exportin-2	Uniprot_Gallus-gallus(chicken)_Rev+Unrev51565sequences_Jan2024	58	;;nuclear envelope,nucleoplasm,cytosol	;;protein import into nucleus,protein export from nucleus	;;nuclear export signal receptor activity,Ran GTPase binding,protein transporter activity	-0.8094	-0.5199	0.2895	0.00497343	0.0461344	0.0575973	0.0195596	0.0693131	0.0796808	17.39	17.73	17.79	17.38	17.54	17.92	17.85	17.95	18.07	17.48	17.47	17.16	17.2	17.17	15.8	17.38	17.49	3208303	171740	217955	226281	170300	191221	248369	235988	253333	274878	182185	180948	146320	150207	147241
A0A1D5P0D3;A0A8V0XU23;F1NLE7	A0A1D5P0D3_CHICK;A0A8V0XU23_CHICK;F1NLE7_CHICK	AIMP1	Aminoacyl tRNA synthetase complex interacting multifunctional protein 1	Uniprot_Gallus-gallus(chicken)_Rev+Unrev51565sequences_Jan2024	29	;;cytosol,cell surface,aminoacyl-tRNA synthetase multienzyme complex,methionyl glutamyl tRNA synthetase complex	;;negative regulation of endothelial cell proliferation,tRNA aminoacylation for protein translation,inflammatory response,cell-cell signaling,regulation of receptor activity,leukocyte migration	;;tRNA binding,cytokine activity,protein homodimerization activity,GTPase binding	0.9381	0.7698	-0.1683	0.341234	0.403429	0.0178771	0.246915	0.272651	0.0388808	17.33	17.33	17.14	17.32	17.33	17.07	17.16	17.25	17.15	16.99	17.14	17.26	17.26	17.22	19.53	17.23	17.28	3201654	164802	165103	144851	163658	165228	137125	146932	155594	145697	129817	144293	156797	157048	152689
E1BYF1	E1BYF1_CHICK	CTH	Cystathionine gamma-lyase	Uniprot_Gallus-gallus(chicken)_Rev+Unrev51565sequences_Jan2024	25	cytoplasm	protein-pyridoxal-5-phosphate linkage via peptidyl-N6-pyridoxal phosphate-L-lysine,cysteine biosynthetic process via cystathionine,transsulfuration,positive regulation of I-kappaB kinase/NF-kappaB signaling,protein sulfhydration,positive regulation of NF-kappaB transcription factor activity,protein homotetramerization,hydrogen sulfide biosynthetic process,'de novo' L-methionine biosynthetic proce…	cystathionine gamma-synthase activity,cystathionine gamma-lyase activity,pyridoxal phosphate binding,identical protein binding,L-cystine L-cysteine-lyase (deaminating)	0.4095	1.0394	0.6299	0.743872	0.50644	0.00575284	0.391441	0.310395	0.0209863	16.96	17.11	17	16.52	17.02	17.61	17.16	17.55	17.86	17.57	16.17	16.39	16.04	16.26	19.91	17.3	17.18	3197297	127073	141541	131521	94175.9	133020	199590	146483	191929	238473	194320	73816.4	86063.6	67174.9	78390.1
Q5F418	PSMD1_CHICK	PSMD1	26S proteasome non-ATPase regulatory subunit 1	Uniprot_Gallus-gallus(chicken)_Rev+Unrev51565sequences_Jan2024	51	nucleus,proteasome regulatory particle, base subcomplex,proteasome accessory complex,proteasome storage granule	regulation of protein catabolic process,proteasome-mediated ubiquitin-dependent protein catabolic process,regulation of catalytic activity	enzyme regulator activity,endopeptidase activity	-0.0194	-0.3677	-0.3483	0.924865	0.0631045	0.0186395	0.448771	0.0845269	0.0398988	17.76	17.8	17.67	17.88	17.69	17.43	17.36	17.59	17.62	16.96	17.47	17.59	17.6	17.53	16.52	17.34	17.38	3180709	221533	227771	208527	241122	211833	176967	168444	197282	201966	127867	181348	197164	198908	189405
A0A8V0XT53	A0A8V0XT53_CHICK	PALLD	Palladin, cytoskeletal associated protein	Uniprot_Gallus-gallus(chicken)_Rev+Unrev51565sequences_Jan2024	70				-0.5863	-0.3166	0.2697	0.0417956	0.239901	0.0559634	0.0652307	0.197964	0.0783303	17.61	17.38	17.28	17.69	17.62	17.7	17.94	17.5	17.77	18.01	16.91	16.99	16.94	16.89	17.96	17.39	17.34	3170301	199841	170424	158651	211107	201682	212621	250614	185781	223004	263292	123229	130087	126035	121445
A0A1D5PYQ3	A0A1D5PYQ3_CHICK	GSPT2	Eukaryotic peptide chain release factor GTP-binding subunit	Uniprot_Gallus-gallus(chicken)_Rev+Unrev51565sequences_Jan2024	32			GTPase activity,GTP binding	-0.9058	-0.6457	0.2601	0.00164795	0.0140952	0.0375655	0.0112784	0.0338058	0.0608948	17.48	17.69	17.83	17.4	17.53	17.94	17.63	17.96	17.99	17.71	17.34	17.01	17.05	17.11	15.78	17.43	17.37	3151954	183235	210972	232287	173294	189469	251483	203468	254903	259979	214870	166199	131937	136139	141623
A0A8V0YLI3	A0A8V0YLI3_CHICK	TCERG1	Transcription elongation regulator 1	Uniprot_Gallus-gallus(chicken)_Rev+Unrev51565sequences_Jan2024	58				0.8937	0.8488	-0.0448	0.258355	0.27373	0.549249	0.207596	0.215477	0.325387	17.08	17.31	17.34	17.12	17.08	17.19	17.2	17.17	17.17	16.98	17.46	17.41	17.32	17.47	19.3	17.36	17.25	3140296	138147	162209	165971	142050	138568	149081	150601	147768	147609	129038	179975	174673	163295	181153
A0A8V0YMR4	A0A8V0YMR4_CHICK	COL18A1	Collagen, type XVIII, alpha 1	Uniprot_Gallus-gallus(chicken)_Rev+Unrev51565sequences_Jan2024	29				0.8257	0.6103	-0.2154	0.0138357	0.033739	0.0924854	0.0334544	0.0571734	0.107548	17.51	17.2	17.32	17.27	17.4	17.12	16.99	17.18	16.86	17.44	17.61	17.92	17.84	17.79	18.47	17.24	17.3	3136772	187202	150613	164111	157819	172700	142413	130094	148172	118705	177618	199693	248551	234189	226403
A0A8V0YD87;A0A8V0YLJ3;A0A8V0YRF9	A0A8V0YD87_CHICK;A0A8V0YLJ3_CHICK;A0A8V0YRF9_CHICK	AKR1D1	Aldo-keto reductase family 1 member D1	Uniprot_Gallus-gallus(chicken)_Rev+Unrev51565sequences_Jan2024	25	;;	;;	;;	-1.1515	2.103	3.2545	0.032539	0.0118758	0.00697912	0.0558696	0.0306884	0.0232424	14.72	15.28	15.86	14.65	15.21	18.38	17.82	18.13	19.21	18.4	17.99	16.8	16.65	17.1	17.6	17.24	17.3	3136121	26980.4	39883.8	59535.3	25669	37911.6	341718	231604	287682	605466	346643	260761	113870	103060	140026
F1NPQ0	F1NPQ0_CHICK	PSMD12	Proteasome 26S subunit, non-ATPase 12	Uniprot_Gallus-gallus(chicken)_Rev+Unrev51565sequences_Jan2024	32	cytoplasm,proteasome regulatory particle, lid subcomplex,nuclear proteasome complex	proteasome-mediated ubiquitin-dependent protein catabolic process		0.083	-0.3605	-0.4435	0.688365	0.0798189	0.0008574	0.372896	0.0979071	0.00815772	17.82	17.74	17.67	17.84	17.74	17.29	17.28	17.44	17.49	17.04	17.52	17.54	17.66	17.54	16.45	17.39	17.36	3134237	231445	218467	207902	234998	218413	160236	159278	178417	184252	134928	188213	190736	206808	190168
A0A1L1RX26	A0A1L1RX26_CHICK	ETF1	Eukaryotic peptide chain release factor subunit 1	Uniprot_Gallus-gallus(chicken)_Rev+Unrev51565sequences_Jan2024	26				-0.9051	-0.5335	0.3716	0.0056176	0.0685363	0.0312169	0.020749	0.0889546	0.0545079	17.32	17.62	17.71	17.37	17.48	18.02	17.72	17.98	18.09	17.51	17.33	17.11	17.21	17.19	15.15	17.49	17.33	3130729	163728	201927	213904	169588	183016	265148	215339	258774	279924	186859	164892	141738	151914	149056
A0A1C9KD18;P17785	A0A1C9KD18_CHICK;ANXA2_CHICK	ANXA2	Annexin;Annexin A2	Uniprot_Gallus-gallus(chicken)_Rev+Unrev51565sequences_Jan2024	32	;basement membrane,plasma membrane,extracellular matrix,vesicle,macromolecular complex,calcium channel complex	;growth plate cartilage development,regulation of plasminogen activation,bone mineralization,positive regulation of chondrocyte differentiation,transforming growth factor beta3 production,transforming growth factor beta3 activation,negative regulation of catalytic activity,regulation of cytosolic calcium ion concentration,positive regulation of calcium ion transport,calcium ion homeostasis,endoca…	;phospholipase inhibitor activity,calcium channel activity,calcium ion binding,calcium-dependent phospholipid binding,cytoskeletal protein binding,virion binding,voltage-gated calcium channel activity involved in regulation of cytosolic calcium ion concentration	1.7436	1.4241	-0.3195	0.17146	0.211204	0.119112	0.160428	0.183177	0.126701	16.64	16.91	17.18	16.57	17.28	16.67	16.36	16.59	16.56	16.89	17.9	17.38	17.59	17.4	19.79	17.29	17.16	3130314	102241	122882	148575	97040.4	159010	104194	83850.6	98474.7	96476.2	121649	244487	170345	197046	172764
A0A8V0XLV1	A0A8V0XLV1_CHICK	COPG2	Coatomer subunit gamma	Uniprot_Gallus-gallus(chicken)_Rev+Unrev51565sequences_Jan2024	49				0.1828	-0.1871	-0.3699	0.562988	0.496356	0.00382685	0.330097	0.306685	0.0172471	17.63	17.75	17.66	17.67	17.7	17.41	17.38	17.36	17.39	16.97	17.73	17.82	17.74	17.65	15.58	17.42	17.33	3129857	202753	220610	207235	208705	212629	174727	171126	168547	171670	127942	218101	231584	218841	206353
A0A8V0Y8F5	A0A8V0Y8F5_CHICK	SNRPD2	Small nuclear ribonucleoprotein Sm D2	Uniprot_Gallus-gallus(chicken)_Rev+Unrev51565sequences_Jan2024	16				1.6297	1.2762	-0.3534	0.144388	0.191489	0.0600322	0.143222	0.172216	0.0818031	17.04	16.68	17.09	17.36	17	16.62	17.1	16.64	16.43	16.6	17.46	17.31	17.81	17.96	19.64	16.94	17.07	3116684	135223	105105	139261	168200	130912	101012	140491	102213	88398.8	99114.8	180244	162414	230164	255391
A0A8V0XTR4	A0A8V0XTR4_CHICK	CTNNA1	Catenin alpha 1	Uniprot_Gallus-gallus(chicken)_Rev+Unrev51565sequences_Jan2024	43				-0.0903	-0.0263	0.064	0.571071	0.867851	0.554057	0.332957	0.431544	0.327062	17.58	17.37	17.27	17.67	17.54	17.48	17.77	17.67	17.46	17.37	17.42	17.64	17.66	17.61	16.84	17.29	17.35	3115088	195516	168811	158293	208565	190003	182406	223062	208536	179724	169246	175767	204284	207349	199848
A0A8V0XUY7;A0A8V0XUZ3;Q9YGW6	A0A8V0XUY7_CHICK;A0A8V0XUZ3_CHICK;Q9YGW6_CHICK	EZR	Ezrin	Uniprot_Gallus-gallus(chicken)_Rev+Unrev51565sequences_Jan2024	42	;;actin filament,actin cytoskeleton,extrinsic component of membrane	;;actin filament bundle assembly	;;cell adhesion molecule binding,actin filament binding	-1.6146	-0.3622	1.2524	0.000384491	0.343724	0.000918071	0.00561388	0.247991	0.00844195	16.94	17.16	17.2	16.68	16.99	18.26	17.76	18.32	18.46	18.4	16.36	16.03	16.18	16.25	17.67	17.51	17.44	3103891	125411	146780	150763	105083	130305	313333	222335	326957	360876	344889	84331.3	67083.3	74475.3	78092.5
A0A8V0ZRT5	A0A8V0ZRT5_CHICK	DYNC1I2	Dynein cytoplasmic 1 intermediate chain 2	Uniprot_Gallus-gallus(chicken)_Rev+Unrev51565sequences_Jan2024	26				0.5496	0.1725	-0.3771	0.0478724	0.381388	0.000207652	0.0710248	0.263979	0.00428418	17.54	17.65	17.46	17.48	17.61	17.18	17.18	17.22	17.27	16.99	17.45	17.59	17.57	17.58	18.26	17.34	17.31	3103159	190037	205264	179704	182587	200192	148542	148170	152837	158185	129748	178490	197286	194744	196022
Q5F3M8	Q5F3M8_CHICK	OXCT1	Succinyl-CoA:3-ketoacid-coenzyme A transferase	Uniprot_Gallus-gallus(chicken)_Rev+Unrev51565sequences_Jan2024	26				-0.6705	0.1041	0.7746	0.227594	0.84834	0.0989823	0.191802	0.425495	0.112644	17.57	17.09	17.19	17.16	16.62	17.56	17.25	18.68	17.5	18.17	16.51	16.65	16.92	16.61	18.47	17.37	17.3	3096394	194261	139596	149642	146381	100589	193119	155678	419421	185909	295495	93606.7	102909	124412	100352
A0A3Q2UCF3	A0A3Q2UCF3_CHICK	EIF3G	Eukaryotic translation initiation factor 3 subunit G	Uniprot_Gallus-gallus(chicken)_Rev+Unrev51565sequences_Jan2024	25				0.2065	0.2036	-0.0029	0.46791	0.472368	0.958272	0.297082	0.298648	0.45877	17.38	17.44	17.32	17.51	17.48	17.34	17.52	17.37	17.36	17.53	17.32	17.37	17.47	17.32	18.36	17.22	17.3	3092145	170408	178360	163950	186639	182617	165832	187638	169683	168001	189056	163546	169573	181532	164178
A0A8V1A3Y3	A0A8V1A3Y3_CHICK	RPS27	40S ribosomal protein S27	Uniprot_Gallus-gallus(chicken)_Rev+Unrev51565sequences_Jan2024	3				-1.4954	-0.7032	0.7922	3.92191e-05	0.00718685	0.00062342	0.00202613	0.0235415	0.00702019	17.54	17.02	17.4	17.19	17.52	18	18.14	17.91	18.19	18.41	16.56	16.76	17.04	16.83	15.7	17.13	17.25	3090641	190800	132624	173458	149831	187576	262762	289785	246797	298056	347329	96668.7	111062	135037	116449
F1NYI3	F1NYI3_CHICK	RTCB	RNA-splicing ligase RtcB homolog	Uniprot_Gallus-gallus(chicken)_Rev+Unrev51565sequences_Jan2024	31	cytoplasm,tRNA-splicing ligase complex	tRNA splicing, via endonucleolytic cleavage and ligation	RNA ligase (ATP) activity,ATP binding,metal ion binding	0.0095	-0.1778	-0.1873	0.961186	0.331475	0.0510008	0.459591	0.242559	0.0738731	17.58	17.58	17.61	17.61	17.64	17.54	17.48	17.46	17.46	17.1	17.62	17.57	17.65	17.51	16.51	17.34	17.36	3083100	195740	196152	199379	199376	204636	190463	182440	180342	180689	140150	200867	194009	205380	186126
A0A8V0XRS8	A0A8V0XRS8_CHICK	CDC5L	Cell division cycle 5 like	Uniprot_Gallus-gallus(chicken)_Rev+Unrev51565sequences_Jan2024	53				0.851	0.3569	-0.4941	7.56468e-05	0.00499086	0.000809867	0.00269578	0.0195948	0.00796598	17.54	17.4	17.35	17.64	17.47	17.1	17.18	17.01	16.95	16.66	17.72	17.87	17.7	17.84	18.05	17.43	17.31	3082188	190978	173066	167534	204720	181277	140792	148247	132140	126820	103473	215915	239509	212792	234590
A0A8V0YD20;A0A8V0YHR2;P40618	A0A8V0YD20_CHICK;A0A8V0YHR2_CHICK;HMGB3_CHICK	HMGB3	High mobility group box 3;High mobility group box 3;High mobility group protein B3	Uniprot_Gallus-gallus(chicken)_Rev+Unrev51565sequences_Jan2024	16	;;nucleus,chromosome,cytoplasm	;;transcription, DNA-templated,regulation of transcription, DNA-templated,DNA geometric change,innate immune response,negative regulation of B cell differentiation,negative regulation of myeloid cell differentiation,chromatin remodeling	;;four-way junction DNA binding,RNA binding,DNA binding, bending,chromatin binding	0.8946	2.1865	1.2919	0.604135	0.39428	0.0318255	0.344086	0.268989	0.0551223	15.83	16.01	16.39	15.89	16.19	16.92	17.09	17	17.29	18.16	16.03	15.68	15.52	15.94	20.36	17.23	17.25	3078843	58450.1	66038	86143.2	60746.3	74689.8	123638	139883	131130	160422	292284	67045.9	52421	46890.1	62870.2
P13648	LMNA_CHICK	LMNA	Lamin-A	Uniprot_Gallus-gallus(chicken)_Rev+Unrev51565sequences_Jan2024	55	nucleus,intermediate filament		structural molecule activity	0.6024	0.4999	-0.1025	0.0841653	0.119012	0.538558	0.101357	0.126649	0.321726	17.5	17.15	17.33	17.27	17.36	17.27	17.54	17.15	16.58	17.41	17.97	18.16	17.96	17.99	16.57	17.35	17.27	3075911	185372	145578	164531	158051	168674	158187	191056	145021	97654.8	173907	257270	292280	255675	259949
A0A8V0XGT9;A0A8V0XGU9;A0A8V0XNE1;A0A8V0XNE6;A0A8V0XR39	A0A8V0XGT9_CHICK;A0A8V0XGU9_CHICK;A0A8V0XNE1_CHICK;A0A8V0XNE6_CHICK;A0A8V0XR39_CHICK	MAPRE2	Microtubule-associated protein RP/EB family member 2	Uniprot_Gallus-gallus(chicken)_Rev+Unrev51565sequences_Jan2024	16	;;;;	;;;;	;;;;	-0.6501	-0.2692	0.3809	0.0313598	0.362568	0.0241458	0.0546792	0.256247	0.0465316	17.33	17.51	17.75	16.97	17.33	17.81	17.54	17.71	17.93	17.89	17.25	16.61	16.7	16.81	17.87	17.64	17.3	3075312	164934	186504	219873	128586	164895	229409	190277	213933	250342	242116	156278	100218	106571	114501
A0A8V0YUB5;Q5XXA9	A0A8V0YUB5_CHICK;PSIP1_CHICK	PSIP1	PC4 and SFRS1 interacting protein 1;Lens epithelium-derived growth factor	Uniprot_Gallus-gallus(chicken)_Rev+Unrev51565sequences_Jan2024	29	;nucleus,nuclear heterochromatin,transcriptionally active chromatin	;mRNA 5'-splice site recognition,transcription from RNA polymerase II promoter,response to oxidative stress,response to heat,positive regulation of transcription from RNA polymerase II promoter	;RNA polymerase II transcription coactivator activity,chromatin binding,activating transcription factor binding,supercoiled DNA binding	0.3593	0.6445	0.2853	0.50112	0.29386	0.00897175	0.308452	0.225123	0.0264454	16.92	17.24	17.34	17.08	17.11	17.51	17.47	17.28	17.53	17.36	17.44	17.28	17.15	17.25	18.92	17.26	17.36	3065894	124049	155311	165353	138744	141438	186414	180992	159271	189046	167670	177754	158692	145450	155517
Q5ZMV5	Q5ZMV5_CHICK	ARPC5	Actin-related protein 2/3 complex subunit 5	Uniprot_Gallus-gallus(chicken)_Rev+Unrev51565sequences_Jan2024	12	Arp2/3 protein complex,lamellipodium	cell migration,Arp2/3 complex-mediated actin nucleation	structural constituent of cytoskeleton,actin filament binding	0.6444	1.2363	0.5919	0.409334	0.214703	0.001239	0.274939	0.185125	0.00977549	16.68	16.72	17.07	16.59	16.8	17.26	17.49	17.32	17.16	17.58	17.44	17.06	17.19	17.49	19.37	17.29	17.3	3056709	105075	107747	137430	98334.9	113828	157281	184279	163948	146281	195926	177887	136743	149037	183948
E1BRU3	E1BRU3_CHICK	RBM23	RNA binding motif protein 39	Uniprot_Gallus-gallus(chicken)_Rev+Unrev51565sequences_Jan2024	26	microtubule organizing center,nuclear speck,macromolecular complex	mRNA processing	RNA binding	0.329	0.0684	-0.2606	0.395029	0.836757	0.0750696	0.269286	0.421864	0.0941346	17.37	17.48	17.58	17.68	17.51	17.45	17.5	17.37	17.09	16.84	17.76	17.96	17.94	17.81	15.09	17.42	17.21	3056528	169850	182615	196510	210534	187046	178974	185338	169051	139789	116959	222335	255293	250651	229273
A0A1D5PUM9	A0A1D5PUM9_CHICK	FAM83H	Family with sequence similarity 83 member H	Uniprot_Gallus-gallus(chicken)_Rev+Unrev51565sequences_Jan2024	13				-0.8185	0.7861	1.6046	0.323473	0.54251	0.0201615	0.239017	0.323139	0.0418545	16.84	16.66	16.51	16.37	16.82	17.82	18.05	17.74	18.25	19.02	16.25	15.96	15.98	NA	18.94	16.9	17.12	3053700	117151	103335	93180.3	84776.7	116005	231843	272128	219421	311223	529867	77954.2	63701.3	64638.6	1
A0A8V0X5G9	A0A8V0X5G9_CHICK	OTUB1	ubiquitinyl hydrolase 1	Uniprot_Gallus-gallus(chicken)_Rev+Unrev51565sequences_Jan2024	3				-1.7167	-0.7621	0.9546	6.40624e-05	0.0237433	0.000627663	0.00251125	0.0461208	0.00702491	17.14	17.41	17.55	16.7	17.26	18.06	17.9	18.16	18.46	18.33	17.06	16.43	16.46	16.74	14.93	17.28	17.32	3053036	144167	173996	192052	106202	157489	272415	244712	291938	360939	329838	136965	88582.7	90187.2	109324
Q90953	CSPG2_CHICK	VCAN	Versican core protein	Uniprot_Gallus-gallus(chicken)_Rev+Unrev51565sequences_Jan2024	103	proteinaceous extracellular matrix	skeletal system development,cell adhesion,central nervous system development	extracellular matrix structural constituent,calcium ion binding,hyaluronic acid binding,carbohydrate binding	-0.4343	0.1399	0.5742	0.419881	0.818281	0.0326828	0.27906	0.416121	0.0560218	17.31	17.08	16.95	17.31	17.31	17.73	17.75	17.44	17.56	18.26	16.44	16.79	16.69	16.72	18.66	17.33	17.32	3035071	162746	138524	126730	162915	162800	217063	220013	178197	193136	313798	89003.2	113337	105508	108151
A0A1D5P1U2;A0A8V0ZGB4	A0A1D5P1U2_CHICK;A0A8V0ZGB4_CHICK	PDHB	Pyruvate dehydrogenase E1 component subunit beta	Uniprot_Gallus-gallus(chicken)_Rev+Unrev51565sequences_Jan2024	18	;	;	;	-0.2047	-0.1899	0.0148	0.708479	0.716672	0.964536	0.379713	0.382508	0.460665	18.1	17.28	17.41	17.54	16.99	17.09	17.2	18.15	16.88	17.9	16.32	16.86	16.99	16.73	18.54	17.24	17.36	3026271	281870	158948	174579	190776	130157	139403	150808	290058	120306	245398	82024.7	119139	130276	108372
Q90WD0	ARP3_CHICK	ACTR3	Actin-related protein 3	Uniprot_Gallus-gallus(chicken)_Rev+Unrev51565sequences_Jan2024	23	cytoplasm,Arp2/3 protein complex,brush border,cell-cell junction,lamellipodium	establishment or maintenance of cell polarity,asymmetric cell division,meiotic chromosome movement towards spindle pole,meiotic cytokinesis,Arp2/3 complex-mediated actin nucleation,spindle localization,cilium morphogenesis,cellular response to interferon-gamma	structural constituent of cytoskeleton,ATP binding,actin filament binding	0.1217	0.3125	0.1909	0.523516	0.118706	0.181535	0.316461	0.12647	0.166333	17.27	17.29	17.37	17.17	17.32	17.57	17.37	17.66	17.65	17.03	17.58	17.3	17.41	17.51	18.06	17.31	17.3	3023566	158228	159925	169008	147230	163335	194918	169510	207385	205107	133653	196159	161291	173823	187019
E1BX02;Q5ZLU4	E1BX02_CHICK;Q5ZLU4_CHICK	PSMD2;RCJMB04_4n15	26S proteasome non-ATPase regulatory subunit 2	Uniprot_Gallus-gallus(chicken)_Rev+Unrev51565sequences_Jan2024	66	nucleus,proteasome regulatory particle, base subcomplex,proteasome storage granule;	regulation of protein catabolic process,proteasome-mediated ubiquitin-dependent protein catabolic process,regulation of catalytic activity;	enzyme regulator activity,endopeptidase activity;	0.0116	-0.3104	-0.3221	0.936755	0.0162132	0.025965	0.452415	0.0367144	0.0486733	17.59	17.81	17.71	17.56	17.58	17.38	17.3	17.47	17.55	16.87	17.33	17.49	17.49	17.4	16.95	17.35	17.32	3018237	197955	229758	214026	193737	195763	170670	161528	181309	191792	119598	164626	183450	183831	173187
P31395	STMN1_CHICK	STMN1	Stathmin	Uniprot_Gallus-gallus(chicken)_Rev+Unrev51565sequences_Jan2024	14	cytoplasm,microtubule,neuron projection	microtubule depolymerization,regulation of microtubule polymerization or depolymerization,neuron projection development,regulation of cytoskeleton organization	protein binding,tubulin binding	2.5327	3.7199	1.1872	0.436771	0.389431	0.0299889	0.285512	0.266974	0.053078	14.88	14.95	15.62	14.7	14.88	15.72	16.25	16.05	15.8	16.97	14.73	13.48	13.61	14.52	21.04	16.77	16.93	3017455	30160.8	31621.1	50429.1	26696.6	30125.8	53884.7	77667.7	67853.8	57229.9	128276	27143.3	11409.8	12527	23558.8
A0A8V0YNQ1;Q5ZKA4	A0A8V0YNQ1_CHICK;EIF3J_CHICK	EIF3J	Eukaryotic translation initiation factor 3 subunit J	Uniprot_Gallus-gallus(chicken)_Rev+Unrev51565sequences_Jan2024	22	;eukaryotic translation initiation factor 3 complex	;translational initiation	;translation initiation factor activity	0.254	0.5834	0.3294	0.722355	0.47204	0.111043	0.384178	0.298511	0.121324	16.98	17.06	17.46	16.93	17.19	17.35	17.41	17.28	17.25	17.93	17	16.77	16.9	17.07	19.14	17.2	17.29	3015916	129012	136353	180578	124474	149990	167248	173615	159271	155979	249100	131152	112048	122605	137411
A0A8V0XI26;A0A8V0XJ85;F1NV49	A0A8V0XI26_CHICK;A0A8V0XJ85_CHICK;F1NV49_CHICK	DDX1	ATP-dependent RNA helicase	Uniprot_Gallus-gallus(chicken)_Rev+Unrev51565sequences_Jan2024	52	;;cytosol,cytoplasmic stress granule,cleavage body,tRNA-splicing ligase complex	;;double-strand break repair,tRNA splicing, via endonucleolytic cleavage and ligation,multicellular organism development,response to virus,DNA duplex unwinding,response to exogenous dsRNA,nucleic acid phosphodiester bond hydrolysis,regulation of nucleic acid-templated transcription,protein localization to cytoplasmic stress granule	;;chromatin binding,transcription cofactor activity,double-stranded RNA binding,nuclease activity,ATP binding,ATP-dependent helicase activity,poly(A) binding,DNA/RNA helicase activity	-0.1251	-0.2689	-0.1438	0.68732	0.368905	0.159454	0.372576	0.259037	0.153128	17.47	17.65	17.6	17.61	17.62	17.65	17.47	17.51	17.44	17.1	17.57	17.61	17.63	17.53	14.96	17.23	17.3	3013675	181369	206357	198102	199932	201010	206092	181856	186252	178138	140833	194522	199721	202915	189849
E1BXG9	E1BXG9_CHICK	PPID	peptidylprolyl isomerase	Uniprot_Gallus-gallus(chicken)_Rev+Unrev51565sequences_Jan2024	26	nucleolus,cytosol	negative regulation of transcription from RNA polymerase II promoter,protein peptidyl-prolyl isomerization,lipid particle organization,regulation of apoptotic process,positive regulation of apoptotic process,positive regulation of viral genome replication,positive regulation of protein secretion,chaperone-mediated protein folding,macromolecular complex assembly,cellular response to UV-A	peptidyl-prolyl cis-trans isomerase activity,progesterone receptor binding,Hsp90 protein binding	-0.1075	0.6716	0.7791	0.909618	0.591155	0.00361044	0.44412	0.339729	0.0167879	16.49	17.13	17.3	16.56	17	17.78	17.35	17.72	18.04	17.58	16.52	16	15.9	16.08	19.43	17.22	17.2	2996166	92317.2	143073	161595	96890.7	131125	225190	167018	215247	269467	195646	94144	65673.2	61249.8	69357.7
E1BVP1	E1BVP1_CHICK	EIF5B	Eukaryotic translation initiation factor 5B	Uniprot_Gallus-gallus(chicken)_Rev+Unrev51565sequences_Jan2024	75	cytoplasm	translational initiation,regulation of translational initiation	translation initiation factor activity,GTPase activity,GTP binding	0.0476	-0.1793	-0.227	0.814243	0.328273	0.0547843	0.414908	0.241087	0.0773647	17.44	17.68	17.56	17.57	17.59	17.48	17.28	17.47	17.45	16.96	17.53	17.52	17.55	17.58	16.48	17.38	17.32	2994092	177238	209514	193030	194053	197780	182621	159578	181739	179090	127149	189831	188437	192148	196189
P21868	CSK21_CHICK	CSNK2A1	Casein kinase II subunit alpha	Uniprot_Gallus-gallus(chicken)_Rev+Unrev51565sequences_Jan2024	22	PcG protein complex	protein phosphorylation,Wnt signaling pathway,rhythmic process	protein serine/threonine kinase activity,ATP binding	0.3963	-0.023	-0.4193	0.00967961	0.582756	0.00574852	0.0275652	0.337117	0.0209748	17.54	17.59	17.68	17.54	17.47	17.29	17.27	17.22	17.19	16.68	17.61	17.51	17.54	17.51	17.55	17.36	17.41	2992153	190881	197699	209818	189951	181585	160223	157970	152649	149813	104664	199534	186294	190267	186740
B3Y932	B3Y932_CHICK	chApex1	DNA-(apurinic or apyrimidinic site) endonuclease	Uniprot_Gallus-gallus(chicken)_Rev+Unrev51565sequences_Jan2024	28				0.3322	0.932	0.5998	0.75395	0.479336	0.012209	0.394877	0.300942	0.0311414	16.8	16.96	17.17	16.49	16.86	17.67	17.16	17.5	17.76	17.17	16.69	16.21	16.27	16.58	19.59	17.47	17.2	2988110	113716	127624	147758	92196.7	119359	209031	146701	184900	222335	147356	105429	75639.5	79286.3	97757
A0A8V0YUN3;A0A8V0Z2V3;A0A8V0Z8L1	A0A8V0YUN3_CHICK;A0A8V0Z2V3_CHICK;A0A8V0Z8L1_CHICK	PARP1	Poly [ADP-ribose] polymerase	Uniprot_Gallus-gallus(chicken)_Rev+Unrev51565sequences_Jan2024	72	;;	;;	;;	-0.4131	-0.0096	0.4035	0.145988	0.972447	0.0106986	0.144271	0.462987	0.029019	17.23	17.34	17.35	17.2	17.3	17.77	17.56	17.74	17.9	17.43	17.61	17.49	17.44	17.51	15.47	17.34	17.39	2986454	153863	165818	167156	150731	160994	224064	192869	219410	243865	176072	199731	183757	177369	187003
Q5ZLP4	Q5ZLP4_CHICK	RCJMB04_5f2	Serine/threonine-protein phosphatase 2A 55 kDa regulatory subunit B	Uniprot_Gallus-gallus(chicken)_Rev+Unrev51565sequences_Jan2024	26				-0.768	-0.5962	0.1718	0.0146422	0.04684	0.12653	0.0346046	0.0699941	0.131807	17.44	17.69	17.67	17.33	17.53	17.83	17.48	17.74	17.87	17.59	17.31	16.96	17.22	17.19	15.14	17.35	17.35	2985413	177636	211556	208302	164386	189075	232371	182190	219614	239909	197115	162874	127784	152321	149844
A0A1D5PJI5;A0A8V0XBE4;A0A8V0XH26;A0A8V0XI47;A0A8V0XI52	A0A1D5PJI5_CHICK;A0A8V0XBE4_CHICK;A0A8V0XH26_CHICK;A0A8V0XI47_CHICK;A0A8V0XI52_CHICK	SEPTIN11	Septin;Septin-11;Septin;Septin;Septin	Uniprot_Gallus-gallus(chicken)_Rev+Unrev51565sequences_Jan2024	26	;;;;	;;;;	;;;;	0.8953	0.8026	-0.0928	0.00269093	0.00350923	0.0321704	0.0144609	0.0165357	0.0555223	17.09	17.22	17.11	17.12	17.2	17.02	17.06	17.11	17.09	16.99	18.02	17.89	18.09	18.14	17.52	17.22	17.25	2982054	139044	152417	141380	142121	150993	133078	136261	141839	139536	130037	266598	242722	279717	288920
A0A8V1A0B4;A0A8V1A2L2	A0A8V1A0B4_CHICK;A0A8V1A2L2_CHICK	TJP1	Tight junction protein 1	Uniprot_Gallus-gallus(chicken)_Rev+Unrev51565sequences_Jan2024	104	;	;	;	-0.0293	-0.0586	-0.0293	0.869914	0.73773	0.719435	0.4321	0.389254	0.38325	17.48	17.4	17.31	17.5	17.6	17.48	17.63	17.32	17.32	17.38	17.12	17.27	17.25	17.29	17.93	17.34	17.31	2981787	182948	172986	162050	185295	199206	183147	203149	163347	163753	170952	142900	158329	155634	160278
A0A8V0ZZJ0	A0A8V0ZZJ0_CHICK	AHCY	Adenosylhomocysteinase	Uniprot_Gallus-gallus(chicken)_Rev+Unrev51565sequences_Jan2024	37				0.6981	1.1947	0.4966	0.582586	0.429488	0.0370718	0.33704	0.28267	0.0604466	16.59	16.94	17.17	16.51	16.67	17.29	16.91	17.44	17.67	17.05	16.86	16.34	16.36	16.44	19.83	17.19	17.18	2977348	98810.4	125872	147157	93584.3	104622	159837	122828	177414	208507	135670	119175	83123.9	84349.8	88949.3
A0A8V0Z2V6	A0A8V0Z2V6_CHICK	DBNL	Drebrin like	Uniprot_Gallus-gallus(chicken)_Rev+Unrev51565sequences_Jan2024	29				0.3193	0.9365	0.6172	0.712674	0.391786	0.0225821	0.381186	0.268008	0.0447349	16.84	16.85	17.13	16.54	16.91	17.42	17.36	17.3	17.24	17.97	17.09	16.75	16.58	16.79	19.38	17.28	17.23	2970493	117434	118213	143258	95274.5	123275	175176	168481	161121	155324	256324	139271	110020	98278.2	113142
A0A8V0ZV32;A0A8V0ZWD3	A0A8V0ZV32_CHICK;A0A8V0ZWD3_CHICK	GSS	Glutathione synthetase	Uniprot_Gallus-gallus(chicken)_Rev+Unrev51565sequences_Jan2024	37	;	;	;	0.9891	1.3661	0.3771	0.528286	0.442772	0.0910631	0.318065	0.287497	0.106503	16.55	16.94	17.13	16.15	16.81	17.18	16.73	17.25	17.44	16.94	16.62	16.04	16.16	16.28	20.07	17.07	17.07	2968728	95712.7	125645	143519	72832.3	114550	148890	108661	156158	178110	125392	100787	67221.5	73360.3	79426.3
A0A8V1A9J9;Q5ZLD5	A0A8V1A9J9_CHICK;Q5ZLD5_CHICK	WDR77;RCJMB04_6k8	Methylosome protein WDR77	Uniprot_Gallus-gallus(chicken)_Rev+Unrev51565sequences_Jan2024	18	;	;	;	0.507	0.3329	-0.1741	0.536068	0.662692	0.0150896	0.320854	0.364197	0.0351909	17.43	17.45	17.35	17.31	17.26	17.22	17.19	17.28	17.24	17.01	16.82	16.91	16.86	16.87	19.16	17.31	17.2	2966005	176609	179557	166691	162840	157458	152157	149092	158979	154874	132222	115365	123361	119077	119772
A0A8V1AK17	A0A8V1AK17_CHICK		Myosin motor domain-containing protein	Uniprot_Gallus-gallus(chicken)_Rev+Unrev51565sequences_Jan2024	45				0.7893	-0.0601	-0.8495	0.0718207	0.831042	0.001547	0.0916061	0.420158	0.0109318	17.86	17.59	17.34	17.94	17.61	16.81	17.18	16.78	16.76	16.57	17.58	17.98	17.88	17.91	16.04	17.29	17.26	2964229	237087	197036	166156	252239	199973	114724	148660	112680	110897	97153.1	196405	258284	241220	246156
F1P0T4	F1P0T4_CHICK	HNRNPLL	Heteroous nuclear ribonucleoprotein L like	Uniprot_Gallus-gallus(chicken)_Rev+Unrev51565sequences_Jan2024	36	nucleus	mRNA processing	RNA binding	-0.4848	-0.2675	0.2174	0.068077	0.276586	0.054458	0.0884604	0.216808	0.0771335	17.4	17.52	17.37	17.44	17.37	17.8	17.57	17.69	17.74	17.35	17.4	17.39	17.31	17.37	15.67	17.32	17.28	2949845	173334	188582	168847	177450	169249	227876	194177	211472	219392	167235	173346	172240	162173	169024
A0A8V0Y4G2;A0A8V0Y4H1;A0A8V0YAP2;P43233	A0A8V0Y4G2_CHICK;A0A8V0Y4H1_CHICK;A0A8V0YAP2_CHICK;CATB_CHICK	CTSB	Cathepsin B	Uniprot_Gallus-gallus(chicken)_Rev+Unrev51565sequences_Jan2024	13	;;;extracellular space,lysosome	;;;programmed cell death,regulation of catalytic activity,proteolysis involved in cellular protein catabolic process	;;;cysteine-type endopeptidase activity	0.7268	1.693	0.9662	0.482236	0.24602	0.0110507	0.301766	0.201244	0.0295165	16.54	16.24	16.45	16	16.61	17.51	16.81	17.74	16.99	17.49	17.14	16.89	17.07	17.1	19.68	17.21	17.11	2937214	95027.1	77142.7	89701.5	65391.9	100107	186346	114797	219260	129921	184645	144277	121269	137669	140370
A0A8V0XC14	A0A8V0XC14_CHICK	EPB41L3	Erythrocyte membrane protein band 4.1 like 3	Uniprot_Gallus-gallus(chicken)_Rev+Unrev51565sequences_Jan2024	84				0.4611	0.115	-0.3461	0.0576344	0.351131	0.115272	0.0797042	0.251163	0.124199	17.52	17.4	17.49	17.45	17.53	17.06	17.03	16.97	16.64	17.73	17.57	17.81	17.7	17.65	17.16	17.22	17.28	2935418	188191	172919	184601	179144	189508	136199	134249	128731	102366	217772	194290	230315	213253	206157
A0A8V0Z5X3;A0A8V0Z7I1;A0A8V0ZDD8;A0A8V0ZDG4;A0A8V0ZDG9;A0A8V0ZDH3	A0A8V0Z5X3_CHICK;A0A8V0Z7I1_CHICK;A0A8V0ZDD8_CHICK;A0A8V0ZDG4_CHICK;A0A8V0ZDG9_CHICK;A0A8V0ZDH3_CHICK	USP7	Ubiquitin carboxyl-terminal hydrolase 7	Uniprot_Gallus-gallus(chicken)_Rev+Unrev51565sequences_Jan2024	73	;;;;;	;;;;;	;;;;;	-0.1955	-0.2777	-0.0822	0.430685	0.252937	0.334747	0.283228	0.204913	0.244157	17.53	17.55	17.52	17.57	17.45	17.5	17.34	17.52	17.63	17.18	17.5	17.44	17.47	17.43	15.8	17.32	17.27	2933130	189182	192074	187545	194698	179367	184866	166220	188580	202291	148691	185087	177565	181348	176815
A0A8V0ZHI2	A0A8V0ZHI2_CHICK	RBMS1	RNA binding motif single stranded interacting protein 1	Uniprot_Gallus-gallus(chicken)_Rev+Unrev51565sequences_Jan2024	10				0.9337	0.8946	-0.0392	0.0470824	0.0513506	0.69986	0.0702008	0.074217	0.376825	16.91	16.94	17.03	17.28	17.17	17.03	17.15	17	16.78	17.18	17.64	17.71	17.73	17.72	18.71	17.12	17.17	2930909	123060	125824	133866	159203	147200	133760	145137	131085	112706	148011	204420	214710	217338	215460
A0A8V1ABW1;A0A8V1ABW8	A0A8V1ABW1_CHICK;A0A8V1ABW8_CHICK	ALDH2	Aldehyde dehydrogenase, mitochondrial;Aldehyde dehydrogenase, mitochondrial	Uniprot_Gallus-gallus(chicken)_Rev+Unrev51565sequences_Jan2024	34	;	;	;	1.0379	0.9841	-0.0538	0.238841	0.250373	0.871603	0.19736	0.203614	0.432587	17.5	16.9	16.86	17.14	16.53	16.54	16.62	17.78	16.56	16.91	17.01	17.55	17.5	17.29	19.3	17.22	17.2	2924159	185391	122090	118607	144668	94315.1	95565	100611	224449	96840.6	123271	131539	191827	185019	160695
E1C6T8	E1C6T8_CHICK	EIF3I	Eukaryotic translation initiation factor 3 subunit I	Uniprot_Gallus-gallus(chicken)_Rev+Unrev51565sequences_Jan2024	24				0.2996	0.0603	-0.2393	0.0703626	0.627328	0.0302963	0.090449	0.352323	0.0534438	17.46	17.58	17.36	17.54	17.39	17.32	17.25	17.36	17.3	16.87	17.24	17.43	17.53	17.49	17.87	17.07	17.11	2899614	179788	195661	168616	191085	171502	163638	155615	167756	160970	120121	154629	177032	189221	184544
A0A8V0Z3A2;A0A8V0Z3S6	A0A8V0Z3A2_CHICK;A0A8V0Z3S6_CHICK	PPIE	Peptidyl-prolyl cis-trans isomerase E	Uniprot_Gallus-gallus(chicken)_Rev+Unrev51565sequences_Jan2024	17	;	;	;	0.4542	0.8279	0.3737	0.604189	0.413166	0.0386152	0.344106	0.276384	0.0619547	16.91	16.97	17.09	16.88	16.96	17.18	17.14	17.23	17.35	17.7	16.86	16.89	16.78	16.87	19.33	17.14	17.16	2889880	123267	128199	139244	120323	127363	148232	144316	153475	167543	213593	118861	121605	112643	119757
B1PMA7	B1PMA7_CHICK	PEPD	Peptidase D	Uniprot_Gallus-gallus(chicken)_Rev+Unrev51565sequences_Jan2024	32				1.1454	1.5886	0.4432	0.503255	0.420763	0.0961616	0.309147	0.279393	0.110421	16.57	16.83	16.67	16.18	16.5	17.07	16.47	17.16	17.46	16.67	16.4	16.06	16.02	16.24	20.15	17.16	17.01	2883830	97338.1	116899	103988	74367.1	92825.9	137568	91005.3	146907	180588	103919	86616.6	68166.4	66447.5	77259.3
Q5ZKR8	Q5ZKR8_CHICK	RCJMB04_9i8	DNA replication licensing factor MCM6	Uniprot_Gallus-gallus(chicken)_Rev+Unrev51565sequences_Jan2024	59				-1.0158	-0.5629	0.4529	0.00441324	0.0802599	0.00475664	0.018434	0.0982583	0.0191327	17.26	17.48	17.55	17.26	17.21	17.79	17.62	17.89	18.05	17.67	17.12	16.97	17.09	17.06	14.34	17.26	17.23	2869107	156931	182740	192508	156462	151309	226016	200878	242125	271842	208853	142932	128633	139588	136704
A0A1D5NXL7	A0A1D5NXL7_CHICK	PSMD3	Proteasome 26S subunit, non-ATPase 3	Uniprot_Gallus-gallus(chicken)_Rev+Unrev51565sequences_Jan2024	41				0.1053	-0.347	-0.4522	0.635179	0.083211	0.00862925	0.355048	0.100601	0.0258949	17.7	17.71	17.56	17.58	17.57	17.21	17.15	17.32	17.42	16.66	17.37	17.43	17.48	17.48	16.36	17.33	17.24	2865455	212809	213902	193849	196179	194740	152078	145012	163706	175308	103206	169334	176384	183085	182366
A0A3Q2U596	A0A3Q2U596_CHICK	LMNB2	Lamin B2	Uniprot_Gallus-gallus(chicken)_Rev+Unrev51565sequences_Jan2024	45				1.0599	1.3117	0.2519	0.0402277	0.0254011	0.530817	0.0636248	0.0480291	0.318971	16.87	16.6	16.49	17	16.68	16.84	16.73	16.56	16.3	17.92	17.94	18.35	18.35	18.38	16.54	17.25	17.24	2865007	119722	99437.1	91781.9	130736	104970	117403	109004	96726.3	80631.4	247149	251037	334736	333828	342143
A0A182C5V6;A0A8V0YD00;A0A8V0YJC5;A0A8V0YJD0	A0A182C5V6_CHICK;A0A8V0YD00_CHICK;A0A8V0YJC5_CHICK;A0A8V0YJD0_CHICK	;LOC107049459;LOC107049459;LOC107049459	W-linked thioredoxin like 1;PITH domain-containing protein;PITH domain-containing protein;PITH domain-containing protein	Uniprot_Gallus-gallus(chicken)_Rev+Unrev51565sequences_Jan2024	9	;;;	;;;	;;;	-0.2014	0.0775	0.2788	0.543883	0.820769	0.122336	0.323605	0.41685	0.128906	17.12	17.42	17.48	17.05	17.16	17.69	17.23	17.47	17.88	17.31	17.27	16.82	16.86	17	18.2	17.23	17.23	2864152	142274	174928	182823	135263	146947	211301	153450	181260	241043	161961	158584	115805	118874	131509
A0A8V0XBM3;P23668	A0A8V0XBM3_CHICK;LEG6_CHICK	LGALS1B;	Galectin;16 kDa beta-galactoside-binding lectin	Uniprot_Gallus-gallus(chicken)_Rev+Unrev51565sequences_Jan2024	16	;	;	;carbohydrate binding	1.259	0.5295	-0.7295	0.204555	0.470827	0.0192699	0.179552	0.298024	0.0407404	17.6	16.99	17.68	17.09	17.29	16.44	16.9	16.24	15.95	17.24	17.04	17.11	17.3	17.3	19.22	17.39	16.98	2856279	198080	130587	210107	139849	160397	89028	122155	77167.4	63139.2	154535	134635	141403	161321	161202
A0A8V0YP17;P02314	A0A8V0YP17_CHICK;HMGN2_CHICK	HMGN4;HMGN2	Non-histone chromosomal protein HMG-17	Uniprot_Gallus-gallus(chicken)_Rev+Unrev51565sequences_Jan2024	3	;chromatin,nucleus	;	;nucleosomal DNA binding	0.3261	0.8792	0.5531	0.658862	0.338884	0.0260556	0.363005	0.245864	0.0487886	17.04	16.85	16.76	16.95	16.61	16.87	17.61	17.18	17.57	17.64	17.07	17.06	16.48	17.11	19.15	17.16	17.33	2855660	134731	118399	111050	126739	99685	119828	199398	148816	194161	204342	137261	136393	91172	140995
A0A3Q2U9U9	A0A3Q2U9U9_CHICK	OXSR1	Serine/threonine-protein kinase OSR1	Uniprot_Gallus-gallus(chicken)_Rev+Unrev51565sequences_Jan2024	23				-1.5533	-1.2908	0.2624	7.5952e-06	0.00138099	0.116757	0.00102975	0.0103199	0.125137	17.24	17.67	17.99	17.4	17.46	17.82	17.58	17.82	17.93	18	16.68	16.34	16.4	16.31	15.4	17.17	17.28	2854639	154860	207833	260924	173204	179851	231174	196592	231201	249556	263003	105211	82922.4	86702	81172.3
Q5ZLE6	EIF3H_CHICK	EIF3H	Eukaryotic translation initiation factor 3 subunit H	Uniprot_Gallus-gallus(chicken)_Rev+Unrev51565sequences_Jan2024	26	eukaryotic translation initiation factor 3 complex,eukaryotic translation initiation factor 3 complex, eIF3m	translational initiation	translation initiation factor activity	0.0585	-0.1402	-0.1988	0.815924	0.547944	0.0366962	0.415456	0.324857	0.0600896	17.52	17.53	17.37	17.55	17.49	17.28	17.45	17.38	17.31	17.01	17.34	17.61	17.66	17.57	16.05	17.17	17.17	2854097	187601	188861	169334	191997	183535	158875	178859	170733	161972	132304	165908	199521	207713	195088
Q5F3T2	Q5F3T2_CHICK	RCJMB04_7k22	Uncharacterized protein	Uniprot_Gallus-gallus(chicken)_Rev+Unrev51565sequences_Jan2024	42	stress fiber,microtubule,axoneme,septin complex,perinuclear region of cytoplasm,Requires Ontology,microtubule cytoskeleton,septin ring,cell division site,septin filament array	protein heterooligomerization,positive regulation of nonmotile primary cilium assembly,mitotic cytokinesis,cilium morphogenesis,septin ring assembly,cellular protein localization	GTP binding,cadherin binding,GTPase activity,protein complex scaffold	1.0242	1.0398	0.0156	0.00167427	0.00198997	0.827345	0.011384	0.0124811	0.419064	16.94	17.03	16.95	16.81	16.99	17.02	16.93	17.1	17	16.74	18.07	18.08	18.11	18.1	17.48	17.13	17.09	2850141	125621	133546	126827	114909	130442	132671	124799	140102	131226	109418	274748	276529	282679	281370
A0A1L1RPT1;A0A8V0YN64	A0A1L1RPT1_CHICK;A0A8V0YN64_CHICK	SMYD1	[histone H3]-lysine(4) N-trimethyltransferase	Uniprot_Gallus-gallus(chicken)_Rev+Unrev51565sequences_Jan2024	32	;	;	;	-1.0851	-1.228	-0.1429	0.00478732	0.00299558	0.127678	0.0191803	0.0152159	0.132536	17.72	17.82	17.76	17.58	17.72	17.8	17.43	17.58	17.65	17.4	16.85	16.71	16.86	16.72	13.14	17.38	17.18	2839419	215570	231929	221877	195835	215604	227979	176865	195758	205642	172671	118464	107295	118873	107732
Q5ZIT7	Q5ZIT7_CHICK	RCJMB04_23k2	AAA+ ATPase domain-containing protein	Uniprot_Gallus-gallus(chicken)_Rev+Unrev51565sequences_Jan2024	32	cytoplasmic mRNA processing body,proteasome regulatory particle, base subcomplex,nuclear proteasome complex,cytosolic proteasome complex	ER-associated ubiquitin-dependent protein catabolic process,modulation by host of viral transcription,positive regulation of RNA polymerase II transcriptional preinitiation complex assembly,positive regulation of proteasomal protein catabolic process	ATP binding,TBP-class protein binding,proteasome-activating ATPase activity,identical protein binding	-0.091	-0.3604	-0.2695	0.432714	0.0148775	0.000161302	0.283981	0.0349129	0.00381705	17.51	17.65	17.52	17.51	17.59	17.26	17.31	17.37	17.24	17.24	17.25	17.29	17.4	17.23	16.72	17.35	17.26	2837690	186324	205461	188069	186679	197189	157140	162561	169946	154895	154983	155902	160205	172997	153248
A0A8V0YM77;A0A8V0YTL9	A0A8V0YM77_CHICK;A0A8V0YTL9_CHICK	VRK1	VRK serine/threonine kinase 1	Uniprot_Gallus-gallus(chicken)_Rev+Unrev51565sequences_Jan2024	38	;	;	;	0.1073	0.0764	-0.0308	0.665825	0.73863	0.800386	0.365195	0.389546	0.410634	17.24	17.39	17.43	17.44	17.21	17.44	17.43	17.41	17.4	16.81	17.52	17.68	17.59	17.65	16.24	17.26	17.15	2827638	154824	171793	176790	177313	151796	177324	176626	173705	172494	114761	188010	209623	197439	205580
A0A3Q3A7P6	A0A3Q3A7P6_CHICK	RPS15A	Small ribosomal subunit protein uS8	Uniprot_Gallus-gallus(chicken)_Rev+Unrev51565sequences_Jan2024	14				-0.0229	-0.0696	-0.0466	0.939748	0.816678	0.354806	0.453295	0.415728	0.252826	17.38	17.33	17.52	17.45	17.35	17.39	17.46	17.28	17.33	17.32	17.58	17.66	17.66	17.47	15.11	17.12	17.17	2823543	170014	164190	187447	178996	166543	172128	179707	159567	164855	163345	195960	206726	206469	181778
A0A8V0XR62	A0A8V0XR62_CHICK	NOP56	Nucleolar protein 56	Uniprot_Gallus-gallus(chicken)_Rev+Unrev51565sequences_Jan2024	36				0.4241	0.1051	-0.319	0.269653	0.7441	0.0717084	0.213403	0.391538	0.0915131	17.34	17.32	17.18	17.71	17.43	17.15	17.44	17.07	17.02	16.63	17.66	17.89	17.77	17.72	15.42	17.35	17.25	2820273	165913	163079	148014	214717	176350	145459	177693	137953	133251	101529	206819	243016	223777	216268
A0A8V0Y380	A0A8V0Y380_CHICK	LAMB1	Laminin subunit beta 1	Uniprot_Gallus-gallus(chicken)_Rev+Unrev51565sequences_Jan2024	88				1.2136	1.0165	-0.1971	1.9465e-05	1.2966e-05	0.0149633	0.00148413	0.00130908	0.0350277	17.09	16.82	16.91	17.04	17.01	16.81	16.78	16.83	16.63	16.84	17.86	18.12	18.07	17.97	17.92	17.19	17.13	2804011	139122	115477	123358	134865	131825	114504	112554	116610	101151	117512	237706	285248	275931	256419
[truncated: 5,961 more rows]
[truncated: 6 more columns]

## Sheet: SAN v Ventricle
ProteinGroups	ProteinNames	Genes	ProteinDescriptions	Average Quantity Atria	Average Quantity Ventricle	Average Quantity SAN	SAN/Vent	SAN/Atria	Atria/Vent	Log2FC SAN/Vent
[truncated: 1,987 more rows]

[truncated: 3 more sheets: SAN v Atria, Atria v Ventricle, Transcript v Protein]
