# Supplementary material for: Biomechanical Isolation is Required for Maintenance of the Cardiac Pacemaker Cell Fate
Source: Research Square preprint supplement (doi:10.21203/rs.3.rs-9520289/v1), 2026-05-04
Supplement: Supplementary file 5 [file c43c6d153e116951a3d955de.xlsx]

## Sheet: SAN over Atria+Vent (BP)
Enrichment FDR	nGenes	Pathway Genes	Fold Enrichment	Pathway	URL	Genes
3.81e-07	31	452	3.62419	GO:0007409 axonogenesis	http://amigo.geneontology.org/amigo/term/GO:0007409	EFNB1 LAMA1 DBN1 PLXNA1 MAP1B NOTCH2 THY1 SEMA4B LAMA2 PLXNB3 PLXNA4 MAPT NGFR DCX GLI3 RND2 PTK7 STMN1 SPP1 FLRT3 CDH11 ITGB1 UCHL1 SHOX2 ALCAM C12orf57 CTTN NCAM1
3.81e-07	33	501	3.48067	GO:0061564 axon development	http://amigo.geneontology.org/amigo/term/GO:0061564	EFNB1 LAMA1 DBN1 PLXNA1 MAP1B NOTCH2 THY1 SEMA4B LAMA2 PLXNB3 PLXNA4 MAPT TNC NGFR DCX GLI3 RND2 PTK7 STMN1 SPP1 FLRT3 CDH11 ITGB1 UCHL1 SHOX2 ALCAM C12orf57 CTTN PTN NCAM1
8.71e-09	50	883	2.99224	GO:0097435 supramolecular fiber organization	http://amigo.geneontology.org/amigo/term/GO:0097435	VIM LIMA1 CTTN ASAP3 COTL1 MTPN RND2 DPYSL3 DBN1 STMN1 CALD1 MAP1B VILL TMOD3 FBLN5 TPM1 P3H4 TPM3 SERPINH1 MTSS1 SYNPO CSRP2 MYO6 TPM2 MARCKS AEBP1 PFDN1 CLU MAPT ELN PACSIN1 PSRC1 PDGFRA BIN1 CYP1B1 LUM ITGB1 TPPP3 HDGFL3 ANXA2 HMCN1 SFRP1 PDGFRB GPX1 COL12A1 COL14A1
8.46e-07	41	769	2.81737	GO:0030036 actin cytoskeleton organization	http://amigo.geneontology.org/amigo/term/GO:0030036	LIMA1 EPB41L3 CTTN ASAP3 COTL1 MTPN RND2 DPYSL3 DBN1 EHBP1 CALD1 VILL TMOD3 TPM1 TPM3 MTSS1 SYNPO CSRP2 MYO6 TPM2 MARCKS RALA MYH9 NOTCH2 ELN PACSIN1 PDGFRA FLNB BIN1 ITGB1 JAM3 CALR BCR PTK7 STMN1 HMCN1 SFRP1 PDGFRB FGD5
1.18e-06	40	753	2.80706	GO:0000904 cell morphogenesis involved in differentiation	http://amigo.geneontology.org/amigo/term/GO:0000904	EFNB1 LAMB1 LAMA1 DBN1 PLXNA1 MAP1B NOTCH2 THY1 SEMA4B LAMA2 PLXNB3 PLXNA4 ITGAV MAPT NGFR DCX MYH9 PTN GLI3 RND2 PTK7 STMN1 SPP1 FLRT3 FLNB CDH11 ITGB1 UCHL1 FZD7 SHOX2 ALCAM HEXA C12orf57 CALR P4HB CTTN NCAM1
3.81e-07	45	857	2.77472	GO:0030029 actin filament-based proc.	http://amigo.geneontology.org/amigo/term/GO:0030029	LIMA1 EPB41L3 CTTN ASAP3 COTL1 MTPN RND2 DPYSL3 DBN1 EHBP1 CALD1 VILL TMOD3 TPM1 TPM3 MTSS1 SYNPO CSRP2 MYO6 TPM2 MARCKS RALA MYH9 NOTCH2 ELN PACSIN1 PDGFRA FLNB BIN1 ITGB1 JAM3 CALR BCR EPDR1 PTK7 STMN1 HCN4 HMCN1 SFRP1 PDGFRB FGD5 MYL1 MYL6
3.81e-07	49	977	2.65026	GO:0030334 reg. of cell migration	http://amigo.geneontology.org/amigo/term/GO:0030334	PDGFRB PLXNA1 PRCP THY1 SEMA4B PLXNB3 PLXNA4 TNC DCN ATP2B4 MYLK HYAL2 LAMB1 LGMN CTSH SFRP1 ENG SMOC2 HYAL1 GLIPR2 PODXL PDGFRA ITGB1 MIA3 JAM3 MIF LAMA1 SRPX2 PTN DPYSL3 GNAI2 AKAP12 CYP1B1 ITGAV ACE BCR LAMA2 HMOX1 HSPA5 NGFR RECK TPM1 PTPRG PLPP3 S100A11 CALR DDRGK1 F10
4.69e-07	49	1001	2.58672	GO:0031175 neuron projection development	http://amigo.geneontology.org/amigo/term/GO:0031175	MAP4 EFNB1 LAMA1 DBN1 PLXNA1 STMN1 PACSIN1 MAP1B NOTCH2 MANF THY1 SEMA4B MAPT LAMA2 PLXNB3 PLXNA4 LAMB1 VIM TNC HSPA5 NGFR DCX SFRP1 PTN GLI3 RND2 PTK7 DPYSL3 SPP1 FLRT3 CDH11 PTPRG ITGB1 GFRA1 UCHL1 CTHRC1 CLMN HDGFL3 SHOX2 ALCAM GPC2 C12orf57 EPB41L3 CTTN NCS1 NCAM1
1.11e-06	49	1038	2.49451	GO:2000145 reg. of cell motility	http://amigo.geneontology.org/amigo/term/GO:2000145	PDGFRB PLXNA1 PRCP THY1 SEMA4B PLXNB3 PLXNA4 TNC DCN ATP2B4 MYLK HYAL2 LAMB1 LGMN CTSH SFRP1 ENG SMOC2 HYAL1 GLIPR2 PODXL PDGFRA ITGB1 MIA3 JAM3 MIF LAMA1 SRPX2 PTN DPYSL3 GNAI2 AKAP12 CYP1B1 ITGAV ACE BCR LAMA2 HMOX1 HSPA5 NGFR RECK TPM1 PTPRG PLPP3 S100A11 CALR DDRGK1 F10
7.17e-07	53	1150	2.43537	GO:0072359 circulatory system development	http://amigo.geneontology.org/amigo/term/GO:0072359	LAMA1 ENG PDGFRB RECK CALD1 GATA5 TBX3 PRCP ITGAV THY1 JAM3 ELN NOTCH2 DCN ATP2B4 HMOX1 MYH9 SMOC2 HYAL1 MTDH ALOX5 NGFR SRPX2 CTSH GLI3 PTK7 FLRT3 PDGFRA CYP1B1 TENM4 ITGB1 ACE PLPP3 DCHS1 ANPEP SHOX2 GAA CALR ANXA2 PLXNA4 GPX1 FZD7 STAB1 MYLK TBX18 TPM1 MIA3 FBN1 STIM1 SFRP1 BASP1 HCN4
1.18e-06	51	1109	2.43011	GO:0051270 reg. of cellular component movement	http://amigo.geneontology.org/amigo/term/GO:0051270	PDGFRB PLXNA1 PRCP THY1 SEMA4B PLXNB3 PLXNA4 TNC DCN ATP2B4 MYLK HYAL2 LAMB1 LGMN CTSH SFRP1 ENG SMOC2 HYAL1 GLIPR2 PODXL PDGFRA ITGB1 MIA3 JAM3 MIF LAMA1 SRPX2 PTN DPYSL3 GNAI2 AKAP12 BIN1 CYP1B1 ITGAV ACE BCR LAMA2 HMOX1 HSPA5 NGFR RECK HCN4 TPM1 PTPRG PLPP3 S100A11 CALR DDRGK1 F10
1.01e-06	55	1237	2.34953	GO:0048646 anatomical structure formation involved in morphogenesis	http://amigo.geneontology.org/amigo/term/GO:0048646	COL12A1 TBX18 PDGFRB RECK CALD1 PRCP ITGAV TMOD3 THY1 JAM3 CSRP2 DCN ATP2B4 HMOX1 MYH9 SMOC2 HYAL1 MTDH RALA ALOX5 DCX SRPX2 CTSH SFRP1 MTPN GLI3 ENG PTK7 PLXNA1 GATA5 PTGFRN NOTCH2 PDGFRA TBX3 CYP1B1 FBN2 TENM4 ITGB1 ACE CTHRC1 TAF10 ANPEP ANXA2 GPX1 LAMB1 NGFR STAB1 TPM1 MIA3 FZD7 DCHS1 STIM1 EPB41L3 PODXL
1.81e-08	71	1602	2.34198	GO:0016477 cell migration	http://amigo.geneontology.org/amigo/term/GO:0016477	GPC4 LAMB1 ENG RND2 PDGFRB PLXNA1 PODXL PRCP ITGB1 THY1 JAM3 SEMA4B PLXNB3 GPC2 PLXNA4 TNC DCN ATP2B4 MYLK HYAL2 DCX LGMN CTSH SFRP1 SMOC2 HYAL1 GLIPR2 PDGFRA MIA3 MIF ALOX5 HEXB LIMA1 CTTN ASAP3 EFNB1 LAMA1 SRPX2 PTN GLI3 DPYSL3 GNAI2 FLRT3 AKAP12 CYP1B1 ITGAV GFRA1 ACE FSTL1 CTHRC1 DCHS1 BCR LAMA2 GPX1 HMOX1 HSPA5 NGFR MYH9 PTK7 RECK TPM1 PTPRG PLPP3 S100A11 CALR DDRGK1 F10 MAP1B
8.71e-09	90	2254	2.10997	GO:0006928 movement of cell or subcellular component	http://amigo.geneontology.org/amigo/term/GO:0006928	GPC4 EFNB1 LAMB1 LAMA1 ENG RND2 PDGFRB PLXNA1 DYNLRB1 PODXL NOTCH2 PRCP ITGB1 THY1 JAM3 SEMA4B LAMA2 MYO6 PLXNB3 GPC2 PLXNA4 TNC BORCS7 DCN ATP2B4 MYLK HYAL2 DCX MYH9 LGMN SRPX2 CTSH SFRP1 SMOC2 HYAL1 GLIPR2 PDGFRA MIA3 MIF ALOX5 HEXB LIMA1 NGFR CTTN ASAP3 PTN GLI3 PTK7 DPYSL3 GNAI2 FLRT3 KTN1 AKAP12 MAP1B FLOT2 BIN1 CYP1B1 ITGAV GFRA1 UCHL1 ACE FSTL1 CTHRC1 DCHS1 ALCAM BCR GPX1 HMOX1 HSPA5 MAP4 …
4.69e-07	72	1806	2.1067	GO:0048870 cell motility	http://amigo.geneontology.org/amigo/term/GO:0048870	GPC4 LAMB1 ENG RND2 PDGFRB PLXNA1 PODXL PRCP ITGB1 THY1 JAM3 SEMA4B PLXNB3 GPC2 PLXNA4 TNC DCN ATP2B4 MYLK HYAL2 DCX LGMN SRPX2 CTSH SFRP1 SMOC2 HYAL1 GLIPR2 PDGFRA MIA3 MIF ALOX5 HEXB LIMA1 CTTN ASAP3 EFNB1 LAMA1 PTN GLI3 DPYSL3 GNAI2 FLRT3 AKAP12 CYP1B1 ITGAV GFRA1 ACE FSTL1 CTHRC1 DCHS1 BCR LAMA2 GPX1 HMOX1 HSPA5 NGFR MYH9 PTK7 RECK TPM1 PTPRG PLPP3 S100A11 CALR DDRGK1 F10 MAP1B
4.69e-07	72	1806	2.1067	GO:0051674 localization of cell	http://amigo.geneontology.org/amigo/term/GO:0051674	GPC4 LAMB1 ENG RND2 PDGFRB PLXNA1 PODXL PRCP ITGB1 THY1 JAM3 SEMA4B PLXNB3 GPC2 PLXNA4 TNC DCN ATP2B4 MYLK HYAL2 DCX LGMN SRPX2 CTSH SFRP1 SMOC2 HYAL1 GLIPR2 PDGFRA MIA3 MIF ALOX5 HEXB LIMA1 CTTN ASAP3 EFNB1 LAMA1 PTN GLI3 DPYSL3 GNAI2 FLRT3 AKAP12 CYP1B1 ITGAV GFRA1 ACE FSTL1 CTHRC1 DCHS1 BCR LAMA2 GPX1 HMOX1 HSPA5 NGFR MYH9 PTK7 RECK TPM1 PTPRG PLPP3 S100A11 CALR DDRGK1 F10 MAP1B
2.88e-10	111	2867	2.04589	GO:0009653 anatomical structure morphogenesis	http://amigo.geneontology.org/amigo/term/GO:0009653	EFNB1 LAMB1 LAMA1 ENG RND2 COL12A1 TBX18 PDGFRB DBN1 PLXNA1 RECK CALD1 PACSIN1 MAP1B NOTCH2 PDGFRA TBX3 PRCP ITGAV TMOD3 FBN2 CDH11 THY1 JAM3 FBN1 DCHS1 CSRP2 SEMA4B LAMA2 MYO6 PLXNB3 PLXNA4 ELN ITGB1 MAPT DCN ATP2B4 HMOX1 MYH9 SMOC2 HYAL1 CLU MTDH RALA ALOX5 TNC HSPA5 HEXB NGFR HYAL2 GPC4 DCX CTSZ SRPX2 CTSH SFRP1 MTPN PTN SSBP1 GLI3 NAGLU PTK7 SYF2 STMN1 SPP1 FLRT3 GATA5 PTGFRN FLNB CYP1B1 TENM…
3.81e-07	80	2086	2.02658	GO:0009888 tissue development	http://amigo.geneontology.org/amigo/term/GO:0009888	LAMB1 PCK2 LAMA1 ENG COL12A1 TBX18 GATA5 TBX3 CSRP2 TMEM119 SEMA4B LAMA2 MYO6 ITGB1 SFRP1 CSTA GLIPR2 MAP1B RALA ALOX5 VIM TNC ELN NGFR ATP2B1 GPC4 EFNB1 CTSZ CTSH PTN GLI3 PTK7 PDGFRB PLXNA1 SPP1 FLRT3 NOTCH2 PDGFRA FLNB CYP1B1 FBN2 CTSK TENM4 SERPINH1 FSTL1 CTHRC1 TAF10 DCHS1 SHOX2 GAA BNC2 BASP1 CALR DDRGK1 SELENOM PLXNA4 GPX1 MARCKS HYAL2 HNRNPH3 HYAL1 FZD7 MYLK PLOD1 MACROH2A2 ITGAV TPM1 LIN…
8.46e-07	76	1992	2.0161	GO:0040011 locomotion	http://amigo.geneontology.org/amigo/term/GO:0040011	GPC4 EFNB1 LAMB1 LAMA1 ENG RND2 PDGFRB PLXNA1 PODXL NOTCH2 PRCP ITGB1 THY1 JAM3 SEMA4B LAMA2 PLXNB3 GPC2 PLXNA4 TNC DCN ATP2B4 MYLK HYAL2 DCX LGMN SRPX2 CTSH SFRP1 SMOC2 HYAL1 GLIPR2 PDGFRA MIA3 MIF ALOX5 HEXB LIMA1 NGFR CTTN ASAP3 PTN GLI3 PTK7 DPYSL3 GNAI2 FLRT3 AKAP12 CYP1B1 ITGAV GFRA1 ACE FSTL1 CTHRC1 DCHS1 ALCAM BCR GPX1 HMOX1 HSPA5 MYH9 RECK TPM1 PTPRG PLPP3 S100A11 CALR DDRGK1 NCAM1 RALA …
3.28e-07	142	4617	1.62523	GO:0048731 system development	http://amigo.geneontology.org/amigo/term/GO:0048731	HSPA5 BASP1 MAP4 TPD52 GPC4 DCX EFNB1 PCK2 LAMA1 ENG PDGFRB DBN1 PLXNA1 STMN1 RECK CALD1 PACSIN1 GFER NCAN GATA5 MAP1B NOTCH2 PDGFRA TBX3 PRCP ITGAV MANF HAPLN1 TENM4 GFRA1 THY1 JAM3 PYGO1 SEMA4B MAPT LAMA2 MYO6 PLXNB3 PLXNA4 MARCKS ELN ITGB1 ACE DCN ATP2B4 LAMB1 HMOX1 MYH9 SRPX2 SFRP1 PTN SMOC2 HYAL1 CLU MTDH FBN1 CALR ANXA2 RALA ALOX5 VIM TNC HEXB SEC61A1 NGFR HYAL2 ATP2B1 SRSF5 CTSZ CTSH MTPN …

## Sheet: SAN over Atria+Vent (CC)
Enrichment FDR	nGenes	Pathway Genes	Fold Enrichment	Pathway	URL	Genes
1.53e-23	30	115	13.7851	GO:0043202 lysosomal lumen	http://amigo.geneontology.org/amigo/term/GO:0043202	HEXB HEXA PLD3 RNASET2 GPC4 EPDR1 PDGFRB PLBD2 GPC2 LAMP2 IDS DCN MAN2B2 CTSA LGMN GLA OGN NAGLU HYAL1 NPC2 NCAN GNS CTSV LUM GALNS CTSK GLB1 GAA SGSH
1.3e-23	38	207	9.70064	GO:0005775 vacuolar lumen	http://amigo.geneontology.org/amigo/term/GO:0005775	HEXB HEXA PLD3 RNASET2 GPC4 EPDR1 PDGFRB PLBD2 GAA GPC2 FUCA2 LAMP2 IDS DCN MAN2B2 AGA CTSA LGMN GLA OGN NAGLU CTSC HYAL1 NPC2 NCAN GNS CTSV GGH LUM GALNS CREG1 CTSK GLB1 DPP7 SGSH ANXA2 NHLRC3
5.36e-11	22	170	6.8385	GO:0005766 primary lysosome	http://amigo.geneontology.org/amigo/term/GO:0005766	HEXB STX7 SNAP23 HEXA FUCA2 LAMP2 RNASET2 AGA CTSA GLA CTSC NPC2 GNS PRCP GGH GALNS CREG1 GLB1 GAA DPP7 ANXA2 NHLRC3
5.36e-11	22	170	6.8385	GO:0042582 azurophil granule	http://amigo.geneontology.org/amigo/term/GO:0042582	HEXB STX7 SNAP23 HEXA FUCA2 LAMP2 RNASET2 AGA CTSA GLA CTSC NPC2 GNS PRCP GGH GALNS CREG1 GLB1 GAA DPP7 ANXA2 NHLRC3
2.35e-16	37	329	5.94282	GO:0005788 endoplasmic reticulum lumen	http://amigo.geneontology.org/amigo/term/GO:0005788	HSPA5 LRPAP1 SELENOM RNASET2 TXNDC12 CLU MANF CALR P4HA2 FKBP7 ERP29 MINPP1 COL12A1 F10 SUMF2 SERPINH1 PDIA4 PDIA3 PDIA2 P4HB COL14A1 FUCA2 TNC LAMB1 CTSZ CTSC QSOX1 SPP1 KTN1 CNPY3 ITIH2 MIA3 DBI COL26A1 FSTL1 ARSK FBN1
1.65e-13	39	453	4.54939	GO:0062023 collagen-containing extracellular matrix	http://amigo.geneontology.org/amigo/term/GO:0062023	DCN TNC ELN LAMB1 CTSZ LAMA1 SRPX SRPX2 CTSH SFRP1 AEBP1 OGN SOD3 CTSC COL12A1 CLU F13A1 MATN2 ANGPTL2 FBN2 LUM FBLN5 HMCN1 HAPLN1 SERPINH1 NCAM1 ITIH2 CSTB COL26A1 CTHRC1 FBN1 A2M ANXA2 COL14A1 LAMA2 SMOC2 GPC4 CALR GPC2
1.54e-10	31	368	4.45144	GO:0034774 secretory granule lumen	http://amigo.geneontology.org/amigo/term/GO:0034774	FUCA2 ALOX5 RNASET2 AGA HEXB CTSA CTSZ GLA COTL1 CTSH CTSC QSOX1 NPC2 CLU PRDX4 F13A1 GNS GGH GALNS CREG1 CDA CSTB S100A11 GLB1 A2M DPP7 ANXA2 NHLRC3 MIF
1.71e-11	42	602	3.68672	GO:0031012 extracellular matrix	http://amigo.geneontology.org/amigo/term/GO:0031012	DCN TNC ELN LAMB1 CTSZ LAMA1 SRPX SRPX2 CTSH SFRP1 AEBP1 OGN SOD3 CTSC COL12A1 CLU F13A1 MATN2 ANGPTL2 FBN2 LUM FBLN5 HMCN1 HAPLN1 SERPINH1 NCAM1 ITIH2 CSTB COL26A1 CTHRC1 FBN1 A2M ANXA2 COL14A1 LAMA2 PAPLN SMOC2 NCAN GPC4 CALR GPC2 FLRT3
1.71e-11	42	603	3.6806	GO:0030312 external encapsulating structure	http://amigo.geneontology.org/amigo/term/GO:0030312	DCN TNC ELN LAMB1 CTSZ LAMA1 SRPX SRPX2 CTSH SFRP1 AEBP1 OGN SOD3 CTSC COL12A1 CLU F13A1 MATN2 ANGPTL2 FBN2 LUM FBLN5 HMCN1 HAPLN1 SERPINH1 NCAM1 ITIH2 CSTB COL26A1 CTHRC1 FBN1 A2M ANXA2 COL14A1 LAMA2 PAPLN SMOC2 NCAN GPC4 CALR GPC2 FLRT3
1.15e-15	60	901	3.51895	GO:0000323 lytic vacuole	http://amigo.geneontology.org/amigo/term/GO:0000323	LAMP2 STX7 GNAI1 ATP6V1G1 PI4K2A ANPEP GAA FUCA2 MAN2B2 AGA HEXB EPDR1 CTSZ CTSH CTSC LAMTOR5 CTSV CTSK GLMP HEXA NPRL2 BORCS7 IDS RNASET2 HYAL2 SNAP23 PLD3 HYAL1 NPC2 ACE ARSK CHMP6 SGSH ANXA2 CTSA GPC4 LGMN GLA CPQ NAGLU PDGFRB GNS PRCP GGH GALNS PLBD2 GLB1 DPP7 CALR NAGA GPC2 DCN OGN CLTA NCAN LUM CREG1 NHLRC3 MYO6
1.15e-15	60	901	3.51895	GO:0005764 lysosome	http://amigo.geneontology.org/amigo/term/GO:0005764	LAMP2 STX7 GNAI1 ATP6V1G1 PI4K2A ANPEP GAA FUCA2 MAN2B2 AGA HEXB EPDR1 CTSZ CTSH CTSC LAMTOR5 CTSV CTSK GLMP HEXA NPRL2 BORCS7 IDS RNASET2 HYAL2 SNAP23 PLD3 HYAL1 NPC2 ACE ARSK CHMP6 SGSH ANXA2 CTSA GPC4 LGMN GLA CPQ NAGLU PDGFRB GNS PRCP GGH GALNS PLBD2 GLB1 DPP7 CALR NAGA GPC2 DCN OGN CLTA NCAN LUM CREG1 NHLRC3 MYO6
1.28e-14	62	1008	3.25026	GO:0005773 vacuole	http://amigo.geneontology.org/amigo/term/GO:0005773	LAMP2 STX7 GNAI1 ATP6V1G1 PI4K2A ANPEP GAA FUCA2 MAN2B2 AGA HEXB EPDR1 CTSZ CTSH CTSC NPRL2 LAMTOR5 CTSV GGH CTSK GLB1 GLMP HEXA BORCS7 IDS RNASET2 HYAL2 SNAP23 PLD3 HYAL1 NPC2 ACE ARSK CHMP6 SGSH ANXA2 CTSA GPC4 LGMN SRPX GLA CPQ NAGLU PDGFRB GNS PRCP GALNS PLBD2 DPP7 THBD CALR NAGA GPC2 DCN OGN CLTA NCAN LUM CREG1 NHLRC3 MYO6
9.04e-11	52	926	2.96742	GO:0070161 anchoring junction	http://amigo.geneontology.org/amigo/term/GO:0070161	RALA VIM TNC HSPA5 LIMA1 SLC9A3R2 CTTN SNAP23 ENG PTK7 PDGFRB AKAP12 FLOT2 FLNB ITGAV TMOD3 ITGB1 THY1 S100A11 PDIA3 ALCAM SNTB1 CSRP2 RPLP2 CALR ANXA2 P4HB MPZL1 SCARF2 MARCKS ASAP3 SMPX PDZD11 CDH11 HMCN1 LIN7C JAM3 DCHS1 EPB41L3 TNKS1BP1 NGFR MYH9 LAMA1 DBN1 FLRT3 MTDH SYNPO PODXL CADM1 PLPP3
1.53e-23	121	2316	2.76079	GO:0070062 extracellular exosome	http://amigo.geneontology.org/amigo/term/GO:0070062	FUCA2 LAMP2 RALA MAN2B2 VIM RNASET2 HSPA5 HEXB CTSA SLC9A3R2 ATP1B3 NUCB2 ATP2B1 GPC4 STX7 PLOD1 PEBP1 EFNB1 LAMB1 SNAP23 MYL6 MACROH2A2 MYH9 LGMN CTSZ GLA COTL1 CTSH FAH CPQ SFRP1 PDCD5 PLD3 SSBP1 AEBP1 OGN PTGR1 MINPP1 NAGLU SOD3 CTSC COL12A1 HGD GNAI2 HYAL1 PLXNA1 QSOX1 STMN1 SPP1 NPC2 CLU GLIPR2 PRDX4 PEPD SNRPD2 GNAI1 PODXL TXNDC17 NEDD8 RFTN1 FLOT2 GNS FLNB ANGPTL2 ALDOB ATP6V1G1 PRCP PI15 …
1.69e-23	121	2342	2.73014	GO:1903561 extracellular vesicle	http://amigo.geneontology.org/amigo/term/GO:1903561	FUCA2 LAMP2 RALA MAN2B2 VIM RNASET2 HSPA5 HEXB CTSA SLC9A3R2 ATP1B3 NUCB2 ATP2B1 GPC4 STX7 PLOD1 PEBP1 EFNB1 LAMB1 SNAP23 MYL6 MACROH2A2 MYH9 LGMN CTSZ GLA COTL1 CTSH FAH CPQ SFRP1 PDCD5 PLD3 SSBP1 AEBP1 OGN PTGR1 MINPP1 NAGLU SOD3 CTSC COL12A1 HGD GNAI2 HYAL1 PLXNA1 QSOX1 STMN1 SPP1 NPC2 CLU GLIPR2 PRDX4 PEPD SNRPD2 GNAI1 PODXL TXNDC17 NEDD8 RFTN1 FLOT2 GNS FLNB ANGPTL2 ALDOB ATP6V1G1 PRCP PI15 …
1.69e-23	121	2343	2.72898	GO:0043230 extracellular organelle	http://amigo.geneontology.org/amigo/term/GO:0043230	FUCA2 LAMP2 RALA MAN2B2 VIM RNASET2 HSPA5 HEXB CTSA SLC9A3R2 ATP1B3 NUCB2 ATP2B1 GPC4 STX7 PLOD1 PEBP1 EFNB1 LAMB1 SNAP23 MYL6 MACROH2A2 MYH9 LGMN CTSZ GLA COTL1 CTSH FAH CPQ SFRP1 PDCD5 PLD3 SSBP1 AEBP1 OGN PTGR1 MINPP1 NAGLU SOD3 CTSC COL12A1 HGD GNAI2 HYAL1 PLXNA1 QSOX1 STMN1 SPP1 NPC2 CLU GLIPR2 PRDX4 PEPD SNRPD2 GNAI1 PODXL TXNDC17 NEDD8 RFTN1 FLOT2 GNS FLNB ANGPTL2 ALDOB ATP6V1G1 PRCP PI15 …
1.69e-23	121	2343	2.72898	GO:0065010 extracellular membrane-bounded organelle	http://amigo.geneontology.org/amigo/term/GO:0065010	FUCA2 LAMP2 RALA MAN2B2 VIM RNASET2 HSPA5 HEXB CTSA SLC9A3R2 ATP1B3 NUCB2 ATP2B1 GPC4 STX7 PLOD1 PEBP1 EFNB1 LAMB1 SNAP23 MYL6 MACROH2A2 MYH9 LGMN CTSZ GLA COTL1 CTSH FAH CPQ SFRP1 PDCD5 PLD3 SSBP1 AEBP1 OGN PTGR1 MINPP1 NAGLU SOD3 CTSC COL12A1 HGD GNAI2 HYAL1 PLXNA1 QSOX1 STMN1 SPP1 NPC2 CLU GLIPR2 PRDX4 PEPD SNRPD2 GNAI1 PODXL TXNDC17 NEDD8 RFTN1 FLOT2 GNS FLNB ANGPTL2 ALDOB ATP6V1G1 PRCP PI15 …
2.25e-23	155	3577	2.28981	GO:0005615 extracellular space	http://amigo.geneontology.org/amigo/term/GO:0005615	FUCA2 LAMP2 RALA DCN ALOX5 MAN2B2 VIM RNASET2 TNC HSPA5 HEXB CTSA SLC9A3R2 ATP1B3 NUCB2 ATP2B1 GPC4 STX7 PLOD1 PEBP1 EFNB1 LAMB1 SNAP23 MYL6 MACROH2A2 MYH9 LGMN CTSZ GLA COTL1 CTSH FAH CPQ SFRP1 PDCD5 PLD3 SSBP1 AEBP1 OGN PTGR1 MINPP1 NAGLU SOD3 CTSC COL12A1 HGD GNAI2 HYAL1 PLXNA1 QSOX1 STMN1 SPP1 NPC2 CLU GLIPR2 PRDX4 PEPD F13A1 SNRPD2 GNAI1 PODXL TXNDC17 NEDD8 RFTN1 FLOT2 GNS FLNB ANGPTL2 ALDOB…
1.84e-23	183	4673	2.06939	GO:0005576 extracellular region	http://amigo.geneontology.org/amigo/term/GO:0005576	FUCA2 LAMP2 RALA DCN ALOX5 MAN2B2 VIM RNASET2 TNC HSPA5 HEXB CTSA SLC9A3R2 ATP1B3 NUCB2 ATP2B1 GPC4 STX7 PLOD1 PEBP1 EFNB1 LAMB1 SNAP23 MYL6 MACROH2A2 MYH9 LGMN CTSZ GLA COTL1 CTSH FAH CPQ SFRP1 PDCD5 PLD3 SSBP1 AEBP1 OGN PTGR1 MINPP1 NAGLU SOD3 CTSC COL12A1 HGD GNAI2 HYAL1 PLXNA1 QSOX1 STMN1 SPP1 NPC2 CLU GLIPR2 PRDX4 PEPD F13A1 SNRPD2 GNAI1 PODXL TXNDC17 NEDD8 RFTN1 FLOT2 GNS FLNB ANGPTL2 ALDOB…
5.18e-14	155	4466	1.834	GO:0031982 vesicle	http://amigo.geneontology.org/amigo/term/GO:0031982	FUCA2 LAMP2 RALA MAN2B2 VIM RNASET2 HSPA5 HEXB CTSA SLC9A3R2 ATP1B3 NUCB2 ATP2B1 GPC4 STX7 PLOD1 PEBP1 EFNB1 LAMB1 SNAP23 MYL6 MACROH2A2 MYH9 LGMN CTSZ GLA COTL1 CTSH FAH CPQ SFRP1 PDCD5 PLD3 SSBP1 AEBP1 OGN PTGR1 MINPP1 NAGLU SOD3 CTSC COL12A1 HGD GNAI2 HYAL1 PLXNA1 QSOX1 STMN1 SPP1 NPC2 CLU GLIPR2 PRDX4 PEPD SNRPD2 GNAI1 PODXL TXNDC17 NEDD8 RFTN1 FLOT2 GNS FLNB ANGPTL2 ALDOB ATP6V1G1 PRCP PI15 …

## Sheet: Atria+Vent over SAN (BP)
Enrichment FDR	nGenes	Pathway Genes	Fold Enrichment	Pathway	URL	Genes
0.00205816	8	77	7.59504	GO:0055013 cardiac muscle cell development	http://amigo.geneontology.org/amigo/term/GO:0055013	MYLK3 FHL2 PROX1 MYO18B CDK1 TTN ALPK2 PDLIM5
0.00183372	9	99	6.64566	GO:0006400 tRNA modification	http://amigo.geneontology.org/amigo/term/GO:0006400	DTWD1 PUS3 MOCS3 AARS2 TYW3 TRMT12 TRMT10C YRDC NSUN6
0.000453733	12	153	5.73351	GO:0008033 tRNA processing	http://amigo.geneontology.org/amigo/term/GO:0008033	DTWD1 PTCD1 PUS3 MOCS3 AARS2 TRPT1 TYW3 TRMT10C TRMT12 FARS2 YRDC NSUN6
0.000741033	13	192	4.94963	GO:0055001 muscle cell development	http://amigo.geneontology.org/amigo/term/GO:0055001	MYLK3 KLHL40 LMOD1 FHL2 PROX1 LDB3 MYO18B CDK1 MYOZ2 SMYD3 TTN ALPK2 PDLIM5
0.000173518	17	286	4.34524	GO:0051146 striated muscle cell differentiation	http://amigo.geneontology.org/amigo/term/GO:0051146	MYLK3 KLHL40 LMOD1 SMYD1 TANC1 FHL2 PROX1 LDB3 MYO18B CAPN2 CDK1 MYOZ2 SMYD3 TTN ALPK2 PDLIM5 NOS1
4.75e-05	26	566	3.35805	GO:1902532 negative reg. of intracellular signal transduction	http://amigo.geneontology.org/amigo/term/GO:1902532	DUSP3 KCTD10 FHL2 ARHGAP24 OTUD7B ENO1 FBLN1 DNAJA1 CDC34 PRKN MKRN2 HSPB1 FIGNL1 EMILIN1 DYRK3 CNKSR3 PBK MYOZ2 ATAD5 FNIP1 MAP2K3 KLHL31 DYRK2 CDT1 PKHD1 DUSP19
0.00134814	19	417	3.3308	GO:0140694 non-membrane-bounded organelle assembly	http://amigo.geneontology.org/amigo/term/GO:0140694	TRAF7 ERAL1 MYLK3 RPL10 LMOD1 CEP63 PRC1 AURKB CCDC61 POC1B PROX1 LDB3 CHMP7 ZFYVE1 MYOZ2 FASTKD2 CDK2 RPS3 TTN
0.000547408	37	1166	2.31971	GO:0070647 protein modification by small protein conjugation or removal	http://amigo.geneontology.org/amigo/term/GO:0070647	RNF14 MKRN2 UBA5 CDC34 KCTD10 RWDD3 MOCS3 TRIM54 CAND2 TRIM55 UBE2L6 KLHL40 UBE2Q1 USP38 MSL2 ARIH2 YOD1 UBE2G2 PRKN OTUD7B USP2 DNAJA1 FBXO9 TRAF7 TRIM47 ATG3 RPS3 RUSC1 SQSTM1 APPBP2 USP53 UBE2Z FEM1B FBXL22 NUB1 UVSSA CDK1
6.88e-05	50	1684	2.17049	GO:0006468 protein phosphorylation	http://amigo.geneontology.org/amigo/term/GO:0006468	MNAT1 PPM1F TTK CDK2 NRK DYRK2 DYRK3 CCNA2 PDK1 JAK1 DUSP19 PRKCB CDK1 RPS6KB2 PRKN STK38L AURKB MAP2K3 FBLN1 MAP3K20 EEF2K PROX1 OXSR1 MAP3K3 FNIP1 SRCIN1 TIE1 HSPB1 KLHL31 EMILIN1 MYLK3 SCYL1 MYLK4 TRPT1 ACSL1 CNKSR3 TTN SQSTM1 PBK MAP3K2 PLA2G6 SMYD3 ALPK2 SMTNL1 DNAJA1 NOS1 DUSP22 RPS3 DUSP3
4.88e-05	54	1857	2.12575	GO:1902531 reg. of intracellular signal transduction	http://amigo.geneontology.org/amigo/term/GO:1902531	NDRG4 DUSP3 KCTD10 DUSP22 FHL2 NRK ARHGAP24 ARHGAP18 FRMD1 FGA OTUD7B AURKB ENO1 FBLN1 DNAJA1 MAP3K20 CDC34 TRAF7 RPS3 FGB PRKN FNIP1 MAP2K3 LMCD1 MKRN2 HSPB1 SIPA1L2 PROX1 RAP1GAP2 FIGNL1 ARHGAP29 EMILIN1 MAPK8IP3 DYRK3 CNKSR3 PRKCB PBK MYOZ2 ATAD5 PLA2G6 MAP3K3 PTPMT1 FBXO9 KLHL31 DYRK2 SMYD2 SQSTM1 CDT1 FEM1B PKHD1 LCMT1 DUSP19 USP2
3.02e-14	122	4206	2.12042	GO:0043412 macromolecule modification	http://amigo.geneontology.org/amigo/term/GO:0043412	RNF14 MNAT1 MKRN2 UBA5 CDC34 PPM1F DTWD1 PUS3 KCTD10 PPM1H PPP2R5D TTK KDM3A SMYD1 NSUN4 EEF2KMT RWDD3 CDK2 NRK MOCS3 SIRT5 AARS2 DYRK2 DPH2 TRIM54 DYRK3 SMYD2 CAND2 CCNA2 TRIM55 ST8SIA6 PDK1 PTPRK PTPRD UBE2L6 KLHL40 UBE2Q1 JAK1 TYW3 DUSP19 RPUSD2 PRKCB USP38 CDK1 PDP2 MSL2 RPS6KB2 ARIH2 YOD1 TRMT12 UBE2G2 PRKN SMYD3 LCMT1 STK38L NSUN6 OTUD7B AURKB MAP2K3 USP2 KDM4A FBLN1 DNAJA1 MAP3K20 ATG4A EE…
6.88e-05	56	1994	2.05302	GO:0016310 phosphorylation	http://amigo.geneontology.org/amigo/term/GO:0016310	MNAT1 TIE1 ENO1 PPM1F ENO3 TTK CDK2 NRK DYRK2 DYRK3 CCNA2 PDK1 PFKM AK5 JAK1 DUSP19 PRKCB CDK1 RPS6KB2 PRKN STK38L AURKB MAP2K3 FBLN1 MAP3K20 EEF2K PROX1 OXSR1 MAP3K3 FNIP1 SRCIN1 HSPB1 KLHL31 EMILIN1 MYLK3 SCYL1 MYLK4 TRPT1 ACSL1 CNKSR3 TTN DCK SQSTM1 PBK MAP3K2 PLA2G6 SMYD3 TPK1 ALPK2 SMTNL1 DNAJA1 NOS1 DUSP22 RPS3 DUSP3
5.43e-11	109	3932	2.02649	GO:0006464 cellular protein modification proc.	http://amigo.geneontology.org/amigo/term/GO:0006464	RNF14 MNAT1 MKRN2 UBA5 CDC34 PPM1F KCTD10 PPM1H PPP2R5D TTK KDM3A SMYD1 EEF2KMT RWDD3 CDK2 NRK MOCS3 SIRT5 DYRK2 DPH2 TRIM54 DYRK3 SMYD2 CAND2 CCNA2 TRIM55 ST8SIA6 PDK1 PTPRK PTPRD UBE2L6 KLHL40 UBE2Q1 JAK1 DUSP19 PRKCB USP38 CDK1 PDP2 MSL2 RPS6KB2 ARIH2 YOD1 UBE2G2 PRKN SMYD3 LCMT1 STK38L OTUD7B AURKB MAP2K3 USP2 KDM4A FBLN1 DNAJA1 MAP3K20 ATG4A EEF2K DUSP3 FBXO9 DUSP22 PROX1 TRAF7 TRIM47 ATG3 R…
0.00150838	44	1594	2.01788	GO:0007010 cytoskeleton organization	http://amigo.geneontology.org/amigo/term/GO:0007010	PKP2 EPB41L4B LDB3 NRK MACF1 MYLK3 ARHGAP18 TBCEL PDLIM5 LMOD1 CORO6 AURKB CEP63 SMTNL2 PRC1 SMTNL1 PPM1F CCDC61 POC1B PRKN MAP3K20 ABLIM1 NUBP1 TJP1 CAP2 PROX1 CNTRL RAN FIGNL1 TRIM54 CHMP7 CAPN2 PKHD1 MYOZ2 ABLIM3 CTNNA3 CEP68 CDK2 RPS3 TTN SORBS1 TTK CDK1
5.43e-11	109	3952	2.01623	GO:0036211 protein modification proc.	http://amigo.geneontology.org/amigo/term/GO:0036211	RNF14 MNAT1 MKRN2 UBA5 CDC34 PPM1F KCTD10 PPM1H PPP2R5D TTK KDM3A SMYD1 EEF2KMT RWDD3 CDK2 NRK MOCS3 SIRT5 DYRK2 DPH2 TRIM54 DYRK3 SMYD2 CAND2 CCNA2 TRIM55 ST8SIA6 PDK1 PTPRK PTPRD UBE2L6 KLHL40 UBE2Q1 JAK1 DUSP19 PRKCB USP38 CDK1 PDP2 MSL2 RPS6KB2 ARIH2 YOD1 UBE2G2 PRKN SMYD3 LCMT1 STK38L OTUD7B AURKB MAP2K3 USP2 KDM4A FBLN1 DNAJA1 MAP3K20 ATG4A EEF2K DUSP3 FBXO9 DUSP22 PROX1 TRAF7 TRIM47 ATG3 R…
1.51e-06	77	2847	1.97712	GO:0035556 intracellular signal transduction	http://amigo.geneontology.org/amigo/term/GO:0035556	MAP2K3 NOS1 NDRG4 DUSP3 KCTD10 CAP2 DUSP22 TTK FHL2 NRK ARHGAP24 TUFT1 ARHGAP18 FRMD1 JAK1 PRKCB CDT1 CDK1 FGA RPS6KB2 SH2B1 STK38L MYZAP OTUD7B AURKB ENO1 FBLN1 DNAJA1 MAP3K20 CDC34 PPM1F DYRK2 PLVAP TRAF7 RPS3 FGB OXSR1 PRKN MAP3K3 FNIP1 LMCD1 MKRN2 HSPB1 SIPA1L2 PROX1 DEPDC7 RAP1GAP2 FIGNL1 ARHGAP29 EMILIN1 MAPK8IP3 DYRK3 CNKSR3 PBK MAP3K2 MYOZ2 ATAD5 PLA2G6 CDK2 CCNA2 PTPMT1 MYOM1 FBXO9 KLHL3…
1.28e-06	81	3030	1.95422	GO:0006793 phosphorus metabolic proc.	http://amigo.geneontology.org/amigo/term/GO:0006793	MNAT1 TIE1 ENO1 NOS1 PPM1F GNPNAT1 ABHD12 ENO3 PPM1H PPP2R5D TTK CDK2 NRK DYRK2 ENTPD1 DYRK3 THNSL2 CCNA2 ACSL1 PDK1 PFKM PTPRK PTPRD AK5 JAK1 DUSP19 PRKCB RRM1 CDK1 PDP2 NADSYN1 RPS6KB2 PLA2G6 PRKN TPK1 ACOT6 STK38L AURKB MAP2K3 ACAT1 FBLN1 MAP3K20 EEF2K DUSP3 DUSP22 PROX1 MOCS3 RAN DCK OXSR1 SULT1B1 MAP3K3 FNIP1 SRCIN1 HSPB1 PTPMT1 RNGTT KLHL31 EMILIN1 MYLK3 SCYL1 MYLK4 TRPT1 CNKSR3 TTN SQSTM1 …
1.51e-06	80	3005	1.94615	GO:0006796 phosphate-containing compound metabolic proc.	http://amigo.geneontology.org/amigo/term/GO:0006796	MNAT1 TIE1 ENO1 NOS1 PPM1F ABHD12 ENO3 PPM1H PPP2R5D TTK CDK2 NRK DYRK2 ENTPD1 DYRK3 THNSL2 CCNA2 ACSL1 PDK1 PFKM PTPRK PTPRD AK5 JAK1 DUSP19 PRKCB RRM1 CDK1 PDP2 NADSYN1 RPS6KB2 PLA2G6 PRKN TPK1 ACOT6 STK38L AURKB MAP2K3 ACAT1 FBLN1 MAP3K20 EEF2K DUSP3 DUSP22 PROX1 MOCS3 RAN DCK OXSR1 SULT1B1 MAP3K3 FNIP1 SRCIN1 HSPB1 PTPMT1 RNGTT KLHL31 EMILIN1 MYLK3 SCYL1 MYLK4 TRPT1 CNKSR3 TTN SQSTM1 CAPN2 PB…
0.00145253	80	3630	1.61107	GO:0044085 cellular component biogenesis	http://amigo.geneontology.org/amigo/term/GO:0044085	TSR3 PKP2 SAR1A ABLIM1 ARVCF NUBP1 FOXRED1 ZNHIT6 NSUN4 MACF1 TRAF7 RAN ERAL1 NDUFAF1 ARHGAP24 POC1B MYLK3 CAND2 ATG3 ARHGAP18 RPL10 NUBPL TBCEL NDUFAF6 LMOD1 ABCE1 RPUSD2 PLEKHA7 CDT1 FGA ABLIM3 CEP63 PLA2G6 PRC1 PTGES3L CHMP7 AURKB PPM1F CCDC61 DUSP22 CDK2 PTPRD FGB PACS2 PRKN FNIP1 NTN1 TIE1 CDC34 MTG2 EEF2K TJP1 KCTD10 PROX1 FASTKD2 LDB3 ATXN10 EMILIN1 RPS3 ZFYVE1 RRM1 CDK1 PKHD1 MYOZ2 SH2B1 …
0.0011607	90	4206	1.56424	GO:0006996 organelle organization	http://amigo.geneontology.org/amigo/term/GO:0006996	ABLIM3 ARIH2 PKP2 KDM4A SAR1A EPB41L4B ABLIM1 TRIP11 TIMM44 FOXRED1 TTK TRAK2 LDB3 NRK MGME1 MACF1 TRAF7 CLUH ERAL1 NDUFAF1 POC1B MYLK3 DYM DYRK3 ATG3 ARHGAP18 RPL10 CHMP7 NUBPL TBCEL NDUFAF6 SQSTM1 PDLIM5 LMOD1 GFM2 CORO6 AURKB CEP63 PRKN SMTNL2 PRC1 SMTNL1 MNAT1 PPM1F CCDC61 CDK2 MTHFR PACS2 MAP3K20 NUBP1 TJP1 CAP2 KDM3A SMYD1 PROX1 CNTRL ATXN10 RAN FIGNL1 TBC1D4 TRIM54 SMYD2 HIKESHI PTPRD CAPN…

## Sheet: Atria+Vent over SAN (CC)
Enrichment FDR	nGenes	Pathway Genes	Fold Enrichment	Pathway	URL	Genes
0.0133457	2	3	48.7348	GO:0005863 striated muscle myosin thick filament	http://amigo.geneontology.org/amigo/term/GO:0005863	MYBPC3 MYOM1
0.000624766	5	25	14.6204	GO:0031430 M band	http://amigo.geneontology.org/amigo/term/GO:0031430	MYOM1 SMTNL2 SMTNL1 TTN ENO1
0.000149182	6	31	14.1488	GO:0031941 filamentous actin	http://amigo.geneontology.org/amigo/term/GO:0031941	LDB3 PDLIM5 SMTNL2 SMTNL1 DUSP22 MYO18B
5.61e-05	7	40	12.7929	GO:0031672 A band	http://amigo.geneontology.org/amigo/term/GO:0031672	MYOM1 KLHL40 SMTNL2 SMTNL1 MYBPC3 TTN ENO1
0.0133457	4	28	10.4432	GO:0036379 myofilament	http://amigo.geneontology.org/amigo/term/GO:0036379	LMOD1 MYBPC3 TTN MYOM1
1.37e-05	13	155	6.13116	GO:0031674 I band	http://amigo.geneontology.org/amigo/term/GO:0031674	FHL2 LDB3 KLHL40 PDLIM5 MYOZ2 SMTNL2 SMTNL1 MYZAP TTN HSPB1 MYO18B TRIM54 FBXL22
6.87e-08	19	229	6.06525	GO:0030017 sarcomere	http://amigo.geneontology.org/amigo/term/GO:0030017	MYOM1 FHL2 LDB3 KLHL40 PDLIM5 LMOD1 MYOZ2 SMTNL2 SMTNL1 MYZAP PYROXD1 MYBPC3 TTN ENO1 HSPB1 MYO18B TRIM54 SQSTM1 FBXL22
6.87e-08	20	250	5.84818	GO:0030016 myofibril	http://amigo.geneontology.org/amigo/term/GO:0030016	MYOM1 FHL2 LDB3 KLHL40 PDLIM5 LMOD1 MYOZ2 SMTNL2 SMTNL1 MYZAP PYROXD1 MYBPC3 TTN ENO1 HSPB1 MYO18B TRIM54 SQSTM1 FBXL22 MYBPC1
6.87e-08	20	260	5.62325	GO:0043292 contractile fiber	http://amigo.geneontology.org/amigo/term/GO:0043292	MYOM1 FHL2 LDB3 KLHL40 PDLIM5 LMOD1 MYOZ2 SMTNL2 SMTNL1 MYZAP PYROXD1 MYBPC3 TTN ENO1 HSPB1 MYO18B TRIM54 SQSTM1 FBXL22 MYBPC1
0.000708003	10	141	5.18456	GO:0030018 Z disc	http://amigo.geneontology.org/amigo/term/GO:0030018	FHL2 LDB3 PDLIM5 MYOZ2 TTN HSPB1 MYO18B TRIM54 FBXL22 MYZAP
0.000111104	13	190	5.00173	GO:0005912 adherens junction	http://amigo.geneontology.org/amigo/term/GO:0005912	PDLIM5 PKP2 ARVCF LDB3 PLEKHA7 SCRIB CTNNA3 SORBS1 TJP1 ARHGAP24 PTPRK
1.23e-06	26	520	3.65511	GO:0005759 mitochondrial matrix	http://amigo.geneontology.org/amigo/term/GO:0005759	PTCD1 NSUN4 FASTKD2 ERAL1 MRPL30 MTG2 TIMM44 SIRT5 RPS3 CDK1 TRMT10C TUFM ACAT1 IDH3B ACOT13 NDUFAF1 FARS2 PDK1 PDP2 PPTC7 ALDH6A1 ALDH1L2 NUBPL ABCE1 GFM2 GSTK1
6.65e-06	25	532	3.43526	GO:0015629 actin cytoskeleton	http://amigo.geneontology.org/amigo/term/GO:0015629	ABLIM1 LDB3 MACF1 MYLK3 PDLIM5 LMOD1 MYOZ2 ABLIM3 SMTNL2 SMTNL1 SRCIN1 NTN1 DUSP22 MYO18B TTN TJP1 AFAP1L1 PRKCB STK38L MYZAP SORBS1 CAPN2 IPP
9.8e-09	62	1830	2.47669	GO:0005739 mitochondrion	http://amigo.geneontology.org/amigo/term/GO:0005739	TUFM ACAT1 UNG MTG2 IDH3B TIMM44 LIG1 PTCD1 PTPMT1 TRAK2 NSUN4 FASTKD2 ALDH6A1 SIRT5 AARS2 MGME1 RTN4IP1 ERAL1 COQ10A AFG1L NDUFAF1 FARS2 NUBPL PDK1 DCK NDUFAF6 PDP2 TRMT10C PLA2G6 MRPL30 PPTC7 GSTK1 NOA1 VWA8 FOXRED1 ALDH1L2 RPS3 ACSL1 ABCE1 ZFYVE1 CDK1 PACS2 PRKN YRDC GPN1 CISD3 DNAJA1 PHYH ACOT13 HEMK1 MTUS1 ASS1 SQSTM1 CAPN2 GFM2 RRM1 MLXIP NOS1 NDRG4
0.000261524	35	1136	2.25227	GO:0099081 supramolecular polymer	http://amigo.geneontology.org/amigo/term/GO:0099081	PKP2 MYOM1 FHL2 LDB3 MACF1 KIF21A KLHL40 PDLIM5 LMOD1 MYOZ2 AURKB SMTNL2 SMTNL1 MYZAP FBLN1 DUSP22 PYROXD1 MYBPC3 ARHGAP18 CHMP7 TTN CDK1 APPBP2 ENO1 HSPB1 MTUS1 MYO18B TRIM54 RUSC1 SQSTM1 COL4A5 MYBPC1 FBXL22 PRC1 TRIM55
0.000479136	34	1127	2.20539	GO:0099512 supramolecular fiber	http://amigo.geneontology.org/amigo/term/GO:0099512	PKP2 MYOM1 FHL2 LDB3 MACF1 KIF21A KLHL40 PDLIM5 LMOD1 MYOZ2 AURKB SMTNL2 SMTNL1 MYZAP FBLN1 DUSP22 PYROXD1 MYBPC3 ARHGAP18 CHMP7 TTN CDK1 APPBP2 ENO1 HSPB1 MTUS1 MYO18B TRIM54 RUSC1 SQSTM1 MYBPC1 FBXL22 PRC1 TRIM55
0.000261524	41	1441	2.07994	GO:0015630 microtubule cytoskeleton	http://amigo.geneontology.org/amigo/term/GO:0015630	CCDC61 CEP85L TTK CNTRL MACF1 KIF21A POC1B POC5 AURKB CEP63 SMTNL2 PRC1 SMTNL1 CEP68 DNAJA1 SORBS1 CDK2 MTUS1 RAN RAP1GAP2 ARL8B DYRK3 ARL8A ARHGAP18 CHMP7 RPS3 AK5 PLEKHA7 CDK1 PKHD1 PLA2G6 USP2 APPBP2 NUBP1 HSPB1 ACOT13 TRIM54 SCYL1 RUSC1 CCDC141 TRIM55
1.44e-07	72	2553	2.06164	GO:0005856 cytoskeleton	http://amigo.geneontology.org/amigo/term/GO:0005856	PKP2 EPB41L4B ABLIM1 CCDC61 CEP85L TTK CNTRL LDB3 DYRK2 MACF1 KIF21A POC1B MYLK3 DYRK3 POC5 PDLIM5 LMOD1 MYOZ2 ABLIM3 AURKB CEP63 SMTNL2 PRC1 SMTNL1 SRCIN1 CEP68 NTN1 DNAJA1 SORBS1 DUSP22 CDK2 MTUS1 RAN RAP1GAP2 MYO18B ARL8B ARL8A ARHGAP18 CHMP7 RPS3 AK5 TTN PLEKHA7 CDK1 PKHD1 PLA2G6 USP2 APPBP2 TRIP11 NUBP1 TJP1 HSPB1 ACOT13 TRIM54 ARHGAP24 SCYL1 FRMD1 TBCEL AFAP1L1 RUSC1 JAK1 CCDC141 PRKCB CTNN…
0.0133457	25	888	2.05806	GO:0005815 microtubule organizing center	http://amigo.geneontology.org/amigo/term/GO:0005815	CCDC61 CEP85L CNTRL POC1B POC5 AURKB CEP63 SMTNL2 SMTNL1 CEP68 SORBS1 CDK2 RAN RAP1GAP2 DYRK3 AK5 PLEKHA7 CDK1 PKHD1 PLA2G6 USP2 NUBP1 MTUS1 SCYL1 CCDC141
0.000667849	41	1513	1.98096	GO:0099080 supramolecular complex	http://amigo.geneontology.org/amigo/term/GO:0099080	PKP2 MYOM1 TTK FHL2 FASTKD2 LDB3 MACF1 KIF21A KLHL40 PDLIM5 LMOD1 MYOZ2 AURKB SMTNL2 SMTNL1 MYZAP FBLN1 DUSP22 PYROXD1 MYBPC3 DYRK3 ARHGAP18 CHMP7 TTN SQSTM1 CDT1 CDK1 MCC PSMA4 APPBP2 ENO1 HSPB1 MTUS1 MYO18B TRIM54 RUSC1 COL4A5 MYBPC1 FBXL22 PRC1 TRIM55
