# Supplementary material for: Biomechanical Isolation is Required for Maintenance of the Cardiac Pacemaker Cell Fate
Source: Research Square preprint supplement (doi:10.21203/rs.3.rs-9520289/v1), 2026-05-04
Supplement: Supplementary file 6 [file ec1760d996705872fbebcc61.xlsx]

## Sheet: SAN_CN03_v_Veh_Upstream_Anal
Upstream Regulator	Expr Log Ratio	Molecule Type	Predicted Activation State	Activation z-score	p-value of overlap	Target Molecules in Dataset	Mechanistic Network
YAP1	0.126	transcription regulator	Activated	5.543	2.43e-17	ACAN,ACSF2,ACSS2,ACTA2,ADAM8,ADCY7,ALDH1A2,AMOTL2,ANGPTL4,ANK1,ANKRD1,ANKRD52,AREG,ARHGEF6,ASNS,ATF3,BIN1,BMPR1B,CCN1,CCN2,CCN5,CCR7,CD109,CD36,CD44,CD74,CDK6,CDKN1A,CFLAR,CIT,CLDN1,COL11A1,COL6A1,COL9A1,COL9A3,CORIN,CPXM2,CRIM1,CSF1,CTHRC1,CTSD,DCN,DDAH1,DIAPH2,DUSP4,E2F7,ECHDC1,EDN1,EGR1,EGR2,EOMES,ERC1,F13A1,FAS,FGF1,FLNB,FMOD,FN1,FOS,FST,FTL,GDF15,GLRX,GM2A,GPRC5A,GSN,HBEGF,HMGCR,ID1,ID2,IFI3…	977 (20)
NUPR1		transcription regulator	Activated	5.359	1.24e-08	ACTA2,AEN,ANK1,AREG,ARHGEF26,ARMC7,AS3MT,ASIC1,ATF3,AVPI1,B3GNT5,BNIP3,BRINP3,BTG1,CACNA2D2,CASTOR2,CCN1,CEBPB,CEP170B,CEP97,CERK,CREB5,CYSTM1,DENND5B,DNMT3B,DUSP5,DUSP8,ELMOD1,ENO2,EXTL2,FGF1,FHL2,FZD8,GDF15,GSTA4,HBEGF,HCN1,HOXB5,HSPA2,IGF1R,IL6R,ING2,ITPR3,KLF4,KLF6,LHFPL2,LIF,LRP8,MAGI1,MAN2B2,MYC,MYD88,NAAA,NGFR,NRROS,NT5DC3,NUP50,OSER1,P4HA2,PARP9,PCTP,PFKFB3,PHLDA1,PIM1,PLK3,PPFIBP2,PRAG1,…	776 (13)
MRTFA	0.963	transcription regulator	Activated	4.623	8.11e-16	ACTA2,ACTB,ACTC1,ACTG2,AMOTL2,ANKRD1,ARPC1B,CCN1,CCN2,CCN5,CD44,CLDN15,CNN2,CYFIP2,DDAH1,DNAJB4,EDN1,EFNA5,EGR1,EGR2,EGR3,EPCAM,EYA2,FABP3,FN1,FOS,FSCN2,G0S2,ID1,ITGA11,ITGA2,ITGA5,ITGA6,ITGAV,LOXL3,MAFK,MMP9,MOGAT2,MPL,MYH9,MYLK,NPPA,OSCP1,PRSS57,RUNX1,SCARB1,SELP,SERPINB2,SLC1A2,SLC20A1,SLC7A11,SORBS1,SULT1E1,SYNPO2,TAGLN,TBXAS1,TGFB2,THBS1,TNC,VCL,WNT5A,WTIP,ZFPM1	826 (25)
SRF	0.806	transcription regulator	Activated	4.192	2.68e-20	ABRA,ACTA2,ACTB,ACTC1,ACTG2,ACTN1,ANKRD1,ANKRD6,ARC,ATF3,BICC1,CALB1,CAP1,CCM2,CCN2,CDKN1A,CLDN1,CLDN15,CNN2,CORIN,CSRP1,CSRP2,CTHRC1,CTXN2,CYBB,DES,DUSP5,EGR1,EGR2,EGR3,EGR4,EXTL2,EYA2,FABP5,FGF1,FGF12,FHL2,FOS,FST,G0S2,GATA4,GSN,IL15,IL6,ITGA6,ITGA9,JUN,JUND,LATS2,LBH,LDB3,LEPR,LIF,LMCD1,LMOD1,LRP4,MCF2L,MGAT4A,MMP9,MOGAT2,MPL,MYB,MYH7,MYH9,MYL4,MYLK,MYO1E,MYOD1,NKX2-5,NOX4,NPPA,NR4A1,NR4A2,OSC…	920 (22)
CREB1	-0.131	transcription regulator	Activated	3.983	4.82e-16	ACHE,AQP11,ARC,ATF3,ATP1A1,BAG3,BDNF,BNIP3,CA10,CADPS2,CALCA,CCN1,CDA,CDH10,CDH13,CDH8,CDKN1A,CEBPB,CHGA,CHGB,COCH,COL24A1,CRIM1,CRYM,CSRP2,CYFIP2,DCX,DMBT1,DUSP1,ECEL1,ECM1,EDIL3,EDN1,EGR1,EGR2,EGR4,ENTPD1,ERRFI1,FAM3B,FGF13,FGF19,FGL2,FN1,FOS,GAA,GABRA5,GADD45B,GAP43,GRIA3,HAS2,HMGA2,HMGCR,HOMER1,HTR2A,HTR2C,ID1,IGSF10,IL2RA,IL6,INA,INHBA,JUN,KCNC4,KLF4,KLF5,LAPTM4B,LMO3,LYPD6,MCTP1,MEST,MFSD2A…	854 (19)
MRTFB	-0.01	transcription regulator	Activated	3.578	1.68e-16	ACTA2,ACTB,ACTG2,AK5,AMOTL2,ANKRD1,ARID5B,CCN1,CCN2,CLDN15,CNN2,CRIM1,DDAH1,DNAJB4,EDN1,EDNRA,EFNA5,EGR1,EGR2,EGR3,EYA2,FN1,G0S2,ID1,IGFBP5,INHBA,ITGA11,ITGA2,ITGA5,ITGA6,ITGAV,LOXL3,MAFK,MOGAT2,MPL,MPP4,MYH9,NUAK1,OSCP1,PRSS57,PTPRO,RUNX1,SCARB1,SDC2,SELP,SERPINB2,SLC20A1,SORBS1,SULT1E1,SYNPO2,TAGLN,TBXAS1,TGFB2,THBS1,TPM1,TRNP1,VCL,WNT5A,WTIP,ZFPM1	644 (17)
KLF6	3.032	transcription regulator	Activated	3.242	1.78e-09	ALOX5,ANGPTL4,ANXA5,ARID5B,ATF3,ATP2A2,BCKDHB,CD44,CD82,CDKN1A,CEBPB,CFLAR,CMKLR1,CYBB,DLK1,EGR2,ENO2,F10,GADD45B,GPC1,HIBCH,ID2,IFI30,IGF1R,IL12B,IL6,IRF1,ITGA5,ITGB3,IVD,LCP2,LGALS3,LPAR1,MMP9,MMUT,MRC1,MYC,MYD88,NFKB1,NR4A1,OSMR,P4HA2,PDCD1LG2,PFKFB3,PHLDA1,PIM1,PLA2G7,PLAT,PTAFR,RHOB,SDC1,SERPINB2,SGMS2,SLC16A6,SLC2A6,SOCS3,TGFB1,VAV3	765 (17)
ATF4	1.04	transcription regulator	Activated	3.181	1.12e-08	ANKRD1,AREG,ASNS,ATF3,BCAT1,BTG1,CA9,CD55,CDKN1A,CEBPB,CFAP74,CHAC1,CSRP3,CYP27A1,DDIT4,EIF2S2,FN1,GDF15,IGFBP2,IGFBP5,IHH,IL6,JUN,KL,KLF4,LGALS3,MTHFD2,NID2,NOX4,OSMR,PSAT1,PSPH,RUNX2,SERPINF1,SESN2,SH3BP2,SH3RF3,SLC38A2,SLC38A3,SLC6A9,SLC7A1,SLC7A11,SLC7A3,SNTB1,SSBP2,TGFB2,TNFRSF10B,TNFRSF11B,WNT11	814 (20)
SOX4	0.709	transcription regulator	Activated	3.129	2.26e-08	ADAMTS4,AMOTL1,B3GNT5,BCAR3,BLK,CAPN2,CD2,CD74,CHAC1,CLIC6,CSRP3,DBNDD2,DUSP4,EFNA5,EMB,EMP1,ENTPD1,EOMES,EVL,FCER1G,FGF13,FN1,FOS,IFI30,KANK1,LMO7,LUZP1,MAGI1,MYOD1,NUAK1,PPIC,PRXL2A,PXYLP1,RNF144A,S100A11,SEMA3B,SLC2A6,SLC5A9,SLC7A3,SPI1,SYNDIG1L,TEAD1,TENM4,TES,TNFRSF19,TUBA1A
PDX1		transcription regulator	Activated	3.03	3.29e-06	ABCC8,ACTB,AKR1B1,ALDOB,ANXA2,ARRDC4,ASNS,ATF3,ATP2A2,CD44,CHGB,CKB,DLK1,DUSP5,DUSP6,EGR1,FBXL17,FGF1,FGF2,G6PC2,GAP43,ID1,ID2,IGF1R,IL6,INSIG1,JUN,KLF6,MAOA,MAOB,MYC,NFKB1,PCSK2,PPP2R2C,SCG2,SEZ6L,SPP1,TRPC3,UCN3	830 (18)
WWTR1	0.131	transcription regulator	Activated	3.03	6.64e-19	A4GNT,ACAN,ACSS2,ACTA2,ADAM8,AIFM3,AK5,AMN1,ANGPTL4,ANKRD52,ARHGAP15,ATF3,CCL26,CCN1,CCN2,CD109,CD44,CD74,CDKL2,CDKN1A,CFLAR,COL11A1,COL6A1,COL9A1,COL9A3,CORIN,CPXM2,CRIM1,CTHRC1,CYP17A1,DIAPH2,DUSP4,EMP1,EOMES,F13A1,FGF10,FMOD,FN1,GDF15,GJA1,GLRX,GM2A,GPRC5A,GSN,HMGCR,ID2,IL6,INHBA,IRX3,ITGA8,ITGB2,ITM2C,KRT14,KRT17,LATS2,MBLAC2,MYLK,NGFR,NPPA,OTOGL,PKP2,PLEKHF2,PLIN4,PROSER2,RUNX2,SH3BP1,SPP1,S…	867 (23)
HMG20A	-0.332	transcription regulator	Activated	2.967	2.9e-15	ACSS2,ATF3,ATP2A2,CCN1,CCN2,CD44,CSF1,DCN,ECM1,EDN1,ERRFI1,FGF2,HBEGF,HMGCR,HSD17B7,IL6,INHBA,ITGA2,ITGA5,JUN,LIF,LY6E,MGP,MYC,MYLK,NIBAN1,OSMR,RGS16,SDC4,SEMA3B,SGCD,SLC1A2,SLC7A1,SQLE,TACR1,TAGLN,TGFB1,TGM2,THY1,TIMP3,TNFRSF11B	399 (7)
KDM3A	0.057	transcription regulator	Activated	2.904	0.00126	ACTA2,CCN1,CCN2,EDN1,GDF15,KLF5,LOXL2,MMP9,MYC,PPP1R3C,TAGLN,TNC	521 (11)
JUNB		transcription regulator	Activated	2.804	6.32e-06	APOC3,ATF3,BDNF,C1QB,CD44,CD82,CFD,CFLAR,DUSP1,E2F7,FBLN5,FN1,FTH1,ID2,IL12B,IL6,IL9,INHBA,ITGAV,ITGB3,LIPE,LPAR1,MMP1,MMP9,MYL12A,NCF2,PIM1,RASGRF1,RUNX2,SERPINB2,SLC7A1,STAR,TGFB2,TIMP3	888 (19)
NPM1	0.002	transcription regulator	Activated	2.797	1.92e-12	ACTA2,ADAM8,ANO6,CADM1,CCN1,CCN2,CD47,CEBPB,COL12A1,COL16A1,COL6A2,CSF1,CSF1R,ECM1,EDIL3,EGFL7,EGR1,EGR3,EGR4,ENO2,FN1,FTH1,FZD8,GJA1,HBEGF,HOXB5,IGFBP5,IL6,INHBA,ITGAV,JUN,KLF4,LAMC2,LIF,LOXL2,MEF2C,MMP9,MTSS1,MYC,NAV3,NR4A1,NTRK2,NUAK1,PCOLCE2,PDGFB,RELT,SDC4,WNT5A	910 (18)
SMAD3	0.768	transcription regulator	Activated	2.747	2.11e-15	ACSS2,ACTA2,ADAM12,ADAMTS2,ALPL,ANKRD1,APOA1,APOC3,AREG,ARHGAP22,BGN,CCN2,CDH6,CDKN1A,CHRDL1,CLDN11,COL6A1,COL6A2,CRISPLD2,DAPK1,DES,DUSP4,EDN1,EGR1,ESM1,FN1,FOS,FST,FZD8,GADD45B,HAS2,HBEGF,ID1,ID2,IL12B,IL15,IL2RA,IL6,IL9,INPP5D,JUN,JUND,LAMA4,LPAR1,LUM,MMP1,MMP9,MOGAT2,MUC2,MYC,MYOD1,NOX4,PCOLCE2,PDGFB,PPARGC1A,RHOB,RUNX1,RUNX2,SKIL,SLC25A4,SOX2,SPP1,SSTR2,STAR,TAGLN,TERT,TF,TGFA,TGFB1,TGFB2,TG…	976 (20)
NCOA2	-0.336	transcription regulator	Activated	2.746	1.05e-05	ADIPOQ,APC,CCR7,CDKN1A,CEBPB,CFD,CYP17A1,EGR1,FABP4,FST,FZD9,GLIS1,GPX8,HMGCR,IL6,IRF1,IRF4,KLF4,LAMC3,LIF,LIPG,LPIN1,MICALL2,MYB,NR4A2,NR4A3,P2RY12,P2RY13,PARD6B,PPP1R3B,PPP1R3C,RGS2,SOD3,STAR,TMEM100,WNT2,WNT6,WNT7B	997 (19)
FLI1	0.158	transcription regulator	Activated	2.736	0.00297	CCN2,CSF1R,DDX21,EGR1,HSPA8,ID2,IL2RA,INPP5D,MMP1,MPL,MYC,NOL6,PSPH,SRC,TNC	781 (19)
FOXS1		transcription regulator	Activated	2.648	3.69e-07	ACTA2,ADIPOQ,CD36,CDH6,CEBPB,ENPP2,FABP4,FN1,INHBA,ITGA2,JUN,LIPE,LRRC15,MYC,PIM3,SCG2,SOWAHC,TAGLN,TPM1	752 (14)
E2F3	0.976	transcription regulator	Activated	2.626	0.272	ARPC1A,CAV2,CDKN1A,EDN1,ELF3,FBLN5,FGF2,FST,INHBA,KRAS,LAMA4,MLH1,MYB,MYC,MYCN,PTN,RBPMS,TERT,THBS1,TIMP3,WFDC2
HOXA10		transcription regulator	Activated	2.482	3.97e-06	ACTB,ADIPOQ,ALDH1A2,ALOX5AP,ALPL,B3GALNT1,BCHE,CDKN1A,CFD,CSF3R,CYBB,DPP4,EGR2,ENPP2,FCER1G,FN1,FST,GJA1,HMGCR,HSP90AA1,ID1,ID2,IGFBP5,IRX3,ITGB3,LEPR,MAP1B,MSN,MYCN,MYLK,NCF2,NR4A1,PCP4,REM1,SLC27A1,STK17B,TDO2
NFKB1	1.624	transcription regulator	Activated	2.482	7.11e-09	A2M,ADAMTS4,AKR1B1,ANKRD1,BLK,CCL17,CCN1,CCN2,CD44,CD82,CDKN1A,CSF1,CTSB,CYBB,DTX1,DUSP1,E2F7,EGR1,EHF,ELF3,ENPP2,FAS,FGG,FLNB,FN1,FOS,GADD45B,GJA1,GNAO1,HAS2,IKBKE,IL12B,IL18,IL2RA,IL6,IRF1,IRF4,LBP,MMP9,MYB,MYC,NFKB1,NOX5,NR4A1,NR4A2,NR4A3,PDGFA,PIM1,PLK3,PTAFR,PTPN6,RIPK3,SDC4,SELP,SLC25A4,SLC7A2,SPI1,SYTL1,TERT,TGFB1,TLR2,TNFRSF4,TNFSF15,TP63,WT1	778 (11)
FOXL2	2.116	transcription regulator	Activated	2.479	8.51e-06	AMH,ATF3,CYP17A1,DLX3,ESM1,FAS,FOS,FST,GDF9,GPRC5B,HMCN1,HRH2,IL6,INHBA,LIF,MAFF,MYB,NR4A3,PPARGC1A,RGS2,RSPO3,SERPINB2	733 (22)
MYT1		transcription regulator	Activated	2.449	0.00559	ARHGDIB,DAPP1,GLT8D2,MILR1,PTGR1,STEAP3
TEAD4	0.052	transcription regulator	Activated	2.404	1.47e-10	ACTA2,ADIPOQ,AK5,AMOTL2,ARID5B,CAV2,CCN1,CCN2,CDK6,CDKN1A,CIDEC,DES,EDN1,EDNRA,EOMES,FABP4,IGFBP5,IL6,IRF6,JUN,KLF8,LATS2,MB,MMP9,MPP4,MYH7,NUAK1,PTPRO,RANBP1,SDC2,SESN2,TAGLN,TFAP4,THBS1,TP63,TPM1,TRNP1	959 (23)
ECSIT		transcription regulator	Activated	2.393	0.0382	CD44,CFLAR,IL6,NFKB1,NR4A2,PIM1
YBX1	-0.402	transcription regulator	Activated	2.335	0.107	ACTA2,CCL26,CDH20,CDK6,CDKN1A,EPHA2,FGF2,FOS,ID1,IL6,IRF5,KLF4,LGALS3,LHCGR,LRP2,MMP1,MYC,PDGFB,TGFB1
SMAD2	-0.111	transcription regulator	Activated	2.335	7.06e-07	ACAN,ACTA2,ADAM12,ALPL,BGN,CACNA1D,CCN2,CDKN1A,CEBPB,CRISPLD2,DAPK1,ESM1,FN1,GADD45B,GSC,HAS2,IL6,IL6R,IL9,INPP5D,MET,MMP9,PCLO,PDGFB,RUNX2,SKIL,SOX2,SYT2,THBS1,TIMP3,TPM1,TPM3	917 (19)
CCND1	1.055	transcription regulator	Activated	2.325	7.11e-09	AREG,C7,CALU,CCDC32,CD44,CDCA7L,CDK6,CDKN1A,CLIC6,COL20A1,CPED1,DDIAS,DYNC1LI1,E2F7,ENDOD1,ENPP2,EPHA2,ERRFI1,GATA4,GPRC5A,GPRIN2,HACL1,HSPA8,HSPB1,HSPB8,ID1,ITGAV,ITGB3,ITGB6,IVD,KRT14,LASP1,MAFF,MAML3,MAP3K5,MBLAC2,MYBL1,MYC,MYLK,MYO7A,NIBAN2,NOP2,NRSN1,PAH,PBLD,PTBP3,RAB3B,RFC5,RGS2,SATB1,SELENBP1,SOX11,SOX2,SPP1,ST6GALNAC1,TGFB3,THNSL1,TMEM17,TMPRSS2,TP53INP1,TUBA1C,UAP1,UHRF1,WWOX,ZNF423	799 (18)
KLF5	2.513	transcription regulator	Activated	2.324	0.0029	ACTA2,CD44,CDKN1A,DUSP1,EGR2,EPHA2,FGFBP1,IL6,JUN,KLF5,MAFF,MMP9,MYC,NIBAN2,PDGFA,PDGFB,PPP1R1B,RUNX1,SOX2,TAGLN,TGFB1,TWIST1	858 (18)
HAND2	1.137	transcription regulator	Activated	2.317	0.00305	ABRA,ACTC1,ATP2A2,CCBE1,DES,ECM2,FAP,GJA1,GJA5,HSPB7,IL6,MYL4,NPPA,TPM1
NOTCH1	-0.051	transcription regulator	Activated	2.268	1.25e-17	ACTA2,ANGPT1,ANKRD1,AREG,ASB2,ASCL1,CCN1,CCN2,CD44,CD82,CDKN1A,CEBPB,CFD,CFLAR,CHGA,CSF1R,DES,DLK1,DTX1,EFNB2,ENO2,ESM1,FABP7,FCER1G,FGF2,FOS,GAA,GFI1B,GJA5,HEY2,HSPA8,HSPH1,ID1,ID2,IGF1R,IGFBP2,IHH,IL12B,IL18,IL2RA,IL6,IL9,IRF1,ITGA6,KRT14,LIPE,LYVE1,MMP1,MUC2,MYC,MYCN,MYH7,MYLK,NFKB1,NGFR,NRARP,PDGFB,PFKFB3,PPARGC1A,PRAG1,PROX1,PTGDS,REN,RGS5,RLBP1,RND3,RUNX2,SOX2,SPI1,SPP1,TAGLN,TGFB1,TGFB2,TG…	873 (17)
PTTG1		transcription regulator	Activated	2.247	0.227	ASNS,CD44,CDKN1A,CEBPB,FGF2,MLH1,MYC,RAD51B,SOX2,TGFA
HOXB9	-0.053	transcription regulator	Activated	2.233	0.00737	AREG,FGF2,REN,SMURF2,TGFB1,TGFB2
THRAP3	0.087	transcription regulator	Activated	2.213	0.0382	ADIPOQ,CFD,HAS2,RARRES2,RUNX2,ULK1
PKNOX1	-0.07	transcription regulator	Activated	2.2	0.0382	FABP7,FGF2,HOXB2,IL6,PPARGC1A,REN
ATF3	2.717	transcription regulator	Activated	2.194	0.00641	ADIPOQ,ASNS,ATF3,CD82,CDKN1A,CHAC1,CTPS1,DHODH,FBP1,GSN,HSPB1,ID1,IL12B,IL6,JUN,KL,MMP1,NUDT5,PSAT1,PSPH,RIPK3,SLC11A1,TLR2,TNFRSF10B	800 (19)
ELK4	0.328	transcription regulator	Activated	2.19	0.0227	EGR1,EGR2,EGR3,FOS,IL18,NR4A1
ETV1	0.41	transcription regulator	Activated	2.181	0.000684	ASCL1,CCL26,HSD17B7,ITGAV,ITGB3,MET,MMP1,TERT,TMPRSS2,TWIST1	335 (7)
MAZ	-0.456	transcription regulator	Activated	2.172	0.0321	ATF3,CCL26,CDKN1A,FGG,IL15,KRAS,MMP1,MMP9,MYC
JUND	1.536	transcription regulator	Activated	2.156	5.48e-05	APOC3,BDNF,C1QB,CFD,COL6A1,CYBB,FTH1,IL6,JUND,LHCGR,MMP1,MMP9,NCF2,NOX4,NR4A1,RUNX2,SDC1,SERPINB2,SPP1,TWIST1	936 (18)
TEAD3	0.17	transcription regulator	Activated	2.117	2.57e-09	ACTA2,AK5,AMOTL2,ARID5B,CCN1,CCN2,DES,EDN1,EDNRA,IGFBP5,LATS2,MPP4,MYH7,NUAK1,PTPRO,SDC2,TAGLN,THBS1,TP63,TPM1,TRNP1
MEF2D	-0.233	transcription regulator	Activated	2.076	7.3e-07	BDNF,BLK,CCN2,EGR2,FN1,FOS,IKZF1,IRF4,JUN,JUND,KLF2,MYH7,MYOD1,NPPA,NR4A1,PPARGC1A,SLC7A11,SOD3,STAR,TGFB1,TGFB2,TGFB3	574 (15)
MYC	2.412	transcription regulator	Activated	2.073	1.65e-10	ABCC3,ABCG4,ACAN,ACTA2,ACTB,ACTN1,ALDOB,ALOX5,ANGPT1,ANGPT2,ANGPTL4,ANXA5,APCDD1,APOC3,ARHGAP22,ASCL1,ASNS,ASS1,BCAT1,BCKDHB,BDNF,BIN1,CAPN2,CASP10,CD44,CD47,CD48,CD55,CDK6,CDKN1A,CFLAR,CIDEC,CLDN1,CNP,COL14A1,COL8A1,CRYAB,CSF1,CSF1R,CSPG4,CSRP2,CTBS,CTPS1,CTSB,CTSD,CYFIP2,CYP26A1,DBN1,DDIT4,DDX18,DDX21,DHODH,DLX3,DNM3,DNMT3B,DUSP1,DUSP4,DUSP5,DUSP6,ECM1,EDN1,EGR1,EGR2,EIF2S2,EMP1,EOMES,EPCAM,EPH…	912 (18)
SMAD4	0.242	transcription regulator	Activated	2.07	1.79e-14	ACAN,ACKR3,AGR2,ALPL,ANGPT1,ANGPT2,ANGPTL4,APELA,APLNR,APOA1,APOC3,AREG,ASCL1,BDNF,BGN,CCL21,CCN2,CDK17,CDK6,CDKN1A,CNMD,COCH,CSF1,CTSD,CXCL14,CYB561,CYP17A1,DAPK1,DLX3,EDN1,FAP,FN1,FOS,FST,GADD45B,GJA1,HAS2,HEBP1,HMCN1,HMGA2,HRH2,ID1,ID2,IGFBP2,IGFBP5,IHH,IL12B,IL12RB1,IL18,IL6,IL9,INHBA,INPP5D,ITGA6,ITGA9,ITGB3,LPAR1,MET,MMP1,MPST,MUC2,MYC,MYCN,NKX2-5,NUP153,PDGFB,PLK3,PNOC,RGCC,RUNX1,RUNX2,SKI…	887 (18)
ETS1	0.137	transcription regulator	Activated	2.067	0.00107	ARHGDIB,CCN2,CD44,CD79B,CDK6,CDKN1A,CHAC1,CSF1R,EGR1,FN1,GABRE,HSPA8,HSPB8,ID2,IL12B,IL2RA,INSIG1,ITGB2,ITGB3,ITGB6,MET,MMP1,MMP9,MYB,MYC,PHLDA2,REN,RHOBTB3,RUNX1,RUNX2,SLC7A11,SPI1,SPP1,TBXAS1,TGFA,TGFB2,THY1,TWIST1	879 (23)
ELK1		transcription regulator	Activated	2.064	1.98e-05	CDKN1A,EGR1,EGR2,EGR3,EGR4,FOS,ITGAV,ITGB6,JUN,MMP9,MTHFD2,MYLK,NR4A1,RUNX2,SLC7A11,SOCS3,SPP1,TAGLN,TERT,THBS1,TNFRSF10B	992 (21)
ELF3	-2.28	transcription regulator	Activated	2.061	0.000687	ADIPOQ,ANGPT1,ANGPTL4,EHF,ELF3,FABP4,FN1,IL12B,IL6,MET,NFKB1,TIMP3	752 (16)
NRIP1	0.801	transcription regulator	Activated	2.024	0.000407	ACACB,APOA1,AREG,CD36,CDKN1A,CIDEA,CRABP1,FABP3,HAS2,IL6,PDK2,PDK4,PPP1R3B,SLC25A19,STAR,TNFAIP6	1042 (24)
FIGLA		transcription regulator	Activated	2	1	ADAD1,CYP17A1,ELAVL2,TEKT1
ATF7	0.004	transcription regulator	Activated	2	0.00607	DUSP1,DUSP10,DUSP5,DUSP8	211 (5)
TEAD2		transcription regulator	Activated	2	1.51e-06	AK5,ARID5B,CCN1,CCN2,EDN1,EDNRA,IGFBP5,MPP4,NUAK1,PTPRO,SDC2,TAGLN,THBS1,TP63,TPM1,TRNP1,UHRF1	375 (7)
MECOM	-0.607	transcription regulator		1.982	0.0368	CDKN1A,DCN,HSPB7,ITGA6,ITGB3,SCUBE3,SKIL
SAP30	1.606	transcription regulator		1.98	0.00363	ADM2,CLDN1,LHCGR,PDGFB
JUN	1.259	transcription regulator		1.964	5.33e-15	A2M,ACP5,ACTA2,ANKRD1,ANXA1,ANXA2,APOC3,ARHGDIB,ASNS,ATF3,BDNF,BTG1,C1QB,CAP2,CAPN2,CCN1,CCN2,CD44,CDK5R1,CDKN1A,CFD,CFLAR,CHGA,COL24A1,CSF1,CSF1R,CYGB,CYP17A1,DUSP1,DUSP5,DUSP6,E2F7,EDN1,FABP4,FABP7,FAS,FBLN5,FGF2,FN1,FOS,FTH1,FTL,GAP43,GJA1,HMGA1,HOMER1,ID2,IGF1R,IGFBP2,IL12B,IL2RA,IL6,IL9,ITGAV,JUN,LBP,LGALS3,LHCGR,LIF,LPAR1,LPIN1,MAF,MAOB,MCF2L,MET,MMP1,MMP9,MYB,MYC,MYH9,MYOD1,NCF2,NKX2-5,NOX…	1020 (19)
TGIF1	1.56	transcription regulator		1.953	0.0953	ACSS2,DRD1,IL6,STRA6,XCL1
EGR3	1.546	transcription regulator		1.943	0.00406	ACTN1,ATF3,BDNF,CBLB,CISH,DTX1,EMB,GSN,HTR2A,IL2RA,IL6R,ITGB3,JUN,LMO7,MYB,MYC,NGFR,PIM1,PPL,PSD,RFLNB,RNPEP,SOCS3,SYTL1,TGFB3,TJP2	796 (19)
NOTCH2	0.484	transcription regulator		1.927	6.2e-07	ACP5,ACTA2,ASCL1,CD44,DES,DTX1,EPCAM,FCER1G,FN1,FZD9,HEY2,IL6,ITGB2,LHCGR,MARCO,MUC2,PDGFA,PRAG1,PTAFR,RGS5,SDC2,STAR,TAGLN,VAV1,WNT16	708 (15)
RELB		transcription regulator		1.895	0.0193	ACKR3,ALDH1A2,ANXA5,CACNA1E,CDKN1A,ENPP2,FMN1,FYB1,IGSF3,IL12B,IL6,IRF4,MICAL3,MYB,MYC,OSBPL5,PPFIBP2,PPL,TGFA,TRAF3,WHRN
TAF4B	1.961	transcription regulator		1.89	3.92e-05	CCN2,FN1,FST,INHBA,IRF1,ITGA6,JUN,SPP1,TAF4B,TGFB1,TGFB3
HIF1A	0.685	transcription regulator		1.82	7.48e-11	ABCC8,ACAN,ACE,ACTA2,ADIPOQ,AFAP1L1,AGTR1,ALOX5AP,ANGPTL4,AQP4,AQP9,ASNS,ATP2A2,ATP6V0D2,BGN,BNIP3,CA9,CCN1,CCN2,CCR2,CCR7,CD36,CD44,CDKN1A,CLDN1,CSF1,CTPS1,CTSD,D2HGDH,DCN,DDIT4,DPF3,DTX1,EDN1,EDNRA,ELF3,ENO2,ENTPD1,FAS,FHL2,FN1,FOS,GADD45B,GCHFR,GJA1,HSPB1,ID1,ID2,IGFBP2,IGFBP5,IL12B,IL15,IL6,IL9,IRF5,ITGA5,ITGAV,ITGB2,ITGB3,JMJD6,JUN,KRT14,LOXL2,MAF,MAFF,MB,MEF2C,MET,MMP1,MMP9,MNX1,MUC2,MYC,MY…	931 (16)
WDR5		transcription regulator		1.755	0.0274	MYC,MYCN,RUNX2,SFRP2,SOX2,SPP1,TMPRSS2
EPAS1	0.248	transcription regulator		1.747	7.55e-11	ACP5,ADIPOQ,ANGPT2,ANGPTL4,AREG,BNIP3,C1QA,CA9,CCN1,CCN2,CCN5,CCR2,CD36,CDK6,CDKN1A,CEBPB,CIDEA,CKB,CKMT2,CLDN1,CYBB,DTX1,EDN1,ENO2,ENPP2,FABP1,FABP3,FABP4,FGF2,FN1,FOS,GADD45B,GAL3ST1,GCHFR,GJA1,HSD3B1,IGFBP5,IL2RA,IL6,ITGAV,ITGB2,ITGB3,LOXL2,MAFF,MB,MYD88,MYO7A,MYOM2,NEFL,NRARP,OMA1,PDGFB,PFKFB3,PKIB,RGS4,RUNX2,SOX2,TERT,TGFA,TGFB1,TGFB3,TNFRSF11B,TNFRSF4,TNFSF15,UHRF1,ZNF423	695 (19)
ZEB1	-0.313	transcription regulator		1.733	0.00123	ANKRD1,CCN1,CCN2,CCR2,CD47,CD74,EDN1,ESRP2,FAS,FN1,KIT,LAMC2,LOXL2,MAP1B,MMP1,MMP9,MRC1,NFKB1,RAB3IP,RBM47,S100A10,TF,THBS1,TNFRSF10B,TP63	849 (19)
MGA	0.661	transcription regulator		1.732	0.00972	ACE,BMF,BNIP3,HEXA,MAP3K15,P4HA2,PPP1R1B,RNF157,TF,TGM2,TRIB2,TWIST1
SMARCA2	-0.117	transcription regulator		1.715	0.00169	ALPL,BMPR1B,CD36,CD44,COL11A1,DES,IGFBP5,IL6,LAMC2,MEF2C,MYLK,PHEX,PMEL,TAGLN,TUFT1	843 (20)
FOXQ1		transcription regulator		1.71	0.00299	FN1,MYC,WNT11,WNT16,WNT6,WNT7B	543 (7)
HSF1	0.34	transcription regulator		1.7	1.67e-05	BAG3,BCL10,CCN2,CCR2,CCT5,CD36,CEBPB,CFLAR,COL6A2,CRYAB,CSRP2,DNAJA4,DNAJB6,DPT,FGF1,FMOD,GABRA4,HSP90AA1,HSPA8,HSPB1,HSPB8,HSPH1,IL6,INHBA,JMJD6,JUN,KCNF1,LAMA4,LIF,LIPE,LRIG1,MLH1,MYH7,NFKB1,PDZD2,PLIN4,PPARGC1A,RAD51B,RANBP1,SGO2,SLC5A3,STAR,TEX11,THBS2,TRAF3,TTR,ZFAND2A	977 (20)
GLI3	0.729	transcription regulator		1.689	5.66e-05	ACTA2,ALDH1A2,DLX2,DUSP1,DUSP5,EGR1,FGF10,FGF19,IL6,IRF1,KLF2,KRT17,LAPTM5,MYCN,OSR1,PAX9,PCDH8,RUNX1,RUNX2,SFRP1,STK32C,TCF15,TERT,TGFB2,WNT5A	751 (10)
SP1	0.195	transcription regulator		1.638	1.4e-16	ABCC8,ACTA2,ADRA1B,AFAP1L1,AGTR1,ALOX5,ALPL,ANK1,APOA1,APOC3,ASNS,ASS1,ATF3,ATP2A2,BDNF,CCN2,CD55,CD79B,CD99,CDK6,CDKN1A,CEBPB,CHGA,CKB,COL8A1,CRYAB,CRYBB1,CTSD,CYP17A1,CYP26A1,DBF4,DIAPH2,DLX3,DNM1,DRD1,EGR1,F10,FAS,FGF10,FGF2,FGFBP1,FN1,FOS,GABRA4,GDF15,GJA1,GSS,HAS2,HBEGF,HMGA1,HMGCR,HSD17B7,HSD3B1,IGF1R,IL12RB2,IL15,IRF1,IRF4,ITGA2,ITGAV,ITGB3,JUN,KCNA3,KIT,KLF4,KLF6,KLF8,LCAT,LHCGR,LIPE,MAOA…	985 (24)
MEF2C	-2.075	transcription regulator		1.634	8.79e-20	ABCC2,ABRA,ACTA2,ACTC1,ACTG2,ARC,ATF3,ATP1B4,ATP2A2,BDNF,BLK,CA10,CCBE1,CCR2,CDKN1A,CERS3,CKB,COL11A1,COL19A1,COL9A1,CTNNA3,DES,ECM2,EGR2,FABP7,FAP,FBP1,FOS,FTH1,GATA4,GJA1,GJA5,HOXB5,HSPB7,IKZF1,IL6,IRF4,ITGA2,ITGA7,JUN,JUND,KLF2,KLF4,LMOD1,MEF2C,MOBP,MYH7,MYL4,MYOD1,MYOM2,MYOZ2,NAV3,NPPA,NR4A1,NR4A3,PAX9,PLP1,PLXNA4,PPARGC1A,RAB44,RUNX2,SFRP2,SMYD1,SOX2,STAR,TAGLN,TBX18,TBX20,TBX5,THBS1,TPM1,TS…	815 (19)
NFKB2	1.054	transcription regulator		1.624	0.00257	AKR1B1,ALDH1A2,ANXA5,CCDC141,CCR7,CDKN1A,CFLAR,COCH,CTSS,DPT,ENPP2,FAP,FOS,GAL3ST1,GDF6,IGFBP5,IRF4,LMCD1,MAF,MMP9,MMRN1,MYB,MYC,PAMR1,PHLDA2,RAB3B,RBFOX3,TGM4	591 (16)
CREM	0.806	transcription regulator		1.596	3.12e-06	ACE,ACTC1,ARC,ATF3,ATP2A2,CEBPB,COL8A1,DUSP1,DUSP4,EGR1,EGR2,EGR4,ERRFI1,FOS,GADD45B,HMGCR,INA,KLF5,MEST,MIDN,MSMO1,NOS1,NR4A1,NR4A2,REN,RHOB,SMC4,SPATA20,SPTY2D1,STAR,TAC1,THBS1,TPM1,TSHR	918 (25)
STAT6	0.589	transcription regulator		1.586	1.4e-06	ACP5,ACTB,ADAM11,ADAP1,ANXA1,AREG,ARID5A,ASS1,CA2,CCL17,CCL26,CCR7,CD2,CD79B,CDKN1A,CFAP74,CIDEC,CISH,CMPK2,CTSB,CTSS,CYB561A3,CYBB,DDAH1,DDIAS,E2F7,EGR1,EGR2,EPHA2,FABP1,FABP4,FCER1G,FN1,GADD45B,HMGCR,HSD3B1,IL12B,IL15,IL2RA,IL6,IL9,IRF1,IRF4,KSR1,LACC1,LCP2,LIF,LIPE,LMO7,MAF,MAOA,MAP3K5,MID1,MMP9,MOV10,MRC1,MYB,NEDD9,NPAS2,PDCD1LG2,PDGFA,PDGFC,PDK4,PKIB,PLD1,PPARGC1A,PREX1,PSTPIP1,RIPK3,RNPEP,S…	923 (17)
HES1	-0.798	transcription regulator		1.564	0.00297	ACTA2,ASCL1,CCN2,CDKN1A,CFD,CHGA,DLK1,DUSP1,FN1,GAA,IL6,PTGDS,RLBP1,SPP1,TAGLN	827 (21)
SREBF2	0.791	transcription regulator		1.564	0.038	ACSS2,AREG,CCN1,CCN2,CDKN1A,FABP5,FABP7,HMGCR,IL6,INSIG1,IRF1,KLF6,LRP2,MSMO1,RARRES2,SQLE,STAR
NOTCH3		transcription regulator		1.557	7.57e-16	ACTA2,ACTN1,ANGPT2,APOD,BGN,CD36,CDKN1A,CFLAR,COL14A1,COL6A1,COL6A2,COL8A1,DCN,DES,DTX1,ERRFI1,FABP7,FN1,GJA4,GPHN,HEY2,ID1,IL6,ITGA11,ITGA7,ITGA8,ITGA9,ITGB3,MAOB,MET,MMP9,MUC2,MYH7,MYH9,MYLK,NRARP,OGN,PDK4,PIEZO1,PRAG1,RBFOX3,RGS5,S100A11,S100A6,SDC2,SGCD,SLC1A2,SOCS3,SOD3,TAGLN,THBS1,TIMP3	760 (18)
REL	0.871	transcription regulator		1.555	0.00817	ACSS2,AGA,C1QTNF12,CACNA1E,CDKN1A,CRKL,DDX18,EGR2,FAS,FN1,FOS,GADD45B,HBEGF,IL12B,IL18,IL2RA,IL6,IL9,IRF4,IRF5,IRF6,JUN,MMP9,MYC,MYH7,NFKB1,NR4A1,NR4A3,NRARP,PFKM,PTGDS,SCN11A,SORBS1,TNFRSF10B,TNFRSF4	732 (15)
CBFA2T3	-0.043	transcription regulator		1.554	0.027	B3GALT2,CHGA,CHGB,ID2,INSRR,IRF6,PACSIN1,PEX5L,PFKFB3,SYT13,TAC1,TFAP4
CREBBP	0.3	transcription regulator		1.552	4.6e-21	ADAM12,ADCYAP1,AMHR2,ANGPT1,AQP11,ARID5A,BDNF,CA2,CCL26,CCN1,CCR7,CD44,CD74,CDKN1A,CKB,CORO2B,CRIM1,CRISPLD2,CSF1,CYBB,DCX,DNAJB4,DTX1,DUSP1,DUSP4,EGR1,EGR2,EGR3,EOMES,EVL,EYA2,FABP4,FGF2,FMNL2,FNDC3B,FOS,FOSL2,FRMD4A,GFI1B,GM2A,GRIA3,HAS2,IGF1R,IL12RB1,IL2RA,IL6,IRF1,IRF6,ITGA6,ITGA9,JUN,JUND,KCTD1,KLF2,KRT14,MAF,MCF2L,MEF2C,MLH1,MMP9,MYC,MYH7,MYO1F,MYOD1,NPAS2,NPPA,NR4A1,NR4A2,NR4A3,NTRK3,PIM1,…	771 (18)
FOXF1	-0.687	transcription regulator		1.519	9.53e-05	ACTG2,CDK6,CDKN1A,ERRFI1,FGF2,IL6,ITGA5,ITGB3,MYLK,PDGFB,THBS1,WNT5A
HHEX	0.522	transcription regulator		1.518	0.00266	AMOTL2,ANKRD1,CCN1,CCN2,FGF2,IL15,IL2RA,ITGAV,LATS2,WNT2	529 (13)
NFATC1	0.133	transcription regulator		1.502	0.000298	ACP5,ATF3,ATP6V0D2,B3GAT1,CD47,CTSK,CX3CR1,CYBB,EDN1,EGR3,FAS,IL12B,IL2RA,IL6,ITGAV,ITGB3,MYC,MYH7,NKX2-3,NOX4,PLS3,SLC7A11,SPP1,THBS1	760 (18)
EGR1	1.694	transcription regulator		1.497	1.3e-13	ACE,ACHE,ACTA2,ALOX5AP,APOA1,ARC,AREG,ATF3,ATP2A2,BDNF,CACNA2D4,CCL21,CCR2,CD44,CDK5R1,CDK6,CDKN1A,CHGA,CHGB,CSF1,CYP17A1,DUSP4,EGR1,EGR2,FAS,FGF2,FN1,FTL,GADD45B,GDF15,HBEGF,HMGCR,ID1,IGF1R,IL6,IL6R,JUN,JUND,KCNT1,LHCGR,MAOB,MMP9,MYB,MYBL1,MYC,NEFL,NFKB1,NR4A1,PCSK2,PDGFA,PDGFC,SPP1,SQLE,TGFB1,TGFB2,THBS1,TLR4,TWIST1	1073 (21)
NFKBIZ	0.047	transcription regulator		1.478	0.0443	ADAMTS4,CCL17,ELF3,IL12B,IL6,MICALL2,PFKFB3,SH3BP5
SP3	-0.135	transcription regulator		1.458	8.54e-11	ACTA2,AFAP1L1,AGTR1,ANGPT2,ASNS,ATF3,BMF,CDK5R1,CDKN1A,CNMD,CYP17A1,CYP26A1,DLX3,DNM1,DRD1,DUSP1,EGR1,F10,FAS,FGF10,FOS,GABRA4,GDF15,HAS2,IGF1R,IL12RB2,ITGA2,JUN,KLF4,LCAT,LHCGR,MAOB,MET,MUC2,MYCN,MYH7,MYLK,NCF2,NFKB1,NOS1,PREX1,PRKG1,PROCR,RRAS,SCARB1,SCTR,SRC,TAGLN,TERT,TIMP2,TLR2,TNC,TNFRSF4	874 (18)
ARNT	-0.732	transcription regulator		1.445	6.72e-05	ALOX5AP,ANGPTL4,AREG,ARID5B,BLK,BNIP3,CA9,CCR5,CCR7,CEBPB,CLDN1,CRYAB,CTSD,DPF3,EDN1,GADD45B,GDF15,ID2,ITGAV,ITGB3,LOXL2,MAFB,MYC,MYO1C,RANBP1,RGS5,SOCS3,SOX2,SPP1,TDO2,TNFRSF19,VEGFD	1028 (22)
SP4	-0.308	transcription regulator		1.432	0.00412	ARC,CCL26,CDKN1A,GABRA4,IGF1R,IL15,IL18,LHCGR,MYH7,NFKB1,TNFSF15	327 (7)
TBX5	-2.323	transcription regulator		1.413	3.79e-05	ACTC1,ANKRD1,ATP2A2,CCBE1,DES,ECM2,FAP,FGF10,GATA4,GJA1,GJA5,HEY2,HSPB7,IL6,MEF2C,MYL4,NKX2-5,NPPA,TBX5,TPM1	628 (16)
CTNNB1	-0.012	transcription regulator		1.402	2.89e-16	ACAN,ACAP1,ACTA2,ACTB,ACTC1,ADIPOQ,ADRA2C,ALDH1A2,ANXA1,APC,APCDD1,APOD,AQP4,AQP5,ASCL1,ASRGL1,ATP6V0D2,BDNF,BGN,BMF,CA9,CACNA1G,CADM1,CCN1,CCN2,CD36,CD44,CD47,CD99,CDKN1A,CFD,CHGA,CIDEC,CNMD,CNN2,CNTFR,CTHRC1,CXCL14,CYFIP2,DDX21,DES,DIO1,DIXDC1,DLK1,DTX1,ECM1,EDAR,EDIL3,EDN1,EGR1,ENC1,ENO2,ENPP1,ENPP2,ENTPD1,EOMES,EPCAM,EYA2,F13A1,FABP1,FABP4,FAS,FCER1G,FGFBP1,FN1,FOS,FST,GADD45B,GALM,GAP43,GDF1…	957 (17)
TFAP2A	-0.26	transcription regulator		1.399	0.0291	AMH,ANXA1,CCN5,CDKN1A,DRD1,EYA4,FREM2,GM2A,IL12B,KLF4,KLHDC3,KRT14,LHCGR,MMP9,MYC,NOS1,PSAP,SESN3,TERT,TPM1,TPM3
E2F1	0.86	transcription regulator		1.388	2.69e-05	ACAN,ACTA2,ADIPOQ,AGR2,ALPL,ANGPT2,BNIP3,CA2,CCNO,CD44,CDK6,CDKN1A,CFLAR,CKB,CRKL,CRYAB,CTSB,DBF4,DUSP1,DUSP10,DUSP4,EGR1,EGR2,EGR4,ENO2,EYA2,EYA4,FAS,FGF13,FGF2,FHIT,FOS,FOSL2,GM2A,GNG4,HMGA1,HSPA8,JMY,KCNA3,KIT,KRAS,KRT14,MAF,MAP3K5,MLH1,MMP1,MMP9,MYB,MYC,MYCN,MYH7,MYH9,NR4A1,NR4A3,PDK4,PPARGC1A,PRKAA2,PRPS2,PSAT1,RANBP1,RFC5,RND3,ROCK2,SERTAD2,SFRP1,SINHCAF,SLC7A11,SMARCA5,SMC4,SMURF2,SOX2,STK…	892 (20)
MYB	3.712	transcription regulator		1.384	9.16e-05	ACAP1,ADAM12,ATF3,BMF,CCL17,CCR2,CELA2A,ENO2,FN1,GFI1B,HSPA8,IGF1R,IGFBP5,IKBKE,IL2RA,IL6,JUN,KIT,KLF4,LIF,MAFB,MMP1,MTSS1,MYB,MYC,NEDD9,NFKB1,NMU,P2RY13,PRAG1,RGCC,SDC1,SDC4,SOX2,SPP1,TWIST1,VAV1	722 (16)
PBX1	-0.188	transcription regulator		1.362	0.00266	ANGPT2,CDKN1A,CYBB,DCDC2,FABP7,FGF2,HOXB2,MMP9,NCF2,REN	649 (16)
NFATC4		transcription regulator		1.35	0.000299	ACP5,ADIPOQ,ALPL,B3GAT1,BDNF,CTSD,CTSK,FABP4,FST,SPP1	410 (7)
BACH1	0.84	transcription regulator		1.329	0.000511	AIFM3,CD44,CD74,CEBPB,DUSP1,F13A1,FTH1,FTL,GDF3,HSD3B1,IGF1R,IL6,ITGA2,MMP1,PDK2,PDK4,SLC48A1,SLC7A11,SPP1	825 (23)
IKZF1	-3.01	transcription regulator		1.301	0.000212	ABCA9,ANTXR1,C1QTNF1,CAV2,CD79B,CDH22,CDK6,CDKN1A,CISH,CSF1,DNM1,DNM3,DTX1,DUSP5,EMP1,EXTL2,FGF13,FN1,FOS,HHATL,IKZF1,IL2RA,IL6,IRF4,ITGA5,KIT,KLF4,LHFPL2,LMO2,MAN1C1,MYC,NGFR,NRARP,OTUD1,RHCE,RUNX1,RUNX2,SH3BP5,SHROOM3,SLC2A6,SPI1,TDO2,THY1,TLR4,UACA,VIPR1,ZFPM1	891 (17)
TRPS1	1.327	transcription regulator		1.299	0.00014	ALPL,DPEP2,ENPP1,FN1,GABRA3,PACSIN1,PHEX,PHOSPHO1,RANBP3L,RUNX1,RUNX2,SMPD3,SOX2,TGFB2	421 (7)
EGR2	3.517	transcription regulator		1.29	2.72e-05	ACTN1,ASS1,ATF3,CALCA,CBLB,CDH6,CDKN1A,CEBPB,CISH,CLCN2,CNTFR,COL11A1,CRABP1,CSF1R,DMBT1,DTX1,EGR1,EGR2,EMB,FGF2,FOS,GDF15,GSN,HMGCR,HOMER1,ID2,IGF2BP1,IL6R,IL9,ITGB3,JUN,LMO7,MYB,MYC,NEFM,NGFR,PIM1,PPL,PSD,RFLNB,RNPEP,SLC1A3,SOCS3,SOX2,SQLE,STAR,SYTL1,TGFB3,TJP2	801 (19)
LYL1		transcription regulator		1.287	0.00458	ANGPT2,BAALC,EGR1,ID1,ITGA2,NFKB1,RAPGEF1
CEBPB	1.795	transcription regulator		1.278	4.71e-07	ACTA2,ADIPOQ,ALDH1A2,ALOX5AP,ANTXR1,APCDD1,APLNR,APOC3,ASNS,BASP1,BDNF,C1QA,C1QC,CCR5,CD74,CDKN1A,CEBPB,CFD,CIT,CSF1R,CSF3R,CTPS1,CYP17A1,CYP3A4,DAPK1,DCN,DLX3,EDIL3,EFNB2,FABP4,FAS,FCER1G,FHL2,FKBP6,FN1,FOS,FTL,FZD8,GDF15,HAS2,HMGA1,HPX,HSP90AA1,HSPA8,ID1,IKBKE,IL12B,IL1RAP,IL6,INHBA,IRF4,JUN,KL,KLF5,LBP,LCP2,LEPR,LHCGR,LPIN1,LY96,MGP,MLH1,MMP1,MRC1,MYC,NDRG4,NUP153,PCOLCE2,PCTP,PDK4,PPARGC1A,PR…	873 (18)
ACTN4	1.137	transcription regulator		1.256	0.000111	ANGPTL4,DCN,FOS,MMP1,MMP9,MYC,MYCN,PDLIM1,WNT5A	895 (21)
HOXD3	-1.1	transcription regulator		1.219	0.00197	ITGA5,ITGB3,SDC1,TAGLN,TGM2,THBS1,TSPAN7
ETS2	0.676	transcription regulator		1.196	5.98e-05	CDKN1A,CSF1R,CTSB,CTSK,CYP27A1,DUSP6,FGF1,FOS,IL12B,IL2RA,JUN,MKX,MMP1,MMP9,MYC,PCSK6,SOX2,SPP1,TERT	860 (23)
MSX2	-0.23	transcription regulator		1.194	0.000275	ALPL,AQP4,EGR2,GJA1,IHH,PROX1,SPP1,TGFB2,TGFB3,TP63,TWIST1,WNT7B	691 (14)
TEAD1	1.231	transcription regulator		1.175	0.000119	ACTA2,AK5,AMOTL2,ARID5B,ATP2A2,CCN1,CCN2,CDK6,CDKN1A,DES,EDN1,EDNRA,FABP3,IGFBP5,IL6,LATS2,MB,MPP4,MYH7,NPPA,NUAK1,PPARGC1A,PTPRO,RUNX1T1,SDC2,SYT4,TAGLN,TGFA,THBS1,TP63,TPM1,TRNP1	810 (21)
HOXB7	-0.509	transcription regulator		1.172	0.00109	ANGPT1,ANGPT2,FGF2,MMP9,REN	861 (20)
CUX1	-0.384	transcription regulator		1.164	0.0398	ARHGDIB,CCN5,CDKN1A,CYBB,DUSP4,ITGB2,MYC,MYH7,NPPA,PIK3IP1,PTPN14,PTPN21,RHOBTB3,THBS1,WNT5A,WNT6
FOXO1	0.342	transcription regulator		1.158	4.31e-13	A2M,ACAN,ACTA2,ADIPOQ,ALDOB,ALOX5,ANGPT1,ANGPT2,ANGPTL4,APOC3,AQP9,ATP6V0D2,BNIP3,C1QA,CA2,CASTOR2,CCN2,CCR7,CD36,CD79B,CDKN1A,CERS4,CFLAR,CIDEA,CKMT2,CTSK,CYP27A1,DAPK1,DCX,DDIT4,EDA2R,EDN1,EGR1,EGR2,EGR4,EOMES,EPHA10,FABP4,FABP5,FAS,FLNB,FMOD,FN1,FOS,FST,GADD45B,GRHPR,HMGCR,IGF1R,IKZF1,IL15,IL18,IL6,IRF4,ITGAV,ITGB2,ITGB6,JUN,KLF2,LCP2,LHCGR,MB,MMP1,MMP9,MPL,MYC,MYCN,PAK1,PDK4,PIK3IP1,PPARGC1A,…	884 (20)
IRF6	1.205	transcription regulator		1.141	0.00309	ENPP2,GRHL3,IL12B,IL18,IL6,KLF4,MRC1,NR4A2,PPARGC1A,SCARB1,SLC7A2,TFAP4,TLR4	610 (18)
NFAT5	0.365	transcription regulator		1.114	4.05e-19	ACAN,ACTN1,AKR1B1,ALPL,ANXA1,ANXA2,AQP4,AREG,ASB2,ATP2A2,B3GAT1,BCL10,BTK,C1QA,C1QB,C1QC,C1QTNF1,C1QTNF5,C1QTNF6,CARD11,CCL21,CCR2,CCR7,CD36,CD44,CD55,CD74,CD79B,CDKN1A,CEBPB,CFLAR,CLIC3,CREB3L2,CREB5,CSF1,CSF1R,CSF3R,CTSS,CX3CR1,CYBB,DDIT4,EDA2R,EDAR,EDN1,EGR1,ERC1,FABP3,FAS,FCER1G,GADD45B,GDF15,HBEGF,HECW2,HSPA2,IFI27L2,IGSF6,IL15,IL18,IL2RA,IL6,IL6R,IRF1,IRF4,ITGB2,ITGB3,KIT,LBP,LIF,LY96,MAP2K…	953 (23)
USF2		transcription regulator		1.109	0.013	ACP5,APOC3,CD2,MYC,MYH9,PRKG1,REN,SPP1,STAR,TERT,TGFB1,THBS1,XCL1
NKAP		transcription regulator		1.103	7.02e-05	SLC7A11,ST8SIA1,ST8SIA4,ST8SIA6
ISX	-1.752	transcription regulator		1.091	0.00142	ALDH1A2,BCO1,LPIN1,SCARB1,TDO2,TWIST1
MYRF		transcription regulator		1.091	5.17e-07	AMOTL2,ANK2,APELA,AQP9,CCN2,CHMP4C,COL14A1,GDF15,GRB14,HPGDS,NGEF,NOTUM,NRIP2,OTUD1,PDCD1LG2,PDK4,PLP1,SDSL,SOWAHC,TNFRSF21,TRIM2
FOXO4	0.606	transcription regulator		1.088	0.00078	ACAN,ANGPT1,BNIP3,C1QA,CCN2,CDKN1A,CERS4,FABP4,FABP5,FLNB,FMOD,GADD45B,HMGCR,ITGB2,LCP2,MMP9,PRCP,PRG4,PRKAA2,RUNX2,SESN3,TGFB1	680 (12)
NFYA	0.06	transcription regulator		1.086	0.01	ACACB,CDKN1A,COL11A1,EGR1,FTH1,GADD45B,HSD17B7,IRF1,JUN,JUND,LPIN1,MLH1,OGG1,PKN3,RGS4,RHOB
HOXA3	-0.522	transcription regulator		1.078	5.59e-06	ALOX5,ANXA2,CEBPB,DAPP1,EGFL7,GFI1B,HEY2,IKZF1,ITGAV,KLF2,PSTPIP1,RUNX1,SHANK2,SOX17,SPATA6,SPI1
GATA5	-1.431	transcription regulator		1.067	0.0333	ACTC1,EDN1,MYH7,NPPA
TP53	0.146	transcription regulator		1.062	1.77e-22	ABCC2,ACACB,ACE,ACOX3,ACSF2,ACSL6,ACSS2,ACTA2,ACTB,ACTN1,ADAM12,ADAM8,ADGRB1,AEN,AK1,AKAP9,AKR1B1,ALDH1A2,ALOX5,AMOTL2,ANGPT1,ANGPTL4,ANK1,ANKRD1,ANTXR1,ANXA1,ANXA2,APC,APOA1,APOBEC2,AREG,ARPC1B,ASNS,ASS1,ASTN2,ATF3,ATG10,ATP1A1,BAG3,BCAS3,BCAT1,BDNF,BMF,BNIP3,BTG1,BTK,C1QC,CA9,CALU,CAP1,CARD11,CAV2,CCN1,CCN2,CCN5,CCR2,CCR7,CD36,CD44,CD47,CD82,CDH10,CDKN1A,CEBPB,CEP170B,CERS6,CFLAR,CHMP4C,CHN2,CK…	1055 (19)
DDB2	0.215	transcription regulator		1.044	0.0422	CDKN1A,CFLAR,MMP9,TERT
TWIST1	1.983	transcription regulator		1.039	1.02e-10	ACAN,ACTA2,APOD,C1QTNF1,CCDC3,CD44,CDKN1A,CHRDL1,CHRDL2,COL6A1,DCN,DNM1,EFNB2,EMILIN1,EPCAM,FAS,FGF10,FMOD,FN1,FOS,FREM2,GDF3,GPC1,GSN,IGFBP5,IL6,IRF5,ITGA8,ITGB3,KIT,KLF4,LGALS3,MET,MMP1,MMP9,MRC1,MYC,OSGIN1,PAMR1,PDZD2,PPARGC1A,RHOC,RUNX2,SLC28A3,SOX2,SPP1,TF,TGFB1,TGFB2,THBS2,TIMP3,TNFRSF21,ZYX	930 (21)
ID3	0.108	transcription regulator		1.031	1.71e-06	ADIPOQ,BLK,CCR7,CD44,CDKN1A,CEBPB,CSF1,DTX1,DUSP1,DUSP10,DUSP4,EFNB2,EGR2,EGR4,EOMES,FCER1G,GADD45B,IL6,IL6R,IRF4,IRF5,IRF6,ITGB3,KLF6,LEPR,LMO2,MAF,MAP2K6,MMP9,MYB,MYC,NPPA,NR4A1,NR4A3,PIK3IP1,PTPN14,PTPN5,SDC1,SH2D1A,SOCS3,TNFRSF4,TRAF3,TRAF4	908 (23)
NCOA3	-0.37	transcription regulator		1.029	0.00914	ANKRD1,CCN1,CCN2,CD44,CDKN1A,EOMES,FGF2,HOXA1,IGF1R,IRF1,MMP9,MUC2,NR0B1,PARD6B,SOX2,TAGLN,TGFB2,TRAF4	957 (24)
MYOCD	-0.046	transcription regulator		1.011	7.27e-14	ABCC2,ACTA2,ACTC1,ACTG2,ATP1B4,ATP2A2,CA10,CACNA1D,CCBE1,CDKN1A,CERS3,COL19A1,COL9A1,CTNNA3,DES,ECM2,FAP,FBP1,FN1,FOS,GATA4,GJA1,GJA5,HCN4,HEY2,HOXB5,HSPB7,ITGA2,ITGA7,KCNJ3,LMOD1,MEF2C,MYH7,MYL4,MYLK,NAV3,NPPA,NR4A3,PAX9,PLXNA4,RAB44,RUNX2,TAGLN,TAGLN2,TBX18,TBX20,TBX5,TPM1,TWIST1,VIL1	351 (9)
RFX1		transcription regulator		1.004	0.0298	ACTA2,CX3CR1,DCDC2,DNAAF4,FAP,IL12B,IL6,MRC1,MYC,SLC1A1,TGFB1
ADNP	-0.015	transcription regulator		1	0.0273	CNTFR,CRABP1,GRIN2B,PLXNA4,SOX11,WNT7B
TARDBP	0.425	transcription regulator		1	0.0423	C1QA,C1QB,CD36,CIT,CNN2,CNTFR,CSPG4,GABRA5,GALNT13,HMGCR,IGFBP5,IKZF1,IL6,INSIG1,LRRN1,MFAP2,PLP1,SFRP1,SFRP2,SQLE,TENM1,VLDLR,WNT5A
FOS	2.384	transcription regulator		0.99	1.4e-19	A2M,ACP5,ADAM12,AKR1D1,ATF3,BCAR3,BDNF,CA2,CADM1,CALU,CAPN2,CCN2,CD44,CERS4,CFD,CFLAR,CHGA,COL16A1,COL6A1,COL8A2,CRABP1,CTSB,CTSH,CYP17A1,DRD1,E2F7,EDN1,EGR1,EGR2,EMB,ENAH,ESM1,FABP4,FGF2,FHOD1,FMN1,FN1,FOS,FTH1,GATA4,GJA1,GJB6,GM2A,HAS2,HOXA1,HPGDS,HSPB8,HTATIP2,IGFBP5,IKZF1,IL12B,IL6,IRF4,ITGA2,ITGA6,JUN,KIRREL3,KLF6,KRT13,LGALS3,LRP8,LYPD6,MAFK,MAOA,MAP3K20,MET,MGAT4A,MLH1,MMP1,MMP9,MMRN1,MYC,…	942 (16)
GTF2I	-0.678	transcription regulator		0.971	0.00279	ANGPT1,ANXA1,BTK,CACNA1E,CDKN1A,DACT2,DNAAF4,FAS,FOS,ID1,IRF1,LY86,MYB,MYC,MYD88,NRARP,SLC41A3,THBS1,TLR2,TLR4	807 (16)
TFAP4	1.629	transcription regulator		0.967	2.69e-07	CD44,CDKN1A,CIT,CLDN1,CXCL14,EGR1,ESRP2,FN1,FOS,GDF15,ID1,IL12B,IRF6,LIF,MLF1,RHOBTB3,SQLE,STEAP3,TACR1	651 (7)
APBB1	-0.698	transcription regulator		0.956	0.000922	ACTA2,CD82,MYC,TAGLN,TPM1,VLDLR	890 (16)
FOSL1		transcription regulator		0.939	0.00553	ANKRD1,BDNF,CCN1,CD44,EDN1,EGR1,EGR2,FOS,GAS7,HMGA1,IL6,JUN,LHCGR,MAP1B,MET,MMP1,MMP9,RUNX2,SEMA6D,SERPINB2,SPP1,TF,THBS1	800 (17)
PPP1R13L		transcription regulator		0.937	0.0452	CDKN1A,CLDN1,GJA1,ITGAV,TP63
NFATC3	0.119	transcription regulator		0.854	5.27e-05	ACAN,ACTA2,ANGPT1,ATF3,B3GAT1,CASP10,DDIT4,EDN1,EGR2,EGR3,FOS,GAP43,IL12B,IL2RA,IL6,JUN,MUC2,NR4A1	689 (15)
MZF1		transcription regulator		0.849	0.00881	FGF2,MYB,NOS1,SOD3,TGFB1
PITX2	1.352	transcription regulator		0.848	4.51e-05	ACAD8,ATP1A1,CACNA1G,COL8A1,COL8A2,CYP26A1,DACT2,DLX2,EGR1,EOMES,FZD9,GPX7,GRHPR,HCN4,IRF6,ITGAV,KCTD1,MSC,MYC,NGFR,NPPA,PITX1,PPP1R1B,SATB1,SHOX2,SOX2,TBX5,WNT2,WNT5A,WNT6	840 (22)
GATA4	-1.371	transcription regulator		0.828	3.65e-11	ABRA,ACTC1,ACTG2,AMH,ANGPT4,ANKRD1,ASCL1,ASS1,ATP2A2,CCBE1,CCN2,CLDN1,CORIN,CTHRC1,CYP17A1,DES,DLX3,ECM2,EDN1,ESPN,F10,FABP1,FAP,FGF2,FOS,GATA4,GBX2,GJA1,GJA5,GRHL3,HSD17B3,HSD3B1,HSPB7,ID1,IGFBP5,IL6,INHBA,IRF6,JUN,KIT,KRT14,KRT17,LHCGR,MEF2C,MYC,MYH7,MYH9,MYL4,NKX2-5,NPPA,OGN,PLIN4,PPL,PTGDS,SCN3B,SPP1,STAR,TAGLN,TGM2,TPM1,TRIB2	503 (13)
ID1	-1.256	transcription regulator		0.822	0.000578	CCN2,CDKN1A,DTX1,EGR1,EOMES,FABP4,FN1,GAP43,GFI1B,ID1,IL9,KCTD1,LGALS3,MMP9,MYC,MYOD1,NGFR,PCGF2,PPARGC1A,RUNX2,SOX2,STRA6,TERT,TF,THBS1	820 (18)
STAT4	0.493	transcription regulator		0.818	0.000315	ACAP1,ARHGAP15,CCR5,DNAJB6,ENO2,ERRFI1,FCER1G,FYB1,GJA1,GRTP1,IL12RB1,IL12RB2,IL2RA,IL6,ING2,IRF1,IRF4,ITGA7,KCNK7,LPIN1,MATK,MGARP,MUC2,MYC,P4HA2,PCGF5,PKP2,RASL12,RGCC,RGS16,SMURF2,SOCS3,STK32C,SYPL1,TGFA,TGFB3,TWIST1,VLDLR	701 (14)
DTX1	-2.045	transcription regulator		0.816	0.0324	CD82,DUSP6,EGR1,LY6E,SPP1,TGFB2
CLOCK	0.316	transcription regulator		0.808	3.15e-09	ANGPTL4,BPHL,CCN2,CHST3,CYP26A1,DUSP8,EEF2K,EFHC1,FABP7,FAM107A,FGF1,GADD45B,GJA1,GNAO1,HAS2,HSPH1,ID1,IGFBP5,IHH,IKBKE,ITM2C,JAM3,JMJD6,KCND3,KCTD1,LPIN1,LYPD6,MAP2K3,MEST,MGP,MOXD1,MSMO1,MYLK,NEFM,NPAS2,PCGF5,PICALM,PRELID3B,PTAFR,PTPN14,RGS5,RSPH3,S100A11,SCN4B,SLC1A2,SLC20A1,SPATA6,ST3GAL5,THBS1,TNFRSF21,TRIL,WEE1,WNK4,WT1,ZDHHC20	572 (13)
FOXM1	-0.967	transcription regulator		0.803	0.0317	ACE,ACTA2,ANXA1,CD44,CDKN1A,CSF1,FN1,FOS,HEY2,IL6,ITGA5,ITGAV,JUN,LAMA4,MET,MMP9,MYC,MYCN,NFKB1,PDGFA,PTCH2,SFRP1,SOX2,STING1,TWIST1,TWIST2
TCF4	0.075	transcription regulator		0.784	0.00163	AEN,ANGPTL4,ARHGEF6,ASCL1,BNIP3,CADM1,CCL21,CD2,CD55,CDK6,CDKN1A,CREB3L2,CSF3R,DPT,EAF2,ECEL1,ENPP1,ENTPD1,EPCAM,EYA1,FAS,GRB14,HTR2B,ID2,IGFBP5,IL12B,IL15,IL6,IL9,INHBA,ITGB3,LAMA4,LMO2,MEF2B,MEF2C,MYC,NANOS1,NEDD9,NELL1,NGFR,PACSIN1,PPID,RHOC,RIPOR2,RRS1,RUNX2,SDC2,SERPINF1,SH3BP5,SOCS3,THPO,TMEM140	664 (13)
KLF4	3.208	transcription regulator		0.783	2.07e-12	ACTA2,ACTC1,AKR1E2,ALPL,ANGPT1,APCDD1,ASCL1,ATP2A2,CD44,CDKN1A,CEBPB,CLDN1,COL8A1,CSF1R,CYP17A1,CYP26A1,DLX3,DUSP1,DUSP4,DUSP5,EOMES,EPCAM,EPHA2,EYA1,FABP1,FN1,GATA4,GBX2,GDF15,GDF3,GRHL3,HBEGF,HEY2,HSPB1,IER5,IL15,IL6,INHBA,IRF6,IRX3,KLF4,KLF5,KRT13,KRT14,KRT17,MEF2C,MMP9,MRC1,MUC2,MYC,MYD88,MYH7,NPPA,PLAT,PPL,PRKG1,RUNX2,S100A14,SCARB1,SERPINB2,SOD3,SOX17,SOX2,TAGLN,TEAD1,TERT,TF,TFAP4,TGFB1,TG…	856 (19)
TCF20	-0.334	transcription regulator		0.775	0.000285	ANK1,CCDC141,CERK,CHN2,ETNPPL,GABRA5,MYC,NACC2,NCALD,PATJ,PLS3,RGS20,RSPO2,SCN4B,TSPAN13,WNT7B
HMGN1	-0.314	transcription regulator		0.762	0.0445	CBR3,CCL21,EGFL7,FOS,G0S2,TTR
CBFB	1.163	transcription regulator		0.762	0.00156	ACAN,AGPAT4,COCH,CSF1R,FABP4,IL2RA,ITGB6,KCNK5,MMP9,PIM1,RAB3IP,RUNX1,RUNX2,SLC25A19,SMURF2,SPP1,TNFRSF4,TWIST1	858 (19)
SNAI1	0.031	transcription regulator		0.759	8.9e-12	ACAN,ACTN1,ADIPOQ,ANKRD1,CCN1,CCN2,CD44,CD55,CDKN1A,CFL2,CHRDL2,CLDN1,CLDN11,COL6A2,ELF3,EPCAM,ESPN,FHIT,FLNB,FMNL2,FN1,FOS,FST,GDF15,GDF9,GSN,ID1,ITGA2,KRT17,LASP1,LIF,MMP9,RUNX2,SARDH,SDC1,SLC28A3,SOCS3,SOX2,TF,TGFB1,THY1,TMOD1,TP63,TPM1,TPM3,TWIST1,VILL,WASF3,WNT5B	985 (21)
SMARCA5	1.553	transcription regulator		0.73	1.73e-06	AEN,ALOX5AP,ANKRD6,ASS1,BLK,CACNA1E,CD44,CDKN1A,CORO2A,DTX1,ENC1,EPHA2,ESM1,FAS,GM2A,GPRC5B,GRIA3,IL12RB2,IL2RA,KIT,MAST4,MYL10,OSGIN1,PHLDA1,PLCG2,PRSS57,RAB44,SMOC1,UNC93B1,WDFY4	408 (10)
NANOG		transcription regulator		0.724	5.65e-05	BMPR1B,CDK6,CDKN1A,DCN,EGR1,EOMES,FOS,FST,GATA4,GBX2,GDF6,GSC,HOPX,HOXA1,ID1,ID2,IGF1R,IRF6,KLF4,MAP1B,MYC,MYCN,NKX2-3,PHACTR2,S100A6,SMURF2,SOX17,SOX2,TFAP4,TGFB2,TGFB3,THBS2,VSTM2A	834 (18)
CALR	-0.206	transcription regulator		0.701	0.00768	ATP2A2,CDKN1A,FN1,GJA1,GJA5,ITGA5,MEF2C,SCNN1G,TGFB1,TRDN,VCL	892 (22)
GATA6	0.101	transcription regulator		0.699	9.98e-07	ACTA2,ACTC1,AMH,AMHR2,AQP5,ASCL1,CDKN1A,CYP17A1,DLK1,DLX3,DPP4,EDN1,FGF2,GATA4,GBX2,GRHL3,HSD17B3,HSD3B1,IRF6,KLF2,KRT14,KRT17,LHCGR,LYVE1,MARCO,MEF2C,MRC1,MYC,MYH7,MYH9,MYLK,NFIA,NPPA,PPL,RBPJL,SOX17,SOX2,STAR,TAGLN,TGFB1,TGFB2,VSIG4,WNT2,WNT7B	756 (22)
HBP1	-0.223	transcription regulator		0.698	0.00414	CDKN1A,CTSB,MYCN,MYOD1,PDK4,PIM1	662 (11)
ARID1A	0.594	transcription regulator		0.688	3.91e-21	ACE,ACTA2,ACTN1,AK1,ALDH1A2,ALOX5,ALPL,ANXA1,ARID5B,ATG10,BGN,CA9,CAV2,CAV3,CBR3,CCN5,CD109,CD44,CD55,CDKN1A,CKB,CLIC3,COL12A1,COL16A1,CSF1,CSPG4,CSRP1,CSRP2,DISP2,DLX2,DUSP4,ECM1,EDIL3,EDN1,EEF1A2,EGR1,ENPP1,EPCAM,ESM1,F13A1,FGFBP1,FLNB,FMN2,FN1,FOS,FZD9,GABRA4,GDF15,GDF6,GRIN2B,GSC,GSN,HIBCH,HMGCR,HNMT,HOXB5,HSPB1,HTR2B,ID2,IL17RD,IL18,INHBA,IRF1,ITGA5,ITGA6,ITGA7,ITGA8,JUN,KIT,KLF4,KRT14,KRT17…	979 (20)
HEY2	4.182	transcription regulator		0.681	3.84e-07	ACTA2,ALPL,ANKRD1,GATA4,GJA5,HEY2,IL6,MYH7,MYL4,NKX2-5,NPPA,PROX1,SLN,TAGLN,TBX5,XCL1	518 (12)
MEF2A	-0.009	transcription regulator		0.658	3.87e-07	ACTC1,AQP4,ATP2A2,BDNF,CHRDL2,CLIC6,DPF3,EDN1,FOS,GATA4,IKZF1,IL12B,IL15,IRF1,ITGA7,JUN,KLF2,NPPA,NR4A1,PPARGC1A,STAR,TGFB1,TGFB2,TGFB3	839 (20)
ZEB2	-0.183	transcription regulator		0.645	0.0164	ALPL,CDK6,CDKN1A,CX3CR1,ESRP2,GBX2,ID2,INPP5D,MMP1,MYB,MYC,PLCG2,SFRP1,TERT
LHX2		transcription regulator		0.64	0.0445	BDNF,EDN2,FGF1,LIF,NCAM2,RARRES2
HOXC6		transcription regulator		0.632	0.00035	BCO2,CNTN1,DCN,ERRFI1,PAK1,PDE4DIP,PLXDC1,RFLNA,RUNX1,SLC1A3,TNFAIP8,ZNF536
ELL2	-0.285	transcription regulator		0.632	0.0151	CREB3L2,CYP26A1,EAF2,ENTPD1,FNDC3B,HOXA1,IRF4,ITM2C,MYC,RAPGEF3,SDC1
MNT	0.468	transcription regulator		0.632	0.0151	BNIP3,CD36,COQ8A,CYBB,FGG,GADD45B,ID1,KLF6,LEPR,MYC,TERT
BHLHE40	1.171	transcription regulator		0.624	2.88e-15	ACTA2,ACTN1,AFF3,ALOX5,ANXA1,ATF3,ATP2A2,BCL10,BDNF,BTG1,CALCA,CCR7,CD47,CD74,CD82,CNP,CNTN1,CTSS,CYBB,CYP3A4,DMBT1,ECM1,ENO2,EOMES,FAS,FGL2,GLRX,HBEGF,HCLS1,HEXA,HOMER1,ID1,IL12RB1,IL12RB2,IL2RA,IL2RG,IL6,IL6R,INHBA,IRF5,ITGA6,JMJD6,KCNA3,KIT,LCP2,LIF,LPAR1,MAFF,MARCO,MEF2C,MET,MLH1,MMP9,MTHFD2,MYB,MYOD1,NTRK3,PARP9,PFKFB3,PHLDA1,PNRC1,PROCR,PTPN6,RASGRP1,RGS16,RND3,SAMHD1,SAP30,SDC4,SGMS2,SLC1A…	904 (16)
MECP2	0.328	transcription regulator		0.62	5.35e-07	ACTA2,ACTB,ADAM12,ANK1,ANXA1,BDNF,CCDC141,CDH8,CERK,CHN2,DOCK8,DPP4,EFNA5,EGR1,ETNPPL,GABRA5,IL6,INA,IVD,KCNF1,MRC1,MYC,NACC2,NAV3,NCALD,NEFM,NR4A1,PATJ,PCDH15,PLAAT1,PLP1,PLS3,RGS20,RSPO2,SCN4B,SLC1A2,SOCS3,SYT2,SYT4,TSPAN13,WNT5A,WNT6,WNT7B	800 (18)
CERS2	0.896	transcription regulator		0.592	0.00414	CDKN1A,CERS4,CERS6,IL12B,IL6,SMPD3	851 (19)
POU2F2		transcription regulator		0.581	1.79e-06	ALOX5,CCR5,CD79B,CFLAR,COCH,DIXDC1,EIF2S2,FCRL4,FRMD4A,IL6,JUN,LY6E,MOCOS,MYC,PFKFB3,PTPN6,SPI1,SPP1,SSTR2,SYDE2,TERT,TGFA,TIMP2,TNFRSF21,VIP	281 (7)
PLAGL1	-0.282	transcription regulator		0.577	0.00846	ANGPTL4,CDKN1A,COL6A2,FABP1,FABP4,RASGRF1,SORD,TGFB1	817 (12)
EZH2	0.37	transcription regulator		0.577	2.22e-12	AADAT,ACKR3,ACTB,ALOX5AP,ALPL,AREG,ARHGDIB,ATF3,BGN,BMPR1B,CA2,CA5A,CACNA1E,CADPS,CD55,CD82,CDK6,CDKN1A,CEBPB,CRISPLD2,CSF1,CSF3R,DUSP5,EGR1,ELOVL1,ENPP2,EOMES,FGF13,FN1,GADD45B,GATA4,GATA5,GBX2,GDF15,HABP4,HMGA2,HOXA1,HOXB5,ID1,IFI27L2,IGF1R,IKZF1,IL12B,IL12RB2,IL6,IL6R,KIT,KLF2,KLF4,KRAS,LAMC2,LATS2,LY6E,LYPD6B,MLH1,MMP9,MYC,MYOD1,NGFR,NIBAN1,NKX2-3,NME1,NME5,NOX4,NTRK2,PARP9,PDGFA,PDGFB,PDGFC,…	932 (24)
PML	-0.459	transcription regulator		0.577	0.0206	ACACB,ADIPOQ,APOA1,CDKN1A,CIT,DNAJA4,DNAJB4,DNAJB6,DRC1,FABP1,FAS,FTL,HMGCR,HSD17B7,HSPB1,ID2,IFI35,LIPE,MAF,MAFF,PDK4,PIK3CB,PPARGC1A,PRKCH
PER1		transcription regulator		0.57	0.0368	CYP17A1,HSD17B3,HSD3B1,IHH,SLC7A11,STAR,WNK4
TRIM24	-0.033	transcription regulator		0.556	0.00543	ANGPT1,ANXA1,CA2,CALB1,CMPK2,CSRP1,DACT2,EMB,FLRT3,ID1,IFI27L2,IFI35,IRF1,LGALS3,MOV10,MYB,NPAS3,NRARP,PACSIN3,PRPS2,S100A11,SAMHD1,SPP1,TLR2	767 (16)
IRF2	0.485	transcription regulator		0.547	0.000647	C1QTNF1,C1S,CDKN1A,CIDEC,CTSS,CYP4F11,DNAJB6,DUSP5,FGG,ID1,IFI35,IL12B,IL12RB2,IL6,IRF1,KLF4,LBP,MYH9,PFKFB3,PTGR1,SDC1,SLC7A1,SLCO2B1,TLR4,TPM1	804 (18)
HAND1	-1.016	transcription regulator		0.533	0.000221	ANGPT1,ARC,CHRDL2,EDN1,EFNB2,FABP4,HKDC1,KIT,LIPE,NPPA,OSR1,PITX1,XCL1
FHL2	-2.74	transcription regulator		0.523	0.00113	ACTA2,AMH,APC,BMPR1B,CD44,CTSD,FHL2,GDF6,IL12B,JUN,MAP2K3,MYC,NPPA,NR4A1,PAK1,PARD6B,PIK3CB,PIK3R3,PRKCI,SPP1,TAGLN,TEAD1,TGFB1,TGFB2,TGFB3,WNT5A	770 (18)
POU5F1		transcription regulator		0.516	3.01e-12	ACKR3,ANGPT1,APCDD1,ASCL1,BAG3,BCL10,BNIP3,BTG1,CASP10,CDKN1A,CIDEA,CTSA,CTSB,CTSD,CYP26A1,DAPK1,DLX3,DNMT3B,DUSP1,DUSP4,DUSP5,EOMES,EPCAM,EPHA2,FABP1,FAS,FBXO15,GAA,GATA4,GBX2,GDF3,GM2A,GRHL3,GSC,HEXA,HOPX,IER5,IGF1R,IGF2BP1,IL6,INHBA,IRF6,IRX3,KLF2,KLF4,KRT14,KRT17,MEF2C,MMP9,MYC,MYCN,NKX2-3,NR0B1,PCSK6,PDCD1LG2,PFKM,PPL,PSAP,SIRPA,SLC11A1,SLC27A4,SOCS3,SOX17,SOX2,SPP1,SRC,TEAD1,TERT,TF,TFAP4,T…	1031 (21)
QKI	0.961	transcription regulator		0.502	2.64e-05	ANKRD1,ATP6V0D2,CD36,CDK6,CDKN1A,CHGB,CSF1R,CTSS,FABP7,FN1,GPHN,HMGCR,HSD17B7,ID1,MAP1B,MFAP5,MSMO1,MYH7,MYOZ2,NOS1,PPARGC1A,PTPRO,SOX2,TAGLN,TNC	928 (21)
SATB1	-1.605	transcription regulator		0.481	3.09e-06	ACTN1,ADCY3,APC,BORCS6,CCN2,CDKN1A,CSF3R,CTSD,CYBB,DCP1A,DUSP4,GADD45B,GATA5,GDF15,GLRX,GNG4,HELZ2,HSP90AA1,HSPA8,IKZF1,IL2RA,KLF2,MAF,MAL,NIBAN1,NR4A2,NUP153,PIK3IP1,PRKCB,RIPOR2,RUNX1,SPI1,TAF4B,TGFA,TRPS1,UHRF1	757 (11)
EP300	0.562	transcription regulator		0.481	9.16e-18	ACACB,ACHE,ACTA2,ADAM12,ADIPOQ,AMHR2,ANGPT1,AQP11,AQP5,ARID5A,BMF,BTK,CA2,CAV3,CCR7,CD36,CDKN1A,CFLAR,CKB,CORO2B,CRIM1,CRISPLD2,DIO1,DNAJB4,DTX1,DUSP1,DUSP4,EDN1,EGR1,EGR2,ENO2,EVL,EYA2,FABP4,FMNL2,FN1,FNDC3B,FOS,FOSL2,FRMD4A,FTH1,GM2A,HMGCR,ID1,ID2,IGF1R,IL12RB1,IL2RA,IL6,IL9,IRF6,ITGA6,ITGA9,ITGB2,JUN,KCTD1,KRT14,LAMC2,MAF,MCF2L,MEF2C,MET,MMP1,MMP9,MRC1,MYC,MYO1F,NPAS2,NPPA,NR4A1,NTRK3,PDCD1LG2…	879 (17)
STAT5A	-0.589	transcription regulator		0.476	1.14e-06	ADIPOQ,AGR2,CALU,CCR7,CD36,CD74,CD82,CDK6,CDKN1A,CEBPB,CFLAR,CISH,CSF1R,DUSP5,EMILIN2,EMP1,EOMES,FABP4,FAS,FCER1G,FGFBP1,FOS,FOSL2,GASK1B,GCHFR,GRHL3,HOXB6,ID1,ID2,IL12RB2,IL2RA,IL6,IL6R,IL9,IRF4,KIT,KSR1,LHFPL2,MAF,MMP9,MPEG1,MRC1,MYC,MYH7,NR4A2,NR4A3,PCP4,PIM1,PPFIBP2,PPP1R15B,RUNX2,SELENBP1,SH3GL2,SLC34A2,SLCO2B1,SNTB1,SOCS3,TAGLN2,TNFRSF4,TNFRSF6B,TPM3,TRAF3,TRAF4,TSPAN13,TUBA1A	963 (21)
PRDM5	-0.63	transcription regulator		0.447	1.04e-05	CD99,CDC42EP4,COL19A1,EDNRA,ENO2,EVL,GADD45B,ID2,IL6R,INSYN1,ISLR,MYB,MYC,MYD88,MYOM2,RUNX1,RUNX2,SOCS3,SOX2,STK32C,TINAGL1,ZFPM1
FOXA2		transcription regulator		0.443	2.6e-17	A2M,ABCC3,ABCC8,ACACB,ACOX2,ACSL6,ACSS2,ACTA2,ACTC1,ACTG2,ADCY5,AGR2,ALDH1A2,ALDOB,ALOX5,ANGPTL4,APOA1,APOC3,ARID5B,ASS1,ASTN1,C2CD4A,CCL17,CCNO,CD36,CD55,CDKN1A,CNTN1,COL11A1,CTHRC1,CYB561,CYP26A1,CYP3A4,DCN,DCX,DDIT4,DLK1,DYNLRB2,EHF,ENTPD3,EPCAM,ESPN,ESYT3,FABP1,FABP3,FABP5,FBP1,FGF19,G6PC2,GAN,GATA4,GFRA4,HKDC1,HMGA2,HOXA1,IGFBP5,IL6,INHBA,KRT17,LIPE,MAFB,MAP1B,MLF1,MMP1,MMP9,MUC2,MYL4,NOTO,N…	916 (20)
PRDM16	-0.879	transcription regulator		0.433	8.65e-05	ADAM12,ANKS1B,ANXA5,BLK,CALB1,CCN1,CCN2,CCR2,CDKN1A,CIDEA,DCN,GALNTL6,MAF,MYH7,MYOD1,NPPA,PPARGC1A,PPRC1,TENM4	952 (18)
NFKBIA	0.55	transcription regulator		0.422	5.23e-12	A2M,ACKR3,AMPD3,ANKRD1,APOA1,BNIP3,CCL21,CD44,CD74,CD82,CDH13,CDKN1A,CEBPB,CFLAR,CRYAB,CSF1,CTSB,DCN,DUSP6,ENPP2,EOMES,ESM1,FAS,FGF2,FHL2,FN1,FOS,GADD45B,GM2A,HMGA1,HOXB2,HOXB5,HSPA8,ID1,IL15,IL2RA,IL6,IRF1,IRX3,ITGA2,ITGAV,JUN,KCNH2,KLF5,LIF,LRIG1,LY6E,MATK,MGP,MMP1,MMP9,MSC,MUC2,MXD4,MYC,MYOD1,NFKB1,NPPA,NR4A1,OGN,PDGFA,PDLIM1,PICALM,PIM1,PLAT,POLR1C,RGS16,RGS3,RGS4,SDC1,SDC4,SERPINB2,SFRP1,SH3…	803 (13)
TBX3	-0.597	transcription regulator		0.421	1.72e-10	ABCC8,ADA2,ADAM33,ADAMTS2,AGTR1,AK5,ANGPT1,ASS1,CD36,COL6A2,DCN,DUSP10,E2F7,EDN1,EDNRA,EFNA5,EGR1,FGF12,GJA1,GJA5,GJC2,GRIA3,HACD4,HCN1,HCN4,ID1,IL12RB1,IL2RA,IL2RG,INPP5F,ITGB3,KCNJ3,KCNJ8,LBH,LPAR1,MMP9,MYC,MYLK,NPPA,PROX1,RTN4,RUNX2,SCARB1,SERPINF1,SGO2,SHOX2,SOX2,SYNJ2,TBX18,TGFB2,TNC,TWIST1,WNT5A	483 (13)
MED12	0.262	transcription regulator		0.421	7.99e-05	ANKRD1,ASCL1,CREB5,EGR2,GDF15,GJB3,LIF,MYC,SLC16A6,TMPRSS2	476 (11)
PPRC1	2.107	transcription regulator		0.412	0.000175	AADAC,ALOX5AP,CLDN1,DDIT4,DUSP5,ERRFI1,ESM1,FBXL13,GDF15,PHLDA1,RND3,SMYD1,VIP
RELA		transcription regulator		0.399	9.06e-11	A2M,ACTA2,ADAMTS4,ALOX5AP,ALPK2,ANKRD1,ARHGDIB,BCL10,BLVRA,CCN2,CCR7,CD44,CDKN1A,CEBPB,CRYAB,CTSB,CYBB,CYP17A1,CYP3A4,DGCR6,DNMT3B,DOCK8,DUSP1,EDN1,EGR1,EHF,ELF3,EOMES,EPCAM,FAS,FGF10,FGF2,FMN2,FN1,FOS,GDF15,GSTA2,HAS2,ID1,IGF1R,IGFBP2,IKBKE,IL12B,IL15,IL2RA,IL6,IL9,IRF1,IRF4,JUN,KIT,LUM,MMP1,MMP9,MYB,MYC,MYOD1,NFKB1,NGFR,NOX5,NR4A1,NR4A2,NR4A3,PDGFB,PFKM,PLD1,PLK3,PTGDS,PTPN6,RUNX2,S100A6,SDC4,S…	689 (12)
BMI1	0.999	transcription regulator		0.396	7.29e-07	BLK,BNIP3,CADM1,CD44,CDK6,CDKN1A,CSF1,CSF3R,CYFIP2,FAS,GADD45B,GATA4,GFRA2,HMGA2,HOXA1,HOXA2,HOXB5,HOXB6,IL12B,IL12RB1,IL17RD,IL6,MAF,MET,MYC,NFKB1,NGFR,NPPA,PARP9,RASSF9,SAP30,SCN4B,SFN,TERT,TGFB2,TUSC3,WNT5A	867 (21)
MAML1	0.576	transcription regulator		0.391	0.02	DTX1,EGR1,HEY2,MYLK,RND3
STAT5B		transcription regulator		0.389	2.04e-14	A2M,ACSL6,ACTC1,ANKRD1,ANKS1B,ATP2A2,BMF,CA2,CCDC141,CCR7,CD74,CD82,CDK6,CDKN1A,CFLAR,CIDEA,CISH,CKMT2,CORIN,CSF1R,CSRP3,CUX2,CYP17A1,DAPK1,DUSP1,FAS,FMN2,FOS,FOSL2,G0S2,GADD45B,GPX7,HEXA,ID2,IL2RA,IL6,IL9,IRF1,IRF4,JUN,JUND,KIF9,KSR1,LIMD2,LMO2,LY6E,MAF,MB,MMP9,MMRN1,MORN3,MOXD1,MPL,MRC1,MYBPHL,MYC,MYCN,MYH7,MYL4,NIBAN2,NOX4,NPPA,NR4A2,NR4A3,PDK4,PIK3IP1,PIM1,PPP1R3C,PROCR,RAD51B,RASD1,SH3RF3,SL…	847 (17)
GBX2	3.139	transcription regulator		0.382	3.06e-06	EGR2,ENPP2,FGF12,GBX2,HOXA2,IL1RAP,KLF4,MAFB,PCDH15,PLXNA4,RTN1,SYT2,TGFA,TNFRSF21,ULK4,VCL
HIC1	0.248	transcription regulator		0.371	8.72e-05	ABHD3,ACKR3,ACTA2,CA2,CDKN1A,CXCL14,EPHA2,FHL2,FST,INHBA,LIF,LRP8,MAP2K3,SLC7A11,SPP1,TNFAIP8	814 (16)
TGFB1I1		transcription regulator		0.36	0.000234	CD36,CDKN1A,CIDEC,FABP1,FN1,FOS,ID1,KLF4,NOX4	877 (24)
NFATC2	0.573	transcription regulator		0.352	2.48e-10	ACP5,AQP5,CCL17,CCR7,CDKN1A,CFLAR,CISH,CMPK2,CRYAB,CSF1R,CX3CR1,EDN1,EGR2,EGR3,ENPP2,FAS,FGL2,HELZ2,IKZF1,IL12B,IL12RB2,IL15,IL18,IL2RA,IL6,IL9,INHBA,IRF1,IRF4,IRF5,JUN,MAF,MYC,NFKB1,NGFR,NOX4,NR4A1,PDZD2,PLAT,PLD1,PMEL,PPARGC1A,RGS2,SH3BP5,SLCO3A1,SOCS3,SRC,TERT,TGFB1,TLR2,USP25	921 (18)
PRRX1	-0.428	transcription regulator		0.325	0.0017	ANGPT2,FGF1,FOS,PAX9,PDGFB,SOX2,TGFB1,TNC	813 (12)
DLX5	0.887	transcription regulator		0.323	0.0382	CYP26A1,FOXL2,GBX2,GSC,RGS5,RUNX2
POU4F1		transcription regulator		0.295	1.58e-06	ACTC1,ADCYAP1,AJAP1,BNC1,CACNB3,CDKN1A,CLIC6,CRABP1,DAB1,EYA1,FGF13,GBX2,HOXB5,INA,IRX3,KCNIP1,MSC,NR4A2,NTRK2,NTRK3,PIEZO2,RBM24,RTN4RL2,RUNX1,SSTR4,TAC1,VSTM2A
PIAS1	-0.195	transcription regulator		0.29	2.11e-05	ACTA2,APBA2,BDNF,CACNB3,CDH8,CDKN1A,CYP17A1,DNM1,GABRA3,GABRA5,GRM4,GUCY1A1,KLF2,KLF5,LRP8,MYC,NPPA,PAK1,SNCA,TAGLN	925 (18)
SNAI2	-0.237	transcription regulator		0.257	0.000188	ACAN,ANKRD1,CCN1,CCN2,CD44,CDKN1A,CLDN1,DUSP6,ECM1,EGR2,ELF3,EPCAM,FN1,KLF4,MEF2C,MMP9,MYC,MYH7,MYOD1,MYOM3,RUNX2,SOX2,TAGLN,TP63,TRPS1,TWIST2	770 (22)
TFAP2B	-0.883	transcription regulator		0.254	0.0304	COL8A2,EDN1,HOXA2,IL12B,IL15,IL18,KIT,TERT
MTDH	0.368	transcription regulator		0.254	1.06e-08	ACTA2,ACTB,ACTC1,ACTN1,ALDOB,ANGPT1,ANGPTL4,ANXA2,CCN2,CD36,CDKN1A,CFH,CIDEC,CSRP1,CYFIP2,CYP26A1,DIO1,EFNB2,EGR1,FABP1,FGF1,FGG,GSN,HOXA1,IGFBP2,ITGB6,LGALS3,LPIN1,MMP9,MSMO1,MSN,NOX4,PHLDA1,PLIN4,PLIN5,PLS3,PTGDS,SLC1A2,SPP1,THBS1,TWIST1	879 (20)
ATF2	-0.01	transcription regulator		0.249	8.29e-08	ACTB,APOC3,ASNS,ATF3,BDNF,CCL26,COL24A1,CYBB,DMBT1,DUSP1,DUSP10,DUSP5,DUSP8,EGR1,ENTPD1,FN1,FOS,IL6,JUN,MMP1,MYH7,MYLK,NPPA,PPARGC1A,RHOB,TF,TGFB2,TSHR	933 (16)
TWIST2	-2.762	transcription regulator		0.239	4.81e-08	BIN1,CD44,CDKN1A,CHRDL1,DUSP5,DUSP6,FBLN5,FN1,KLF6,MAF,MMP9,MYCN,OSGIN1,PPARGC1A,PRKAA2,SOX2,TERT,TGFB1,TWIST1	483 (14)
GABPA	0.364	transcription regulator		0.218	0.0328	ACHE,DCLRE1C,FAS,IL18,ITGB2,RRAS,SLC7A11,SOD3,SPI1,TERT,TNC,TSHR
NOTCH4		transcription regulator		0.213	1.34e-05	ACTA2,ANGPT1,DES,EFNB2,HEY2,IL12B,IL2RA,IL6,IRF1,MET,PRAG1,RGS5,TAGLN	556 (14)
ZBTB10	0.276	transcription regulator		0.209	0.0189	ADAM8,AGO3,ANXA1,ARID5A,CCR7,CYBB,FCER1G,IFI27L2,IL12B,IL15,IL2RA,IL6,IRF1,IRF4,MYD88,NKRF,NR4A3,PARP9,SAMHD1,STING1,TNFSF15,TRAF3IP2,UNC93B1
DDIT3		transcription regulator		0.204	0.00468	ANKRD1,ASNS,ATF3,CFLAR,FAP,FN1,IL12B,IL6,ITGA2,MLF1,MTHFD2,NPAS2,PLAT,PPARGC1A,RGS4,SH3RF3,SOX2,TENM4,TGFB2,TGM2,THBS2,TNFRSF10B	885 (18)
HOXA5	-1.145	transcription regulator		0.201	0.00014	CD44,CDKN1A,CLDN1,EGR1,FGF10,GADD45B,IHH,IL6,LIF,PTN,RUNX2,SOX2,TGFB1,TGFB3	600 (11)
PER2	-0.208	transcription regulator		0.18	0.0265	ATP1A1,CYP17A1,HSD17B3,HSD3B1,IHH,SLC7A11,STAR,TWIST1
FOXD3	1.041	transcription regulator		0.179	0.0333	CDKN1A,KIT,RND3,SOX2
HDAC9	0.033	transcription regulator		0.174	0.0138	JUN,KLF2,MYH7,NPPA,NR4A1,RGS2,TGFB1
MED13	0.791	transcription regulator		0.164	0.025	ANKRD1,CD36,CIDEA,CIDEC,HMGCR,LIF,MYC,NR4A2,NTRK2
ATOH8	-0.85	transcription regulator		0.152	0.0191	CCN2,DCN,MAOB,TIMP3
CAVIN1	0.103	transcription regulator		0.152	0.0377	CDKN1A,IL6,LIPE,MEF2C,MYC
CREB3L3		transcription regulator		0.149	0.0234	CIDEC,CYP27A1,IGFBP2,INSIG1,LPIN1,RUNX2,SMURF1
JARID2	-0.586	transcription regulator		0.142	0.0182	CDKN1A,ENO2,INSIG1,KLF4,LPIN1,MYC,PLIN3,PPARGC1A,SOX2,TGFB1
SOX6	-0.781	transcription regulator		0.14	0.0445	ACAN,CDKN1A,MYC,MYH7B,RUNX2,SOCS3
SMAD6	-0.117	transcription regulator		0.138	0.00414	ACAN,DNMT3B,IL6,SPP1,TGFB1,TGFB3	875 (19)
ATF1	0.381	transcription regulator		0.137	0.00035	ATP1A1,CALCA,CEBPB,COL24A1,EGR1,FOS,FTH1,INHBA,JUN,REN,TEAD1,THBS1	507 (11)
GATA3	-0.441	transcription regulator		0.136	0.0013	ANGPTL4,ASCL1,BCAS3,BMF,CCR2,CCR5,CDKN1A,CSF1R,DLX3,DTX1,ELOVL1,EOMES,FN1,FOS,FTL,GFI1B,GRHL3,IL12RB2,IL2RA,IL6,IL9,IRF6,KIT,KLF4,KRT14,KRT17,MAF,MYC,NFKB1,NPPA,PPL,RGCC,RUNX1,SPI1,TGFB1,TGM2,TJP2,WNT11,ZFPM1	922 (22)
ZBTB20	-1.095	transcription regulator		0.136	0.000163	ACSS2,ANXA1,AQP4,CISH,CKMT2,CLIC6,DCN,EMILIN2,HSPB8,IGFBP2,IL6,KCNK5,KRT23,LEPR,NEDD9,PDK4,PPARGC1A,SOCS3	595 (13)
TBX1	-0.524	transcription regulator		0.132	0.0422	CDKN1A,FGF10,GBX2,PAX9
HOXC8	-0.891	transcription regulator		0.128	0.0368	ANKRD1,ASS1,EMB,REN,SERPINF1,SPP1,TAGLN
ZBTB33	0.321	transcription regulator		0.117	0.000688	CD47,CDKN1A,FAS,MYC,SIRPA,THBS1,TNFRSF10B	393 (4)
FOXP3		transcription regulator		0.114	2.54e-09	ANXA1,CCR2,CCR7,CD101,CDKN1A,CSF1,CYSLTR1,DUSP4,DUSP6,EGR1,ENTPD1,EOMES,FGL2,FOS,FOSL2,ID2,IGF1R,IGSF3,IL12RB2,IL2RA,IL6,IL6R,IL9,IRF4,JMY,JUN,KLF4,LATS2,LGALS3,MAF,MMP9,NFKB1,NR4A1,NR4A3,NTRK3,RUNX1,SATB1,SDC4,SLCO4A1,SOX2,TGFB1,TGM2,TNFRSF4,TTR,VIPR1	819 (16)
MYOG		transcription regulator		0.113	0.000399	ACACB,ACHE,CAV3,CDKN1A,FOS,MEF2C,MYL4,MYOD1,PDGFA,PRIMA1	411 (7)
TFCP2	0.559	transcription regulator		0.106	0.00737	A2M,CFH,MMP9,SPP1,TGFA,WT1
HOXA13	-0.677	transcription regulator		0.1	0.000176	EMP1,GJA1,GRHL3,HOXB6,IGF1R,IL6,NOG,SCEL,SHROOM3,SLC1A2,SOX2,VILL,WNT5A,WNT6
RUNX2	2.446	transcription regulator		0.086	4.06e-06	ACTA2,ALPL,CCR2,CDKN1A,COL11A1,COL24A1,DES,EDN1,FN1,GADD45B,GAMT,GDF10,IGF1R,IHH,ITGAV,LGALS3,LUM,MMP9,MYOD1,NUDT12,PIK3CB,PTGDS,RGCC,RUNX1,RUNX2,SPP1,ST3GAL5,TAGLN,TGFB1,TNFRSF11B,TPM1	783 (18)
SQSTM1	0.341	transcription regulator		0.082	0.00145	ABCC3,AOX1,ARID5A,EDN1,FGL2,HBEGF,IL12B,IL15,IL18,IL6,IRF1,JUN,MMP9,PLAT,RGCC,RTN4	473 (12)
MTA1	0.251	transcription regulator		0.08	0.036	ACKR3,ACTC1,BCAS3,CCN5,EMP1,EPHA2,MMP9,MYC,TWIST1
SIX1	0.224	transcription regulator		0.074	3.14e-10	ACTC1,AK1,CAV3,CD36,CDKN1A,CFD,CRYAB,CSRP3,DACH2,DES,ENC1,FABP3,FGF10,FN1,FST,HBEGF,HSPB8,ITGA7,KCNH2,KLF5,LDB3,MEF2C,MYL4,MYLK,MYO1C,MYOD1,MYOM2,MYOM3,REEP1,RTN1,SGCA,SGCD,SORBS1,TAGLN,THY1,TWIST2,VCL,WT1	801 (23)
IRF1	1.306	transcription regulator		0.066	0.000986	ACTA2,ADAM8,AGTR2,CD74,CDKN1A,CEBPB,CMPK2,CTSS,CYBB,FAS,FGL2,FN1,HELZ2,IFI35,IL12B,IL12RB1,IL12RB2,IL15,IL18,IL6,IRF1,IRF4,IRF5,KL,MMP9,MYB,MYC,NCF2,PDCD1LG2,PLAAT1,SAMHD1,SPI1,TERT,TGFB1,TMEM140	731 (16)
FOSB		transcription regulator		0.063	0.0063	BDNF,CEBPB,FOS,FTH1,INHBA,MMP1,MMP9,RUNX2,SERPINB2	907 (21)
CTCF	-0.138	transcription regulator		0.034	0.000861	ADRA2C,ANKRD52,APOA1,APOC3,ARC,BDNF,C1QL1,CCL17,CDKN1A,DRD1,EGR1,EOMES,ERRFI1,FST,GAL3ST1,GATA4,GBX2,IL12RB1,IL6,ITGA8,LIF,MUC2,MYC,MYCN,MYOD1,SLC7A11,TGFB3,TLR2	933 (22)
PAX6		transcription regulator		0.03	0.00154	ACP5,ASCL1,CAP1,CDH6,CDH8,CDK6,CRISPLD2,CRYAB,CUX2,DBX2,EEF2K,EFNB2,EOMES,FABP7,FGF19,G6PC2,GAA,HAS2,HELB,IRX3,MAF,MET,MMP9,MTCH1,PAFAH2,PCSK2,PLA2G15,SNCA,SOX2,STAR,THNSL1,TNC,TTC24	522 (9)
SREBF1	1.107	transcription regulator		0.015	0.000741	ACACB,ACSS2,ADIPOQ,APOC3,CAP2,CCL17,CD36,CDKN1A,CEBPB,CFD,CIDEA,COL6A1,CSRP1,CX3CR1,DLK1,FABP3,FABP4,FABP5,FABP7,FAS,FN1,HMGCR,IFI30,IL6,INSIG1,LGALS3,LPIN1,MEF2C,MIOX,MSMO1,MYOD1,NCF2,P4HA2,PIK3R3,PLS3,PTGDS,RETREG1,RNASET2,SCARB1,SLC20A1,SQLE,STAR,SV2A,TF,TGFB1	810 (20)
MAFA	-1.164	transcription regulator		0	8.11e-08	ABCC8,ADCY7,ALDOB,ANKRD1,AQP4,CACNA1E,CACNA1G,CCR7,CDKN1A,CHGA,CHGB,CHRNA4,CTSB,CYSLTR1,DLK1,EDAR,FGF2,G6PC2,HRH2,HTR2A,HTR7,ID2,IGFBP5,IL12B,IL6,LGALS3,MID1,MYLK,NGFR,NOS1,PCSK2,PLCB2,PTAFR,PTPRN,STEAP3,TNFRSF19,TTR,UCN3	637 (15)
ARID2	-0.217	transcription regulator		0	0.00218	ALPL,BLK,COL8A1,EFNB2,FOS,HTR7,KIRREL3,MEF2C,PTPRN,SCG2,THBS1,WNT5A
NEUROG2		transcription regulator		0	0.0198	ASCL1,CDK5R1,DCX,DOCK8,HOXA1,IKZF1,IRX3,NOG
PIAS4	0.138	transcription regulator		0	0.0119	FABP1,IL12B,IRF1,PCDH9,PDK4
ESX1		transcription regulator		0	0.000648	BNC2,CMKLR1,CYP26A1,DUSP10,ELF3,FGF13,HMGA2,IGFBP5,KRAS,LGALS3,SPP1,TIMP3,WNT11
NCOA4	0.03	transcription regulator		0	0.0265	AKR1B1,CCN2,EHF,FABP5,FTH1,FTL,GATA4,IL6
HEY1	-0.059	transcription regulator		-0.005	0.0368	ACTA2,CDKN1A,GATA4,MMP9,NPPA,PROX1,TAGLN
SMARCB1	0.114	transcription regulator		-0.024	1.64e-06	ASCL1,BAG3,BASP1,BNIP3,BTG1,CA5A,CD44,CDKN1A,COL14A1,CSF1,DAPK1,DOCK8,F10,FABP4,FAS,FBP1,FOS,GAP43,GJA1,GSN,HBEGF,HOXA1,IGFBP2,IL12B,JUN,JUND,LBP,MLH1,MMP1,MYC,NAT10,NKX3-2,NOG,PDGFB,PFKFB1,PPP1R3C,PTN,RAB3B,RFC5,RND3,SMC4,TMOD1,TUBB2A,WASF3	881 (20)
TP73	-0.683	transcription regulator		-0.025	4.62e-12	ACTA2,ADGRB1,AEN,ANGPTL4,AQP5,ARHGAP22,ATF3,ATG10,BGN,CADM1,CCN1,CCN5,CCR7,CD55,CD82,CDH10,CDH22,CDK6,CDKN1A,CLDN1,CNTFR,CRYAB,CTSD,DAB1,DDIT4,DES,DRAM1,ECM1,EDN1,EGR1,EPHA2,FAS,FGF2,FN1,FST,G0S2,GJA1,GLS2,GPR137B,GSN,HBEGF,HSPB8,HTATIP2,ID2,IGF1R,IGFBP5,IGSF3,IL6,INPP5D,IRF5,ITGA5,ITGA6,ITGB2,KIT,KLF5,KRAS,LASP1,LBH,LCP1,MLH1,MYC,MYCN,MYH9,MYOD1,MYOZ2,NFKB1,PARVG,PDGFA,PDGFB,PDLIM1,PIEZO2,PIK3R3…	817 (15)
NKX2-3	1.227	transcription regulator		-0.031	4.2e-06	ACTA2,ADAP1,ALPL,ANGPT2,ANGPTL4,ARHGDIB,ASNS,BCHE,BTG1,CD300LG,CD36,CDKN1A,CERK,CMPK2,CRYAB,EDN1,F2RL1,FGF2,GASK1B,GDF15,HELZ2,HEY2,HSD17B2,KLF2,KLF4,LY6E,MCTP1,MMRN1,MYD88,PARP9,PIM3,PLD1,PRSS12,PSAT1,REEP1,SHOX2,SOX2,TMEM100,TNFAIP8L1,UACA,UNC5A,UNC93B1	516 (7)
SRA1	-0.281	transcription regulator		-0.045	5.58e-06	ADIPOQ,FABP4,LIPE,MMP1,MMP9,SLC2A12,STAR,TGFB2,THBS1,TMPRSS2	1049 (22)
SMAD1	-0.078	transcription regulator		-0.053	4.15e-06	ACTA2,ALPL,CCN2,CDKN1A,COCH,CSF1,GADD45B,ID1,IRF1,MYC,NKX2-5,PDGFA,PDGFB,RUNX2,SPP1,TBX20	932 (24)
TP63	-1.439	transcription regulator		-0.062	1.31e-33	ACTA2,ACTN1,ADA2,ADAMTS18,ADAMTS2,ADAMTS4,AEN,AGR2,APC,AREG,ARID5B,ATG10,CAPN11,CAPN2,CAPN6,CCN1,CCN2,CD47,CD82,CDK17,CDK6,CDKN1A,CFLAR,COL11A1,COL12A1,COL14A1,COL19A1,COL8A1,COL8A2,COL9A1,COL9A3,CORO2B,CRIM1,CRTAP,CRYAB,CTSD,CTSH,CTSK,CYGB,DCN,DDAH1,DDIT4,DIRAS2,DUSP10,DUSP6,ECM1,EDN1,EDN2,EGR1,EGR2,ELAVL2,EMILIN1,EMP1,EPHA2,FAS,FAT2,FBLN5,FGF1,FGF13,FMN1,FN1,FOS,FOSL2,FRMPD2,FST,FZD8,GLB1L2,GLS…	794 (14)
LMO2	-1.3	transcription regulator		-0.066	6.3e-08	ACOX2,ACTB,ANGPT1,ANXA1,ATP8A2,BTK,CCR2,CD79B,CDH13,CDKN1A,CERS4,CYFIP2,DLK1,DPP4,DUSP15,ENO2,FBP1,FNDC3B,FTH1,GJA1,GPRC5B,GSN,IL1RAP,IL2RA,ITM2C,KCTD17,KIT,LHFPL2,LMCD1,MAP3K5,MEF2C,MYC,PCBP3,PDZD2,PISD,PLCG2,PSTPIP1,RAB32,RASGRP1,RHOBTB3,RNPEP,RPS6KL1,SCARB2,SERPINF1,SKI,SLC5A9,SLIT1,SMOX,SPI1,SPRED1,TES,TGFB1,TGFB2,THY1,TLR2,TNFRSF10B,UNC93B1	595 (12)
DLX1		transcription regulator		-0.067	2.24e-08	AREG,CADM1,CAP2,CD44,CDH6,CTHRC1,EDIL3,ENO2,FGF13,FZD8,GBX2,GJA1,KIT,LOXL2,PCOLCE2,RGS4,SDC1,SMARCD3,SNTB1,SOX2,TERT,WNT5A,WNT7B
ELF4		transcription regulator		-0.078	3.38e-07	CA2,CCR7,CDKN1A,DLX3,DUSP1,DUSP5,GAP43,IL18,IL6,IRF4,KIT,KLF2,KLF4,LCP1,MAPKAPK3,NOX5,NTRK3,RBBP8NL,SPP1,SRC,SYT4,THPO	953 (19)
POU4F2		transcription regulator		-0.081	0.000688	ADAMTS15,ANGPTL4,CACNA1D,CACNA2D2,CALB1,CSF3R,DLX2,EBF3,GPR20,HSPA8,HSPH1,MMP9,MYBPC2,NPPA,NR4A2,PROX1,TRPM2,WT1
PAX3	0.083	transcription regulator		-0.104	3.89e-10	ANXA1,ARC,ARHGDIB,ASNS,ASS1,CDKN1A,CTSA,DBN1,DLX2,DNM1,EGR2,EYA2,F2RL1,FABP7,G0S2,GUCY1A1,HPX,ID2,IGFBP2,IL6,IL6R,LIPE,LRRC17,MDFI,MEOX1,MEST,MET,MGP,MMP9,MNX1,MYOD1,NEDD9,NMU,P2RY4,PCSK2,PITX1,PTPN12,PTPN14,RARRES2,RHOB,RLBP1,SFN,SNCA,TGFB2,TIMP3,TJP2,TNC,TSPAN7	663 (7)
HDAC7	0.266	transcription regulator		-0.105	7.99e-05	CD44,CDKN1A,EDN1,ETNPPL,IL12B,IL6,MMD2,NPPA,NR4A1,SLC1A2	680 (20)
SKIL	1.299	transcription regulator		-0.111	0.00104	ACTA2,ADAM12,CDKN1A,CPEB2,DIXDC1,GSC,SKIL,SLC16A6,SOX17,THBS2,TPM1,TPM3	858 (19)
BRCA1	-0.294	transcription regulator		-0.129	0.000232	ACTB,AK1,ANGPT1,AQP5,AREG,BCKDHB,CDKN1A,CTSD,CYP3A4,DDIT4,EGR1,ENPP2,FAS,FHIT,FHL2,GADD45B,GDF15,HMGA2,HSPB1,IGF1R,KIT,KRT17,LPIN1,MLH1,MYC,NEDD9,PHLDA1,POLR3E,SFN,TERT,TP63,TWIST1,WEE1	987 (22)
ISL1	-0.764	transcription regulator		-0.131	0.000278	A2M,ABCC8,ACTC1,ADCYAP1,AJAP1,BNC1,CLIC6,CRABP1,DAB1,EYA1,FGF13,GBX2,HOXB5,IL6,IRX3,NTRK2,NTRK3,PCSK2,PIEZO2,RBM24,RUNX1,VSTM2A
TCF7L2	0.293	transcription regulator		-0.139	2.22e-17	ADAMTS4,AGO3,ALDH1A2,ALOX5,AMHR2,ANXA1,APCDD1,APOD,AQP9,ARHGDIB,ARHGEF26,BIN1,CAP1,CCDC3,CCN2,CCN5,CD44,CDKN1A,CLDN11,CNP,CREB3L2,CREB5,CSF3R,CSRP1,DBNDD2,DUSP15,EDN1,ELOVL1,ENC1,ENPP2,EPCAM,FABP1,FABP4,FBP1,FBP2,FGF1,FGF19,FMNL2,FN1,FOS,FRMD4A,FTH1,GJC2,GSN,GSS,HSPA2,ID1,ID2,IGF2BP1,IGFBP2,IHH,IL12RB1,IL1RAP,JAM3,JUN,KCNJ3,KNDC1,LAMC2,LBH,LRRN1,MAL,MDH1B,MET,MMP1,MOBP,MUC2,MYB,MYC,NFASC,NINJ2,PE…	906 (21)
ZFP36		transcription regulator		-0.15	0.00416	ABCG4,CA2,CD36,CDKN1A,CTSS,CYBB,FOS,IL12B,IL6,IRF1,JUN,LATS2,LMO2,MMP1,PIM1,PNRC1,SPP1,TLCD4,TLR4	504 (16)
WBP2	0.592	transcription regulator		-0.15	0.0446	ALPK2,BMF,CSPG4,EGR1,GGT5,HAS2,HNMT,ISYNA1,ITGB3,JUN,LIPG,OSCP1,PI16,PIERCE1,RARRES2,SLAMF8,SLC1A3,SLC7A11,TAGLN
EGR4	3.702	transcription regulator		-0.152	0.00363	CYP17A1,EGR1,EGR2,MYBL1
TCF7	-0.611	transcription regulator		-0.157	7.03e-12	ANXA1,ARHGDIB,ARHGEF26,ARRDC4,BLK,CAPN3,CCDC3,CCR2,CD101,CD79B,CDKN1A,CERK,CISH,CX3CR1,DGKH,DTX1,ECM1,EGR2,EGR3,EMILIN2,ENO2,ENPP2,EOMES,FOS,G0S2,GM2A,GNAO1,ID2,IGF1R,IL12RB2,IL2RA,IL6,INPP5D,INPP5F,IRF4,JUN,KCNB1,KCNJ3,KIT,KLF6,LONRF1,LPCAT2,LRIG1,MAF,MET,MMP9,MSMO1,MYD88,MYZAP,NFKB1,NTN4,OSBPL3,OSBPL5,PDGFB,PHLDA1,PIK3R6,PKIB,PLA2G7,PLCXD1,PPM1L,PRG4,PRKCB,PSAP,PTPRO,RBPMS,RUNX2,SDC1,SDC2,SH3GL…	970 (25)
ARID4B	0.764	transcription regulator		-0.164	0.00485	DNAJA4,EMB,FUCA2,HOXB5,HOXB6,HTATIP2,LRRC17,PTGDS,SPINK5,TINAGL1,TWIST1
STAT1	-0.595	transcription regulator		-0.167	9.24e-07	A2M,ACE,ANGPT2,APOA1,BTG1,C1R,C1S,CCN2,CCR2,CCR7,CD44,CDKN1A,CMPK2,CSF3R,CTSS,CX3CR1,DPP4,EDN1,EGR1,FAS,FCER1G,FGF2,FGL2,FN1,FOS,GRIN2B,HBEGF,IFI30,IFI35,IGF1R,IL12B,IL12RB2,IL15,IL18,IL6,IRF1,IRF5,ITGA2,ITGA5,JUN,KLF4,KRT17,LIF,LY6E,LY96,MMP9,MYC,MYD88,MYH7,NFKB1,NOX4,NOX5,NPPA,PARP9,PDCD1LG2,PDGFA,PDGFB,PDGFC,PIM1,PTN,RUNX1,S100A10,SAMHD1,SLAMF8,SOCS3,STING1,TGFA,TGFB1,TGFB2,TLR4,TNC,TNFRSF10B,…	824 (15)
FOSL2	3.434	transcription regulator		-0.169	0.00916	BDNF,CCR2,CEBPB,FAS,FN1,IL6,LUM,MMP1,MYOD1,RUNX2,S100A11,SERPINB2,SPP1	870 (18)
NRL		transcription regulator		-0.186	0.016	ARR3,CNGA3,GNGT2,GRB14,GUCA1B,IGF1R,MEF2C,PDE6H,RTN4,SRC
SOX8	1.131	transcription regulator		-0.218	0.00441	AMH,DLK1,PHEX,PLP1,RUNX2	408 (7)
HOXB5	-2.686	transcription regulator		-0.218	0.00939	ANGPT2,ITGAV,ITGB3,MMP1
MEIS1	-0.674	transcription regulator		-0.218	0.000214	ASCL1,CDKN1A,DLK1,EYA1,FOS,HOXA2,HOXB2,IRX3,MYB,RUNX2,TRIB2,XCL1	206 (5)
SOX1	-0.441	transcription regulator		-0.229	2.72e-05	ANGPT1,APCDD1,CYP26A1,DUSP1,DUSP4,DUSP5,EOMES,EPHA2,FABP1,GDF3,IER5,INHBA,IRX3,SOX17,TEAD1,TGFB2,TNFRSF19,TWIST2,WNT5A
IKZF3		transcription regulator		-0.245	0.0298	ALOX5,ANTXR1,CAV2,DNM3,FN1,HHATL,KLF4,LHFPL2,MAN1C1,MYC,OTUD1,TLR4
FOXA1	-0.999	transcription regulator		-0.262	2.01e-08	ACKR3,ACTA2,ACTC1,ACTG2,AGR2,ANXA1,ASTN1,BTG1,CDKN1A,CPS1,DCX,DDIT4,DPYSL4,DUSP1,EDN2,ENO2,EPB41L3,FMN1,FNDC3B,FOSL2,GFRA4,IDS,IL6,JUN,LAMC2,MGP,MND1,MUC2,MYC,MYH9,NOTO,NR4A2,P4HA2,PFKFB1,PFKFB3,PISD,PNRC1,PPP1R14C,PTPN14,SDC2,SDC4,SELENBP1,SLC6A15,TAGLN,TAGLN2,TF,TGFB3,TMPRSS2,TRIM2,TTR,VLDLR,WNT7B	1082 (22)
SIRT1	-0.432	transcription regulator		-0.277	2.64e-07	ABCC2,ACAN,ACAP1,ACOX3,ACTA2,ACTB,ADIPOQ,AQP11,BDNF,BNIP3,CD36,CD74,CD79B,CDKN1A,CEBPB,CFLAR,CMPK2,EIF2S2,ENTPD8,FABP4,FAS,FGF10,FN1,FTH1,GATA4,GATA5,GK2,HELZ2,HMGCR,HSP90AA1,ID1,IGF1R,IL12B,IL2RG,IL6,ITPKA,KIF5C,KLF2,LAMA4,LAPTM5,LGALS3,LMTK2,LY6E,MAF,MAOA,MEF2C,MLH1,MMP1,MMP9,MYC,NCAM2,NTRK2,PCSK2,PDK4,PHKB,PLEKHA6,PPARGC1A,PRKCI,PTN,RBPJL,RGS16,RUNX2,SCX,SFRP2,SFRP5,SHANK2,SKI,SLC7A11,SMURF2,S…	802 (18)
POU2AF1		transcription regulator		-0.291	0.0442	CCR5,CD44,CD74,CD79B,DAPK1,FGL2,IL6,IRF4,MEF2B,MID1,MYC,RC3H1,RIPOR2,S100A10,SPI1,SPP1,TGFB1,TRAF3
SPIB		transcription regulator		-0.296	0.0019	ARMC3,ATF3,BTK,CCR2,EGR1,EGR2,EPCAM,IL18,IL2RA,IRF4,KIT,KLF6,MEF2C,NFKB1,P2RY12,P2RY6,RAD51B,TENM4,TNFRSF11B
CREBZF	-0.334	transcription regulator		-0.302	0.0035	CEBPB,CIDEA,CYP17A1,HSD17B3,HSD3B1,INSIG1,PDK4,PPARGC1A,STAR	848 (16)
LDB1	0.169	transcription regulator		-0.304	4.53e-09	ACOX2,ACTB,ADRA2C,ANGPT1,ANXA1,ATP8A2,BTK,CCR2,CD79B,CDH13,CDKN1A,CERS4,CLIC3,CYFIP2,DLK1,DPP4,DUSP15,ENO2,FBP1,FNDC3B,FTH1,GJA1,GPRC5B,GSN,IL18,IL1RAP,IL2RA,ITM2C,KCTD17,KIT,LHFPL2,LMCD1,LMO2,MAP3K5,MEF2C,PCBP3,PDZD2,PISD,PLCG2,PSTPIP1,RAB32,RASGRP1,RHOBTB3,RNPEP,RPS6KL1,SCARB2,SERPINF1,SFRP1,SFRP2,SIRPA,SKI,SLC25A47,SLC5A9,SLIT1,SMOX,SPI1,SPRED1,TES,TGFB1,TGFB2,THY1,TLR2,TNFRSF10B,UNC93B1
MAF	-3.349	transcription regulator		-0.316	0.00259	ACSS2,CRYAB,CRYBA1,CRYBB1,FABP7,G6PC2,HMGCR,IL12B,IL12RB1,IL2RA,MAF,NUAK1,PCSK2,SQLE,TGFB1	703 (15)
SPDEF		transcription regulator		-0.334	0.000114	AGR2,APC,CCN2,CDKN1A,COL13A1,COL16A1,COL6A1,COL6A2,FZD8,ITGA5,ITGA6,LASP1,SDC1,SDC2,SOX17,TGFB1,TNC,WNT5A	880 (20)
CEBPD	0.436	transcription regulator		-0.358	2.37e-05	ALOX5AP,APOC3,ASNS,CASTOR2,CDK6,CDKN1A,CEBPB,COL6A1,COL6A2,CSF1R,CSF3R,FABP4,FGF1,FN1,FOS,IGFBP5,IKBKE,IL6,ITGAV,KLF5,MYC,PDGFA,PTAFR,SLC5A12,TGFB1,TNC,TNFAIP6,VLDLR	921 (20)
PROX1	-1.474	transcription regulator		-0.361	0.00168	ANGPT2,CCL26,CDKN1A,CHGA,CHGB,CRYBB1,IL18,ITGA9,LYVE1,MMP9,RGS4,SCG2,THY1,TNNT3	412 (7)
PIAS2	-0.082	transcription regulator		-0.371	0.00293	CDKN1A,FOS,IRF1,ITGA2,SLC11A1	906 (23)
SS18	-0.105	transcription regulator		-0.378	0.017	CACNA1G,GADD45B,GPR137B,NGFR,PDGFB,SLC34A2,SOCS3,SOX2
CDKN2B		transcription regulator		-0.378	0.0166	ASNS,ASS1,BCAT1,DNMT3B,GLS2,PSAT1,PSPH
PAX1		transcription regulator		-0.389	0.00774	ASCL1,DLX3,GBX2,GRHL3,IRF6,KRT14,KRT17,NKX3-2,PPL,THY1
FOXC2	1.137	transcription regulator		-0.422	1.18e-06	ACTA2,ADIPOQ,ALPL,ANGPT2,CFD,EFNB2,FABP4,FN1,IHH,ITGB3,LIPE,MET,MMP9,OSR1,PHEX,PPARGC1A,RSPO3,RUNX2,SLC35F3,SPP1,SSTR2,SYT6,TCF15,VILL,WNT5A	851 (22)
BARX2	-0.744	transcription regulator		-0.436	0.00082	ACTA2,CTHRC1,FGF12,MATN2,MMP1,MMP9,MYLK,SCG2,TIMP3	314 (7)
ZNF382		transcription regulator		-0.447	0.000284	CDK6,HMGA2,ID1,IKBKE,MYC
SOX3		transcription regulator		-0.447	2.58e-05	ANGPT1,APCDD1,CYP26A1,DUSP1,DUSP4,DUSP5,EOMES,EPHA2,FABP1,GDF3,IER5,INHBA,IRX3,SOX17,SOX2,TEAD1,TGFB2,TNFRSF19,TWIST2,WNT5A
CDX2		transcription regulator		-0.486	0.0236	APC,CDKN1A,CLDN1,CYP26A1,FGF1,GKN2,HMGA2,HOXB2,HOXB5,IL6,JUN,KCNJ15,KLF4,KLF5,KRT23,LAMC2,MUC2,MYC,MYCN,MYO1A,PARD6B,SOX17,SOX2,TAC1,TGFB1
LEF1	-0.633	transcription regulator		-0.493	7.56e-11	ACAN,ACTA2,ACTG2,ADIPOQ,ANXA1,ARHGDIB,ARHGEF26,ARRDC4,BLK,CACNA1G,CAPN3,CARD11,CCDC3,CD101,CD44,CD79B,CDKN1A,COL11A1,COL9A1,CSF3R,CX3CR1,DGKH,DLX3,ECM1,EMILIN2,ENO2,ENPP2,FAS,FGF10,FN1,G0S2,GNAO1,HAS2,ID2,IGF1R,IL12RB2,IL6,INPP5F,JUN,KCNB1,KCNJ3,LONRF1,LRIG1,MYC,MYZAP,NR0B1,NTN4,PDGFB,PHLDA1,PIK3R6,PKIB,PLA2G7,PLCXD1,PPM1L,PRG4,PRKCH,PTPRO,RBPMS,RUNX2,SH3GL3,SMPD3,SPP1,STX11,TAFA3,TGFB1,TLR2,VSTM…	899 (23)
HTT	0.414	transcription regulator		-0.494	2.18e-20	ACOT7,ACTA2,ACYP2,ADAMTS2,ADAMTS4,ADCY5,ADCY8,AGPAT4,AK5,AMPD3,ANTKMT,APOA1,ATF3,ATP1A1,ATP2A2,ATPAF1,BASP1,BDNF,C1R,CACNA2D3,CCN2,CD74,CDH8,CDKN1A,CEBPB,CERK,CHRNB2,CIT,CKB,CLCN1,CLDN1,CLIC6,COCH,COL16A1,COL6A1,CORO2B,CPLX2,CPNE5,CRYAB,CSF1R,CTSD,CYFIP2,CYP27A1,DCN,DGKG,DLX3,DNAI1,DNM1,DRD1,DRD3,DUSP5,DUSP6,EGR1,EGR2,ENO2,ENPP2,EPB41L3,ETNPPL,EVL,FABP7,FGF1,FHIT,FN1,FOS,GALNT13,GALNT14,GAP43,GAS…	981 (22)
MAFB	-2.221	transcription regulator		-0.501	5.58e-08	ACTB,ACTN1,ALDOB,APOC3,AQP4,BTBD17,CACNA2D3,CAP1,CFAP61,CMKLR1,CNN2,CRYBB1,DLK1,EGR2,F13A1,FBLN5,GFRA2,HTR2B,LGALS3,MAFB,MID1,MMP9,MTSS1,NUAK1,OLFML2B,PCSK2,PDK4,RGS4,SERPINB2,SLC9A9,TAGLN,TMOD1,TSPAN1,UCN3
HOXD10		transcription regulator		-0.506	7.81e-05	APOF,CAPN6,CD44,CTNNA3,DAPP1,HBEGF,HEBP1,MAOB,NEFM,NME1,NUDT5,PAK1,REN,RHOB,RHOC,S100A11,TFPI,TIMP2
NEUROG3		transcription regulator		-0.508	0.0318	ABCC8,CDH8,CDKN1A,CHGA,DRD1,EFNB2,ENPP1,IL20RA,LCN15,MNX1,NTRK2,RHOB,SCG2,TDO2,TRNP1,TTR
SMARCD3	-1.399	transcription regulator		-0.509	0.000163	ACAN,CD44,FMOD,KLF4,MGP,NKX2-5,NPPA,SOX2,WNT5A	612 (16)
IRF4	1.515	transcription regulator		-0.52	0.00024	ACP5,ALPK2,ALPL,ANGPT1,BNIP3,CASP10,CCL17,CCR7,CDK6,CFLAR,CTSS,CX3CR1,DOCK8,ENTPD1,EOMES,HSPA8,IL12B,IL12RB1,IL2RA,IL6,IL9,INPP5D,IRF1,IRF4,IRF5,MYC,NFKB1,PDCD1LG2,PDCD6,PROCR,RHOB,RUNX2,SPP1,STK17B,XCL1,YWHAH	851 (19)
ZBTB18	0.645	transcription regulator		-0.529	2.55e-06	C1QTNF1,CAPN6,CHSY3,DUSP10,EMILIN1,FST,IGDCC4,LAMC2,MET,PIK3R6,TRIL,ZYX
HDAC2	-0.24	transcription regulator		-0.535	1.88e-05	ACAN,ACTA2,ALOX5,APOA1,CDKN1A,COL11A1,CYBB,DCLRE1C,DPT,EGR1,FABP1,FAM107A,FAS,IL12B,IL6,IL9,INPP5F,LHCGR,MMP9,MYC,MYCN,MYO1F,PDGFB,PREX1,RHOB,SATB1,SFRP1,SOX11,SOX2,TAGLN,TERT,TNFRSF19,TP63	849 (21)
MEN1		transcription regulator		-0.536	1.09e-07	ACTA2,AQP4,CD44,CDKN1A,CHGB,CNTFR,CSF1,ENO2,FABP4,FABP5,FABP7,FGF13,FN1,FOS,GFRA2,GFRA4,HOXB5,HOXB6,IGFBP2,IL18,IL6,INA,MYC,NCAM2,NFIA,NFKB1,NGFR,NOS1,NRSN1,P2RY12,PTN,RUNX2,SLC1A3,SOX11,SOX2,SSTR2,SYT6,TERT,TWIST1,VAT1L,VIP	845 (21)
HMGA1	1.586	transcription regulator		-0.542	3.3e-08	ACTA2,ALPL,ARL2BP,CAV2,CCN1,CD44,CEP19,CRYAB,CTSH,DPYSL4,EGR1,FOS,FOSL2,GSN,HMGCR,IL15,IL2RA,IL6,INSIG1,KIT,KLF2,LIPE,LY6E,MMP9,MYC,MYH9,MYO1F,NKX2-5,PHLDA2,RHOB,SDC4,SFXN1,SHC3,SLC9A6,SOD3,SOX17,SOX2,STEAP3,SYPL1,TAGLN,TWIST1,WNT6,ZYX	860 (19)
MEOX1	-2.392	transcription regulator		-0.555	0.00185	GATA4,MEF2C,MEOX1,NKX2-5,NKX3-2
ID2	-1.458	transcription regulator		-0.568	4.45e-10	ACTA2,CCR2,CCR7,CD44,CDKN1A,CEBPB,CSF1,DTX1,DUSP1,DUSP10,DUSP4,EGR2,EGR4,EOMES,FAS,FCER1G,GADD45B,IL6R,IRF4,IRF5,IRF6,ITGB3,KLF6,LAMA4,LEPR,LMO2,LRIG1,MAF,MAP2K6,MYB,MYC,NEFM,NGFR,NR4A1,NR4A3,NTRK2,PDGFA,PIK3IP1,PTPN14,PTPN5,SDC1,SH2D1A,SMOC2,SOCS3,TF,TNFRSF19,TNFRSF4,TRAF3,TRAF4,TUBA1A,WNT11,WNT6	800 (25)
MYF6		transcription regulator		-0.575	2.48e-07	ACACB,ANGPTL4,BDNF,BRINP3,CCL17,CCL26,CDKN1A,CTSB,CTSH,DCN,DPP4,FGF2,FST,GSN,HBEGF,IL15,IL6,INHBA,LIF,MYOD1,PDGFA,PDGFB,SERPINF1,SPP1,TGFB1,THBS1,TNFRSF10B,TNFRSF11B	354 (7)
VHL	-0.223	transcription regulator		-0.576	0.000178	ARPC1A,BNIP3,C1QA,C1QB,C1QC,CA9,CCN2,CDKN1A,CTSD,ENO2,FN1,FTH1,FTL,GAL3ST1,GNG4,HSD3B1,IGF1R,IL18,IL6,ITGA5,LOXL2,MAF,MAVS,NEDD9,NFKB1,NOX4,PDGFB,PFKFB3,PISD,RUNX1,SFMBT1,SLC1A3,SPP1,TAGLN,TGFA	804 (19)
HIVEP1	0.473	transcription regulator		-0.577	0.00358	CARD11,FCER1G,IL18,IL6,LY96,MAP2K3,MYD88,NFKB1,PIK3R6,RRAS,TGFA,TLR4	762 (10)
ZNF217	-0.078	transcription regulator		-0.577	4.94e-05	AGR2,COL8A1,CREB5,EOMES,GATA4,GPRC5A,ITM2A,LMO3,MYC,MYCN,NEFL,NMU,PKP2,PLAT,RGS20,SLC6A15,STRA6,VSNL1,WNT5B	355 (6)
HDAC6		transcription regulator		-0.578	0.00162	GAA,GDF6,HPS1,IL6,JUN,MYC,MYD88,NOG,PDGFB,SLC1A2,TAGLN,TGFB1,TRAF4	846 (22)
ILF3		transcription regulator		-0.587	0.00828	ABCA9,ACSS2,ALDH1A2,ANXA5,ATF3,CFH,COL14A1,ELF3,FABP5,FMN1,FOS,ID2,IL6,LGALS3,MAFB,PLA2G7,TNC	272 (7)
BTG2	0.608	transcription regulator		-0.589	0.025	ACTA2,DIAPH2,ERC1,FN1,IGFBP2,IL6,MMP1,NOX4,TIMP2
EOMES	2.792	transcription regulator		-0.592	2.73e-08	ACTA2,ACTC1,ADCYAP1,ANXA1,APLNR,CAP2,CDH8,CRABP1,CRYM,CYP26A1,DUSP4,EGFLAM,EOMES,FAT3,FREM1,FZD8,GSC,ITGA2,LHX9,MAP2K6,MEOX1,NEFL,NEFM,PCDH19,PITX1,PLXNA4,PREX1,RGS2,RND3,SOX17,SOX2
MSC	2.684	transcription regulator		-0.607	0.000541	AMPD3,ASB2,FABP4,FCRL4,ITGA9,LZTFL1,MAP7D2,MYBPC2,PDP1,PIEZO2,SCEL,SDSL,SPP1,XCL1,ZNF423
IRF8	-0.162	transcription regulator		-0.614	1.24e-09	ARC,ARID5B,ATF3,CACNA1G,CCR2,CCR7,CD74,CDKN1A,CSF1R,CSF3R,CTSS,CUX2,CYBB,DCDC2,EGR1,EGR2,ENPP1,FAS,FOS,GABRA3,GABRG3,GABRQ,GABRR2,GFI1B,HCN1,IL12B,IL15,IL18,IL6,IRF4,IRF5,ITPR3,KLF4,KLF6,LIF,MAF,MAFB,MET,MMP9,MYC,NFKB1,STX11,TBX18,TERT,TLR4,TREM2,TWIST2	738 (14)
WT1	-1.265	transcription regulator		-0.618	6.03e-06	ACTN1,AMH,AMHR2,APC,AREG,ASNS,BTK,CCL21,CCL26,CCN2,CDKN1A,CSF1,CSF1R,CSPG4,EGR1,ENO2,FGF1,GPC5,GSN,HBEGF,IGF1R,IL1RAP,JUND,KLF4,KRAS,LGALS3,MMP9,MYC,MYCN,NME1,NR4A2,NRAP,NTRK2,PDGFA,PHLDA1,SDC1,SH3BP5,SLC20A1,SQLE,TERT,TGFB1,TGFB3,THBS1,TIMP3,VLDLR,WDR90,WT1	831 (20)
GLIS3	2.923	transcription regulator		-0.62	0.0242	ADAMTS8,ADM2,CCL17,CDH13,COL12A1,COL13A1,COL14A1,COL16A1,COL6A1,COL6A2,DIO1,GLIS3,IL6,ITGA2,MAFB,SOD3,TSHR
EBF1	0.394	transcription regulator		-0.626	3.51e-05	ACACB,ADCY3,ADIPOQ,CBLB,CCR2,CD79B,CDH8,CEBPB,CNGA2,CRABP1,CSF1R,FBP2,GFI1B,IL12B,IL12RB1,IL6,INPP5D,IRF1,KRAS,LIPE,MYC,MYD88,PHKA2,PIK3R3,PPARGC1A,PPP1R3C,PRKAA2,PRKAG3,PYGB,SFRP2,SOCS3,TLR2,TLR4	844 (19)
ZIC2	-0.401	transcription regulator		-0.649	0.000929	ACSS3,ALPK2,APBA2,ATP10A,BEND4,CSF1,CXCL14,DRD1,FMN2,GATA5,IGF2BP1,IGFN1,LAMC3,LRP2,MFAP5,MKX,MMP9,PI15,PKP2,SFRP2,SRC
VDR	0.136	transcription regulator		-0.653	1.31e-08	ABCC3,ACE,ACOX3,ACP5,ACTA2,ADIPOQ,AGR2,ANGPT2,APC,ATP6V0D2,CALB1,CD36,CD44,CDKN1A,CEBPB,CISH,CLDN1,CSF1,CTSK,CYP3A4,EDN1,EGR1,FGG,FN1,ID1,IGFBP5,IL12B,IL18,IL6,JUN,KCNE4,KL,LBH,LIPE,MAGI1,MYC,MYD88,NEDD9,NPPA,PHEX,PLD1,RAPGEF1,REN,RGCC,RNF144A,RUNX2,SERPINC1,SLC34A2,SOCS3,SPP1,SRC,TERT,TGFB2,TLR2,TMEM100,TMPRSS2,TP63,VCL,ZYX	779 (17)
PAX2	-0.641	transcription regulator		-0.655	0.00112	ALDH1A2,ITGAV,ITGB3,KIT,OSR1,SFRP2,SSTR2,WFDC2,WNT5A,WT1	730 (7)
ERG	1.139	transcription regulator		-0.666	1.1e-09	ACHE,ACTN1,ADCY8,ADHFE1,AGR2,ARHGAP22,ARHGEF6,ATP10A,CADPS,CAMSAP2,CAPN13,CHRNB2,CIT,CLDN1,CUX2,DBN1,DGKG,DIAPH2,DLK1,DMBT1,DOCK2,EGFL7,EPB41L3,FLNB,FMNL2,GABRG3,GUCY1A1,IGF1R,IL6,IL9,ITGA6,KIF5C,LIPG,MAGI1,MAP3K5,MET,MMP1,MMP9,MPL,MYCN,NEDD9,NR4A2,NXNL2,OTOS,PHACTR2,PIERCE1,PIM1,PLAT,PNOC,PPM1E,PRKCI,PSTPIP2,PTPN6,RAB3B,RAPGEF1,RAPH1,RBMS1,RGS3,ROCK2,RRAS,SCNN1G,SGMS2,SIPA1,SLC39A6,SNCA,SPP1,SRC…	715 (14)
KCNIP3	-0.575	transcription regulator		-0.671	0.000428	ACP5,ACTA2,C2CD4A,CALCA,CCR2,CCR7,FOS,FOSL2,GIT1,IL6,ITGA2,MID1,SIRPA,SLAMF8,SOCS3,TGM2,TNFAIP6	840 (20)
REST	0.65	transcription regulator		-0.683	2.23e-10	ALOX5,AMPD3,ASCL1,ATF3,B3GAT1,BDNF,C1QA,C1QB,CHGB,CHRNB2,CMKLR1,DCX,DRD3,EFNA5,EOMES,EPHA10,FGF12,GAP43,GATA4,GRIN2B,INA,JUN,KCNQ4,MAP6,MYC,NCAM2,NEFM,NELL1,NPPA,NTRK3,OSBP2,P2RY4,PCLO,PHKB,PTPRN,RGS7,SCG2,SCTR,SOX11,SYT4,TAC1,TERT,TRPM2,USP37,VIP	914 (21)
GMNN	-1.146	transcription regulator		-0.714	3.7e-06	ANGPT1,APCDD1,CDKN1A,CYP26A1,DUSP1,DUSP4,DUSP5,EOMES,EPHA2,FABP1,FGF2,GDF3,IER5,INHBA,IRX3,SOX17,SOX2,TEAD1,TGFB2,TNFRSF19,TWIST2,WNT5A	822 (15)
GFI1		transcription regulator		-0.742	4.92e-05	CCR7,CDKN1A,CELA2A,CFLAR,CSF1,DGKG,EGR2,ENTPD1,FOSL2,GFI1B,GJA1,GKN2,ID2,IL6,IL6R,IRF1,ITGB3,JUN,KLF2,LPAR1,MAFB,MAFF,MAP3K5,MYC,NFKB1,RASGRP1,RASL11B,SESN3,TESC,TNK2,TRAF3	597 (17)
MEOX2	-0.24	transcription regulator		-0.744	0.000553	ANGPT1,CDKN1A,CTSS,EDN1,FGF2,HBEGF,ID1,IL6,ITGAV,ITGB3,NKX3-2,VCL	763 (14)
FOXO3	-0.257	transcription regulator		-0.745	1e-09	ACAN,ACTA2,ADAMTS13,ANGPT1,ANGPT2,ANXA1,AQP4,ASS1,ASTN2,ATP6V0D2,BCL10,BNIP3,BTG1,C1QA,CASTOR2,CCN1,CCN2,CD44,CDKN1A,CERS4,CFLAR,CLDN1,CTSB,DDIT4,EGR1,EGR2,EGR4,ENO2,FABP4,FABP5,FAIM2,FLNB,FMOD,FOS,GABRR2,GADD45B,GFI1B,GRB14,HMGCR,HTATIP2,ID1,IGF1R,IL6,INHBA,ITGB2,KLF4,LCP2,LRIG3,MEF2C,MET,MMP9,MRAP2,MRC1,MTHFD2,MXD4,MYC,MYOD1,NTN4,PAK1,PDK4,PFKM,PIK3IP1,PLA2G7,PPARGC1A,PPRC1,PRCP,PRG4,PRKAA2,RBM…	979 (19)
GATA1		transcription regulator		-0.745	1.71e-07	ACTN1,AFF3,ALOX5,ALOX5AP,ANGPT2,ANK1,CA2,CCR5,CD36,CDK6,CDKN1A,CYBB,EGR1,ENPP1,F10,FYB1,GAR1,GFI1B,IKZF1,IL6R,ITGA6,ITGB3,KIT,LEPR,LMO2,MAP3K5,MPL,MYB,MYC,MYCN,NFKB1,NOP2,NPPA,NR4A2,NRARP,PIGQ,PIM1,PRDM8,PRKG1,PSMG4,PSTPIP2,PTPN6,RANBP1,RUNX2,SATB1,SELP,SKI,SLMAP,SNCA,SRC,TGM2,TPM1,UAP1,UHRF1,USP25,ZFPM1	639 (17)
DMRT1	-0.859	transcription regulator		-0.747	0.0162	ADAMTS19,ADAMTS20,CADM1,CLDN11,FGF10,FOXL2,GJA3,IGF1R,MAP2K3,MAP2K6,MAPKAPK3,MGAT4A,SLC1A1,SOX2,TRIM50,VCL
YY1		transcription regulator		-0.753	9.98e-08	ACTA2,ACTC1,ANKRD1,BDNF,CCR5,CDKN1A,CEBPB,CHGA,CHRDL1,COL19A1,COL9A3,CRABP1,CRYAB,CSF1,CYBB,DDIT4,DLX3,DNAJB4,EDN1,EGR1,EGR2,ENO2,FAS,FOS,FZD8,HAS2,HAVCR1,HMGCR,ID2,IGFBP5,KCNB1,KLF2,KLF4,LATS2,LRP2,MYC,MYOD1,NGFR,NKX2-5,NOG,PDGFA,PLP1,PROX1,PTBP3,RND3,SCARB1,SDC1,SFXN1,SHC2,SINHCAF,SLC1A2,SLC1A3,SLC25A4,SRC,STAR,TAGLN,TGFB2,TGM2,TNFRSF10B,TNFRSF4,TP53INP1,TPM1,TREM2,UHRF1,VAV1,WT1	960 (21)
HOXA4	-0.77	transcription regulator		-0.755	1.75e-05	ACTA2,ANKRD1,CCN1,CCN2,MYC,TAGLN,TAGLN2,TGFB2	679 (16)
HR		transcription regulator		-0.781	0.022	AGPAT4,BOC,COL6A1,DLX3,FGF13,GJA1,KCNIP1,NACC2,SOSTDC1
RUNX3		transcription regulator		-0.806	2.88e-13	ABCC2,ACAN,AKAP6,CAPN6,CCN1,CCN2,CCR7,CD44,CDKN1A,CFLAR,CHST3,COL12A1,COL4A4,CRIM1,CSF1R,EOMES,FGF2,FMN2,IL18,MID1,MMP9,MYC,NUAK1,PRG4,PTPN21,REEP1,RHOBTB3,RTN1,RUNX1,SCARA3,SGCD,SPP1,SPRED1,ST3GAL5,TEAD1,TGFB1,TGFB2,THY1,TIMP2,TLCD4,WNT5A,WT1,XCL1	929 (22)
GATA2	1.043	transcription regulator		-0.824	2.06e-07	ACHE,AK1,ALOX5,ANGPT1,ANGPT2,AQP9,ARHGEF5,C11orf97,C1QC,CALCA,CCR2,CD36,CDK6,CDKN1A,CELA2A,CHGA,CHST13,CSF1,CSF1R,CYBB,DLK1,DMBT1,DUSP15,EDN1,EDNRA,F13A1,FABP4,FAT1,GBX2,GFI1B,GPR65,GRTP1,HMGA2,IKZF1,IL6,INKA2,ITGA2,KIT,KLF2,KLF4,KRT13,LMO2,LYPD6B,MAFB,MAOB,MCTP1,MEF2C,MMRN1,MPL,MYB,MYC,NPPA,PIERCE1,PLB1,PRSS57,RAB44,RGS18,RHCE,RUNX1,SELP,SERPINB2,SLC18A2,SNCA,SOX2,SPI1,SSTR2,TEAD1,TESPA1,TGM2,TH…	1069 (23)
BCOR	-0.114	transcription regulator		-0.832	0.00511	ARID5B,CCNO,CD44,CD74,CDKN1A,DDX21,DUSP4,FLNB,GSC,IFI27L2,IGFBP5,IRF4,ITGA6,MYC,PTPN6,SMARCD3,TLR4,TNFAIP8,WDR43	850 (22)
EHF	-1.49	transcription regulator		-0.834	0.000975	ACTA2,ALOX5,ANGPTL4,CCBE1,EHF,GRHL3,HOPX,IL6,KIT,KLF5,MET,MMP1,PLAT,SAA1,SCEL,TFPI,TGFB1,THY1,TNC,TNFRSF10B	573 (7)
SCX	1.854	transcription regulator		-0.842	0.00197	ACAN,ID1,SCX,SPP1,TBX20,TIMP3,TNC
GLI2	0.25	transcription regulator		-0.861	2.23e-07	ACTA2,BNC1,CCL17,CDKN1A,DLX3,GATA4,IL15,IL6,IL6R,IRF6,KRT17,LAPTM5,MEF2C,MEOX1,MLH1,MMP9,MYC,MYCN,MYOD1,NKX2-5,PAX9,PFKFB3,PRKCH,RUNX2,SFRP1,SOX17,SPP1,STK32C,TERT,TFAP4,TGFA,TGFB2,WNT5A	1013 (26)
TSC22D3		transcription regulator		-0.899	0.000271	ADIPOQ,ANXA1,CDKN1A,DUSP1,EDIL3,EGR2,EGR3,IL2RA,IL6,NFKB1,RUNX2,SMURF1,SMURF2,TLR2	896 (19)
DUX4		transcription regulator		-0.905	0.00853	ACTC1,BIN1,CRYM,E2F7,FAIM2,IGFBP5,IL15,IL6,MYOD1,NOG,SLC34A2,WNT5A
ATOH1		transcription regulator		-0.911	0.00895	CUX2,IL18,MUC2,MYO7A,NOS1,PCP4,RASD2,RBM24,SCN11A
GPS2	0.191	transcription regulator		-0.925	0.0243	ATP8A2,BIN1,CDK6,CDKN1A,CLIC3,EVL,HEBP1,HIVEP2,IL12B,IL6,MCTP1,MYC,RHOB
NCOR1	-0.052	transcription regulator		-0.925	0.00561	ADIPOQ,APOF,ATP1A1,CD82,CDKN1A,CSF3R,CYP17A1,DIO1,DUSP1,HAS2,IKZF1,IL15,MB,MMP9,MYD88,MYOD1,PDK4,PFKFB1,PIM1,PTGDS,SERPINF1,SLC2A5	889 (25)
HDAC3	0.014	transcription regulator		-0.927	0.00977	ACACB,ACAN,ALOX5,CD36,CD55,CD82,CDKN1A,DIO1,ENPP2,FOS,FOXL2,IL12B,IL6,MMP9,MYC,SLC1A2,SNCA,SPP1,TAGLN,TBX5	622 (16)
CRTC1	0.519	transcription regulator		-0.928	0.00352	BDNF,CPS1,MMP1,NEDD9,NR4A1,NR4A2,PPARGC1A	593 (10)
PRDM1	-0.168	transcription regulator		-0.929	1.72e-05	ACOX2,ADAM8,AFF3,ALPL,ANGPTL4,BTK,CA9,CADPS2,CCR7,CD44,CD48,CD74,CDK6,CFH,CLDN1,CRISPLD2,DDIT4,ECM1,EGR2,EVA1A,FAM167A,FGG,FOS,FTH1,ID2,IGF1R,IL6,IRF4,LGALS3,LRRN1,MAF,MAFB,MALL,MAP3K5,MAP7D2,MS4A4A,MSC,MYC,MYO1A,PCSK6,PROX1,PTPN6,RAPGEF3,RGS16,RGS18,SLC25A37,SLC2A5,SLCO2B1,TNFAIP6,TTR	964 (18)
TRIM28	0.098	transcription regulator		-0.936	4.27e-09	AMH,APOA1,AREG,ARID5A,C1orf116,CA2,CAB39L,CLDN11,CTHRC1,CYP26A1,CYP27A1,EGR1,FOS,FOXL2,FST,GDF15,HSD17B3,HSD17B7,HSD3B1,IHH,IL6,INHBA,IRX3,KLF2,LHX9,LIF,LMO7,MAP3K5,NFKB1,NIBAN1,PTGDS,RAMP3,RSPO2,SOX11,SOX2,STING1,TRIM47,WNT5A,WNT6,WNT7B,ZSWIM5	851 (19)
AIP	0.125	transcription regulator		-0.943	1.83e-06	ACKR3,AKAP5,CMKLR1,CX3CR1,CYSLTR1,DUSP1,F2RL1,GNG4,GPRC5A,HTR1D,NPR3,PROKR1,RASGRP1,RGS16,RGS18,RGS2,RGS4,RGS7	669 (7)
SIX5	0.131	transcription regulator		-0.943	0.00587	ATP1A1,FZD8,IGFBP5,MDFI,PTN,SFRP2,TWIST2
MYOD1	1.22	transcription regulator		-0.963	8.99e-08	ABRA,ACACB,ACHE,ACTA2,ACTC1,ADCY7,ANKRD1,ASB2,ASS1,BIN1,BNC1,CADPS2,CAV3,CDKN1A,CRYAB,CXCL14,DAO,DES,DUSP1,ENPP2,HAS2,HSPB8,ID2,IGFBP5,ITGA7,KLF6,LDB3,LIF,LIPE,MAFB,MEF2C,MMP1,MSC,MUSK,MYH7,MYL4,MYO5B,MYOD1,PDGFA,PFKM,PPARGC1A,PRIMA1,RBM38,RRAS,RUNX1,SBK1,SDC2,SGCA,SRC,TGFB1,TNNT3	765 (20)
IFI16		transcription regulator		-0.969	0.00856	AREG,CDKN1A,CSF3R,EDN1,FAS,GATA4,HSD3B1,MTHFD2,MYC,NKX2-5,NPPA,PCP4,PIM1,TERT	957 (26)
ZFPM2	-0.738	transcription regulator		-1	0.00299	ALPL,AMH,ATP2A2,CYP17A1,MYH7,NPPA	151 (5)
RAX		transcription regulator		-1	0.0156	ARR3,CNGA3,OPN1LW,RLBP1,SOCS3
HOXC9		transcription regulator		-1	0.02	FGF10,MMP9,SPP1,TIMP3,WNT5A
SMAD7	-0.204	transcription regulator		-1.035	4.33e-11	ACAN,ACTA2,ADAMTS2,ALDOB,APOC3,AREG,BGN,BMPR1B,CCN2,CDKN1A,CFC1,CFLAR,COL6A1,DCN,DNMT3B,FAS,FN1,FST,GATA4,HBEGF,ID1,ID2,IL12B,ITGA6,ITGA7,MATN2,MET,MMP1,MMP9,MYC,NID2,PLAT,SMURF2,SOX17,SOX2,TAGLN,TERT,TGFA,TGFB1,TGFB2,TGFB3,TIMP3,TPM3	812 (19)
NKX2-1		transcription regulator		-1.053	1.46e-08	ADCYAP1,AGR2,AGTR2,AQP5,AREG,CD74,CNMD,COL9A1,CYGB,DPP4,EDIL3,ENC1,ENPP2,GJB3,HMGA2,LMO3,LRP2,MTF1,MYB,PARD6B,PLP1,RBPJL,ROS1,SATB1,SCARA3,SCNN1G,SLC34A2,SLC6A14,SOX17,SOX2,TGFB1,TGFB2,THBS1,THY1,TMEM37,TNC,TP63,TSHR,TSPAN7,UGT8,WNT11,WNT5B,WNT7B	297 (4)
KLF10	0.407	transcription regulator		-1.063	0.0274	CD44,CDKN1A,EPCAM,IL12B,MET,MMP9,TGFB1
STAT3	0.308	transcription regulator		-1.078	1.56e-20	A2M,ACHE,ACTA2,ADIPOQ,ALPL,AMPD3,ANGPT2,ANGPTL4,AQP5,AREG,ARRDC4,ASIC1,ATP10A,ATP6V0D2,BCAR3,BMF,BOC,CA9,CCL17,CCN2,CCR5,CCR7,CD44,CD74,CDKN1A,CEBPB,CFH,CFLAR,CLN6,CMPK2,COL24A1,CTSB,CTSK,CX3CR1,CXCL14,CYP26A1,DDIT4,DIO3,DMBT1,DNMT3B,DPP4,DUSP1,DUSP5,E2F7,EDN1,EGR1,EGR2,EGR3,ENO2,ENPP2,ENTPD1,EOMES,FAS,FBXO40,FCER1G,FGF10,FGF2,FGG,FGL2,FLRT3,FN1,FOS,FST,GAP43,GBX2,GJA1,GPR65,GRIN2B,HAS2,HAVCR1,HT…	906 (16)
HOXA11		transcription regulator		-1.091	0.00197	ANXA1,CD47,ITGA8,KLF2,PDGFA,RUNX2,SPP1
SND1		transcription regulator		-1.095	0.00133	ACHE,ADCY8,ADHFE1,ANGPTL4,CAMSAP2,CAPN13,CLDN1,DGKG,DLK1,DMBT1,EMP1,GABRG3,ID1,KIF5C,LAPTM5,MAFB,NXNL2,OTOS,PIERCE1,PNOC,PPM1E,RAB3B,RGS16,SGMS2,SIPA1,SLC39A6,SLCO4A1,SMURF1,TAC1,TESC,TNFRSF21,ZNF536
NFE2L2	-0.152	transcription regulator		-1.113	1.72e-10	ABCC2,ABCC3,ACE,ACP5,ACSS2,ACTA2,ACTC1,ADCYAP1,AKR1B10,ANGPT1,AOX1,AREG,ARID5B,ATF3,ATP1A1,ATP6V0D2,BASP1,BDNF,BNIP3,C1QA,C1QC,CALB1,CCN2,CCR2,CD36,CD74,CDKN1A,CFD,CFH,CHGB,CLDN1,CNMD,CSF1,CTSD,CTSK,CYBB,DBF4,DDIT4,DUSP10,ENTPD1,ERRFI1,F10,F13A1,FABP1,FABP4,FABP5,FGF13,FN1,FTH1,FTL,GADD45B,GDF15,GSS,GSTA4,HBEGF,HSP90AA1,HTATIP2,IFRD1,IL18,IL6,IL6R,LCP2,LIF,LUM,LY6E,MAF,MAFF,MATK,MCFD2,MCTP1,MEF2C…	885 (16)
RBCK1		transcription regulator		-1.131	0.0304	ATP1A1,CCN1,CCN2,IL6,IRF1,MAP2K6,MYC,NFKB1
ARID4A	0.757	transcription regulator		-1.131	0.0137	EMB,HOXB5,HOXB6,PTGDS
ZBED6		transcription regulator		-1.134	0.0319	COL13A1,CRIM1,DDIT4,FOSL2,KCTD1,MYBL1,ROCK2
GTF2IRD1	0.499	transcription regulator		-1.154	0.0106	ARR3,CUX2,FNDC1,FOS,LRRC2,MKX,OPN1LW,PDE6H,RXFP1
HNF1B		transcription regulator		-1.177	0.00126	ACTN1,AGR2,ALDOB,ATP10A,BGN,CA2,CD44,CD99,CIT,CLDN1,DUSP1,FN1,HMGA2,ID1,IHH,ITGB6,LIPG,LUM,MAFB,MET,NEDD9,NID2,PLEK2,PSTPIP2,S100A6,SCNN1G,SRC,ST6GALNAC1,TTR	378 (4)
TCF3	0.523	transcription regulator		-1.187	3e-05	ABCC8,ACACB,ADIPOQ,AREG,ASB2,ATF3,CA2,CCR2,CD2,CD55,CD79B,CDK6,CDKN1A,CERK,CREB3L2,CSF1R,DTX1,EAF2,ENPP1,ENTPD1,EPCAM,GADD45B,GFI1B,GM2A,ID1,ID2,IL2RA,IL6,IL9,IRF1,IRF4,JUN,JUND,KIT,KLF2,KLF4,KLF6,LHCGR,LMO2,MAF,MAL,MEF2B,MEF2C,MSMO1,MYC,MYCN,MYL4,MYOD1,NELL1,NPPA,NR0B1,NR4A3,NRAP,NTRK2,PLCG2,PSAP,RGS16,RIPOR2,SCX,SEMA3G,SOCS3,SOX2,ST8SIA1,STK17B,TF,THY1	988 (25)
RUNX1	2.955	transcription regulator		-1.188	1.22e-08	ACHE,ACTA2,ALOX5AP,ANK1,ANXA2,ATF3,ATP8A2,BAALC,BLK,CDKN1A,CREB5,CSF1,CSF1R,CYB561,EGFL7,EGR2,FAP,FAS,FN1,FOSL2,GFI1B,HEY2,HMGA2,ID2,IHH,IL2RA,IL6R,IRF5,ITGA11,ITGA2,ITGA9,ITGAV,ITGB2,ITGB3,JAM3,KIT,KLF2,LCP2,LUM,MET,MMP9,MPL,MYB,MYC,MYH9,NOP2,NR4A3,OGG1,PRKCB,RGCC,RUNX1,RUNX2,SHANK2,SOX17,SPATA6,SPI1,SPP1,ST3GAL5,TWIST1,XCL1,ZFPM1	813 (18)
MED14	0.035	transcription regulator		-1.192	0.0191	CD36,CIDEC,DUSP1,FABP4
NKX2-5	-1.276	transcription regulator		-1.193	2.3e-05	ACTA2,ANKRD1,BMP10,GATA4,GJA1,GJA5,HOPX,MEF2C,MYCN,MYLK,NKX2-5,NPPA,RBFOX3,TBX5	518 (15)
SMAD5	-0.175	transcription regulator		-1.2	7.79e-05	ALPL,CCN2,COCH,CSF1,CSF2RA,DLX3,ID1,PDGFA,PDGFB,RUNX1,RUNX2	832 (20)
SOX2	-1.688	transcription regulator		-1.207	1.08e-21	ABCC3,ABTB2,ACKR3,ADAMTS4,ALOX5,ANGPT1,APC,APCDD1,AQP4,ARPC1B,ASCL1,ATF3,ATG10,C1QL1,CCN2,CCN5,CD44,CDKN1A,CHST3,CLDN11,CNP,COL9A3,CREB3L2,CSF1R,CXCL14,CYP26A1,DLX2,DLX3,DNMT3B,DUSP1,DUSP4,DUSP5,ELF3,ELOVL1,EOMES,EPCAM,EPHA2,FABP1,FABP7,FBXO15,FOS,FST,GADD45B,GAL3ST1,GATA4,GBX2,GDF3,GJA1,GJC2,GRHL3,GSC,GSN,HHAT,HMGA2,HOPX,ID2,IER5,IL6,INAVA,INHBA,IRF6,IRX3,JAM3,JUN,KANK1,KLF4,KLF6,KRT14,KRT17,LMC…	939 (24)
GATAD2B	0.735	transcription regulator		-1.213	0.00176	COL6A2,FRMD4A,GRIN2B,JUND,LSAMP,MEF2C,NFIA,NTRK2,PTN,SLC24A5
MTA3	0.148	transcription regulator		-1.214	0.00363	ACTA2,ACTC1,BCAS3,CD79B,FN1,MYC,SDC1,TGFB1
SATB2	0.363	transcription regulator		-1.234	0.0294	CDH6,ENPP1,FABP4,FLVCR2,ITGA8,MFAP2,NOX4,PIEZO2,SDC2,SPP1
SOX9	1.181	transcription regulator		-1.236	6.65e-11	ACAN,ADAMTS10,AMH,CCN2,CD44,CDKN1A,CNMD,CREB3L2,DLX3,DMBT1,DUSP6,ECM1,FGF1,FGFBP1,FN1,FOS,FZD9,GAS7,GDF10,IHH,IL6,KIT,KLF4,LBP,LRP6,MUC2,MYC,MYLK,NKX3-2,PDGFA,PHEX,PTGDS,RUNX2,SMPD3,SOSTDC1,SOX2,TGFB1,THBS2,TIMP2,TWIST2,WNT11	803 (24)
SMARCA4	-0.097	transcription regulator		-1.246	4.28e-18	A2M,ACE,ACTA2,ADIPOQ,AGR2,AMOTL2,APOA1,AREG,ARHGAP30,ARHGDIB,ARRDC4,ASNS,BIN1,BNIP3,CAV3,CCDC169,CCDC9B,CCN2,CCR2,CD44,CD47,CD74,CDKN1A,CEBPB,CLDN1,CNP,CNTN1,CPS1,CRIM1,CSF1,CSF2RA,CTSB,CTSH,CTSS,CYP26A1,CYP3A4,DES,DGKG,DLX2,DUSP13B,DUSP4,DUSP6,ECM2,EDNRA,EGR1,EGR4,EHF,ENO2,ENTPD3,EVA1A,FABP4,FAM167A,FAS,FBP1,FGFBP1,FGG,FHL2,FLNB,FN1,FOS,FOSL2,GADD45B,GCHFR,GJB5,HCLS1,HCN1,HKDC1,HMGA2,HNMT,IFI30,…	1002 (23)
TSHZ3	-1.197	transcription regulator		-1.252	8.88e-05	AMPD3,CRYM,ELMOD1,FGF10,FMOD,FOSL2,GDF10,GSG1L,KCNG1,NGFR,NR4A1,NTRK3,RAMP3,RSPO2,SLC1A2
ZNF750		transcription regulator		-1.258	0.0148	IFI35,IL12B,IL15,IL6,IRF1,IRF4,IRF5,IRF6,LAMC2,RIPK3,RNASEL,SAMHD1,TINCR,TLR2
HOXA9		transcription regulator		-1.265	0.00917	CALB1,CD36,CDK17,CISH,CYBB,EDNRA,ENPP1,GLRX,HOXB2,ID2,IRX3,JUN,KCNA3,KIT,LY86,MAFB,MYB,MYC,NFIA,PCDH1,PIM1,SATB1,SDC4,SPP1,USP1	491 (12)
HMGB2	-0.276	transcription regulator		-1.285	0.00166	ADIPOQ,CD36,CEBPB,FABP4,IL6,INHBA,LIPE,MMP1,PHLDA1,RUNX2,TGFB3	1005 (23)
SUPT16H		transcription regulator		-1.291	7.47e-05	AMPD3,CCDC9B,CDKN1A,CFAP61,CPNE4,DUSP5,EGR1,HOXB2,ID2,KCNF1,LOXL2,MLIP,MSN,MYADML2,MYOD1,MYOM2,NEFL,PALMD,PDGFA,RIPOR2,SAMD12,SCG2,SGCA,TFPI,UNC5A,VCL
ZNF32		transcription regulator		-1.32	0.00109	ACTA2,FAP,LEPR,SOX2,TGFB1	789 (12)
MESP1		transcription regulator		-1.342	0.0156	GATA4,MEF2C,NKX2-5,TWIST1,TWIST2
MSX1	0.338	transcription regulator		-1.342	0.0227	CDKN1A,EGR2,GJA1,MYOD1,RUNX2,SFRP1
CEBPA	-0.456	transcription regulator		-1.387	4.23e-12	A2M,ACTA2,ADCY7,ADIPOQ,AKR1B1,ALOX5AP,ANXA1,APCDD1,APLNR,APOC3,AQP5,ARHGEF5,ASCL1,ASNS,ASS1,BIN1,BTG1,CA2,CDKN1A,CEBPB,CELA2A,CFD,CPS1,CSF1,CSF1R,CSF2RA,CSF3R,CTSK,CYP3A4,DDX21,DLX3,EEF1A2,EFNB2,EGR2,EXTL2,FABP4,FOS,G0S2,GBX2,GFI1B,GJA1,GLRX,GRHL3,HAS2,HMGA1,HMGCR,ID1,ID2,IL12B,IL6,IL6R,IRF6,JUN,KLF2,KLF4,KLF5,KRT14,KRT17,LEPR,LHCGR,MMRN1,MYC,MYCN,MYOD1,NR4A2,PCSK6,PPARGC1A,PPL,PPP1R3C,PTAFR,RARR…	862 (19)
EED	1.124	transcription regulator		-1.408	0.0144	BDNF,GATA4,HMGA2,IGFBP2,KLF4,MYC,RUNX2,TBX5,THY1
TLX3		transcription regulator		-1.432	0.0251	ASCL1,GABRB2,GRIA3,TAC1,VIP
SOX10		transcription regulator		-1.438	4.48e-05	ACKR3,CDKN1A,EGR2,FN1,FOS,GAS7,IRF1,IRF4,ITGA6,KCNB1,MYC,NGFR,PLP1,PTN,SOD3,SOX2	716 (14)
DACH1	1.002	transcription regulator		-1.46	6.2e-05	CDKN1A,EGR1,FGF2,FOS,ID1,IL6,JUN,KLF4,MEF2C,PLAT,SOCS3,SOX2,TGFB1	779 (19)
MXI1	-0.547	transcription regulator		-1.476	0.00559	ID1,ID2,MTHFD2,MYC,MYCN,SLC7A1
MED1	0.403	transcription regulator		-1.484	1.44e-07	ACACB,ADAMTS18,ADCY5,ADIPOQ,CAPSL,CCN5,CCR7,CD79B,CDKN1A,CFD,CIDEA,CREB5,CYP17A1,DIO1,FABP4,GAP43,HAS2,HECW2,ID2,IKZF1,IRF4,JAKMIP1,KLF2,KLF4,KLF5,LIF,MB,MEF2C,MET,MMP1,MND1,MYC,MYCN,MYH7,MYOD1,NID2,PDK4,PIM1,PRKCH,SERPINB2,SLC27A1,SLC36A4,SOX2,SYNPO2,TERT,TGM2,THBS1,TMPRSS2	1029 (23)
HDAC4	-0.362	transcription regulator		-1.486	5.07e-19	ACTA2,ANGPTL4,ARC,ATF3,BDNF,C1QC,CALB1,CALCA,CAP2,CDKN1A,CHRDL1,CNTN1,CSRP3,CYFIP2,DRP2,EGR2,ETNPPL,FGF13,FOS,FST,GABRA4,GABRA5,GABRB2,GABRG3,GPHN,HMGCR,HOMER1,IL6,JUN,KLF2,LGI1,MEF2C,MMD2,MMP9,MYBPC2,MYOM2,NECAB1,NEDD9,NR4A1,NR4A2,NTM,PPM1E,PRKCB,RGS2,RGS4,RGS7,RTN1,RUNX2,SERPINB2,SH3GL2,TAGLN,TERT,TNFRSF11B,TSPAN13,TSPAN7	804 (22)
NAB2	0.75	transcription regulator		-1.501	0.00142	ALOX5AP,CDKN1A,FGF2,FN1,FOS,ID2,TGFB1	894 (21)
NOSTRIN		transcription regulator		-1.507	2.02e-06	ACE,ANXA5,FGF1,FN1,IL6,ITGA5,ITGB3,KIT,MMP9,NFKB1,SELP,TFPI,THBS1	667 (13)
SIX2		transcription regulator		-1.508	0.0298	CACNA1D,CDKN1A,CHGA,CHGB,DLK1,ENO2,FAS,FBP1,MAFB,PCSK2,PTPRN
NEUROD1		transcription regulator		-1.555	0.017	ABCC8,ATP2A2,CDK5R1,CDKN1A,CHGA,DCX,JUND,NTRK2,NTRK3,PCSK2,SCNN1B
FOXC1		transcription regulator		-1.56	2.26e-09	ALPL,ECM1,EFNB2,EGR1,ELF3,FOS,IFI30,IFI35,IHH,IRF1,IRF6,IRX3,ITGB3,JUN,KLF2,KLF5,KLF6,MAFB,MAFF,MID1,MMP9,MYB,MYC,OSR1,PHEX,PTAFR,RNASEL,RSPO3,RUNX1,RUNX2,SAMHD1,SFN,SLC35F3,SOCS3,SPINK5,SPP1,SSTR2,SYT6,TCF15,TINCR,VILL,WNT5A	889 (21)
MEIS2	-0.535	transcription regulator		-1.585	1.59e-06	ALDH1A2,COL9A1,DRD1,GSC,ID1,OSR1,RUNX2,SHOX2,SOX11,TWIST1,WNT5A,XCL1
EBF2	-1.083	transcription regulator		-1.6	3.67e-05	ADAMTS15,ADCY3,CIDEA,CNGA2,LGI1,LGI2,MEOX1,NIBAN1,NTM,REN
HDAC5		transcription regulator		-1.605	1.21e-06	ACTA2,ARC,CDKN1A,DAPK1,DRP2,EGR2,ETNPPL,GAP43,HMGCR,JUN,KLF2,KLF6,MEF2C,MMD2,MYC,MYCN,MYH7,NPPA,NR4A1,PPARGC1A,RUNX2,TAGLN,TWIST1,USP28	884 (22)
FOXP1	0.73	transcription regulator		-1.623	6.18e-07	CDKN1A,CSF1R,DAB1,EGR2,GAP43,GDF3,HCN1,HOPX,IL6,IRF1,IRF4,JUN,KCNT1,LMO2,MEF2C,MYCN,NFIA,NGEF,NKX2-5,PDK4,PIK3IP1,PPARGC1A,RASD1,SPHKAP	866 (21)
HOXB13		transcription regulator		-1.633	0.0445	BCHE,CDKN1A,CEP170,LRRN1,MYC,POPDC3
MESP2		transcription regulator		-1.664	0.00414	GATA4,MEF2C,NKX2-5,PAX9,TWIST1,TWIST2
DAXX	0.28	transcription regulator		-1.689	0.00218	CASP10,CDKN1A,CSF1,HMGCR,HSPB1,IKBKE,IL6,MAVS,MMP1,NFKB1,RTN1,TRAF3	867 (20)
TAF4	0.545	transcription regulator		-1.732	2.1e-10	AREG,BDNF,CCN2,CLDN1,DCN,DLX2,EHF,FMOD,HBEGF,HOPX,ID2,ITGA6,KLF4,KLF5,LRRC15,LUM,MAFF,MAFK,PDGFA,PDGFC,PPARGC1A,PTN,RUNX1,SFRP2,SPP1,TGFB1,TGFB3,THBS1,THBS2,VAV3,VEGFD	379 (7)
TFE3		transcription regulator		-1.75	0.000327	ATP6V0D2,CIDEA,CKB,CTSD,CTSK,EGR2,HMGA2,INSIG1,KLF2,LGALS3,MYH9,NGFR,PHOSPHO1,PPARGC1A,RUNX2,SLC1A1,SOX2,TPP1,WT1	675 (11)
ASCL1	-2.754	transcription regulator		-1.761	2.32e-05	CACNA2D3,CDK5R1,CDKN1A,CPLX2,DCX,DIO3,DLX2,EPHA2,HEY2,ID1,IKZF1,LAMP5,NEFL,NEFM,NFASC,PAH,PCSK6,PLCXD3,PNOC,PROX1,S100A10,SEZ6L,SOX2,SYT6,TEAD1,ZMAT4
ZBTB48	0.305	transcription regulator		-1.763	0.000882	ACKR3,CD74,COL11A1,HSPB1,MCF2,MSS51,ROS1,SHISA9,SNCA,SPP1,TMEM100
TFAP2C	0.441	transcription regulator		-1.772	0.00107	CCN2,CD44,CDKN1A,EGR3,EOMES,FMN1,FREM2,FST,HOXA1,HOXA2,IGFBP5,MAL,MMP9,MYC,SEMA3B,TGFA,THBS1	935 (20)
TFEB	0.422	transcription regulator		-1.797	1.73e-09	ACP5,ACTA2,AGA,ALOX5,AQP9,AREG,ATP6AP1,ATP6V0D2,BTG1,CCL17,CCN2,CD48,CD55,COL16A1,CTSA,CTSB,CTSD,CTSH,CTSK,CTSO,CTSS,DCN,ECM1,EGR2,EMP1,EOMES,FN1,FOS,GAA,GATA4,GM2A,GPR65,HEXA,HMGA2,HMGCR,HOPX,HPS1,IDS,IFI30,IL6,ITGA11,ITGA5,JUN,LAPTM4B,LAPTM5,LGALS3,LIF,MET,MLH1,MYC,MYH7,NAGA,NFIA,NGFR,NPPA,NUP153,PHLDA1,PLA2G15,PLA2G7,POM121C,PPARGC1A,PSAP,RUNX2,SCARB2,SLC1A3,SMC4,SOX2,SPP1,ST8SIA4,TAGLN,TGIF1,…	962 (21)
NFIC	-0.188	transcription regulator		-1.8	1.55e-06	ADAM12,CD44,CD74,CDKN1A,CELA2A,COL6A1,COL6A2,CSF1,CYP17A1,EBF3,FABP7,G0S2,GPX7,HSP90AA1,ITGB2,JUND,LHCGR,NFIA,NOTUM,PDGFA,PLEK2,RASSF9,RGS16,SLC7A2,STXBP6,TGFB1,TMEM140,TREM2,TWIST2,WNK4,WNT5A	973 (19)
CITED2	0.372	transcription regulator		-1.846	1.74e-05	ABTB2,ADAP2,ANGPTL4,ASAP3,CMPK2,CRIM1,CYBB,DUSP1,ENDOD1,ENTPD1,FMNL2,GADD45B,HOPX,IFI35,IFRD1,IL12B,IL6,IRF1,KIF5C,KLF6,LCP2,MID1,MMP1,MRC1,OTUD1,PARP9,PCGF2,PCMTD1,PDGFC,PFKFB3,PIM1,SERPINB2,SLAMF8,SLC1A3,SLC38A2,TAGAP,TGM2,TMEM140,TNFSF15,TOR1AIP1,VEGFD	727 (14)
KLF11	1.062	transcription regulator		-1.851	6.86e-09	ACAN,ACTA2,ADAMTS13,ADAMTS8,CCN2,CCR2,CEBPB,CHRNA4,CHRNB2,DCN,EDN1,FABP3,IL12B,ITGA2,ITGAV,ITGB3,ITGB6,MAOB,MMP1,MMP9,MYC,NFKB1,PDGFA,PDGFB,PDK4,PLAT,PPARGC1A,TGFB1,TGFB2,TGFB3,TGIF1,THBS1,THBS2,TIMP2,TIMP3,TSHR	862 (18)
GLI1	-0.666	transcription regulator		-1.876	8.46e-30	ABCC3,ACTA2,ALOX5,ANXA1,AQP5,ARC,ATF3,ATP6V1C2,B3GALNT1,BNC1,C1orf116,CADPS,CAV2,CCL26,CCN1,CCSAP,CD44,CDK6,CDKN1A,CFL2,CHST13,CMPK2,CSF1,CTPS1,CTSB,DIRAS2,DUSP4,DUSP5,DUSP6,EGR1,EGR3,ELAVL2,EMB,EMP1,ENDOD1,EPB41L4B,FAS,FGF1,FGF10,FOS,FUCA2,GADD45B,GATA4,GATA5,GJA3,GPRC5A,GRIA3,GSTA4,HEY2,HIVEP2,HOXB5,ID1,ID2,IDS,IGF1R,IL17RD,IL18,IL2RA,IL6,IMPA2,INSIG1,ITGB6,KCNJ8,KIT,KLF4,KLF5,KLF6,KRAS,KRT17,L…	954 (22)
TFAM	0.094	transcription regulator		-1.877	0.0246	AREG,ASNS,CHAC1,CHRNA4,FABP3,FABP4,FABP5,GDPD5,GNAT3,ITGA5,MAN1C1,MTHFD2,MUC2,NIBAN1,NXNL2,PLCB2,PSAT1,RUNX2,SLC7A1,SLC7A11,SLC7A3,SNCA,STX11
XBP1	0.434	transcription regulator		-1.88	1	ACACB,APOA1,ATP2A2,BNIP3,DUSP6,EXTL2,FAS,FN1,IL6,IRF4,KLF4,KLHDC3,MCFD2,MYC,PDIA2,PHLDA2,PTPRN,S100A6,SLC38A2,TNFRSF10B,TPP1,TTR
FOXF2		transcription regulator		-1.88	0.000454	ACTA2,ACTG2,CDK6,CDKN1A,FN1,PDGFA,PDGFB,TAGLN,WNT5A	793 (17)
RB1	0.627	transcription regulator		-1.905	0.000156	ACTB,ACTC1,ALPL,ANGPT2,ATF3,ATP1A1,BNIP3,CAP1,CCN2,CD44,CDCA7L,CDK5R1,CDKN1A,CYSLTR1,DLK1,DUSP1,E2F7,EDNRA,EGR1,EGR3,ENTPD8,EOMES,FABP4,FAS,FGF2,FN1,FOS,FST,GADD45B,GPRC5A,HOMER1,ID1,ID2,IGF1R,IL6,ITGAV,JUN,KIT,MAF,MAP2K3,MECR,MEF2C,MET,MSN,MYB,MYC,MYH7,MYL4,MYOM2,NEFM,NFKB1,NIT1,NKX2-5,NR4A2,NR4A3,OSMR,PIERCE1,PIM1,PPARGC1A,PPP1R17,RAMP3,RANBP1,REEP1,RHOB,SCTR,SH3BP2,SMARCA5,STING1,TERT,TGFB1,TG…	891 (20)
GLIS1	1.897	transcription regulator		-1.912	0.00112	ADAMTS10,APOD,COL16A1,COL6A2,COL8A2,FBLN5,LOXL2,LOXL3,RTN4,TIMP3
TBXT	0.004	transcription regulator		-1.948	0.017	ACAN,CD44,DUSP6,DUSP8,FMOD,MGP,NOTO,XCL1
RBL1	0.592	transcription regulator		-1.976	0.0243	CDKN1A,DUSP10,FAS,FGF2,FOS,LHCGR,MET,MYC,MYCN,PPARGC1A,SFRP1,TERT,THBS1
CBX2	-0.721	transcription regulator		-1.981	0.00881	CDKN1A,GATA4,LHX9,NR0B1,RUNX1	352 (7)
SRSF2	0.55	transcription regulator		-1.982	1	ABCC9,AKR1D1,SLC7A11,TNFRSF10B
CIITA		transcription regulator		-1.987	1	CD74,FN1,MMP9,TGFB1
ETV5	-0.552	transcription regulator		-1.994	1.77e-07	AKAP5,AQP5,CDKN1A,CLDN1,CYBB,FN1,HOPX,IL6,IL9,ITGA5,KRT13,KRT23,LCP2,LGALS3,LMO7,MAF,MET,MSN,MYB,NCAM2,PKP2,S100A14,S100A6,SAMHD1,SCARB1,SLC34A2,SPP1,TIMP3,TINAGL1,TJP2,TWIST1	804 (19)
FEV		transcription regulator		-1.997	3.6e-08	ADRA1B,ANXA2,ARHGAP36,CHGB,CNTN1,EFNA5,ENKUR,FOS,GABRQ,GCHFR,GRIA3,LPAR1,NCALD,NFIA,PCDH9,PROX1,PYGB,SATB1,SCG2,SCN3B,SLC18A2,SLC1A3,SLC6A15,STXBP6,TACR1,VTN
CERS6	2.064	transcription regulator	Inhibited	-2	0.076	CD36,CIDEC,PLIN4,PLIN5
SIM1		transcription regulator	Inhibited	-2.043	0.0239	AKR1B1,ANGPT2,ANGPTL4,AOX1,AQP4,CFL2,CLCN1,CMKLR1,COL11A1,COL12A1,CPXM2,EGR1,EYA1,FHIT,HOMER1,IL6R,ITGB3,KCNJ15,LCAT,LCP1,MSC,MYH7,NGEF,PKIB,PLP1,SEMA5B,SNX5,ST8SIA5,WNT7B
ARNT2	0.121	transcription regulator	Inhibited	-2.043	0.0141	AKR1B1,ANGPT2,ANGPTL4,AOX1,AQP4,CFL2,CLCN1,CMKLR1,COL11A1,COL12A1,CPXM2,EGR1,EYA1,FHIT,HOMER1,IL6R,ITGB3,KCNJ15,LCAT,LCP1,MSC,MYH7,NGEF,PKIB,PLP1,SEMA5B,SNX5,ST8SIA5,WNT7B
HUWE1		transcription regulator	Inhibited	-2.062	8.14e-06	A4GNT,ABCC2,ACACB,ACOX2,ACSS2,AKR1D1,AOX1,APOA1,CD36,CDKN1A,CIDEA,CIDEC,CYP27A1,ECHDC1,FABP1,GAL3ST1,GLS2,GPRC5B,INSIG1,MYC,PAFAH2,PHOSPHO1,PLIN4,STARD10,TUBB2A	604 (9)
HNF1A		transcription regulator	Inhibited	-2.067	0.000404	AADAC,ABCC2,ABCC9,ALDOB,APOC3,AQP9,C1S,CCDC198,CD55,CDH8,CENPO,CMC2,COQ10B,CPQ,CYP27A1,DPP4,DUSP6,ELF3,EML6,FABP1,FAS,FBP1,FBP2,FGF10,G0S2,G6PC2,GLIS3,GPC1,GPR137B,GRHPR,GRTP1,HACL1,HAVCR1,HMGCR,HNMT,HOPX,HPGDS,HPX,HSD17B2,IGF1R,IHH,KYAT3,LBP,LCAT,LY6E,NAT10,NOP16,NRARP,PAFAH2,PAH,PAMR1,PATJ,PDGFA,RUNX2,S100A6,SFXN2,SLC7A2,SOCS3,SRC,SSTR4,SULT1E1,SYT13,TMEM140,TMEM37,TMPRSS2,TMPRSS4,TRPM2,TTR,UGT…	1044 (22)
HLX	0.021	transcription regulator	Inhibited	-2.073	0.000107	ANKRD1,AREG,CD44,CLDN1,CTSS,EGR1,GDF15,JUN,MYC,SEMA3G,THY1	566 (7)
NEUROG1		transcription regulator	Inhibited	-2.117	3.7e-12	ASS1,C1S,CD82,CDK5R1,CFH,DCX,FABP3,FAP,FN1,GASK1B,HAS2,IL6,INHBA,ITGB3,LCP1,LRIG1,MEST,MMP9,NOG,P4HA2,PPIC,RIPOR2,SCG2,SERPINF1,TACR1,THBS1,TSPAN7	379 (7)
MYCN	1.487	transcription regulator	Inhibited	-2.122	9.84e-06	ABCC3,ABCG4,ACTB,ADAM12,AMOTL2,ARPC1B,BASP1,CCN2,CDKN1A,CLDN11,COL8A1,CRIM1,DBX2,DUSP1,DUSP4,EFNA5,EMP1,FN1,GATA4,GBX2,HMGA1,HOXA2,ID2,INHBA,ITGA2,LIF,LPAR1,LRRN1,MYCN,MYH9,MYL12A,MYOM3,NGFR,NME1,PDLIM1,PTPRO,RD3,RGS5,RND3,RUSC2,S100A10,SDC2,SHOX2,SLC16A7,SLC1A2,SLC25A19,SLC38A2,SORD,SOX17,SV2A,TAGLN,TERT,TGIF1,TGM2,TIMP2,TMPRSS2,TNFRSF10B,TPM1,ZYX	852 (19)
PTF1A		transcription regulator	Inhibited	-2.137	0.0215	CACNA2D3,CADPS2,CRABP1,GBX2,GRIK1,KLHL14,LAMP5,PNOC,RBPJL,SSTR2,ZMAT4
NCOR2	0.497	transcription regulator	Inhibited	-2.137	3.76e-07	ADIPOQ,ATP1A1,C1QA,CCN2,CDKN1A,CTSB,CTSS,CYP3A4,DIO1,FGF2,FOS,HBEGF,HPGDS,IKZF1,IL12B,IL6,JUN,KLF2,MYC,PDGFA,PDGFB,PIM1,PPARGC1A,SLC2A5,STAR,TGFB1,TGFB2,TGFB3	1040 (25)
NFIL3	0.862	transcription regulator	Inhibited	-2.182	0.00429	CD36,CDKN1A,EOMES,FAS,GADD45B,ID2,IL12B,IL9,PLIN4	896 (23)
AIRE		transcription regulator	Inhibited	-2.219	0.477	BMP10,CCL17,CCL21,COL9A3,CSF1,FABP1,IRF1,MMP9,PCP4,SLAMF8,SLC7A11,TLR2
CIC		transcription regulator	Inhibited	-2.219	0.0251	DUSP4,ITGA2,MAFF,SLC20A1,SLC7A11
MITF	-0.006	transcription regulator	Inhibited	-2.234	0.000846	ACAN,ACHE,ACP5,APC,ATP1A1,CAPN3,CD44,CDK5R1,CDKN1A,CENPO,CTSK,DAPK1,FMOD,FN1,FOS,GM2A,GPR137B,HPGDS,HPS1,IL6R,IRF4,KCNN2,KIT,LGALS3,MET,MGP,MMS19,MYL4,NGFR,NPM3,PMEL,PPARGC1A,PPM1H,QDPR,RFC5,SCARB1,SDC1,SERPINF1,SLC24A5,TERT,XCL1	784 (18)
BCL3		transcription regulator	Inhibited	-2.285	0.00185	CD82,DUSP5,EGR1,EGR2,FABP3,FOS,ID1,ID2,IL6,IRF1,JUN,NR4A1,PDK4,RAB29,S100A14,SELP,VLDLR	807 (16)
ZFHX3	-0.636	transcription regulator	Inhibited	-2.333	4.81e-05	APOA1,C1QL1,DRD1,EPCAM,F2RL1,HCN1,ID2,IL2RA,LRRC17,MYH7,MYOD1,NGFR,PLA2G7,PROK2,RASL11B,RGS16,RGS2,SCN4B,SFRP5,SLC10A4,TAC1,TUBA1A,VIP,WNT5A
OTX2		transcription regulator	Inhibited	-2.358	0.00124	COL8A1,CPXM2,EFNA5,ENPP2,FLVCR2,GBX2,MYOD1,PMEL,RBP3,SLC24A5,SOX2,STRA6,TF,TNC,TTR
RBPJ	0.038	transcription regulator	Inhibited	-2.362	1.95e-08	ACTA2,ALDH1A2,ASCL1,CCR7,CD44,CD74,CDKN1A,CSF1,DTX1,DUSP1,EFNB2,EMILIN2,ENPP1,FGF1,FGF10,FGF13,FGF2,FOS,GDF10,GPX8,HAS2,HEY2,HSD17B7,IL15,IL18,IL6,IL9,INHBA,IRF5,JUN,LIF,MAP2K3,MUC2,MYC,NFKB1,NR4A1,NRARP,P2RY6,PDGFB,REN,SDC1,SLAMF8,SLC2A6,SOX2,SPATA13,SPP1,STAR,TGFB2,TGFB3,TNC,TPPP3,TWIST1,VEGFD,WNT5A	870 (20)
TCF7L1	1.015	transcription regulator	Inhibited	-2.365	1.68e-05	ARHGDIB,ARHGEF26,ATF3,CCDC3,DNMT3B,DPP4,ENPP2,EOMES,FN1,GATA4,GBX2,JUN,KCNJ3,KIT,KLF2,KLF4,MYCN,NKX2-5,NR0B1,PLCXD1,SOX17,TNFRSF19,VSTM2A	821 (18)
MED16	-0.419	transcription regulator	Inhibited	-2.438	0.000571	ANGPTL4,CCN1,CCN2,MMP1,MMP9,TAGLN	627 (12)
TCOF1	0.939	transcription regulator	Inhibited	-2.519	0.000754	AKR1B1,AMHR2,ANXA2,BNIP3,BPHL,COL8A1,FABP3,FZD8,GRHPR,HACD4,IGFBP5,KIF26B,KIT,MEOX1,NCALD,PPP4R4,PPRC1,SOSTDC1,TMEM100,UTP4
ZBTB16		transcription regulator	Inhibited	-2.529	4.81e-08	AGPAT4,CCR2,CD2,CD44,CD55,CD74,CDKN1A,CSGALNACT1,DDIT4,DTX1,EGR2,EMB,EYA2,F13A1,F2RL1,FABP7,GGT7,HSD17B2,ID2,IL12B,IL12RB1,IL2RA,IL6,IRF6,ITGAV,ITGB3,KCNJ8,KIT,KLF2,LY86,LY96,MAF,MMP9,MPL,MYC,PDGFB,PIK3CB,PIK3R3,RUNX2,SATB1,SELP,SGMS2,SPP1,TNFAIP8L1,TNFRSF4,UCK2,UPP2	908 (21)
SIAH2	1.093	transcription regulator	Inhibited	-2.563	1.23e-07	ANGPT1,ANXA2,CCL17,CD36,CEBPB,CTSB,CTSD,CTSK,FABP4,FGF1,ID2,LGALS3,MARCO,MEOX1,PLA2G7,PLK3,SDC4,SOCS3,SPP1,THBS1,TREM2	793 (14)
KLF15	-0.853	transcription regulator	Inhibited	-2.623	1.1e-08	ACTA2,ALDOB,ALPL,APOD,BCKDHB,CCN2,CD36,CEBPB,CHAC1,CLDN15,CMKLR1,DDIT4,DIO3,FABP3,FABP5,HTR2A,IL6,IL6R,IRX3,LUM,MMP9,MYOD1,NPPA,PDK4,PIM1,PLIN4,PLIN5,PPARGC1A,SLC27A1,TAGLN,VEGFD	805 (19)
BCL6	0.079	transcription regulator	Inhibited	-2.648	1.13e-09	A2M,ACAN,ATP2A2,C1QTNF12,CCDC122,CCR7,CD2,CD44,CD79B,CDKN1A,CISH,CLCN2,CSF1,CTSK,CUX2,DUSP6,EGR3,ENTPD1,FAS,FGF2,FMOD,FTH1,IL12B,IL18,IL2RA,IL6,IL6R,IL9,IRF1,IRF4,JMY,KCNG4,KLF6,LBH,LPIN1,MAF,MGP,MRC1,MYB,MYC,MYOZ2,NFKB1,PDCD1LG2,PDCD2,PDIA2,PFKM,PTPRO,RGS4,RNASEL,RWDD3,SDC1,SMOX,SOCS3,TGFB1,TPM3,TRIM2	793 (16)
PRDM2	0.293	transcription regulator	Inhibited	-2.72	0.00305	ADCK5,ANK2,BCO1,CA2,CHSY3,COL14A1,DNAJB4,DUSP5,EGFL7,GJB6,HSP90AA1,IFI35,KIAA0513,MAP2K6,MYBL1,MYC,NAV3,PBLD,PPP1R14C,RBMS1,SGO2,SLC20A1,SLC36A4,SMARCD3,ST6GALNAC1,TLCD4,TRIB2,TRPS1,UGT1A1,VGLL3,WSCD1
LHX1		transcription regulator	Inhibited	-2.803	5.07e-08	AADAT,ALDOB,ANGPT1,ASS1,CADPS2,CALCA,CYB561,DAB1,DPP4,EMB,FABP3,FBP1,FN1,FZD8,KCNJ15,KL,LRP2,MMP1,MMP9,PAH,PCDH19,PCP4,PRXL2A,RBM47,SAMD3,SEMA6D,SFRP1,SLC16A13,SOSTDC1,SOX17,TWIST1,ZDHHC21
KLF2	4.008	transcription regulator	Inhibited	-2.873	2.13e-08	ACE,ACKR3,ANGPT2,APLNR,AQP5,ASS1,CCN2,CCR5,CCR7,CD36,CD55,CDKN1A,CNP,CX3CR1,DOCK2,ECM1,EDN1,FABP4,GATA4,HMGCR,ID1,IL6,ITGB3,LBP,LEPR,MAP3K5,MSMO1,MYC,PTGDS,RGS3,RUNX2,SMURF2,TBX5,TERT,TFPI,TGFB1,TGFB2,THBS1,TWIST1,VAV1,WEE1	969 (21)
SPI1	-2.85	transcription regulator	Inhibited	-3.109	1.44e-06	ACP5,ACTA2,ACTB,BTK,C1QC,CCL17,CCR7,CD79B,CDK6,CDKN1A,CMPK2,CSF1,CSF1R,CSF2RA,CSF3R,CTSK,CTSS,CXCL14,CYBB,DDX21,DUSP6,EGR2,FCER1G,FOS,FTH1,HELZ2,HSPA8,ID2,IKZF1,IL12B,IL18,IL2RA,IL6,IL9,IRF4,ITGA5,ITGB2,JUN,KIT,KLF4,LMO2,LY6E,MEF2C,MMP1,MRC1,MYB,MYC,NCF2,NKX2-5,NOL6,NOX4,PDCD1LG2,PTPN6,SPI1,SPP1,TGFB1,TLR2,TLR4,VAV1	764 (17)
KMT2D	0.657	transcription regulator	Inhibited	-3.239	2.67e-05	ADCY5,CA10,CD55,CD74,CSPG4,CTSD,DDX21,ECI2,EFHC2,EGR3,FABP3,GABRG3,GLYCTK,GPX7,GRHL3,HFM1,HOPX,INHBA,IRF1,IRF6,KLF4,KRT17,KRT23,MAVS,MEOX1,MMP9,MYOM3,NEIL2,NGFR,NPR3,NR4A1,PPIC,PRIMPOL,PTGR1,PTGR2,SCARB1,SLC1A6,SLC38A6,SORD,STING1,SYDE2,TCF15,VSIG8,VTN,WDR17,WTIP	862 (14)
ESRRA		transcription regulator	Inhibited	-3.285	1.56e-09	ABCC9,ABRA,ACKR3,ACTC1,ADAM8,ALDOB,ANGPT1,ANGPT4,ANGPTL4,ANXA1,APLNR,ATP1A1,ATP2A2,ATP6V0D2,BSND,CCL17,CCR2,CCR7,CD36,CKB,CKMT2,COL4A4,COL8A1,CRHR2,CSRP2,CSRP3,CTSH,CX3CR1,CYBB,CYP17A1,EFNB2,EGFL7,EGR3,EMILIN1,ENO2,EPHA2,ESM1,FABP1,FABP3,FABP4,FBP1,FGF1,GALM,HMGCR,HTATIP2,IHH,IL6,JAM3,KCNJ8,KRT13,KRT222,KRT23,KRT40,LEPR,LIPE,MAOB,MMP9,MYH7,MYH9,MYOZ2,PDK4,PDP1,PIK3R6,PLXDC1,PPARGC1A,PPP1R1B,PRCP,…	1002 (25)
HNF4G	0.186	transcription regulator	Inhibited	-3.286	0.00412	APOC3,CAPN2,CNN2,FHOD1,FLNB,ITGA2,ITGA5,ITGAV,LAMC2,PDLIM1,VCL
PPARGC1A	-2.11	transcription regulator	Inhibited	-3.315	7.83e-14	ACACB,ACSL6,ADAMTS2,ADAMTS20,ADIPOQ,AK1,ANGPTL1,APOC3,APOD,ARR3,BNIP3,CACNA2D2,CAV3,CCN2,CD36,CDKN1A,CEBPB,CFH,CIDEA,CKMT2,COL6A2,CPXM1,CTSA,CXCL14,CYP2D6,CYP3A4,DCN,DIO1,DPT,EDN1,EMILIN2,FABP3,FABP4,FAM20A,FAS,FOS,FREM1,GADD45B,GDF15,GJC2,GLRX,GNAO1,IGFBP5,IL18,IL1RAP,IL6,INHBA,INPP5J,INSIG1,KYAT3,LAMA4,LIF,LPIN1,LUM,MAL,MAOB,MAP1B,MAP2K6,MB,MFAP5,MSMO1,MYC,MYD88,MYH7,NFKB1,NPPA,NR4A1,OGN,OSMR,P…	1049 (22)
SALL4	0.126	transcription regulator	Inhibited	-3.402	2.1e-09	ACTB,ALOX5AP,ANGPTL4,ANXA2,CAV2,CCN1,CCN5,CD44,CD74,CFL2,COL13A1,DNM3,EFNB2,EPCAM,EPHA2,FBXO15,FGF1,FN1,FYB1,GJA5,HMGA2,ID2,ITGA6,ITGAV,JUN,LASP1,LCP2,LOXL2,LRP2,MMP1,NGFR,PDGFC,RND3,SDC2,SFRP1,SMURF1,SOX2,TGFA,TPM1,VAV3,VCL,WNK4,WNT5A	886 (19)
HNF4A		transcription regulator	Inhibited	-3.849	4.54e-07	AAMDC,ABCC2,ABCC3,ABHD10,ACAD8,ACMSD,ACOX2,ACOX3,ACSS2,ACSS3,ACTA2,ACTN1,ADCY7,ADGRB1,ADPRH,ADPRHL1,AGA,AGTPBP1,AKR1B1,ALDOB,AMIGO3,ANXA5,APOA1,APOC3,AQP9,AS3MT,ASCL1,ASNS,ATF3,ATP10A,AVPI1,BAZ1A,BNC1,BORCS6,BPHL,BTG1,C1S,C22orf23,CACNA2D2,CAP1,CAPN2,CBR3,CCDC82,CD36,CD55,CDCA7L,CDKN1A,CDR2,CEBPB,CENPO,CEP19,CETN3,CFL2,CHAC1,CHRNB2,CIDEC,CKB,CLDN1,CLXN,CMC2,CNN2,CNTN1,COQ10B,COQ8A,CPED1,CRKL,CTSA…	1089 (23)
ARB2A	-0.047	transcription regulator			0.0302	AMH,GATA4,WT1
FEZF1		transcription regulator			0.0444	KRAS,MMP1
ZNF91		transcription regulator			0.0302	DDAH1,NEDD9,TGFB3
TLE1	1.052	transcription regulator			0.00635	ATF3,DUSP1,EGR1,FOS,ROCK2
RYBP	0.162	transcription regulator			8.72e-05	ANKRD1,ATF3,CCN2,FAT2,ID1,JUN,PPP2R2C,RUNX1,SOX2,TEAD1,TGFB1,TGFB2,WNT5A,WNT5B	568 (10)
TBPL1	0.158	transcription regulator			0.0444	FOS,TP63
CMTM2		transcription regulator			0.0444	CYP17A1,STAR
Tle1		transcription regulator			0.00196	ATF3,DUSP1,EGR1,FOS	564 (7)
IRF2BP1		transcription regulator			0.0106	ATF3,DUSP1,EGR2,EMP1,FOS,IL6,INHBA,SESN3,TNFRSF11B
ZMIZ1	-0.568	transcription regulator			0.0124	DTX1,IL2RA,MYC
ZNF100		transcription regulator			0.0203	DDAH1,NEDD9,TGFB3
ZNF460		transcription regulator			0.0124	MMP9,MYC,NFKB1
ZNF3		transcription regulator			0.00839	MMP1,TWIST1
ZNF85		transcription regulator			0.0203	DDAH1,NEDD9,TGFB3
ZNF254		transcription regulator			0.0203	DDAH1,NEDD9,TGFB3
IRX2	0.528	transcription regulator			0.00363	EGR1,PDGFA,PDGFB,TGFB3
KLF17		transcription regulator			0.0119	CCL26,CDKN1A,CORIN,FN1,ID1
TFCP2L1	1.078	transcription regulator			0.0137	FBXO15,KLF4,SIRPA,SLC27A4
NFX1	-0.247	transcription regulator			0.00286	HSD17B7,NFKB1,TERT
ZNF431		transcription regulator			0.0203	DDAH1,NEDD9,TGFB3
ZNF300		transcription regulator			0.0236	IL6,MYC
TBX18	-1.797	transcription regulator			0.0203	GJA1,HCN4,NKX2-5
BATF2		transcription regulator			0.00839	CCN1,JUN	554 (7)
TCF25	0.162	transcription regulator			0.0236	MYH7,NPPA
HOXD13		transcription regulator			0.000682	ANGPT1,FN1,FOS,HMGA2,NEFM,NGFR,TNC,TWIST1
OSR2	0.511	transcription regulator			0.000768	OSR1,PAX9,TGFB3
SPIC		transcription regulator			0.00607	IL18,IL2RA,KIT,NFKB1	352 (7)
JDP2	0.5	transcription regulator			0.0203	ACP5,CTSK,JUN
LPXN	-0.998	transcription regulator			0.00286	ACTA2,CIDEC,TAGLN	377 (7)
E2F5	0.646	transcription regulator			0.0017	CDKN1A,DUSP10,MYB,MYC,MYCN,RANBP1,SERPINB2,TERT
TFEC		transcription regulator			0.00559	CSF3R,F13A1,IGF1R,IL6,MYH9,XCL1
HOXB8		transcription regulator			0.0444	MYLK,TAGLN
HOXA2	-1.801	transcription regulator			0.00939	HOXA2,MEOX1,PCP4,RUNX2
ELL	0.275	transcription regulator			0.000768	CDKN1A,FOS,MYC	906 (20)
SETBP1	-0.805	transcription regulator			0.0243	CARD11,CD74,CDH10,CSMD3,GPC5,MYB,MYC,NR4A3,NTRK3,PDGFB,SKI,SRC,TNC
SIM2		transcription regulator			0.00953	BNIP3,DBN1,KRT14,MUC2,MYOD1,TIMP2
PURB	0.214	transcription regulator			0.0236	ACTA2,MYC
CBX4	1.179	transcription regulator			0.0203	DPP4,HOXA2,MYC
POU2F1	0.456	transcription regulator			0.00155	A2M,AOX1,CD55,CD79B,CSF1R,DDIT4,IL6,JUND,LY6E,NDRG4,NFKB1,PRKAA2,PTGDS,SAA1,SESN2,SLC7A11,SPP1,TIMP3,TLR4,TMPRSS2,TNFRSF10B,VIP	600 (7)
TBX20	-2.189	transcription regulator			0.0191	BMP10,MYCN,TBX5,XCL1
SP100		transcription regulator			0.000334	CCN2,CDKN1A,FOS,GABRE,HSPA8,HSPB8,MMP1,THY1	817 (18)
CNBP	1.038	transcription regulator			0.0423	AK1,MYC,TNNT3
NFYB	0.057	transcription regulator			0.000563	ACTA2,ACTB,APC,CACNA2D3,CAPN3,CCNO,CCSAP,CLDN15,CNTN4,CPEB3,DNAJB6,DPP4,FAS,GABRA4,GDF6,IGDCC4,ITM2C,KCTD1,KIAA0930,L2HGDH,LPIN1,LRP2,MLH1,NUDT2,OGG1,PAQR5,PITPNM3,PTPN6,RHCE,RHOB,RUNX2,SCARB1,SHOX2,SPAG16,ST8SIA4,SYNJ2,TAFA2,TIMP3,TPM1,TTLL9,TWIST1,UHRF1
ARID1B	-0.453	transcription regulator			0.00286	ALPL,ARC,FOS
UBE2K	0.316	transcription regulator			0.0444	ACTA2,TGFB2
SMARCA1	-0.953	transcription regulator			0.00363	CDKN1A,MYC,SFN,STAR	634 (8)
POU3F3		transcription regulator			0.0423	BSND,CDK5R1,FABP7
MTA2	0.211	transcription regulator			0.00923	ACTC1,CDKN1A,ID2,JUN,KIT,MYC,SQLE	797 (15)
ATN1	0.161	transcription regulator			0.000516	ATP1A1,BASP1,BDNF,CDH8,CHGB,ENO2,EVL,FGF1,GAS7,GRIK1,GSN,HBEGF,IGFBP5,MOBP,NEFL,NEFM,OPRL1,PCTP,RGS16,SATB1,SOX11,SPP1,ST8SIA5,VAMP1,VSNL1
SOX13	-0.923	transcription regulator			0.0236	MET,WNT2
H2AX	0.124	transcription regulator			0.000111	ACTB,ANGPT1,CDKN1A,GATA4,GATA5,MLH1,MYC,PLEKHA6,PPARGC1A,PTN,SFRP2,SFRP5,SLC7A11,TIMP3	1051 (26)
KLF16		transcription regulator			0.0423	CDKN1A,DRD1,TWIST1
ACTN2	-0.385	transcription regulator			0.0423	ANKRD1,CDKN1A,WEE1
FOXO6	-0.492	transcription regulator			0.00286	CCR2,MYC,PAK1
ING4	0.069	transcription regulator			0.0423	CDKN1A,IL6,MYC
ONECUT1		transcription regulator			0.0403	ABCC2,ACACB,ACSS3,AGBL2,AGTR1,C1S,CACNA1D,CCDC198,CD36,CYGB,EGR2,EHF,ELOVL1,EMG1,FABP5,FAS,GSS,GSTA4,HMGCR,HSPH1,HTR2B,IRF6,ITGAV,LAMC2,NUDT2,PFKFB1,PMEL,SAMHD1,SLC1A3,TAOK3,TDO2,TM2D1,TMEM161A,TTR,UGT1A1
HEYL	0.222	transcription regulator			0.0423	GATA4,NPPA,TMPRSS2
ZNF410	0.962	transcription regulator			0.00839	MMP1,SERPINB2
PSMC3IP	0.136	transcription regulator			0.0302	CEBPB,CYP17A1,FABP4
BRCA2	-0.169	transcription regulator			0.0302	CDKN1A,HOXB5,STING1
ZNF429		transcription regulator			0.0203	DDAH1,NEDD9,TGFB3
NKX3-1		transcription regulator			0.000138	CA2,CTSB,CX3CR1,FOS,MMP9,MYC,PIM1,PRKCB,RUNX1,SDC1,SDC4,TMPRSS2,TWIST1,VAV3,VIL1	828 (19)
INVS	0.238	transcription regulator			0.00839	ACTA2,NKX3-2
ZNF350		transcription regulator			0.0236	HMGA2,MMP9
BAZ2A	1.132	transcription regulator			0.00607	AOX1,FHL2,KLF6,MKX
TBP	0.828	transcription regulator			0.0394	ACTB,ASNS,CDKN1A,EDNRA,FN1,FOS,GATA4,HMGCR,IGF1R,MYC,RANBP1,TGFA
MXD4	-1.886	transcription regulator			0.0444	ID2,MXD4
MLLT3	0.671	transcription regulator			0.00939	EDN1,FBP1,MYC,SCNN1G
RFX3	0.889	transcription regulator			0.031	BBS4,DCDC2,DNAI1,DNALI1,MYC
SHOX2	-1.967	transcription regulator			0.00196	FGF10,NKX2-5,RUNX2,WASF3	198 (7)
MED13L	0.558	transcription regulator			0.0203	ANKRD1,LIF,MYC
SSRP1	0.277	transcription regulator			0.0102	CDKN1A,DUSP5,EGR1,ID2,LOXL2,MSN,PDGFA,TAGLN
NKX3-2	3.154	transcription regulator			0.0203	FGF10,IHH,RUNX2
SIN3A	0.412	transcription regulator			0.0158	ACP5,BDNF,CTSK,GADD45B,INA,KLF6,LHCGR,MMP9,MYC,NEFM,SYT4,TERT
FOXL1		transcription regulator			0.00196	CCN2,MYC,SDC1,WNT5A
HES6	-0.336	transcription regulator			0.0444	CDKN1A,MMP1
ERCC6	0.314	transcription regulator			0.0444	LGALS3,OGG1
BATF3	0.828	transcription regulator			0.0444	IL12B,MMP1
ZFPM1	-1.299	transcription regulator			0.00497	ALOX5,ALOX5AP,ANXA5,CD82,CEBPB,ENPP1,FYB1,HEBP1,IL12RB2,IL2RG,KLF6,MPL,NRARP,SELP,SPI1	735 (13)
TCL1A		transcription regulator			9.72e-07	ACP5,C1QA,C1QB,C1QC,CELA2A,CSF3R,CTSB,CTSD,CTSH,CTSS,CYBB,FABP7,FCER1G,FOS,GDF15,IGSF6,ITGB2,MAFB,MARCO,MMP9,PTPRO,SCARB2,SLC11A1,TREM2	832 (15)
SMARCD1	0.171	transcription regulator			0.0302	CDKN1A,MMP1,TMPRSS2
NFIB	-0.943	transcription regulator			0.014	ADRA1B,AQP5,CACNA2D2,CREB5,EDN2,EYA1,GRIK1,HSD17B7,PLEKHF1,WHRN
MTPN	0.647	transcription regulator			0.0302	MYC,NFKB1,NPPA
MXD3	-0.765	transcription regulator			0.0236	ID2,MYCN
RING1		transcription regulator			0.0444	FOS,JUN
RCOR2		transcription regulator			0.00939	BDNF,INA,NEFM,SYT4
BRMS1		transcription regulator			0.0423	GJA1,IL6,SPP1
FOXE3		transcription regulator			0.00666	DNASE2B,PROX1,TTR

## Sheet: Atria_CN03_v_Veh_Upstream_Ana
Upstream Regulator	Expr Log Ratio	Molecule Type	Predicted Activation State	Activation z-score	p-value of overlap	Target Molecules in Dataset	Mechanistic Network
NUPR1		transcription regulator	Activated	5.886	8.26e-09	ACTA2,ANK1,AREG,ARHGEF26,ARMC7,AS3MT,ASIC1,ATF3,AVPI1,B3GNT5,BNIP3,BRINP3,CACNA2D2,CARMIL1,CCN1,CEBPB,CREB5,DENND5B,DEPTOR,DIPK2A,DPYSL5,DUSP5,DUSP8,ELMOD1,EXTL2,FGF1,FHL2,FIRRM,FZD8,GCH1,GDF15,HBEGF,HCN1,HK2,HOXB5,HSPA2,IGF1R,ITPR3,KIF23,KLF4,KLF6,LHFPL2,LIF,LRP8,MAGI1,MAN2B2,MGME1,MYC,MYD88,NAAA,NDRG1,NFIB,NGFR,NRROS,NUP50,OSBPL6,OSER1,OSGEPL1,P4HA2,PARP9,PCTP,PCYOX1,PEA15,PFKFB3,PHLDA1,PIM1,PL…	694 (12)
YAP1	0.184	transcription regulator	Activated	5.393	5.41e-22	ACADSB,ACAN,ACLY,ACSF2,ACTA2,ADAM8,ALDH1A2,AMOTL2,ANGPTL4,ANK1,ANKRD1,AREG,ARHGAP29,ARHGEF6,ASCL2,ASNS,ATF3,BCL2L1,BIN1,BMPR1B,CCN1,CCN2,CCN5,CCR7,CD109,CD36,CD44,CDH1,CDK6,CDKN1A,CDKN1C,CFLAR,CLDN1,COL4A1,COL4A2,COL9A1,COL9A3,CORIN,CPXM2,CRIM1,CSF1,CSF3,CTSD,CYP1A1,DCN,DDAH1,DIAPH2,DNASE1L3,DSTN,DUSP4,E2F7,EDN1,EGR1,EGR2,EOMES,F13A1,F3,FAS,FGF1,FLNB,FMOD,FN1,FOS,FSHR,FST,GDF15,GFPT2,GPRC5A,GPT2,…	1084 (19)
NPM1	-0.116	transcription regulator	Activated	5.114	4.87e-15	ACTA2,ADAM8,ALK,ANO6,CADM1,CCL4,CCN1,CCN2,CEBPB,COL12A1,COL16A1,COL4A1,COL4A2,CSF1,CSF1R,CSF3,ECM1,EGR1,EGR3,EGR4,F3,FN1,FZD8,GJA1,HBEGF,HOXB5,IL31RA,IL6,INHBA,ITGAV,JUN,KLF4,LAMC2,LIF,LOX,LOXL2,MEF2C,MMP9,MTSS1,MYC,NAV3,NR4A1,NUAK1,P3H2,PCOLCE2,PDGFB,PGF,PLOD2,PMEPA1,PTHLH,SDC4,TFAP2C,TGFBI,VEGFA,WNT5A	917 (17)
CREB1	-0.319	transcription regulator	Activated	4.994	2.57e-27	AKT3,ALKAL2,APOLD1,AQP11,ARC,ATF3,ATP1A1,BAG3,BCL2L1,BDNF,BHLHE40,BNIP3,BTG2,CA10,CADPS2,CALCA,CCK,CCL4,CCN1,CCNJL,CDH10,CDH8,CDKN1A,CEBPB,CH25H,CHGA,CHGB,CHRM3,CLMP,COCH,COL24A1,CRIM1,CRYM,CSRNP1,CSRP2,DCX,DKK2,DMBT1,DOK4,DUSP1,ECEL1,ECM1,EDN1,EGR1,EGR2,EGR4,EHD4,ENTPD1,ERRFI1,FAM3B,FGF13,FGF19,FGL2,FLT1,FN1,FOS,GAA,GADD45B,GFRA1,GPR63,GRIA3,HAS2,HK2,HMGA2,HMGCR,HMGCS1,HOMER1,HSPA4,HTR2A,IGSF10,…	978 (20)
SRF	0.904	transcription regulator	Activated	4.88	1.98e-26	ABRA,ACTA2,ACTB,ACTC1,ACTG2,ACTN1,ANKRD1,APOLD1,ARC,ASB5,ATF3,BATF,BCL2L1,BICC1,CALD1,CAP1,CCM2,CCN2,CDH1,CDKN1A,CLDN1,CLDN15,CLDN5,CNN2,CORIN,CSRP1,CSRP2,CTXN2,DES,DSTN,DUSP5,EGR1,EGR2,EGR3,EGR4,EXTL2,EYA2,EZR,FABP5,FERMT2,FGF1,FHL2,FILIP1L,FLT1,FOS,FST,G0S2,GCH1,GP9,GSN,HSPG2,IL15,IL6,ITGA6,ITGA9,ITGB1,JUN,JUND,KAT6B,LATS2,LBH,LDB3,LIF,LMCD1,LMOD1,LPL,LRP4,MAP4K4,MAPK13,MCF2L,MCL1,MGST1,MMP9,MY…	1114 (21)
ATF4	0.937	transcription regulator	Activated	4.643	1.94e-12	ANKRD1,AREG,ASNS,ATF3,BCAT1,CA9,CD55,CDKN1A,CEBPB,CEMIP,CFAP74,CHAC1,COL4A2,CSRP3,CTH,DDR2,ERO1A,FN1,GARS1,GCH1,GDF15,GRB10,IBSP,IGFBP2,IL6,IRAK1BP1,JUN,KL,KLF4,LGALS3,MCL1,MGST1,NDRG1,NID2,NOX4,OSMR,PENK,PPARG,PRKN,PSAT1,PTGS2,RUNX2,SERPINF1,SESN2,SH3BP2,SH3RF3,SLC1A4,SLC38A1,SLC38A2,SLC6A9,SLC7A1,SLC7A3,SLC7A5,SNTB1,SREBF1,STC2,TGFB2,TNFRSF10B,TNFRSF11B,VEGFA	888 (18)
SMAD3	0.939	transcription regulator	Activated	4.618	1.75e-21	ABCB6,ACLY,ACTA2,ADAM12,ADAMTS2,ALPL,ANKRD1,APOA1,AREG,ARHGAP22,AXIN2,BGN,C3,CCN2,CDH1,CDH5,CDKN1A,CHRDL1,CKS1B,COL4A1,COL4A2,CRISPLD2,CYP1A1,DAPK1,DEPTOR,DES,DUSP4,EDN1,EGR1,FBN1,FN1,FOS,FST,FZD8,GADD45B,HAS2,HBEGF,HHEX,HK2,IBSP,IL12B,IL15,IL6,IL9,INHA,INPP5D,ITGB1,JUN,JUND,LAMA4,LAMC1,LOX,LPAR1,LUM,MMP1,MMP9,MUC2,MYC,MYOD1,NOX4,PCOLCE2,PCSK5,PDGFB,PMEPA1,PPARGC1A,PTGS2,PTHLH,RHOB,RUNX1,RUNX2,SL…	1091 (19)
SOX4	1.528	transcription regulator	Activated	4.276	2.57e-09	ADAMTS4,AMOTL1,B3GNT5,BCAR3,BLK,CAPN2,CCN3,CD2,CEMIP2,CHAC1,CLIC6,CSRP3,DBNDD2,DUSP4,EMP1,ENPEP,ENTPD1,EOMES,EVL,FGF13,FN1,FOS,GGA2,GNRH1,IGFBP4,KIAA1958,LMO7,LUZP1,MAGI1,MAP7,MEX3A,MYOD1,NUAK1,PLXNA2,PPIC,PRXL2A,PXYLP1,RNF144A,S100A11,SEMA3C,SEMA3F,SLC7A3,SPI1,SYNDIG1L,TBXA2R,TEAD1,TENM4,TES,TNFRSF19,TUBA1A,VIM
MRTFB	-0.772	transcription regulator	Activated	4.253	7.3e-19	ACTA2,ACTB,ACTG2,AK5,AMOTL2,ANKRD1,ARID5B,BCL2L1,CALD1,CCN1,CCN2,CLDN15,CNN2,CRIM1,DDAH1,DNAJB4,EDN1,EDNRA,EGR1,EGR2,EGR3,EPHA8,EYA2,EZR,FADS2,FILIP1L,FLRT2,FN1,G0S2,INHBA,ITGA11,ITGA2,ITGA5,ITGA6,ITGAV,ITGB1,LOX,MAFK,MAP2,MAPK13,MYH9,NFIB,NUAK1,OSCP1,PDGFRL,PRSS57,PTGS2,PTPRO,RUNX1,SDC2,SEMA3D,SERPINB2,SLC20A1,SORBS1,SULT1E1,SYNPO2,TAGLN,TAL1,TBXAS1,TGFB2,THBS1,TPM1,TRNP1,TUBB1,VCL,WNT5A,WTIP	735 (17)
MRTFA	0.905	transcription regulator	Activated	4.029	1.01e-19	ACTA2,ACTB,ACTC1,ACTG2,AMOTL2,ANKRD1,ARPC1B,BCL2L1,CCN1,CCN2,CCN5,CD44,CLDN15,CNN2,COMT,DDAH1,DNAJB4,EDN1,EGR1,EGR2,EGR3,EPCAM,EPHA8,EYA2,EZR,FABP3,FADS2,FLRT2,FN1,FOS,FSCN2,G0S2,ITGA11,ITGA2,ITGA5,ITGA6,ITGAV,ITGB1,LOX,MAFK,MAP2,MAPK13,MMP9,MYH9,MYLK,NFIB,NPPA,OSCP1,PGR,PRSS57,PTGS2,RUNX1,SELE,SEMA3D,SERPINB2,SLC1A2,SLC20A1,SORBS1,SULT1E1,SYNPO2,TAGLN,TAL1,TBX1,TBXAS1,TGFB2,THBS1,TNC,TPM2,TUBB1,…	985 (26)
SMAD4	0.341	transcription regulator	Activated	4.02	2.3e-20	ACAN,ACKR3,ACLY,AGR2,ALPL,ANGPT1,ANGPT2,ANGPTL4,APLN,APLNR,APOA1,AREG,ASCL1,BDNF,BGN,BMP5,CBS,CCL21,CCN2,CDH1,CDH3,CDH5,CDK17,CDK6,CDKN1A,CNMD,COCH,COL23A1,COL4A1,COL4A2,CSF1,CSF3,CTH,CTSD,CXCL14,CYB561,CYP17A1,DAPK1,DLX3,DSG2,EDN1,FAP,FASLG,FLT1,FN1,FOS,FSCN1,FST,GADD45B,GDNF,GJA1,HAS2,HGF,HHEX,HMGA2,HRH2,IGFBP2,IL12B,IL31RA,IL6,IL9,INHBA,INPP5D,ITGA6,ITGA9,ITGB1,ITGB3,LPAR1,MET,MMP1,MUC2,MYC,NL…	1084 (18)
HMG20A	-0.145	transcription regulator	Activated	3.96	6.39e-21	ATF3,ATP2A2,CALD1,CCN1,CCN2,CD44,CDH1,CHST2,CSF1,CX3CL1,DCN,ECM1,EDN1,ERRFI1,F3,FADS2,FGF2,GCH1,HBEGF,HMGCR,HMGCS1,HSD17B7,IGFBP4,IL6,INHBA,ITGA2,ITGA5,JUN,LIF,LY6E,MGP,MYC,MYLK,OSMR,PTPRE,SDC4,SGCD,SLC1A2,SLC7A1,SQLE,TACR1,TAGLN,TGFB1,TGM2,THY1,TIMP3,TNFRSF11B,VCAM1,VCAN,VEGFA	779 (12)
FOXL2	2.588	transcription regulator	Activated	3.705	3.51e-06	ATF3,CH25H,CHRNA9,CYP17A1,DLX3,FAS,FOS,FST,HRH2,IL6,INHBA,LIF,MAFF,MYB,NFATC2,NR4A3,PPARGC1A,PTGS2,PTHLH,RGS2,SERPINB2,SLC35F2,SOX4,SOX9	872 (22)
KLF6	2.945	transcription regulator	Activated	3.571	2.46e-16	ALOX5,ANGPTL4,ANXA5,ARID5B,ATF3,ATP2A2,BAK1,BCL2L1,CD44,CD82,CDH1,CDKN1A,CEBPB,CFLAR,CLCF1,CMKLR1,CYP1A1,EGR2,ESRRB,F10,GADD45B,GCH1,GFPT2,HIBCH,HK2,IGF1R,IL12B,IL6,ITGA5,ITGB3,ITGB8,IVD,LCP2,LGALS3,LPAR1,MCL1,MMP9,MMUT,MYC,MYD88,NFKB1,NFKBIE,NLRP3,NR2F1,NR4A1,OSMR,P4HA2,PDPN,PFKFB3,PHLDA1,PIM1,PLA2G7,PLAT,PLAU,PPARG,PTGS2,RARB,RARG,RHOB,RHOG,RIPK2,RNF19B,SDC1,SELE,SEMA4D,SERPINB2,SLC16A3,SOCS3,T…	661 (14)
TP53	0.175	transcription regulator	Activated	3.49	6.61e-30	ABCA2,ABCB1,ABCB6,ACACB,ACADL,ACE,ACLY,ACOX3,ACSF2,ACSL6,ACTA2,ACTB,ACTN1,ACTN4,ADAM12,ADAM8,ADORA2B,AHCY,AKAP9,AKR1B1,AKT3,ALDH18A1,ALDH1A2,ALK,ALOX5,AMOTL2,ANGPT1,ANGPTL4,ANK1,ANKRD1,ANTXR1,ANXA1,ANXA2,APC,APOA1,AQP3,AREG,ARL6IP1,ARPC1B,ASNS,ASS1,ASTN2,ATF3,ATG10,ATP1A1,AXIN2,BACH1,BAG3,BAK1,BCAS3,BCAT1,BCL2L1,BDNF,BHLHE40,BICD2,BIK,BIRC2,BNIP3,BTG2,BTK,C1QC,CA9,CALD1,CALU,CAP1,CAV2,CBS,CCN1,CC…	1159 (16)
HIF1A	0.913	transcription regulator	Activated	3.433	1.02e-22	ABCB1,ABCC8,ACADL,ACAN,ACE,ACTA2,ADIPOQ,ADORA2B,AFAP1L1,AGTR1,ALOX5AP,ANGPTL4,APLN,AQP9,ASNS,ATP2A2,AXIN2,BACH2,BCL2L1,BGN,BHLHE40,BIRC2,BNIP3,CA9,CCN1,CCN2,CCN3,CCR2,CCR7,CD36,CD44,CDCP1,CDH1,CDKN1A,CDKN1C,CEMIP,CHKA,CLDN1,CSF1,CTSD,CYP1A1,D2HGDH,DCN,DPF3,EDN1,EDNRA,EDNRB,EHD2,ELF3,ENTPD1,ERBB4,ERO1A,FAS,FHL2,FLT1,FN1,FOLH1,FOS,FSCN1,GABRB3,GADD45B,GCHFR,GJA1,HGF,HK2,HSPA4,IGFBP2,IL12B,IL15,IL6,…	954 (12)
NFKB1	1.626	transcription regulator	Activated	3.418	2.24e-12	A2M,ABCB1,ADAMTS4,AKR1B1,ANKRD1,BATF,BCL2L1,BHLHE40,BLK,BTG2,C3,CCL17,CCL4,CCN1,CCN2,CD44,CD82,CDKN1A,CSF1,CSF3,CX3CL1,DUSP1,E2F7,EGR1,ELF3,FAS,FASLG,FGG,FLNB,FN1,FOS,FSCN1,GADD45B,GFRA1,GJA1,GNPAT,GRK5,HAS2,IKBKE,IL12B,IL6,IRF4,LAMB3,LBP,MADCAM1,MCL1,MMP9,MX1,MYB,MYC,NFKB1,NR4A1,NR4A2,NR4A3,PDGFA,PIM1,PLAU,PLK3,PRKCD,PTGS2,PTPN6,RIPK3,SDC4,SELE,SLC25A4,SLC7A2,SOX9,SPI1,SYTL1,TERT,TGFB1,TLR2,TNFR…	1031 (13)
KDM3A	0.108	transcription regulator	Activated	3.355	6.26e-05	ACTA2,ARHGEF28,BHLHE40,CCN1,CCN2,EDN1,GDF15,KLF5,LOXL2,MMP9,MYC,PLOD2,PPP1R3C,TAGLN,TNC	694 (14)
EPAS1	0.833	transcription regulator	Activated	3.344	4.42e-19	ACLY,ACP5,ADIPOQ,ANGPT2,ANGPTL4,APLN,AREG,ARG2,BHLHE40,BNIP3,C1QA,CA9,CCN1,CCN2,CCN5,CCR2,CD36,CDCP1,CDK6,CDKN1A,CEBPB,CEMIP,CHKA,CIDEA,CKMT2,CLDN1,CYBRD1,EDN1,FABP1,FABP3,FABP4,FASLG,FGF2,FLT1,FN1,FOS,GADD45B,GCHFR,GJA1,GPT2,HMGCS1,HSPA4,IL2RB,IL6,INHBB,ITGAV,ITGB2,ITGB3,LOX,LOXL2,LPL,MAFF,MB,MYD88,MYO7A,MYOM2,NDRG1,NOS3,OMA1,PDGFB,PFKFB3,PGF,PKIB,PLOD2,PPARG,RASSF1,RGS4,RUNX2,SLC7A5,SOX9,SREBF1…	778 (18)
JUNB		transcription regulator	Activated	3.166	4.73e-08	ACLY,ATF3,BDNF,C1QB,C3,CD44,CD82,CFD,CFLAR,COMT,CSF3,DUSP1,E2F7,FBLN5,FN1,HK2,IBSP,IL12B,IL6,IL9,INHBA,ITGAV,ITGB3,LAMB3,LPAR1,MMP1,MMP9,MYL12A,NCF2,PENK,PIM1,PLAU,PPP2R2A,RASGRF1,RUNX2,SERPINB2,SLC7A1,TBX3,TGFB2,TIMP3,TNFRSF8	1037 (19)
NFATC1	0.449	transcription regulator	Activated	3.144	0.00568	ACP5,ATF3,B3GAT1,CYP1A1,EDN1,EGR3,FAS,FASLG,IL12B,IL6,ITGAV,ITGB3,MYC,MYH7,NOX4,PLS3,PPARG,PTGS2,RCAN1,SPP1,THBS1,VCAM1	967 (20)
PTTG1		transcription regulator	Activated	2.978	0.0379	ASNS,AXIN2,CD44,CDH1,CDKN1A,CEBPB,FGF2,MLH1,MYC,SRD5A2,TGFA,UNG,VEGFA,VIM
REL	1.166	transcription regulator	Activated	2.978	0.0014	AGA,BACH2,BCL2L1,C1QTNF12,CACNA1E,CDH1,CDKN1A,CRKL,DNAH1,EGR2,F3,FADS2,FAS,FN1,FOS,GADD45B,GPT2,HBEGF,IL12B,IL6,IL9,IRF4,IRF5,IRF6,JUN,JUP,MMP9,MYC,MYH7,NFKB1,NR4A1,NR4A3,PFKM,PLK2,PTGDS,RAP2A,SORBS1,TNFRSF10B,TNFRSF13B,TNFRSF4,VIM	855 (14)
CTNNB1	-0.399	transcription regulator	Activated	2.96	3.21e-26	ABCB1,ACADL,ACAN,ACAP1,ACLY,ACTA2,ACTB,ACTC1,ACTN4,ADGRV1,ADIPOQ,ADRA2C,ALDH1A2,ANXA1,APC,APCDD1,ARL4A,ASCL1,ASCL2,ASRGL1,AXIN2,BCL2L1,BDNF,BGN,BHLHE40,CA9,CACNA1G,CADM1,CBLN1,CCN1,CCN2,CCN4,CD34,CD36,CD44,CD99,CDH1,CDKN1A,CDKN1C,CEMIP2,CFD,CHGA,CIDEC,CLDN5,CNMD,CNN2,CNTFR,COL4A1,COL4A2,CRABP2,CRIP1,CRYBG1,CSF3,CX3CL1,CXCL14,CYP1A1,CYP24A1,DES,DIO1,DIXDC1,DKK2,DOK1,ECM1,EDAR,EDN1,EGR1,ENC1,ENTPD1…	1219 (19)
JUN	2.07	transcription regulator	Activated	2.92	7.29e-28	A2M,ABCB1,ACP5,ACTA2,AKT3,ANKRD1,ANXA1,ANXA2,ARHGDIB,ASNS,ATF3,BAK1,BCL2L1,BDNF,BIRC2,C1QB,C3,CAPN2,CCN1,CCN2,CCN3,CD247,CD44,CDH1,CDK5R1,CDKN1A,CFD,CFLAR,CHGA,COL24A1,COMT,CSF1,CSF1R,CSF3,CX3CL1,CYGB,CYP17A1,DUSP1,DUSP5,DUSP6,E2F7,EDN1,EHD4,EZR,F3,FABP4,FABP7,FAS,FASLG,FBLN5,FGF2,FN1,FOS,GDNF,GJA1,GNRH1,HK2,HMGA1,HOMER1,HSPB2,IBSP,IGF1R,IGFBP2,IGFBP4,IL12B,IL6,IL9,ITGAV,ITGB1,ITGB8,JUN,JUP,LAMB3…	1225 (19)
YBX1	-0.045	transcription regulator	Activated	2.917	2.08e-05	ABCB1,ACTA2,ALKAL2,BCL2L1,CCL26,CDH20,CDK6,CDKN1A,EFEMP1,EPHA2,F3,FGF2,FOS,HGF,HSD17B1,IL6,INHA,IRF5,KLF4,LGALS3,LHCGR,LRP2,MCL1,MKNK1,MMP1,MYC,PDGFB,PLXNA2,PTGS2,QSOX1,STC2,TGFB1,USP2	1014 (18)
MYB	3.887	transcription regulator	Activated	2.894	7.44e-09	ACAP1,ADAM12,ATF3,ATP2B1,AXIN2,BCL2L1,BHLHE40,C3,CBX4,CCL17,CCR2,CD34,CDH1,CELA2A,CNN3,COL4A1,CSF3,ESAM,FN1,HK2,IGF1R,IKBKE,IL6,JUN,KIAA1671,KIT,KLF4,LIF,MAFB,MEGF10,MMP1,MTSS1,MYB,MYC,NEDD9,NFKB1,NMU,P2RY13,PRAG1,PTGS2,RGCC,RGS8,SDC1,SDC4,SLC16A3,SPP1,TNFRSF9,TWIST1,VAV1,VIM	877 (14)
TEAD4	0.848	transcription regulator	Activated	2.87	1.34e-16	ACTA2,ADIPOQ,AK5,AMOTL2,ARID5B,CALD1,CAV2,CCK,CCN1,CCN2,CD34,CDH1,CDK6,CDKN1A,CIDEC,DES,EDN1,EDNRA,EOMES,FABP4,FILIP1L,FLT1,IL6,IRF6,JUN,KLF8,LATS2,MB,MMP9,MYH7,NUAK1,PDGFRL,PLK2,PPARG,PTPRO,RCAN1,SDC2,SESN2,TAGLN,TFAP2C,TFAP4,THBS1,TP63,TPM1,TRNP1,VCAM1,VEGFA,VIM	1082 (21)
ETS1	0.711	transcription regulator	Activated	2.853	1.43e-08	ABCB1,ARHGDIB,ATP2A3,BACH1,BCL2L1,CCN2,CD44,CD79B,CDH1,CDH5,CDK6,CDKN1A,CHAC1,CSF1R,CX3CL1,CYP24A1,EGR1,FASLG,FGFR4,FLT1,FN1,GP9,HGF,HSPB8,IL12B,IL2RB,INSIG1,ITGB2,ITGB3,ITGB6,LAMC1,MCL1,MET,MMP1,MMP9,MYB,MYC,NOS3,PGR,PHLDA2,PLAU,PTGS2,PTHLH,RUNX1,RUNX2,SCD,SPI1,SPP1,TBXAS1,TGFA,TGFB2,THY1,TWIST1,VEGFA,VIM	1042 (22)
TEAD2		transcription regulator	Activated	2.828	2.27e-07	AK5,ARID5B,CALD1,CCN1,CCN2,EDN1,EDNRA,FGFR4,FILIP1L,NUAK1,PDGFRL,PTPRO,SDC2,TAGLN,THBS1,TP63,TPM1,TRNP1,UHRF1	536 (7)
CCND1	0.649	transcription regulator	Activated	2.818	2.41e-08	AQP3,AREG,C7,CALU,CD44,CDH1,CDK6,CDKN1A,CLIC6,CPED1,DKK2,DONSON,DYNC1LI1,E2F7,ENDOD1,EPHA2,ERRFI1,GPRC5A,HACL1,HECTD2,HSPB8,ITGAV,ITGB3,ITGB6,IVD,KRT14,LASP1,LCORL,MAFF,MAP3K5,MBLAC2,MTMR1,MYBL1,MYC,MYLK,MYO7A,NIBAN2,PAH,PDLIM3,PDLIM4,PGR,PMEPA1,PPARG,PTBP3,RAB3B,RGS2,RHPN2,SCG5,SEC61B,SELENBP1,SLC4A4,SLC9B2,SOX11,SOX4,SPP1,ST6GALNAC1,TAPT1,TGFB3,TMEM17,TMPRSS2,TOR3A,TUBB1,UAP1,UHRF1,VPS13D,WNT7A…	882 (18)
NFATC3	0.217	transcription regulator	Activated	2.818	1.59e-05	ACAN,ACTA2,ANGPT1,ATF3,B3GAT1,CASP10,EDN1,EGR2,EGR3,F3,FASLG,FOS,IL12B,IL6,JUN,MUC2,NR4A1,PPARG,PRKD3,PTGS2	671 (16)
SP1	0.247	transcription regulator	Activated	2.807	2.16e-24	ABCB1,ABCC8,ACTA2,ADRA1B,AFAP1L1,AGTR1,ALOX5,ALPL,ANK1,APOA1,ASNS,ASS1,ATF3,ATP2A2,ATP2A3,BDNF,CBS,CCN2,CD55,CD79B,CD99,CDH1,CDH5,CDK6,CDKN1A,CEBPB,CHGA,COL8A1,CRABP2,CRYAB,CRYBB1,CTH,CTSD,CYBRD1,CYP17A1,CYP26A1,DIAPH2,DLX3,DRD1,EGR1,EZR,F10,F3,FADS2,FAS,FASLG,FGF10,FGF2,FGFBP1,FGFR4,FLT1,FN1,FOS,GABRA4,GDF15,GJA1,GSDME,HAS2,HBE1,HBEGF,HBZ,HGF,HK2,HMGA1,HMGCR,HSD17B1,HSD17B7,IGF1R,IGFBP4,IL12RB2,…	1184 (23)
E2F3	1.032	transcription regulator	Activated	2.806	0.0994	AKNA,ARPC1A,BAIAP2L1,CAV2,CDKN1A,EDN1,ELF3,FBLN5,FGF2,FST,INHBA,KRAS,LAMA4,LPL,MCM3,MEX3A,MLH1,MYB,MYC,PTN,RBPMS,TERT,THBS1,TIMP3,TNFAIP2,WFDC2
MECOM	0.092	transcription regulator	Activated	2.786	0.00186	BCL2L1,CDKN1A,CDKN1C,DCN,GATA2,HSPB7,ITGA6,ITGB3,SCUBE3,SOX9
ECSIT		transcription regulator	Activated	2.772	0.00524	CD44,CFLAR,IL6,NFKB1,NFKBIE,NR4A2,PIM1,PTGS2	504 (11)
NCOA3	0.066	transcription regulator	Activated	2.751	2.07e-05	ANKRD1,CCN1,CCN2,CD44,CDKN1A,CYP1A1,EOMES,ESRRB,FGF2,HK2,HOXA1,IGF1R,MCL1,MMP9,MUC2,NR0B1,PARD6B,PGR,PPARG,PTGS2,RARB,SLC16A3,SREBF1,TAGLN,TGFB2,VEGFA	992 (20)
NFKB2	0.494	transcription regulator	Activated	2.748	0.000144	AKR1B1,ALDH1A2,ANXA5,BCL2L1,CCDC141,CCR7,CD34,CDKN1A,CFLAR,COCH,CTSS,CX3CL1,DPT,FAP,FOS,GDF6,IGFBP4,IRF4,KRT7,LMCD1,MADCAM1,MAF,MCL1,MMP9,MYB,MYC,PAMR1,PHLDA2,PPARGC1B,PTGS2,RAB3B,TNFAIP2,UPK1B,VCAM1	679 (15)
ETV1	1.124	transcription regulator	Activated	2.739	1.33e-05	ASCL1,BHLHE40,CCL26,HSD17B7,ITGAV,ITGB3,MET,MMP1,SOX9,TERT,TMPRSS2,TWIST1,VIM	420 (7)
TEAD3	-0.11	transcription regulator	Activated	2.714	2.36e-09	ACTA2,AK5,AMOTL2,ARID5B,CALD1,CCN1,CCN2,DES,EDN1,EDNRA,FILIP1L,LATS2,MYH7,NUAK1,PDGFRL,PTPRO,SDC2,TAGLN,THBS1,TP63,TPM1,TRNP1
FOS	2.608	transcription regulator	Activated	2.71	7.8e-29	A2M,ABCB1,ACP5,ADAM12,AFF4,AKR1D1,APLN,AQP3,ATF3,B4GALT1,BCAR3,BDNF,C3,CADM1,CALU,CAPN2,CCN2,CCNJL,CD44,CDH1,CFD,CFLAR,CHGA,CHODL,COL16A1,COL8A2,CRABP2,CSF3,CTH,CYP17A1,DRD1,E2F7,EDN1,EGR1,EGR2,ENAH,EZR,F3,FABP4,FARS2,FASLG,FBN1,FGF2,FHOD1,FLRT2,FMN1,FN1,FOS,GAK,GJA1,GJB6,HAS2,HK2,HOXA1,HPGDS,HSPB8,HTATIP2,IBSP,IKZF1,IL12B,IL6,IRF4,ITGA2,ITGA6,ITGB1,JUN,KIRREL3,KLF6,KRT13,LAMB3,LGALS3,LOX,LPL,LRP…	1014 (17)
NRIP1	0.965	transcription regulator	Activated	2.683	0.000125	ACACB,APOA1,AREG,CD36,CDKN1A,CIDEA,CYP1A1,FABP3,HAS2,IL6,PDK2,PDK4,PGR,PPP1R3B,PTGS2,RARB,SLC25A19,TNFAIP6	1267 (24)
ARID3A	-0.051	transcription regulator	Activated	2.668	0.0015	CRABP2,DSG2,FGF2,GJA1,HOMER1,ITPR3,KIF5C,LRRN1,PIK3CB,PRKD3,RABGAP1L,RAD51AP1,ROBO1,SINHCAF,SLC38A1,SLC39A10,TENT5B
ARNT	-0.85	transcription regulator	Activated	2.631	3.34e-09	ALOX5AP,ANGPTL4,AREG,ARID5B,BATF,BHLHE40,BLK,BNIP3,CA9,CCR7,CDCP1,CEBPB,CLDN1,CRYAB,CSF3,CTSD,CYP1A1,DPF3,EDN1,ERO1A,FLT1,GADD45B,GDF15,HGF,HK2,IL1R1,ITGAV,ITGB3,LOXL2,MAFB,MYC,MYO1C,NFATC2,NOS3,PGM2,RGS5,SOCS3,SPP1,TDO2,TNFRSF19,TNFRSF9,VEGFA,VEGFD,VIM	1146 (22)
KLF4	3.675	transcription regulator	Activated	2.606	1.2e-18	ACTA2,ACTC1,AKR1E2,ALPL,ANGPT1,APCDD1,ASCL1,ATP2A2,BCL2L1,CCN3,CD34,CD44,CDH1,CDKN1A,CDKN1C,CEBPB,CLDN1,COL8A1,CRABP2,CSF1R,CYP17A1,CYP1A1,CYP26A1,DLX3,DUSP1,DUSP4,DUSP5,EFEMP1,EOMES,EPCAM,EPHA2,ESRRB,EVPL,EYA1,FABP1,FLT1,FN1,GBX2,GDF15,GDF3,GRHL3,HAND1,HBEGF,HEY2,IBSP,IER5,IL15,IL6,INHBA,IRF6,KLF4,KLF5,KRT13,KRT14,KRT17,KRT7,MEF2C,MMP9,MUC2,MYC,MYD88,MYH7,NOS3,NPPA,PDLIM3,PLAT,PRKG1,RCAN1,RUNX2,…	1000 (19)
EGR1	1.63	transcription regulator	Activated	2.551	1.15e-15	ABCB1,ACE,ACTA2,ALOX5AP,APOA1,ARC,AREG,ATF3,ATP2A2,BDNF,CCL21,CCR2,CD44,CDH1,CDK5R1,CDK6,CDKN1A,CDKN1C,CHGA,CHGB,CSF1,CYP17A1,DUSP4,EGR1,EGR2,ENPEP,F3,FAS,FASLG,FGF2,FLT1,FN1,GADD45B,GDF15,GDNF,HBEGF,HMGCR,IGF1R,IL6,JUN,JUND,KCNT1,LHCGR,MAOB,MMP9,MYB,MYBL1,MYC,NDRG1,NFKB1,NR4A1,PCSK2,PDGFA,PDGFC,PLAU,PPARG,PTGS2,SPP1,SQLE,TGFB1,TGFB2,THBS1,TWIST1,VCAM1,VEGFA	1244 (19)
NOTCH1	-0.069	transcription regulator	Activated	2.517	2.85e-17	ACTA2,ANGPT1,ANKRD1,AQP3,AREG,ASB2,ASCL1,BCL2L1,BIRC2,CCN1,CCN2,CD44,CD82,CDH1,CDKN1A,CDKN1C,CEBPB,CFD,CFLAR,CHGA,CHST1,CSF1R,DES,EFNB2,ERBB3,FABP7,FGF2,FLT1,FOS,GAA,GATA2,GJA5,HBA1,HEY2,HK2,HSPH1,IGF1R,IGFBP2,IGFBP4,IL12B,IL6,IL9,ITGA6,ITGB1,KRT14,LFNG,LOX,MMP1,MUC2,MYC,MYH7,MYLK,NCF4,NFKB1,NGFR,NHLH1,PDGFB,PFKFB3,PPARG,PPARGC1A,PRAG1,PROX1,PTGDS,PTGS2,RGS5,RLBP1,RND3,RUNX2,SELE,SPI1,SPP1,SPRY2,…	956 (14)
ETS2	0.907	transcription regulator	Activated	2.504	2.11e-05	BCL2L1,CD34,CDKN1A,CSF1R,CSF3,DUSP6,ESRRB,FGF1,FLT1,FOS,IL12B,JUN,MKX,MMP1,MMP9,MYC,PCSK6,PLAU,PTHLH,SPP1,TERT	973 (21)
ELF3	-1.966	transcription regulator	Activated	2.491	0.000117	ADIPOQ,ANGPT1,ANGPTL4,ELF3,FABP4,FN1,FOLH1,IL12B,IL6,MET,NFKB1,PPARG,PTGS2,TIMP3	866 (14)
BHLHE40	1.816	transcription regulator	Activated	2.488	2.72e-16	ACTA2,ACTN1,ADORA2B,AFF3,ALOX5,ANXA1,ATF3,ATP2A2,BCL10,BCL2L1,BDNF,BHLHE40,CALCA,CCN4,CCR7,CD82,CNP,CRABP2,CSF3,CTSS,CYP3A4,DMBT1,ECM1,EOMES,ERO1A,FAS,FGL2,GCH1,GFPT1,HBEGF,HK2,HOMER1,IL12RB2,IL2RB,IL2RG,IL6,INHBA,IPCEF1,IRF5,ITGA6,KCNA3,KIT,LCP2,LIF,LOX,LPAR1,MAFF,MARCO,MEF2C,MET,MLH1,MMP9,MYB,MYOD1,NCF4,NDRG1,NLRP3,PARP9,PDPN,PFKFB3,PHLDA1,PPP2R3A,PTGS2,PTPN6,RASGRP1,RIPK2,RND3,SAMHD1,SAP30,SDC…	1079 (16)
FOXS1		transcription regulator	Activated	2.443	1.19e-08	ACTA2,ADIPOQ,CD36,CDH1,CEBPB,FABP4,FBN1,FN1,INHBA,ITGA2,JUN,LRRC15,MYC,PDLIM4,PIM3,PPARG,SCG2,SOWAHC,TAGLN,TPM1,TPM2,VIM	803 (15)
NCOA2	-0.23	transcription regulator	Activated	2.415	2.71e-09	ABCB11,ADIPOQ,APC,BAZ2A,C3,CCR7,CDH1,CDKN1A,CEBPB,CFD,CHST1,CYP17A1,CYP1A1,EGR1,ESRRB,FABP4,FST,GLIS1,HMGCR,HMGCS1,IL6,IRF4,KLF4,LAMC3,LIF,LIPG,LPL,MICALL2,MX1,MYB,NOS3,NR4A2,NR4A3,P2RY12,P2RY13,PARD6B,PCSK5,PGR,PPARG,PPP1R3B,PPP1R3C,PPP2R2B,PTGS2,RARG,RGS2,SOD3,SREBF1,TMEM100,WNT7B	1188 (25)
EGR2	4.032	transcription regulator	Activated	2.412	4.7e-06	ACTN1,ASS1,ATF3,BAK1,BHLHE40,CALCA,CBLB,CDKN1A,CEBPB,CHKA,CHRNA7,CISH,CNTFR,CSF1R,DMBT1,EGR1,EGR2,FASLG,FGF2,FOS,GDF15,GSN,HMGCR,HMGCS1,HOMER1,IL9,ITGB1,ITGB3,JUN,LMO7,MAP2,MAP7,MAPK8IP1,MME,MYB,MYC,NDRG1,NGFR,PIM1,PRKCD,PRODH,PSD,PTHLH,RARG,RFLNB,ROBO1,SLC1A3,SOCS3,SQLE,SYTL1,TGFB3,TJP2,TNFRSF8,VEGFA,XKRX	949 (17)
NSD2	0.227	transcription regulator	Activated	2.401	0.0149	BTG2,FOS,GLS2,ITGB1,JUN,MX1,ROCK2,RRAS,TWIST1,VEGFA
CEBPB	2.293	transcription regulator	Activated	2.395	1.28e-09	ABCB1,ACTA2,ADIPOQ,ALDH1A2,ALOX5AP,ANTXR1,APCDD1,APLN,APLNR,ARL6,ASNS,BASP1,BCL2L1,BDNF,C1QA,C1QC,C3,CCL4,CDH3,CDKN1A,CDO1,CEBPB,CFD,CSF1R,CSF3,CYP17A1,CYP24A1,CYP3A4,DAPK1,DCN,DLX3,EFNB2,ENTPD2,FABP4,FAS,FHL2,FKBP6,FN1,FOS,FZD8,GABARAPL1,GDF15,GINS3,GLIPR2,HAS2,HGF,HMGA1,HPX,IGFBP4,IKBKE,IL12B,IL1R1,IL1RAP,IL6,INHBA,IRF4,IRF9,JUN,KL,KLF5,LAMC1,LBP,LCP2,LHCGR,LY96,MCL1,MCM3,MGP,MLH1,MMP1,MX1,MYC,…	1041 (20)
PDX1		transcription regulator	Activated	2.384	1.65e-08	ABCC8,ACTB,AKR1B1,ALDOB,ANXA2,ARRDC4,ASNS,ATF3,ATP2A2,ATP2A3,CD44,CDO1,CHGB,CX3CL1,DUSP5,DUSP6,EDEM3,EGR1,EPHB1,ERO1A,F3,FBXL17,FGF1,FGF2,GCH1,IGF1R,IL6,INSIG1,JUN,KLF6,LRRC49,MAOA,MAOB,MAP2,MAPK8IP1,MYC,NFKB1,NPTX2,PCSK2,PPP2R2C,RABGAP1L,SCG2,SEZ6L,SPP1,TRPC6,UCN3,XKR4	929 (18)
MAZ	-0.373	transcription regulator	Activated	2.38	0.00855	ATF3,CCL26,CDKN1A,CX3CL1,FGG,IL15,KRAS,MMP1,MMP9,MYC,PPARG	987 (18)
CEBPD	0.552	transcription regulator	Activated	2.37	5.2e-05	ALOX5AP,ASNS,C3,CDK6,CDKN1A,CDKN1C,CEBPB,CSF1R,FABP4,FGF1,FN1,FOS,HGF,HK2,IKBKE,IL6,ITGAV,KLF5,LAMC1,MYC,NGF,NOX1,PDGFA,PPARG,PTGS2,TGFB1,TNC,TNFAIP6,VLDLR	994 (22)
STAT4	1.564	transcription regulator	Activated	2.342	1.14e-06	ACADL,ACAP1,ARHGAP15,BCL2L1,BHLHE40,C3,DNAJB6,ERO1A,ERRFI1,FSCN1,FYB1,GJA1,GRTP1,IL12RB2,IL6,IRF4,ITGA7,KCNK7,MATK,MGARP,MTHFS,MUC2,MX1,MYC,NDRG1,NXN,P4HA2,PCGF5,PKP2,PLOD2,RASL12,RASSF1,RGCC,RNF128,RNF130,SAT1,SCG5,SELE,SMURF2,SOCS3,STC2,STK32C,SYPL1,TGFA,TGFB3,TWIST1,VEGFA,VLDLR	853 (16)
MYC	1.444	transcription regulator	Activated	2.339	7.4e-15	ABCA2,ACAN,ACLY,ACTA2,ACTB,ACTN1,ACTN4,AFF4,AHCY,ALDH18A1,ALDOB,ALOX5,ANGPT1,ANGPT2,ANGPTL4,ANXA5,APCDD1,ARHGAP22,ARHGEF1,ARL6IP1,ASCL1,ASCL2,ASNS,ASS1,BCAT1,BCL2L1,BDNF,BIN1,BIRC2,CALD1,CAPN2,CASP10,CBX4,CCN4,CD44,CD48,CD55,CDH1,CDK6,CDKN1A,CDKN1C,CFLAR,CHKA,CIDEC,CLDN1,CLUH,CNBP,CNP,COL14A1,COL4A1,COL4A2,COL8A1,CRABP2,CRIP1,CRYAB,CSDC2,CSF1,CSF1R,CSPG4,CSRP2,CTNNAL1,CTSD,CYP26A1,DBN1,DHODH,DLX3…	1071 (21)
SREBF2	0.995	transcription regulator	Activated	2.334	0.00136	ACLY,AREG,BHLHE40,CCN1,CCN2,CDKN1A,FABP5,FABP7,FADS2,HMGCR,HMGCS1,HSD17B1,IL6,INSIG1,KLF6,LRP2,MSMO1,MX1,NLRP3,PPARG,SQLE,SREBF1,VCAM1	946 (19)
RELA		transcription regulator	Activated	2.329	1.27e-19	A2M,ABCB1,ACTA2,ACTN4,ADAMTS4,ALOX5AP,ALPK2,ANKRD1,ARHGDIB,ASCL2,BACH2,BCL10,BCL2L1,BHLHE40,BIRC2,BTG2,C3,CBS,CCN2,CCR7,CD44,CDH1,CDKN1A,CEBPB,CEMIP2,CRYAB,CX3CL1,CYP17A1,CYP1A1,CYP3A4,DOCK8,DUSP1,EDN1,EGR1,ELF3,EOMES,EPCAM,F3,FAS,FASLG,FGF10,FGF2,FMN2,FN1,FOS,FSCN1,GCH1,GDF15,GNPAT,GRK5,HAS2,IGF1R,IGFBP2,IKBKE,IL12B,IL15,IL16,IL6,IL9,INHBB,IRF4,JUN,KIT,LUM,MADCAM1,MMP1,MMP9,MX1,MYB,MYC,MYOD1,NFA…	1008 (14)
KLF5	3.225	transcription regulator	Activated	2.317	3.23e-07	ACTA2,BCL2L1,CD34,CD44,CDH1,CDKN1A,CHKA,CSRNP1,DUSP1,EGR2,EPHA2,FGFBP1,HHEX,IL6,JUN,KLF5,MAFF,MMP9,MYC,NIBAN2,NR2F1,PDGFA,PDGFB,PPARG,PPP1R1B,PTGS2,RUNX1,SLC7A5,SMAD7,SOX4,TAGLN,TGFB1,TWIST1	997 (18)
SMARCA2	-0.33	transcription regulator	Activated	2.279	0.00163	ALPL,BMPR1B,CD36,CD44,CDH1,CDKN1C,DES,IL6,LAMC2,MEF2C,MSX1,MYLK,PHEX,PPARG,TAGLN,TUFT1	1004 (23)
HSF1	0.415	transcription regulator	Activated	2.262	1.2e-08	ABCB1,ABI3BP,ACADL,ACLY,BAG3,BCL10,BCL2L1,CCN2,CCR2,CD36,CDH1,CEBPB,CFLAR,CKS1B,CRYAB,CSF3,CSRP2,DNAJA4,DNAJB6,DPT,EFEMP1,FASLG,FGF1,FMOD,GABRA4,HSPA4,HSPB2,HSPB8,HSPH1,IGFBP4,IL6,INHBA,INHBB,JUN,KCNF1,LAMA4,LIF,LPL,MADCAM1,MCL1,MCM3,MLH1,MYH7,NFATC2,NFKB1,PDZD2,PPARG,PPARGC1A,SEMA3C,SGO2,SLC44A5,SREBF1,THBS2,TRAF3,TTR,VCAM1,VCAN,VIM,ZFAND2A	1093 (18)
ELK1		transcription regulator	Activated	2.258	5.99e-07	BCL2L1,CDKN1A,EGR1,EGR2,EGR3,EGR4,FOS,ITGAV,ITGB1,ITGB6,JUN,MCL1,MMP9,MYLK,NR4A1,PRKN,PTGS2,RUNX2,SOCS3,SPP1,TAGLN,TERT,THBS1,TNFRSF10B,TPD52L1	1150 (23)
HOXB9	0.184	transcription regulator	Activated	2.233	0.0447	AREG,FGF2,SMURF2,TGFB1,TGFB2
SMAD2	-0.145	transcription regulator	Activated	2.226	4.68e-10	ABCB6,ACAN,ACTA2,ADAM12,ALPL,BGN,CCN2,CDH1,CDH5,CDKN1A,CEBPB,CKS1B,CRISPLD2,DAPK1,FLT1,FN1,GADD45B,HAS2,HHEX,IL6,IL9,INPP5D,IRX1,ITGB1,MET,MMP9,NOS3,PDGFB,PTHLH,RUNX2,SELE,SMAD7,SYT2,THBS1,TIMP3,TPM1,TPM2,TPM3,VEGFA,VIM	1128 (18)
CREBBP	-0.172	transcription regulator	Activated	2.226	1.44e-23	ADAM12,AMHR2,ANGPT1,AQP11,ARID5A,BDNF,CAMK1G,CCL26,CCN1,CCR7,CD44,CDCP1,CDH1,CDH5,CDKN1A,CNN3,CRIM1,CRISPLD2,CSF1,CYP24A1,DCX,DNAJB4,DUSP1,DUSP4,EGR1,EGR2,EGR3,EHHADH,EOMES,ESAM,EVL,EYA2,FABP4,FASLG,FGF2,FMNL2,FNDC3B,FOS,FOSL2,GFRA1,GRIA3,GRIN2C,HAS2,HMGCS1,IGF1R,IL2RB,IL6,INHA,IRF6,ITGA6,ITGA9,JUN,JUND,JUP,KCTD1,KLF2,KRT14,LPL,MAF,MCF2L,MCM3,MDM1,MEF2C,MFHAS1,MLH1,MMP9,MSX1,MYC,MYH7,MYO1F,MYOD1,…	925 (19)
PKNOX1	0.496	transcription regulator	Activated	2.219	0.0188	FABP7,FGF2,GNRH1,IL6,PLAU,PPARGC1A,VEGFA
RUVBL1	-0.119	transcription regulator	Activated	2.219	0.337	AXIN2,GADD45B,MCM3,MNX1,SESN2,SOCS3
SP4	-0.393	transcription regulator	Activated	2.208	0.000247	ARC,CCL26,CDKN1A,FLT1,GABRA4,IGF1R,IL15,IL2RB,LHCGR,MYH7,NFKB1,PRKCD,TNFSF15,VEGFA	633 (7)
GLI3	0.223	transcription regulator	Activated	2.205	1.38e-07	ACTA2,ALDH1A2,DLX2,DUSP1,DUSP5,EGR1,FGF10,FGF19,GNRH1,GREM1,HAND1,HBE1,IL6,KLF2,KRT17,LAPTM5,MRAS,OSR1,PCDH8,PTHLH,RAB34,RUNX1,RUNX2,SFRP1,SOX9,SPRY2,STK32C,TAL1,TBXT,TERT,TGFB2,WNT5A	858 (7)
EP300	0.383	transcription regulator	Activated	2.203	1.12e-18	ACACB,ACADL,ACTA2,ADAM12,ADIPOQ,AMHR2,ANGPT1,AQP11,ARID5A,AXIN2,BCL2L1,BTK,CCR7,CD36,CDCP1,CDKN1A,CFLAR,CHKA,CNN3,COMT,CRABP2,CRIM1,CRISPLD2,CSF3,CYP1A1,DIO1,DNAJB4,DUSP1,DUSP4,EDN1,EGR1,EGR2,EVL,EYA2,FABP4,FASLG,FMNL2,FN1,FNDC3B,FOS,FOSL2,GFRA1,HK2,HMGCR,IGF1R,IL1R1,IL6,IL9,IRF6,ITGA6,ITGA9,ITGB2,JUN,JUP,KCTD1,KRT14,LAMC2,MAF,MCF2L,MCL1,MCM3,MDM1,MEF2C,MET,MFHAS1,MME,MMP1,MMP9,MSX1,MYC,MYO1F,NDR…	917 (17)
NOTCH2	0.487	transcription regulator	Activated	2.192	0.000115	ACP5,ACTA2,ASCL1,CD44,CDH1,DES,EPCAM,FN1,HEY2,IL6,ITGB2,LHCGR,MARCO,MUC2,PDGFA,PRAG1,RGS5,SDC2,SOX9,TAGLN,VAV1,WNT16	702 (16)
ELK4	0.181	transcription regulator	Activated	2.19	0.101	EGR1,EGR2,EGR3,FOS,NR4A1
NFKBIZ	0.508	transcription regulator	Activated	2.176	0.00359	ADAMTS4,BATF,CCL17,CSF3,ELF3,IL12B,IL6,MICALL2,NTNG2,PFKFB3,SH3BP5	552 (12)
FLI1	0.73	transcription regulator	Activated	2.17	0.0171	CCN2,CSF1R,CSF3,EGR1,ERG,GP9,INPP5D,LOX,MMP1,MYC,RARB,SRC,TNC,VEGFA
ZMIZ2	-0.625	transcription regulator	Activated	2.167	0.00287	AXIN2,CD44,JUN,MYC,NFATC2
HAND2	0.711	transcription regulator	Activated	2.166	1.95e-06	ABRA,ACTC1,ALX4,ATP2A2,CCBE1,DES,ECM2,FAP,GJA1,GJA5,GREM1,HAND1,HSPB7,IL6,MSX1,NFATC2,NPPA,PDLIM3,PTGS2,SIK1,TPM1
TCF7L2	0.597	transcription regulator	Activated	2.162	4.84e-20	ACADL,ADAMTS4,AGO3,ALDH1A2,ALOX5,AMHR2,ANXA1,APCDD1,AQP3,AQP9,ARHGDIB,ARHGEF26,AXIN2,BIN1,CAP1,CCDC3,CCN2,CCN5,CD44,CDKN1A,CDKN1C,CEMIP2,CNP,CREB3L2,CREB5,CSF3,CSRP1,CTNNAL1,DBNDD2,DRAM2,DUSP15,EDN1,EHHADH,ENC1,EPCAM,EPHB1,ERBB3,FABP1,FABP4,FBP1,FBP2,FGF1,FGF19,FMNL2,FN1,FOS,GJC2,GSN,HSPA2,IGFBP2,IL1RAP,JUN,KCNJ3,LAMC2,LBH,LRRN1,MAL,MAP4K4,MAP7,MDH1B,MET,MMP1,MOBP,MUC2,MYB,MYC,NDE1,NFASC,NINJ2,NK…	910 (20)
ATF3	4.231	transcription regulator	Activated	2.141	0.0197	ADIPOQ,ASNS,ATF3,CD82,CDKN1A,CHAC1,CX3CL1,DHODH,FBP1,GSN,HSPB2,IL12B,IL6,JUN,KL,MMP1,PENK,PSAT1,RIPK2,RIPK3,SELE,SLC11A1,TLR2,TNFRSF10B
E2F1	0.771	transcription regulator	Activated	2.138	1.29e-05	ABCB1,ACADL,ACAN,ACTA2,ADIPOQ,AGR2,ALPL,ANGPT2,BAK1,BCL2L1,BNIP3,CALD1,CCNO,CD2AP,CD44,CDH1,CDK6,CDKN1A,CDKN1C,CFLAR,CRABP2,CRKL,CRYAB,DUSP1,DUSP10,DUSP4,EGR1,EGR2,EGR4,EYA2,EYA4,FAS,FGF13,FGF2,FLT1,FOS,FOSL2,GNG4,HMGA1,JMY,KCNA3,KIF23,KIT,KRAS,KRT14,MAF,MAP3K5,MCL1,MCM3,MLH1,MMP1,MMP9,MYB,MYC,MYH7,MYH9,NR4A1,NR4A3,PDK4,PHF21B,PLK2,PPARG,PPARGC1A,PRKAA2,PRPS2,PSAT1,RFC2,RND3,ROCK2,SELE,SERTAD2,SF…	1001 (20)
TWIST1	4.307	transcription regulator	Activated	2.134	3.13e-14	ACAN,ACTA2,C1QTNF1,C3,CCDC3,CCK,CCN4,CD44,CDH1,CDKN1A,CHRDL1,CHRDL2,COL4A1,DCN,DDR2,DPYSL3,EFNB2,ENPP3,EPCAM,FAS,FGF10,FMOD,FN1,FOS,FREM2,GDF3,GSN,HEG1,IGFBP4,IL6,IRF5,IRF9,ITGA8,ITGB3,KIT,KLF4,LGALS3,MET,MME,MMP1,MMP9,MX1,MYC,OASL,OSGIN1,PAM,PAMR1,PDZD2,PPARGC1A,RUNX2,SLC28A3,SPP1,TF,TGFB1,TGFB2,TGFBI,THBS2,TIMP3,TNFRSF21,VCAN,VEGFA,VIM,ZYX	1075 (22)
FOXM1	-0.56	transcription regulator	Activated	2.128	0.000242	ACE,ACTA2,ANXA1,AXIN2,CD44,CDH1,CDKN1A,CKS1B,CSF1,CTNNAL1,FLT1,FN1,FOS,HEY2,IL6,ITGA5,ITGAV,ITGB1,JUN,KIF23,LAMA4,LOX,MET,MMP9,MYC,NDE1,NFKB1,PDGFA,PTCH2,SFRP1,STING1,TWIST1,TWIST2,VCAN,VEGFA,VIM	1035 (20)
TAF4B	0.693	transcription regulator	Activated	2.121	1.67e-05	CCN2,FASLG,FN1,FST,INHA,INHBA,INHBB,ITGA6,JUN,SPP1,TGFB1,TGFB3
TBX5	-3.092	transcription regulator	Activated	2.086	1.44e-05	ACTC1,ANKRD1,ATP2A2,CCBE1,DES,ECM2,FAP,FGF10,GJA1,GJA5,HEY2,HSPB7,IL6,MEF2C,NFATC2,NPPA,PDLIM3,PTGS2,SIK1,TBX5,TPM1,VIM	689 (20)
ZEB1	0.671	transcription regulator	Activated	2.035	1.26e-05	ABCB1,ANKRD1,CCN1,CCN2,CCR2,CDH1,EDN1,F3,FADS2,FAS,FN1,HK2,KIT,LAMC2,LOX,LOXL2,MAP1B,MMP1,MMP9,NFKB1,PLAU,PTGS2,RAB3IP,RASSF1,S100A10,TF,TGFBI,THBS1,TNFRSF10B,TP63,UBQLN1,VIM	1039 (21)
RELB		transcription regulator	Activated	2.029	2.85e-05	ABCB1,ACKR3,ALDH1A2,ANXA5,BCL2L1,CACNA1E,CARMIL1,CDKN1A,CHKA,FMN1,FSCN1,FYB1,HSPG2,IGSF3,IL12B,IL6,IRF4,MADCAM1,MICAL3,MYB,MYC,MYO1B,NDRG1,PPARGC1B,PPFIBP2,PPP1R12B,PTGS2,STAT4,TGFA,TNFAIP2,TRAF3	769 (16)
SOX30		transcription regulator	Activated	2.019	0.333	CDKN1A,CYP17A1,DNAJA4,DPYSL3,FHL5,FOXL2,RSPO1,SOX9
HMGN5	-0.478	transcription regulator	Activated	2	0.236	CCL21,TNNC2,TNNI2,TNNT3,TPM2
HES3		transcription regulator	Activated	2	1	FAM171B,PSPC1,TUBA1A,UNC79
IRX2	3.069	transcription regulator	Activated	2	0.000451	EGR1,IRX2,PDGFA,PDGFB,TGFB3
HIRA	0.515	transcription regulator	Activated	2	0.0704	EFNB2,FLT1,PGF,PLXDC1
ATF7	-0.508	transcription regulator	Activated	2	0.00093	DUSP1,DUSP10,DUSP5,DUSP8,SELE	253 (5)
CBX3	0.024	transcription regulator		1.994	0.0564	BCL2L1,CDH1,CDKN1A,HBE1,ITGA7,MYC,PRKN,VIM
ZBTB17	0.733	transcription regulator		1.982	0.0414	BHLHE40,CDKN1A,CDKN1C,CRLF1,EDA2R,EGR1,IQGAP3,JUN,KIT,NGFR,OSMR,RRM2B,SGO2,TNFAIP2
PAX4		transcription regulator		1.981	0.288	BCL2L1,MYC,NOX4,VIM
SAP30	1.295	transcription regulator		1.98	0.0052	ADM2,CLDN1,LHCGR,PDGFB
THRAP3	-0.163	transcription regulator		1.974	0.146	ADIPOQ,CFD,HAS2,RUNX2,ULK1
MEF2C	-1.427	transcription regulator		1.974	5.4e-21	ABRA,ACTA2,ACTC1,ACTG2,ARC,ATF3,ATP1B4,ATP2A2,BACH2,BDNF,BLK,CA10,CCBE1,CCR2,CDKN1A,CERS3,COL19A1,COL4A3,COL9A1,DES,ECM2,EGR2,EPHB1,FABP7,FAP,FBP1,FOS,GJA1,GJA5,GNRH1,HOXB5,HOXD3,HSPB7,IBSP,IKZF1,IL6,IRF4,ITGA2,ITGA7,JUN,JUND,KCNA4,KLF2,KLF4,LMOD1,MEF2C,MOBP,MYH7,MYL1,MYOD1,MYOM2,MYOZ1,NAV3,NFATC2,NPPA,NR2F1,NR4A1,NR4A3,PCSK5,PDLIM3,PLP1,PPARGC1A,PTGS2,RAB44,RUNX2,SFRP2,SIK1,SMYD1,TAGLN,TBX18,TBX…	1100 (25)
GABPA	0.069	transcription regulator		1.942	0.0613	BCL2L1,FAS,IL16,ITGB2,OXTR,PPARG,RRAS,SOD3,SPI1,TERT,TNC,VCAM1
TGIF1	1.97	transcription regulator		1.941	0.13	DRD1,IL6,RARB,STRA6,XCL1
ATF6		transcription regulator		1.93	0.0458	ATP2A2,CEBPB,CHKA,DAPK1,FOS,IL6,MBTPS2,MCL1,MMP1,NPPA,NUCB2,PLAT,RCAN1,TNFRSF10B,VEGFA
NFKBIA	0.709	transcription regulator		1.917	1.05e-20	A2M,ACKR3,ANKRD1,APOA1,ASCL2,BCL2L1,BIRC2,BNIP3,BTG2,C3,CCL21,CD44,CD82,CDH1,CDH3,CDKN1A,CDKN1C,CEBPB,CFLAR,CH25H,CKS1B,CRYAB,CSF1,CSF3,CX3CL1,DCN,DUSP6,EOMES,ERO1A,F3,FAS,FASLG,FGF2,FGFR4,FHL2,FN1,FOS,FSCN1,GADD45B,GCH1,GNRH1,GRK5,HK2,HMGA1,HOXB5,HOXD3,IL15,IL6,ITGA2,ITGAV,ITGB1,JUN,KCNH2,KLF5,LIF,LY6E,MATK,MEX3A,MGP,MMP1,MMP9,MSC,MUC2,MXD4,MYC,MYOD1,NFKB1,NFKBIE,NGF,NOS3,NPPA,NR4A1,NRK,OGN,OLFM…	984 (12)
NFATC4		transcription regulator		1.864	2.47e-05	ACP5,ADIPOQ,ALPL,B3GAT1,BDNF,CTSD,FABP4,FST,KCND2,PPARG,SPP1,TRPC6	934 (14)
ETV4	2.555	transcription regulator		1.859	0.000117	ACTA2,B4GALT1,CDH1,ETV4,FN1,JUP,MET,MMP9,MYB,MYC,PTGS2,SPP1,TWIST1,VIM	916 (13)
STAT5A	-0.656	transcription regulator		1.848	1.88e-09	ABCB1,ADIPOQ,AGR2,ASCL2,AXIN2,BATF3,BCL2L1,BHLHE40,CALU,CCR7,CD36,CD82,CDH1,CDK6,CDKN1A,CEBPB,CEMIP,CFLAR,CISH,CSF1R,CSF3,CX3CL1,DUSP5,EMILIN2,EMP1,EOMES,FABP4,FAS,FASLG,FGFBP1,FOS,FOSL2,GASK1B,GCHFR,GRHL3,IL12RB2,IL2RB,IL6,IL9,IRF4,KIT,KSR1,LAMB3,LHFPL2,MAF,MCL1,MMP9,MYC,MYH7,NR4A2,NR4A3,PIM1,PPARG,PPFIBP2,PPP1R15B,QPCT,RAB19,RUNX2,SCG5,SELENBP1,SETBP1,SLC34A2,SLCO2B1,SNTB1,SOCS3,SREBF1,SRP9,TAG…	1073 (16)
SP3	0.18	transcription regulator		1.835	1.86e-15	ABCB1,ACTA2,AFAP1L1,AGTR1,ANGPT2,ASNS,ATF3,CBS,CD2AP,CDK5R1,CDKN1A,CNMD,CYP17A1,CYP26A1,DLX3,DRD1,DUSP1,EGR1,F10,F3,FAS,FGF10,FLT1,FOS,GABRA4,GDF15,HAS2,HGF,HSD17B1,IGF1R,IL12RB2,IL2RB,ITGA2,ITGB8,JUN,KLF4,LHCGR,LPL,MAOB,MET,MUC2,MYH7,MYLK,NCF2,NFKB1,NOS1,NOS3,PGR,PLAU,PREX1,PRKCD,PRKG1,PTGS2,RRAS,SLC39A8,SRC,SREBF1,TAGLN,TERT,TIMP2,TLR2,TNC,TNFRSF4,VEGFA,VIM	1190 (23)
CREM	0.928	transcription regulator		1.831	1.11e-11	ACE,ACTC1,APOLD1,ARC,ATF3,ATP2A2,BHLHE40,BTG2,CD247,CEBPB,CH25H,COL8A1,CRABP2,CSRNP1,DUSP1,DUSP4,EGR1,EGR2,EGR4,ERRFI1,FASLG,FOS,FSHR,GADD45B,HMGCR,HMGCS1,HSPA4,INA,INHA,KLF5,MCL1,MIDN,MSMO1,NOS1,NR4A1,NR4A2,RARB,RHOB,SIAH2,SIK1,SMC4,SPATA20,SPTY2D1,TAC1,THBS1,TPM1,VEGFA	1108 (25)
MEF2D	0.371	transcription regulator		1.805	2.32e-07	BACH2,BDNF,BLK,CCN2,CDH1,EGR2,FN1,FOS,IKZF1,IRF4,JUN,JUND,KLF2,MCM3,MYH7,MYOD1,NPPA,NR4A1,PPARGC1A,SOD3,TGFB1,TGFB2,TGFB3,VIM	906 (20)
WWTR1	0.716	transcription regulator		1.8	9.07e-20	A4GNT,ACAN,ACTA2,ADAM8,AIFM3,AK5,AMN1,ANGPTL4,ARHGAP15,ATF3,AUTS2,CCL26,CCN1,CCN2,CD109,CD44,CDKL2,CDKN1A,CFLAR,COL9A1,COL9A3,CORIN,CPXM2,CRIM1,CSF3,CYP17A1,DIAPH2,DSTN,DUSP4,EMP1,EOMES,F13A1,F3,FGF10,FMOD,FN1,GDF15,GFPT2,GJA1,GPRC5A,GSN,HMGCR,HMGCS1,IL6,INHBA,IRF9,ITGA8,ITGB2,ITGB8,KRT14,KRT17,LATS2,MBLAC2,MX1,MYLK,NDRG1,NGFR,NOS3,NPPA,OXSM,PKP2,PMEPA1,PPP1R12B,PROSER2,RUNX2,SCIN,SH3BP1,SMAD7,SN…	1084 (22)
STAT6	0.552	transcription regulator		1.796	1.72e-11	ACP5,ACTB,ADAM11,ADAP1,ANXA1,APOLD1,AREG,ARID5A,ASS1,BCL2L1,BIK,BIRC2,CCL17,CCL26,CCR7,CD2,CD79B,CDH1,CDKN1A,CFAP74,CH25H,CHST1,CIDEC,CISH,CMPK2,CRIP1,CTSS,CYRIA,DDAH1,E2F7,EFHD2,EGR1,EGR2,EHHADH,EPHA2,FABP1,FABP4,FADS1,FLRT2,FN1,FNIP2,FSCN1,GADD45B,HMGCR,IL12B,IL15,IL31RA,IL6,IL9,IRF4,IRF9,KSR1,LACC1,LCP2,LIF,LMO7,MAF,MAOA,MAP3K5,MMP9,MOV10,MX1,MYB,NEDD9,NFATC2,NPAS2,OCSTAMP,PDGFA,PDGFC,PDK4,PHF…	1100 (19)
GATA4	-0.837	transcription regulator		1.786	3.5e-12	ABRA,ACTC1,ACTG2,ANGPT4,ANKRD1,ASCL1,ASS1,ATP2A2,BCL2L1,CCBE1,CCK,CCN2,CLDN1,CORIN,CRABP2,CYP17A1,DES,DLX3,ECM2,EDN1,EPHB1,EVPL,F10,FABP1,FAP,FGF2,FOS,FSHR,GBX2,GJA1,GJA5,GRHL3,HSPB7,IL6,INHA,INHBA,INHBB,IRF6,JUN,KIT,KRT14,KRT17,KRT7,LHCGR,MEF2C,MYC,MYH7,MYH9,MYL1,NFATC2,NPPA,OGN,PDLIM3,PTGDS,PTGS2,RARB,SIK1,SOX9,SPP1,TAGLN,TAL1,TGFBI,TGM2,TPM1,TRIB2,VCAM1,VIM	859 (24)
STAT3	0.039	transcription regulator		1.76	2.62e-24	A2M,ACTA2,ADIPOQ,ALPL,ANGPT2,ANGPTL4,APLN,AREG,ARG2,ARRDC4,ASCL2,ASIC1,ATP10A,BACH2,BAK1,BATF,BCAR3,BCL2L1,BOC,C3,CA9,CCDC88A,CCL17,CCN2,CCR7,CD44,CDH1,CDH5,CDKN1A,CDKN1C,CEBPB,CFLAR,CLIC5,CLN6,CMPK2,COL24A1,CSF3,CX3CL1,CXCL14,CYP26A1,DIO3,DMBT1,DPP4,DUSP1,DUSP5,E2F7,EDN1,EGR1,EGR2,EGR3,ENTPD1,EOMES,F3,FAS,FASLG,FBN1,FBXO40,FERMT2,FGF10,FGF2,FGG,FGL2,FLT1,FN1,FOS,FSCN1,FST,GBX2,GJA1,GRB10,GSDME,H…	1016 (15)
ID1	0.712	transcription regulator		1.735	0.00106	ABI3BP,BATF3,BCL2L1,CCN2,CDH1,CDKN1A,EGR1,EOMES,FABP4,FN1,IL9,KCTD1,LGALS3,MMP9,MYC,MYOD1,NGFR,PPARGC1A,RUNX2,STAT4,STRA6,TERT,TF,TG,THBS1,VIM	1094 (23)
SS18	-0.688	transcription regulator		1.732	0.000182	CACNA1G,CBX4,CRLF1,GADD45B,GCH1,MSX1,NGFR,PDGFB,SLC16A3,SLC34A2,SOCS3,SOX8
ACTN4	1.527	transcription regulator		1.731	4.66e-06	ANGPTL4,CDH1,DCN,FOS,MMP1,MMP9,MYC,PDLIM1,PGR,VIM,WNT5A	1019 (21)
USF2		transcription regulator		1.669	0.0121	ACP5,ACTN4,APLN,CD2,FSHR,HGF,MYC,MYH9,PRKG1,SPP1,TERT,TGFB1,THBS1,XCL1
FOXO1	0.797	transcription regulator		1.668	1.31e-21	A2M,ACAN,ACLY,ACTA2,ADIPOQ,ALDOB,ALOX5,ANGPT1,ANGPT2,ANGPTL4,APLN,AQP9,BNIP3,C1QA,CCL4,CCN2,CCN3,CCR7,CD36,CD79B,CDH5,CDKN1A,CDKN1C,CFLAR,CH25H,CIDEA,CKMT2,CLDN5,COL4A1,COL4A2,DAPK1,DCX,EDA2R,EDN1,EDNRB,EGR1,EGR2,EGR4,ELOVL5,ENPEP,EOMES,ERG,FABP4,FABP5,FAS,FASLG,FBXO21,FLNB,FMOD,FN1,FOS,FST,GABARAPL1,GADD45B,GATA2,GFPT2,GRHPR,HMGCR,HPD,IGF1R,IKZF1,IL15,IL1R1,IL6,IRF4,ITGAV,ITGB2,ITGB6,JUN,KLF2,LC…	1028 (17)
SMARCA4	-0.05	transcription regulator		1.662	1.38e-25	A2M,ABCB1,ABLIM3,ACE,ACTA2,ACTN4,ADIPOQ,AGR2,AMOTL2,APOA1,AREG,ARHGAP30,ARHGDIB,ARRDC4,ASNS,AXIN2,BAK1,BATF,BCL2L1,BIN1,BNIP3,C19orf12,CCDC169,CCDC9B,CCN2,CCR2,CD44,CDH1,CDKN1A,CEBPB,CHODL,CLCF1,CLDN1,CNP,CPS1,CRIM1,CRYBG1,CSF1,CTSS,CYP1A1,CYP26A1,CYP3A4,DES,DLX2,DUSP4,DUSP6,ECM2,EDNRA,EGR1,EGR4,ENTPD3,EVA1A,F3,FABP4,FAM167A,FAS,FBP1,FGFBP1,FGG,FHL2,FLNB,FN1,FOS,FOSL2,GADD45B,GCHFR,GJB5,GULP1,HAP…	1109 (19)
ELF4		transcription regulator		1.645	1.78e-06	ABCB1,CCR7,CDH5,CDKN1A,DLX3,DUSP1,DUSP5,EPHA3,FGFR4,IL6,IRF4,KIT,KLF2,KLF4,LCP1,PIP5K1B,RBBP8NL,RCAN1,SPP1,SRC,SYT4,THPO	1038 (19)
ZBTB10	0.36	transcription regulator		1.644	0.00496	ADAM8,AGO3,ANXA1,ARID5A,BATF3,CCR7,CD34,CX3CL1,ELMOD2,FLT1,IFI27L2,IL12B,IL15,IL6,IRF4,LPL,MX1,MYD88,NR4A3,PARP9,PTGS2,RIPK2,SAMHD1,STING1,TNFRSF8,TNFSF15,TRAF3IP2	516 (11)
TP73	-0.321	transcription regulator		1.642	6.26e-21	ABCB1,ACTA2,ADORA2B,ANGPTL4,AQP3,ARHGAP22,ATF3,ATG10,BAK1,BGN,BHLHE40,BIRC2,BTG2,C3,CADM1,CCN1,CCN5,CCR7,CD55,CD82,CDH1,CDH10,CDH22,CDK6,CDKN1A,CDKN1C,CLDN1,CNN3,CNTFR,CRYAB,CTH,CTSD,CX3CL1,DAB1,DES,DRAM1,ECM1,EDN1,EGR1,EPHA2,ESRRB,FAS,FGF2,FKBP1B,FLT1,FN1,FST,G0S2,GATA2,GJA1,GLS2,GRK5,GSN,HAPLN3,HBE1,HBEGF,HK2,HSPB8,HTATIP2,IGF1R,IGFBP4,IGSF3,IL6,INPP5D,IRF5,ITGA5,ITGA6,ITGB2,ITGB8,KIF23,KIT,KLF…	932 (15)
MYT1		transcription regulator		1.633	0.00899	ARHGDIB,DAPP1,GLT8D2,PTGR1,STEAP3,TM4SF1
PKNOX2	-0.515	transcription regulator		1.633	0.0118	BTG2,CDH1,CDKN1A,EGR1,FAS,VIM
HOXA9		transcription regulator		1.616	0.00471	CD34,CD36,CDK17,CISH,CTH,EDNRA,ERG,GATA2,HBE1,HBZ,JUN,KCNA3,KIT,LY86,MAFB,MYB,MYC,NFIA,PIM1,PRKD3,SCUBE1,SDC4,SELE,SLC27A6,SOX4,SPNS2,SPP1,VIM	494 (9)
FHL2	-2.504	transcription regulator		1.613	1.35e-05	ACTA2,AKT3,APC,BMPR1B,CD44,CDH5,CLDN5,CTSD,FASLG,FHL2,GDF6,HSPA4,IBSP,IL12B,INHA,JUN,MYC,NPPA,NPY,NR4A1,PAK1,PARD6B,PIK3CB,PIK3R3,PRKCI,SOX9,SPP1,TAGLN,TEAD1,TGFB1,TGFB2,TGFB3,WNT5A	956 (19)
PPRC1	1.848	transcription regulator		1.612	5.77e-06	AADAC,ALOX5AP,CHRNA9,CLDN1,DUSP5,EPHB1,ERRFI1,FBXL13,GDF15,HK2,LAMB3,PHLDA1,PTGS2,RND3,SMYD1,VIP	430 (7)
PLAG1	-0.292	transcription regulator		1.612	0.00186	CDC42EP4,CDKN1C,CHST1,COL9A3,CRLF1,EGR1,ETV4,MAP2,PPIC,QSOX1,SMARCD3,TGM2,TNNT3,VEGFA
DLX1		transcription regulator		1.606	1.85e-10	AREG,BCL2L1,CADM1,CD44,CDH1,CX3CL1,DLX5,FGF13,FZD8,GBX2,GJA1,HTRA1,KIT,LOXL2,MSX1,PCOLCE2,QSOX1,RGS4,SDC1,SMARCD3,SNTB1,TERT,TGFBI,TPM2,VIM,WNT5A,WNT7B
SREBF1	1.269	transcription regulator		1.593	5.12e-06	ACACB,ACLY,ADIPOQ,BCL2L1,BHLHE40,CCL17,CD36,CDKN1A,CEBPB,CFD,CIDEA,CSRP1,CTH,EHHADH,ELOVL5,ENTREP3,FABP3,FABP4,FABP5,FABP7,FADS1,FADS2,FAS,FN1,HK2,HMGCR,HMGCS1,HSD17B1,IL6,INSIG1,LGALS3,LPL,MEF2C,MIOX,MSMO1,MYL1,MYOD1,NCF2,P4HA2,PIK3R3,PLS3,PNPLA3,PPARG,PTGDS,PTGS2,RNASET2,SCD,SLC20A1,SLC7A5,SQLE,SREBF1,SV2A,TF,TGFB1,TNNI2,VEGFA	938 (21)
NFATC2	1.964	transcription regulator		1.582	2.82e-10	ACP5,BATF,BCL2L1,CCL17,CCR7,CDKN1A,CFLAR,CISH,CMPK2,CRYAB,CSF1R,CTNNAL1,CX3CL1,EDN1,EGR2,EGR3,FAS,FASLG,FGL2,HELZ2,IKZF1,IL12B,IL12RB2,IL15,IL6,IL9,INHBA,IRF4,IRF5,JUN,MAF,MYC,NFKB1,NGFR,NOX4,NR4A1,PDZD2,PLAT,PLD1,PLK2,PPARG,PPARGC1A,PTGS2,RCAN1,RGS2,SELE,SH3BP5,SLCO3A1,SOCS3,SRC,TERT,TGFB1,TLR2,USP25	1040 (15)
NFYA	0.375	transcription regulator		1.571	0.00508	ABCB1,ACACB,ACADL,ACLY,BIK,CBS,CDKN1A,CYP1A1,EGR1,GADD45B,HSD17B7,IBSP,JUN,JUND,MLH1,RGS4,RHOB,VWF	1041 (21)
TEAD1	1.339	transcription regulator		1.562	1.1e-05	ACADL,ACTA2,AK5,AMOTL2,ARID5B,ATP2A2,CALD1,CCN1,CCN2,CDK6,CDKN1A,DES,EDN1,EDNRA,FABP3,FILIP1L,IL6,LATS2,MB,MYH7,NPPA,NUAK1,PDGFRL,PPARGC1A,PPARGC1B,PTGS2,PTPRO,RUNX1T1,SDC2,SYT4,TAGLN,TGFA,THBS1,TP63,TPM1,TRNP1,VCAM1	947 (23)
JUND	2.028	transcription regulator		1.539	4.67e-07	BDNF,C1QB,C3,CDH1,CFD,F3,IL6,JUND,LHCGR,MMP1,MMP9,NCF2,NOX4,NR4A1,NTS,PENK,PLAU,RUNX2,SAT1,SDC1,SERPINB2,SOX4,SPP1,TWIST1,VEGFA	1105 (19)
SOX6	-1.366	transcription regulator		1.536	6.71e-05	ACAN,CDKN1A,HBE1,HSPG2,MAP4K4,MYC,MYH7B,MYL1,RUNX2,SOCS3,TNNI2	946 (21)
FOXF1	0.628	transcription regulator		1.536	4.05e-08	ACTG2,CD34,CDH1,CDK6,CDKN1A,ERRFI1,FGF2,FLT1,HGF,IL6,ITGA5,ITGB3,MYLK,PDGFB,THBS1,VCAM1,WNT5A
HOXB7	0.734	transcription regulator		1.528	0.00171	ANGPT1,ANGPT2,FGF2,MMP9,VEGFA	979 (19)
ARID1A	0.253	transcription regulator		1.521	1.49e-34	ACE,ACTA2,ACTN1,ALDH1A2,ALOX5,ALPL,ANXA1,APLN,ARID5B,ASCL2,ATG10,AXIN2,BGN,C3,CA9,CAV2,CBR3,CCN4,CCN5,CD109,CD44,CD55,CDH1,CDH5,CDKN1A,CDKN1C,CHST11,CLIC3,COL12A1,COL16A1,COL4A1,CSF1,CSPG4,CSRP1,CSRP2,DISP2,DLX2,DPYSL3,DUSP4,ECM1,EDN1,EEF1A2,EGR1,EPCAM,ERBB3,ESAM,EZR,F13A1,FBN1,FERMT2,FGFBP1,FLNB,FMN2,FN1,FOS,FSCN1,GABRA4,GDF15,GDF6,GDNF,GFPT2,GLIPR2,GSDME,GSN,HIBCH,HMGCR,HMGCS1,HNMT,HOXB5,HTR2B,…	1108 (19)
ERG	2.596	transcription regulator		1.518	6.92e-13	ACTN1,AGR2,ARHGAP22,ARHGAP28,ARHGEF6,ATP10A,AXIN2,BDKRB1,CADPS,CAMSAP2,CCNJL,CDH1,CHRNB2,CKS1B,CLDN1,CUX2,DBN1,DENND5A,DIAPH2,DLX5,DMBT1,DOCK2,DSTN,EPB41L3,ERG,FASTKD1,FLNB,FLT1,FMNL2,FOLH1,GABRG3,GAK,GATA2,GUCY1A1,HPCAL1,IGF1R,IL6,IL9,IQGAP3,ITGA6,KIF5C,LIPG,MAGI1,MAP3K5,MET,MMP1,MMP9,NDRG1,NEDD9,NOS3,NR4A2,NXNL2,OLFM1,PHACTR4,PIM1,PLAT,PLAU,PMEPA1,PPM1E,PRKCI,PSTPIP2,PTPN6,RAB3B,RAPGEF1,RAPGEF5…	945 (19)
NOTCH3		transcription regulator		1.514	9.53e-15	ACTA2,ACTN1,ANGPT2,BGN,CCN3,CD36,CDH1,CDKN1A,CDKN1C,CFLAR,COL14A1,COL8A1,DCN,DES,DSTN,ERRFI1,FABP7,FN1,GJA4,GPHN,HEY2,IL6,ITGA11,ITGA7,ITGA8,ITGA9,ITGB3,MAOB,MET,MMP9,MT3,MUC2,MYH7,MYH9,MYLK,OGN,PDK4,PIEZO1,PRAG1,RGS5,S100A11,S100A6,SDC2,SGCD,SLC1A2,SOCS3,SOD3,TAGLN,THBS1,TIMP3,TMSB4X,VEGFA,VIM	875 (18)
ELL2	0.008	transcription regulator		1.508	0.012	CREB3L2,CYP26A1,DNAJB9,EAF2,EDEM3,ENTPD1,FNDC3B,HOXA1,IRF4,MYC,RAPGEF3,SDC1
PPP1R13L		transcription regulator		1.504	0.00462	CDKN1A,CLDN1,GJA1,ITGAV,ITGB1,JUP,TP63	494 (10)
MEIS1	-0.833	transcription regulator		1.498	0.0192	ASCL1,CDKN1A,EYA1,FOS,MYB,RUNX2,SCUBE1,TRIB2,XCL1
CREB3		transcription regulator		1.488	0.00672	ANXA1,INSIG1,MBTPS2,MMP9,SREBF1,TMPRSS2
GATA5	-0.505	transcription regulator		1.452	0.0096	ACTC1,EDN1,MYH7,NPPA,PGR	624 (7)
POU5F1		transcription regulator		1.45	3.84e-14	ACKR3,ANGPT1,APCDD1,ASCL1,BAG3,BAK1,BCL10,BIK,BIRC2,BNIP3,CASP10,CDH1,CDKN1A,CIDEA,CRABP2,CTSD,CYP26A1,DAPK1,DLX3,DLX5,DUSP1,DUSP4,DUSP5,EFEMP1,EOMES,EPCAM,EPHA2,ESRRB,EVPL,FABP1,FAS,FASLG,FOXD3,GAA,GATA2,GBX2,GDF3,GRHL3,HAND1,HK2,HOPX,IER5,IGF1R,IL6,INHBA,IRF6,ISL1,KLF2,KLF4,KRT14,KRT17,MCL1,MEF2C,MMP9,MSX1,MYC,NR0B1,PCSK6,PDLIM3,PFKM,PMEPA1,PODXL,RCAN1,RIPK2,SLC11A1,SLC27A4,SMAD7,SOCS3,SOX17,SP…	1108 (25)
STAT5B		transcription regulator		1.439	2.01e-15	A2M,ACSL6,ACTC1,ADGRV1,ANKRD1,ANKS1B,ATP2A2,BATF3,BCL2L1,BHLHE40,CCDC141,CCR7,CD82,CDH1,CDK6,CDKN1A,CDKN1C,CDO1,CFLAR,CIDEA,CISH,CKMT2,CORIN,CSF1R,CSRP3,CUX2,CX3CL1,CYP17A1,CYP39A1,DAPK1,DIP2B,DUSP1,ESAM,FAS,FMN2,FOS,FOSL2,G0S2,GABARAPL1,GADD45B,GATA2,IL2RB,IL6,IL9,IRF4,JUN,JUND,KIF9,KSR1,LIMD2,LMAN1L,LMO2,LY6E,MAF,MB,MCL1,MMP9,MORN3,MOXD1,MYBPHL,MYC,MYH7,MYL1,NIBAN2,NOX4,NPPA,NR4A2,NR4A3,NUCB2,P…	942 (21)
FOXA2		transcription regulator		1.408	1.89e-20	A2M,ABCB1,ABCC8,ACACB,ACADSB,ACOX2,ACSL6,ACTA2,ACTC1,ACTG2,ADCY5,AGR2,ALDH1A2,ALDOB,ALOX5,ANGPTL4,APOA1,ARID5B,ASS1,BIK,BIRC2,BMP5,C3,CCL17,CCNO,CD36,CD55,CDH1,CDKN1A,COL17A1,CYB561,CYP26A1,CYP3A4,DCN,DCX,DYNLRB2,EDNRB,EFHD2,ENTPD3,EPCAM,ERBB4,ESYT3,FABP1,FABP3,FABP5,FBP1,FGF19,GAN,GFRA4,GPRC5C,HHEX,HK2,HKDC1,HMGA2,HOXA1,IL6,INHBA,ISL1,KRT17,LPL,MAFB,MAP1B,MLF1,MMP1,MMP9,MTUS1,MUC2,NFKBIE,NOTO,NP…	969 (21)
IRF1	1.096	transcription regulator		1.389	4.4e-05	ACTA2,ADAM8,AGTR2,BAK1,CDKN1A,CEBPB,CMPK2,CTSS,CX3CL1,DNASE1L3,F3,FAS,FASLG,FGL2,FN1,HELZ2,IFI35,IL12B,IL12RB2,IL15,IL6,IRF4,IRF5,IRF9,KL,MAP4K4,MMP9,MX1,MYB,MYC,NCF2,OASL,PLAAT1,PTGS2,SAMHD1,SPI1,TAPBP,TBX3,TERT,TGFB1,TMEM140,VCAM1	842 (12)
ATF2	0.01	transcription regulator		1.35	6.59e-12	ACTB,ASNS,ATF3,BCL2L1,BDNF,CCL26,COL24A1,DMBT1,DUSP1,DUSP10,DUSP5,DUSP8,EGR1,ENTPD1,FASLG,FN1,FOS,IL6,ITGB8,JUN,MCL1,MMP1,MYH7,MYLK,NPPA,NTS,PENK,PLAU,PPARG,PPARGC1A,PTGS2,RHOB,SULT4A1,TF,TGFB2,VCAM1	1084 (16)
TIAL1	0.208	transcription regulator		1.342	0.0132	HMGCR,HMGCS1,INSIG1,SREBF1,VLDLR
IRF6	1.291	transcription regulator		1.339	0.00259	GRHL3,IL12B,IL6,KLF4,NLRP3,NR4A2,PLAU,PPARG,PPARGC1A,PPARGC1B,PTGS2,RCAN1,SLC7A2,TFAP4	728 (19)
MECP2	0.151	transcription regulator		1.33	6.72e-08	ABCB1,ACTA2,ACTB,ADAM12,ANK1,ANXA1,BDNF,CCDC141,CDH1,CDH8,CHN2,DLX5,DOCK8,DPP4,EGR1,EPHA8,ETNPPL,GABRB3,GRP,IL6,INA,IVD,KCNF1,LFNG,MYC,NACC2,NAV3,NCALD,NR4A1,PLAAT1,PLP1,PLS3,PTGS2,RARB,RASSF1,RGS20,SCN4B,SEMA3D,SLC1A2,SOCS3,SYT2,SYT4,TSPAN13,UNC5D,VEGFA,VIM,WNT5A,WNT7B	946 (18)
GBX2	3.615	transcription regulator		1.325	4.79e-05	EGR2,GBX2,IL1RAP,KAT6B,KLF4,MAFB,MSX1,OTUD7B,ROBO1,RTN1,SYT2,TGFA,TNFRSF21,ULK4,VCL
JARID2	0.05	transcription regulator		1.32	3.35e-05	ACLY,CDH1,CDKN1A,FADS2,GATA2,HK2,INSIG1,KLF4,MYC,MYL1,PLIN3,PPARG,PPARGC1A,SCD,SREBF1,TGFB1	916 (18)
GLI2	0.538	transcription regulator		1.317	4.68e-10	ACTA2,BCL2L1,BNC1,CCL17,CDH1,CDKN1A,CSF3,DLX3,HK2,IL15,IL6,IRF6,ITGB1,KRT17,LAPTM5,MEF2C,MEOX1,MLH1,MMP9,MRAS,MYC,MYOD1,PFKFB3,PTHLH,RAB34,RCAN1,RUNX2,SFRP1,SOX17,SOX9,SPP1,SPRY2,STK32C,TBXT,TERT,TFAP4,TGFA,TGFB2,VIM,WNT5A	1179 (25)
FOSL1		transcription regulator		1.314	0.00223	ANKRD1,BDNF,CCN1,CD44,CSF3,EDN1,EGR1,EGR2,FOS,GAS7,HMGA1,IL6,JUN,LHCGR,MAP1B,MET,MMP1,MMP9,NTS,PLAU,RUNX2,SEMA6D,SERPINB2,SPP1,TF,THBS1	895 (19)
PBX1	0.214	transcription regulator		1.308	0.0054	ANGPT2,CDH1,CDKN1A,FABP7,FGF2,GNRH1,ISL1,MMP9,NCF2,PLAU	530 (14)
KLF7	-0.031	transcription regulator		1.301	0.0292	ACADL,CDKN1A,IL6,MX1,TG
PLAGL1	-0.353	transcription regulator		1.3	0.00439	ANGPTL4,CDKN1A,FABP1,FABP4,PPARG,PRODH,RASGRF1,SORD,TGFB1	897 (13)
DLX2	3.679	transcription regulator		1.286	0.0447	CDKN1A,DLX2,DLX5,GBX2,MYC
IRF5	-1.509	transcription regulator		1.272	0.00911	BAK1,BCL2L1,CCL21,CCL4,CDKN1A,CMPK2,COL4A1,IL12B,IL6,IRF5,MYC,NFKB1,PLOD2,PLSCR1,PTGS2,TGFB1,VEGFA	930 (17)
ZNF281		transcription regulator		1.265	0.0257	ACTA2,CCN2,COL4A1,FANCA,FN1,HOXB5,IL12B,IL6,ITGB3,PTGS2,THBS1
USF1	-0.042	transcription regulator		1.259	0.0257	ACP5,APLN,CBS,CD2,CTSS,DUSP1,FSHR,HGF,HK2,MYH9,PRKG1,PTGS2,SPP1,TERT,TGFB1,XCL1
TCF12	-0.062	transcription regulator		1.235	0.0057	ASB2,CACNG4,CCR2,CDH1,CDKN1A,CSF1R,EPCAM,ERG,FN1,GJA1,IL2RB,IRF4,JUN,KLF2,KLF6,MAF,NFKBIE,NGFR,NR4A3,PPARG,RARG,STK17B,THY1,TNFRSF8,VEGFA,VIPR2	628 (13)
HMGA1	1.738	transcription regulator		1.228	7.59e-12	ACTA2,ALPL,ARL2BP,ARL4A,CAV2,CCN1,CD44,CDH1,CEP19,COL4A1,COL4A2,CRYAB,DPYSL4,DRAM2,EGR1,FOS,FOSL2,GATA2,GSN,HAND1,HBZ,HMGCR,HS3ST1,IGFBP4,IL15,IL6,INSIG1,KIT,KLF2,LY6E,MAPK8IP1,MMP9,MT3,MYC,MYH9,MYO1F,NFIB,PHLDA2,PPARG,PTGS2,RHOB,SDC4,SLC26A2,SOD3,SOX17,SOX4,STEAP3,SYPL1,TAGLN,TFAP2C,TWIST1,VIM,ZYX	1017 (21)
PA2G4	-0.397	transcription regulator		1.217	0.0455	AGR2,GDF15,PDPN,TMPRSS2
MYOCD	-0.309	transcription regulator		1.208	6.59e-18	ACTA2,ACTC1,ACTG2,ATP1B4,ATP2A2,BCL2L1,CA10,CALD1,CCBE1,CDKN1A,CERS3,COL19A1,COL4A3,COL9A1,DES,ECM2,EIF2AK3,FAP,FBP1,FN1,FOS,GJA1,GJA5,HAND1,HCN4,HEY2,HOXB5,HOXD3,HSPB7,ITGA2,ITGA7,KCNA4,KCNJ3,LMOD1,MEF2C,MYH7,MYL1,MYLK,NAV3,NFATC2,NPPA,NR2F1,NR4A3,PCSK5,PDLIM3,RAB44,RUNX2,SIK1,TAGLN,TAGLN2,TBX18,TBX20,TBX3,TBX5,TNNC2,TPM1,TWIST1,VCAN,VEGFA	420 (9)
BACH1	1.268	transcription regulator		1.165	0.00165	AIFM3,BACH1,CD44,CEBPB,DUSP1,EDNRB,F13A1,GDF3,HK2,IGF1R,IL6,ITGA2,MMP1,PDK2,PDK4,PPARG,SCD,SLC25A22,SPP1	870 (21)
FOXC2	0.943	transcription regulator		1.158	4.04e-08	ACTA2,ADIPOQ,ALPL,ANGPT2,CDH1,CFD,EFNB2,FABP4,FN1,GDNF,ITGB3,LFNG,LPL,MET,MMP9,OSR1,PHEX,PPARG,PPARGC1A,PTGS2,RUNX2,SOX6,SOX9,SPP1,SSTR2,SYT6,TBX1,VIM,WNT5A	914 (23)
HOXA7	-0.385	transcription regulator		1.154	0.00165	CD34,CDH1,EDNRA,ERG,KCNA3,LY86,PGR,SOX4,VIM
EGR3	1.632	transcription regulator		1.154	8.91e-05	ACTN1,ATF3,BCL2L1,BDNF,BHLHE40,CBLB,CISH,FASLG,GDNF,GSN,HEG1,HTR2A,INHBB,ITGB1,ITGB3,JUN,LMO7,MAP7,MYB,MYC,NDRG1,NGFR,PIM1,PRODH,PSD,RARG,RFLNB,SOCS3,SOX9,SYTL1,TGFB3,TJP2,XKRX	863 (17)
SOX11	1.611	transcription regulator		1.142	0.00192	ADAMTS4,AS3MT,BMPR1B,CCL26,DBN1,DCX,DIPK2B,DMBT1,DPYSL3,EGR1,ERBB4,FAS,FGG,FOLH1,GNRH1,HS3ST1,IL6,ITGB1,MEX3A,MTHFS,MYO1B,MYOD1,PDGFA,RBP3,RGS2,RUNX2,SLCO5A1,TMSB15B,TUBA1A,VASH2	377 (7)
CUX1	0.099	transcription regulator		1.105	0.00609	ARHGDIB,CCN5,CDH1,CDKN1A,DKK2,DPYSL3,DUSP4,GRB10,HTRA1,ITGB2,MYC,MYH7,NPPA,PIK3IP1,PTPN14,PTPN21,SPRY4,THBS1,VIM,WNT5A	1046 (18)
MED13L	0.45	transcription regulator		1.091	0.00283	ANKRD1,LIF,MYC,ODAD2
HOXA3	1.122	transcription regulator		1.078	1.94e-05	ALOX5,ANXA2,CEBPB,DAPP1,HBE1,HEY2,IKZF1,ITGAV,ITGB1,KLF2,PRKCD,PSTPIP1,RUNX1,SOX17,SPI1,TSPAN32
TCF20	-0.134	transcription regulator		1.069	0.00241	ANK1,CCDC141,CHN2,EPHA8,ETNPPL,GRP,LFNG,MYC,NACC2,NCALD,PLS3,RGS20,SCN4B,TSPAN13,WNT7B
QKI	0.855	transcription regulator		1.062	1.68e-05	ANKRD1,CD36,CDH1,CDK6,CDKN1A,CHGB,CSF1R,CTSS,FABP7,FN1,FSCN1,GPHN,HMGCR,HMGCS1,HSD17B7,ITGB8,MAP1B,MSMO1,MYH7,NOS1,PEA15,PPARGC1A,PTPRO,TAGLN,TNC,VCAM1,VIM	920 (21)
FOXD3	2.672	transcription regulator		1.06	0.0455	CDKN1A,FOXD3,KIT,RND3
NEUROG3		transcription regulator		1.058	4.71e-06	ABCC8,CBLN1,CCK,CDH8,CDKN1A,CHGA,DRD1,EFNB2,ERBB3,HHEX,ISL1,LCN15,MNX1,NHLH1,NR2F1,NTS,RARB,RHOB,ROBO1,RORB,SCG2,SEMA3C,SREBF1,SYP,TDO2,TRNP1,TTR
ID3	0.284	transcription regulator		1.055	5.81e-10	ADIPOQ,ASCL2,BATF,BCL2L1,BLK,BTG2,CCR7,CD44,CDKN1A,CDKN1C,CEBPB,CSF1,DUSP1,DUSP10,DUSP4,EFNB2,EGR2,EGR4,EOMES,GADD45B,IGFBP4,IL2RB,IL6,INHBB,IRF4,IRF5,IRF6,ITGB3,KLF6,LMO2,MAF,MAP2K6,MMP9,MYB,MYC,NPPA,NR4A1,NR4A3,PIK3IP1,PPARG,PTPN14,PTPN5,RAPGEF4,SDC1,SELE,SMAD7,SOCS3,SOX4,STAT4,TNFRSF4,TOX2,TRAF3,TRAF5,VCAM1	992 (23)
LYL1		transcription regulator		1.034	7.82e-06	ANGPT2,BCL2L1,BTG2,CDH5,EGR1,ERG,EVPL,ITGA2,NFKB1,RAPGEF1,TAL1	258 (7)
SPZ1		transcription regulator		1.032	0.00345	CD44,CDH1,FN1,TWIST1,VEGFA,VIM,WNT5A	603 (7)
PAX3	0.007	transcription regulator		1.025	2.28e-13	ANXA1,ARC,ARHGDIB,ASNS,ASS1,BCL2L1,CDH1,CDH3,CDKN1A,CLDN5,DBN1,DLX2,EGR2,EYA2,F2RL1,F3,FABP7,FILIP1L,FOXD3,G0S2,GUCY1A1,HPX,HSPG2,IGFBP2,IL6,LAMB3,LRRC17,MEOX1,MET,MGP,MKNK1,MMP9,MNX1,MYOD1,NEDD9,NMU,OLFM1,P2RY4,PCSK2,PEA15,PGF,PITX1,PTHLH,PTPN12,PTPN14,RHOB,RLBP1,SFN,SNRK,SOX4,SREBF1,TGFB2,TIMP3,TJP2,TNC,TSPAN7,VCAN	888 (15)
NFAT5	0.463	transcription regulator		1.016	4.65e-21	ACAN,ACTN1,AKR1B1,AKT3,ALPL,ANXA1,ANXA2,AQP3,AREG,ASB2,ATP2A2,B3GAT1,BCL10,BCL2L1,BIRC2,BTK,C1QA,C1QB,C1QC,C1QTNF1,C1QTNF5,C1QTNF6,CCL21,CCN4,CCR2,CCR7,CD247,CD36,CD44,CD55,CD79B,CDKN1A,CEBPB,CFLAR,CLIC3,COL4A1,CREB3L2,CREB5,CSF1,CSF1R,CSF3,CTSS,CX3CL1,DNAJB9,EDA2R,EDAR,EDN1,EGR1,F3,FABP3,FAS,FLT1,GADD45B,GDF15,HBEGF,HECW2,HSPA2,IFI27L2,IL15,IL1R1,IL6,IRF4,ITGB2,ITGB3,KIT,LBP,LIF,LY96,MAP2K1,MAP2…	986 (21)
MSX2	-0.941	transcription regulator		1.011	1.44e-06	ALPL,AQP3,EGR2,GJA1,IBSP,MSX1,PPARG,PROX1,SPP1,TGFB2,TGFB3,TP63,TWIST1,VIM,WNT7A,WNT7B	971 (23)
MED12	0.056	transcription regulator		1.009	0.000182	ANKRD1,ASCL1,CREB5,EGR2,GDF15,GJB3,LIF,MYC,ODAD2,TMPRSS2	425 (9)
PRDM5	0.103	transcription regulator		1	4.72e-05	ALX4,CD99,CDC42EP4,CEMIP,COL19A1,EDNRA,EVL,GADD45B,INSYN1,ISLR,ISLR2,MYB,MYC,MYD88,MYOM2,PPP1R12B,RUNX1,RUNX2,SIK1,SOCS3,STK32C,TINAGL1
WDR5		transcription regulator		1	0.0436	CDH1,MYC,RUNX2,SFRP2,SPP1,TMPRSS2,VIM
HMGB1	-0.212	transcription regulator		0.999	0.0012	CCL4,CDKN1A,CHGA,CHGB,EGR1,FLT1,IL1R1,IL6,IRF5,MMP1,MMP9,MOK,MX1,PTGS2,RIPK3,SCG2,SELE,SIGIRR,SMAD7,SREBF1,SYP,TIMP3,TLR2,VCAM1	803 (16)
TFAP2A	0.115	transcription regulator		0.997	6.57e-05	ANXA1,BCL2L1,CCN5,CDH1,CDKN1A,CHRNA7,CX3CL1,DRD1,EFEMP1,EYA4,FGFR4,FREM2,GNRH1,IL12B,KLF4,KLHDC3,KRT14,LHCGR,MMP9,MYC,NOS1,NPY,PLAU,PODXL,PPARG,PPP2R2A,SESN3,TERT,TPM1,TPM3,VEGFA	1086 (23)
TFAP4	1.389	transcription regulator		0.973	1.21e-06	BCL2L1,CD44,CDH1,CDKN1A,CLDN1,CXCL14,EGR1,FN1,FOS,GDF15,IL12B,IRF6,LIF,MLF1,RCAN1,SQLE,STEAP3,TACR1,VIM	973 (12)
FEV		transcription regulator		0.962	6.28e-08	ADRA1B,ANXA2,CHGB,FOS,GCHFR,GRIA3,HTRA1,ITGB1,LPAR1,NCALD,NFIA,NLGN3,NMNAT2,NPY,NTS,PCDH9,PROX1,PYGB,RORB,SCG2,SLC1A3,SLC6A15,SOX9,STXBP6,TACR1,VCAM1,VIM
APBB1	-0.544	transcription regulator		0.956	0.00155	ACTA2,CD82,MYC,TAGLN,TPM1,VLDLR	1002 (14)
BRD7	-0.258	transcription regulator		0.944	0.000681	CDH1,CDKN1A,CYP1A1,FGF2,FN1,NDRG1,RRM2B,VCAN,VIM	1067 (19)
GTF2I	-1.041	transcription regulator		0.928	0.00172	ANGPT1,ANXA1,BTK,CACNA1E,CDKN1A,DNAAF4,EHD4,FAS,FERMT2,FOS,LAMB3,LY86,MYB,MYC,MYD88,NLRP3,PLAU,RIPK2,SLC41A3,SOX4,THBS1,TLR2	928 (16)
PRRX1	0.575	transcription regulator		0.906	0.000126	ANGPT2,FGF1,FOS,PDGFB,PPARG,SOX9,TGFB1,TNC,VEGFA,VIM	976 (12)
SNAI1	0.69	transcription regulator		0.889	9.34e-15	ACAN,ACTN1,ADIPOQ,ANKRD1,BAK1,BCL2L1,BMP5,CCN1,CCN2,CD44,CD55,CDH1,CDH5,CDKN1A,CFL2,CHRDL2,CHST2,CLDN1,DDR2,DPYSL3,ELF3,EPCAM,F3,FLNB,FMNL2,FN1,FOS,FST,GDF15,GSN,IBSP,INHA,ITGA2,ITGB1,KRT17,LASP1,LIF,MMP9,PTGS2,RUNX2,SARDH,SDC1,SLC28A3,SMAD7,SOCS3,TF,TGFB1,THY1,TMOD1,TMOD3,TP63,TPM1,TPM3,TWIST1,VIM,WASF3,WNT5B	1112 (20)
RCOR1	0.117	transcription regulator		0.883	0.0188	CDH1,CDK6,HBE1,MYC,PTGS2,SMAD7,VIM
BCL11A	-0.116	transcription regulator		0.873	0.0154	ASB2,CDH1,HBE1,ITGA6,MCL1,SOX6,VIM
EZH2	0.603	transcription regulator		0.842	2.1e-20	AADAT,ACKR3,ACTB,ALOX5AP,ALPL,AREG,ARHGDIB,ARHGEF1,ATF3,AXIN2,BCL2L1,BGN,BMPR1B,C3,CA5A,CACNA1E,CACNG4,CADPS,CCN4,CD55,CD82,CDH1,CDK6,CDKN1A,CDKN1C,CEBPB,CEMIP,CHRM3,COL4A1,CRISPLD2,CSF1,CSF3,CTNNAL1,CX3CL1,DUSP5,EGR1,EOMES,ERBB4,EZR,FADS2,FBN1,FBXL7,FGF13,FLT1,FN1,GADD45B,GBX2,GDF15,HABP4,HAPLN3,HGF,HMGA2,HOXA1,HOXB5,IBSP,IFI27L2,IGF1R,IKZF1,IL12B,IL12RB2,IL6,ITGB1,KIT,KLF2,KLF4,KRAS,LAMB3,LAMC2…	1116 (22)
CDX2		transcription regulator		0.84	0.000252	ABCB1,APC,AXIN2,CCK,CDH1,CDKN1A,CLDN1,CYP26A1,EZR,FGF1,GKN2,HMGA2,HOXB5,HOXD3,IL6,JUN,KLF4,KLF5,KRT23,LAMC2,MTUS1,MUC2,MYC,NLRP3,NTS,PARD6B,SCIN,SOX17,SOX9,STK11,TAC1,TAL1,TGFB1,VIM	1085 (23)
HOXA13	-0.417	transcription regulator		0.826	3.35e-05	ACLY,AXIN2,EMP1,EVPL,GJA1,GRHL3,IGF1R,IL6,NOG,PTGS2,SHROOM3,SLC1A2,SOX9,TBX3,TBXT,WNT5A
WT1	-1.439	transcription regulator		0.822	5.21e-12	ACTN1,AHCY,AMHR2,APC,AREG,ASNS,BAK1,BCL2L1,BTG2,BTK,CBS,CCL21,CCL26,CCN2,CD2AP,CDH1,CDKN1A,COL4A1,CSF1,CSF1R,CSPG4,CX3CL1,EGR1,EZR,FGF1,GPC5,GRB10,GSN,HBEGF,HSPG2,IGF1R,IL1RAP,IL2RB,INHA,JUND,JUP,KLF4,KRAS,LGALS3,MCL1,MGST1,MMP9,MYC,NDRG1,NR4A2,NRAP,PDGFA,PHLDA1,PODXL,PTPN9,SDC1,SH3BP5,SLC20A1,SOX9,SQLE,TERT,TGFB1,TGFB3,THBS1,TIMP3,TM4SF1,VEGFA,VLDLR,WDR90,WT1	946 (19)
VDR	0.877	transcription regulator		0.802	6.71e-14	ABCB11,ACE,ACLY,ACOX3,ACP5,ACTA2,ADIPOQ,AGR2,ANGPT2,APC,ATP2B1,BCL2L1,CD36,CD44,CDH1,CDKN1A,CEBPB,CISH,CLDN1,COL4A1,COL4A2,CSF1,CYP24A1,CYP3A4,DOK1,EDN1,EGR1,EHHADH,F3,FGG,FN1,HK2,IL12B,IL6,JUN,KCNE4,KL,LBH,LPL,MAGI1,MYC,MYD88,NEDD9,NGF,NOS3,NPPA,PHEX,PLD1,PODXL,PPARG,PPARGC1B,PTGS2,RAD51AP1,RAPGEF1,RARB,RGCC,RNF144A,RUNX2,SELE,SERPINC1,SLC34A2,SOCS3,SPP1,SRC,SREBF1,STAT4,TERT,TGFB2,TLR2,TMEM100,…	911 (17)
GATA1		transcription regulator		0.796	1.76e-09	ABCA2,ACTN1,AFF3,ALOX5,ALOX5AP,ANGPT2,ANK1,BACH2,BATF3,BCL2L1,BTG2,CD36,CDK6,CDKN1A,CNN3,EGR1,F10,FYB1,GATA2,GP9,HBE1,HHEX,IKZF1,INHA,INHBB,ITGA6,ITGB3,KIT,LMO2,MAP3K5,MCM3,MYB,MYC,NFKB1,NPPA,NR4A2,PAPPA2,PIGQ,PIM1,PLXNA2,PODXL,PRDM8,PRKG1,PSMG4,PSTPIP2,PTPN6,RUNX2,SCIN,SKI,SLC4A1,SLMAP,SOX6,SPTB,SRC,STAT4,TAL1,TBX1,TGM2,TPM1,TUBB1,UAP1,UHRF1,UNG,USP25,VWF	925 (21)
TARDBP	0.382	transcription regulator		0.786	0.00104	C1QA,C1QB,C3,CD36,CNN2,CNTFR,CSPG4,ERBB4,GALNT13,HMGCR,HMGCS1,IKZF1,IL6,INSIG1,LAMB3,LFNG,LRCH2,LRRN1,MFAP2,MX1,PLP1,PLPPR3,PRKN,SFRP1,SFRP2,SQLE,SULT4A1,TENM1,TSPOAP1,VLDLR,WNT5A	932 (13)
FOXQ1		transcription regulator		0.783	0.000113	AXIN2,CDH1,DACH1,FN1,MYC,VIM,WNT16,WNT7B	557 (7)
MEF2A	-0.033	transcription regulator		0.773	7.93e-06	ACTC1,ATP2A2,BDNF,CHRDL2,CLIC6,DPF3,EDN1,FOS,GATA2,IKZF1,IL12B,IL15,ITGA7,JUN,KLF2,MX1,NPPA,NR4A1,PPARGC1A,SMAD7,TGFB1,TGFB2,TGFB3	763 (18)
SMARCB1	-0.148	transcription regulator		0.764	1.94e-09	ABCB1,ALX4,ASCL1,BAG3,BASP1,BNIP3,CA5A,CD44,CDH1,CDKN1A,CDKN1C,COL14A1,CSF1,CYP39A1,DACH1,DAPK1,DOCK8,DSG2,F10,FABP4,FAS,FBP1,FOS,GJA1,GSN,HBEGF,HOXA1,IGFBP2,IL12B,JUN,JUND,JUP,KIF23,LBP,MCM3,MLH1,MMP1,MX1,MYC,NKX3-2,NOG,PDGFB,PPARG,PPP1R3C,PTN,RAB3B,RAD51AP1,RND3,SMC4,SOX9,STMN3,TMOD1,TUBB2A,WASF3	1046 (21)
HOXD3	-1.503	transcription regulator		0.745	1.34e-05	HOXD3,ITGA5,ITGB3,JUP,SDC1,TAGLN,TGFBI,TGM2,THBS1,TSPAN7
NCOA1	0.415	transcription regulator		0.744	0.000726	ABCB11,ADIPOQ,BTG2,C3,CA5A,CBX4,CDKN1A,CEBPB,CYP17A1,CYP1A1,DIO1,EGR1,EOMES,ERBB3,FABP4,FGF2,FOS,HAS2,IL12B,IL6,MYC,NFIB,PARD6B,PGR,PPARG,RARB,SORBS1,SREBF1,THPO	1071 (26)
TRPS1	2.499	transcription regulator		0.73	0.00412	ALPL,DPEP2,FN1,IBSP,KCNMA1,PACSIN1,PHEX,PHOSPHO1,RANBP3L,RUNX1,RUNX2,TGFB2	494 (7)
SOX7	1.047	transcription regulator		0.728	0.000125	ASCL1,COL4A1,COL4A2,CRABP2,DLX3,EVPL,FLT1,GBX2,GRHL3,HSPG2,IRF6,KRT14,KRT17,KRT7,PLAU,SOX4,TGFBI,VCAN
TFE3		transcription regulator		0.724	1.48e-05	CDH1,CIDEA,CTSD,EGR2,ESRRB,GDNF,HK2,HMGA2,INSIG1,KLF2,LGALS3,MYH9,NGFR,PHOSPHO1,PPARG,PPARGC1A,PPARGC1B,RUNX2,SLC1A1,SMAD7,VEGFA,VIM,WT1	912 (16)
WBP2	1	transcription regulator		0.724	9.13e-05	ADAMTS14,ALPK1,ALPK2,AQP3,AXIN2,COL4A1,CSF3,CSPG4,CTH,CYP24A1,EGR1,GGT5,HAS2,HNMT,ITGB3,JUN,LIPG,MTMR1,OSCP1,PI16,POLG,PTGS2,RASGRP3,SLAMF8,SLC16A3,SLC1A3,SOX4,SYNM,TAGLN	817 (7)
GATA6	0.755	transcription regulator		0.721	3.89e-07	ABCB1,ACTA2,ACTC1,AMHR2,ASCL1,BMP5,CALD1,CDKN1A,COL4A1,COL4A2,CRABP2,CYP17A1,DLX3,DPP4,EDN1,ESRRB,EVPL,FGF2,FOXD3,GBX2,GRHL3,IRF6,KLF2,KRT14,KRT17,KRT7,LHCGR,MARCO,MEF2C,MYC,MYH7,MYH9,MYLK,NFIA,NOS3,NPPA,PGM2,PPARG,RARB,SEMA3C,SOX17,STK11,TAGLN,TBX3,TGFB1,TGFB2,VSIG4,WNT7B	1210 (28)
PIAS1	0.299	transcription regulator		0.714	2.6e-05	ABCB11,ACTA2,APBA2,BDNF,CDH8,CDKN1A,CHRM3,CYP17A1,GUCY1A1,KLF2,KLF5,LRP8,MCL1,MYC,NOS3,NPPA,PAK1,SREBF1,SV2B,SYP,TAGLN	1091 (20)
DTX1	0.033	transcription regulator		0.711	0.000182	CD82,DUSP6,EGR1,GFRA1,LY6E,MCL1,SPP1,SPRY4,TGFB2,VEGFA	993 (20)
PSMC3IP	-0.403	transcription regulator		0.692	0.000451	C3,CEBPB,CYP17A1,FABP4,PPARG
ARNT2	0.175	transcription regulator		0.686	0.00311	AKR1B1,ANGPT2,ANGPTL4,AOX1,CDH3,CFL2,CMKLR1,COL12A1,CPXM2,EGR1,EYA1,GATA2,GDNF,HOMER1,IGFBP4,ITGB3,LAMB3,LCP1,MSC,MYH7,NFATC2,NGEF,PDLIM4,PEA15,PKIB,PLP1,SEMA5B,SLC12A3,SNX5,ST8SIA5,TNFRSF9,USP2,VEGFA,WNT7B
MYRF		transcription regulator		0.655	2.54e-06	AMOTL2,AQP9,CCN2,CHMP4C,COL14A1,GDF15,GRB14,HPGDS,LHPP,NGEF,NOTUM,OTUD1,PDK4,PLP1,PTPRE,SEPTIN11,SOWAHC,TNFRSF21,TRAF5,TRIM2,UAP1L1
DDB2	0.583	transcription regulator		0.648	0.0132	CDKN1A,CFLAR,MMP9,TERT,VEGFA
TWIST2	-2.36	transcription regulator		0.64	3.99e-08	BIN1,CD44,CDH1,CDKN1A,CHRDL1,DUSP5,DUSP6,FBLN5,FN1,KLF6,MAF,MMP9,OSGIN1,PPARGC1A,PRKAA2,STK11,TERT,TGFB1,TWIST1,VIM	647 (14)
NOTCH4		transcription regulator		0.62	0.000182	ACTA2,ANGPT1,CDKN1C,DES,EFNB2,HEY2,IL12B,IL6,MET,PRAG1,RGS5,TAGLN	720 (20)
SQSTM1	0.27	transcription regulator		0.616	0.044	AOX1,ARID5A,EDN1,FGL2,HBEGF,IL12B,IL15,IL6,JUN,MMP9,PLAT,PLK2,RGCC
PML	-0.199	transcription regulator		0.609	0.000162	ACACB,ACADL,ADIPOQ,APOA1,CDKN1A,DNAJA4,DNAJB4,DNAJB6,DNAJB9,DRC1,FABP1,FAS,HBE1,HBZ,HMGCR,HMGCS1,HSD17B7,IBSP,IFI35,JUP,LPL,MAF,MAFF,MAP2K1,MX1,NDRG1,PDK4,PIK3C2A,PIK3CB,PLSCR1,PPARGC1A,SREBF1,VIM	1293 (27)
HEY2	3.778	transcription regulator		0.603	3.81e-05	ACTA2,ALPL,ANKRD1,CX3CL1,GJA5,HEY2,IL6,MYH7,NPPA,PROX1,SLN,TAGLN,TBX5,XCL1	638 (12)
GLIS3	4.741	transcription regulator		0.602	0.00347	ADM2,CCL17,CDH5,COL12A1,COL13A1,COL14A1,COL16A1,COL4A1,COL4A2,DIO1,FAM20C,GLIS3,HHEX,IL6,IQGAP3,ISL1,ITGA2,KIF23,MAFB,SOD3,TG
PIAS2	0.045	transcription regulator		0.594	0.00451	CDKN1A,CDKN1C,FOS,ITGA2,SLC11A1	1159 (23)
SOX9	2.595	transcription regulator		0.592	3.8e-13	ACAN,ADAMTS10,ADAMTS14,CCN2,CD44,CDH1,CDKN1A,CELSR2,CNMD,CREB3L2,DLX3,DMBT1,DUSP6,ECM1,FGF1,FGFBP1,FN1,FOS,FOXD3,GAS7,IL6,INHBB,ITGB8,KIT,KLF4,LBP,LRP6,MUC2,MYC,MYLK,NKX3-2,PDGFA,PHEX,PPARG,PTGDS,RASGRP3,RUNX2,SOX4,SOX8,SOX9,TBX1,TGFB1,THBS2,TIMP2,TWIST2,VEGFA,VIM	1015 (25)
ZNF423	-1.892	transcription regulator		0.591	0.00171	ADCY3,CD79B,CIDEA,PPARG,RARB	432 (7)
NANOG		transcription regulator		0.584	7.13e-05	ABCB1,BMPR1B,CDK6,CDKN1A,DCN,DLX5,EGR1,EOMES,ESRRB,FOS,FOXD3,FST,GBX2,GDF6,HOPX,HOXA1,IGF1R,IRF6,ISL1,KLF4,MAP1B,MYC,NPTX1,RAPGEF5,RCAN1,S100A6,SMAD7,SMURF2,SOX17,TBX3,TBXT,TFAP4,TGFB2,TGFB3,THBS2	956 (20)
CEBPA	0.978	transcription regulator		0.584	2.28e-14	A2M,ABCB1,ACLY,ACTA2,ADIPOQ,AKR1B1,ALOX5AP,ANXA1,APCDD1,APLN,APLNR,ARG2,ASCL1,ASNS,ASS1,BIK,BIN1,BTG2,C3,CCL4,CDH1,CDH5,CDKN1A,CEBPB,CELA2A,CFD,CPS1,CRABP2,CSF1,CSF1R,CSF3,CYP3A4,CYP3A5,DLX3,EEF1A2,EFNB2,EGR2,ERG,EVPL,EXTL2,FABP4,FADS2,FLT1,FOS,G0S2,GATA2,GBX2,GCH1,GJA1,GP9,GRHL3,HAS2,HGF,HMGA1,HMGCR,IGFBP4,IL12B,IL6,IRF6,JUN,KLF2,KLF4,KLF5,KRT14,KRT17,KRT7,LHCGR,LPL,MYC,MYOD1,NFATC2,NR4A2,OXTR,P…	968 (19)
TP63	-1.46	transcription regulator		0.584	2.06e-43	ABCB1,ACTA2,ACTN1,ADA2,ADAMTS18,ADAMTS2,ADAMTS4,AGR2,APC,AREG,ARID5B,ATG10,BCL2L1,BHLHE40,BMP3,CA4,CAPN2,CAPN6,CCN1,CCN2,CD82,CDH1,CDH3,CDK17,CDK18,CDK6,CDKN1A,CDKN1C,CFLAR,COL12A1,COL14A1,COL17A1,COL19A1,COL4A1,COL4A2,COL4A3,COL8A1,COL8A2,COL9A1,COL9A3,CRIM1,CRTAP,CRYAB,CTSD,CYGB,DCN,DDAH1,DIRAS2,DOK1,DPP6,DUSP10,DUSP6,ECM1,EDN1,EDN2,EDNRB,EGR1,EGR2,EMP1,EPHA2,EPHA3,ERBB3,F3,FANCA,FAS,FAT2,FBLN5…	940 (16)
PAX6		transcription regulator		0.578	0.0203	ACP5,ASCL1,CAP1,CDH8,CDK6,CHKA,CRISPLD2,CRYAB,CRYZ,CUX2,DOK1,EFNB2,EHBP1L1,EOMES,FABP7,FGF19,GAA,HAS2,IQGAP3,ISL1,MAF,MCM3,MET,MMP9,MTCH1,PCSK2,SCG5,SEMA3C,TNC,TTC24,VEGFA
MYF6		transcription regulator		0.57	1.07e-08	ACACB,ANGPTL4,APLN,BDNF,BRINP3,CCL17,CCL26,CDKN1A,CX3CL1,DCN,DPP4,FGF2,FST,GDNF,GSN,HBEGF,IL15,IL16,IL6,INHBA,LIF,MYOD1,PDGFA,PDGFB,SERPINF1,SPP1,TGFB1,THBS1,TNFRSF10B,TNFRSF11B,TNFRSF8,VEGFA	378 (7)
SIM1		transcription regulator		0.522	0.0106	AKR1B1,ANGPT2,ANGPTL4,AOX1,CDH3,CFL2,CMKLR1,COL12A1,CPXM2,EGR1,EYA1,GATA2,GDNF,HOMER1,IGFBP4,ITGB3,LAMB3,LCP1,MSC,MYH7,NFATC2,NGEF,PDLIM4,PEA15,PKIB,PLP1,SEMA5B,SLC12A3,SNX5,ST8SIA5,TNFRSF9,USP2,WNT7B
HES1	-1.05	transcription regulator		0.511	0.000385	ACTA2,ASCL1,CCK,CCN2,CDKN1A,CDKN1C,CFD,CHGA,DUSP1,FN1,GAA,IL6,ISL1,PPARG,PTGDS,RLBP1,SPP1,TAGLN	977 (21)
PAX7	-0.863	transcription regulator		0.507	0.000942	ASS1,CNTFR,CRLF1,DEPTOR,EYA4,F2RL1,GALNT13,GCH1,KCNK2,LRFN5,OLFM1,PDLIM4,PPARG,PTGR1,RNF128,RNH1,TRIM54
IRF2	0.763	transcription regulator		0.498	0.00118	C1QTNF1,C1S,CDKN1A,CIDEC,CTSS,DNAJB6,DUSP5,FASLG,FGG,HK2,IFI35,IL12B,IL12RB2,IL6,KLF4,LBP,MYH9,PFKFB3,PTGR1,PTGS2,SDC1,SLC7A1,SLCO2B1,TAPBP,TPM1,VCAM1	941 (20)
EBF1	0.235	transcription regulator		0.495	1.81e-05	ACACB,ADCY3,ADIPOQ,AKT3,CBLB,CCR2,CD79B,CDH8,CEBPB,CNGA2,CSF1R,DLX5,FBP2,HK2,IL12B,IL6,INPP5D,KRAS,MAP2K1,MKNK1,MYC,MYD88,PHKA2,PIK3R3,PPARG,PPARGC1A,PPP1R3C,PRKAA2,PRKAG3,PRKAR2B,PYGB,SFRP2,SHC4,SOCS3,SREBF1,TLR2	914 (20)
BARX2	1.859	transcription regulator		0.483	0.000357	ACTA2,CDH1,HK2,HTRA1,MATN2,MMP1,MMP9,MYLK,SCG2,TIMP3	382 (7)
MYOD1	1.449	transcription regulator		0.472	1.09e-09	ABRA,ACACB,ACTA2,ACTC1,ANKRD1,ASB2,ASS1,BCL2L1,BIN1,BNC1,CADPS2,CDKN1A,CDKN1C,CDO1,COL4A1,CRYAB,CXCL14,DAO,DES,DUSP1,EPHA8,ETV4,GREM2,HAS2,HSPB8,IRX1,ITGA7,KLF6,LDB3,LIF,MAFB,MAP2K1,MEF2C,MMP1,MSC,MUSK,MYH7,MYL1,MYOD1,NPTX1,PDGFA,PDLIM3,PFKM,PMEPA1,PPARGC1A,PRIMA1,PRKAR2B,RBM38,RRAS,RUNX1,SBK1,SDC2,SGCA,SMAD7,SRC,TGFB1,TNNC2,TNNI2,TNNT3	960 (24)
ELK3	1.526	transcription regulator		0.466	0.00179	CDH1,CDH5,CLDN5,EGR1,FOS,VCL,VEGFA	731 (16)
ESRRB	-2.334	transcription regulator		0.448	0.0199	CDKN1A,GUCA1B,HK2,IL12B,MCL1,MEF2C,MYC,NR0B1,PCSK6,SMAD7
TLX1		transcription regulator		0.447	0.00524	CCK,GABRB2,GATA2,MCL1,MYB,SPI1,TAC1,TAL1	456 (7)
POU2F2		transcription regulator		0.442	3.12e-06	ALOX5,ARG2,CD79B,CFLAR,COCH,DIXDC1,GGA2,IL6,JUN,LY6E,MOCOS,MYC,PFKFB3,PTPN6,SCD,SPI1,SPP1,SSTR2,SYDE2,TERT,TGFA,TIMP2,TNFAIP2,TNFRSF21,VIP,ZDHHC23	354 (9)
POU4F2		transcription regulator		0.434	0.0116	ADAMTS15,ANGPTL4,CACNA2D2,CAMK1G,DLX2,GPR20,HSPH1,LOX,MMP9,MYLK2,NHLH1,NPPA,NR4A2,PROX1,TNNI2,WT1
CEBPE		transcription regulator		0.424	0.0494	ALOX5AP,BCL2L1,CDK6,CEBPB,CSF1R,IL6,MCM3,MMP9,MYC,PTGS2,SERPINB2
HOXC6		transcription regulator		0.424	3.61e-07	ABCB1,BCO2,COL23A1,CYRIA,DCN,ERRFI1,MEGF10,MME,PAK1,PDE4DIP,PLXDC1,RFLNA,RUNX1,SLC1A3,TNFAIP8,VCAM1,ZNF536
TOX	0.825	transcription regulator		0.422	0.0348	CCR7,CD2,CDKN1C,EGR3,ENTPD1,EOMES,KLF2,RFC2,STK11,TNFRSF8,TNFRSF9,ZBTB7B
ID4	-0.392	transcription regulator		0.422	0.0132	CDH1,CDKN1A,PPARG,VEGFA,VIM
MTA1	-0.041	transcription regulator		0.409	8.51e-07	ACKR3,ACTC1,AXIN2,BCAS3,BCL2L1,CCN4,CCN5,CDH1,CDKN1C,EMP1,EPHA2,HBE1,MMP9,MYC,PGR,RRM2B,SOX4,TWIST1	1096 (19)
NFIC	-0.274	transcription regulator		0.408	3.09e-05	ADAM12,ALX1,CD44,CDKN1A,CELA2A,CSF1,CYP17A1,ENPP3,FABP7,G0S2,GRB10,HTRA1,ITGB2,JUND,LHCGR,NFIA,NOTUM,PDGFA,PLEK2,PLSCR1,RNF130,SAT1,SLC7A2,STXBP6,TGFB1,TMEM140,TREM2,TWIST2,WNK4,WNT5A	792 (12)
SKIL	1.068	transcription regulator		0.396	0.000717	ACTA2,ADAM12,CDH1,CDKN1A,COL4A1,CPEB2,DIXDC1,PLSCR1,SMAD7,SOX17,THBS2,TPM1,TPM3	974 (20)
POU2AF1		transcription regulator		0.391	0.000949	B4GALT1,BCL2L1,CD44,CD79B,DAPK1,FASLG,FGL2,IL6,IRF4,LFNG,MCL1,MEF2B,MX1,MYC,PAPPA2,RC3H1,RRM2B,S100A10,SOX4,SPI1,SPP1,STAT4,TGFB1,TRAF3,UNG	1006 (20)
MAML1	0.827	transcription regulator		0.391	0.0292	CDH1,EGR1,HEY2,MYLK,RND3
PHF6	0.682	transcription regulator		0.389	0.00518	ANGPTL4,AS3MT,BTG2,JUN,JUND,LOX,MYL10,NDNF,NFKB1,SOX4,VEGFA	424 (7)
EHF	-0.317	transcription regulator		0.377	2.61e-06	ACTA2,ALOX5,ANGPTL4,CCBE1,CDH3,CRABP2,CYP1A1,FOLH1,GATA2,GRHL3,HK2,HOPX,IL6,KIT,KLF5,MET,MMP1,PLAT,RARB,S100A12,SAA1,TFPI,TGFB1,THY1,TNC,TNFRSF10B,VEGFA	640 (7)
CERS2	1.143	transcription regulator		0.359	0.0292	ABCB1,CDKN1A,CERS6,IL12B,IL6
ZIC2	-0.181	transcription regulator		0.335	2.25e-08	ACSS3,AKT3,ALPK2,APBA2,ATP10A,AXIN2,BEGAIN,CRABP2,CRLF1,CSF1,CXCL14,DIRAS1,DRD1,FMN2,KIF1A,KRT7,LAMC3,LRP2,MAPK4,MKX,MMP9,PGR,PHACTR1,PHYHIPL,PI15,PKP2,RNF128,SFRP2,SOX21,SRC,TFCP2L1,WNT7A
ESRRA		transcription regulator		0.332	5.32e-16	ABCC9,ABRA,ACADL,ACKR3,ACTC1,ADAM8,ALDOB,ANGPT1,ANGPT4,ANGPTL4,ANXA1,APLN,APLNR,APOLD1,ATP1A1,ATP2A2,B4GALT6,BSND,CCL17,CCR2,CCR7,CD36,CDH5,CH25H,CHKA,CKMT2,COL4A1,COL4A2,COL4A4,COL8A1,CRHR2,CSF3,CSRP2,CSRP3,CX3CL1,CYP17A1,EFNB2,EGR3,EIF2AK3,ENPEP,EPHA2,EPHB1,FABP1,FABP3,FABP4,FASLG,FBP1,FGF1,GALM,GSDMA,HGF,HK2,HMGCR,HMGCS1,HTATIP2,IBSP,IGFBP4,IL6,KCNJ8,KRT13,KRT222,KRT23,KRT40,LPL,MAOB,MMP9,MSX1…	1037 (22)
CBFB	0.855	transcription regulator		0.329	1.01e-05	ACAN,AGPAT4,CDH1,COCH,CSF1R,FABP4,FASLG,HTRA1,IL2RB,ITGB6,KCNK5,MMP9,PIM1,PPARG,RAB3IP,RUNX1,RUNX2,SLC25A19,SMURF2,SPP1,STAT4,TLR7,TNFRSF4,TWIST1	1018 (22)
PRDM16	-0.428	transcription regulator		0.326	2.58e-06	ADAM12,ANKS1B,ANXA5,BLK,CCN1,CCN2,CCN3,CCR2,CDKN1A,CIDEA,DCN,EPHB1,GALNTL6,HGF,LOX,MAF,MYH7,MYOD1,NPPA,PPARGC1A,PPP2R2B,PPRC1,TENM4	855 (17)
KCNIP3	-0.763	transcription regulator		0.316	0.000151	ABR,ACP5,ACTA2,ADORA2B,CALCA,CCR2,CCR7,CX3CL1,FOS,FOSL2,GIT1,IL16,IL6,ITGA2,KCND2,SLAMF8,SOCS3,TGM2,TNFAIP6	955 (20)
SKI	1.586	transcription regulator		0.314	0.0288	ACTA2,CDH1,CDKN1A,CYP26A1,FAP,SMAD7
HOXC8	-0.802	transcription regulator		0.308	0.00669	ANKRD1,ASS1,GREM2,RARB,SERPINF1,SLC16A3,SPP1,SRD5A2,TAGLN
HOXA10		transcription regulator		0.295	3.51e-05	ACTB,ADIPOQ,ALDH1A2,ALOX5AP,ALPL,ARL4A,BCHE,CDKN1A,CDKN1C,CFD,CLDN5,DPP4,EGR2,ERG,FLT1,FN1,FST,GJA1,HBE1,HMGCR,IL1R1,ITGB3,MAP1B,MSN,MYLK,NCF2,NR4A1,PDPN,PRKCD,REM1,RHOG,S100A12,SAT1,SLC27A1,SLC27A6,STK17B,TDO2
MGA	0.508	transcription regulator		0.277	0.00814	ACE,BNIP3,BTG2,MAP3K15,MGST1,NDRG1,P4HA2,PPP1R1B,RNF130,TF,TGM2,TRIB2,TWIST1
STAT1	-0.384	transcription regulator		0.275	3.91e-10	A2M,ACE,ALPK1,ANGPT2,APOA1,BCL2L1,C1S,C3,CCN2,CCR2,CCR7,CD44,CDH5,CDKN1A,CH25H,CLIC5,CMPK2,CTSS,CX3CL1,DPP4,EDN1,EGR1,FAS,FASLG,FGF2,FGL2,FN1,FOS,HAPLN3,HBEGF,HTRA1,IFI35,IGF1R,IL12B,IL12RB2,IL15,IL1R1,IL31RA,IL6,IRF5,IRF9,ISL1,ITGA2,ITGA5,JUN,KLF4,KRT17,LIF,LPL,LY6E,LY96,MMP9,MX1,MYC,MYD88,MYH7,NFKB1,NOX1,NOX4,NPPA,PARP9,PDGFA,PDGFB,PDGFC,PHACTR1,PIM1,PLSCR1,PPARG,PPARGC1B,PTGS2,PTN,RARB,RUNX1,S…	981 (15)
MAF	-2.582	transcription regulator		0.273	0.00649	CRYAB,CRYBA1,CRYBB1,DEPTOR,FABP7,HMGCR,IL12B,IL1R1,MAF,NUAK1,PCSK2,SCG5,SQLE,TGFB1,VCAM1	724 (7)
DLX5	1.27	transcription regulator		0.264	0.00524	CYP26A1,DLX5,FOXL2,GBX2,HAND1,HGF,RGS5,RUNX2
SMAD6	0.462	transcription regulator		0.26	0.00672	ACAN,IL6,SOX9,SPP1,TGFB1,TGFB3	1002 (18)
MZF1		transcription regulator		0.246	0.00236	CD34,FGF2,MYB,NOS1,SOD3,TGFB1
TADA3	-0.443	transcription regulator		0.225	0.00283	CDKN1A,CTSD,PGR,RARB	671 (14)
MTDH	0.521	transcription regulator		0.22	6.37e-14	ACTA2,ACTB,ACTC1,ACTN1,ALDOB,ANGPT1,ANGPTL4,ANXA2,CCN2,CCN4,CD36,CDH1,CDKN1A,CDKN1C,CIDEC,COL4A1,COL4A2,CSRP1,CYP1A1,CYP26A1,DIO1,EFNB2,EGR1,FABP1,FADS2,FGF1,FGG,GSN,HK2,HOXA1,HPD,HTRA1,IGFBP2,ITGB6,LGALS3,LHPP,MMP9,MSMO1,MSN,NOX4,PGF,PHLDA1,PLIN5,PLS3,PPARG,PTGDS,RARB,SLC1A2,SPP1,THBS1,TIAM2,TWIST1,VIM	1031 (20)
NCOA6	0.015	transcription regulator		0.218	0.00899	AREG,FABP4,FOS,LPL,SREBF1,TGFA	1246 (26)
HOXA5	0.023	transcription regulator		0.208	2.27e-07	CD44,CDH1,CDKN1A,CLDN1,EGR1,FGF10,GADD45B,GDNF,IL6,LIF,PGR,PTGS2,PTN,RUNX2,SAT1,SPRY2,TGFB1,TGFB3,VIM	864 (15)
TGFB1I1		transcription regulator		0.206	0.000489	CD36,CDKN1A,CIDEC,FABP1,FN1,FOS,KLF4,NOX4,SMAD7	984 (23)
NFIB	-1.471	transcription regulator		0.202	1.94e-05	ADRA1B,CACNA2D2,CDH1,CDK18,CREB5,EDN2,EYA1,GFRA1,GRIK1,HGF,HSD17B7,LOX,LZTS1,PLEKHF1,STEAP4,VIM
CLOCK	0.133	transcription regulator		0.2	2.8e-06	AKT3,ANGPTL4,ARHGEF28,BHLHE40,BPHL,CALD1,CCN2,CEMIP,CHST3,CYP26A1,DNAJB9,DUSP8,FABP7,FAM107A,FGF1,GADD45B,GDNF,GJA1,HAS2,HSPH1,IKBKE,KCND3,KCTD1,LYPD6,MAPK4,MEGF10,MGP,MOXD1,MSMO1,MYLK,NPAS2,PCGF5,PRELID3B,PTPN14,RAP2A,RGS5,RSPH3,S100A11,SCD,SCN4B,SLC12A3,SLC1A2,SLC20A1,ST3GAL5,THBS1,TNFRSF21,USP2,WEE1,WNK4,WT1,ZDHHC20	452 (7)
TCF3	1.14	transcription regulator		0.197	9.51e-06	ABCC8,ACACB,ADIPOQ,AREG,ASB2,ATF3,AXIN2,BACH2,BIK,CCR2,CD2,CD55,CD79B,CDH1,CDH5,CDK6,CDKN1A,CDKN1C,CREB3L2,CSF1R,DSTN,EAF2,ENTPD1,EPCAM,ESRRB,GADD45B,GATA2,HAND1,HS3ST1,IL16,IL2RB,IL6,IL9,IRF4,IRX1,JUN,JUND,KIT,KLF2,KLF4,KLF6,LEPROTL1,LHCGR,LMO2,MAF,MAL,MEF2B,MEF2C,MSMO1,MYC,MYOD1,NELL1,NFKBIE,NPPA,NR0B1,NR4A3,NRAP,PPARG,RARG,SCIN,SCX,SEMA3F,SLC7A5,SOCS3,STK17B,TF,TFCP2L1,THY1,TNFRSF8,TOX2,TRAF5,…	989 (24)
HDAC6		transcription regulator		0.193	0.000115	CDH1,GAA,GDF6,IL6,JUN,MYC,MYD88,NOG,PDGFB,PLAU,SLC1A2,TAGLN,TGFB1,TGFBI,VCAM1,VIM	850 (20)
TBX3	1.492	transcription regulator		0.193	7.68e-12	ABCC8,ADA2,ADAM33,ADAMTS14,ADAMTS2,AGTR1,AK5,ANGPT1,ARL8A,ASS1,CD36,CDH1,DCN,DUSP10,E2F7,EDN1,EDNRA,EGR1,GJA1,GJA5,GJC2,GPAT2,GREM2,GRIA3,HACD4,HCN1,HCN4,IL2RG,INPP5F,ITGB3,KCND2,KCNJ3,KCNJ8,KIF23,LBH,LPAR1,MCM3,MMP9,MYC,MYLK,NMRK2,NPPA,P4HA3,PDE7B,PROX1,RAD51AP1,RASGRP3,ROBO1,RUNX2,SERPINF1,SGO2,SMPX,SYNJ2,TBX18,TGFB2,TNC,TWIST1,VIM,WNT5A	582 (7)
ARRB1	-0.142	transcription regulator		0.186	0.00778	EGR1,ENAH,F3,FABP4,IL6,LPL,MYC,PTGS2,SPP1,VCAM1	767 (18)
FOSL2	4.45	transcription regulator		0.181	0.000398	BDNF,CCR2,CEBPB,COL4A1,CSF3,F3,FAS,FN1,IL6,LUM,MMP1,MYOD1,RUNX2,S100A11,SERPINB2,SOX4,SPP1	1104 (18)
HDAC9	0.2	transcription regulator		0.174	0.0226	JUN,KLF2,MYH7,NPPA,NR4A1,RGS2,TGFB1
RUNX2	2.883	transcription regulator		0.169	8.58e-11	ACTA2,ALPL,AXIN2,BCL2L1,CCR2,CDH1,CDKN1A,COL24A1,DES,DPYSL3,EDN1,FLRT2,FN1,GADD45B,GAMT,HTRA1,IBSP,IGF1R,ISL1,ITGAV,LGALS3,LUM,MCL1,MMP9,MYOD1,NUDT12,PIK3CB,PLAU,PTGDS,RGCC,RUNX1,RUNX2,SOX6,SOX9,SPP1,ST3GAL5,TAGLN,TG,TGFB1,TNFRSF11B,TPM1,VEGFA	914 (18)
ISL1	1.328	transcription regulator		0.159	0.000163	A2M,ABCC8,ACTC1,BNC1,CLIC6,DAB1,ETV4,EYA1,FGF13,GBX2,HOXB5,IL6,IRX1,IRX2,ISL1,MSX1,MYL1,NPY,PAPPA2,PCSK2,RBM24,RUNX1,SOX9,TBX3
SPIB		transcription regulator		0.156	0.0462	ATF3,BTK,CCR2,COL17A1,EGR1,EGR2,EPCAM,IRF4,KIT,KLF6,MEF2C,NFKB1,P2RY12,P2RY6,TENM4,TNFRSF11B
ATOH8	-0.241	transcription regulator		0.152	0.0265	CCN2,DCN,MAOB,TIMP3
SRA1	-0.403	transcription regulator		0.146	0.000102	ADIPOQ,FABP4,MMP1,MMP9,PPARG,SLC2A12,TGFB2,THBS1,TMPRSS2	1205 (24)
DDIT3		transcription regulator		0.144	7.12e-06	ANKRD1,ASNS,ATF3,BAK1,CFLAR,DDR2,ERO1A,FAP,FN1,IL12B,IL6,ITGA2,LOX,MCL1,MLF1,NDRG1,NPAS2,PDPN,PLAT,PPARG,PPARGC1A,RGS4,SELE,SH3RF3,TENM4,TGFB2,TGM2,THBS2,TNFRSF10B,UNG,VIM	975 (15)
ZBTB20	-0.639	transcription regulator		0.143	0.0039	ANXA1,CISH,CKMT2,CLIC6,DCN,EMILIN2,HSPB8,IGFBP2,IL6,KCNK5,KRT23,NEDD9,PDK4,PPARGC1A,SOCS3,TECTA	622 (14)
HBP1	0.185	transcription regulator		0.138	0.0292	CDKN1A,MYOD1,PDK4,PIM1,PTGS2
MYOG		transcription regulator		0.128	0.0375	ACACB,CDKN1A,FOS,MEF2C,MYOD1,PDGFA,PRIMA1
VAV2	0.381	transcription regulator		0.128	0.0101	AREG,CDH1,FOS,HBEGF,HGF,IL6,TGFA,VIM
KLF16		transcription regulator		0.111	6.77e-05	CDH1,CDKN1A,CYP1A1,DRD1,TWIST1,VIM	742 (10)
TRIM28	-0.393	transcription regulator		0.078	7.2e-09	APOA1,AREG,ARID5A,BMP5,CAB39L,CCL4,CCN4,CYP26A1,EFEMP1,EGR1,ERBB4,ESRRB,FOS,FOXL2,FST,GDF15,HBE1,HSD17B7,IL1R1,IL6,INHBA,INHBB,KLF2,LIF,LMO7,MAP3K5,NFKB1,PLAU,PTGDS,RAMP3,RCAN1,SOX11,SOX4,SOX6,SOX8,SOX9,STING1,VIM,WNT5A,WNT7A,WNT7B,XKR4,ZSWIM5	963 (17)
TFEB	0.113	transcription regulator		0.076	2.42e-07	ABCA2,ACP5,ACTA2,AGA,ALOX5,AQP9,AREG,ATP2B1,CCL17,CCN2,CD48,CD55,CDCP1,CDH1,CH25H,CHST2,CLN5,COL16A1,CTSD,CTSO,CTSS,DCN,ECM1,EGR2,EMP1,EOMES,FN1,FOS,GAA,GDNF,GGA2,HMGA2,HMGCR,HOPX,IL6,ITGA11,ITGA5,JUN,KIF23,LAPTM4B,LAPTM5,LGALS3,LIF,MCM3,MET,MLH1,MYC,MYH7,NAGA,NFIA,NGFR,NPPA,PDPN,PHLDA1,PLA2G7,PLAU,PPARG,PPARGC1A,RUNX2,SCARB2,SLC1A3,SMC4,SPP1,SPRY4,ST8SIA4,TAGLN,TGIF1,TIMP2,TNC,TNFAIP6,TNFRSF21,T…	1064 (24)
SMAD1	0.163	transcription regulator		0.074	5.87e-12	ACTA2,ALPL,BCL2L1,BTG2,CCN2,CDKN1A,COCH,COL4A1,CSF1,GADD45B,GDNF,HHEX,IBSP,MYC,PDGFA,PDGFB,RUNX2,SELE,SMAD7,SOX9,SPP1,TBX20,VCAM1,VEGFA	1051 (22)
IRF4	2.778	transcription regulator		0.074	5.32e-07	ACP5,ALPK2,ALPL,ANGPT1,BACH2,BNIP3,CASP10,CCL17,CCR7,CDK6,CEMIP2,CFLAR,CTSS,DOCK8,ENTPD1,EOMES,ERBB3,EZR,FASLG,FLT1,IL12B,IL1R1,IL6,IL9,INPP5D,IRF4,IRF5,IRF9,ITGB1,MYC,NFATC2,NFKB1,PDCD6,PLSCR1,RHOB,RUNX2,SH3KBP1,SPP1,SREBF1,STK17B,TMSB4X,TNFRSF8,TNFRSF9,VEGFA,XCL1,YWHAH	997 (18)
ZIC5		transcription regulator		0.073	0.0191	CDH1,MYC,TMPRSS2,TWIST1
NEUROD1		transcription regulator		0.062	0.0137	ABCC8,ACTN4,ATP2A2,CDK5R1,CDKN1A,CHGA,DCX,JUND,PCSK2,SCG5,SCNN1B,SYP
PITX2	-0.06	transcription regulator		0.059	1.81e-05	ATP1A1,CACNA1G,CDH1,COL8A1,COL8A2,CYP26A1,DACH1,DLX2,EGR1,EOMES,GATA2,GRHPR,HCN4,IRF6,ISL1,ITGAV,ITGB1,KCNK2,KCTD1,MSC,MSRA,MYC,NGFR,NPPA,NXN,PITX1,PLOD2,PPP1R1B,TBX1,TBX3,TBX5,VIM,WNT5A	842 (21)
FOSB		transcription regulator		0.051	0.00363	BDNF,CEBPB,F3,FOS,INHBA,MMP1,MMP9,PPARG,RUNX2,SERPINB2	1030 (21)
HHEX	1.301	transcription regulator		0.025	0.00158	AMOTL2,ANKRD1,CCN1,CCN2,CX3CL1,FGF2,FLT1,IL15,ITGAV,LATS2,VEGFA	666 (12)
HDAC2	-0.017	transcription regulator		0.02	1.86e-08	ACAN,ACTA2,ALOX5,APOA1,ASCL2,CD34,CDH1,CDKN1A,DPT,EGR1,F3,FABP1,FAM107A,FAS,GABARAPL1,IL12B,IL6,IL9,INPP5F,ITGB8,LHCGR,MCM3,MMP9,MYC,MYO1F,OLFM4,PDGFB,PLAU,PREX1,PTGS2,RARB,RHOB,RRM2B,SFRP1,SOX11,SOX9,TAGLN,TERT,TNFRSF19,TNNI2,TP63,TRPC6	874 (21)
CALR	-0.085	transcription regulator		0.015	0.000168	ATP2A2,B4GALT1,CDKN1A,CRABP2,FN1,GJA1,GJA5,ITGA5,LPL,MEF2C,PTGS2,SCNN1G,SREBF1,TGFB1,VCL	746 (22)
RBBP5	-0.361	transcription regulator		0	0.00287	CDH1,CTSD,ITGB1,MYC,PFKFB3
POU3F2		transcription regulator		0	0.0365	CDK5R1,CDK5R2,CHGA,FABP7,SYP
POU3F1		transcription regulator		0	0.0447	CNP,EGR2,GNRH1,KRT14,SKI
TCF4	0.145	transcription regulator		-0.022	2.87e-07	ANGPTL4,ARHGEF6,ASCL1,B4GALT1,BACH2,BHLHE40,BNIP3,CADM1,CCL21,CD2,CD55,CDH1,CDK6,CDKN1A,CDKN1C,CREB3L2,CSRNP1,DACH1,DNAJC12,DPT,DSTN,EAF2,ECEL1,ENTPD1,EPCAM,EYA1,FAS,FASLG,GP9,GRB14,HTR2B,IGFBP4,IL12B,IL15,IL16,IL6,IL9,INHBA,ITGB3,KALRN,LAMA4,LEPROTL1,LMO2,MCL1,MEF2B,MEF2C,MYC,NANOS1,NEDD9,NELL1,NGFR,PACSIN1,PAK5,PDE7B,PLK2,PTGS2,RUNX2,SDC2,SERPINF1,SH3BP5,SHISA5,SMAD7,SOCS3,SORBS2,SOX9,THPO,TMEM…	532 (11)
MEIS2	-0.238	transcription regulator		-0.046	3.06e-05	ALDH1A2,ALX4,CDH1,COL9A1,DRD1,OSR1,RUNX2,SOX11,TWIST1,WNT5A,XCL1
RB1	0.718	transcription regulator		-0.053	1.19e-10	ACTB,ACTC1,ALPL,ANGPT2,ATF3,ATP1A1,BAK1,BNIP3,CAP1,CCN2,CD44,CDH1,CDK5R1,CDKN1A,CDKN1C,COL4A1,COL4A2,CSF3,CYSLTR1,DONSON,DUSP1,E2F7,EDNRA,EGR1,EGR3,ENTPD8,EOMES,EZR,F3,FABP4,FANCA,FAS,FGF2,FLT1,FN1,FOS,FST,GADD45B,GNAI1,GPR142,GPR157,GPR27,GPR4,GPR63,GPRC5A,GPRC5C,GPT2,HOMER1,IGF1R,IL16,IL6,ITGAV,JUN,KIT,LAMC1,LRAT,MAF,MAPK4,MCM3,MECR,MEF2C,MET,MSN,MSX1,MYB,MYBPC1,MYC,MYH7,MYL1,MYOM2,NFKB1,NPY,NR…	984 (19)
RUNX1	3.685	transcription regulator		-0.073	8.94e-10	ACTA2,ALOX5AP,ANK1,ANXA2,ATF3,BLK,BTG2,CD34,CDH1,CDKN1A,CDKN1C,COL4A1,CREB5,CSF1,CSF1R,CYB561,DEPTOR,EGR2,FAP,FAS,FN1,FOSL2,FSCN1,GATA2,HBE1,HEY2,HMGA2,IRF5,ITGA11,ITGA2,ITGA9,ITGAV,ITGB1,ITGB2,ITGB3,KIT,KLF2,LCP2,LMO1,LUM,MET,MMP9,MYB,MYC,MYH9,NR4A3,PODXL,PRKCB,RGCC,RHAG,RUNX1,RUNX2,SLC4A1,SOX17,SOX4,SOX6,SOX9,SPI1,SPP1,SPTB,ST3GAL5,TAL1,TSPAN32,TWIST1,UPP1,VEGFA,VIM,XCL1	1005 (19)
HUWE1		transcription regulator		-0.073	1.45e-06	A4GNT,ACACB,ACADL,ACLY,ACOX2,AKR1D1,AOX1,APOA1,CD36,CDKN1A,CIDEA,CIDEC,EHHADH,ELOVL5,ENPEP,FABP1,FADS1,FADS2,GLS2,GPT2,INSIG1,MYC,PHOSPHO1,PNPLA3,PPARG,SREBF1,STARD10,TUBB2A	991 (17)
HMGB2	-0.127	transcription regulator		-0.09	0.000283	ADIPOQ,CD36,CEBPB,CSF3,FABP4,IL6,INHBA,LPL,MMP1,PHLDA1,PPARG,RUNX2,TGFB3	1152 (22)
FOXK2	0.815	transcription regulator		-0.092	0.00462	ACTA2,CDH1,HK2,MCM3,PDK2,PFKM,VEGFA	520 (7)
CTCF	-0.486	transcription regulator		-0.097	0.00362	ADRA2C,APOA1,ARC,BDNF,C1QL1,CCL17,CDH1,CDKN1A,CDKN1C,DOT1L,DRD1,EGR1,EOMES,ERRFI1,FADS1,FST,GBX2,IL1R1,IL6,ITGA8,LIF,MUC2,MYC,MYOD1,PTGS2,TGFB3,TLR2,VEGFA	1161 (26)
FOXC1		transcription regulator		-0.111	2.42e-06	ALPL,ECM1,EFNB2,EGR1,ELF3,FOS,GATA2,GDNF,IFI35,IRF6,ITGB3,JUN,KLF2,KLF5,KLF6,LFNG,MAFB,MAFF,MMP9,MX1,MYB,MYC,OASL,OSR1,PHEX,RUNX1,RUNX2,SAMHD1,SFN,SOCS3,SOX6,SOX9,SPP1,SSTR2,SYT6,TBX1,TINCR,WNT5A	1060 (24)
CERS6	3.36	transcription regulator		-0.128	0.0292	ABCB1,CD36,CIDEC,PLIN5,PPARG
PROX1	-2.275	transcription regulator		-0.129	4.27e-05	ANGPT2,CCL26,CD34,CDKN1A,CDKN1C,CHGA,CHGB,CRYBB1,FGFR4,ITGA9,MMP9,MYL1,RGS4,SCG2,SYP,THY1,TNNI2,TNNT3	805 (17)
ID2	-1.063	transcription regulator		-0.151	1.7e-13	ACTA2,ASCL2,AXIN2,BATF,BCL2L1,BTG2,CCR2,CCR7,CD44,CDH1,CDKN1A,CDKN1C,CEBPB,CSF1,DUSP1,DUSP10,DUSP4,EGR2,EGR4,EOMES,FAS,GADD45B,IGFBP4,IL2RB,INHBB,IRF4,IRF5,IRF6,ITGB3,KLF6,LAMA4,LMO2,MAF,MAP2K6,MYB,MYC,NFKBIE,NGFR,NR4A1,NR4A3,OLFM4,PDGFA,PIK3IP1,PTPN14,PTPN5,RAPGEF4,SDC1,SEMA3F,SMAD7,SMOC2,SOCS3,SOX4,SOX9,STAT4,TF,TNFRSF19,TNFRSF4,TOX2,TRAF3,TRAF5,TUBA1A,VCAM1	1019 (28)
ATXN1	-0.019	transcription regulator		-0.152	0.032	ATP2A2,CD44,CHN2,ETV4,MTSS1,SLC1A6,VEGFA
EGR4	5.413	transcription regulator		-0.152	0.0052	CYP17A1,EGR1,EGR2,MYBL1
MLX		transcription regulator		-0.191	0.0048	ACACB,ACLY,ACOX3,ARRDC4,ATF3,CCN3,DIO1,ELOVL5,EOMES,FADS2,FAS,IL16,OXSM,THBS2	107 (3)
TRIM24	0.72	transcription regulator		-0.2	0.000521	ANGPT1,ANXA1,CMPK2,CSRP1,CYP24A1,EHD4,FBN1,FERMT2,IFI27L2,IFI35,IL1R1,IRF9,LGALS3,MOV10,MYB,NLRP3,NPAS3,PACSIN3,PLAU,PRPS2,PTHLH,S100A11,SAMHD1,SHISA5,SOX4,SPP1,TGFBI,TLR2,VEGFA	941 (18)
MEOX2	-0.151	transcription regulator		-0.21	7.77e-07	ANGPT1,CDH1,CDKN1A,CDKN1C,CTSS,EDN1,F3,FGF2,HBEGF,IL6,ITGAV,ITGB3,NKX3-2,SELE,VCAM1,VCL,VIM	873 (14)
SMARCD3	-1.598	transcription regulator		-0.218	7.82e-06	ACAN,CD44,DEPTOR,FMOD,KLF4,MGP,NPPA,SOX6,SOX9,TBXT,WNT5A	456 (7)
ZBTB22	-0.291	transcription regulator		-0.218	0.0265	ACADL,PPARG,PPARGC1A,SREBF1
SOX8	1.546	transcription regulator		-0.218	0.0352	IBSP,PHEX,PLP1,RUNX2
MAFA	-0.87	transcription regulator		-0.239	4e-09	ABCC8,ALDOB,ANKRD1,CACNA1E,CACNA1G,CCK,CCR7,CDKN1A,CHGA,CHGB,CHRNA4,CLCF1,CSF3,CYSLTR1,EDAR,ERBB3,FGF2,HRH2,HTR2A,HTR7,IL12B,IL2RB,IL6,LAMC1,LGALS3,MAP2K1,MCL1,MT3,MYLK,NGF,NGFR,NOS1,OXTR,PCSK2,PLAU,PRKCD,PTPRN,STEAP3,TBX3,TNFRSF19,TTR,UCN3,VEGFA	671 (14)
SNAI2	-0.02	transcription regulator		-0.244	3.24e-07	ACAN,ANKRD1,CCN1,CCN2,CD44,CDH1,CDH3,CDKN1A,CLDN1,DUSP6,ECM1,EGR2,ELF3,EPCAM,FN1,FOXD3,IBSP,ITGB1,JUP,KLF4,MEF2C,MMP9,MYC,MYH7,MYOD1,MYOM3,RUNX2,SOX9,TAGLN,TNNC2,TP63,TRPS1,TWIST2,VIM	769 (21)
HDAC7	0.691	transcription regulator		-0.245	0.000182	CD44,CDH1,CDKN1A,EDN1,ETNPPL,IL12B,IL6,NPPA,NR4A1,SLC1A2	784 (21)
NFKBIB	-0.335	transcription regulator		-0.245	5.61e-05	BCL2L1,CFLAR,DAPK1,EGR1,FASLG,FGF10,IGF1R,IL6,MMP9,NOS3,PLAU,SELE,SMAD7,SYTL1,VCAM1,VEGFA	748 (15)
IRF8	-0.084	transcription regulator		-0.248	8.4e-06	ARC,ARID5B,ATF3,BCL2L1,CACNA1G,CCR2,CCR7,CDKN1A,CSF1R,CTSS,CUX2,EGR1,EGR2,FAS,FOS,GABRG3,HCN1,HCN3,IGSF9B,IL12B,IL15,IL6,IRF4,IRF5,ITPR3,KCNJ5,KLF4,KLF6,LIF,MAF,MAFB,MAP4K4,MET,MMP9,MYC,NFKB1,SHISA8,TBX18,TERT,TREM2,TWIST2	1000 (15)
SIM2		transcription regulator		-0.264	0.00345	BNIP3,CDH1,DBN1,KRT14,MUC2,MYOD1,TIMP2
IFI16		transcription regulator		-0.268	0.000457	ACLY,AREG,CCL4,CDKN1A,CYP1A1,EDN1,FAS,FSHR,IL2RB,LPL,MAP2K1,MGST1,MYC,NPPA,PIM1,SELE,TERT,VCAM1	974 (23)
PTF1A		transcription regulator		-0.302	0.0403	CADPS2,GBX2,GRIK1,IPCEF1,ISL1,KLHL14,LAMP5,NPY,RORB,SSTR2,ZMAT4
POU4F1		transcription regulator		-0.303	2.94e-07	ACTC1,BCL2L1,BNC1,CDKN1A,CLIC6,DAB1,EPHA8,ETV4,EYA1,FGF13,GBX2,HOXB5,INA,IRX1,IRX2,KCNIP1,KCNMA1,MSC,MYL1,NPY,NR4A2,NWD2,PAPPA2,RBM24,RTN4RL2,RUNX1,SNAP25,SNCG,SSTR4,TAC1
GRHL2		transcription regulator		-0.33	0.00113	ARHGEF28,CDH1,EFEMP1,ERBB3,MMP1,MYB,MYC,SEMA3C,TERT,TP63	865 (11)
FOXA3		transcription regulator		-0.35	0.00289	CIDEA,CYP3A4,CYP3A5,JUN,MYC,PPARGC1A,SLC27A1,TBX1,TF,TMEM26,TNFRSF9,TTR	888 (13)
BHLHE41	0.888	transcription regulator		-0.351	0.0177	ANGPTL4,CA9,HK2,MEF2C,MYOD1
MSX1	3.091	transcription regulator		-0.355	0.00996	CDKN1A,EGR2,GJA1,MSX1,MYOD1,RUNX2,SFRP1
PRDM1	0.538	transcription regulator		-0.369	3.02e-06	ACOX2,ADAM8,AFF3,ALPL,ANGPTL4,AQP3,ARG2,AXIN2,BMP5,BTK,CA9,CADPS2,CCR7,CD44,CD48,CDK6,CLDN1,CRISPLD2,CSF3,ECM1,EGR2,ERG,EVA1A,FAM167A,FGG,FOS,HHEX,IGF1R,IL6,IRF4,ISL1,LGALS3,LRRN1,MAF,MAFB,MALL,MAP3K5,MCL1,MSC,MYC,NLRP3,PCSK6,PROX1,PSD2,PTPN6,RAPGEF3,RGS18,SCARA5,SLC25A37,SLCO2B1,SOX8,STAT4,TAPBP,TNFAIP6,TNFRSF13B,TTR	1130 (19)
NFE2L2	-0.403	transcription regulator		-0.37	1.25e-10	ABCB11,ACE,ACP5,ACTA2,ACTC1,AKR1B10,ANGPT1,AOX1,AREG,ARID5B,ATF3,ATP1A1,BASP1,BCL2L1,BDNF,BNIP3,C1QA,C1QC,C3,CBS,CCN2,CCR2,CD247,CD34,CD36,CDH1,CDKN1A,CFD,CHGB,CLDN1,CNMD,COL4A2,CSF1,CTSD,CYP1A1,DSTN,DUSP10,EDNRB,EIF2AK3,ENTPD1,ERRFI1,F10,F13A1,FABP1,FABP4,FABP5,FGF13,FN1,GADD45B,GDF15,GPR157,HBEGF,HK2,HMGCS1,HTATIP2,IFRD1,IL6,IRF9,JPH2,LCP2,LIF,LPL,LUM,LY6E,MAF,MAFF,MATK,MCTP1,MEF2C,MGST1,MMP9,M…	986 (15)
FOXO4	0.466	transcription regulator		-0.373	4.32e-14	ACAN,ACLY,ANGPT1,APLN,BCL2L1,BNIP3,C1QA,CCN2,CDH5,CDKN1A,CH25H,COL4A1,COL4A2,EDNRB,ELOVL5,ENPEP,ERG,FABP4,FABP5,FASLG,FLNB,FMOD,GABARAPL1,GADD45B,HMGCR,HMGCS1,IL1R1,ITGB2,LCP2,LRAT,MMP9,PRCP,PRG4,PRKAA2,PRKCD,RUNX2,SESN3,SOX9,TGFB1,VCAM1,VEGFA,ZFAND5	853 (14)
GLIS1	2.007	transcription regulator		-0.378	0.00235	ADAMTS10,COL16A1,COL4A1,COL4A2,COL8A2,EFEMP1,ESRRB,FBLN5,LOXL2,TIMP3
SMAD7	1.306	transcription regulator		-0.381	3.32e-13	ACAN,ACTA2,ADAMTS2,ALDOB,AREG,BCL2L1,BGN,BIRC2,BMP5,BMPR1B,CCN2,CDKN1A,CFLAR,DCN,DEPTOR,EFEMP1,FAS,FN1,FST,HBEGF,IL12B,ITGA6,ITGA7,MATN2,MET,MMP1,MMP9,MYC,NID2,PLAT,PMEPA1,SCD,SEMA3F,SMAD7,SMURF2,SOX17,SOX9,TAGLN,TBXT,TERT,TGFA,TGFB1,TGFB2,TGFB3,TGFBI,TIMP3,TPM2,TPM3,VEGFA	741 (16)
SPI1	-2.422	transcription regulator		-0.389	0.000102	ACP5,ACTA2,ACTB,BTK,C1QC,CCL17,CCL4,CCR7,CD79B,CDK6,CDKN1A,CDKN1C,CMPK2,CSF1,CSF1R,CTSS,CXCL14,DUSP6,EGR2,FASLG,FOS,GATA2,HELZ2,HK2,IKZF1,IL12B,IL6,IL9,IRF4,IRF9,ITGA5,ITGB2,JUN,KIT,KLF4,LMO2,LY6E,MCL1,MEF2C,MME,MMP1,MX1,MYB,MYC,NCF2,NCF4,NOX4,OASL,PTGS2,PTPN6,SPI1,SPP1,TGFB1,TLR2,VAV1,VEGFA,VIM	978 (15)
HOXA4	0.485	transcription regulator		-0.389	3.06e-06	ACTA2,ANKRD1,CCN1,CCN2,ITGB1,MYC,TAGLN,TAGLN2,TGFB2	777 (15)
ZBTB33	0.378	transcription regulator		-0.397	0.00672	CDH1,CDKN1A,FAS,MYC,THBS1,TNFRSF10B	602 (11)
NCOR1	-0.037	transcription regulator		-0.403	0.000172	ABCB11,ACADL,ACADSB,ADIPOQ,APOF,AQP3,ATP1A1,CD82,CDH1,CDKN1A,CYP17A1,DIO1,DUSP1,HAS2,IKZF1,IL15,MB,MMP9,MYD88,MYOD1,PDK4,PIM1,PPARG,PTGDS,PTGS2,RARB,SERPINF1,SREBF1	991 (22)
NKX2-5	-0.939	transcription regulator		-0.421	0.00359	ACTA2,ANKRD1,BMP10,GJA1,GJA5,HAND1,HOPX,MEF2C,MYLK,NPPA,TBX5	854 (17)
CBX5	0.515	transcription regulator		-0.426	0.0029	ABCB1,AGR2,ASCL2,AXIN2,CDKN1A,CEMIP,FGFBP1,GASK1B,GCHFR,GRHL3,ITGA7,KIT,LAMB3,PPARG,PPFIBP2,QPCT,RUNX2,SCG5,SELENBP1,SNTB1,TGFBI,TM4SF1,TNFRSF6B,TSPAN13
HTT	0.368	transcription regulator		-0.444	7.03e-27	ABCC10,ACLY,ACOT7,ACTA2,ACYP2,ADAMTS2,ADAMTS4,ADCY5,AGPAT4,AK5,ANTKMT,APOA1,ATF3,ATP1A1,ATP2A2,ATP8A1,ATPAF1,BASP1,BDNF,BHLHE40,BIRC2,BMP3,CA4,CAVIN3,CBLN1,CBX4,CCK,CCN2,CCN4,CDH8,CDKN1A,CDO1,CEBPB,CHKA,CHRNB2,CHST11,CLDN1,CLIC6,COCH,COL16A1,COL4A1,COL4A2,CPLX2,CPNE5,CRYAB,CSF1R,CTSD,CX3CL1,DCN,DLX3,DNAI1,DRD1,DRD3,DUSP5,DUSP6,EDNRB,EGR1,EGR2,EPB41L3,ESRRB,ETNPPL,EVL,FABP7,FADS1,FGF1,FN1,FOLH1,FO…	1127 (21)
WWC1	0.676	transcription regulator		-0.447	0.0132	CCN2,CDH1,FGF1,PDGFB,VIM
PIAS4	0.048	transcription regulator		-0.447	0.0177	FABP1,IL12B,ITGB8,PCDH9,PDK4
NDN		transcription regulator		-0.447	0.0177	CDKN1A,MYC,NUCB2,PPARG,SYP
SND1		transcription regulator		-0.455	0.000444	ANGPTL4,CAMSAP2,CCNJL,CDH1,CKS1B,CLDN1,DENND5A,DLX5,DMBT1,EMP1,FASTKD1,GABRG3,IQGAP3,IRX1,IRX2,KIF5C,LAPTM5,MAFB,NR2F1,NXNL2,PMEPA1,PPM1E,PTGS2,QPCT,RAB3B,RGS8,RORB,SLCO4A1,SMURF1,SOX4,SYT17,TAC1,TESC,TNFRSF21,VIM,ZNF536	419 (7)
HNF1B		transcription regulator		-0.456	2.67e-05	ACTN1,AGR2,ALDOB,ARG2,ATP10A,AXIN2,BGN,BHLHE40,CD44,CD99,CDH1,CLDN1,DUSP1,FN1,HMGA2,ITGB6,LIPG,LUM,MAFB,MET,MTCL3,NEDD9,NID2,OLFM1,PHACTR4,PLAU,PLEK2,PODXL,PSTPIP2,S100A6,SCNN1G,SEMA3C,SRC,ST6GALNAC1,TTR,UPP1
ERF		transcription regulator		-0.458	0.0154	BNC1,CDH1,COL17A1,MYC,PTCH2,TP63,WNT7A
HIC1	0.814	transcription regulator		-0.46	2.54e-07	ACKR3,ACTA2,ADORA2B,CCN3,CDKN1A,CDKN1C,CDO1,CXCL14,CYP24A1,EPHA2,FADS1,FHL2,FST,INHBA,LIF,LRP8,SNAP25,SNAPC1,SOX9,SPP1,TNFAIP8	581 (11)
NKX2-3	-0.002	transcription regulator		-0.483	3.71e-08	ACTA2,ADAP1,ALPL,ANGPT2,ANGPTL4,ARHGDIB,ASNS,BCHE,CBS,CD34,CD36,CDKN1A,CMPK2,CRYAB,CSRNP1,CX3CL1,EDN1,F2RL1,FGF2,FLRT2,GASK1B,GCH1,GDF15,HELZ2,HEY2,KLF2,KLF4,LY6E,MADCAM1,MAP2,MCTP1,MYD88,NOS3,NR2F1,PARP9,PIM3,PLD1,PLSCR1,PODXL,PRSS12,PSAT1,PTGS2,PTPRE,REEP1,SMAD7,TCIM,TMEM100,TRPC6,UACA,VCAM1	624 (7)
PDLIM1	2.522	transcription regulator		-0.492	0.0292	ACKR3,CDH1,IL6,PDLIM1,VIM
MED1	0.104	transcription regulator		-0.495	4.47e-14	ACACB,ACLY,ADAMTS18,ADCY5,ADIPOQ,ATP10D,BCL2L1,BHLHE40,CAPSL,CCN5,CCR7,CD79B,CDKN1A,CFD,CIDEA,CREB5,CYP17A1,CYP24A1,DIO1,EHHADH,ELK3,EPHA3,ESRRB,FABP4,FADS2,GFPT2,HAS2,HECW2,HGF,IKZF1,IL2RB,IRF4,JAKMIP1,KLF2,KLF4,KLF5,LAD1,LIF,MB,MCL1,MEF2C,MET,MMP1,MYC,MYH7,MYOD1,NID2,PDK4,PIM1,PODXL,PPARG,RABGAP1L,RARB,SERPINB2,SLC27A1,SLC36A4,SLC39A8,STC2,SYNPO2,TBX3,TERT,TGM2,THBS1,TMPRSS2,UNC5D	1051 (23)
ESX1		transcription regulator		-0.5	7.75e-06	ARHGAP28,CMKLR1,CX3CL1,CYP26A1,DUSP10,ELF3,FADS1,FGF13,HMGA2,KRAS,LGALS3,PDE1C,PRKAR2B,SPP1,TIMP3,TOX2,VIM
BRCA1	0.016	transcription regulator		-0.507	9.98e-08	ABCB1,ACTB,ANGPT1,AREG,ASCL2,BACH1,BAK1,BCL2L1,CDH3,CDKN1A,CTSD,CYP1A1,CYP3A4,EGR1,EZR,FAS,FHL2,GADD45B,GDF15,HMGA2,IGF1R,KIT,KRT17,MLH1,MX1,MYC,NEDD9,NOS3,PHLDA1,PLSCR1,POLR3E,ROBO1,RRM2B,SAT1,SFN,TBXT,TERT,TNFAIP2,TP63,TWIST1,VCAN,VEGFA,VIM,WEE1	1103 (19)
DLX6		transcription regulator		-0.524	0.00672	CYP26A1,FOXL2,GBX2,HAND1,HGF,RGS5
HAND1	-1.879	transcription regulator		-0.53	7.93e-06	ANGPT1,ARC,CHRDL2,CTTNBP2,EDN1,EFNB2,FABP4,FLT1,HAND1,HKDC1,KIT,NPPA,OSR1,PITX1,SMPX,XCL1
SOX2	-0.695	transcription regulator		-0.531	7.13e-25	ACKR3,ADAMTS4,ALOX5,ANGPT1,APC,APCDD1,ARPC1B,ASCL1,ASCL2,ATF3,ATG10,AXIN2,BCL2L1,BHLHE40,C1QL1,CCN2,CCN4,CCN5,CD44,CDH1,CDKN1A,CDKN1C,CEMIP2,CHST3,CNP,COL9A3,CRABP2,CREB3L2,CSF1R,CTNNAL1,CXCL14,CYP26A1,DLX2,DLX3,DLX5,DUSP1,DUSP4,DUSP5,EFEMP1,ELF3,EOMES,EPCAM,EPHA2,ESRRB,ETV4,EVPL,FABP1,FABP7,FGFR4,FLT1,FOS,FOXD3,FST,GADD45B,GATA2,GBX2,GDF3,GJA1,GJC2,GRHL3,GSN,HAND1,HHAT,HMGA2,HOPX,IER5,IL6,INAVA,…	1156 (27)
MITF	-0.463	transcription regulator		-0.554	0.000268	ACAN,ACP5,APC,APOLD1,ATP1A1,CAPN3,CD44,CDK5R1,CDKN1A,CHKA,CRYBG1,DAPK1,EDNRB,FANCA,FMOD,FN1,FOS,FOXD3,GYG2,HPGDS,IRF4,KCNN2,KIT,LGALS3,MET,MGP,NGFR,NPM3,PHACTR1,PPARGC1A,PPM1H,QDPR,SCD,SDC1,SEMA3C,SERPINF1,SHTN1,SLC19A2,SLC24A5,SOX6,SOX9,TBXT,TERT,UPP1,VIM,XCL1	938 (20)
SIX1	0.982	transcription regulator		-0.564	3.95e-18	ACTC1,BHLHE40,CD36,CDH1,CDKN1A,CDKN1C,CFD,CRYAB,CSRP3,DACH1,DACH2,DES,DLX5,ENC1,ERBB3,FABP3,FGF10,FN1,FST,GPT2,GREM1,HBEGF,HSPB8,ITGA7,ITGB1,KCNH2,KLF5,LDB3,LFNG,MEF2C,MRAS,MYL1,MYLK,MYO1C,MYOD1,MYOM2,MYOM3,MYOZ1,REEP1,RTN1,SGCA,SGCD,SORBS1,TAGLN,THY1,TNNC2,TNNI2,TPM2,TWIST2,VCL,VIM,WT1	940 (24)
YY1		transcription regulator		-0.591	1.31e-11	ABCB1,ACTA2,ACTC1,ANKRD1,BAK1,BCL2L1,BDNF,BIK,BTG2,CD34,CDH1,CDKN1A,CDKN1C,CEBPB,CHGA,CHRDL1,COL19A1,COL9A3,CRYAB,CSF1,CYP24A1,DKK2,DLX3,DNAJB4,EDN1,EGR1,EGR2,FAS,FOS,FZD8,HAS2,HBZ,HK2,HMGCR,IGFBP4,IL1R1,KIF23,KLF2,KLF4,LATS2,LRP2,MCL1,MYC,MYL1,MYOD1,NGFR,NOG,NSG1,PDGFA,PLAU,PLP1,PROX1,PTBP3,RAD51AP1,RND3,ROBO1,SDC1,SHC2,SINHCAF,SLC1A2,SLC1A3,SLC25A4,SRC,SYP,TAGLN,TGFB2,TGFBI,TGM2,TNFRSF10B,TNFRS…	1117 (21)
HOXB5	-3.165	transcription regulator		-0.6	0.00171	ANGPT2,ITGAV,ITGB3,MMP1,PLAU
ATF1	0.336	transcription regulator		-0.606	5.12e-05	ATP1A1,CALCA,CCK,CEBPB,COL24A1,EGR1,FOS,INHBA,JUN,NOX1,NTS,PTGS2,TEAD1,THBS1	622 (12)
PAX1		transcription regulator		-0.607	0.000458	ASCL1,CRABP2,DLX3,EVPL,GBX2,GRHL3,IRF6,KRT14,KRT17,KRT7,NKX3-2,SOX9,THY1
ZFPM2	-0.698	transcription regulator		-0.61	0.000828	ALPL,ATP2A2,CYP17A1,HAND1,MYH7,NPPA,SOX9	187 (7)
LMX1B		transcription regulator		-0.618	0.0384	CD2AP,COL4A3,COL4A4,CORIN,GBX2,NR4A2,ULK1,WIPF3
MEN1		transcription regulator		-0.633	2.47e-11	ACTA2,ASCL2,CD44,CDH1,CDKN1A,CHGB,CNTFR,CSF1,ETV4,FABP4,FABP5,FABP7,FGF13,FN1,FOS,GABRB3,GFRA2,GFRA4,GRP,HOXB5,IGFBP2,IL6,INA,INHBB,MN1,MYC,NFIA,NFIB,NFKB1,NGFR,NOS1,NSG1,P2RY12,PTN,RUNX2,SCD,SLC1A3,SNCG,SOX11,SOX6,SOX9,SSTR2,STMN3,SYN2,SYP,SYT6,TERT,TWIST1,VCAM1,VIM,VIP	975 (20)
RNF2	-0.599	transcription regulator		-0.639	0.00553	AKR1B10,ALX1,CBX4,CDH1,CDKN1A,EOMES,GDF15,HAND1,HEY2,LBX2,MCM3,PKIB,TMEFF2,VIM
HOXD10		transcription regulator		-0.64	0.0136	APOF,CAPN6,CD44,DAPP1,DOT1L,EZR,HBEGF,MAOB,NCS1,PAK1,RHOB,S100A11,TFPI,TIMP2
AIP	-0.229	transcription regulator		-0.655	1.19e-08	ACKR3,ADGRV1,AKAP5,CHRM2,CMKLR1,CYP1A1,CYSLTR1,DUSP1,F2RL1,GDNF,GNG4,GPRC5A,HTR1D,NPR3,PDE7B,PRKCD,PROKR1,RASGRP1,RGS18,RGS2,RGS4,RGS7	783 (7)
DUX4		transcription regulator		-0.659	0.0403	ACTC1,BIN1,CRYM,E2F7,FAIM2,IL15,IL6,MYOD1,NOG,SLC34A2,WNT5A
FOXP1	0.685	transcription regulator		-0.691	2.53e-07	BCL2L1,CDKN1A,CSF1R,DAB1,EGR2,GDF3,HCN1,HK2,HOPX,IL6,IRF4,JUN,KCNT1,LMO2,MEF2C,MTCL1,NFIA,NGEF,NLGN3,PDK4,PDPN,PIK3IP1,PPARGC1A,RASD1,SOX4,SPHKAP	977 (18)
PPARGC1B	-1.333	transcription regulator		-0.696	0.0152	ACACB,ACADL,C3,CIDEA,ERO1A,HK2,HMGCR,NPPA,PDK4,PHOSPHO1,PPARGC1B,RUNX2,SQLE,VEGFA
CDKN2B		transcription regulator		-0.707	0.00822	ASNS,ASS1,BCAT1,CTH,GLS2,GPT2,PRODH,PSAT1
MED13	0.654	transcription regulator		-0.714	0.000575	ANKRD1,CD36,CIDEA,CIDEC,HMGCR,LIF,MYC,NR4A2,ODAD2,PPARG,PRKAR2B,PRKN,SIK1	797 (7)
LMO2	-1.547	transcription regulator		-0.733	3.88e-09	ACOX2,ACTB,ANGPT1,ANXA1,AXIN2,BTK,CCR2,CD247,CD34,CD79B,CDH5,CDKN1A,COMT,DPP4,DUSP15,ERG,FBP1,FNDC3B,GJA1,GRB10,GSDME,GSN,HHEX,IL1RAP,KCTD17,KIT,KLF11,LHFPL2,LMCD1,MAP3K5,MEF2C,MYC,NDRG1,PCBP3,PDZD2,PISD,PSTPIP1,RAB11FIP4,RAB32,RAPGEF5,RASGRP1,RIPK2,RPL3L,RPS6KL1,SCARB2,SERPINF1,SKI,SLIT1,SPI1,SPRED1,SPRY2,STAT4,TAL1,TAMALIN,TBKBP1,TES,TGFB1,TGFB2,THY1,TLR2,TNFRSF10B,TNFRSF13B,TNFRSF8,TOR3A	676 (14)
SIN3A	0.527	transcription regulator		-0.762	0.00206	ACP5,BDNF,CDH1,CYP1A1,GADD45B,INA,KLF6,LHCGR,MMP9,MYC,PTGS2,RARB,SMAD7,SYT4,TERT	1084 (24)
ZFP36		transcription regulator		-0.789	0.00548	CD36,CDKN1A,CLMP,CTSS,FOS,IL12B,IL6,JUN,LATS2,LMO2,MMP1,OCSTAMP,PIM1,PLAU,PTGS2,SLC9B2,SOX6,SPP1,TLCD4,VCAM1	788 (15)
FOXP3		transcription regulator		-0.795	5.79e-09	AKT3,ANXA1,CCR2,CCR7,CDKN1A,CSF1,CYSLTR1,DUSP4,DUSP6,EGR1,ENTPD1,EOMES,FASLG,FGL2,FOS,FOSL2,IGF1R,IGFBP4,IGSF3,IL12RB2,IL2RB,IL6,IL9,IRF4,JMY,JUN,KLF4,LATS2,LGALS3,MAF,MMP9,NFKB1,NR4A1,NR4A3,PPARG,RRM2B,RUNX1,SDC4,SLC16A3,SLCO4A1,SMAD7,TGFB1,TGM2,TNFRSF4,TTR,VEGFA,VIPR1	959 (15)
SATB1	-1.016	transcription regulator		-0.836	2.67e-05	ACTN1,ADCY3,APC,CCN2,CDH1,CDKN1A,CEMIP2,CTSD,DCP1A,DUSP4,FASLG,FERMT2,GADD45B,GDF15,GNG4,GPT2,HELZ2,IKZF1,IL16,ITGB1,KLF2,MAF,MAL,NR4A2,PGR,PIK3IP1,PRKCB,PTGS2,RUNX1,SPI1,TGFA,TNFRSF8,TRPS1,TSPAN17,UHRF1,VIM	886 (14)
DMRT1	-0.509	transcription regulator		-0.863	0.000679	ADAMTS19,ADAMTS20,CADM1,CDH1,COL4A3,DMRT2,FGF10,FOXL2,GJA3,IGF1R,ISLR2,MAP2K6,MAPK4,MMP24,SLC1A1,TAB1,TOX2,TRIM50,VCL,VSIG1,ZAR1
BACH2	1.38	transcription regulator		-0.864	0.00498	BATF,FAM20C,IL12RB2,IL6,IL9,IRF4,JUN,LAMC1,MAF,MAFB,MCL1,RARB,SDC1,STAT4,TNFRSF4	978 (19)
GATA3	-0.161	transcription regulator		-0.876	6.89e-08	ANGPTL4,ASCL1,BATF,BCAS3,BCL2L1,BIK,CCL4,CCR2,CDH1,CDKN1A,CHST2,CRABP2,CSF1R,DLX3,DRAM2,EOMES,ERG,EVPL,FN1,FOS,FSCN1,GRHL3,HSD17B1,IL12RB2,IL2RB,IL6,IL9,IRF6,KIT,KLF4,KRT14,KRT17,LOX,MAF,MYC,NFKB1,NPPA,PPARG,PRODH,RCAN1,RGCC,RUNX1,SLCO4C1,SPI1,STAT4,TAL1,TBX3,TGFB1,TGM2,TJP2,TNFRSF9,VCAM1,VEGFA,VIM,ZBTB7B	1028 (18)
PAX2	0.121	transcription regulator		-0.887	0.000599	ALDH1A2,ITGAV,ITGB3,KIT,OSR1,SFRP2,SOX8,SSTR2,WFDC2,WNT5A,WT1
DACH1	1.336	transcription regulator		-0.888	3.81e-05	CDKN1A,EFEMP1,EGR1,FGF2,FOS,IL6,JUN,KLF4,MEF2C,PLAT,PTGS2,SOCS3,STC2,TGFB1	870 (17)
TSHZ3	0.095	transcription regulator		-0.893	0.0201	COL23A1,CRYM,ELMOD1,FGF10,FMOD,FOSL2,NGFR,NPY,NR4A1,RAMP3,SLC1A2
SMARCA5	1.665	transcription regulator		-0.898	4.32e-06	ALOX5AP,ALPK1,ASS1,BLK,CACNA1E,CD44,CDH1,CDKN1A,CORO2A,CRIP1,ENC1,EPHA2,ERG,FAS,GFRA1,GRIA3,IGFBP4,IL12RB2,KIT,LFNG,MAST4,MYL10,OSGIN1,PHLDA1,PLK2,PRSS57,RAB44,RNF19B,SMOC1,TSPAN32,WDFY4	440 (7)
REST	0.462	transcription regulator		-0.9	1.51e-08	ALOX5,ARK2C,ASCL1,ASCL2,ATF3,B3GAT1,BDNF,C1QA,C1QB,CBLN1,CHGB,CHRNB2,CMKLR1,DCX,DRD3,EOMES,INA,JUN,KCNAB2,KCNQ4,KCNQ5,LRRTM4,MAP6,MAPK8IP1,MYC,NELL1,NPPA,OSBP2,P2RY4,PENK,PHKB,PTPRN,RGS7,SCG2,SNAP25,SOX11,STMN3,SYP,SYT4,TAC1,TBXT,TERT,VIP,XKR4	1066 (22)
ARID4B	0.768	transcription regulator		-0.912	0.000311	ADORA2B,DNAJA4,HOXB5,HTATIP2,INHA,LRRC17,PENK,PLXNA2,PTGDS,TAL1,TINAGL1,TWIST1,UAP1L1,WNT7A
TSC22D3		transcription regulator		-0.934	5.61e-05	ADIPOQ,ANXA1,CDKN1A,DUSP1,EGR2,EGR3,FASLG,IL6,NFKB1,PPARG,PTGS2,RUNX2,SELE,SMURF1,SMURF2,TLR2	1029 (16)
DAXX	0.442	transcription regulator		-0.942	3.35e-05	CASP10,CDKN1A,CSF1,FASLG,HMGCR,HMGCS1,IKBKE,IL6,MAVS,MMP1,MRAS,NFKB1,RTN1,SREBF1,TMTC1,TRAF3	977 (17)
HOXA11		transcription regulator		-0.943	0.00345	ANXA1,GDNF,ITGA8,KLF2,PDGFA,RUNX2,SPP1
ATOH1		transcription regulator		-0.962	0.0439	CDKN1C,CUX2,MUC2,MYO7A,NOS1,RASD2,RBM24,SLC17A6
CREBZF	-0.28	transcription regulator		-0.986	0.021	CEBPB,CIDEA,CYP17A1,DNAJB9,INSIG1,PDK4,PPARGC1A,SREBF1
BMI1	0.626	transcription regulator		-0.992	1.81e-05	BLK,BNIP3,BTG2,CADM1,CD44,CDH1,CDK6,CDKN1A,CSF1,FAS,GADD45B,GFRA2,HK2,HMGA2,HOXA1,HOXB5,IL12B,IL17RD,IL6,LOX,MAF,MCM3,MET,MYC,NFKB1,NGFR,NPPA,PARP9,SAP30,SCN4B,SFN,TERT,TGFB2,TUSC3,VIM,WNT5A	936 (17)
ZNF382		transcription regulator		-1	0.0052	CDK6,HMGA2,IKBKE,MYC
IRX4		transcription regulator		-1	0.0191	HAND1,IRX2,MYH7,NPPA
ARID2	-0.417	transcription regulator		-1	3.35e-05	ALPL,BLK,CCN4,CHST11,COL8A1,EFNB2,FOS,HEG1,HTR7,KIRREL3,MEF2C,PTPRN,SCG2,SPRY2,THBS1,WNT5A
ZBED6		transcription regulator		-1	0.00146	ARHGEF1,COL13A1,CRIM1,FOSL2,KCTD1,MB21D2,MYBL1,PMEPA1,ROCK2,UPP1
ATRX	0.469	transcription regulator		-1	0.0132	AFF3,CSF1,MRAS,RTN1,TMTC1
KLF11	1.33	transcription regulator		-1.006	1.25e-13	ACAN,ACTA2,ADAMTS13,CCN2,CCR2,CEBPB,CHRM2,CHRM3,CHRNA4,CHRNB2,DCN,EDN1,FABP3,FASLG,GREM1,HGF,IL12B,ITGA2,ITGAV,ITGB3,ITGB6,ITGB8,LOX,MAOB,MMP1,MMP9,MYC,NFKB1,PDGFA,PDGFB,PDK4,PLAT,PLAU,PPARG,PPARGC1A,SMAD7,SOX9,TGFB1,TGFB2,TGFB3,TGIF1,THBS1,THBS2,TIMP2,TIMP3,VEGFA	987 (21)
MAFB	-1.987	transcription regulator		-1.016	5.67e-07	ACTB,ACTN1,ALDOB,BTBD17,CAP1,CCK,CCL4,CD2AP,CMKLR1,CNN2,CRYBB1,EGR2,F13A1,FBLN5,GFRA2,GSDMA,HS3ST1,HTR2B,LGALS3,MAFB,MMP9,MTSS1,NUAK1,OLFML2B,PCSK2,PDK4,RGS4,SCG5,SERPINB2,SLC9A9,TAGLN,TMOD1,TSPAN1,UCN3
PHB2	-0.477	transcription regulator		-1.026	0.0436	AREG,ATF3,CDKN1C,GJA1,IL6,PGR,SOCS3
FOXO3	-0.845	transcription regulator		-1.038	2.17e-14	ACAN,ACLY,ACTA2,ADAMTS13,ANGPT1,ANGPT2,ANXA1,APLN,ASS1,ASTN2,BCL10,BNIP3,C1QA,CCN1,CCN2,CD44,CDH1,CDH5,CDKN1A,CDKN1C,CFLAR,CH25H,CLDN1,COL4A1,COL4A2,EDNRB,EGR1,EGR2,EGR4,ELOVL5,ENPEP,ERG,FABP4,FABP5,FAIM2,FASLG,FLNB,FMOD,FOS,GABARAPL1,GADD45B,GATA2,GRB14,GULP1,HGF,HMGCR,HTATIP2,IGF1R,IL1R1,IL6,INHBA,ITGB2,KLF4,LCP2,LDHD,LRAT,LRIG3,MEF2C,MET,MEX3A,MMP9,MRAP2,MXD4,MYC,MYOD1,NDRG1,NOS3,NTN4,PAK1,PDK…	1147 (20)
SOX1	-0.58	transcription regulator		-1.043	5.66e-07	ANGPT1,APCDD1,CYP26A1,DUSP1,DUSP4,DUSP5,EFEMP1,EOMES,EPHA2,FABP1,GDF3,HAND1,IER5,INHBA,PDLIM3,SOX17,TBXT,TEAD1,TGFB2,TNFRSF19,TWIST2,VEGFA,WNT5A
SOX3		transcription regulator		-1.043	6.7e-07	ANGPT1,APCDD1,CYP26A1,DUSP1,DUSP4,DUSP5,EFEMP1,EOMES,EPHA2,FABP1,GDF3,HAND1,IER5,INHBA,PDLIM3,SOX17,SOX9,TBXT,TEAD1,TGFB2,TNFRSF19,TWIST2,VEGFA,WNT5A
MDM4	0.692	transcription regulator		-1.053	0.0109	AXIN2,CDKN1A,FAT3,KIF23,LGALS3,PIK3IP1,PTCHD4,VIM,WNT7A,WNT7B
EOMES	3.95	transcription regulator		-1.058	1.33e-09	ACTA2,ACTC1,ANXA1,APLNR,CCK,CDH8,CEMIP,CEMIP2,CRYM,CYP26A1,DIPK2A,DUSP4,EGFLAM,EOMES,FASLG,FAT3,FREM1,FZD8,GRP,IL2RB,ITGA2,MAP2K6,MEOX1,MMP17,NHLH1,PCDH19,PDPN,PITX1,PREX1,RGS2,RND3,SOX17,SV2B,TBXT,TGFBI
H2AX	0.089	transcription regulator		-1.067	0.00109	ACTB,ANGPT1,CDKN1A,MLH1,MYC,PLEKHA6,PPARGC1A,PPARGC1B,PTN,SFRP2,SFRP5,TIMP3,VEGFA	1162 (26)
JMY	1.989	transcription regulator		-1.067	0.023	CDH1,GADD45B,HTRA1,MLH1,RRM2B
TLX3		transcription regulator		-1.091	0.00179	ASCL1,CCK,GABRB2,GRIA3,SLC17A6,TAC1,VIP
TBXT	1.927	transcription regulator		-1.096	0.000776	ACAN,CD44,DUSP6,DUSP8,FMOD,MGP,NOTO,SOX6,SOX9,TBXT,XCL1
LHX1		transcription regulator		-1.119	1.48e-06	AADAT,ALDOB,ANGPT1,ASS1,CADPS2,CALCA,CYB561,DAB1,DPP4,EHD2,FABP3,FBP1,FN1,FZD8,HHEX,KL,LRP2,MMP1,MMP9,PAH,PCDH19,PDPN,PRXL2A,SEMA6D,SFRP1,SLC16A12,SLC16A13,SOX17,SPP2,TWIST1,ZDHHC21
IKZF1	-2.289	transcription regulator		-1.132	4e-08	ANTXR1,BAK1,BCL2L1,C1QTNF1,CAV2,CD34,CD79B,CDH22,CDK6,CDKN1A,CEMIP2,CISH,CSF1,CSF3,DNM3,DOK4,DUSP5,EIF2AK3,EMP1,EXTL2,FASLG,FGF13,FGFR4,FN1,FOS,GATA2,GP9,HBZ,HHATL,HK2,IKZF1,IL2RB,IL6,IRF4,ITGA5,JUP,KIF23,KIT,KLF4,LHFPL2,LMO2,MAP2,MCL1,MYC,MYO1B,NGFR,NLRP3,OTUD1,RAI14,RAPGEF4,RHCE,RUNX1,RUNX2,SH3BP5,SHROOM3,SOX9,SPI1,TDO2,THY1,UACA,VIPR1,VWF	1015 (15)
OLIG2		transcription regulator		-1.134	0.027	AXIN2,LRP6,MYC,WNT16,WNT5A,WNT5B,WNT7A
LEF1	-0.487	transcription regulator		-1.159	1.14e-10	ACAN,ACTA2,ACTG2,ADIPOQ,ANXA1,ARHGDIB,ARHGEF26,ARRDC4,AXIN2,BLK,CACNA1G,CAPN3,CCDC3,CCN4,CD44,CD79B,CDH1,CDKN1A,CDKN1C,COL9A1,DGKH,DLX3,DNASE1L3,ECM1,EMILIN2,FAS,FASLG,FGF10,FN1,G0S2,HAS2,IGF1R,IL12RB2,IL6,INPP5F,ITGB8,JUN,KCNJ3,KIAA1958,LAMC1,LFNG,LONRF1,MYC,MYZAP,NLRP3,NR0B1,NTN4,PDGFB,PENK,PHLDA1,PIK3R6,PIP5K1B,PKIB,PLA2G7,PLCD4,PLCXD1,PRG4,PTGS2,PTPRO,RASGEF1B,RASGRP3,RBPMS,RUNX2,SH3GL3,SLC41…	1060 (25)
NRL		transcription regulator		-1.163	0.0295	CRYZ,DGKD,GRB14,GUCA1B,IGF1R,MEF2C,OLFM1,PDE6H,SRC,TUB
GATA2	2.666	transcription regulator		-1.164	1.56e-09	ALOX5,ANGPT1,ANGPT2,AQP9,C1QC,CALCA,CCN3,CCNJL,CCR2,CD34,CD36,CDH5,CDK6,CDKN1A,CELA2A,CHGA,CHST13,COL17A1,CSF1,CSF1R,CX3CL1,DMBT1,DUSP15,EDN1,EDNRA,EPHA3,ERG,F13A1,FABP4,FAT1,GATA2,GBX2,GFRA1,GP9,GREM1,GRTP1,HBZ,HHEX,HMGA2,HSD17B1,IKZF1,IL16,IL2RB,IL6,INKA2,ITGA2,KIT,KLF2,KLF4,KRT13,LMO2,MAFB,MAOB,MCTP1,MEF2C,MGST1,MYB,MYC,NOS3,NPPA,OLFM4,PGR,PLK2,PPARG,PRSS57,RAB44,RCAN1,RGS18,RHAG,RHCE,RUNX1,SE…	1098 (21)
LDB1	0.268	transcription regulator		-1.169	2.47e-09	ACOX2,ACTB,ADGRL2,ADRA2C,ANGPT1,ANXA1,AXIN2,BTK,CARMIL1,CCR2,CD247,CD34,CD79B,CDH5,CDKN1A,CLIC3,COMT,DPP4,DUSP15,FBP1,FNDC3B,GJA1,GRB10,GSDME,GSN,HHEX,IL1RAP,KCTD17,KIT,KLF11,LHFPL2,LMCD1,LMO2,MAP3K5,MEF2C,NDRG1,PCBP3,PDZD2,PISD,PSTPIP1,RAB11FIP4,RAB32,RAPGEF5,RASGRP1,RIPK2,RPL3L,RPS6KL1,SCARB2,SERPINF1,SFRP1,SFRP2,SKI,SLC25A47,SLIT1,SPI1,SPRED1,SPRY2,TAL1,TAMALIN,TBKBP1,TES,TGFB1,TGFB2,THY1,TLR2…
GFI1		transcription regulator		-1.182	2.19e-05	BAK1,BCL2L1,CCR7,CDKN1A,CELA2A,CFLAR,CSF1,EGR2,ENTPD1,FOSL2,GJA1,GKN2,IL1R1,IL6,ISL1,ITGB3,JUN,KLF2,LPAR1,MAFB,MAFF,MAP3K5,MYC,NFKB1,RAPGEF4,RASGRP1,RASL11B,RIPK2,SESN3,STAT4,TESC,TNK2,TRAF3,TRAF5	591 (15)
HDAC3	-0.422	transcription regulator		-1.184	5.74e-07	ACACB,ACAN,ALOX5,CD34,CD36,CD55,CD82,CDH1,CDKN1A,DIO1,ELOVL5,FOS,FOXL2,HBE1,HK2,IBSP,IL12B,IL6,JUP,MMP9,MYC,NOS3,PTGS2,RARB,SLC1A2,SMAD7,SPP1,TAGLN,TBX1,TBX5,TNNI2,VIM	900 (18)
BTG2	2.044	transcription regulator		-1.185	0.000575	ACTA2,BTG2,CDH1,DIAPH2,FN1,IGFBP2,IGFBP4,IL6,MMP1,NOX4,RARB,TIMP2,VIM	1031 (21)
NKX2-1		transcription regulator		-1.197	1.01e-08	AGR2,AGTR2,AREG,CA4,CKS1B,CNMD,COL9A1,CYGB,DPP4,ENC1,EPHB1,ESAM,FGFR4,FSHR,GJB3,GNRH1,HMGA2,LMO3,LRP2,MTF1,MTUS1,MYB,PARD6B,PDPN,PLP1,POLG,QSOX1,ROS1,SCARA3,SCNN1G,SLC34A2,SLC6A14,SMAD7,SOX17,TG,TGFB1,TGFB2,THBS1,THY1,TNC,TP63,TSPAN7,UGT8,VEGFA,WNT5B,WNT7B	594 (8)
ETV3	1.044	transcription regulator		-1.212	0.0022	HELZ2,IFI35,IRF9,LY6E,MMP1,MX1,MYB,MYC,OASL,PARP9,PLSCR1,SHISA5,SPP1,XCL1	142 (3)
NCOR2	0.571	transcription regulator		-1.213	1.28e-11	ABCB11,ACADL,ACADSB,ADIPOQ,AQP3,ATP1A1,AXIN2,C1QA,C3,CCN2,CDKN1A,CTSS,CYP3A4,DIO1,FGF2,FOS,HBEGF,HPGDS,IKZF1,IL12B,IL6,JUN,KLF2,LPL,MYC,PDGFA,PDGFB,PGR,PIM1,PPARG,PPARGC1A,PTGS2,RARB,SEMA4D,TGFB1,TGFB2,TGFB3	1219 (24)
MTA3	-0.401	transcription regulator		-1.214	0.0066	ACTA2,ACTC1,BCAS3,CD79B,FN1,MYC,SDC1,TGFB1
KLF9	-0.298	transcription regulator		-1.217	0.027	ACP5,CDH1,DIO1,KRT14,PGR,TGFB1,VIM
TFAP2C	2.188	transcription regulator		-1.22	0.00736	CCN2,CD44,CDH1,CDKN1A,EGR3,EOMES,FMN1,FREM2,FST,HOXA1,MAL,MMP9,MYC,TFAP2C,TGFA,THBS1	1041 (19)
GMNN	-0.975	transcription regulator		-1.225	8.88e-08	ANGPT1,APCDD1,CDH1,CDKN1A,CYP26A1,DUSP1,DUSP4,DUSP5,EFEMP1,EOMES,EPHA2,FABP1,FGF2,GDF3,HAND1,IER5,INHBA,PDLIM3,SOX17,TBXT,TEAD1,TGFB2,TNFRSF19,TWIST2,VEGFA,WNT5A	961 (17)
ZBTB18	0.448	transcription regulator		-1.226	0.000257	C1QTNF1,CAPN6,CHSY3,COL4A1,DUSP10,FST,LAMC2,MET,PIK3R6,ZYX	419 (7)
GPS2	-0.346	transcription regulator		-1.262	0.000218	BIN1,CDK6,CDKN1A,CLIC3,EVL,FAM20C,HIVEP2,IL12B,IL6,LHPP,MCTP1,MYC,PGR,RHOB,SCIN,SHISA5,SLC39A8,TMSB4X,VCAM1	1128 (25)
ASXL1	0.458	transcription regulator		-1.265	0.00778	CFD,G0S2,HK2,LPL,LRP2BP,PELI2,PPARG,PPARGC1B,RARB,VEGFA	432 (7)
TAL1	1.308	transcription regulator		-1.272	0.000348	ACP5,ADCY3,ATP6AP1L,C3,CACNG4,CDH5,CDK6,CDKN1A,CHST11,CMTR2,DSG2,ERG,FBN1,GATA2,GUCY1A1,IL31RA,JUN,KIT,LCORL,LMO1,MAP2,MAP3K4,MCTP1,MYB,MYC,MYO1E,NFKB1,NOS1,NR4A3,NTNG2,RAPGEF5,RASD1,RUNX1,SERPINB2,SOX4,SPI1,SPRY2,TRAF3,TSPAN7,ZBTB21	604 (16)
ASCL1	-4.07	transcription regulator		-1.28	1.61e-05	CDK5R1,CDKN1A,CDKN1C,CPLX2,DCX,DIO3,DLX2,DLX5,EPHA2,HEY2,IKZF1,ISL1,LAMP5,NFASC,NPY,PAH,PCSK6,PLCXD3,PLXNA2,PROX1,RORB,S100A10,SEZ6L,SNAP25,SOX9,SYT6,TEAD1,ZMAT4
NEUROG1		transcription regulator		-1.3	7.57e-13	ASS1,C1S,C3,CD82,CDK5R1,CEMIP,DCX,FABP3,FAP,FN1,GASK1B,GFPT2,GREM1,HAS2,IL6,INHBA,ITGB3,LCP1,MMP9,NOG,P4HA2,PLK2,PPIC,SCG2,SERPINF1,TACR1,THBS1,TMEFF2,TSPAN7	435 (7)
SATB2	0.897	transcription regulator		-1.311	0.00108	AUTS2,CDH3,CX3CL1,EFEMP1,ESAM,FABP4,FLVCR2,HBE1,ITGA8,MFAP2,NOX4,PLXNA2,SDC2,SPP1
ZNF148	0.437	transcription regulator		-1.324	0.0125	BAK1,BCL2L1,CDKN1A,DEPTOR,FN1,STMN3,VIM
HOXC9		transcription regulator		-1.342	0.00672	FGF10,MMP9,NOS3,SPP1,TIMP3,WNT5A
CCNH	-0.248	transcription regulator		-1.342	0.0365	CDKN1A,FGF19,HAND1,MKX,MSX1
KMT2D	0.564	transcription regulator		-1.383	3.51e-06	ADCY5,ARHGAP29,CA10,CA4,CD55,CDH1,CRIP1,CSPG4,CTSD,ECI2,EGR3,FABP3,FBXL7,GABRG3,GLYCTK,GPRC5C,GRHL3,HFM1,HOPX,INHBA,IRF6,IRF9,KLF4,KRT17,KRT23,LAMB3,LDAF1,MAVS,MEOX1,MMP9,MX1,MYOM3,NGFR,NPR3,NR4A1,NUDT14,PPARG,PPIC,PPP2R2B,PRIMPOL,PTGR1,PTGR2,SLC1A6,SORD,STEAP1,STING1,SYDE2,TAPBP,VIM,VSIG8,WTIP,XKRX	1089 (20)
BCL3		transcription regulator		-1.414	0.0247	BCL2L1,CD82,CLDN5,DUSP5,EGR1,EGR2,FABP3,FOS,IL6,JUN,NR4A1,PDK4,S100A12,S100A14,VLDLR
GATAD2B	1.064	transcription regulator		-1.414	0.0334	GSDME,JUND,LSAMP,MEF2C,NFIA,PTGS2,PTN,SLC24A5
SP7		transcription regulator		-1.414	0.0118	ALPL,IBSP,IL6,RUNX2,SOX9,SPP1
RBL1	0.705	transcription regulator		-1.432	0.0106	CDKN1A,CDKN1C,DUSP10,F3,FAS,FGF2,FOS,LHCGR,MCM3,MET,MYC,PPARGC1A,SFRP1,TERT,THBS1
RBCK1		transcription regulator		-1.432	0.0192	ATP1A1,CCN1,CCN2,IL6,MAP2K6,MYC,NFKB1,RIPK2,VCAM1
IKZF3		transcription regulator		-1.44	0.00498	ALOX5,ANTXR1,BCL2L1,CAV2,CEMIP2,DNM3,DOK4,FN1,HHATL,KLF4,LHFPL2,MAP2,MYC,OTUD1,SOX9
OTX2		transcription regulator		-1.453	0.0083	COL8A1,CPXM2,EFNA2,FLVCR2,GBX2,GNRH1,MYOD1,RBP3,SEMA3C,SLC24A5,STRA6,TF,TNC,TTR
RUNX3		transcription regulator		-1.457	4.15e-15	ACAN,AKAP6,CAPN6,CCN1,CCN2,CCR7,CD44,CDKN1A,CFLAR,CHST3,COL12A1,COL4A1,COL4A4,CRIM1,CSF1R,EOMES,FBN1,FGF2,FMN2,GRK5,LOX,MMP9,MYC,NUAK1,PRG4,PTPN21,REEP1,RTN1,RUNX1,SCARA3,SGCD,SPP1,SPRED1,ST3GAL5,STC2,TEAD1,TGFB1,TGFB2,THY1,TIMP2,TLCD4,TOX2,TPM2,VIM,VWF,WNT5A,WT1,XCL1	1139 (22)
MED14	0.076	transcription regulator		-1.477	0.00451	CD36,CIDEC,DUSP1,FABP4,LAD1	714 (8)
CRTC1	0.375	transcription regulator		-1.48	0.000236	BDNF,CPS1,MMP1,NEDD9,NR4A1,NR4A2,PPARGC1A,PTGS2,SIK1	691 (10)
ILF3		transcription regulator		-1.494	0.000109	ALDH1A2,ANXA5,ATF3,CH25H,CHKA,COL14A1,ELF3,FABP5,FADS2,FMN1,FOS,IL6,LGALS3,LPL,MAFB,NFKBIE,PLA2G7,PLAU,PPARG,SCD,STAT4,STEAP4,TNC	865 (17)
ZNF217	0.184	transcription regulator		-1.5	3.05e-07	AGR2,ATP10D,COL8A1,CREB5,DPP6,EOMES,ERBB3,GPRC5A,KCNK2,LMO3,MYC,MYO1B,NMNAT2,NMU,NRK,PKP2,PLAT,RCAN1,RGS20,SHC4,SLC6A15,STRA6,VSNL1,WNT5B	417 (6)
SUPT16H		transcription regulator		-1.508	0.000843	BMP3,C19orf12,CCDC9B,CDKN1A,DUSP5,EGR1,KCNF1,KCNQ5,LOXL2,MLIP,MSN,MYADML2,MYOD1,MYOM2,PDGFA,PLAU,PLXNA2,SAMD12,SCG2,SGCA,SLC1A4,TFPI,TMTC1,TNNI2,VCL
KLF15	0.404	transcription regulator		-1.553	2.86e-08	ACADL,ACTA2,ALDOB,ALPL,CCN2,CD36,CEBPB,CHAC1,CLDN15,CMKLR1,DIO3,EDNRB,EHHADH,FABP3,FABP5,HTR2A,IL6,LUM,MMP9,MYOD1,NGF,NPPA,PDK4,PIM1,PLIN5,PPARG,PPARGC1A,PRODH,SLC27A1,TAGLN,VCAM1,VEGFD	888 (23)
HDAC4	-0.412	transcription regulator		-1.59	1.96e-16	ACTA2,ANGPTL4,ARC,ATF3,BDNF,C1QC,CALCA,CDKN1A,CHRDL1,CSRP3,EGR2,ETNPPL,FGF13,FOS,FST,GABRA4,GABRB2,GABRG3,GPHN,HMGCR,HOMER1,IL6,JUN,KLF2,LGI1,MEF2C,MMP9,MYLK2,MYOM2,MYOZ1,NBEA,NECAB1,NEDD9,NR4A1,NR4A2,PPM1E,PRKCB,PTGS2,RGS2,RGS4,RGS7,RTN1,RUNX2,SERPINB2,SNAP25,SOX9,SYN2,TAGLN,TERT,TNFRSF11B,TSPAN13,TSPAN7,VCAM1,VEGFA	734 (21)
NFIL3	0.754	transcription regulator		-1.619	0.00814	BATF3,CD36,CDKN1A,EOMES,FAS,GADD45B,IL12B,IL9,PTGS2	1157 (24)
HLX	0.458	transcription regulator		-1.633	5.12e-05	ANKRD1,AREG,CD34,CD44,CDKN1C,CLDN1,CTSS,EGR1,GDF15,JUN,MYC,THY1	692 (7)
KLF10	0.496	transcription regulator		-1.638	0.00439	CD44,CDKN1A,EPCAM,IL12B,MET,MMP9,PPARG,SMAD7,TGFB1	1143 (22)
SOX10		transcription regulator		-1.638	3.87e-05	ACKR3,CDKN1A,EDNRB,EGR2,ERBB3,FN1,FOS,GAS7,IRF4,ITGA6,MYC,NGFR,PLP1,PTN,SOD3,SOX8,SOX9	843 (16)
MED16	-0.73	transcription regulator		-1.662	8.65e-06	ANGPTL4,CCN1,CCN2,CDH1,MMP1,MMP9,TAGLN,VIM	790 (13)
TFAM	-0.358	transcription regulator		-1.671	0.00182	ABLIM3,ACADL,ALDH18A1,AREG,ASNS,CDH1,CHAC1,CHRNA4,CTH,FABP3,FABP4,FABP5,GARS1,GDPD5,GLCE,GNAT3,ITGA5,MUC2,NXNL2,PSAT1,PSD2,RLN3,RUNX2,SLC7A1,SLC7A3,SLC7A5,TNS4,VIM,ZDHHC2	929 (22)
SIRT1	-0.881	transcription regulator		-1.676	1.55e-10	ABCB1,ACADL,ACAN,ACAP1,ACOX3,ACTA2,ACTB,ADIPOQ,APLN,AQP11,ATP2A3,BCL2L1,BDNF,BNIP3,CD36,CD79B,CDH1,CDKN1A,CEBPB,CFLAR,CMPK2,CYP1A1,EIF2AK3,ENTPD8,ERO1A,EVPL,FABP4,FAS,FGF10,FN1,GABARAPL1,GFPT1,GK2,HELZ2,HGF,HK2,HMGCR,HSPA4,IGF1R,IL12B,IL2RG,IL6,ITPKA,KALRN,KIF1A,KIF5C,KLF2,LAMA4,LAPTM5,LGALS3,LMTK2,LY6E,MAF,MAOA,MCL1,MEF2C,MLH1,MMP1,MMP9,MYC,NELL2,NFKBIE,NOS3,NPY,PCSK2,PDK4,PHKB,PLEKHA6,PNPLA3,PP…	896 (17)
VHL	0.388	transcription regulator		-1.727	1.51e-11	ACLY,AKT3,ARPC1A,BAK1,BCL2L1,BHLHE40,BICD2,BNIP3,C1QA,C1QB,C1QC,CA9,CCN2,CDCP1,CDH1,CDKN1A,CDKN1C,CTSD,CYBRD1,EHHADH,F3,FILIP1L,FN1,GLCE,GNG4,HK2,HSD17B1,IGF1R,IL6,ITGA5,LOX,LOXL2,MAF,MAPK13,MAVS,NEDD9,NFKB1,NFKBIE,NOX4,PDGFB,PFKFB3,PISD,PTHLH,RUNX1,SFMBT1,SLC16A3,SLC1A3,SMAD7,SPP1,TAGLN,TGFA,VCAM1,VEGFA,VIM	1017 (21)
HDAC5		transcription regulator		-1.732	1.93e-06	ACADL,ACTA2,ARC,CDKN1A,DAPK1,EGR2,ETNPPL,HK2,HMGCR,JUN,KLF2,KLF6,LPL,MEF2C,MYC,MYH7,NPPA,NR4A1,PPARG,PPARGC1A,RUNX2,SMAD7,TAGLN,TWIST1,USP28	1020 (22)
PAX5		transcription regulator		-1.744	0.00313	BCL2L1,BIK,BLK,BTK,CD79B,CSF1R,ENPEP,FN1,GRHL3,HK2,LCP2,MET,MGST1,MSN,MYC,NEDD9,PLXDC1,SDC1,STEAP1,VIM	1006 (22)
EBF2	0.255	transcription regulator		-1.767	0.0024	ADAMTS15,ADCY3,CIDEA,CNGA2,ENTPD2,LGI1,LGI2,MEOX1
FOXA1	0.71	transcription regulator		-1.787	7.46e-14	ACKR3,ACTA2,ACTC1,ACTG2,AGR2,ANXA1,AQP3,BARX2,BHLHE40,CDH1,CDKN1A,CPS1,DCX,DPYSL4,DSE,DUSP1,EDN2,ELK3,EPB41L3,ERBB3,ERO1A,FMN1,FNDC3B,FOSL2,GFRA4,HK2,HS3ST1,IL6,ISL1,JUN,LAMB3,LAMC1,LAMC2,MGP,MUC2,MYC,MYH9,NOTO,NPTX2,NPY,NR4A2,P4HA2,PAM,PFKFB3,PGR,PISD,PPP1R14C,PTPN14,RASSF1,SDC2,SDC4,SELENBP1,SIAH2,SLC6A15,SOX9,TAGLN,TAGLN2,TF,TGFB3,TMEM74,TMPRSS2,TPM2,TRIM2,TTR,VEGFA,VLDLR,WNT7B	1132 (20)
CITED2	0.377	transcription regulator		-1.81	3.94e-09	ADAP2,AIG1,ANGPTL4,ARL4A,ASAP3,C3,CLIC5,CMPK2,CRIM1,CYRIA,DNASE1L3,DUSP1,ENDOD1,ENTPD1,F3,FLT1,FMNL2,GADD45B,HOPX,IFI35,IFRD1,IL12B,IL6,IRF9,KIF5C,KLF6,LCP2,LPL,MMP1,OTUD1,PARP9,PDE7B,PDGFC,PFKFB3,PIM1,PLAU,RIPK2,SAT1,SEMA3C,SERPINB2,SLAMF8,SLC1A3,SLC38A2,TAGAP,TBXT,TGM2,TLR7,TMEM140,TMEM67,TNFSF15,UPP1,VEGFA,VEGFD	879 (14)
OVOL2		transcription regulator		-1.821	0.393	ARPC1B,CDKN1A,EFNB2,HK2,NR2F1,VIM
IKZF2	0.025	transcription regulator		-1.89	0.074	BATF,CD2,IL1R1,IRF4,NR4A1,STAT4,TNFRSF9
HOXB13		transcription regulator		-1.89	0.0226	ATP10D,BCHE,CDKN1A,CEP170,LRRN1,MYC,POPDC3
TCF7	0.794	transcription regulator		-1.901	9.91e-12	ANXA1,ARHGDIB,ARHGEF26,ARRDC4,AXIN2,BACH1,BATF,BLK,CAPN3,CCDC3,CCR2,CD79B,CDH1,CDKN1A,CDKN1C,CISH,DGKH,DNASE1L3,ECM1,EGR2,EGR3,ELK3,EMILIN2,EOMES,FASLG,FOS,G0S2,HSD17B11,IGF1R,IL12RB2,IL1R1,IL2RB,IL6,INPP5D,INPP5F,IRF4,ITGB8,JUN,KCNJ3,KIAA1958,KIT,KLF6,LAMC1,LONRF1,LPCAT2,MAF,MET,MMP9,MSMO1,MYD88,MYZAP,NFKB1,NTN4,OSBPL3,PDGFB,PENK,PHLDA1,PIK3R6,PIP5K1B,PKIB,PLA2G7,PLCD4,PLCXD1,PPARG,PRG4,PRKCB,PR…	1143 (26)
TCF7L1	1.024	transcription regulator		-1.906	2.53e-06	ARHGDIB,ARHGEF26,ATF3,AXIN2,CCDC3,CDKN1C,COL4A1,COL4A2,DPP4,EOMES,ESRRB,FN1,GBX2,JUN,KCNJ3,KIT,KLF2,KLF4,NR0B1,PLCXD1,PPARG,SLC26A2,SOX17,TBX3,TFCP2L1,TNFRSF19	1027 (19)
SCX	2.655	transcription regulator		-1.941	0.000651	ACAN,MSX1,SCX,SOX9,SPP1,TBX20,TIMP3,TNC
HESX1	-0.548	transcription regulator		-1.941	0.000451	AXIN2,GATA2,MYB,RUNX1,TBXT
CIC		transcription regulator		-1.947	0.000291	DUSP4,ETV4,ITGA2,MAFF,MMP24,SLC1A4,SLC20A1,SPRY4
HIF3A		transcription regulator		-1.953	0.0572	APLN,EDN1,RARB,VEGFA
CTBP2	0.691	transcription regulator		-1.964	0.0375	CDH1,CDH5,EOMES,HMGCR,JUP,LMO3,SPRY4
CIITA		transcription regulator		-1.974	1	FASLG,FN1,MMP9,TGFB1
TAF4	0.279	transcription regulator		-1.982	1.46e-13	AREG,BCL2L1,BDNF,CARMIL1,CCN2,CDH1,CDH3,CLDN1,DCN,DLX2,FMOD,GREM1,HBEGF,HOPX,ITGA6,KLF4,KLF5,LRRC15,LUM,MAFF,MAFK,MAP4K4,PDGFA,PDGFC,PENK,PPARGC1A,PTN,RUNX1,SCUBE1,SFRP2,SPP1,TGFB1,TGFB3,THBS1,THBS2,VAV3,VEGFD	540 (7)
ZBTB16		transcription regulator		-1.99	0.000116	AGPAT4,BACH2,CCR2,CD2,CD34,CD44,CD55,CDKN1A,CSGALNACT1,EGR2,EYA2,F13A1,F2RL1,FABP7,FASLG,FLT1,GGT7,GP9,GPT2,IL12B,IL6,IRF6,ITGAV,ITGB3,KCNJ8,KIT,KLF2,LY86,LY96,MAF,MMP9,MYC,PDGFB,PIK3CB,PIK3R3,PTGS2,RARG,RUNX2,SPP1,TNFRSF4,UCK2	1067 (22)
WDR77	0.967	transcription regulator	Inhibited	-2	0.407	CSF3,DMBT1,IL6,TGFB1
FOXF2		transcription regulator	Inhibited	-2.006	3.06e-05	ACTA2,ACTG2,CDH1,CDK6,CDKN1A,FN1,PDGFA,PDGFB,TAGLN,VIM,WNT5A	996 (21)
SPDEF		transcription regulator	Inhibited	-2.084	2.93e-06	AGR2,APC,CCN2,CD34,CDKN1A,COL13A1,COL16A1,COL4A1,COL4A2,FZD8,ITGA5,ITGA6,LAMC1,LASP1,PLAU,SDC1,SDC2,SOX17,TGFB1,TNC,VIM,WNT5A	1004 (22)
SMAD5	-0.36	transcription regulator	Inhibited	-2.105	8.99e-07	ALPL,CCN2,COCH,CSF1,DLX3,GATA2,GDNF,PDGFA,PDGFB,RUNX1,RUNX2,SELE,VCAM1,VEGFA	1026 (23)
HIVEP1	0.624	transcription regulator	Inhibited	-2.111	0.0201	IL1R1,IL6,LY96,MAPK13,MRAS,MYD88,NFKB1,NFKBIE,PIK3R6,RRAS,TGFA
RBPJ	0.284	transcription regulator	Inhibited	-2.127	3.56e-12	ACTA2,ALDH1A2,APLN,ASCL1,AXIN2,BMP3,BTG2,CCR7,CD44,CDKN1A,CDKN1C,CSF1,CSF3,DUSP1,EFNB2,EMILIN2,FADS2,FGF1,FGF10,FGF13,FGF2,FOS,GDNF,GNAI1,HAS2,HEY2,HGF,HOXD3,HSD17B7,IL15,IL16,IL6,IL9,INHA,INHBA,INHBB,IRF5,JUN,LFNG,LIF,MIB2,MUC2,MYC,NFKB1,NGF,NHLH1,NR4A1,P2RY6,PDGFB,PGF,RAD51AP1,SDC1,SLAMF8,SOX4,SOX9,SPATA13,SPP1,STK39,TGFB2,TGFB3,TNC,TPPP3,TWIST1,VEGFA,VEGFD,WNT5A	983 (20)
TCOF1	0.423	transcription regulator	Inhibited	-2.128	0.00103	AKR1B1,AMHR2,ANXA2,BNIP3,BPHL,CNBP,COL8A1,FABP3,FZD8,GRHPR,HACD4,KIF26B,KIT,MEOX1,NCALD,NDRG1,NUDT14,PPP4R4,PPRC1,STMN3,TMEM100
RAD21	-0.242	transcription regulator	Inhibited	-2.159	0.0228	BDNF,CLMP,FAT1,GABRG3,ITGA5,KLF5,MYC,SOX4,TGFB1,THBS1,VIM
MYCN	1.189	transcription regulator	Inhibited	-2.192	3.27e-06	ABCA2,ABCB1,ACTB,ACTN4,ADAM12,AMOTL2,ARPC1B,BASP1,BCL2L1,CCN2,CDH5,CDKN1A,COL4A1,COL8A1,CRIM1,DIRAS1,DPYSL3,DUSP1,DUSP4,EMP1,FASLG,FBN1,FN1,GATA2,GBX2,HK2,HMGA1,INHBA,ITGA2,ITGB1,LIF,LPAR1,LRRN1,MYH9,MYL12A,MYOM3,NDRG1,NGFR,PDLIM1,PRKN,PTPRO,RCAN2,RGS5,RND3,RUSC2,S100A10,SDC2,SLC1A2,SLC25A19,SLC38A2,SORD,SOX17,SV2A,TAGLN,TBXT,TERT,TGIF1,TGM2,TIMP2,TMPRSS2,TNFRSF10B,TPM1,VIM,ZFAND5,ZYX	1041 (21)
ZFP91	-0.407	transcription regulator	Inhibited	-2.236	0.0177	BCAT1,CRABP2,FADS2,HK2,TNFRSF8
BCL6	0.661	transcription regulator	Inhibited	-2.243	5.27e-07	A2M,ACAN,ATP2A2,BACH2,BCL2L1,C1QTNF12,CCDC122,CCR7,CD2,CD44,CD79B,CDKN1A,CHM,CISH,CSF1,CUX2,DUSP6,EGR3,EHHADH,ENTPD1,FAS,FGF2,FMOD,GABARAPL1,IL12B,IL2RB,IL6,IL9,IRF4,IRF9,JMY,KCNG4,KLF6,LBH,MAF,MGP,MYB,MYC,NFKB1,PDIA2,PFKM,PTPRO,RGS4,RWDD3,SDC1,SLC39A8,SOCS3,SOX6,SOX9,TBXT,TGFB1,TPM3,TRIM2	935 (17)
NOSTRIN		transcription regulator	Inhibited	-2.336	1.44e-09	ACE,ANXA5,FGF1,FLT1,FN1,IL6,ITGA5,ITGB3,KIT,MMP9,NFKB1,NOS3,PGF,PLAU,SELE,TFPI,THBS1	761 (14)
ZNF750		transcription regulator	Inhibited	-2.373	0.00267	CTNNAL1,IFI35,IL12B,IL15,IL6,IRF4,IRF5,IRF6,LAMB3,LAMC2,MX1,OASL,PLSCR1,RIPK3,SAMHD1,TINCR,TLR2	751 (12)
SIAH2	1.232	transcription regulator	Inhibited	-2.408	9.07e-10	ANGPT1,ANXA2,ARG2,C3,CCL17,CD36,CEBPB,CTSD,CYP24A1,FABP4,FGF1,LGALS3,MARCO,MEOX1,MX1,PLA2G7,PLK3,SDC4,SIAH2,SOCS3,SPP1,THBS1,TREM2,VEGFA,VIM	1141 (22)
NAB2	0.841	transcription regulator	Inhibited	-2.418	7.73e-06	ALOX5AP,CDKN1A,F3,FGF2,FLT1,FN1,FOS,PLAU,PPARG,TGFB1	764 (16)
KLF2	3.051	transcription regulator	Inhibited	-2.419	3.09e-17	ACE,ACKR3,ANGPT2,APLN,APLNR,ASS1,CCL4,CCN2,CCR7,CD36,CD55,CDH1,CDKN1A,CNP,COL4A1,CRABP2,DOCK2,ECM1,EDN1,F3,FABP4,FLT1,HBE1,HMGCR,HMGCS1,IL6,ITGB3,LBP,MAP3K5,MSMO1,MYC,NDRG1,NOS3,PDPN,PGF,PLOD2,PPARG,PTGDS,PTGS2,PTHLH,RGS3,RUNX2,SEMA3F,SMURF2,SOX9,SREBF1,TBX5,TERT,TFPI,TGFB1,TGFB2,THBS1,TNFRSF8,TWIST1,VAV1,VCAM1,VIM,VWF,WEE1	908 (18)
ZBTB48	0.056	transcription regulator	Inhibited	-2.433	0.229	ACKR3,MCF2,MSS51,ROS1,SPP1,TMEM100
ZFHX3	0.072	transcription regulator	Inhibited	-2.534	9.91e-06	APOA1,C1QL1,DRD1,EPCAM,F2RL1,HCN1,KRT7,LRRC17,MX1,MYH7,MYOD1,NGFR,PLA2G7,PROK2,RASL11B,RGS2,RORB,RYR3,SCN4B,SFRP5,SLC10A4,TAC1,TUBA1A,VIM,VIP,VIPR2,WNT5A	610 (7)
EED	0.712	transcription regulator	Inhibited	-2.646	5.12e-05	BDNF,GDNF,HMGA2,IGFBP2,KLF4,MYC,PPP2R2B,PTGS2,RUNX2,SCIN,TBX3,TBX5,TBXT,THY1	975 (22)
SALL4	-0.406	transcription regulator	Inhibited	-2.73	9.47e-12	ACTB,ALOX5AP,ANGPTL4,ANXA2,BTG2,CAV2,CCL4,CCN1,CCN5,CD44,CFL2,COL13A1,DNM3,EFNB2,EPCAM,EPHA2,FGF1,FLT1,FN1,FYB1,GJA5,HMGA2,ITGA6,ITGAV,ITGB1,ITGB8,JUN,LASP1,LCP2,LOXL2,LRP2,MMP1,NGFR,PDGFC,PRKAR2B,RARB,RND3,SDC2,SEMA3C,SEMA3D,SFRP1,SMURF1,TGFA,TPM1,VAV3,VCL,VEGFA,VIM,WNK4,WNT5A	903 (17)
ETV5	-0.348	transcription regulator	Inhibited	-2.835	3.24e-09	AKAP5,BAK1,CDH1,CDKN1A,CLDN1,CLIC5,COL4A3,CSF3,FN1,GCH1,HOPX,IL6,IL9,ITGA5,ITGB1,KRT13,KRT23,KRT7,LCP2,LGALS3,LMO7,MAF,MET,MSN,MYB,PKP2,S100A14,S100A6,SAMHD1,SLC34A2,SPP1,TIMP3,TINAGL1,TJP2,TWIST1,VEGFA	727 (19)
HNF4A		transcription regulator	Inhibited	-2.842	1.67e-06	AAMDC,ABCB11,ABHD10,ABHD6,ACLY,ACOX2,ACOX3,ACSS3,ACTA2,ACTN1,ADPRH,ADPRHL1,AGA,AGTPBP1,AKR1B1,ALDOB,AMIGO3,ANXA5,APOA1,AQP3,AQP9,ARG2,ARL6,AS3MT,ASCL1,ASNS,ATF3,ATP10A,AVPI1,AXIN2,BAZ1A,BCL2L1,BMP5,BNC1,BPHL,C1S,C22orf23,C3,CACNA2D2,CAP1,CAPN2,CBR3,CBS,CCDC82,CD36,CD55,CDH1,CDHR1,CDKN1A,CDKN1C,CDR2,CEBPB,CEP19,CFL2,CHAC1,CHD1L,CHRNB2,CIDEC,CLDN1,CLXN,CLYBL,CNBP,CNN2,CNN3,COQ10B,CPED1,CRABP2,CREBL…	1177 (24)
GLI1	0.065	transcription regulator	Inhibited	-2.879	1.76e-34	ACTA2,ALOX5,ANXA1,ARC,ARHGAP28,ARHGAP29,ATF3,BAK1,BCL2L1,BNC1,CADPS,CAV2,CCL26,CCN1,CCSAP,CD44,CDH1,CDK6,CDKN1A,CFL2,CHST13,CLIC5,CMPK2,CSF1,CSRNP1,DIRAS2,DUSP4,DUSP5,DUSP6,EFHD2,EGR1,EGR3,EMP1,ENDOD1,EPB41L4B,EPS8L3,EZR,FAS,FASLG,FGF1,FGF10,FOLH1,FOS,GADD45B,GJA3,GPRC5A,GREM2,GRIA3,HEY2,HIVEP2,HOXB5,IBSP,IGF1R,IL17RD,IL6,INSIG1,IQGAP3,ITGB6,JUP,KCNJ8,KIT,KLF4,KLF5,KLF6,KRAS,KRT17,LAMB3,LAPTM5,LF…	1019 (22)
PRDM2	0.033	transcription regulator	Inhibited	-3.224	1.84e-06	BCO1,CACNB4,CCDC88A,CHSY3,COL14A1,COL4A1,DNAJB4,DUSP5,FBN1,GJB6,GNAI1,GPRC5C,HMGCS1,HSPG2,IFI35,INHBB,ITGB8,KIAA0513,LDHD,MAP2,MAP2K6,MYBL1,MYC,NAV3,NBEA,NOX1,NUS1,OSBPL6,PELI2,PPP1R14C,RBMS1,SCIN,SGO2,SLC20A1,SLC36A4,SLC39A10,SMARCD3,ST6GALNAC1,TLCD4,TRIB2,TRPS1,VGLL3,ZC2HC1A
PPARGC1A	-1.342	transcription regulator	Inhibited	-3.421	6.43e-14	ABCB11,ACACB,ACADL,ACSL6,ADAMTS2,ADAMTS20,ADIPOQ,BNIP3,C3,CACNA2D2,CCN2,CCN4,CD36,CDKN1A,CEBPB,CIDEA,CKMT2,CPXM1,CXCL14,CYP1A1,CYP2D6,CYP3A4,CYP3A5,DCN,DIO1,DPT,EDN1,EMILIN2,FABP3,FABP4,FAM20A,FAS,FOS,FREM1,GADD45B,GDF15,GFRA1,GJC2,GRIN2C,HK2,IL1RAP,IL6,INHA,INHBA,INHBB,INPP5J,INSIG1,ITGB1,KYAT3,LAMA4,LIF,LPL,LUM,MAL,MAOB,MAP1B,MAP2K6,MB,MCM3,MSMO1,MYC,MYD88,MYH7,NFKB1,NLRP3,NPPA,NR4A1,OGN,OSMR,P…	1075 (17)
HNF4G	0.523	transcription regulator	Inhibited	-3.729	0.000247	ABCB11,CAPN2,CNN2,CNN3,FHOD1,FLNB,ITGA2,ITGA5,ITGAV,LAMB3,LAMC1,LAMC2,PDLIM1,VCL
ARB2A	-0.233	transcription regulator			0.0391	GDNF,SOX9,WT1
Rhox4b (includes others)		transcription regulator			0.0163	CD34,CDH5,TAL1
ZNF91		transcription regulator			0.0391	DDAH1,NEDD9,TGFB3
TLE1	0.016	transcription regulator			0.00155	ATF3,DUSP1,EGR1,FOS,MCL1,ROCK2
RYBP	0.456	transcription regulator			0.000887	ANKRD1,ATF3,CCN2,FAT2,JUN,PPP2R2C,RUNX1,SMAD7,TEAD1,TGFB1,TGFB2,WNT5A,WNT5B	672 (10)
MAGED1		transcription regulator			0.0163	CDKN1A,DLX5,JUN
Tle1		transcription regulator			0.00283	ATF3,DUSP1,EGR1,FOS	691 (7)
IRF2BP1		transcription regulator			0.0192	ATF3,DUSP1,EGR2,EMP1,FOS,IL6,INHBA,SESN3,TNFRSF11B
CCAR1	0.302	transcription regulator			0.0264	FANCA,PPARG,RGS2
ZNF100		transcription regulator			0.0264	DDAH1,NEDD9,TGFB3
ZNF460		transcription regulator			0.0163	MMP9,MYC,NFKB1
ZNF3		transcription regulator			0.0102	MMP1,TWIST1
ZNF85		transcription regulator			0.0264	DDAH1,NEDD9,TGFB3
ZNF254		transcription regulator			0.0264	DDAH1,NEDD9,TGFB3
ATOH7		transcription regulator			0.0088	FGF19,SOX11,SOX4
KLF17		transcription regulator			0.0177	CCL26,CDKN1A,CORIN,FN1,VIM
NFX1	-0.597	transcription regulator			0.00381	HSD17B7,NFKB1,TERT
MTF2	0.228	transcription regulator			0.0088	FOXD3,KLF4,TBX3	708 (16)
THAP11		transcription regulator			0.0132	LCP1,LETM1,LOX,PRKN
ZNF431		transcription regulator			0.0264	DDAH1,NEDD9,TGFB3
ZNF300		transcription regulator			0.0285	IL6,MYC
BATF2		transcription regulator			0.0102	CCN1,JUN
MKX	2.316	transcription regulator			0.0132	MYOD1,SOX6,SOX9,TNMD
TDRD3	0.204	transcription regulator			0.0264	CDH1,VEGFA,VIM
TCF25	-0.1	transcription regulator			0.0285	MYH7,NPPA
HOXD13		transcription regulator			0.00131	ANGPT1,FN1,FOS,HMGA2,LAMC1,NGFR,TNC,TWIST1
OSR2	0.89	transcription regulator			0.0285	OSR1,TGFB3
TRIP13	0.462	transcription regulator			0.0285	CDH1,VIM
RSF1	0.201	transcription regulator			0.0088	BCL2L1,CFLAR,PTGS2
TAF1C	-0.444	transcription regulator			0.0391	IRF6,RCAN1,TFAP4
ZNF467	0.225	transcription regulator			0.0088	CISH,FOS,PPARG
LPXN	-0.657	transcription regulator			0.00381	ACTA2,CIDEC,TAGLN	413 (7)
E2F5	0.478	transcription regulator			0.0415	CDKN1A,DUSP10,MYB,MYC,SERPINB2,TERT
TFEC		transcription regulator			0.00899	F13A1,IGF1R,IL6,LGALS2,MYH9,XCL1
HOXB8		transcription regulator			0.00381	BACH1,MYLK,TAGLN
RBBP7	-0.667	transcription regulator			0.0096	CDH1,GATA2,KIT,MYC,SLC4A1	414 (7)
ELL	0.282	transcription regulator			0.00103	CDKN1A,FOS,MYC	1087 (21)
PURB	-0.043	transcription regulator			0.00103	ACTA2,HTRA1,MYC
POU2F1	0.629	transcription regulator			3.14e-06	A2M,AOX1,CD55,CD79B,CDO1,CSF1R,CYP1A1,ELK3,FRRS1,GNRH1,IL6,ISL1,JUND,LPL,LY6E,NDRG4,NFKB1,NXN,PRKAA2,PTGDS,SAA1,SELE,SESN2,SPP1,TIMP3,TMPRSS2,TNFRSF10B,VCAM1,VIP,VWF	715 (8)
NEUROG2		transcription regulator			0.0117	ALX4,ASCL1,CDK5R1,DCX,DOCK8,HOXA1,IKZF1,NOG,SOX9
SP100		transcription regulator			0.00345	CCN2,CDKN1A,FOS,HSPB8,MMP1,PLAU,THY1	1005 (21)
NR2C1	0.082	transcription regulator			0.0088	CNTFR,HBE1,RARB
NFYB	-0.423	transcription regulator			0.000346	ACLY,ACTA2,ACTB,APC,BCL2L1,CAPN3,CBS,CCNO,CCSAP,CDH1,CLDN15,CNTN4,CPEB3,DNAJB6,DPP4,FAS,FLRT2,GABRA4,GDF6,IBSP,KCTD1,L2HGDH,LRP2,MLH1,MSRA,MTAP,PAQR5,PITPNM3,PTPN6,RHCE,RHOB,RORB,RUNX2,SLC39A8,SNAPC1,SPAG16,ST8SIA4,SYNJ2,TAFA2,TIMP3,TPM1,TTLL9,TWIST1,UHRF1,VIM,VWF
ARID1B	-0.651	transcription regulator			0.00381	ALPL,ARC,FOS
DNMT3L		transcription regulator			0.0264	CDKN1C,CDO1,EPCAM
SMARCA1	-0.631	transcription regulator			0.0391	CDKN1A,MYC,SFN
POU3F3		transcription regulator			0.00862	BSND,CDK5R1,CDK5R2,FABP7
MTA2	0.156	transcription regulator			0.000931	ACTC1,CDKN1A,FSHR,GATA2,JUN,KIT,MYC,SLC4A1,SQLE	923 (18)
ATN1	0.424	transcription regulator			3.77e-08	ARHGEF28,ATP1A1,BASP1,BDNF,BHLHE40,BMP3,CA4,CBLN1,CDH8,CHGB,DPYSL3,EVL,FGF1,GAS7,GRIK1,GRIN2C,GRK5,GSN,HBEGF,JUP,KCNAB2,MOBP,NPTX1,NR2F1,OPRL1,PCTP,PENK,PRKCD,SIK1,SOX11,SOX4,SPP1,ST8SIA5,TM4SF1,VAMP1,VSNL1
SALL1	0.791	transcription regulator			0.0285	TBXT,VEGFA
TFCP2	0.258	transcription regulator			0.0447	A2M,MMP9,SPP1,TGFA,WT1
RBM14	0.147	transcription regulator			0.0191	HK2,HTRA1,MYC,SOX6
FOXO6	0.412	transcription regulator			0.00381	CCR2,MYC,PAK1
GRIP1	-0.461	transcription regulator			0.0052	FRAS1,FREM1,FREM2,PTGS2
AATF	-0.137	transcription regulator			0.0391	CDKN1A,FASLG,JUN
GTF2B	0.502	transcription regulator			0.0433	ACTB,ASNS,CDKN1A,CYP24A1,DIO1,FASLG,LHCGR,PPARG,TERT
ZNF410	0.807	transcription regulator			0.0102	MMP1,SERPINB2
BRCA2	0.152	transcription regulator			0.0391	CDKN1A,HOXB5,STING1
ZNF429		transcription regulator			0.0264	DDAH1,NEDD9,TGFB3
NKX3-1		transcription regulator			0.000115	BTG2,CDH1,ERG,FOS,MMP9,MYC,PIM1,PRKCB,RUNX1,SDC1,SDC4,SOX4,STEAP1,TMPRSS2,TWIST1,VAV3	958 (22)
INVS	0.454	transcription regulator			0.0102	ACTA2,NKX3-2
ANKRD1	10.215	transcription regulator			0.0163	ANKRD1,BCL2L1,NFATC2
FOXE1		transcription regulator			0.0264	TERT,TG,WNT5A
ZNF350		transcription regulator			0.0285	HMGA2,MMP9
BAZ2A	1.247	transcription regulator			3.19e-06	AOX1,FBN1,FHL2,KLF6,LAMB3,MKX,ZNF185
TBP	0.843	transcription regulator			0.00737	ABCB1,ACTB,ASNS,CDKN1A,EDNRA,FASLG,FN1,FOS,HMGCR,IGF1R,MYC,PPARG,PPP2R2B,PTGS2,TGFA	1026 (20)
MLLT3	0.194	transcription regulator			0.0132	EDN1,FBP1,MYC,SCNN1G
SHOX2	-0.158	transcription regulator			0.00283	FGF10,HTRA1,RUNX2,WASF3
HSF4		transcription regulator			0.0455	CRYAB,FGF1,LIF,VIM
SSRP1	0.17	transcription regulator			0.000345	CDKN1A,DUSP5,EGR1,HBE1,LOXL2,MSN,PDGFA,PLAU,TAGLN,TMTC1,TNNI2	383 (7)
YBX3	1.084	transcription regulator			0.0191	ERBB3,JUN,MYC,NCF2
NKX3-2	4.225	transcription regulator			0.0264	FGF10,RUNX2,SOX9
NOCT	0.646	transcription regulator			0.0264	FRRS1L,RORB,TMEFF2
FOXL1		transcription regulator			0.00283	CCN2,MYC,SDC1,WNT5A
BTG1	-1.015	transcription regulator			0.0264	BCL2L1,JUN,PTGS2
HNRNPD	-0.439	transcription regulator			0.00346	CDKN1A,FLT1,FOS,KLF2,PENK,TERT	692 (15)
SNW1	-0.022	transcription regulator			0.0391	CDKN1A,MMP9,PLAU
ZFPM1	-0.684	transcription regulator			0.00075	ALOX5,ALOX5AP,ANXA5,CD82,CEBPB,CNN3,FYB1,GATA2,GP9,GRB10,IL12RB2,IL1R1,IL2RG,IL31RA,KLF6,MFHAS1,SCIN,SPI1	888 (14)
TCL1A		transcription regulator			5.68e-05	ACP5,C1QA,C1QB,C1QC,CELA2A,CTSD,CTSS,FABP7,FOS,GDF15,ITGB2,MAFB,MARCO,MCL1,MMP9,PTPRO,SCARB2,SLC11A1,STEAP4,TLR7,TNFAIP2,TREM2	977 (16)
SMARCD1	-0.079	transcription regulator			0.0052	BTG2,CDKN1A,MMP1,TMPRSS2	880 (7)
NFKBIE	2.141	transcription regulator			0.0132	CSF3,LIF,SELE,VCAM1
CASP8AP2	0.723	transcription regulator			0.0285	CFLAR,MCL1
MTPN	0.984	transcription regulator			0.0391	MYC,NFKB1,NPPA
RCOR2		transcription regulator			0.0132	BDNF,HBE1,INA,SYT4
BRMS1		transcription regulator			0.00862	GJA1,IL6,PLAU,SPP1	667 (13)
FOXP2	-0.919	transcription regulator			0.0132	HGF,HOPX,MET,PDPN
SF1		transcription regulator			0.0391	ACTA2,FN1,VCAM1
RBM39		transcription regulator			0.0226	AKR1B1,ASNS,CTH,GFPT2,HK2,HTRA1,PSAT1
FOXE3		transcription regulator			0.0088	CDKN1C,PROX1,TTR
MIXL1		transcription regulator			0.0285	CDH1,SOX17
PEX14	0.239	transcription regulator			0.0102	BDNF,PTGS2
TBL1XR1	0.345	transcription regulator			0.0391	DIO1,RARB,SMAD7
